# Supplementary material for: Sustained attention in skilled and novice martial arts athletes: a study of event-related potentials and current sources
Source: PeerJ. 2016 Jan 26;4:e1614. doi: 10.7717/peerj.1614 (PMC4741076; doi:10.7717/peerj.1614)
Supplement: Supplemental Information 1 — CPT nontarget ERPs skilled. [file peerj-04-1614-s001.xls]

## Sheet: 10
	FP1	FP2	F3	F4	C3	C4	P3	P4	O1	O2	F7	F8	T3	T4	T5	T6	CZ	FZ	PZ	FCZ	CPZ	CP3	CP4	FC3	FC4	TP7	TP8	FPZ	OZ	FT7	FT8	A1	BP1
-200	-0.950591	-2.70636	-1.83387	-2.79936	-0.556481	-0.00513833	0.317035	0.732726	1.90118	0.665414	-1.64016	-2.03786	-0.472726	0.358656	0.611975	0.711145	-0.19834	-2.38727	0.580631	-1.01482	-0.297509	-0.334505	0.306245	-1.07545	-0.779485	0.249723	1.14328	-0.477865	1.33854	-0.927469	0.225573	0.603754	4.26636
-198	-0.404387	-2.89134	-1.65506	-1.89707	0.994267	0.713714	1.65711	1.41818	4.30387	2.10209	-1.61292	-1.04103	-0.564703	0.403359	2.14628	1.12478	0.578576	-1.14688	1.41972	-0.182925	0.461422	1.10526	1.0179	0.171106	-0.0724505	0.833437	3.03984	0.0041107	2.94889	-0.187035	0.840117	0.325256	3.26747
-196	-0.330395	-2.32458	-1.16126	-0.877627	1.02047	0.972686	1.64016	1.11605	4.21343	1.8868	-1.19415	-0.331422	-0.658734	0.0328853	2.42221	0.536442	0.560592	-0.180869	1.07237	0.0179842	0.363794	1.06723	1.00814	0.507153	0.102253	1.04873	1.86008	0.0405928	2.66577	-0.0292885	0.685453	0.246126	1.54715
-194	-0.743003	-1.42948	-0.756876	-0.254861	-0.625849	0.406442	-0.113557	-0.327312	0.816481	-0.120237	-0.298537	-0.0904346	-0.413636	-0.638181	0.707548	-0.501501	-0.309328	0.0226087	-0.482489	-0.43162	-0.81237	-0.556481	-0.0313438	-0.583201	-0.169565	0.231225	0.124861	-0.390513	0.134624	-0.249209	-0.205019	0.216324	-0.107391
-192	-1.01174	-0.0904346	-0.168537	0.618655	-1.57952	-0.151067	-1.48652	-1.1962	-2.27628	-1.86265	1.01277	0.398735	0.263596	-1.01585	-1.16589	-0.799524	-0.677746	-0.046245	-1.43565	-0.441383	-1.38324	-1.64478	-0.849366	-1.26917	-0.232253	-0.618655	-0.303675	-0.562647	-1.96336	-0.0313438	-0.836007	0.00205533	-0.696758
-190	-0.890987	1.6864	-0.165968	1.10577	-1.653	-0.415691	-1.93561	-1.45466	-3.59375	-3.57833	1.26814	1.06158	-0.0611461	-0.777943	-2.14628	-1.1217	-0.731698	-0.231225	-1.83747	-0.237905	-1.45877	-1.97261	-1.16332	-1.33083	-0.644347	-1.10423	-0.815967	-0.263596	-3.41853	-0.174189	-0.611975	-0.262569	-0.755849
-188	-0.956243	1.92019	-0.919248	0.0976283	-1.50656	-0.978852	-1.95051	-1.79533	-3.78798	-4.23758	0.0287747	0.432647	-1.46545	-0.453715	-2.21513	-1.82154	-1.02664	-0.727074	-2.13241	-0.494307	-1.69565	-1.95205	-1.50245	-1.38735	-1.81434	-1.43411	-1.94434	-0.789248	-4.0115	-0.740434	-0.357114	-0.137707	-0.181383
-186	-0.740947	0.366877	-0.617627	-0.655651	-0.14079	-0.986046	-1.03435	-1.33031	-2.58664	-2.34873	-0.538497	-0.740947	-1.71517	-0.627904	-1.20751	-1.71004	-0.660276	-0.834465	-1.44747	-0.299051	-1.15818	-0.697272	-1.17925	-0.41415	-1.95514	-0.683398	-2.37031	-2.1211	-2.49723	-0.661303	-0.586284	-0.0534386	0.699841
-184	0.143873	-0.3083	0.641778	0.355059	1.29948	0.0611461	0.46913	-0.0873516	0.0256916	0.114071	0.192687	-0.478379	-0.192687	-0.655651	0.607351	-0.906402	0.406442	-0.0467588	-0.100711	0.569841	-0.0457311	0.896639	-0.0596046	0.800552	-0.377154	0.802607	-1.63964	-1.84517	0.127431	0.423912	-0.46245	-0.559564	0.340671
-182	0.536442	0.573438	1.00249	0.934149	1.30514	0.590908	1.28561	0.525651	1.92636	0.907943	0.244585	0.12332	1.40379	-0.291857	1.95411	-0.496877	0.907943	0.626876	0.617114	1.00095	0.407984	1.37245	0.381778	0.845769	1.0179	1.42126	-1.05798	-0.434189	1.50759	1.01122	-0.263596	-0.957785	-0.624821
-180	0.388972	1.59186	0.416205	0.426995	0.654623	0.296482	0.829841	0.234308	0.933121	0.433161	-0.237905	0.003083	1.27636	-0.255375	1.31027	-0.47992	0.645888	0.7949	0.429051	0.940829	0.248695	0.852963	0.012332	0.298023	1.26506	0.824702	-1.07443	0.225573	0.810315	0.455256	-0.526165	-0.839603	-1.11399
-178	0.279525	1.64581	0.224545	0.409525	0.215296	0.176245	0.0292885	-0.199367	-1.19055	-0.108933	0.448063	-0.0940315	0.297509	-0.6166	-0.193715	-0.70909	0.436244	0.955216	0.0570355	0.90486	0.132055	0.213755	-0.217865	0.142332	0.930038	0.0467588	-0.569841	0.750196	-0.529762	0.440355	-0.696758	-0.704465	-1.38221
-176	0.162885	0.699841	0.812884	1.26352	0.230197	0.0909485	0.015415	-0.51743	-1.4711	-0.701896	1.47676	0.328853	0.286719	-0.834465	-0.0786164	-1.18387	0.479406	1.10885	0.0143873	0.960868	0.251778	0.249723	-0.35249	0.38743	0.662845	0.249209	0.256917	1.27122	-1.13506	0.848339	-0.519485	-0.898694	-1.66482
-174	-0.0323715	-0.80158	1.14533	1.78146	0.600671	-0.23996	0.608892	-0.630987	-0.100711	-0.842173	1.38273	0.750196	1.01071	-0.570869	1.21162	-1.36577	0.492766	0.960868	0.231225	0.867864	0.418774	0.909485	-0.481975	0.55905	-0.0935177	1.11091	0.145929	0.645374	-0.632015	1.19929	-0.294426	-1.21265	-1.87806
-172	-0.107391	-1.92482	0.967034	0.892014	1.24707	-0.276956	1.02407	-0.349407	0.831382	0.0786165	0.519485	0.606837	1.17411	-0.225573	1.59597	-1.0734	0.485058	0.746086	0.402331	0.714742	0.45577	1.56359	-0.304703	1.12067	-0.981421	1.29332	-1.1628	-0.696758	0.232766	1.56976	0.118695	-1.23731	-2.26857
-170	0.357114	-1.9649	1.45363	-0.218379	1.77581	0.204506	1.01585	-0.021581	0.360197	0.816995	-0.444979	0.231225	0.667469	-0.470157	1.04925	-0.674149	0.601185	0.801066	0.425454	0.931066	0.581145	1.70644	0.0734781	2.26857	-0.261541	0.713714	-2.50442	-0.993239	0.343241	1.51375	0.460395	-0.766125	-2.46794
-168	1.61755	0.0498418	2.56043	0.618655	1.78095	0.84988	0.978338	0.0852963	-0.327826	0.529248	-0.459881	0.461936	0.505612	-0.923358	0.960354	-0.238932	0.946994	1.24193	0.508181	1.31079	0.885848	1.68589	0.420316	2.53782	1.35446	0.461936	-2.08873	1.04103	-0.0421343	1.47727	0.178814	-0.384347	-2.57225
-166	3.28031	4.47086	2.63442	2.55478	1.58518	1.2219	1.03075	0.177786	-0.239446	0.263596	1.10269	1.5194	1.4413	-0.872489	1.41099	0.146442	1.32826	1.91146	0.64743	1.58672	1.14533	1.69205	0.700355	1.70336	2.41502	1.19723	-0.159802	4.76734	0.0282609	1.54201	0.0873516	-0.812884	-3.52541
-164	4.11221	7.53588	1.73727	2.65343	1.36423	1.08367	0.670038	0.318577	0.0483003	0.938773	2.26498	2.19664	2.56557	-0.484545	1.19877	0.578576	1.36423	2.12521	0.582687	1.74909	1.15612	1.14482	0.752766	1.38889	2.70328	2.08102	1.20237	7.07137	0.641264	1.26814	0.674663	-1.3411	-4.21086
-162	3.30652	6.06683	1.66225	1.05079	1.15818	0.799524	0.274387	0.276956	0.471185	1.44027	2.13857	1.64581	2.40834	-0.280039	0.601699	0.751738	1.09652	1.61189	0.3566	1.44541	0.839603	0.660276	0.497904	1.54304	1.71517	1.88731	0.605295	5.92193	1.14122	0.587311	0.907943	-1.10371	-2.98332
-160	2.00035	2.45458	2.1247	-0.319604	0.736837	0.337588	0.324743	-0.13668	1.38941	0.673635	1.77581	0.516916	1.60419	-0.25332	0.708062	0.0380237	0.573438	0.858615	0.131027	0.722449	0.346324	0.763556	-0.00976283	1.04771	-0.067826	1.03743	-0.703438	3.35636	1.13917	-0.0904346	0.046245	-0.714742	-1.15099
-158	1.20854	0.00616603	0.86735	-1.62731	-0.360711	-0.875572	-0.150039	-0.861698	1.14944	-0.681857	1.12529	-0.612489	0.701896	0.113043	0.641778	-0.814939	-0.340158	0.151067	-0.452173	-0.175731	-0.380237	0.0981421	-0.870433	-0.0565216	-1.60624	0.319604	-0.577035	1.37039	0.272332	-0.135652	-1.37245	-0.745572	-0.661817
-156	0.332964	-0.679801	-1.31284	-2.56711	-1.35344	-2.08359	-1.06158	-1.21984	-0.523082	-1.34727	0.707034	-1.28869	-0.278498	0.447549	-0.0750196	-0.84988	-1.05593	-0.101739	-1.11039	-0.842173	-0.922844	-1.08624	-1.56359	-0.962923	-2.71355	-0.258458	0.0626876	-0.419802	-0.998378	0.520513	-1.96541	-0.671066	-0.734781
-154	-0.478893	-0.14747	-1.61344	-1.20648	-1.02767	-2.1432	-0.977311	-0.762015	-1.23269	-1.13454	0.579604	-0.793872	-0.358142	-0.055494	-0.174703	-0.312924	-0.842173	0.401304	-0.854505	-0.619683	-0.594505	-0.907943	-1.3519	-0.802094	-2.61644	-0.298023	-0.120751	-1.51838	-1.37348	0.558537	-0.90486	-0.417746	-0.670552
-152	-0.818536	0.387944	-0.489169	0.925413	-0.0662845	-1.41047	-0.247154	-0.246126	-0.754307	-1.02458	0.243557	0.0143873	0.482489	-0.604782	0.408497	0.0899208	-0.316007	0.819564	-0.206047	-0.0287747	-0.0477865	-0.00976283	-0.731698	-0.055494	-1.43462	0.286719	-0.869406	-1.45466	-1.07802	-0.32577	0.202964	-0.318577	-0.578062
-150	-1.08367	-0.342213	-0.193715	0.771264	0.410039	-0.736837	0.25332	0.0447035	0.003083	-0.65154	-0.0611461	-0.312411	0.47324	-0.24664	0.685967	0.283636	-0.19166	0.0960868	0.0518971	-0.0683398	0.0395652	0.527193	-0.309328	0.0662845	-0.518972	0.638695	-1.74344	-2.07743	-0.372529	-0.468102	-0.0077075	-0.0873516	0.503556
-148	-1.12478	-1.34265	-0.615572	-0.941342	0.388458	-0.330909	0.519999	0.598102	0.599129	0.758418	-0.560592	-1.34265	-1.00146	0.29083	0.394624	0.908457	-0.278498	-1.23988	0.200395	-0.531303	-0.0190118	0.795928	0.115099	-0.38743	-0.105336	0.500987	-0.742489	-3.45553	0.70241	0.124861	-0.542608	0.253834	2.16272
-146	-0.544149	-1.03486	-0.237905	-2.21873	-0.214782	-0.333992	0.306245	0.953674	0.545691	2.0913	-0.740947	-2.04865	-1.33597	0.314466	-0.13668	1.46237	-0.46656	-1.85751	0.194229	-0.919248	-0.166482	0.401818	0.303675	-1.00968	0.124861	0.163913	1.88936	-3.08248	1.18541	0.433161	-1.06158	0.283636	2.3513
-144	0.136166	-0.546718	0.208616	-2.76339	-0.641778	-0.647944	-0.0205533	0.77743	0.88071	2.51573	-0.177786	-2.01371	0.51075	0.272845	-0.310869	1.41818	-0.747113	-1.72237	0.13668	-1.23371	-0.443438	-0.162885	0.0570355	-1.11039	-0.501501	-0.473754	2.57482	-1.38427	1.44593	0.542608	-1.20545	0.150039	1.40174
-142	0.584742	-0.494307	-0.4866	-2.04865	-0.342213	-0.51743	0.275415	0.871461	1.90786	2.656	0.461936	-1.0996	1.82616	0.319604	0.118182	1.72083	-0.722963	-1.39608	0.442924	-1.19826	-0.374071	0.0611461	0.12332	-0.576521	-1.33442	-0.636125	1.29743	-0.0899208	2.14166	0.664386	-0.345296	-0.141304	0.735295
-140	0.6166	-0.609406	-1.50399	-0.493794	-0.75071	-0.51075	0.0549801	0.484031	1.3668	1.51324	0.736837	-0.484031	1.08367	0.161344	-0.055494	1.51684	-0.940829	-1.46648	0.095573	-1.19261	-0.603754	-0.245612	-0.0262055	-0.658734	-1.36885	-0.477351	0.525651	0.400276	1.40225	0.252806	0.194743	-0.296482	0.743003
-138	0.169051	-1.65351	-2.29786	-0.262055	-1.89502	-1.26249	-1.30103	-0.983477	-1.1032	-1.19363	0.0205533	-1.07237	-0.817509	-0.0046245	-1.43873	-0.0441897	-1.78608	-2.12213	-1.28972	-1.75268	-1.61703	-1.62782	-1.06672	-1.38324	-1.24553	-1.49063	-0.231739	0.233794	-1.09703	-0.983477	-0.373557	0.156719	1.44747
-136	-0.200909	-2.76545	-2.31893	-0.972686	-1.48241	-1.27379	-1.43411	-1.25016	-2.05585	-1.7383	-0.964465	-1.41304	-2.28604	0.102253	-1.82308	-0.541066	-1.783	-2.08205	-1.51838	-1.68743	-1.66019	-1.42897	-1.24861	-0.873516	-0.865295	-2.19098	-1.61498	0.160316	-1.77632	-1.54972	-0.49328	0.796955	2.06715
-134	-0.402845	-2.54553	-0.908971	-0.913082	0.403873	-0.377154	0.0909485	0.0405928	-0.367391	0.201936	-1.09652	-0.653082	-2.0132	0.350948	-0.350948	0.574465	-0.7132	-0.779485	-0.26411	-0.704979	-0.504584	0.38075	-0.243557	0.891501	-0.0575493	-1.19209	-1.23474	0.0816994	-0.0488141	-1.07031	0.357628	0.958299	1.59391
-132	-0.337588	-1.89245	0.555454	-0.225059	0.970631	-0.0077075	0.853477	0.606837	0.815453	1.09909	-0.830354	0.0179842	-0.369446	0.190118	0.609406	1.0102	-0.214782	0.256917	0.396165	-0.217865	0.0750196	1.06209	0.273873	1.07031	0.487628	-0.140276	0.675177	-0.425454	0.944425	-0.811856	0.390513	0.605809	0.320118
-130	-0.294426	-2.13446	0.245612	0.322687	-0.492766	-0.469644	0.0632015	0.118695	0.0909485	0.864267	-0.365849	-0.0765611	0.796441	-0.252292	-0.108419	0.410553	-0.751224	-0.179328	0.0164427	-0.763556	-0.349407	0.0364822	-0.125375	-0.854505	-0.2266	0.0765611	1.06518	-0.941856	0.621224	-0.691619	-0.489683	0.450632	-0.00205533
-128	-0.415691	-1.79122	-1.14225	0.531817	-1.82514	-0.794386	-1.03692	-0.361225	-0.834465	0.808773	-0.184466	-0.0996836	0.389486	-0.566758	-1.32107	-0.165454	-1.26711	-0.921303	-0.510236	-1.47573	-0.863753	-1.39197	-0.607865	-2.05739	-1.4562	-0.459367	-0.362766	-0.862212	0.307786	-0.373557	-0.553398	0.518458	0.45577
-126	-0.280553	0.127944	-1.40071	0.779999	-0.991184	0.0210672	-0.606323	0.0750196	0.218379	1.36885	-0.338102	0.645374	-0.729129	-0.491738	-0.957271	0.0405928	-0.741461	-0.468616	-0.130514	-1.07443	-0.324229	-0.994267	-0.003083	-1.06158	-0.86992	-0.599643	-1.23731	-0.172648	1.11553	-0.0262055	0.155178	0.269762	0.0724505
-124	-0.162885	2.03478	-0.0811856	1.53533	0.773833	1.03948	0.78154	0.892014	2.14834	1.83798	-0.40079	1.42897	-1.12684	0.0287747	0.570869	0.723991	0.249723	0.550315	0.760473	-0.0318577	0.636125	0.669011	0.982449	0.552371	0.667469	0.461936	-0.473754	0.787192	2.10466	0.201423	0.759959	-0.0380237	-1.44747
-122	-0.526165	2.48541	1.57798	2.02861	1.23731	0.808773	0.902291	0.737864	1.86008	1.03692	-0.839603	1.41458	-0.718853	0.727588	0.882252	0.843714	0.484031	1.1217	0.807746	0.291857	0.63407	1.0102	0.80569	1.09292	1.25427	1.04925	0.763556	1.12273	1.3113	-0.279011	1.06775	-0.0822133	-2.79834
-120	-1.37502	1.72802	2.1766	0.648457	0.415691	-0.293399	-0.0405928	-0.213755	0.179328	-0.5349	-1.33237	0.598102	0.125889	1.07905	0.0837548	0.255375	-0.119209	1.01585	0.00102767	-0.0996836	-0.0560078	0.250237	-0.14747	0.662845	0.728102	0.186521	1.66328	0.367391	-0.326284	-0.649999	0.858101	-0.0015415	-2.65035
-118	-1.82051	0.921817	1.47778	-1.14996	-0.737864	-0.943911	-0.905374	-0.975769	-0.547232	-1.37296	-1.02818	-0.12332	0.802607	0.799011	-0.626363	-0.395652	-0.873516	0.551343	-0.821105	-0.616086	-0.75071	-0.645374	-0.720908	-0.193715	0.0745058	-0.879682	1.45055	-0.515375	-0.848339	0.287233	0.323715	-0.043162	-1.29537
-116	-1.08213	0.741975	0.174189	-0.759445	-1.24502	-0.68494	-1.34213	-1.00043	-0.282094	-0.792331	0.144901	-0.144387	0.473754	0.292371	-1.02972	-0.291343	-1.1962	0.0786165	-1.04257	-0.844228	-1.09087	-1.38427	-0.584742	-0.703951	0.107391	-0.86735	0.65411	-0.469644	-0.221462	0.960354	-0.203478	-0.186008	-0.0149012
-114	0.138221	1.46134	-1.14688	0.23996	-1.14893	-0.576521	-1.3185	-0.54826	-0.0534386	0.161344	1.17925	0.00719366	-0.892014	-0.100711	-1.21676	0.405928	-1.29435	-0.435731	-0.899722	-0.971145	-1.03075	-1.57284	-0.291343	-0.769208	-0.436244	-0.293399	0.833951	0.481975	0.359169	-0.0323715	-0.502529	-0.0508695	0.287747
-112	0.280553	1.43925	-1.44901	-0.588853	-1.1479	-0.77486	-1.1181	-0.262569	-0.580631	0.824702	0.818536	-0.1783	-2.42683	-0.162885	-1.43	0.51743	-1.27893	-0.969603	-0.735295	-1.2517	-0.857587	-1.31336	-0.263083	-1.12016	-1.48087	-0.450632	1.11656	0.607351	0.250751	-2.02759	-0.133083	0.628932	0.907943
-110	-0.56162	0.353003	-0.769208	-1.4413	-0.996836	-0.559564	-1.07648	-0.290316	-1.81486	0.745572	0.0200395	-0.291343	-2.15193	0.0251778	-1.72853	-0.03083	-0.941342	-1.13352	-0.610434	-1.20237	-0.67158	-0.995295	-0.324743	-1.26043	-1.12221	-1.08419	0.14747	-0.335019	-0.578576	-2.76853	0.34992	1.22652	2.03015
-108	-0.758418	0.451146	-0.402845	-0.476837	-1.07699	-0.333478	-1.3149	-0.638695	-2.50853	-0.665414	-0.177786	0.32166	-0.191146	0.131027	-1.78557	-0.696244	-0.717825	-0.801066	-0.736323	-0.84988	-0.693675	-1.31901	-0.447035	-1.18182	0.0102767	-1.1885	-1.40379	-0.767153	-1.64478	-1.06415	0.395138	1.02972	1.72391
-106	-0.642291	0.267193	-1.04154	0.150039	-1.5934	-0.355573	-1.46751	-0.764584	-1.92431	-1.51067	-0.49739	0.572924	0.217865	0.127431	-1.62012	-0.878141	-0.802607	-0.951105	-0.783082	-0.858615	-0.7466	-1.95051	-0.404901	-1.4562	0.176245	-1.03126	-1.48087	-1.15612	-1.66482	0.124348	0.304189	0.734781	1.39917
-104	-0.780513	-1.58774	-1.45055	-0.058577	-1.04514	-0.207589	-0.673121	0.00873516	-0.419288	0.0256916	-1.03897	0.0436758	-1.35909	0.307786	-1.0698	0.0328853	-0.397707	-1.36782	-0.0565216	-0.73324	0.0236363	-1.18439	0.16083	-0.806204	-0.188577	-0.921817	0.65822	-1.72853	-0.124861	-0.358142	0.50407	0.985018	2.53063
-102	0.158261	-1.89348	-0.514861	0.138735	0.471699	0.261541	0.789248	0.844228	1.14379	1.85597	-1.3817	-0.0904346	-2.04506	0.271818	0.117668	1.00557	0.462964	-0.97988	1.00095	-0.109446	1.20545	0.722963	0.809287	0.502529	0.265652	-0.404901	1.99984	-1.04565	1.40842	-0.436244	1.2183	1.05901	2.79679
-100	1.8647	0.389999	0.586797	0.189604	1.36474	1.15818	1.48189	1.04205	1.45106	1.65249	-1.44182	0.127944	-0.659762	0.0642291	0.957271	1.05233	0.988615	-0.0781026	1.45209	0.468616	1.66893	1.62525	1.16948	1.08162	1.83284	0.236877	0.681343	1.11245	1.36885	-0.188577	1.26403	0.700868	1.42126
-98	2.5445	2.33948	0.36996	-0.0858101	0.683912	1.08881	0.609406	0.305217	0.0077075	-0.78822	-1.07597	0.288774	1.13043	0.418774	0.281581	0.0781026	0.596046	0.329367	0.753793	0.335533	0.991184	0.513833	0.644861	0.523082	1.83695	-0.058577	-1.04873	3.16059	-0.443952	0.0930038	0.446007	0.421343	0.00462453
-96	1.89759	1.72751	-0.536956	-0.466047	-0.697272	-0.128458	-0.6649	-0.775374	-1.69051	-3.13695	-0.14747	0.067826	0.889959	0.78822	-0.974228	-1.02921	-0.192687	0.36328	-0.256917	-0.172134	0.009249	-0.936204	-0.492252	-0.540039	-0.236363	-0.677746	-0.754307	2.56814	-2.30146	0.7466	-0.231225	0.486086	-0.0734782
-94	0.760473	-0.331422	-0.240474	-0.438814	-0.689564	-0.312411	-0.807232	-0.893042	-2.16838	-3.38616	0.100711	-0.242015	-0.307786	0.583201	-1.27276	-1.03126	-0.108933	0.902805	-0.299565	0.0508695	0.00359683	-1.01688	-0.730157	-0.248181	-0.674663	-0.516916	0.405928	-0.282608	-2.63905	0.58577	-0.656165	0.648971	0.861184
-92	0.0698813	-1.00557	0.630987	0.40079	0.169051	0.587311	-0.349407	-0.405414	-2.09798	-2.89699	-0.129486	0.207589	0.266679	0.321146	-0.995295	-0.669525	0.553398	1.51889	0.0981421	0.828299	0.663359	-0.548774	-0.0267193	0.683912	0.911026	-0.165454	0.435217	-1.46545	-2.36672	-0.42494	-0.382292	0.672608	0.646916
-90	0.420829	-0.372015	0.791303	1.32569	0.635612	1.2815	0.116126	0.142332	-1.72956	-2.02502	0.720394	0.833437	1.41047	0.546718	-0.712173	-0.560592	1.12992	1.76656	0.446007	1.40431	1.25118	-0.114585	0.822133	0.788734	2.06098	0.203992	0.280039	-0.015415	-1.72956	-0.718853	0.351462	0.767153	-0.562647
-88	0.913595	-0.487114	0.711659	1.65968	0.876086	1.22446	0.383833	0.458339	-1.18695	-1.06929	1.26763	1.0066	0.988101	0.990157	-0.693161	-0.382292	1.41099	1.63399	0.700868	1.43514	1.40225	0.209644	1.11656	0.828299	1.82873	0.0179842	0.760473	1.18233	-1.07288	-0.202964	0.810315	0.941856	-0.883279
-86	0.368932	-1.66276	1.11193	1.45106	1.00609	1.04462	0.503043	0.366877	-0.480434	-0.917706	0.410553	0.754307	0.0606323	1.17051	-0.635612	-0.302648	1.38221	1.12427	0.76818	1.22857	1.3113	0.32166	0.989129	1.17257	1.70798	-0.569327	1.30822	0.557509	-0.738378	-0.0786165	0.667469	0.936718	-0.372529
-84	-0.593477	-2.66834	2.21719	1.37502	1.05644	1.36474	1.15869	0.754821	1.34213	-0.169051	0.03083	0.643319	0.0755335	1.35755	0.304189	-0.0303162	1.67458	1.07083	1.35395	1.44541	1.66996	0.80826	1.27174	1.16948	1.87498	-0.188063	1.28099	-0.729129	0.625335	0.183952	0.548774	0.692133	0.173676
-82	-0.868378	-2.2696	2.95865	1.66636	1.08162	1.59545	1.82411	1.49012	2.46332	0.712173	0.680315	1.23731	0.639722	1.67355	1.09909	0.481975	2.15759	1.5564	2.05482	1.89296	2.30454	1.43873	1.81434	0.98656	1.19107	0.520513	0.237905	-0.995295	1.68383	1.07545	1.07905	0.306758	0.0421343
-80	-0.691106	-1.40328	2.21925	1.10012	0.914109	1.44798	1.37707	1.49885	0.831896	0.172648	0.761501	1.32363	0.799011	1.3447	0.495335	0.493794	1.99778	1.56154	1.69308	1.7979	2.26549	1.27688	1.85494	1.01431	0.837034	0.428023	-1.28612	-0.451659	0.413636	0.878141	1.16486	0.177786	-0.471699
-78	-0.653596	-1.23731	0.659248	0.261541	0.395138	1.3894	0.382806	1.12838	-0.984504	-0.276956	0.463477	0.744544	0.740947	0.516402	-0.484545	0.24664	1.46442	1.09601	0.978338	1.21213	1.64786	0.280553	1.47521	0.787706	1.17925	0.0667983	-1.54715	-0.203478	-0.916165	-0.0262055	0.776402	0.369446	-0.239446
-76	-0.282094	-0.739406	-0.712173	0.595533	0.052411	1.73933	0.246126	1.31593	-0.53079	0.885848	0.350948	0.734268	0.704979	0.095573	-0.479406	0.555967	1.36217	0.734781	1.08419	0.978852	1.51632	-0.312924	1.5302	0.354031	1.46699	-0.108419	-0.531303	-0.381264	-0.155178	-0.284664	1.07083	0.396679	0.515375
-74	0.183438	0.637667	-1.5749	0.511778	0.449604	1.95411	1.11759	2.05122	1.0215	2.9309	-0.0282608	0.726046	-0.219921	0.28415	0.265138	1.47008	1.70593	0.432647	1.84158	1.263	2.07794	0.42494	2.08925	0.36996	1.51889	-0.267707	0.655137	-1.01328	1.66225	-0.849366	1.31233	0.198853	1.15561
-72	-0.599129	1.75371	-1.48087	-0.497904	0.89407	1.38889	1.57798	2.34205	1.70541	3.54699	-0.515888	0.0904346	-1.48087	0.717825	0.600157	2.09644	1.72083	0.000513833	2.12162	1.20442	2.24031	1.16537	2.12008	0.511778	0.86324	-0.0981421	2.02656	-2.11442	2.36158	-1.67304	0.966006	0.242529	1.99419
-70	-2.22901	1.94126	-0.565216	-0.114585	0.349407	0.923358	0.7132	1.48138	0.760473	1.47521	-0.804663	-0.089407	-1.79379	0.859129	-0.114585	1.653	1.05747	-0.238932	1.27328	0.704979	1.49525	0.491224	1.33134	-0.021581	0.314466	-0.20913	2.56454	-2.31944	1.1402	-1.45518	0.769722	0.552884	2.57328
-68	-2.71201	1.4711	0.231739	1.55948	-0.407984	1.25632	-0.228142	0.493794	-0.408497	-0.862212	-0.263596	0.58577	-1.34778	0.852449	-0.841659	0.787706	0.525137	0.0560078	0.362252	0.463477	0.78154	-0.372529	0.772805	-0.663359	0.839603	-0.927469	2.14834	-0.982963	-0.212727	-0.346324	0.961382	0.67158	2.05174
-66	-1.85442	0.318063	0.320632	1.40174	-0.139249	1.33134	0.0637153	0.483517	0.0827271	-0.595533	0.455256	0.885848	-0.906402	1.09292	-0.35249	0.531303	0.454742	-0.0657706	0.354031	0.317035	0.645888	0.0447035	0.730157	-0.498932	1.30411	-1.17616	2.08513	0.00359683	0.1783	0.0626876	1.09138	0.543635	1.58723
-64	-1.0662	-1.09806	0.148498	-0.292885	0.568299	0.611975	0.930552	0.868892	1.60727	0.802607	0.0077075	0.457825	-0.767153	1.37142	0.840117	0.814426	0.401304	-0.794386	0.76407	0.0642291	0.780513	1.0513	0.582173	0.108419	0.755335	-0.52822	1.96849	-0.431106	1.33699	-0.394624	0.857074	0.586284	1.96798
-62	-1.19261	-2.57533	-0.299051	-1.02767	0.0498418	-0.400276	0.648457	0.617627	1.96438	0.834465	-1.01636	-0.152608	-0.718853	1.07494	1.12375	0.855018	-0.0827271	-1.13609	0.53079	-0.399248	0.365849	0.58988	-0.0673121	-0.0611461	-0.634584	0.261027	1.18593	-1.48344	1.26557	-0.704465	0.69573	0.841145	2.01628
-60	-1.83593	-4.12557	-1.13917	-0.83909	-1.38118	-0.957271	-0.68494	-0.0632015	0.838062	0.467074	-1.36166	-0.752766	-0.389486	0.214268	0.133597	0.480434	-0.725019	-0.995809	-0.293399	-0.962923	-0.563161	-1.16126	-0.693161	-1.07751	-1.4115	0.377667	-0.440869	-2.0615	0.529248	-0.262569	0.58577	0.933635	1.40739
-58	-1.28664	-3.5064	-0.996836	0.210672	-1.653	-0.455256	-1.1217	-0.0750196	0.227114	1.00249	-1.34059	-0.494307	-0.00565216	-0.296996	-0.692647	0.162885	-0.629959	-0.359683	-0.476323	-0.793872	-0.760987	-1.62885	-0.351976	-1.37091	-0.447035	-0.239446	-2.27217	-0.755849	0.657706	0.385889	0.479406	0.728615	0.201423
-56	0.457312	-0.236363	0.359683	1.56	-0.817509	0.68905	-0.608892	0.785137	0.64075	2.30454	-1.41356	0.420829	-0.00719366	0.0529248	-0.881738	0.543635	0.033913	0.70241	0.073992	-0.0775888	-0.181383	-0.86324	0.71577	-0.699841	1.10012	-1.07288	-1.52403	1.49731	1.55486	0.283636	0.326798	0.454228	-1.74806
-54	1.43616	2.60976	1.08265	1.71209	-0.192174	1.39557	-0.366877	1.47162	0.819564	3.28956	-1.02458	0.685453	-0.128458	0.655137	-0.906402	1.49937	0.415691	1.20134	0.416719	0.382806	0.201423	-0.561106	1.36012	0.024664	2.13189	-1.07802	1.74549	2.29786	2.05687	-0.154664	0.0775888	0.312411	-3.19399
-52	1.01739	3.25565	0.623793	0.860671	0.143359	1.36577	-0.435217	1.31079	0.138735	2.68529	-0.579604	0.501501	-0.0914623	0.873516	-0.883279	1.90683	0.296996	0.710117	0.18498	0.367905	0.0667983	-0.512292	1.17154	0.663359	2.46126	-0.207075	2.97201	2.00703	1.37502	-0.414663	0.385889	0.243557	-2.92834
-50	0.132055	2.71458	0.188577	-0.437272	-0.177272	0.805177	-0.77075	0.52411	-1.1366	0.906915	-0.890987	0.341185	0.121265	0.688536	-1.12941	1.36063	-0.150553	-0.0390513	-0.465533	-0.0118182	-0.404901	-0.691619	0.4866	0.436244	2.17095	-0.0344268	1.14379	1.67767	-0.100197	-0.619169	0.512805	0.102253	-1.46905
-48	-0.974741	1.33134	-0.206047	-1.41664	-1.33134	-0.21581	-1.45672	-0.331422	-2.01114	-0.880196	-1.76039	-0.0539525	-0.267193	0.121265	-1.65506	0.395138	-0.77486	-0.688023	-1.15356	-0.608892	-1.07905	-1.49628	-0.251778	-0.914109	0.700355	-0.931579	-0.506126	0.478379	-1.27739	-1.20545	-0.568299	0.114585	0.291343
-46	-2.27166	-1.61138	-1.14276	-1.12375	-2.0394	-1.27328	-1.88217	-0.91154	-1.89861	-2.03067	-2.1879	-0.727588	-1.0364	-0.351976	-1.65197	-0.330395	-1.27328	-1.34162	-1.46545	-1.28561	-1.56616	-2.07383	-0.846283	-1.87498	-1.87806	-1.20751	-0.744544	-1.98905	-1.54304	-1.59237	-1.45774	0.413636	2.11545
-44	-2.48695	-4.42513	-2.01834	-0.554426	-1.92019	-1.77221	-1.74549	-1.2332	-1.07648	-2.21668	-1.48446	-1.4151	-0.851935	-0.286719	-0.985018	-0.679287	-1.43873	-1.79533	-1.4449	-1.72545	-1.65095	-1.98648	-1.36525	-2.02656	-3.29881	-0.703951	-0.41826	-4.14663	-1.14276	-1.25838	-1.08367	0.458853	3.09173
-42	-1.38632	-5.07307	-2.02964	-0.933121	-1.29486	-1.27174	-1.15715	-0.940315	-0.199881	-1.14276	-0.145415	-1.76707	-0.272845	-0.344782	-0.392569	-0.558537	-1.13146	-1.80407	-1.09652	-1.49885	-1.2368	-1.37707	-1.31387	-1.56719	-2.19766	-0.561106	-0.495849	-4.46829	-0.421343	-0.635612	-0.377154	0.0734781	2.94992
-40	-0.434703	-3.49047	-1.80047	-1.99162	-0.60324	-0.34992	-0.566758	-0.453715	-0.201423	-0.368932	0.751224	-1.60367	-0.45577	-0.733754	-0.220948	-0.258458	-0.637667	-1.52557	-0.708576	-0.913082	-0.667983	-0.51743	-0.7466	-0.983477	-0.38332	-0.62739	-0.826757	-3.10509	-0.227628	-0.219407	-0.437786	-0.0375098	2.31225
-38	-0.307786	-1.13095	-2.14577	-2.786	-0.57241	-0.53079	-0.429565	-0.735295	-0.428023	-1.28047	0.309841	-1.44182	-0.957785	-1.04925	-0.272845	-0.598102	-0.59245	-1.48549	-0.789761	-0.749683	-0.625335	-0.1783	-0.766125	-1.07597	-0.186008	-1.18439	-0.941342	-1.66431	-0.774347	-0.634584	-1.14996	0.173676	1.34624
-36	-0.466047	-0.408497	-2.18687	-2.3143	-0.775888	-1.26557	-0.502529	-1.16024	-0.359169	-1.82308	-0.512292	-1.6083	-0.952133	-0.869406	-0.423399	-1.0662	-0.747113	-1.64272	-0.932607	-0.757904	-0.815453	-0.334505	-1.15458	-1.133	-0.487114	-1.77581	-1.10937	-1.34419	-0.980394	-0.890987	-1.60881	0.1783	0.861698
-34	-0.251778	-1.09703	-1.39917	-0.773833	-0.564189	-0.989643	-0.679287	-1.00917	-1.12941	-1.02407	-0.853991	-1.00609	-0.732726	-0.077075	-0.956243	-0.609406	-0.567786	-1.27482	-0.786165	-0.503556	-0.756876	-0.607865	-0.923358	-0.633042	-0.369446	-1.59494	-0.957271	-1.05284	-0.925927	-0.526165	-1.27688	0.0652568	0.235336
-32	0.170079	-1.07545	-0.000513833	0.744544	0.460908	-0.0760473	-0.409011	-0.385889	-1.63091	-0.208616	-1.17205	0.809287	-0.446521	0.679287	-1.1217	0.371501	0.0298023	-0.0837548	-0.316007	0.161344	-0.19577	-0.169565	-0.0518971	0.500987	-0.426482	-0.979366	0.443438	0.089407	-0.816481	-0.503556	0.0441897	0.0960868	-1.28304
-30	0.266166	-0.347865	1.60778	1.53276	1.59031	0.426995	0.519485	0.101739	-0.494821	-0.036996	-0.554426	2.00189	-0.0662845	0.688536	-0.175217	0.565216	0.634584	1.24553	0.276956	0.980907	0.524624	0.945453	0.581145	1.69	0.150553	-0.0667983	1.69925	1.37296	-0.253834	-0.176245	0.99067	0.156205	-2.47565
-28	0.264624	-0.0477865	2.37134	1.77735	1.47008	0.484031	0.958299	0.0811856	0.694702	-0.289802	1.02047	1.77067	-0.070909	0.073992	0.717311	-0.125889	0.723991	1.98442	0.480948	1.31336	0.59656	1.20905	0.466047	1.73624	0.940315	0.602212	0.602212	2.16838	0.256403	0.783596	0.875058	0.0816995	-2.55786
-26	0.413122	-0.397193	2.25008	1.47316	0.968575	0.65154	0.736837	0.125889	0.581145	-0.267707	1.42023	0.837548	-0.000513833	-0.415691	0.848339	-0.415691	0.613003	1.88628	0.447549	1.24296	0.388458	0.804149	0.305731	1.4485	1.5379	0.986046	-1.12684	1.90581	0.191146	1.12889	0.344782	-0.106877	-1.37656
-24	0.598102	-0.0868377	1.52249	0.331936	1.06363	0.870947	0.568299	0.406442	-0.0806718	0.508695	0.662845	-0.0837548	0.753793	-0.4383	0.672608	-0.103794	0.580118	0.962409	0.484031	0.937232	0.408497	0.710631	0.430078	1.55229	1.44541	1.32158	-0.833437	0.799524	0.040079	0.661817	-0.252806	-0.432647	0.173162
-22	0.555454	1.18284	0.052411	-0.876599	1.06877	0.570869	0.51743	0.402845	-0.351976	1.31284	0.644861	-0.432134	1.18027	-0.027747	0.412094	0.0452173	0.509209	-0.0426482	0.479406	0.375098	0.401304	0.727074	0.244585	1.01225	0.0693675	1.19723	0.666955	0.0580631	0.232766	0.268221	-0.194229	-0.560592	1.01071
-20	0.102253	1.90889	-1.11964	-1.77375	0.443952	-0.255375	0.194229	-0.21581	-0.875058	0.373557	1.30565	-0.693675	0.531303	0.119209	-0.129486	-0.263596	0.13	-0.714228	0.077075	-0.250237	0.00719366	0.42494	-0.44241	-0.20245	-1.23474	0.47324	1.17	-0.0590908	-0.388972	0.267193	0.0318577	-0.210158	1.1366
-18	0.0966006	2.38984	-1.34213	-1.8277	0.027747	-0.67158	0.164427	-0.566244	-0.799524	-0.807746	1.45672	-0.611975	-0.10996	-0.161344	0.0323715	-0.511264	-0.0781026	-0.600157	-0.128972	-0.405928	-0.304189	0.265138	-0.67158	-0.532331	-1.45723	0.0724505	0.52822	0.23328	-0.952133	0.0745058	-0.055494	-0.0292885	0.379723
-16	1.14842	3.28699	-0.7949	-0.273359	0.600671	-0.457312	0.830868	-0.364822	0.570869	-0.423912	1.4228	0.255889	0.19166	-0.44909	1.29897	-0.677746	0.212213	0.494821	0.265652	0.100197	-0.0534386	0.716797	-0.267193	0.492252	-0.997864	0.76407	-0.330909	1.27431	-0.16083	-0.208102	-0.0169565	-0.451145	-1.02253
-14	2.26189	3.25154	0.268221	1.31182	1.28612	-0.423912	1.22601	-0.552884	1.48446	-0.237391	1.38016	0.665414	1.19569	-0.710631	1.96747	-1.05233	0.249723	1.22703	0.347351	0.493794	0.0822133	1.27431	-0.36996	1.3745	-0.57909	1.67099	-0.556481	2.50237	0.38075	0.483003	-0.165968	-0.916165	-1.86316
-12	2.2064	2.266	0.91822	1.07391	0.670038	-0.677746	0.628418	-1.00917	1.16794	-0.701896	0.846283	0.16751	1.84929	-1.01842	1.29691	-1.27636	-0.257944	0.823675	-0.243043	0.17162	-0.498418	0.812884	-0.933121	0.789248	-0.535414	1.61703	-0.367905	2.47462	0.027747	1.63861	-0.775374	-1.01688	-1.84055
-10	1.2779	1.74344	0.943911	0.188063	-0.30162	-0.999919	-0.225573	-1.1551	0.37664	-1.0662	0.465019	-0.242015	1.40122	-1.38632	0.505098	-1.40328	-0.720394	0.0395652	-0.826758	-0.293399	-1.11553	-0.184466	-1.17051	-0.0899208	-0.902805	0.86992	-0.791303	1.38529	-0.376126	2.23877	-1.20956	-1.05695	-1.46186
-8	0.73992	1.81691	0.941342	0.577548	0.314466	-0.961896	0.390513	-0.491224	1.07648	-0.463991	0.195257	0.0760473	0.701382	-1.46494	1.40328	-0.921303	-0.427509	-0.302648	-0.351462	-0.114585	-0.744544	0.490711	-0.68494	0.192174	-1.09035	1.33648	-0.917706	0.671066	0.406442	1.7794	-0.65822	-1.31747	-1.13814
-6	0.385889	0.998378	1.22035	0.937232	1.32723	-0.203478	1.62269	0.46913	2.76853	0.657193	0.11664	0.250751	0.901777	-1.20031	3.0198	0.0477865	0.217351	-0.0775888	0.552884	0.373043	0.055494	1.90786	0.110988	0.899208	-0.6166	2.59177	-0.67826	0.101225	1.67818	1.01533	-0.0621738	-1.44336	-0.485058
-4	0.1783	-0.487628	1.0919	-0.0498418	0.792845	0.0133597	1.05079	0.118695	1.93869	0.34581	0.703951	-0.359169	1.04719	-1.09395	2.55786	-0.355059	-0.0611461	0.0128458	0.0652568	0.178814	-0.228656	1.45672	-0.104822	0.556995	-0.4866	2.0466	-1.97723	-0.126917	0.936204	1.05027	-0.4383	-1.34008	-0.127944
-2	0.69573	-0.712687	0.0149012	-1.05901	-0.614544	-0.981935	-0.64743	-1.17051	-0.684426	-0.492766	0.90486	-1.02869	0.333478	-1.26249	0.65411	-1.4115	-1.08573	-0.308814	-1.31644	-0.670552	-1.38375	-0.0919761	-1.37553	-0.850394	-1.36885	0.323201	-2.79011	0.732212	-0.845769	0.86992	-1.02869	-1.49269	-1.44284
0	1.07391	-0.787706	-0.702924	-0.932093	-1.14585	-1.39968	-1.25786	-1.24193	-1.48806	0.238932	0.378181	-1.07699	-0.0046245	-1.07083	-0.193715	-0.858615	-1.27328	-0.275415	-1.55794	-0.833951	-1.68897	-0.765611	-1.69308	-1.44952	-1.57593	-0.238932	-0.481975	1.10063	-0.848339	0.238932	-1.21933	-1.77581	-2.70687
2	0.59656	-2.51059	-0.331936	-0.269762	-0.49328	-0.666442	-0.657193	-0.146956	-0.484031	1.47522	0.23328	-0.840117	0.230197	-0.733754	0.340671	0.179842	-0.590394	0.212213	-0.704465	-0.155691	-1.01328	-0.391541	-0.660789	-0.788734	-0.587825	0.513833	1.11605	0.1783	0.38332	0.547232	-1.15099	-1.68486	-2.57739
4	-0.624307	-4.20675	0.56162	0.0323715	0.609406	-0.0421343	-0.0241502	0.346837	0.238419	1.0883	0.357628	-0.973714	-0.0385375	-0.85656	0.923872	0.146956	-0.191146	0.476323	-0.201936	0.285177	-0.50407	0.419288	0.0138735	0.160316	0.209644	1.10012	-0.176759	-0.980394	0.716797	1.02921	-1.22652	-1.26968	-2.44636
6	-1.65197	-3.63074	1.24707	0.00565216	1.27533	-0.00719366	0.344268	0.218893	0.948022	0.1783	0.246126	-1.04308	-0.221976	-1.00609	1.27585	0.0287747	-0.0683398	0.681343	-0.000513833	0.393082	-0.327312	1.12684	-0.122806	0.896639	0.710631	1.19363	-1.27688	-1.49166	0.651027	0.472726	-1.01482	-1.08522	-2.85743
8	-1.45158	-1.78865	1.26249	-0.544149	1.00454	-0.064743	0.958299	0.444979	2.71201	0.675177	0.582173	-0.83909	0.77486	-0.85656	2.28913	0.599129	0.10585	0.985532	0.519999	0.498932	-0.058577	1.52506	-0.234308	0.900236	1.04873	1.72648	-0.32577	-1.56668	1.66585	0.404901	-0.381778	-1.38221	-3.22019
10	-0.54826	-0.89407	0.68494	-0.833951	0.628418	0.0287747	1.56359	0.745058	4.12197	1.97363	0.946481	-0.596046	1.7979	-0.497904	3.31422	0.888417	0.102253	1.2219	0.976283	0.462964	0.208616	1.79071	-0.277984	0.420829	0.83652	2.31482	1.04514	-2.08873	2.98537	1.05336	-0.130514	-1.55948	-3.02905
12	0.135138	-1.30771	-0.22917	-0.0786165	0.437786	-0.295968	1.53585	0.736323	4.18157	3.36766	0.601699	-0.131541	1.75063	-0.0133597	3.12565	0.662845	-0.141304	1.01431	1.08573	0.102767	0.0914623	1.73162	-0.537983	0.135652	-0.283122	2.10312	0.831896	-2.87387	3.75663	1.30719	-0.180355	-1.29897	-2.33229
14	0.396165	-1.53276	-0.665414	0.186008	-0.0467588	-1.03692	1.12941	0.762528	3.70063	4.086	-0.049328	-0.122292	1.0996	-0.0344268	2.32869	0.714228	-0.485058	0.217865	1.00249	-0.529762	-0.289802	1.36114	-0.765098	-0.273359	-1.79174	1.43411	-0.194229	-2.52755	3.79723	1.17668	-0.366877	-1.03743	-1.67458
16	0.728102	0.792845	-0.106363	-0.38075	-0.0220948	-0.853991	1.21573	1.14893	3.44063	3.70114	-0.590394	-0.338102	0.655651	-0.492766	2.26343	1.12324	-0.340158	-0.018498	1.20699	-0.599129	-0.243043	1.52968	-0.393082	-0.638695	-1.75988	1.3632	-0.70241	-0.146956	3.41699	0.882252	-0.489683	-1.0215	-1.30411
18	1.40739	4.00584	0.397193	-0.653596	0.846797	0.11664	1.6417	1.45569	2.98588	2.96584	0.0298023	0.040079	0.699841	-0.512805	2.57482	1.2517	0.281067	0.445493	1.60162	0.107905	0.295968	2.11699	0.26411	-0.300592	-0.328853	1.72134	-0.804149	2.6447	3.03521	0.903319	0.0868378	-1.14174	-1.09395
20	1.70644	3.7926	-0.0298023	-0.431106	1.23423	0.394624	1.43925	1.09395	2.02296	2.1396	1.05593	0.0991698	0.7466	-0.357114	2.00703	0.792331	0.457825	0.412608	1.51324	0.535928	0.433675	2.03067	0.330909	0.146956	0.421343	1.34573	-0.868892	3.72991	2.24853	1.04051	0.598102	-1.05336	-0.824702
22	1.43308	1.53122	-0.225059	-0.281581	1.17976	0.200909	1.02253	0.791817	1.73778	1.92431	0.770236	-0.649999	0.212727	-0.375098	1.25889	0.509722	0.303675	-0.0919761	1.33031	0.406442	0.252292	1.5081	0.156205	0.57241	0.165454	0.929524	-0.117668	3.3692	1.91506	0	0.144901	-0.705493	-0.204506
24	0.989129	0.389486	-0.474782	-1.16435	1.03229	-0.0549801	0.855532	0.783082	2.04968	1.83644	-0.0128458	-1.38581	-0.735809	-0.402845	1.04668	0.545691	0.0765611	-0.848852	1.24296	0.0107905	0.0719366	1.21984	0.0190118	0.80569	-0.708062	0.982449	0.90075	1.92019	2.12162	-1.3745	-0.534386	-0.430078	0.938773
26	0.605809	-0.614544	-1.1664	-1.8534	0.584742	-0.390513	0.652568	0.639722	2.21616	1.3745	-0.152095	-1.51581	-0.859129	-0.538497	0.917192	0.428023	-0.236363	-1.21316	1.02767	-0.281581	-0.197826	0.988615	-0.400276	0.305731	-1.38684	0.80826	0.932607	-0.163913	2.16015	-0.65822	-0.673635	-0.335019	2.05533
28	0.498932	-2.01166	-0.312924	-0.754307	0.846797	-0.0143873	0.965492	1.02972	3.02442	2.25984	0.119209	-1.2219	0.333992	-0.465019	1.25221	0.797469	0.0750196	-0.277984	1.37861	0.0441897	0.0503556	1.21573	-0.4383	0.168023	-0.814426	0.621224	1.02047	-1.18336	2.94889	1.07443	-0.787706	-0.417233	1.96849
30	0.383833	-2.65138	1.30771	0.313952	1.37605	0.688536	1.69308	2.04146	4.12197	4.20778	0.472213	-0.852449	1.38016	0.0775888	1.96901	1.84517	0.811343	0.667469	2.10517	0.639722	0.849366	1.76656	0.172648	0.537983	0.225059	1.01533	1.35909	-1.30257	4.25865	1.37502	-0.727588	-0.715256	0.817509
32	-0.0996836	-2.44174	1.55383	0.0118182	1.25016	0.592963	1.88063	2.47411	3.91078	4.78173	1.01944	-0.526679	0.971658	0.507153	2.07589	2.25316	1.11913	0.530276	2.29632	0.873516	1.24399	1.8647	0.43162	0.690078	0.377154	1.62012	0.938259	-1.48498	4.31568	0.75071	-0.0231225	-0.870433	-0.159288
34	-0.546718	-1.56668	1.06775	-0.187035	1.40996	0.283636	1.6232	1.79379	2.34051	2.81786	1.23012	-0.0729643	0.326284	0.339644	1.60933	1.26506	1.12786	0.297509	1.80818	0.995295	1.01688	2.00035	0.142332	0.908457	0.249723	1.72956	-0.353003	-0.881738	2.62517	0.773833	0.472726	-0.816481	-0.86324
36	-0.41415	-0.571382	1.17257	0.912054	1.26865	0.19577	0.944425	0.697272	0.556481	-0.327826	1.08059	0.457825	0.593991	-0.382292	1.03692	-0.0149012	0.822133	0.64075	0.855018	1.21265	0.442924	1.70336	-0.274901	0.893042	0.725532	1.15458	-1.52711	0.541066	0.312411	1.38529	0.324229	-0.786165	-1.37296
38	-0.194229	-0.350434	1.43462	1.62217	0.198853	-0.36996	-0.336047	-0.283122	-1.00352	-2.30249	0.660276	0.253834	1.22909	-1.09344	0.199367	-0.592963	0.00102767	0.960868	-0.228142	0.989129	-0.485572	0.346837	-0.908971	0.577548	0.218893	0.410039	-1.32363	1.37399	-1.49628	1.30359	-0.34581	-0.651027	-1.59237
40	-0.306758	-0.0827271	0.904346	0.637153	-0.212213	-1.27944	-1.29948	-0.95316	-2.22387	-2.42118	-0.622252	-0.630987	1.48703	-1.14379	-0.757904	-0.601185	-0.785651	0.583714	-0.95573	0.296996	-1.3262	-0.567272	-1.58518	0.610948	-1.75371	-0.102253	0.169565	1.67818	-2.26498	0.33913	-1.04668	-0.531303	-1.76964
42	-0.0282608	1.6011	0.513319	0.20245	0.827271	-1.53739	-0.831896	-0.802094	-1.71672	-1.31439	-1.34008	-0.925927	0.710117	-0.549288	-0.710631	-0.450632	-0.77743	0.0529248	-0.782054	-0.0164427	-1.31644	0.241502	-1.69411	1.08984	-2.5594	-0.0899208	1.15099	2.48079	-1.4932	-0.332964	-0.914109	-0.739406	-1.74549
44	0.428023	3.48739	0.778457	0.848339	1.68897	-0.868892	0.157747	-0.150039	-0.351976	-0.225059	-0.64075	-0.80569	-0.771264	-0.0421343	-0.0416205	-0.389486	-0.297509	-0.219921	-0.141818	0.155691	-0.783082	1.40071	-1.30565	1.26249	-1.26608	0.382292	0.355059	3.20375	-0.331936	-0.878141	-0.432647	-0.866323	-1.18695
46	0.0529248	3.19758	0.37664	0.299051	0.646916	-0.311383	-0.191146	-0.0868378	-0.947508	-0.404387	-0.186521	-1.20083	-1.73316	-0.389999	-0.394624	-0.302134	-0.32577	-0.621738	-0.218893	0.086324	-0.807232	0.983477	-1.20699	-0.0262055	0.185494	0.300592	-0.282094	2.4926	-0.772291	-1.36834	-0.540039	-0.749169	-0.289802
48	-0.464505	1.06929	-0.795414	-0.62071	-1.03589	-0.553912	-1.20751	-0.451145	-2.39857	-1.16332	-0.553398	-1.50759	-1.35292	-1.16178	-1.13506	-0.115612	-0.746086	-0.564189	-0.74403	-0.146442	-1.27688	-0.173676	-1.51324	-1.95514	0.584228	-0.535414	0.341699	0.613003	-1.8164	-0.44909	-0.833951	-0.906402	-0.165454
50	0.323201	-0.330908	-0.69573	-0.307786	-1.06107	-0.821619	-1.06312	-0.37664	-1.87241	-1.13814	-0.53079	-0.930038	0.28826	-1.12273	-0.626876	-0.113043	-0.630987	0.490711	-0.593477	0.0642291	-1.19518	-0.186008	-1.61292	-2.23106	0.478379	-0.698299	0.385889	-0.402845	-1.43616	1.36525	-0.652568	-1.3	-0.935176
52	2.00189	0.830868	0.50407	0.477351	0.0750196	-0.492252	0.104308	0.221462	0.403873	0.377667	0.223517	-0.0544663	1.69205	-0.515375	0.683398	-0.03083	-0.0596046	1.40585	0.217865	0.529248	-0.443438	0.818536	-1.21984	-1.04154	3.28853e-08	0.0570355	-0.508695	0.712687	0.435217	2.20691	-0.516916	-1.42948	-1.69257
54	2.62415	2.75928	0.707034	1.23937	0.772291	-0.0411067	0.958813	0.9249	1.84774	2.67707	0.318577	0.216838	1.11399	-0.20245	1.3185	0.666955	0.227114	1.36114	0.936204	0.675691	0.10328	1.67869	-0.602212	-0.213755	-0.914109	0.788734	-0.633042	2.33948	2.18585	1.43	-0.819564	-1.04668	-2.23004
56	1.37759	1.8647	0.244071	1.4449	1.58466	0.366877	1.79379	1.66431	2.50031	4.14201	0.070909	0.0364822	-0.137193	-0.0107905	1.85648	1.57079	0.646402	1.17051	1.74395	0.916678	0.629446	2.80656	0.0883793	0.560592	-1.07545	1.53944	0.386403	2.30351	3.11229	0.616086	-0.688536	-0.346324	-1.71415
58	-0.25332	-0.382292	0.675177	0.951105	2.69351	0.807746	2.88928	2.29889	3.8743	4.16821	0.628932	0.238419	0.281581	0.49996	3.05885	2.08719	1.43205	1.5045	2.58561	1.62525	1.3596	4.01561	0.663872	1.81178	-0.133083	2.37853	1.75474	1.64889	3.78027	1.0847	0.110474	0.128972	-0.543122
60	-0.351976	-0.313438	1.71415	0.933121	2.74438	0.899208	3.0383	2.29324	4.89426	2.89134	0.835493	0.778971	1.56	0.815453	3.59786	2.17557	1.60367	1.98185	2.62774	2.043	1.44027	3.77359	0.662331	2.28861	0.604268	2.72126	2.27988	1.92071	3.70422	0.806718	0.752766	0.0966006	-0.485572
62	0.135652	0.331422	1.73367	1.02458	1.70541	0.567272	2.22798	1.58877	4.28177	1.07237	-0.018498	0.729643	1.90118	0.0750196	2.94735	1.66533	0.984504	1.71415	1.99676	1.6715	0.798497	2.66628	0.0734781	1.35703	0.374071	2.5111	0.711659	1.31284	2.55683	-0.646402	0.656679	-0.113043	-0.432134
64	-0.386916	-1.09241	0.259486	-0.0262055	0.655137	-0.302648	1.22395	0.777943	2.48027	0.157747	-0.406442	-0.168537	1.35344	-0.965492	1.69359	0.76407	0.226087	0.492252	1.28253	0.854505	0.0714228	1.82051	-0.741975	0.0673121	-0.689564	1.99059	-1.34316	-0.920789	1.39557	-0.727588	-0.140276	-0.166996	0.682884
66	-0.885848	-2.53217	-1.06415	-1.24399	0.0262055	-1.26608	0.49739	0.413122	1.15458	1.15715	0.0827271	-1.26917	0.261027	-1.11296	0.697785	0.139763	-0.243043	-0.454742	0.888417	0.158261	-0.318577	1.24348	-1.42948	-0.630473	-1.72134	1.40482	-1.8462	-2.1283	1.30514	-0.343754	-0.82573	-0.365849	1.10423
68	-0.536956	-2.52138	-0.705493	-1.01379	0.193201	-1.25273	0.545177	0.395652	0.512292	2.01885	0.341699	-1.59597	-1.19055	-0.843714	0.498932	-0.0888931	-0.15415	-0.351462	0.970631	0.168023	-0.178814	1.47727	-1.63091	-0.41826	-1.82565	1.05336	-1.10937	-1.2368	1.34881	-0.239446	-0.634584	-0.721422	0.889959
70	-0.0226086	-2.50853	0.361225	-0.168023	0.912568	-0.506126	0.748141	0.227114	-0.567272	0.381778	0.0513833	-1.2034	-1.9279	-0.776916	0.201936	-0.520513	0.190118	-0.0143873	0.915137	0.617627	0.156205	2.07023	-1.43103	0.120237	-1.37605	0.420829	-0.494307	-0.131027	0.0714228	0.551857	0.100711	-0.78822	1.4896
72	0.127944	-2.76545	0.555454	-0.25332	1.07956	0.228656	0.692647	0.466047	-0.591936	-0.512805	-0.37664	-1.1402	-1.31439	-0.448063	-0.148498	-0.588339	0.530276	-0.0226087	1.09549	0.871461	0.495849	1.99265	-0.979366	-0.104308	-0.77075	-0.358656	-0.108933	-0.226087	-0.423912	1.14482	0.490711	-0.391027	2.73462
74	0.242529	-2.47411	0.10996	-0.41158	1.25118	0.840117	1.40739	1.77118	1.55126	2.08205	-0.275415	-1.04873	0.0498418	0.481975	0.811343	0.766639	1.19261	-0.131027	2.28604	1.16794	1.24502	2.39909	-0.163913	-0.242529	0.070909	0.235849	1.76759	-1.10423	1.72853	1.30616	0.866836	0.00719366	3.94007
76	0.564189	-1.10782	-0.211185	0.413122	1.91095	1.263	2.56094	3.27723	3.67134	5.41118	0.244585	-0.31498	1.09446	1.30925	2.26857	2.37237	1.92328	-0.208102	3.56497	1.58877	2.09336	3.33632	0.68237	0.312411	0.856046	1.48601	3.64256	-0.985532	4.28126	1.28201	1.45415	-0.0539525	3.98837
78	0.276442	0.211699	-0.393596	0.561106	1.8981	1.3185	2.6781	3.81521	4.11632	6.68857	0.273359	-0.018498	0.968062	1.23012	2.39755	2.68118	1.96079	-0.28415	3.68007	1.60984	2.2511	3.24486	0.945967	0.362766	0.659762	1.64118	1.79225	0.376126	4.99394	0.404901	1.19107	-0.0364822	2.80913
80	-0.428023	-0.0369959	-0.128458	-0.648457	1.35498	1.00454	2.14834	3.23407	3.47454	5.26268	0.0518971	-0.667983	-0.200395	0.251264	1.78146	1.91608	1.43411	0.0169565	2.95043	1.43359	1.82102	2.68683	0.636125	0.0298023	-0.403359	1.36012	-1.27071	1.47213	3.94572	-0.528734	0.116126	0.186008	1.38632
82	-0.396679	-1.15869	0.969089	-1.06723	1.40842	0.286205	1.87292	1.96284	2.42889	1.45672	-0.13411	-1.2815	-1.18182	-0.610434	1.72545	0.718339	0.914623	0.745058	2.17146	1.40328	1.19158	2.64932	-0.16751	0.370988	-1.12889	1.70233	-0.91154	1.31541	1.66276	-0.221462	-0.672608	-0.0174703	0.328339
84	-0.128972	-2.17454	1.25529	-0.265652	1.53533	-0.738892	1.53328	0.7466	1.43257	-1.60162	-0.533873	-1.28561	-0.764584	-0.502529	1.88525	-0.323715	0.418774	0.818536	1.48755	1.12478	0.53079	2.46434	-1.34778	0.532845	-1.12375	2.04249	0.791817	-0.0220948	-0.335533	-0.15415	-0.621224	-0.440869	0.0303162
86	-0.208102	-2.80296	-0.163399	-0.0447035	0.725019	-1.13197	1.19004	0.379723	1.5081	-1.12324	-0.635098	-1.19672	0.409525	-0.0873516	1.80972	-0.141818	0.009249	-0.110988	1.20751	0.599643	0.245098	1.98597	-1.87909	-0.490711	-0.610948	1.33648	1.37039	-0.84988	-0.14747	-0.80569	-0.379723	-0.489683	0.00205537
88	-0.151067	-2.31071	-1.40174	-0.64075	-0.151067	-0.966006	1.1479	0.374584	2.28142	0.0349407	-0.464505	-1.51529	0.595019	-0.169051	1.6381	0.498932	-0.321146	-0.880196	1.16948	0.0698813	0.150039	1.86881	-1.93715	-1.42435	-0.266679	0.171106	0.845255	-0.213755	0.64075	-0.821619	-0.577035	-0.256403	-0.544149
90	0.324743	0.0267193	-1.0698	-0.722449	0.255889	-0.984504	1.2517	0.145415	2.36209	-0.184466	-0.649485	-1.71929	0.349407	-0.798497	1.58723	0.260513	-0.549801	-0.783082	0.969089	-0.187549	0.0113044	2.16786	-2.16683	-0.788734	-0.361225	0.336047	-0.810315	1.28664	0.549288	-0.237391	-1.05079	-0.54826	-1.37502
92	0.94905	3.12513	0.073992	0.516916	1.25632	-0.612489	1.42229	0.571382	1.94383	0.599129	-1.29435	-0.971658	0.618655	-1.24039	1.55023	0.420316	-0.275415	-0.0359683	1.13763	0.114585	0.226087	2.39087	-1.79379	0.459367	-0.278498	1.32209	-0.887904	3.14723	1.05387	0.523596	-1.26711	-1.42743	-2.06201
94	0.677746	4.13995	0.556481	1.54664	1.11707	-0.364822	1.46288	1.28407	2.38521	2.57687	-1.36988	-0.095573	0.921817	-0.941342	1.5564	1.01431	-0.134624	0.431106	1.55229	0.250237	0.357628	2.09284	-1.20031	0.346837	-0.735295	1.44541	0.620197	3.54802	2.5034	0.882765	-0.885848	-1.76553	-2.36466
96	-0.735809	1.98802	0.107905	1.05387	-0.073992	-1.13352	1.08624	1.0436	3.43343	3.56292	-0.632529	-0.322173	0.748655	-0.731698	1.56719	0.727588	-0.718853	-0.0287747	1.3334	-0.337075	-0.128972	1.48189	-1.53328	-0.931066	-2.04249	0.866323	0.190118	1.15869	3.6662	0.38743	-0.463991	-1.20494	-1.88936
98	-1.59134	-0.951105	-0.342213	-0.0375098	-0.781026	-1.59494	0.671066	0.691106	4.08754	3.70936	-0.28415	-0.966006	0.000513833	-0.77486	1.25016	0.725532	-1.22446	-0.547746	0.936718	-0.848339	-0.543122	1.08624	-1.96233	-1.69565	-2.45509	-0.0518971	-0.629959	-1.17771	4.20778	-0.0174703	-0.620197	-0.630987	-1.19261
100	-1.32363	-2.36415	-0.234308	-1.21933	-0.316521	-1.22703	0.987073	1.21676	5.06639	4.41434	-0.659248	-1.05027	-0.509722	-0.479406	1.43051	1.7234	-1.17	-0.621224	1.17308	-0.912568	-0.381264	1.33031	-1.72442	-1.44747	-2.33383	-0.322173	0.168537	-1.36217	4.94513	0.43162	-1.01379	-0.478379	-1.07186
102	-1.08419	-2.42838	-0.0816995	-1.21624	0.536442	-1.15047	1.81691	1.87087	6.28315	5.0628	-1.44747	-0.791817	-0.42494	-0.163399	2.52857	2.5296	-0.939801	-0.707034	1.57233	-0.886362	-0.00205533	2.2249	-1.44798	-0.803635	-2.916	0.899722	0.586284	-1.14225	5.76829	0.463991	-0.732726	-0.398735	-0.873002
104	-1.2296	-2.29478	-0.423399	0.386916	0.754821	-1.21984	2.17711	2.10877	6.85351	5.0777	-1.84055	-0.75739	0.0996836	-0.046245	3.24588	2.6745	-0.754821	-0.80569	1.63348	-0.794386	0.200909	2.74438	-1.28561	-0.560592	-2.90316	2.30762	0.266679	-1.28664	6.30627	-0.128458	-0.22249	-0.169565	-0.140276
106	-1.58466	-2.47205	-0.401818	1.0513	0.200909	-1.23063	1.66328	1.89502	6.519	5.03813	-1.4413	-1.18593	0.445493	-0.0652568	2.72486	2.42015	-0.923872	-0.977311	1.31233	-0.82573	-0.114585	2.17608	-1.43462	-0.976283	-2.19098	2.27268	0.366363	-1.21881	6.42651	-0.35249	-0.366363	-0.0734781	0.268221
108	-1.8534	-2.83841	0.451145	-0.09249	-0.235849	-1.3781	0.991184	1.33648	5.4605	4.83466	-0.962409	-1.81383	0.0015415	-0.231739	1.83079	2.0913	-1.42743	-1.18233	0.7949	-0.998892	-0.693675	1.60419	-1.92174	-1.39249	-1.8051	1.10269	1.09703	-1.27225	5.89264	-0.359683	-0.804663	-0.313952	-0.00513836
110	-1.43359	-2.73565	0.701896	-1.08162	-0.145415	-1.34624	0.683912	0.629959	4.51248	3.61893	-0.398221	-1.96952	-0.38743	-0.518458	1.523	1.73624	-1.75268	-1.10937	0.227628	-1.08367	-1.09909	1.63656	-2.31482	-1.39814	-1.30257	0.505098	1.8385	-0.67158	4.75912	-0.170079	-0.903832	-0.610948	-0.731185
112	-0.624307	-2.00241	-0.539525	-1.14996	-0.187035	-1.68794	0.134624	-0.269249	3.38873	2.04146	-0.196284	-2.08051	-0.58988	-1.31541	1.20186	1.12324	-2.1694	-1.32466	-0.582687	-1.50399	-1.5749	1.42332	-2.78498	-1.58518	-1.10474	0.635098	0.934662	0.812884	3.37075	-0.650513	-1.19415	-0.645888	-1.34881
114	-0.427509	-1.45672	-2.03221	-1.54099	-0.845769	-2.43197	-0.788734	-0.822133	1.64427	2.01936	-0.810315	-2.68889	-1.08265	-2.45253	0.139249	0.686995	-2.85332	-2.42683	-1.27482	-2.433	-2.12162	0.790275	-3.15494	-2.4628	-2.4926	0.40079	-1.53996	1.30616	2.4628	-1.72597	-1.93818	-0.46245	-0.666442
116	-0.977311	-1.25529	-2.64573	-2.30762	-1.59648	-2.1617	-1.41047	-0.415691	0.475296	3.10407	-1.01379	-3.1349	-1.0811	-2.53011	-0.844742	0.948536	-3.06861	-3.57628	-1.27636	-3.09276	-2.25573	0.111502	-2.76185	-3.33478	-4.10347	-0.162885	-1.97055	0.246126	2.37031	-1.31593	-2.16118	-0.36328	1.53071
118	-1.58004	-0.922844	-3.09533	-3.06039	-1.54561	-1.8349	-1.17257	0.169565	1.33597	3.8332	-0.875572	-3.41545	-0.564703	-1.3113	-0.547232	1.37553	-2.84664	-4.0079	-0.892014	-3.23612	-2.09233	-0.0447035	-2.52652	-3.13387	-4.34138	-0.378695	0.218893	-1.02099	3.17292	-0.542608	-1.90683	-0.421343	3.55059
120	-1.66996	-1.27379	-4.1194	-4.07675	-1.39197	-2.90984	-0.366877	0.0976283	3.61019	4.25608	-1.20083	-4.04849	-0.439841	-0.640236	0.766125	1.15715	-2.96687	-4.10707	-0.667983	-3.34043	-2.07897	0.404901	-3.16727	-2.72177	-4.04027	0.0580631	0.897667	-1.8462	4.6096	-0.81237	-1.47778	-0.355059	4.04335
122	-1.35292	-2.51521	-4.43181	-4.1307	-1.66482	-3.33992	0.293399	0.012332	5.24675	4.6024	-1.23937	-4.3013	-0.845769	-0.996836	1.80458	0.776402	-3.04754	-3.76845	-0.467074	-3.1796	-2.02707	0.967034	-3.41905	-2.83482	-2.70379	0.659762	0.0488141	-2.31893	5.4677	-1.18336	-1.39454	-0.298023	3.03984
124	-0.774347	-2.55067	-2.61644	-2.70173	-1.45672	-2.59537	0.20913	0.0565216	4.57877	4.23296	-0.865809	-3.12256	-0.646916	-1.12632	1.54407	0.821105	-2.85537	-2.98332	-0.36328	-2.72126	-1.8683	1.03229	-2.99513	-2.49055	-1.73316	0.868378	0.349407	-1.35087	4.63991	-1.30976	-1.63759	-0.531817	1.08984
126	0.38075	-1.04822	-0.253834	-1.47059	-1.27996	-2.43968	-0.528734	-0.120751	2.67604	3.09944	-0.683912	-1.77529	0.178814	-0.943398	0.518972	0.963951	-2.97407	-2.4294	-0.648457	-2.57841	-2.00344	0.321146	-2.86051	-2.13292	-3.49509	0.717311	0.932607	1.32055	3.14671	-0.740434	-1.29897	-0.722963	-0.558537
128	0.741461	-0.698813	0.405414	-1.39249	-1.40893	-2.70996	-0.660276	-0.307272	2.61079	2.27423	-1.01996	-1.98751	-0.0226087	-1.13249	0.436244	0.711145	-3.25411	-2.46075	-0.86324	-2.81735	-2.25881	0.116126	-3.03162	-2.59229	-5.05715	0.437272	0.851422	2.76545	2.94632	0.0703951	-1.25324	-0.519999	-0.758418
130	-0.807232	-2.85229	-0.693675	-1.9315	-0.985018	-2.82403	0.236363	-0.460395	4.25505	1.97877	-1.64529	-2.83225	-0.875572	-1.60778	1.45466	-0.0981421	-3.2983	-2.92525	-0.630473	-3.02596	-2.22284	1.33186	-3.13335	-2.79936	-4.50066	0.700868	0.133083	1.38375	3.70833	-0.0642291	-1.59802	-0.280039	0.0472726
132	-1.86521	-5.58845	-1.94794	-1.91095	-0.678774	-2.28142	0.758418	-0.0606323	4.85161	2.68683	-1.45569	-2.62106	-0.814426	-1.4151	1.83541	-0.253834	-2.9047	-2.63031	-0.13668	-2.74541	-1.81846	2.00189	-2.64624	-2.55889	-3.14415	1.08265	-0.33245	-0.42494	4.32134	-0.570355	-1.09498	-0.399248	0.438813
134	-0.741461	-6.46762	-1.91763	-0.940315	-0.733754	-1.08933	0.673635	1.11296	4.63734	4.95078	-0.540039	-1.5081	0.395651	-0.143359	1.42126	0.736323	-2.17146	-1.17873	0.572924	-1.85545	-1.11707	1.45569	-1.60213	-2.27217	-1.77838	0.992726	0.0971145	-0.712173	5.33513	-0.213241	0.0298023	-0.67826	-0.13411
136	0.459367	-4.87217	-0.83909	-0.0786165	-0.102253	-0.500987	1.04103	1.82514	5.00525	6.32118	-0.412608	-0.908971	1.3483	0.498418	1.50193	1.05182	-1.61755	-0.164427	1.26557	-1.12941	-0.524624	1.6011	-1.1479	-1.41304	-1.2368	0.978852	-0.492766	-0.581145	6.15778	0.442924	0.534386	-0.7466	-0.769722
138	-0.0868378	-2.40679	-0.10585	-0.10996	0.529762	-0.965492	1.26403	1.35446	4.53304	5.17122	-1.23114	-1.34316	0.633556	-0.476323	1.37091	0.0703951	-1.62012	-0.350434	1.22909	-1.22138	-0.615058	2.20845	-1.61138	-0.846283	-1.65506	0.871975	-1.98442	-1.26711	5.3341	0.5349	0.0364822	-0.674663	-0.815453
140	-0.588339	-0.691619	-0.372015	-0.656679	0.440869	-1.46854	0.99735	0.544149	3.0347	3.38462	-1.73316	-1.90838	-1.02047	-1.77118	0.671066	-0.798497	-1.77478	-0.881738	0.671066	-1.46186	-0.961382	2.396	-2.13087	-1.14944	-1.75782	0.422371	-1.86932	-1.18644	3.79157	0.401304	-0.563675	-0.891501	-0.795928
142	0.248181	0.217865	-0.623793	-1.28561	0.490711	-1.13557	1.04205	0.323715	2.3662	2.26446	-1.35703	-1.98853	-1.64529	-1.80304	0.588853	-0.807232	-1.46031	-1.0549	0.49328	-1.12529	-0.756876	2.6149	-1.96438	-0.947508	-1.11348	0.243043	-1.14328	0.623793	2.89545	0.446521	-0.758932	-1.29435	-0.599643
144	1.13917	0.73992	-0.0113044	-1.17411	0.794386	-0.40747	1.44695	0.773833	3.36972	2.47051	-0.249723	-1.82257	-0.193715	-0.819564	1.32774	-0.478893	-0.760987	-0.749169	0.985018	-0.526679	-0.135138	2.75774	-1.38992	-0.049328	-0.948022	0.914109	-1.49269	2.79628	3.45142	1.12016	-0.879169	-1.30976	-0.0179842
146	1.06363	0.898694	0.515375	-0.396165	0.512292	-0.478893	1.56257	0.980907	4.25711	3.49715	0.517944	-1.79431	1.52865	-0.255375	1.8015	-0.373557	-0.471185	-0.285177	1.32672	-0.256403	0.0909485	2.43146	-1.46597	0.207589	-1.49731	1.71158	-1.0883	3.76948	4.50786	1.59905	-1.13352	-0.968062	0.305217
148	0.429564	1.06363	0.174189	-0.322173	-0.000513833	-1.133	1.42178	0.564189	3.99248	3.93134	0.117668	-1.7049	1.66225	-0.31909	1.67664	-0.301106	-0.653082	-0.0904346	1.17616	-0.284664	-0.17162	2.15347	-2.14114	-0.4866	-1.75063	1.83027	0.326284	2.97869	4.64762	0.899722	-1.07391	-0.741975	0.422371
150	0.0441897	1.56616	-0.443438	-0.46656	0.150039	-1.17719	1.51221	0.243557	4.2309	4.06185	-0.180869	-1.41304	0.886876	-0.57241	1.70336	-0.241502	-0.717825	-0.311383	1.12067	-0.316521	-0.286719	2.31996	-2.44482	-1.2928	-1.49731	1.48292	0.906402	1.85288	4.61165	0.558023	-0.670552	-0.881224	0.89407
152	-0.503043	1.23628	-0.902805	-0.236877	0.457825	-1.47778	1.3	-0.23996	4.38402	3.64102	-0.366363	-1.90067	0.0529248	-1.16075	1.63707	-0.75071	-0.99324	-1.12632	0.779485	-0.572924	-0.532845	2.15142	-2.87027	-1.60162	-1.68229	0.906915	0.427509	1.23885	4.14047	0.759445	-1.03743	-1.16075	1.73933
154	-1.25016	-0.192687	-1.12889	-0.036996	0.287747	-2.48181	0.67826	-1.0102	3.72375	2.44944	-0.557509	-2.61284	-0.468616	-1.69925	1.14944	-1.46545	-1.48087	-1.84826	0.124861	-0.965492	-1.01328	1.62217	-3.55984	-1.53687	-2.93964	0.391027	-0.759959	0.498932	3.14106	0.286719	-1.77067	-1.19672	2.60822
156	-1.3	-1.22806	-0.911026	0.0667983	-0.0549801	-2.77624	0.479406	-1.20802	3.67031	1.47881	-0.101739	-2.34925	-0.928496	-1.63707	1.18439	-1.64324	-1.52557	-1.81691	0.00462447	-0.971658	-1.12992	1.39968	-3.50177	-1.31079	-3.84244	0.409525	-1.67407	-0.318063	2.8564	-0.024664	-1.48344	-1.0919	3.10664
158	-0.685967	-1.68126	-0.292371	-0.512292	0.0174703	-2.09798	1.0066	-0.833437	4.62039	1.27431	0.358656	-1.95616	-1.31695	-1.39814	2.08	-1.55897	-1.1181	-1.45774	0.341699	-0.523596	-0.808259	1.88012	-2.83122	-1.20905	-2.76083	1.0436	-1.89861	0.0241502	3.41493	0.108419	-0.905888	-1.14379	2.79936
160	0.326284	-2.16786	0.201423	-1.40533	0.131541	-1.61601	1.27379	-0.731698	4.69181	1.54715	0.674663	-2.0132	-1.00352	-1.65506	2.22798	-1.67253	-0.881738	-0.946994	0.381264	-0.127944	-0.621738	2.40011	-2.54964	-1.59905	-1.56616	1.2517	-2.25778	1.39454	3.62663	0.2266	-1.04051	-1.26608	1.78917
162	1.52557	-2.27936	0.41826	-1.30205	-0.00976286	-1.91865	0.801066	-0.852449	3.53466	2.07794	0.579604	-1.8128	-0.388458	-2.03221	1.17668	-1.50502	-0.99067	-0.278498	0.190632	-0.0626877	-0.674663	2.22284	-2.77059	-1.84312	-2.23055	0.802094	-1.58055	2.14577	3.34711	0.282608	-1.12581	-1.14893	0.73992
164	2.27525	-2.09849	0.779999	-0.652568	0.104308	-2.14371	0.766639	-0.493794	3.97399	3.41442	0.532331	-1.49269	0.267193	-1.4783	0.885848	-0.80158	-0.793872	0.210672	0.59245	0.0827271	-0.324743	1.97106	-2.68067	-1.21778	-3.42059	0.89818	0.44498	1.85237	4.24272	0.52822	-0.857587	-0.760473	0.582173
166	2.51316	-1.73933	1.0251	0.28415	0.0611461	-2.12008	1.05233	-0.043162	5.50521	4.77094	1.02356	-1.2815	1.0251	-0.773319	1.49166	-0.433161	-0.457312	0.442924	1.14276	0.25743	0.0786165	1.74138	-2.56865	-0.890987	-3.97707	1.39249	1.11245	1.61189	5.55454	1.20956	-0.389486	-0.574465	0.953161
168	2.45407	-1.31644	0.902805	1.34162	-0.157233	-1.98648	0.995295	-0.0390513	5.55505	4.49296	0.957271	-1.11759	1.21522	-1.22087	1.54458	-0.824188	-0.415691	0.502529	1.15047	0.318576	0.070909	1.62834	-2.67861	-1.27431	-3.62869	1.17	-0.323201	2.02707	5.2524	1.68178	-0.151581	-0.80569	1.12273
170	1.81743	-1.7085	0.659762	0.873003	0.0236363	-1.52197	0.964979	-0.313438	4.52122	2.95762	0.0421343	-1.68691	0.276442	-1.96438	0.897667	-1.56051	-0.377153	0.0303162	0.916164	0.3083	0.0113043	1.99881	-2.63699	-1.19466	-2.43711	0.0935176	-1.63861	2.19972	3.93545	1.23114	-0.780513	-0.946481	1.91249
172	0.688536	-2.6262	0.279011	-0.366877	0.227114	-1.35601	0.646402	-0.741975	3.08916	1.67767	-0.721422	-2.44842	-0.784109	-2.27782	0.120237	-2.01268	-0.448576	-0.903319	0.539011	0.0313438	-0.147984	1.91814	-2.86205	-0.820078	-1.73265	-0.563161	-1.69462	1.56	2.82968	0.299565	-1.38118	-0.926955	3.09584
174	-0.125889	-2.63751	-0.511778	-1.07494	0.0251778	-1.76861	0.0462449	-1.09344	2.08976	1.10834	-0.633556	-2.69249	-0.671066	-2.60462	-0.0621738	-1.91917	-0.815453	-1.67612	0.131027	-0.359169	-0.446007	1.26711	-3.34968	-1.10423	-2.12984	0.0467588	-1.52403	1.11245	2.38675	0.00411067	-1.40328	-1.03794	3.18782
176	0.0483003	-1.80458	-1.26506	-1.63964	-0.47992	-2.00241	-0.143873	-1.2183	2.17249	0.836007	-0.219921	-2.76853	-0.219921	-2.39703	0.106363	-1.71106	-1.11399	-1.89142	-0.0113044	-0.558023	-0.562647	1.00763	-3.51873	-2.01885	-2.433	0.402331	-1.48035	1.65814	2.43506	0.325256	-1.28561	-0.95316	2.42324
178	0.439327	-0.6166	-0.943911	-1.24553	-0.379723	-1.72083	0.314466	-0.799524	2.90521	1.59031	0.196284	-2.35284	-0.28826	-1.33494	0.247154	-1.16126	-0.793872	-1.14533	0.475296	-0.254861	-0.111502	1.5194	-3.17189	-2.12213	-2.04506	-0.0241502	-1.00814	2.58407	3.04498	0.564189	-0.927469	-0.55905	1.58826
180	-0.139763	0.83652	-0.115612	-0.307786	0.295454	-1.40739	0.981935	0.0596046	3.79723	3.41853	-0.0868378	-1.76091	-0.721422	-0.536956	0.595019	-0.179328	-0.20913	-0.00822133	1.31079	0.329367	0.532845	2.30608	-2.6226	-1.25941	-1.76759	-0.319604	0.0760473	2.59486	4.22422	0.2266	-0.59656	-0.254861	0.456284
182	-0.945967	1.60573	0.0210672	-0.312924	0.533359	-1.43565	1.06415	0.440869	3.72683	4.06236	-1.22857	-1.90838	-1.33648	-0.52822	0.575493	0.0596046	-0.0950591	0.346837	1.49834	0.424426	0.670552	2.4294	-2.48284	-0.82573	-1.81897	-0.527193	0.857074	1.51529	4.31414	-0.438814	-0.769722	-0.287233	-0.301106
184	-0.674149	1.38684	-0.330909	-0.754821	0.430592	-1.71723	0.776402	0.333992	3.03881	3.14003	-1.48703	-2.08308	-1.17873	-0.815967	0.276442	-0.440869	-0.272332	-0.0256917	1.23012	0.0775888	0.591936	2.02039	-2.67399	-0.965492	-2.35644	-0.309841	0.29083	0.851422	3.30241	-0.273359	-0.921817	-0.511264	0.170593
186	-0.283122	0.122292	-0.827271	-1.01225	0.271304	-2.06304	0.607351	0.0303161	2.70225	1.7162	-0.890987	-2.17917	-0.529248	-1.03435	0.234308	-0.938259	-0.576007	-0.910512	0.889959	-0.35249	0.45577	1.80047	-2.96636	-1.45158	-3.43395	0.012332	-1.14328	0.90486	2.46845	0.100197	-0.55905	-0.506126	1.55537
188	-1.09035	-2.7598	-1.49063	-0.770236	-0.0688536	-2.22901	0.450632	-0.468102	2.22952	0.149012	-0.729129	-2.7377	-0.70241	-1.16589	0.174189	-1.38529	-0.859129	-1.84004	0.439327	-0.723991	0.117154	1.83798	-3.34916	-1.9464	-3.47454	-0.150039	-1.97877	0.141304	1.68691	-0.323715	-0.472213	-0.225573	2.87233
190	-2.02502	-5.61877	-1.63656	-0.0457311	-0.369446	-2.17762	0.255889	-0.838062	1.62525	-0.583201	-1.00917	-3.03778	-0.947508	-1.3	0.0755335	-1.53276	-0.883793	-1.99316	0.140276	-0.799011	-0.036996	1.7532	-3.58296	-1.78249	-2.95762	-0.0868378	-1.64786	-1.22138	1.17257	-0.78154	-0.725019	-0.106363	3.15237
192	-1.49937	-5.00114	-0.930552	-0.163913	-0.549801	-1.98956	0.212727	-0.703438	1.7532	0.275928	-1.07597	-3.05011	-0.225059	-1.49063	0.132055	-1.24913	-0.769208	-1.5677	0.216838	-0.744544	0.163913	1.47727	-3.55213	-1.52917	-3.11537	0.127944	-1.99419	-0.463991	1.54355	-1.10423	-0.92233	-0.413122	2.14988
194	-0.407984	-1.71774	-0.359683	-1.54664	-0.351976	-1.76399	0.766639	-0.135138	2.64675	2.03992	-1.12375	-3.29881	-0.070909	-1.52763	0.606837	-0.899722	-0.547746	-1.42897	0.756876	-0.857588	0.590908	1.95	-3.29727	-1.8647	-3.21916	0.130514	-2.83019	2.2696	2.51573	-1.49731	-1.34984	-0.740434	1.20186
196	-0.328853	-0.503556	-0.737351	-2.90264	0.357114	-1.96644	1.63964	0.282608	3.43652	3.06039	-1.61652	-3.6549	-1.13043	-1.30359	1.3149	-0.717825	-0.393082	-2.00909	1.40122	-1.01225	0.95984	3.14003	-3.1832	-2.00344	-3.60968	0.576521	-1.6828	3.39335	3.33272	-1.53893	-1.35755	-0.604268	1.91095
198	-0.718853	-1.43873	-1.40944	-2.85023	0.422885	-2.3477	1.70182	0.183438	3.51051	2.61695	-2.18071	-3.90873	-1.33494	-1.37553	1.42229	-0.796441	-0.551343	-2.6781	1.44387	-1.09498	0.917192	3.16984	-3.35276	-1.8164	-4.11478	1.18952	-0.323715	2.51162	3.38359	-0.703951	-1.16897	-0.440355	2.93245
200	-0.75739	-1.68589	-1.43771	-0.968062	0.0560078	-1.89964	1.28458	0.172134	3.25308	2.27217	-2.64367	-3.40774	0.00102767	-1.83952	1.05233	-0.738892	-0.488141	-2.28142	1.30359	-0.752252	0.847825	2.36004	-3.18577	-1.50399	-3.33169	1.25067	-0.702924	1.75628	3.13798	0.493794	-1.46597	-0.634584	2.26395
202	-1.14842	-2.49774	-0.567786	1.04616	0.56162	-0.721422	1.68023	0.88739	3.79055	3.44371	-1.9613	-2.30557	1.36166	-1.86316	1.14585	-0.0791303	0.132055	-1.10063	1.80612	0.189604	1.35446	2.66525	-2.34719	-0.725532	-1.65352	0.98399	-1.05541	1.09806	3.863	1.34881	-1.58363	-0.814939	0.998378
204	-1.69308	-4.24272	0.412094	1.57079	1.25067	-0.172134	2.4479	1.41921	4.58185	4.19956	-0.206561	-1.71004	1.66328	-1.34778	1.76656	0.532331	0.534386	-0.303162	2.31482	0.755849	1.80612	3.59324	-1.85802	-0.280553	-0.650513	0.492766	-0.820592	0.156205	4.62142	1.68486	-1.21933	-0.714742	0.157747
206	-1.71826	-4.47189	0.382806	0.372529	0.865809	-1.03332	2.19715	0.758418	3.90051	2.98126	0.104308	-1.98648	1.06929	-1.21008	1.81589	0.0703951	0.00770746	-0.434703	1.86984	0.205019	1.22652	3.48225	-2.61644	-1.06877	-1.45877	-0.0662845	-1.45415	-0.890473	3.73505	1.03692	-0.916165	-0.574465	-0.40747
208	-1.80612	-3.70422	-0.420316	-1.74292	-0.217351	-2.41347	1.10834	-0.286205	2.7711	1.71363	-0.729129	-3.12308	0.611975	-1.86059	1.2368	-1.00814	-0.95984	-1.30359	0.900236	-0.881738	0.16751	2.41604	-3.73659	-2.18174	-3.40414	0.040079	-2.19612	-1.54458	2.55992	-0.10585	-1.32055	-0.749169	-0.0996836
210	-1.9279	-3.17754	-1.25889	-2.52189	-0.718339	-3.11691	0.476323	-0.665928	2.75312	1.40636	-1.00711	-4.29102	0.494821	-2.7264	1.06929	-1.30205	-1.54818	-2.07383	0.318577	-1.61857	-0.316007	1.79482	-4.11837	-2.4181	-4.54588	0.487628	-1.04411	-1.12941	2.39652	-0.236363	-2.38624	-1.11605	0.873516
212	-1.62577	-2.93039	-1.76091	-1.75628	-0.38743	-3.33735	0.746086	-0.475296	3.42573	1.78506	-0.701896	-4.58185	0.0827271	-2.91806	1.60008	-0.900236	-1.63348	-2.39755	0.371501	-1.80664	-0.147984	2.14782	-4.1081	-2.07126	-4.71288	0.992212	-0.0118182	-0.425968	2.88774	0.458339	-3.10664	-1.15921	1.73778
214	-1.23114	-3.19245	-1.66174	-1.50913	-0.132055	-3.4992	1.1664	-0.206561	4.15126	2.82403	-0.519999	-4.43387	-0.043162	-2.47565	2.10826	-0.787192	-1.57336	-2.58253	0.712686	-1.82462	0.0287746	2.52395	-4.23964	-2.05379	-4.70774	1.5045	-1.51324	-0.354031	3.76331	0.669011	-3.03316	-0.961896	1.95976
216	-0.974228	-3.16624	-1.43771	-2.47154	-0.410553	-3.09584	1.41253	0.256917	5.1147	4.19288	-0.78822	-4.39738	0.159288	-2.35952	2.3477	-0.480434	-1.50707	-2.69197	1.14636	-1.92174	0.0441899	2.60411	-4.03924	-2.52395	-4.51711	1.45672	-2.82814	-0.612489	4.9256	-0.0621738	-3.10664	-0.962923	1.56103
218	-0.752766	-2.00703	-1.4968	-3.25822	-0.589367	-2.59075	2.00755	1.07699	6.84015	6.00979	-1.14122	-4.4945	-0.0642291	-2.18893	2.90316	0.675691	-1.37707	-2.60051	1.74601	-2.00549	0.281581	3.05679	-3.40414	-2.66268	-4.66766	1.52865	-1.45826	-0.327312	6.59505	-0.914109	-3.36715	-1.06775	0.797983
220	-0.687509	-0.425968	-1.86213	-2.90059	-0.824702	-2.94067	2.12213	1.3113	7.72959	7.02513	-1.5379	-4.53304	0.0683398	-1.71312	2.84509	1.40636	-1.62525	-2.6298	1.77529	-2.25264	0.285691	2.92936	-3.26798	-2.92885	-5.51446	1.70901	0.165968	0.475809	7.56979	-0.586284	-3.00695	-1.07443	-0.161857
222	-0.869406	-0.588853	-2.43506	-2.15656	-1.28304	-3.28339	1.48549	0.914109	6.84374	6.33659	-1.6196	-4.45647	0.426482	-1.91814	2.10363	1.02612	-2.01988	-3.00387	1.2666	-2.61901	-0.0113044	2.11802	-3.55521	-3.94675	-5.63675	1.59956	-1.11399	0.653596	6.9722	0.490711	-2.56557	-0.93569	-0.0385375
224	-1.34984	-3.34197	-2.51881	-1.54201	-0.807232	-2.92474	1.73367	0.89818	6.30062	5.62031	-1.58415	-4.45134	-0.228656	-2.51264	2.49672	0.614544	-1.76091	-3.34968	1.3447	-2.4849	0.221976	2.59743	-3.40877	-3.92312	-4.68102	1.71106	-3.14826	-0.130514	6.35714	1.01893	-2.7377	-0.829841	1.67715
226	-2.14834	-5.66758	-2.17146	-1.51786	0.107391	-2.95762	2.54964	1.14122	6.76102	5.84023	-2.06972	-4.42513	-0.823675	-2.43968	3.50126	0.871975	-1.42743	-3.51102	1.75628	-2.12984	0.586284	3.74071	-3.36304	-2.76031	-4.76118	1.78197	-1.86213	-0.905888	6.52363	0.864267	-2.71766	-1.03743	3.06758
228	-3.31833	-5.61825	-2.74644	-2.67245	0.159802	-3.63588	2.64059	1.19055	7.19212	6.37924	-2.74901	-4.72932	-0.693675	-1.81075	3.60814	1.56103	-1.59751	-3.67031	1.73984	-2.3179	0.304189	3.84758	-3.81059	-2.40063	-5.91782	1.16075	0.750196	-1.63502	6.88536	-0.206561	-2.33589	-1.08213	3.47711
230	-4.37118	-4.90505	-3.67802	-3.69549	-0.125889	-3.85015	2.39909	1.05182	7.47576	6.23691	-2.91138	-5.63212	-0.919761	-1.70284	3.34403	1.87857	-1.80099	-3.67442	1.56873	-2.60411	-0.0596047	3.55059	-4.08138	-2.51162	-5.82173	0.694702	1.21984	-2.88569	7.08422	-1.49731	-2.61181	-0.816995	3.76074
232	-3.74893	-3.84039	-2.95762	-3.36355	-0.364822	-3.5141	2.00241	0.562133	7.22706	4.65173	-2.44842	-5.77343	-0.599129	-2.5743	3.2428	1.15612	-1.95359	-3.22996	1.27585	-2.65549	-0.375612	2.97458	-4.11734	-2.37956	-5.20462	1.16435	0.0534386	-2.75517	6.22663	-1.45723	-3.41442	-0.914623	3.1277
234	-1.70438	-2.31071	-1.66071	-2.33691	-0.743517	-3.11845	1.09909	-0.192687	5.42711	2.36055	-1.59905	-4.66561	0.193715	-3.68829	2.59948	-0.146956	-2.29067	-2.87541	0.546718	-2.72177	-0.947508	2.01166	-4.17078	-2.69146	-5.54272	1.02561	-2.19355	-0.353517	3.95086	-0.496363	-3.64976	-1.22292	1.61446
236	-0.590908	-1.393	-1.85494	-1.27893	-0.793872	-3.12462	0.628418	-0.668497	3.58758	1.44438	-0.701382	-3.77719	-0.395652	-3.99146	1.77735	-0.75071	-2.53885	-3.18628	-0.0210672	-2.70019	-1.26454	1.98288	-4.37272	-3.28031	-5.59718	-0.0457311	-4.09782	2.02142	2.44893	-0.405414	-3.15134	-1.2481	0.701896
238	-1.12016	-0.821105	-2.54964	-0.820592	-0.881224	-3.85991	0.589367	-1.0102	3.08403	1.46494	-0.714742	-3.72632	-1.33751	-3.24794	1.45209	-0.38075	-2.68426	-3.72529	-0.316521	-2.75671	-1.43771	2.17917	-5.03043	-3.46683	-5.32126	-0.105336	-2.38881	2.86	2.3143	-1.4932	-2.57019	-1.07545	0.714742
240	-2.38727	-0.833951	-2.41245	-1.49114	-1.08162	-4.03821	0.683398	-1.07699	3.67339	1.56462	-1.7234	-4.00687	-0.977824	-2.28347	1.85134	0.207075	-2.62312	-3.86557	-0.32577	-2.66063	-1.43873	1.96387	-5.26782	-3.046	-4.8141	1.12273	0.940829	2.14114	2.67656	-1.98134	-2.46383	-0.827271	1.23885
242	-3.03932	-2.21	-1.55794	-2.23466	-0.402845	-3.11177	1.61498	-0.439327	5.20616	2.5034	-2.82505	-4.36861	-0.708062	-1.75371	3.07324	0.687509	-1.98083	-3.35944	0.438814	-2.0168	-0.717825	2.81581	-4.43335	-2.22952	-3.98889	2.10466	1.66842	0.739406	3.74379	-1.54047	-2.76545	-0.57241	2.03838
244	-2.21616	-3.6811	-0.590394	-1.77016	0.536442	-2.21102	2.53474	0.450632	6.00003	3.85375	-3.1092	-4.28126	-0.920275	-1.44695	3.79157	1.21573	-1.08213	-2.4366	1.39249	-1.1515	0.250237	3.96474	-3.39387	-1.42743	-3.5732	2.37031	0.699327	-0.100711	4.71339	-1.06518	-2.60668	-0.26411	3.16881
246	-1.23628	-4.47549	-0.710117	-1.22035	0.343754	-2.0543	2.34051	0.860671	5.06742	4.74525	-1.92379	-3.90565	-0.251264	-1.33288	3.10304	1.62782	-0.74403	-2.08668	1.61857	-0.734781	0.613517	3.72015	-3.0383	-1.62063	-3.45399	2.1915	-0.178814	-0.296996	4.91379	-0.428023	-2.10055	0.0231225	4.35268
248	-1.09035	-5.22106	-2.06047	-2.17608	-0.455256	-2.73462	1.63039	0.708576	4.34446	5.02529	-0.593477	-4.17335	0.156719	-1.38889	2.14268	1.46648	-1.18798	-2.79834	1.24759	-1.10166	0.166482	2.62004	-3.50177	-2.55067	-3.84501	1.64478	-0.573438	-0.243043	4.89889	-0.277984	-2.20332	0.046245	5.10082
250	-1.27174	-5.5679	-3.47916	-3.76742	-0.331422	-3.38667	1.34419	0.397193	4.7026	4.62964	-0.933121	-4.90813	-0.159802	-1.45569	2.07229	1.00968	-1.63039	-3.59529	0.919761	-1.67201	-0.404387	2.13189	-4.12968	-2.51419	-4.70671	1.69925	-0.433161	-0.129486	4.76169	-1.23988	-2.73102	-0.177786	5.57149
252	-1.47316	-5.3305	-3.96474	-4.04387	-0.205533	-3.63897	1.02407	-0.255889	4.02845	2.76185	-1.82668	-5.35363	-0.00667983	-1.66585	2.07332	0.422371	-1.91403	-4.01252	0.3566	-2.03427	-0.877627	2.08976	-4.77145	-2.29015	-5.4641	2.26189	-0.563161	-0.25743	3.33375	-1.91608	-3.00901	-0.369446	6.10793
254	-1.63039	-5.23802	-3.41802	-2.97818	-1.25632	-4.11786	0.286719	-1.05284	2.396	0.662331	-1.87087	-5.62288	0.108933	-2.02553	1.45055	-0.196798	-2.30351	-4.1862	-0.436244	-2.40525	-1.45569	1.62217	-5.51343	-3.15031	-6.01596	1.77889	-1.46956	-0.488141	1.43565	-0.888417	-3.02596	-0.500473	6.5375
256	-1.5081	-4.63272	-2.46126	-2.13703	-1.78095	-4.32082	0.244585	-1.11605	1.92482	0.205533	-1.66893	-5.39217	-0.468102	-2.19304	1.2666	-0.132569	-2.2696	-3.70011	-0.4866	-2.32818	-1.47162	1.69154	-5.61311	-3.87019	-5.77857	0.776402	-1.67047	-0.0632014	1.04668	0.449604	-2.79011	-0.587825	6.17884
258	-1.37502	-3.69652	-1.49012	-2.41758	-0.881224	-3.84707	0.866837	-0.661817	1.91351	0.683398	-1.4079	-4.69284	-0.896639	-2.11237	1.63964	0.39411	-1.7234	-3.03162	0.0416205	-1.69925	-0.868378	2.6149	-5.06228	-3.35841	-4.87833	0.487628	-0.883279	0.467074	1.47213	0.825216	-2.50083	-0.662845	5.55967
260	-1.57644	-3.86762	-0.638181	-2.75774	0.225059	-3.30909	1.34933	-0.341699	2.11596	1.46494	-0.806204	-4.31568	-0.250237	-2.5034	2.07743	0.549288	-1.19929	-2.70533	0.428537	-1.16794	-0.364822	3.30754	-4.58699	-2.36723	-4.46059	0.742489	-1.57233	0.280553	2.02604	1.18901	-2.58869	-1.01944	4.98572
262	-1.43668	-4.01869	0.355573	-1.81948	1.1479	-2.57019	2.23928	0.109446	4.18003	2.7413	-0.487628	-3.74687	1.00454	-2.85743	3.27517	0.62739	-0.472726	-2.21513	1.10166	-0.4383	0.29083	4.15331	-3.90667	-1.31952	-3.86814	1.86881	-2.47154	0.696244	3.58347	1.53585	-2.17917	-1.51684	4.13173
264	-1.01431	-2.77675	1.01688	-0.260513	1.84055	-1.74344	3.18833	0.617627	6.21224	3.88252	-0.763042	-3.01723	1.34778	-2.32869	4.44209	0.992726	0.342213	-1.5677	1.90529	0.52822	1.16691	4.95541	-3.23458	-0.355573	-2.70225	3.25102	-0.95984	1.94846	5.09209	1.42589	-1.42075	-1.71877	3.72786
266	-0.893042	-0.851935	1.06929	1.27071	2.36055	-1.22087	3.36972	1.09446	5.73181	4.9513	-0.809287	-2.57944	0.864267	-1.75423	4.29667	1.47213	0.949564	-0.736837	2.27885	1.25529	1.84929	5.09466	-2.87849	0.412608	-2.43146	3.67031	0.68905	2.69197	5.36956	1.68075	-1.47419	-1.64067	3.8075
268	-0.985018	0.321146	1.49782	2.49877	2.89905	-0.828813	3.45758	1.82925	4.7658	6.2256	-0.0493279	-2.07229	1.68383	-1.49217	4.03513	2.00909	1.50913	0.313438	2.61336	1.73419	2.41399	5.30584	-2.39395	0.941856	-3.05628	4.07367	0.623793	2.43762	5.49956	2.29375	-1.71826	-1.50142	3.7777
270	-1.25581	-0.575493	1.90786	1.80047	2.84355	-0.772805	3.69703	2.38932	5.39833	7.3139	0.687509	-2.18996	3.18628	-1.04668	4.40509	2.55529	1.70233	0.672608	3.00079	1.85442	2.69762	5.54683	-2.07178	0.618655	-3.25462	4.31671	-0.179842	1.27893	6.22869	2.60462	-1.60521	-1.3262	3.99505
272	-1.29794	-2.96996	1.21213	-0.607351	2.3847	-1.01379	3.88355	2.39189	6.3371	7.60216	0.521027	-3.54031	3.0943	-0.967034	4.65995	2.73616	1.52711	-0.09249	3.12102	1.53842	2.54758	5.6239	-2.22695	-0.086324	-2.72537	3.80237	-0.67158	-0.0488141	6.62125	2.05842	-1.94794	-1.10937	5.14912
274	-0.60324	-5.0443	-0.0303162	-1.89964	2.06098	-1.20545	3.78489	1.84363	6.37359	5.81402	0.240988	-4.65379	2.09541	-1.4747	4.61987	2.11699	1.25427	-1.24399	2.79371	1.13352	2.05944	5.50572	-2.63751	-0.567786	-2.24853	3.51513	-0.67158	-0.509209	5.68454	1.11245	-2.44328	-1.25684	6.93212
276	0.349407	-6.24975	-0.473754	-1.39968	2.10055	-1.27585	3.5141	1.32415	6.33351	3.47094	0.811343	-4.62039	1.93407	-1.75114	4.57671	1.41561	1.16589	-1.73059	2.48644	1.13352	1.77786	5.02426	-2.98023	-0.359683	-2.41707	3.78644	-0.593477	-0.202964	4.60857	1.49371	-2.35747	-1.67664	8.47208
278	0.730671	-6.0956	-0.496363	-0.551857	2.24442	-1.65917	2.9566	0.852449	5.28426	2.41656	1.09909	-4.12711	2.28245	-1.76913	3.82549	0.983477	1.23269	-1.44233	2.18019	1.32929	1.65557	4.34395	-3.45656	0.235336	-3.2649	3.71244	-0.354031	0.355059	3.6513	2.2326	-1.95	-1.68332	9.19864
280	0.498418	-3.91438	-0.323201	0.0467588	2.14423	-1.90427	2.47051	0.420829	3.78798	1.69	0.512292	-3.33015	1.94229	-2.02964	2.8564	0.564189	1.30257	-0.885334	1.82	1.5451	1.67253	4.16616	-3.69652	0.218379	-3.60197	3.03521	-0.126917	1.18747	2.53371	1.85905	-1.47008	-1.46854	8.74184
282	0.526165	-0.130514	0.561106	0.537983	2.0949	-1.10885	2.8826	0.555454	4.00687	1.30308	0.407984	-2.37853	1.54099	-2.37956	3.25822	0.252806	1.65763	-0.0534387	2.00498	2.05739	2.08565	4.91944	-3.04446	-0.0714228	-2.35798	2.5034	-1.38221	2.75312	2.37699	1.63039	-1.24553	-1.66739	6.82114
284	1.18284	3.51565	1.36782	0.68905	2.58355	-0.0847825	3.94418	1.24348	4.84082	2.28039	1.05593	-1.67047	1.46751	-2.44482	4.44517	0.366877	2.36363	0.815453	2.73668	2.79834	2.71304	6.25849	-2.06818	0.202964	-0.751224	2.36363	-3.72118	4.54074	3.2243	1.84261	-1.3519	-2.13138	5.04533
286	1.75885	4.5613	1.3781	-0.0729643	3.46683	-0.119209	4.66869	1.77427	5.51189	3.69343	1.41612	-1.68897	1.60213	-2.04197	4.99703	1.0585	2.89083	0.942884	3.39644	3.29881	3.27055	7.06469	-1.77016	0.961896	-1.00454	2.73308	-3.22276	5.25857	4.21446	1.9613	-1.44952	-2.16067	5.79912
288	2.05019	3.11948	0.923358	-0.680829	3.26387	-1.00095	3.88766	1.44695	5.4528	3.49972	0.916678	-2.45561	2.38316	-1.35241	4.19339	1.34316	2.63442	0.451145	3.17086	2.99513	3.11383	5.84691	-2.44687	0.927983	-2.84715	3.28802	0.770236	4.78173	4.02434	2.35747	-1.44901	-1.61549	8.19975
290	2.43351	1.24707	1.38786	0.391541	2.60359	-1.16229	2.95557	1.34213	4.70517	3.31577	0.436758	-2.58664	2.50031	-0.691619	3.12924	1.25581	2.49312	0.236877	2.83071	2.78857	2.93039	4.47857	-2.76339	0.607865	-3.04703	3.32604	3.3543	3.8332	3.48739	2.67707	-1.40071	-1.08316	10.0259
292	2.67861	-0.217865	2.43403	1.97723	3.13798	-0.216324	3.34248	2.29889	4.08138	5.08232	0.692647	-1.49012	1.45466	0.0637153	2.86822	1.94846	3.20118	0.377154	3.343	3.32604	3.53671	5.03762	-1.96849	1.32826	-1.8128	2.83225	2.37134	3.55881	4.11478	2.31996	-0.902291	-0.86992	10.8316
294	1.66431	-3.02699	1.72031	1.62063	3.32193	-0.0904346	3.36201	2.46588	2.80656	5.2822	0.810315	-1.42075	0.861184	0.135138	2.45818	2.27268	3.26695	-0.149012	3.28494	3.12873	3.47762	5.55197	-1.78608	1.24502	-2.44687	2.28604	0.419288	2.99873	3.87841	1.83336	-0.570355	-0.560078	11.9014
296	-0.153636	-7.04876	0.027747	-0.304703	2.0543	-1.17154	2.21308	1.14482	1.40944	2.01371	0.393596	-2.98023	0.700355	-0.949564	1.56976	1.02612	2.24494	-1.29589	2.02347	2.06972	2.37802	4.50683	-2.77264	-0.398734	-3.92157	1.75731	-0.860157	0.827271	1.82411	1.45261	-1.2111	-0.0405928	13.6099
298	-1.15099	-8.66631	-0.285177	-0.912054	1.28767	-1.48138	1.56308	0.312411	1.0883	-0.696758	0.186008	-3.48276	0.366363	-1.90272	1.3262	-0.00667983	1.80921	-1.67407	1.2332	1.84158	1.89142	3.67134	-3.25154	-0.863753	-3.67134	1.41921	-1.20854	-1.21162	0.214782	1.25684	-1.31747	0.150039	14.4978
300	-1.27533	-7.58264	0.506126	0.16494	2.28347	-0.577548	2.50802	1.04411	2.73	0.456798	0.513319	-2.90162	0.503556	-1.84415	2.563	0.489169	2.58715	-1.1479	2.0132	2.71972	2.63545	4.56078	-2.56249	0.460908	-2.37031	2.1879	-0.737351	-1.60521	1.2183	1.44182	-0.575493	-0.00822133	14.616
302	-0.953674	-5.07667	1.58518	1.09755	3.39952	0.377154	3.79517	2.23004	5.38497	3.25205	1.0179	-2.48541	1.02715	-1.14893	4.24169	1.53533	3.54905	-0.336561	3.26027	3.77924	3.67699	5.78422	-1.57079	1.72288	-1.27328	3.6215	-0.0919761	-0.25332	3.68059	1.75782	-0.396165	-0.117154	14.5317
304	-0.597074	-2.15656	2.36363	1.2332	3.66209	0.689564	4.20572	2.76699	6.29394	4.36912	1.19261	-2.08873	1.49114	-0.682884	4.7879	2.1617	4.08343	0.262569	3.71964	4.29513	4.19493	6.14699	-1.09446	2.25316	-0.959326	4.10296	0.976283	1.70644	4.79458	1.90581	-0.459367	-0.242015	14.2568
306	-0.477865	-1.22858	2.03632	0.99735	3.80185	0.804149	4.23142	2.65241	5.55145	3.66055	0.689564	-1.88988	1.49731	-0.738892	4.27149	2.11956	4.34086	0.526679	3.65335	4.27406	4.23347	6.41161	-0.991698	1.8647	-1.09241	3.47557	1.27122	2.6226	4.30027	1.65557	-0.27747	-0.359169	14.1561
308	-0.550315	-2.18379	1.33854	0.914109	3.77873	0.765611	4.05825	2.0913	4.72675	2.26857	0.0950591	-2.15964	0.872489	-0.740947	3.42059	1.52249	4.28537	0.784623	3.32861	4.14201	4.05517	6.62177	-1.2445	0.731698	-0.625335	2.70328	-1.07031	2.11031	3.35276	1.77016	-0.426995	-0.426481	13.9125
310	-0.231225	-2.26549	1.54355	1.09755	3.88766	0.49328	3.73146	2.00395	4.29719	2.1545	0.29083	-2.24905	1.1181	-0.507153	2.89288	1.62166	4.2458	1.17154	3.17035	4.31671	4.0413	6.25335	-1.43308	0.837034	-0.0292885	2.51778	-2.60462	1.32518	3.08557	2.82351	-0.783082	-0.725019	13.5405
312	0.669525	-0.642805	1.65352	0.831382	3.68829	0.544149	3.12924	2.53011	3.32399	3.12205	0.725532	-1.84106	2.08976	-0.331936	2.46177	2.48541	4.20932	1.34316	3.1909	4.41845	3.96936	5.22003	-1.17103	1.65814	-0.695216	2.48284	-0.098656	1.35087	2.97561	2.97561	-0.902291	-1.06569	13.9752
314	0.868378	0.0919762	0.897667	-0.0590908	2.2064	-0.0118182	1.82719	2.04095	1.23063	2.89699	0.566758	-2.14782	1.33494	-0.254347	1.24296	2.2249	3.30549	0.363794	2.4443	3.49304	3.03675	3.67648	-1.78814	0.826244	-2.40577	1.67715	1.96695	1.4264	1.7645	1.50759	-0.947508	-0.889959	16.2695
316	0.611975	-0.903833	0.463477	-0.819564	0.932607	-1.28099	0.992212	0.916678	0.0421343	1.86162	0.0138735	-3.26798	-0.595533	-0.338102	0.372015	1.1962	2.1581	-1.40533	1.47676	2.17197	1.93972	2.96944	-3.16162	-0.660789	-3.49304	0.992726	1.08008	1.68691	0.642291	0.385375	-1.26197	-0.465019	19.5195
318	0.78154	-1.70336	0.670038	-1.72442	1.51992	-1.53893	1.71106	0.827785	1.35138	1.38118	-0.569841	-3.83063	-0.84988	-0.668497	1.19312	1.07802	2.12676	-2.4181	1.58877	1.82051	1.90067	4.01612	-3.42573	-0.703951	-3.54237	1.53893	0.514861	2.77316	1.19929	0.236877	-1.76039	-0.443952	21.5188
320	1.09241	-0.777429	0.886362	-1.49988	3.02545	-0.841659	3.02185	1.4634	3.41905	1.5564	-0.260513	-3.22944	0.669525	-1.21624	2.68375	1.35755	2.92268	-1.97672	2.44071	2.55324	2.75671	5.71794	-2.6596	0.550829	-3.08814	2.38419	0.683398	4.16821	2.58098	0.54158	-1.7645	-0.824702	21.4438
322	1.36063	1.50039	0.910512	1.23423	3.34916	-0.299565	3.44268	1.86984	4.02434	2.12624	0.738378	-1.8349	2.05842	-1.82719	3.3913	1.01893	3.5141	-0.306245	2.93296	3.58861	3.45347	6.06734	-2.0949	1.19415	-2.20178	2.77316	0.363794	5.63469	3.18114	1.50348	-1.00865	-1.39608	19.5883
324	1.15201	2.18328	1.1998	2.90932	2.53268	0.086324	2.91395	2.15604	3.50434	2.95454	1.18027	-1.18027	2.43917	-1.92585	3.20632	0.801066	3.6626	1.0066	2.8564	4.16102	3.51513	5.08489	-1.88166	0.701896	-1.31901	3.02031	0.364822	6.21327	3.20169	2.49312	-0.676718	-1.73265	18.4605
326	0.60992	0.432134	1.43462	1.20494	1.87395	0.0436758	1.97826	1.97672	1.87189	2.78292	1.02767	-2.25984	1.82873	-1.71569	2.15347	0.758418	3.26541	0.609406	2.18276	3.86043	2.89648	4.20316	-2.10569	0.0179842	-1.65557	2.70944	0.471699	5.2041	2.17197	1.79944	-1.6494	-1.63553	19.6243
328	0.342213	-2.05019	0.970631	-0.838062	1.66328	-0.788734	1.20854	1.07545	-0.316007	0.913082	0.861698	-3.62201	0.667469	-1.91763	0.917192	0.115099	2.44739	-0.510236	1.15407	2.97458	2.03015	3.95086	-2.91395	-0.565216	-3.00644	1.60778	-1.05695	3.42573	0.00565213	0.529762	-2.6	-1.48909	21.525
330	0.541066	-3.2428	0.870433	-0.569327	2.08462	-1.17822	1.5934	0.711659	-0.055494	-0.153122	0.863753	-3.33067	-0.0606323	-2.19355	1.25118	-0.261027	2.33794	-0.574466	1.14842	2.7896	2.06355	4.68308	-3.23201	-0.451146	-3.41545	1.31336	-2.96893	2.30454	-0.424426	0.681343	-2.3477	-1.40688	22.5773
332	0.975769	-2.2696	1.61189	0.868378	2.62826	-0.591936	2.433	1.14944	1.82719	0.175731	0.846283	-2.01063	0.134624	-1.80921	2.46691	0.180355	2.94889	0.344268	1.93561	3.37434	2.69454	5.47952	-2.85023	0.37407	-2.64778	2.30557	-1.87138	2.31225	0.793872	1.5415	-1.38016	-1.42897	22.8065
334	1.18233	-1.82925	1.91146	1.00763	2.61181	-0.236877	2.67296	1.67201	3.07683	1.03846	0.991698	-1.79482	0.741975	-0.939287	2.89237	0.877113	3.31063	0.485572	2.39241	3.65078	3.05833	5.44509	-2.68529	0.729643	-2.15091	2.8528	0.121265	2.07434	2.15193	2.14936	-0.578576	-1.62885	23.8855
336	1.12941	-3.20015	1.45312	0.036996	2.51367	-0.225059	3.13747	2.59332	4.76169	3.61482	1.34367	-2.54656	0.949564	-0.763042	3.15082	1.50039	3.53928	-0.311383	3.07324	3.64102	3.64924	5.52473	-2.35387	0.496877	-2.24751	2.75826	-1.46237	1.06158	4.50169	1.81537	-0.573438	-1.61292	26.0966
338	0.776402	-3.86608	0.675177	-0.307786	2.95094	0.211185	4.01252	3.7628	6.60533	6.21944	1.28047	-2.95917	0.755335	-1.21367	3.82395	2.29375	3.9375	-0.76818	4.06802	3.73711	4.4277	6.28418	-1.50399	0.507153	-2.22901	2.84355	-2.56608	0.556995	6.51438	0.765098	-1.02407	-1.22703	27.7388
340	0.22917	-2.99462	-0.554426	-0.560592	2.93656	0.316007	4.06699	3.83987	6.74663	5.42043	-0.0169565	-3.22328	0.56573	-1.20597	4.02999	2.72434	3.79877	-1.06312	4.06031	3.52849	4.2977	6.48714	-1.34213	0.227114	-2.2434	2.88877	1.03024	0.946481	5.89726	0.36996	-1.54561	-0.951619	27.877
342	0.145929	-2.4294	-1.23217	-0.562647	1.99881	-0.547232	3.02391	2.59794	4.98675	2.52343	-1.52865	-3.03984	0.605809	-0.665414	3.38102	2.00087	3.08916	-1.39197	2.94426	3.09328	3.37486	5.40964	-2.33075	-0.454229	-2.81529	2.97509	4.04952	1.46854	3.66106	1.23731	-1.6715	-1.09498	27.4788
344	0.760473	-2.78241	0.161344	1.06312	1.89091	-1.02818	2.41656	1.84466	3.35893	1.34624	-1.45672	-1.9166	0.737351	-0.268221	2.78652	1.21213	2.99411	-0.740947	2.45407	3.33375	3.06245	4.78944	-2.88671	-0.152608	-3.41853	2.95711	2.85229	1.86624	2.44276	2.21873	-0.928496	-1.34162	27.616
346	0.831382	-3.54082	2.23774	2.09798	2.87541	-0.469643	3.07169	2.36055	3.30909	2.46588	0.0149012	-1.1962	0.422885	-0.465019	2.95094	1.30719	3.60814	0.252292	3.07478	4.07264	3.62766	5.67477	-2.40834	0.944939	-3.41905	2.6966	0.155178	1.51684	2.88466	2.26241	-0.0272332	-1.21522	28.1868
348	-0.271818	-4.21497	2.11237	1.11707	3.22687	0.225573	3.6513	2.83328	3.98632	3.46735	0.985532	-1.95257	-0.178814	-1.14431	3.23201	1.51684	3.93648	0.127945	3.42573	4.23553	4.00225	6.29857	-2.06664	1.22292	-2.89031	2.70173	-1.43822	0.300079	3.48019	1.8313	-0.146956	-0.927469	28.6739
350	-0.806718	-3.23715	1.06158	0.067826	2.89905	0.649999	3.73968	2.94992	5.08541	3.74482	0.663872	-3.03727	-0.135652	-1.83027	3.59375	1.63964	4.0562	-0.46913	3.4766	4.03102	4.06185	6.13414	-1.93304	0.804663	-2.31533	3.02905	-0.509209	0.136679	4.08189	1.59134	-0.946481	-1.0996	28.8302
352	-0.299565	-0.554426	1.07134	-0.950591	2.91498	0.351462	3.83525	3.03984	5.66861	4.13379	0.18498	-3.12051	0.676718	-1.73213	3.92055	1.98802	4.24478	-0.593477	3.72272	4.11015	4.25659	6.23434	-1.93253	0.796441	-2.10106	3.29264	1.95	1.17976	4.70003	1.59597	-1.12221	-1.39557	29.3902
354	0.077075	1.27944	0.769722	-1.85134	2.52446	-0.829327	3.14466	2.38264	4.32391	3.80339	-0.0996836	-2.6709	0.537469	-0.838576	3.13079	1.77529	3.88766	-0.414663	3.27877	3.89229	3.89383	5.74003	-2.76956	0.526165	-2.5815	2.89905	2.78292	1.8349	4.01304	1.54715	-0.863754	-1.21778	30.702
356	0.321146	1.2702	0.713714	-1.11502	2.13909	-1.50142	2.58766	1.64478	3.2577	3.03573	-0.22917	-2.68735	-0.550315	-0.454742	2.76237	1.02561	3.45912	-0.0292885	2.79525	3.55316	3.41699	5.11881	-3.51667	0.199881	-3.18422	2.68015	1.95514	2.11237	3.12256	1.42229	-0.80826	-1.01533	32.0992
358	0.818022	1.15818	2.10569	0.659248	3.09276	-0.746599	3.44679	1.9911	3.95138	3.21454	-0.298537	-2.70944	-0.414149	-0.954702	3.8743	1.02099	3.87379	0.686995	3.33426	3.98735	3.84553	5.90086	-3.13644	0.99067	-2.31533	3.343	1.30103	3.20375	3.47454	1.38786	-0.896125	-1.29229	32.503
360	1.36371	0.827271	2.96071	1.18284	4.00173	0.371501	4.14509	2.76031	4.22422	3.92671	-0.375098	-1.93458	0.815453	-1.3149	4.33315	1.73213	4.54896	1.00043	3.93596	4.72778	4.50169	6.71117	-2.40423	1.73213	-0.718853	3.72118	0.884821	4.81205	3.84604	1.523	-0.814939	-1.56462	32.28
362	1.34008	-1.37296	1.83079	0.0488142	3.25513	0.143873	3.29059	2.75723	2.80193	3.8075	-0.546205	-1.68897	1.25221	-1.66842	2.98794	1.88063	4.33059	0.021581	3.57268	4.61628	4.27201	5.94813	-2.61952	1.0811	-1.41869	2.8862	-0.0760473	4.87268	3.07735	1.44798	-0.892528	-1.23114	33.1232
364	0.495335	-4.37786	-0.118695	-0.681343	2.12521	-0.945967	2.20332	2.18533	1.5302	3.06347	-0.562647	-2.70893	0.516402	-1.87909	1.50502	1.67355	3.57011	-1.40482	2.84869	3.89588	3.63845	4.98367	-3.44525	0.0113043	-3.82138	1.72545	-0.463991	3.14003	2.16735	1.15201	-1.21984	-0.606837	34.9109
366	0.0642292	-5.54888	-1.22909	-0.15415	2.09336	-1.33597	2.09284	1.74292	1.41407	2.56968	0.0323715	-3.26952	-0.0703951	-1.03332	1.48652	1.59442	3.31268	-1.79996	2.47	3.62663	3.37537	5.11983	-3.92723	-0.265652	-4.4313	1.66944	0.210672	2.0245	1.74755	1.17719	-1.09909	-0.380237	36.0105
368	0.468616	-3.87584	-0.723477	0.337588	2.36415	-1.18747	2.25521	1.38478	1.79482	2.26857	0.338616	-2.89237	0.043162	-0.271304	2.14577	1.20031	3.3728	-1.25375	2.24083	3.78592	3.21351	5.36493	-3.98272	-0.0770751	-3.42367	2.17711	0.0416205	2.98075	1.61344	1.5749	-0.892014	-0.496877	35.7438
370	1.03229	-1.12684	0.916165	1.03537	2.4032	-0.77486	2.29478	1.40174	2.43557	2.49672	-0.303162	-1.94023	0.323715	-0.390513	2.55375	1.24039	3.64873	-0.274387	2.35901	4.25351	3.28134	5.24778	-3.50948	0.181897	-2.5034	2.45818	0.0688537	4.84031	2.09284	2.0579	-0.739406	-0.569841	35.0347
372	1.93715	-0.0991698	1.93561	1.92739	2.16067	-0.581145	2.01577	1.35703	2.35438	2.25008	-0.67158	-1.07699	0.150039	-0.626876	2.28964	1.42126	3.81316	0.526165	2.38264	4.67228	3.32142	4.84391	-3.23509	0.243043	-2.6745	2.23004	1.45518	5.38805	2.05071	2.25676	-0.184466	-0.511264	35.1611
374	2.2213	-1.0549	1.21059	1.17154	1.73316	-0.889959	1.61189	0.841659	1.41972	1.22652	-0.413122	-1.72956	-0.532331	-0.767153	1.6345	0.938259	3.46169	0.202964	1.88628	4.41229	2.94015	4.64608	-3.62201	-0.0858102	-3.83422	1.80921	1.17616	3.55316	0.997864	1.90015	0.00976283	-0.360197	36.5474
376	1.38529	-1.50193	-0.359683	-0.732212	1.76861	-1.20391	1.39557	0.466047	0.55905	0.708576	-0.368932	-3.17035	-0.618141	-1.1217	1.11039	0.280039	3.05474	-0.806718	1.38684	3.77873	2.56454	4.83363	-4.1194	-0.527193	-4.4277	1.84466	-1.63245	1.39403	0.0498418	1.16692	-0.996836	-0.31498	38.0411
378	1.03589	-0.0601185	-1.18182	-1.39454	1.9094	-1.74087	1.13095	0.0914623	0.384347	-0.289802	-0.0292885	-3.32604	0	-1.39865	0.879682	-0.248181	2.82094	-1.16486	0.974228	3.43035	2.37237	4.60703	-4.67691	-0.782054	-4.34549	1.7049	-2.32458	1.62731	-0.60324	0.981421	-1.80612	-0.520513	38.1341
380	1.09549	1.40842	-0.84988	-0.628932	1.68589	-2.29838	1.10114	-0.201936	1.38992	-1.14071	0.53079	-2.78138	0.105336	-1.29794	1.26763	-0.306245	2.71201	-0.864781	0.86992	3.50794	2.42221	4.24323	-5.08387	-0.602726	-3.93493	1.27636	0.10328	3.11434	-0.216838	1.15253	-1.84415	-0.752766	37.1948
382	0.826244	0.872489	0.609406	0.00822136	2.00138	-2.04711	1.78146	0.269762	2.66422	-0.213241	0.750196	-2.6113	-0.146442	-1.18439	2.17814	0.16083	3.06964	-0.322173	1.41355	3.95652	2.85229	4.8696	-4.70928	0.0667983	-3.43446	1.48755	0.940315	3.82652	1.10114	0.571382	-1.913	-0.892014	37.2647
384	0.558023	-0.853477	2.4813	-0.203992	2.68735	-1.20597	2.44533	1.14122	2.83173	1.12375	0.544149	-2.17506	0.183952	-1.23474	2.78703	0.841659	3.72991	0.187035	2.07589	4.48011	3.35071	5.7426	-3.78541	0.557509	-3.2428	2.32253	-0.645888	3.40055	1.73573	0.168537	-1.42383	-1.13403	38.3823
386	-0.197826	-2.2994	3.13079	-0.473754	2.34205	-0.795414	2.29067	1.55846	2.2064	2.22027	-0.232253	-1.87909	0.350948	-1.17051	2.54502	1.34933	3.76691	0.0575493	2.16632	4.47857	3.43241	5.41015	-3.35379	0.159288	-3.25822	2.65138	-1.23423	2.13292	1.72597	0.624821	-0.769722	-1.31695	38.5442
388	-1.31644	-3.17857	2.57276	0.0426482	2.08668	-0.966006	2.27268	1.73419	2.02142	3.24126	-0.434703	-2.07229	-0.355059	-0.65411	2.18585	1.58826	3.47711	-0.176759	2.15707	4.24837	3.41391	5.26165	-3.5177	-0.0714228	-3.62766	2.50905	0.293399	1.06877	1.97929	1.00609	-0.636639	-1.06826	37.9646
390	-1.16126	-2.2249	2.13703	0.751738	2.78857	-1.06466	2.72588	1.85391	2.65909	3.25822	0.128972	-2.00395	-0.10585	-0.650513	2.40166	1.56051	3.55264	0.239446	2.33434	4.41999	3.69549	5.92193	-3.59169	0.723991	-4.05157	2.78343	1.37348	1.55383	2.33075	1.37861	-0.506126	-0.995295	37.3428
392	0.365849	-0.169051	2.12624	0.660276	2.95454	-0.71577	2.65292	1.56359	3.06656	2.22798	0.578062	-2.10363	0.736323	-1.61857	2.50596	1.02818	3.60557	0.418774	2.24802	4.51557	3.74841	5.84125	-3.63331	0.987073	-3.77719	2.83019	1.01533	2.92166	2.20178	1.62731	-0.693675	-1.43565	37.0129
394	1.8349	0.711659	1.6864	0.303162	2.60308	-0.161344	2.30865	1.22087	2.48798	1.41407	0.587311	-2.65498	0.204505	-2.03067	2.23209	0.419288	3.48584	-0.0251778	2.12881	4.25248	3.49663	5.51548	-3.77308	-0.0174702	-2.79268	2.36106	0.638695	4.04438	1.68846	1.23063	-1.4896	-1.59237	37.6383
396	2.51419	0.373043	1.02972	-0.452173	2.54245	-0.456284	2.29324	1.18695	1.75166	1.6083	-0.267193	-3.0311	-1.15921	-1.69565	2.01731	0.189604	3.40106	-0.551343	2.16221	4.07624	3.34248	5.74157	-4.04798	-0.67826	-2.13755	2.15039	-0.0205533	4.64197	1.40739	0.727074	-1.94229	-1.20905	38.6598
398	2.6745	-1.27944	1.08778	-1.34419	2.74695	-1.3185	2.68015	1.49885	2.4032	2.70533	-1.03589	-2.74438	-2.04095	-1.26352	2.32921	0.576521	3.64051	-0.670552	2.46075	4.37118	3.54031	6.0211	-4.22679	-0.251778	-2.09644	2.29478	-0.686481	4.51454	2.07075	0.981421	-1.49834	-0.811343	39.5133
400	2.94735	-3.1575	1.18901	-0.17419	3.27569	-1.25581	3.66723	2.37237	4.79149	4.14715	-0.591422	-1.73727	-1.62988	-0.906402	3.49304	1.66996	4.28485	-0.29494	3.29162	5.12138	4.33213	6.51335	-3.78849	0.502015	-2.5445	2.47565	-0.322173	4.43592	3.75612	1.89091	-0.893556	-0.692647	39.9927
402	2.90059	-3.7145	0.791303	2.06612	3.92671	-0.715256	4.71647	3.17754	6.68497	4.68667	0.237905	-1.06415	-0.680829	-1.07751	4.59213	2.37237	4.81975	-0.0822132	4.00584	5.70252	5.18612	7.49631	-3.12051	1.07443	-3.65335	2.85229	0.769722	4.31825	4.91636	2.39652	-0.638695	-0.742489	39.9726
404	2.09695	-2.62723	0.820078	2.27371	3.93391	-0.762015	4.5428	2.786	5.88493	3.32245	0.150553	-1.52814	-0.20245	-1.5677	4.22371	1.60008	4.72624	-0.230197	3.71347	5.63726	5.12651	7.63762	-3.25256	1.32466	-4.38659	3.49509	1.42846	3.57268	3.993	1.74035	-0.787192	-0.722963	39.7738
406	1.35909	-0.633043	1.27636	0.879169	3.07632	-0.802094	3.40671	1.97723	3.97399	2.30865	-0.0416205	-2.51162	0.169565	-1.73778	3.03264	0.77486	4.35731	-0.443438	3.03573	5.17019	4.51865	6.4892	-3.8147	0.729643	-4.01509	3.58861	0.893556	2.823	2.72948	0.902805	-1.16897	-0.728615	39.6576
408	1.35755	0.88739	1.50604	0.558537	2.63956	-0.151067	3.2428	2.31893	3.77256	3.70371	0.751738	-2.36209	0.637153	-1.43462	2.87387	1.27944	4.61679	0.0966006	3.21762	5.30533	4.58853	6.11307	-3.46375	-0.0560078	-2.67604	3.41853	-0.0354545	3.06656	3.34711	1.2815	-1.09087	-1.07443	38.9542
410	1.71055	1.43668	1.65146	1.36628	3.17241	0.344782	3.86403	3.07426	4.46521	5.47695	0.900236	-1.08059	0.670552	-0.909998	3.28699	1.96747	5.10082	1.2702	3.75201	5.94145	4.97699	6.7605	-2.71612	0.30162	-1.75731	3.47865	-0.434703	4.38248	4.55719	1.70182	-0.846797	-1.44541	37.1239
412	1.48344	0.825216	1.94383	1.56565	3.64616	-0.200909	4.04644	2.98897	5.00885	5.49031	0.0107905	-0.346324	0.221976	-0.384861	3.26695	1.89039	4.99549	1.60624	3.74995	6.15418	4.91327	7.11556	-2.93707	1.11348	-2.37391	3.2649	-0.361739	5.08643	4.90043	1.55486	-0.859643	-1.35601	36.1358
414	0.948536	0.419288	2.43557	1.30411	3.82652	-1.04925	4.09422	2.46023	5.7909	4.12608	-0.0637153	-0.593991	0.0411067	-0.257944	3.48739	1.42537	4.70055	1.19672	3.49818	6.03754	4.69078	7.25481	-3.66671	1.50707	-3.08557	3.27877	-0.266679	4.91122	4.53458	2.18379	-0.616086	-1.08881	36.8799
416	0.850394	1.04103	2.95351	1.78814	4.11478	-0.763042	4.26944	2.24083	6.00209	3.01877	0.702924	-1.11399	-0.0647429	-0.403873	3.88818	1.25735	4.72624	1.07854	3.41391	6.10896	4.6245	7.45983	-3.68264	1.72545	-2.22798	3.7443	0.080158	4.66149	3.81059	3.24383	-0.295968	-0.860157	37.6522
418	0.766125	0.910512	2.46691	1.71004	3.9411	-0.0518972	3.82497	1.97312	4.4873	2.33383	0.177272	-1.66944	-0.499446	-0.578576	3.37691	1.18644	4.54228	0.658734	3.08557	5.89007	4.2864	7.12173	-3.47659	1.51786	-1.56154	3.25256	0.768694	4.1009	2.71612	3.11794	-0.489683	-0.608892	37.8859
420	0.537469	-0.760987	1.54818	-0.309328	3.06553	-0.189091	2.57173	1.56051	1.53328	1.4598	-1.44901	-2.40166	-1.03229	-1.09858	1.9315	0.914109	3.92003	-0.270276	2.3215	5.14964	3.67391	6.11564	-3.62869	0.832923	-2.88569	1.78865	0.701382	3.55059	1.02253	2.20178	-1.10988	-0.509209	38.1891
422	0.605295	-2.54142	1.52917	-1.37296	2.6745	-0.394624	2.08873	1.74138	0.176759	1.28458	-2.01217	-2.56094	-1.70336	-1.22601	1.38529	0.957271	3.84501	-0.562133	2.16375	4.99703	3.68727	5.74671	-3.55675	0.373043	-3.57731	1.09446	-0.290316	3.57268	0.350434	1.8534	-1.2517	-0.526165	38.8283
424	0.970117	-2.90675	1.64632	0.3566	3.10047	-0.187549	2.99359	2.20178	2.32098	1.58518	-1.02869	-1.70233	-1.72597	-0.89818	2.73976	0.94905	4.32082	-0.268221	2.84304	5.56738	4.30644	6.389	-3.21608	0.378181	-2.72023	1.8164	-1.52146	3.90308	1.55075	2.08257	-0.319604	-0.624307	39.1608
426	1.29691	-2.08102	1.68537	1.96849	3.59375	0.38075	3.90873	2.47051	4.90865	1.61549	0.816481	-1.0102	-1.2219	-0.85656	4.09165	0.622766	4.61679	0.157747	3.23509	5.92912	4.69489	7.05082	-2.7562	0.582687	-2.19355	2.89442	-2.19201	3.86916	2.69454	2.33023	0.415691	-0.810829	38.4589
428	0.747627	-1.68075	1.83336	1.26865	3.41288	0.598102	3.42367	2.40679	4.1898	1.69822	1.63964	-1.27431	-0.73324	-0.930038	3.30857	0.550315	4.31363	0.503043	2.63494	5.63983	4.27355	6.56422	-2.68992	0.693161	-2.41245	3.14826	-1.44079	2.75877	2.24185	1.87395	-0.214268	-0.802607	37.3048
430	-0.825216	-2.19355	1.65249	-0.0226087	2.69197	0.0169566	1.95257	1.92944	1.0734	1.46288	0.673121	-1.83027	0.109446	-1.08573	1.36012	0.683912	3.59837	0.33245	1.65763	5.07205	3.44885	5.27604	-3.30497	0.65154	-3.02802	2.53679	-0.137707	1.47676	0.747113	0.971145	-0.977824	-0.763556	37.1152
432	-1.02407	-0.784623	1.53996	0.127944	2.23723	-0.344268	1.55743	1.70284	0.206047	1.35292	-0.150553	-1.55486	1.13197	-0.890473	1.17411	0.893556	3.2798	0.0518971	1.52917	4.76837	3.20169	4.89272	-3.69908	0.330909	-3.38154	2.32664	1.1849	2.56814	0.441383	0.607351	-0.264624	-1.09909	37.536
434	0.776402	3.12051	1.77272	0.736837	2.01782	-0.292885	2.22644	1.72083	1.71929	1.36114	0.132569	-0.860671	1.4747	-0.160316	2.50751	1.1402	3.23869	-0.170593	1.82411	4.55051	3.26695	5.35466	-3.75047	-0.286719	-3.26387	2.96584	2.7932	5.55248	1.12581	0.814939	1.02458	-1.43103	37.6234
436	1.98648	5.51805	1.76964	0.327826	1.74344	-0.514347	2.19098	1.5677	1.93612	1.30308	0.293399	-0.879682	0.678774	0.0143873	2.64316	1.16383	2.85486	-0.809801	1.6345	4.20007	3.06913	5.35054	-3.9262	-0.795927	-3.30909	3.27414	2.75106	7.08011	1.21265	1.24193	1.16229	-1.31901	37.8299
438	1.53174	4.22731	1.3519	-0.38075	1.45055	-0.936204	1.63193	1.5415	1.42794	2.28553	-0.578062	-1.49166	-0.861698	-0.356086	1.71466	1.0698	2.45355	-1.53328	1.41818	3.83782	2.87849	4.96671	-4.10604	-1.26506	-3.77462	2.52652	0.500473	5.97588	1.52917	1.41869	0.44241	-0.716283	38.7281
440	0.624821	0.784623	1.06415	0.0375098	1.81126	-1.00763	1.8945	1.70438	1.98596	3.04395	-1.22601	-1.96593	-2.7932	-0.589367	1.52608	1.00249	2.55478	-1.63091	1.64016	3.90102	3.02134	5.40655	-4.0675	-1.07597	-4.09885	1.34522	-0.697785	4.26327	2.18019	0.915651	-0.452173	-0.176245	39.5354
442	0.591936	-1.49782	0.870433	1.15715	2.76185	-0.756876	2.73051	1.64221	2.59332	2.16221	-0.424426	-1.79739	-3.3949	-0.7949	2.15142	0.838576	2.95043	-0.967034	1.83182	4.42821	3.29059	6.39311	-3.9226	-0.0755335	-4.16102	1.50245	0.0945453	3.48071	2.03889	0.652568	-0.83652	-0.439327	38.8345
444	1.35703	-1.10012	0.59656	1.80047	3.00747	-0.624307	2.89802	1.36628	2.31276	1.50348	0.482489	-1.14122	-1.86676	-0.896125	2.4366	0.683912	3.12308	0.0878654	1.73727	4.78379	3.35173	6.41778	-3.91798	0.315493	-4.02845	2.86051	0.498418	3.23869	1.42846	1.06261	-0.488655	-1.01431	36.8285
446	1.83438	-0.587311	0.746086	1.49731	2.47719	-0.484545	2.45355	1.36988	1.68948	2.13446	0.288774	-1.03537	-0.146956	-1.03383	2.20178	0.73992	3.0496	0.62071	1.64581	4.82386	3.33169	5.70149	-3.89177	-0.2266	-3.57988	3.6215	0.289288	2.81837	1.36269	0.956757	-0.308814	-1.03743	35.9113
448	2.12984	-1.02047	1.27533	1.06723	1.72083	-0.340671	1.93201	1.35035	0.844742	1.88628	-0.168023	-1.36423	0.802094	-1.37656	1.76913	0.630987	2.87695	0.373043	1.46237	4.64865	3.1945	5.12394	-3.90051	-1.02047	-3.40003	3.14209	-0.347865	3.0645	0.970631	0.829841	-0.102253	-0.841145	36.662
450	2.59897	-0.542608	1.4228	1.77427	1.02253	-0.190632	1.35498	0.946994	-0.24664	0.499959	-0.324229	-1.02869	0.817509	-1.41561	1.15715	-0.0472727	2.66268	0.20913	1.02201	4.48679	2.8415	4.6358	-4.05825	-1.54201	-3.47865	1.87703	-1.7979	4.54023	-0.320118	1.5266	0.295454	-0.993753	36.865
452	2.28347	-0.599643	1.24399	2.00087	1.2928	-0.262055	1.33083	0.894583	-0.177273	0.540039	-0.559564	-0.808773	0.187549	-1.01636	1.09806	-0.28415	2.68272	0.064743	0.894583	4.58802	2.83173	4.72675	-4.18774	-1.01328	-3.38308	1.83541	-1.04668	5.26114	-0.389999	1.99521	0.00873516	-1.09755	36.6738
454	1.14174	-2.1283	1.20494	0.514347	2.14217	-0.866837	1.9351	1.33956	1.66636	2.1843	-1.15818	-1.27328	-0.0621738	-0.54158	1.88063	0.551857	2.87335	-0.417746	1.31695	4.67074	3.22533	5.29454	-4.31774	-0.0616599	-3.8111	3.18679	1.99727	4.56746	1.38118	2.02553	-0.44909	-0.860157	36.9482
456	0.12332	-2.80245	0.881224	-0.136166	2.40371	-1.30205	2.36004	1.48241	2.99154	2.73051	-1.53328	-1.57695	-0.181383	-0.376126	2.48747	1.12016	2.9381	-0.655651	1.54767	4.66509	3.38102	5.68248	-4.47806	0.0236364	-4.31723	3.60403	3.0681	3.99865	2.22593	1.73984	-0.242015	-0.529762	36.7632
458	-0.0529248	-1.75268	0.698299	0.883793	2.42221	-0.953674	2.63339	1.35703	3.01928	1.44695	-0.663359	-1.3519	-0.569841	-0.396165	2.82608	0.90486	3.18577	-0.251778	1.45209	5.05304	3.41545	6.18039	-4.34035	-0.238932	-3.48225	3.24434	2.47051	4.07418	1.45055	1.0847	0.289288	-0.450118	35.9986
460	0.568299	0.697785	1.67201	1.52146	2.5481	-0.334505	3.03932	1.57695	3.43549	1.1885	0.918734	-0.563161	-0.287747	-0.399248	3.32039	0.765611	3.57474	0.451659	1.54664	5.66809	3.61482	6.63872	-3.89845	0.206561	-2.25676	3.20272	1.34778	4.80999	1.47265	1.27688	0.750196	-0.644347	35.0953
462	1.16435	2.8749	2.4217	1.65043	2.34411	-0.242529	2.9047	1.72494	3.84758	2.53525	1.86881	0.172134	0.0611462	-0.532845	3.25411	0.976283	3.51308	0.820078	1.51221	5.7945	3.52284	6.33145	-3.80339	0.767667	-2.21	2.94581	-0.144387	5.42865	2.41758	2.01423	1.0251	-0.690592	34.4869
464	1.63656	2.74798	1.54047	2.08462	1.72442	-0.664386	2.1879	1.3781	3.45964	3.10561	1.24245	-0.0318577	-0.583201	-0.608892	2.64059	1.16794	2.99976	0.474268	1.00557	5.219	2.9864	5.51805	-4.30078	0.157747	-2.4962	2.77264	-0.173162	5.11058	2.63391	2.11853	0.814426	-0.73324	34.5609
466	1.92739	0.88739	0.72656	1.47778	1.29846	-1.16692	1.49577	0.751224	2.56557	2.1879	-0.591422	-0.961896	-0.783596	-0.636125	2.23312	0.637667	2.46948	-0.350948	0.268221	4.42462	2.39138	4.90094	-4.96877	-0.938773	-3.07735	3.24588	0.468102	4.30181	1.68743	2.10929	0.142332	-0.873003	35.4899
468	1.28356	-1.33648	1.04565	-0.182925	0.999919	-1.65608	0.642805	-0.114585	0.459367	0.266166	-1.96079	-1.96336	-0.591936	-0.721936	1.34778	-0.6166	2.04968	-1.21213	-0.651541	3.80237	1.87755	4.35217	-5.50778	-1.58261	-4.50837	2.99411	0.121778	3.50743	-0.437272	1.75936	-0.402845	-0.740434	36.7088
470	0.41826	-2.27936	1.65968	-0.913081	0.626876	-1.77581	-0.0333991	-0.751224	-1.62474	-1.45723	-1.94486	-2.39755	-0.948022	-0.912054	0.220948	-1.28972	1.94023	-1.40174	-1.2666	3.68213	1.72442	3.86659	-5.73952	-1.79328	-5.03248	1.7049	-0.3083	3.98323	-2.30146	0.951105	-0.506126	-0.608892	37.0371
472	0.312411	-1.2517	1.3817	-0.530276	0.667469	-1.38889	0.228142	-0.555454	-1.2517	-1.2111	-0.787192	-2.14114	-1.45312	-0.945967	0.124861	-0.873003	2.36312	-0.938773	-0.91822	4.07881	2.13755	3.9781	-5.60438	-1.51992	-4.25351	0.642805	0.437272	5.06948	-1.84158	0.940828	-0.247668	-0.514861	36.7663
474	0.86735	0.80158	0.364308	-0.13	1.30154	-1.14071	1.16897	0.20245	0.840631	0.82573	0.285691	-1.85956	-1.74652	-0.494307	1.01739	0.0179842	2.96687	-0.739406	0.0657707	4.53047	2.79114	4.86549	-5.219	-0.728615	-3.60968	0.562647	1.31439	5.05869	0.216324	1.75012	0.100711	-0.31909	36.3727
476	1.43873	1.77684	0.33245	-0.0750196	1.78711	-1.34213	1.76039	0.868378	2.36672	2.31944	0.763042	-1.62474	-1.10063	-0.265138	1.92482	0.628932	3.15802	-0.959327	0.737865	4.71647	3.19399	5.44303	-4.85007	-0.0719367	-4.14972	1.65043	0.468616	4.64197	1.51221	2.49466	0.331936	-0.403359	36.2083
478	1.1551	0.115613	0.995809	0.391027	1.55743	-1.57336	1.5934	0.668497	2.29581	1.26711	0.762528	-1.61755	-0.539525	-0.814939	2.19304	0.0745058	2.81889	-1.06004	0.556995	4.54588	3.02494	5.17892	-4.8028	-0.357114	-5.00268	2.73154	-1.63193	4.03256	0.818536	2.29632	-0.0796441	-0.625849	36.6296
480	-0.0940314	-3.07735	1.09035	0.913082	1.03126	-1.91608	1.03229	-0.423399	1.17822	-1.16537	0.135138	-2.28707	-1.30616	-1.43616	1.65043	-1.27944	2.18276	-1.0364	-0.250237	4.11118	2.38881	4.71699	-5.39165	-1.0549	-5.16659	2.40782	-2.2511	2.5183	-0.826244	1.3632	-0.985018	-0.577035	36.7601
482	-1.133	-4.996	1.04822	1.08008	0.897153	-1.9834	0.653596	-0.928496	0.33245	-1.65197	-0.659762	-2.59434	-2.03324	-1.68948	0.85656	-1.59648	1.9798	-0.652568	-0.754307	3.91952	2.02039	4.3943	-5.92347	-1.13249	-5.17687	1.61035	-0.809287	1.58877	-1.3185	0.964465	-1.14533	-0.649485	35.7916
484	-0.813398	-3.15699	0.977311	1.51478	1.53379	-1.25118	0.998378	0.165968	0.388458	0.333992	-0.75071	-1.5194	-1.26454	-1.75423	0.732726	-0.370474	2.72075	0.398221	-0.194743	4.64505	2.54399	4.55359	-5.32896	-0.156205	-4.56541	1.95308	0.112529	2.9345	-0.159802	1.26249	-0.620197	-1.16178	34.3431
486	0.335019	1.16229	0.330395	1.33494	1.81537	-0.840117	1.10937	1.08522	-0.142845	1.28664	-0.0421344	-0.377153	-0.490711	-1.71466	0.626876	0.405414	3.21814	0.903319	0.209644	5.31715	2.95249	4.6841	-4.6692	0.529248	-4.17489	2.2177	-0.688536	5.13576	0.270276	1.14431	-0.408497	-1.39968	33.6201
488	0.923358	4.23244	-0.145929	-0.0940314	0.817509	-1.76348	0.176245	0.0873515	-1.62782	-0.543122	0.261027	-0.546718	-1.133	-1.50399	-0.120237	-0.596046	2.35747	0.154664	-0.730671	4.57055	2.10261	3.92723	-5.59513	-0.573438	-5.23134	1.47778	-1.74909	6.13054	-1.31079	0.200395	-1.0811	-1.00043	33.4284
490	1.04051	4.57517	0.1783	-1.37964	-0.318063	-3.25154	-0.647944	-1.28767	-1.7162	-2.2362	-0.341185	-1.61344	-1.72031	-1.06261	-0.402845	-1.6417	1.02356	-1.21419	-1.7794	3.15648	0.912054	2.99873	-7.08936	-2.3698	-6.7343	1.02201	-1.35344	5.7205	-2.36312	-0.417233	-1.77838	-0.638695	33.8626
492	1.69051	3.28545	0.366363	-1.27379	-0.449604	-3.68675	-0.409011	-1.22498	-0.221462	-1.77992	-1.19877	-2.27063	-1.6977	-1.04462	0.236363	-1.10782	0.613517	-2.17865	-1.73676	2.57533	0.68905	3.15802	-7.42746	-3.12102	-7.24094	1.10217	0.447035	5.23647	-1.57027	0.024664	-1.30514	-0.725018	35.4668
494	2.15347	1.63399	0.261027	-0.329367	0.221976	-2.62209	0.503043	0.0806718	1.34367	0.545691	-2.05585	-1.7049	-1.67767	-1.17822	0.902291	0.374071	1.38684	-2.05071	-0.728615	3.12411	1.47727	4.12865	-6.41778	-2.65806	-6.62896	1.28356	2.14474	5.55967	0.235336	0.77486	-0.295454	-0.638695	37.2539
496	1.31284	0.579604	0.292371	0.396165	0.645374	-1.54818	0.931579	1.54201	2.30557	3.79414	-2.26549	-0.992212	-1.43205	-0.82984	0.908971	1.5564	2.29272	-1.63964	0.358142	3.83114	2.3847	4.33983	-5.15169	-1.85597	-6.21378	1.42075	1.87498	5.87311	2.42272	1.15304	0.0652568	-0.101739	37.8006
498	0.223004	0.954188	0.240474	1.10269	0.405928	-1.15561	0.571896	2.09079	2.23928	5.23699	-1.34213	-0.625335	-1.07648	-0.789761	0.401817	1.7532	2.52652	-1.14944	0.764584	4.16513	2.66731	3.51051	-4.6913	-1.55332	-5.75801	1.23988	0.269762	6.28418	3.34711	1.18233	-0.0441897	0.177272	35.8974
500	0.242015	1.21778	0.271818	2.13652	0.280039	-0.911026	0.337074	1.55435	1.34778	3.42624	-0.13411	-0.067826	-1.44182	-1.09446	0.0786165	1.00917	2.44225	-0.205533	0.489683	4.47446	2.4479	3.28494	-4.97185	-1.76193	-4.76426	0.94237	0.169051	6.72299	2.00909	0.65154	-0.138735	-0.120237	33.0539
502	1.19929	0.0133598	0.621224	2.55478	0.0107904	-1.35395	0.103794	0.519999	0.142332	0.547232	0.29083	0.0452173	-2.4998	-1.25118	-0.293913	-0.0693674	2.10877	0.411066	-0.233794	4.513	1.92328	3.54956	-5.67118	-2.30762	-4.81462	0.25743	0.696758	6.02983	-0.139763	-0.362766	-0.119209	-0.384347	31.7945
504	1.62371	-1.35857	0.62739	1.92585	-0.887904	-2.23928	-0.483517	-0.104308	-0.581659	-0.646916	-0.492252	-0.822647	-3.50331	-1.29332	-0.951619	-0.450118	1.5528	0.040079	-0.881738	3.96474	1.38529	3.046	-6.25386	-3.04806	-5.69687	-0.668497	-0.708576	4.25043	-1.07494	-1.35087	-0.215296	-0.0858101	31.9604
506	0.754307	-1.30462	0.0184981	0.978338	-0.861698	-2.2064	-0.357114	0.399762	-0.152609	0.521027	-1.69359	-1.73316	-3.77462	-1.02047	-0.904346	0.361739	1.60573	-0.814939	-0.641264	3.66414	1.58106	2.98897	-5.92809	-2.98177	-5.67991	-0.607865	-1.70387	2.59794	-0.187035	-1.73573	-0.467588	0.433161	32.5549
508	-0.14079	0.483517	-0.338102	0.125889	0.723477	-1.65865	0.861698	1.37348	1.32261	2.39343	-2.4962	-1.65865	-3.03778	-0.417233	0.353003	1.13454	2.33229	-1.22446	0.326284	4.11632	2.38367	4.39327	-5.16813	-1.74755	-5.19023	0.287233	-0.761501	2.43814	1.44387	-1.35549	-0.14079	0.307786	32.7142
510	-0.420829	1.67766	-0.225059	-0.333478	1.31952	-1.62063	1.18233	1.31695	1.93921	1.7681	-2.59486	-1.22909	-1.6196	-0.375098	0.954188	0.614031	2.41553	-1.23731	0.435731	4.4241	2.47976	4.96414	-5.24726	-1.22087	-5.31663	0.652568	-0.816995	3.41596	1.16589	-0.149525	0.156205	-0.441896	32.7414
512	-0.483003	0.994781	-0.293913	-0.272845	-0.214782	-2.06304	-0.343754	0.159802	0.704979	-1.34162	-1.70901	-1.06004	-0.545177	-0.883279	-0.133597	-0.564703	1.57284	-1.41304	-0.802093	4.04233	1.66225	3.21608	-6.02624	-2.07589	-5.87311	0.146442	-1.59956	4.20059	-1.05747	1.29846	-0.0981422	-0.968575	33.2964
514	-0.633043	-0.0154151	-0.704979	-0.175731	-1.25632	-2.44071	-1.12375	-0.426481	0.284663	-1.93664	-0.788734	-1.0847	-0.819564	-0.624821	-0.65822	-0.890987	1.13197	-1.76193	-1.39763	3.64205	1.29486	2.00344	-6.42291	-2.73668	-6.08224	-0.116126	-0.135652	4.40869	-1.25016	1.24605	0.0025692	-0.722963	34.1283
516	-0.649485	-0.239446	-1.28047	-0.434189	-0.59656	-2.22901	-0.455256	-0.03083	0.633556	0.465019	-0.716797	-1.45877	-1.83952	0.323715	-0.14747	-0.0570354	1.47727	-1.83027	-0.92233	3.68264	1.61498	2.7896	-6.29651	-2.53268	-5.67118	0.384347	2.06664	4.55667	0.370988	0.647944	0.0966007	-0.241502	34.5054
518	-0.186008	0.542608	-1.07905	-0.493794	0.517944	-1.41972	0.129486	0.525137	0.0667983	1.68897	-1.38016	-1.6083	-2.58458	0.692647	0.00667983	0.778457	1.97106	-1.36885	-0.520513	4.03051	2.05687	4.01406	-5.79655	-1.75525	-4.74833	0.992212	1.89604	5.23082	0.699841	0.910512	0.0107905	-0.149525	34.2603
520	0.194229	0.845256	0.236877	0.0344268	0.810315	-0.630987	0.314466	0.936204	-0.19834	1.29383	-1.99316	-1.31439	-2.89802	-0.14079	0.0226086	0.892528	2.23055	-0.880196	-0.361738	4.33829	2.3328	4.5356	-5.13114	-1.33905	-4.01355	1.26711	0.583201	5.53964	0.27079	0.830354	0.138221	-0.255889	34.0445
522	-0.0996835	-0.683398	0.99067	-0.0960868	0.114585	-0.493794	0.208616	1.15664	0.605809	1.24039	-1.71466	-1.24656	-2.47205	-1.1515	0.223517	0.792331	2.26703	-0.89818	-0.177786	4.32288	2.34873	4.12968	-4.85161	-1.8611	-4.30695	1.36885	0.652568	4.49244	0.51075	0.530276	0.353517	-0.0287747	34.2773
524	-0.731185	-1.94846	0.51743	-0.862726	-0.242529	-0.855532	0.231225	1.34162	1.83593	2.39857	-1.16846	-1.41458	-1.67201	-1.07545	0.336047	0.888931	2.39446	-1.33288	0.263597	4.15794	2.45098	3.78387	-4.82695	-2.24185	-5.07256	1.38221	1.32723	3.57371	1.61755	0.866323	0.611975	0.514347	34.898
526	-1.01431	-1.19312	-0.511264	-0.472726	-0.0195257	-1.24707	0.361225	1.55229	2.30917	3.53517	-1.38735	-1.64067	-1.70387	-0.806718	0.0282608	1.07288	2.50545	-1.87446	0.509209	3.89999	2.46845	3.86351	-4.93023	-2.37802	-5.6311	1.08881	0.531817	4.1343	2.35952	0.716283	0.523082	0.67826	35.2387
528	-1.17103	-0.694702	-1.36423	0.447035	0.0416205	-1.64221	0.362252	1.65711	1.77838	3.58347	-1.82	-2.19766	-2.28142	-0.92901	-0.169565	1.20237	2.43506	-2.4443	0.398734	3.47454	2.42632	3.93956	-5.2745	-2.64316	-6.19786	1.15356	-0.833437	4.67948	2.0615	-0.198853	0.127431	0.52822	35.6199
530	-1.31644	-1.39814	-1.16589	0.747113	0.0781027	-1.74549	0.597588	1.54612	1.59545	2.99154	-1.53122	-2.72383	-1.86573	-0.90075	0.360197	1.02972	2.41553	-2.47205	0.412094	3.30652	2.58766	4.25659	-5.49185	-2.50751	-6.20454	1.73727	-1.11091	4.78636	1.72237	0.122806	-0.0796441	0.261541	35.4776
532	-0.597588	-1.20391	0.188577	1.06929	0.347351	-1.1217	1.03024	1.4598	2.10826	2.29067	-0.62739	-2.31533	-0.51743	-0.940315	1.16692	0.749683	2.67502	-1.40431	0.627904	3.7741	2.84304	4.66201	-5.1856	-2.06664	-4.6877	1.89245	-1.53533	5.78833	1.61292	1.41253	-0.06166	-0.447035	33.4351
534	0.673635	-0.113557	1.58518	1.23525	0.784623	-0.728615	1.24399	1.17822	2.04608	1.06466	-0.0369961	-1.30154	-0.0976282	-1.08624	1.52608	0.328853	2.87438	-0.110474	0.566244	4.44055	2.96739	4.95798	-5.00679	-1.71518	-3.36972	1.43359	-2.08102	6.76872	0.914623	1.59237	0.359683	-1.00917	30.925
536	1.19312	0.889445	1.3966	1.12992	1.21573	-1.2147	1.29794	0.397193	1.50502	-0.666955	-0.309841	-0.744544	-0.691619	-1.11091	1.46802	-0.365849	2.60719	0.269762	0.0359682	4.66817	2.82711	5.39833	-5.53039	-1.44284	-3.4658	1.10834	-0.737351	6.48406	-0.132055	1.04514	0.806718	-0.844228	30.2083
538	0.704465	1.39506	-0.0827272	0.901263	1.38324	-1.64478	1.48857	-0.226087	1.87189	-1.49063	-0.901777	-0.909998	-0.847825	-1.18387	1.68897	-0.721936	2.2398	-0.252292	-0.302648	4.33315	2.52189	5.75082	-6.12489	-1.3483	-4.6913	1.76964	0.778457	5.28786	-0.306758	0.919761	0.290316	-0.439327	31.036
540	-0.161858	0.0539527	-0.86735	0.28826	0.978338	-1.89399	1.42897	-0.316007	2.46588	-0.7949	-0.963951	-1.32466	-0.252806	-1.16486	1.82102	-0.647944	2.02964	-0.933121	-0.240474	3.81007	2.20126	5.2894	-6.37667	-1.47881	-6.81343	2.40217	-0.135652	3.36458	0.336561	1.2815	-0.455256	-0.487628	31.8294
542	-0.620197	-1.93304	-0.483003	0.0174703	0.221976	-2.18893	0.722963	-0.28415	1.33288	0.175731	-0.771777	-1.27739	-0.14747	-1.00249	0.988101	-0.590908	1.87292	-1.02561	-0.481975	3.57833	1.89604	4.26841	-6.60327	-1.76759	-7.60935	1.60881	-1.393	2.10517	0.288774	1.56976	-0.538497	-1.01174	31.8381
544	-0.410553	-1.82205	-0.0241501	-0.036996	-0.224031	-2.54296	0.027233	-0.699327	-0.722963	-0.098656	-1.23114	-1.12632	-1.30308	-1.00763	0.0698812	-0.800038	1.52608	-0.816481	-1.26865	3.39849	1.46802	3.85478	-7.04825	-2.38881	-6.86635	0.587311	-1.16229	2.55272	-0.89818	0.646402	-0.488142	-1.19261	31.2477
546	0.283636	0.0570354	0.282608	-0.0457311	0.0837548	-2.54861	0.232253	-0.861184	-0.521027	-0.0585771	-1.40533	-1.15407	-1.8981	-1.1962	0.516916	-0.802093	1.38786	-0.755335	-1.48035	3.42059	1.4264	4.38557	-7.16694	-2.49004	-5.66604	1.11193	-0.107391	3.86711	-0.816995	-0.557509	-0.631501	-0.921817	30.8254
548	0.941856	1.6381	0.620197	0.0133596	0.656679	-2.1062	1.00917	-0.10585	1.72185	1.84158	-0.850394	-1.00197	-1.70747	-1.20905	1.85031	-0.0919761	1.79996	-0.908457	-0.587311	3.72067	2.00652	4.98213	-6.58015	-1.81486	-5.13319	2.59229	1.24091	4.6173	1.18027	-0.36328	-0.706007	-0.783596	30.9507
550	1.25067	1.55486	1.01431	-0.22249	0.838062	-2.19921	1.1402	0.325256	2.45304	2.87798	-0.568813	-1.1181	-1.71826	-1.35292	2.11083	0.498418	1.94434	-1.38221	-0.0945454	3.63229	2.19561	4.94564	-6.30884	-1.5564	-6.3741	3.37126	1.21573	4.07881	1.89604	0.50407	-0.452173	-0.994267	31.3495
552	0.853991	-0.181383	0.637153	-0.193201	0.0503556	-2.88517	-0.0385376	-0.693161	0.564703	0.742489	-0.791817	-1.78506	-1.24759	-2.34873	0.694703	-0.318063	1.22857	-1.87755	-1.1664	3.00695	1.2815	3.93339	-7.132	-2.4181	-7.43928	2.62928	-0.196284	2.83841	-0.146443	0.386916	-0.526679	-1.47881	31.5103
554	-1.003	-2.37596	-1.18747	-0.804149	-1.75936	-3.64822	-1.62268	-2.32612	-1.42435	-2.28347	-1.55537	-2.86462	-1.32569	-3.55778	-0.818022	-1.99573	0.0452174	-2.54707	-2.78343	1.98494	-0.107905	2.45612	-8.46694	-4.34857	-7.72497	0.656165	-1.70027	1.76245	-2.46537	-0.601185	-1.56154	-1.45466	31.6007
556	-2.37391	-2.59537	-2.25676	-2.20794	-2.04249	-3.93956	-1.51838	-2.50288	-1.35035	-2.20126	-2.22336	-3.4247	-2.47873	-3.29367	-0.70909	-2.27679	-0.194229	-2.90007	-2.88363	1.62474	-0.193201	2.68375	-8.80093	-5.01296	-7.90481	-0.47992	-2.68272	2.5034	-2.22952	-1.43719	-2.17043	-0.800038	32.1099
558	-0.972172	-0.0071937	-1.28253	-2.39909	-0.578576	-3.51513	-0.278498	-1.11348	-0.525651	0.741461	-2.16427	-2.71818	-2.75363	-1.68589	0.201936	-0.701382	0.808259	-2.40474	-1.56565	2.48901	1.10782	4.03565	-7.95054	-3.62715	-7.36939	0.268221	-1.69565	5.0813	-0.409011	-1.39454	-1.0364	-0.532845	32.6279
560	1.33494	2.16529	-0.738378	-1.85185	-0.384861	-3.11332	-0.308814	-0.22917	-0.598616	2.89083	-2.28142	-1.89502	-1.66431	-0.796955	0.0051384	0.486086	1.35601	-1.97363	-0.957785	3.08505	1.77632	3.61071	-7.46086	-2.98897	-6.78054	0.987073	0.0719366	7.00714	0.435731	0.489683	-0.0462449	-0.547746	32.668
562	1.95616	1.56925	-1.65197	-1.70336	-1.14174	-3.34916	-0.724505	-0.324742	0.251778	3.57217	-3.30395	-1.88063	-1.14071	-1.11861	-0.31909	0.353517	0.952647	-2.3364	-1.20031	2.64521	1.42383	2.7413	-7.65611	-3.64873	-7.68694	0.62328	0.745572	6.65517	1.18387	2.1581	-0.475809	-0.271818	32.3782
564	0.923872	-0.0164427	-1.83387	-0.708576	-1.12016	-3.55675	-0.0298023	-0.297509	2.8379	3.93391	-3.52798	-1.61138	-1.48755	-1.29948	0.349407	0.226087	0.848339	-2.87284	-0.944425	2.32407	1.3483	3.41596	-7.56105	-4.05209	-8.96536	0.276442	1.02047	5.52216	2.82814	1.46751	-0.431106	9.8656e-08	32.578
566	-0.341185	-0.735809	-0.396679	1.22806	-0.592964	-2.95043	0.769208	0.111502	4.61833	3.47865	-1.86676	-0.913595	-1.18747	-1.14122	1.14122	0.44241	1.43359	-2.60513	-0.234822	2.93296	1.90581	4.26482	-6.95113	-3.6549	-8.51576	0.708062	0.234822	5.56327	3.59837	0.392055	0.231739	-0.0272332	33.2548
568	-0.853477	-0.821105	0.379209	2.00292	-0.332964	-2.32253	0.618141	-0.00462443	3.38513	1.61241	-0.282608	-1.05798	-1.22395	-1.38016	0.999405	0.0868378	1.76245	-1.69822	-0.218379	3.68316	2.14012	4.18414	-6.6639	-3.08043	-7.22347	1.23371	-1.72802	5.98667	2.09593	-0.285177	0.162371	-0.340158	33.0061
570	-0.974742	-1.07545	-0.666955	0.972172	-0.69162	-2.35284	-0.397707	-0.745572	0.282094	-0.430592	-0.232253	-2.01371	-2.59588	-2.02913	-0.435217	-0.78822	1.50193	-1.26197	-1.02921	3.77719	1.72699	3.39335	-7.0426	-3.41391	-6.3371	0.692133	-2.66474	5.62853	-0.310869	-0.940315	-0.561106	-0.519999	31.9861
572	-1.1402	-1.38838	-1.23577	-0.47324	-0.868892	-2.34925	-0.867864	-0.918734	-0.769208	-0.861698	-0.831382	-2.64778	-3.35225	-2.26806	-1.4228	-0.938259	1.57079	-1.43411	-1.27071	3.88252	1.70284	3.06707	-7.21884	-3.94367	-5.57766	-0.101225	-1.88217	4.66355	-0.847825	-0.563161	-1.03589	-0.40747	31.7261
574	-0.537983	-0.588339	-0.44909	-1.24502	-0.458339	-1.9947	-0.397193	-0.536956	0.291857	-0.331422	-1.25838	-2.23466	-2.39652	-1.4711	-0.938259	-0.228142	2.17968	-1.23012	-0.724504	4.50889	2.29272	3.62047	-6.82987	-3.49304	-4.89323	0.201936	-0.622252	4.34549	-0.0436758	0.247668	-0.682884	-0.49996	31.2241
576	0.392569	0.589366	-0.0390515	-1.26917	-0.396679	-2.03324	-0.325257	-0.466561	0.183952	-0.155178	-1.61395	-1.30719	-1.69411	-0.613003	-0.595533	-0.0436758	2.39703	-0.816481	-0.578576	4.81667	2.50596	3.74019	-6.67623	-2.83739	-5.30173	0.740947	-0.752252	4.6728	-0.201936	0.127431	-0.121265	-0.756362	29.9888
578	0.0755335	0.628932	0.0971145	-0.217865	-0.155178	-2.26241	-0.476323	-0.388972	-0.694702	0.252806	-2.25419	-0.796955	-2.58869	-0.716283	-0.747627	-0.471185	2.30865	-0.807746	-0.646402	4.66406	2.49004	3.73505	-6.71323	-2.18636	-6.5375	0.367391	-1.50296	4.30592	-0.560078	-0.468616	0.12332	-0.652054	29.5202
580	-1.25992	-0.0930038	0.809801	1.50553	0.811856	-1.87138	0.194229	0.210671	-0.119209	1.07031	-2.72743	-0.840117	-3.25462	-1.26865	-0.307786	-0.498418	2.59537	-0.811342	-0.122292	4.7956	2.96996	4.52327	-6.14904	-1.47727	-7.2024	0.0714228	-0.99735	3.51359	0.217865	-0.789761	-0.0524109	-0.393082	29.9991
582	-1.8945	-0.751738	0.775888	2.30454	1.12684	-1.62166	0.784109	0.503556	0.503043	0.762529	-2.31328	-0.954188	-2.60462	-1.04925	0.16494	-0.274387	2.92166	-0.779485	0.282094	4.99497	3.33015	5.03145	-5.68967	-1.89091	-7.05442	0.68237	0.205019	3.25976	0.41158	-0.578576	-0.19834	-0.282608	30.9744
584	-1.40739	-1.34727	-0.379209	1.60933	0.498932	-2.29786	0.62071	0.275928	0.238419	0.165454	-1.79687	-1.14379	-1.7311	-0.265652	0.0097628	-0.165454	2.81581	-1.03897	0.14079	4.83568	3.20272	4.65636	-6.05707	-2.70173	-6.56319	1.41612	1.24193	3.28442	-0.147984	0.103794	0.258972	-0.38075	31.8078
586	-0.956757	-2.526	-1.15407	-0.361739	-0.137707	-2.71509	0.251778	0.115099	0.477351	0.300079	-1.25632	-2.02399	-1.24759	-0.539525	-0.0580632	-0.480434	2.51521	-1.51889	-0.0441897	4.5726	3.02699	4.08549	-6.50564	-3.10047	-6.00003	1.71158	0.143873	2.84047	-0.0488142	0.591422	0.351462	-0.649485	31.9599
588	-0.960354	-3.78233	-1.06929	-2.51264	-0.386403	-2.38932	-0.0796441	0.00102763	0.27079	-0.217352	-0.920275	-2.79063	-1.7234	-1.64427	-0.110988	-0.917706	2.30403	-1.83593	-0.273873	4.40047	2.8009	3.88252	-6.56473	-3.63845	-5.61157	1.32158	-2.34925	2.43711	-0.323201	0.277984	-0.0282608	-0.727588	31.6655
590	-0.723477	-3.93904	-0.361225	-2.35181	-0.18498	-1.79636	-0.0575493	0.441897	-0.40747	0.133083	-1.30514	-2.44328	-2.81632	-1.79174	-0.595019	-0.211186	2.44944	-1.58774	-0.223517	4.62912	2.81632	4.22885	-6.15007	-3.63331	-5.34027	0.500987	-1.76091	3.27671	-0.265652	-0.439327	-0.0303162	-0.714228	31.2616
592	0.0256916	-2.55529	0.754821	0.515889	0.422371	-1.17976	0.673635	1.58261	0.769722	2.92371	-1.25016	-1.40996	-2.88877	-0.77075	-0.432647	1.23063	2.9715	-0.930038	0.618655	5.27604	3.42059	5.06074	-5.41734	-2.83533	-5.24881	0.771264	0.894584	5.36853	1.72083	-0.485058	0.319604	-0.86324	30.4205
594	0.995295	-0.443438	1.68948	2.85177	1.26197	-1.10731	1.84004	2.16889	3.17909	4.6394	-0.781026	-0.440355	-2.00395	-0.186008	1.01071	1.71517	3.45604	-0.294426	1.51427	5.78627	4.06699	6.10177	-5.08952	-1.86881	-5.69379	1.80818	1.76091	7.75991	3.3728	0.156205	0.878141	-0.915651	29.2885
596	1.6864	0.617113	1.56257	2.2511	1.913	-1.20751	2.84407	2.0466	4.89529	3.7741	-1.17873	-0.276442	-1.42794	-0.625335	2.60411	1.39043	3.62458	0.051897	1.83182	5.95841	4.37991	6.99635	-5.02734	-1.18439	-5.88647	2.13087	1.56462	8.4654	3.41031	0.604268	1.35344	-0.733754	28.9447
598	1.24348	-0.120751	0.100711	-0.0390514	2.14628	-1.10217	3.35944	2.02604	6.0288	3.26747	-2.27731	-1.27688	-0.983477	-0.952647	3.61482	1.3596	3.54699	-0.252292	2.00806	5.80015	4.45699	7.34884	-4.98315	-1.12478	-5.70663	2.63083	1.12632	5.96406	3.70474	0.966006	1.06775	-0.551343	29.9241
600	-0.318063	-1.66533	-1.29537	-1.82102	1.89296	-1.35241	2.92217	1.82514	5.68967	3.3466	-2.91857	-2.73616	-0.7949	-0.812884	3.40723	1.2481	3.2166	-1.27533	1.87446	5.27501	4.12968	6.71683	-5.36801	-1.60624	-6.22869	2.97664	-0.621224	2.22593	3.77821	0.833437	0.100197	-0.495849	31.443
602	-1.95154	-2.61747	-1.47316	-2.09747	1.06723	-1.78197	1.77016	1.37091	3.38667	3.18268	-2.80347	-3.41956	-1.46237	-0.73992	1.8534	0.939801	2.66011	-2.25264	1.18541	4.78687	3.54134	5.63726	-5.84023	-2.57996	-7.10785	2.38675	-2.52755	0.613517	2.75312	-0.595019	-0.713714	-0.470671	32.0195
604	-2.7449	-2.32818	-1.16178	-1.35344	0.262055	-2.17454	1.07134	1.03075	1.95205	3.41596	-2.06612	-2.93604	-2.34668	-0.785137	0.826758	0.890987	2.21873	-2.51059	0.755335	4.50734	3.14466	5.10596	-6.12129	-3.50999	-7.63248	1.90683	-2.73154	1.82	2.19664	-1.44593	-0.943398	-0.4383	31.4409
606	-2.22849	-0.615058	-1.03024	-0.840117	0.350948	-2.69249	1.23782	0.855532	2.49672	3.5177	-1.23937	-1.84106	-2.9083	-0.812884	1.12118	0.906915	2.09593	-2.13498	0.806718	4.39379	3.08094	5.29043	-6.48457	-3.4211	-7.90018	1.47213	-1.23988	4.04592	2.49928	-0.124348	-0.627904	-0.553398	30.1949
608	-1.01431	1.68075	-0.563161	-0.18498	0.940829	-2.92371	1.57541	0.705493	2.90419	2.54347	-1.04822	-1.13352	-3.02031	-0.965492	1.48652	0.559564	2.1581	-1.56154	0.745572	4.46829	3.0794	5.6573	-6.77232	-2.79936	-7.76402	0.984504	0.0262056	5.58691	2.19355	1.38272	-0.428537	-0.909485	28.7798
610	-0.388458	1.7049	0.220948	0.696758	0.620196	-2.86719	1.34933	0.395138	2.48952	0.823161	-1.57644	-1.49371	-2.13087	-1.35241	1.44079	-0.302648	2.08308	-1.3447	0.326798	4.476	2.79679	5.37829	-6.98762	-2.85691	-7.21936	1.5528	-0.561106	5.60643	1.12221	1.0549	-0.609406	-0.951619	28.5989
612	-0.680829	-1.50193	0.3083	0.242529	-0.746086	-2.78035	0.808259	0.115612	2.08565	-0.13668	-2.33434	-2.51316	-0.969603	-1.8498	1.16692	-0.98656	1.80047	-1.74395	-0.0657706	4.26327	2.45766	4.5762	-7.1022	-3.86505	-6.68343	2.22336	-2.2994	4.67485	0.547232	-0.0220948	-0.815453	-0.55494	29.4915
614	-1.80099	-4.92663	-0.386403	-1.60162	-1.52506	-2.6966	0.67158	0.381778	2.38624	1.20494	-3.046	-3.73916	-0.982449	-2.32664	0.923358	-0.515888	1.5117	-2.61798	0.0549801	3.93185	2.43608	4.27201	-6.94754	-4.68975	-7.00149	1.68589	-2.84715	3.33889	1.43976	-0.773833	-1.42126	-0.297509	30.1224
616	-2.65343	-5.54837	-0.922844	-3.15802	-0.958299	-2.46229	1.24964	1.15612	3.75509	3.97193	-3.37383	-4.50889	-1.35652	-2.11288	1.54099	0.907943	1.64684	-3.27003	0.688537	3.81829	2.78343	4.82849	-6.61663	-4.31003	-7.66742	1.34522	-0.220948	2.31996	3.3841	-1.17771	-1.66687	-0.305217	30.1029
618	-2.10055	-3.73814	-0.600671	-2.79577	-0.10328	-1.98031	1.83747	1.78763	4.83157	5.43533	-2.47257	-3.75355	-1.52557	-1.11656	2.27371	1.85545	2.18174	-2.90162	1.23114	4.28999	3.25359	5.3341	-6.27082	-3.32296	-7.07086	1.51221	2.59332	2.41142	4.47086	-1.03486	-0.604782	-0.382292	29.0855
620	-0.896125	-1.99008	0.14747	-0.816995	0.607865	-1.75628	1.82719	1.7645	4.19699	4.42102	-0.960868	-2.41091	-2.08719	-0.766639	2.09079	1.62731	2.57071	-1.72905	1.11861	4.96979	3.37794	5.44098	-6.12129	-2.41656	-6.24564	1.41561	1.95462	3.2649	3.4843	-0.660276	0.394624	-0.301106	26.8735
622	-0.21581	-1.43359	0.365849	0.305731	0.845769	-2.11442	1.51735	1.04154	2.97869	1.53122	-0.482489	-1.98442	-2.55324	-1.25427	1.88423	0.503557	2.35747	-1.02972	0.451659	4.99703	2.89339	5.47078	-6.43319	-2.36209	-6.58631	1.55691	-0.142846	4.57928	1.33186	-0.350434	0.453715	-0.0940315	25.2272
624	-0.940829	-2.69865	-0.843714	-0.519999	0.0133597	-3.0013	0.702924	-0.146442	1.59802	-1.42691	-1.34778	-2.61747	-2.67502	-1.8683	1.37553	-0.766639	1.45209	-1.89245	-0.604268	4.09011	1.97106	4.94256	-7.36323	-3.54802	-7.73679	1.37861	-0.982449	4.33161	-0.571382	-0.206047	-0.170079	-0.0878655	26.2944
626	-1.93407	-4.15897	-2.98537	-1.46442	-1.03537	-3.53723	-0.478893	-0.788734	-0.151067	-2.09336	-2.2177	-3.21916	-2.44533	-2.06561	-0.091976	-0.933121	0.679287	-3.03624	-1.52197	3.27774	1.31439	3.88869	-8.08876	-4.699	-8.42378	0.430078	-0.320632	2.51007	-1.36988	-0.19577	-0.672094	-0.32577	28.0671
628	-1.80972	-3.57936	-3.31371	-1.64221	-1.08162	-2.87541	-0.760987	-0.163399	-0.539525	-0.326798	-2.39857	-2.84304	-2.13909	-1.45774	-0.991184	0.19834	0.871975	-2.78549	-1.42897	3.45553	1.57387	3.57474	-7.69671	-4.64659	-7.66022	0.0590907	1.22755	2.25624	-0.632015	-0.289288	-0.286205	-0.423399	28.102
630	-1.49012	-2.42735	-1.69308	-1.55846	-0.232253	-2.15964	0.0231225	0.67826	0.57909	1.2368	-2.59229	-2.19972	-2.25419	-1.0513	-0.582173	1.06004	1.49988	-2.04608	-0.660789	4.08703	2.27988	4.45904	-6.91722	-3.85478	-6.64592	0.320632	1.93972	3.41031	0.481462	-0.342727	0.432134	-0.175731	27.6067
632	-1.29846	-0.937232	-0.407983	-0.458339	0.0472727	-2.35747	0.267707	0.430592	0.720908	0.57909	-2.79525	-1.83952	-2.4515	-1.62525	-0.153636	0.0909485	1.62114	-1.73316	-0.654109	4.38711	2.30814	4.80896	-6.82114	-3.38102	-6.26106	0.501501	-0.62071	4.8809	-0.0729642	-0.296482	0.295454	-0.180355	26.4922
634	-0.930038	1.36525	0.368418	1.20391	-0.408497	-2.66731	-0.467074	-0.125375	-0.281067	-0.274387	-2.66063	-1.66585	-2.15964	-2.35747	-0.513319	-1.29435	1.37348	-1.68332	-1.26454	4.39276	1.87498	3.85529	-7.03489	-3.17343	-6.83398	0.840631	-3.62869	6.33659	-1.18336	0.0847825	-1.00454	-0.653082	24.2
636	-0.340671	2.97509	0.830868	1.43154	-0.214782	-2.87284	-0.780512	-0.0467588	-0.366363	0.445493	-2.21205	-1.39249	-1.48241	-2.47102	-0.952647	-1.21008	1.40688	-1.65249	-1.3447	4.53972	1.97929	3.54185	-7.1171	-2.75106	-8.21671	1.1217	-2.70482	7.18544	-0.75739	0.798497	-1.38889	-0.936718	22.5079
638	0.330909	3.10869	0.163399	0.391027	0.384347	-2.93399	-0.216324	0.0241502	0.54826	1.3	-1.75371	-1.23628	-1.22857	-2.15142	-0.796955	-0.667469	1.70336	-1.37245	-0.988615	4.74422	2.33434	4.46059	-7.2692	-2.74233	-8.00706	1.16178	-0.53079	7.48552	0.33913	0.818022	-0.385375	-0.758418	22.4221
640	0.420315	1.37553	-0.841145	-0.679287	0.492766	-2.32509	0.461936	0.009249	1.36474	1.34059	-1.82565	-1.63913	-1.24502	-1.86008	-0.231225	-0.583201	2.05071	-1.20288	-0.697785	4.93023	2.52806	5.349	-7.11196	-3.03316	-5.99438	1.37553	0.267707	6.75125	0.80158	0.269762	-0.110474	-0.419288	23.5582
642	0.0755335	-1.30257	-0.450632	-1.04051	0.453201	-2.00189	0.62071	0.0251779	1.60367	0.515374	-2.09181	-1.80458	-0.852963	-1.26352	0.0996835	-0.536956	2.25316	-1.12016	-0.679801	5.14039	2.57482	5.5494	-6.90695	-2.93964	-5.70098	1.53276	1.24553	5.42505	0.490711	0.198853	-0.270276	-0.206047	24.4209
644	-0.215296	-2.69814	0.379723	-0.475296	0.313952	-2.70739	0.0267194	-0.227114	0.591422	-0.285177	-1.71672	-1.71055	-0.884307	-0.567272	-0.538497	-0.512292	2.08257	-0.992726	-1.01533	5.10288	2.32715	4.80691	-7.30054	-2.89905	-7.64738	0.879682	1.68589	4.76889	-0.374584	0.237391	0.0282609	-0.154664	24.0417
646	-0.700354	-2.08668	-0.114585	0.115099	-0.0626876	-2.92577	-0.844228	-0.383319	-1.61703	-0.329881	-1.53071	-1.87395	-1.92893	-0.565216	-1.94589	-0.571896	1.87857	-1.12273	-1.51118	5.06948	2.17043	3.81521	-7.48552	-3.07169	-8.18588	-0.290829	0.569841	4.82489	-1.37296	-0.451659	0.415691	0.0303162	23.3558
648	-1.13506	-1.26403	-0.674149	0.159802	0.0852963	-1.93715	-0.478892	0.199367	-1.77529	0.531303	-2.04814	-1.72648	-2.61695	-0.607351	-2.00446	-0.253834	2.41604	-1.03178	-1.09601	5.52628	2.77316	4.20213	-6.73121	-2.77727	-6.72248	-0.269762	-0.353517	4.9328	-0.909485	-0.626876	0.938259	0.512805	23.4472
650	-0.59245	-1.22138	0.624307	0.304189	1.14431	-0.979366	1.04154	1.22549	0.758932	1.56514	-1.82359	-1.35703	-2.07948	-0.436244	-0.333478	0.409011	3.39746	-0.496363	0.174703	6.21995	3.80031	5.76213	-5.71485	-1.97312	-5.59256	1.16075	-0.184466	4.84031	0.809801	0.261027	1.13403	0.810829	23.9436
652	0.507667	-1.12324	2.32407	0.439841	1.37759	-1.38016	1.27533	1.25427	1.51581	1.02869	-0.711659	-1.37399	-0.893042	-0.748141	0.179842	0.223517	3.42367	-0.428537	0.323201	6.2924	3.90308	5.93734	-5.70817	-1.88423	-5.62904	1.73265	-0.197312	4.57979	0.846283	0.606323	0.912054	0.529248	23.7324
654	0.604782	-1.85699	2.1766	0.145415	0.247154	-2.56249	0.165454	0.286719	0.293399	0.105336	-0.634584	-1.85134	-0.411067	-1.21984	-0.594505	-0.832924	2.55581	-0.934663	-0.680829	5.58588	3.10098	4.569	-6.6526	-2.7598	-6.38386	1.20597	-1.30873	3.566	-0.235849	0.0529247	0.448576	0.182411	23.1759
656	-0.220948	-3.51873	1.03435	0.359169	-0.137194	-2.80245	-0.26411	-0.129486	-0.335533	0.311897	-1.35806	-2.26292	-0.730157	-1.35806	-0.550315	-1.24707	2.15553	-1.28972	-1.12838	5.06485	2.64932	4.05774	-7.17311	-2.79525	-7.01434	1.34984	-2.08565	2.7896	-0.571896	0.003083	-0.040079	-0.0087352	23.0023
658	-0.869406	-4.23912	0.402331	0.360197	0.396679	-2.39755	-0.0596046	-0.0241501	-0.692133	0.372015	-1.19312	-2.47616	-0.932093	-1.43771	-0.19577	-1.0698	2.24185	-1.31387	-1.04411	5.04019	2.60616	4.39893	-7.2137	-1.80972	-6.66288	1.45055	-2.26909	3.21608	-0.819564	0.670038	-0.0195258	-0.492252	22.4098
660	-1.2779	-4.12762	0.0786165	-1.17411	0.210158	-2.47359	-0.11664	-0.343754	-0.830868	-0.343754	-0.65411	-2.83173	-1.27636	-1.86316	-0.329367	-1.31593	1.98545	-1.21316	-1.26454	4.96311	2.29478	4.39533	-7.5405	-2.28142	-5.97023	0.416205	-2.38778	3.65438	-1.22549	0.58577	-0.219407	-1.14739	20.6638
662	-1.18336	-3.72991	0.00462456	-2.56403	-0.436758	-2.90675	-0.0272331	-0.885335	-0.156719	-1.36731	-0.569841	-2.92936	-1.43308	-2.25573	0.0750197	-1.95514	1.61087	-0.739406	-1.55178	4.9328	1.98031	4.67434	-7.85291	-4.04695	-6.09766	0.359169	-1.72185	4.10707	-1.38016	0.457312	-0.688536	-1.46854	18.5422
664	-0.244071	-2.04865	0.329881	-2.0168	-0.361739	-3.00181	0.485058	-0.803635	1.22806	-1.51889	-0.660789	-2.44379	-0.982449	-2.08154	1.03948	-2.01525	1.72031	-0.0298023	-1.28767	5.19794	2.28193	5.3413	-7.56157	-4.43798	-6.37359	1.48446	-0.811342	5.16813	-0.785137	0.850908	-0.613003	-1.53276	17.3285
666	0.429565	0.969089	0.283122	-0.234308	-0.0554939	-2.92525	0.647943	-0.104308	2.11648	-0.330909	-0.927469	-1.88423	-0.560592	-1.65352	1.1664	-0.87403	1.9351	-0.193201	-0.842173	5.17892	2.63545	5.26268	-7.0688	-3.81727	-6.62382	1.46134	-0.747113	6.72094	0.170592	0.611975	-0.298537	-1.56308	17.385
668	0.410039	3.4098	-0.376126	0.638695	-0.186521	-3.11537	0.324229	0.31909	2.16786	0.820592	-1.0179	-1.49474	-0.811343	-1.43359	0.638181	0.49328	1.87035	-1.15356	-0.710118	4.78481	2.56249	4.63426	-7.00149	-3.70833	-7.2656	0.989643	-1.42435	8.44742	0.71988	0.29083	-0.348893	-1.34522	18.051
670	0.374071	3.90821	-0.916678	0.529762	-0.319604	-3.05782	0.295968	0.226087	2.53885	1.01379	-0.49739	-1.36988	-1.41458	-1.44593	0.855532	0.434189	1.95873	-1.54612	-0.637667	4.76889	2.5445	4.56798	-7.13046	-3.69086	-7.5143	1.73984	-1.42537	8.82354	1.09035	0.246126	-0.892014	-0.918734	18.2611
672	0.515888	2.80296	-0.815967	1.34624	-0.058063	-2.78754	0.696758	0.285691	2.91035	1.32055	-0.37407	-1.42743	-1.2928	-1.56205	1.6083	-0.497904	2.31174	-1.09138	-0.395138	5.10391	2.77573	5.18715	-7.03129	-3.22379	-7.31185	2.7526	-0.927983	7.49323	1.46237	0	-1.17462	-0.769722	17.7139
674	0.285691	0.900236	-0.306758	2.10004	0.118695	-2.96584	0.754307	0.500474	1.95462	2.07743	-1.14174	-1.81691	-0.572924	-1.60008	1.37245	-0.690592	2.37494	-1.12735	-0.309841	5.03556	2.92422	5.38754	-7.03181	-2.77932	-7.38378	2.35541	-2.40217	5.80015	1.35857	-0.13411	-0.88739	-0.759445	17.6861
676	-0.653596	-0.821105	-0.601185	0.515888	-0.385889	-3.76999	0.0364821	0.0251779	-0.103794	1.97826	-2.20332	-3.13541	-0.857074	-1.40276	0.179328	-0.648457	1.80407	-2.32818	-0.831382	4.33418	2.51213	4.55256	-7.726	-3.14415	-8.01734	1.05541	-3.36407	4.54023	0.367391	-0.336047	-0.793358	-0.630473	18.3855
678	-1.74446	-1.87395	-1.93098	-1.97055	-0.949564	-4.31723	-0.490197	-0.308814	-0.908457	1.99624	-3.36252	-4.51248	-1.99059	-1.15253	-0.484031	-0.172648	1.3149	-3.39849	-1.1813	3.76486	2.03375	3.85015	-8.31022	-3.91387	-8.17663	0.402331	0.024664	4.20418	-0.0601184	-1.19826	-0.861184	-0.448576	18.8469
680	-2.45201	-3.28545	-2.65189	-3.18217	-0.803635	-4.01561	-0.0868377	0.241502	0.462964	2.90367	-3.97296	-4.49912	-2.2547	-1.15047	0.0364821	0.731185	1.4968	-3.53723	-0.727588	3.92774	2.23106	4.18723	-8.00449	-4.15691	-7.29643	0.809801	2.5928	4.27252	1.07031	-1.90581	-0.679287	-0.3566	19.1526
682	-2.59229	-4.74628	-2.50391	-3.03727	-0.751224	-3.89074	0.180355	0.284664	2.07023	2.78652	-3.27517	-3.64462	-1.25067	-1.59802	0.795927	0.285691	1.53482	-3.42829	-0.565216	4.00841	2.25213	4.38865	-7.89145	-4.35011	-7.48706	1.50964	-0.467074	4.18568	1.94434	-1.33031	-0.660276	-0.588339	18.9049
684	-2.16272	-4.1826	-1.98802	-1.69359	-0.816995	-4.04952	-0.0046243	-0.339644	2.82608	1.35395	-2.37905	-2.83893	-0.508695	-1.8647	1.04514	-0.841145	1.19004	-3.11588	-1.00711	3.7628	1.86778	4.1677	-8.19821	-4.52584	-8.76137	1.51375	-3.79055	4.28023	1.64786	-0.214782	-0.405414	-0.815967	17.3866
686	-0.929524	-2.11905	-0.952647	-0.213754	-0.566758	-3.62612	0.203478	-0.410039	3.07786	0.450118	-2.23055	-2.13498	-0.86324	-1.6494	1.17	-0.673635	1.1402	-2.15142	-1.12684	4.01509	1.95513	4.43541	-7.99987	-4.21138	-8.42224	1.46956	-1.84004	4.66149	1.20956	0.540553	0.408497	-0.6166	15.1596
688	0.119723	-1.98391	-0.421857	0.188063	-0.5683	-2.95249	0.526165	-0.110474	2.60719	0.281581	-2.36826	-1.91865	-1.20237	-1.52865	1.24553	0.300078	1.28664	-1.45415	-0.973714	4.36296	2.16992	4.78841	-7.57904	-4.09576	-6.98248	1.83284	1.83747	4.46778	0.90075	0.40747	0.689564	-0.0549802	13.9752
690	-0.632529	-4.58339	-1.16948	-0.0143874	-0.765611	-2.85126	0.566244	0.125889	1.71929	0.385889	-2.53217	-2.37802	-1.36166	-1.39403	0.936204	0.920275	1.21624	-2.03632	-0.964465	4.12094	2.11905	4.98572	-7.36683	-4.65173	-6.75434	1.55537	2.16118	2.83533	0.693675	-0.843714	0.0184981	0.523082	14.8724
692	-2.06664	-6.03086	-2.20486	-0.377154	-1.02767	-3.2911	0.145415	0.266166	0.666441	1.11091	-2.35438	-2.62774	-1.6828	-0.983991	0.202964	1.10577	0.917192	-2.87541	-1.17514	3.62818	1.96079	4.65944	-7.37762	-5.26936	-7.70185	0.982963	0.363794	1.46083	0.679801	-1.38478	-0.91154	0.737864	15.7331
694	-2.1396	-4.47497	-2.21	-0.783596	-1.17719	-3.65438	-0.417233	0.167509	0.20913	2.03683	-1.9315	-2.39652	-2.11237	-0.880196	-0.24664	0.883793	0.644347	-2.79936	-1.3894	3.4062	1.68948	3.88047	-7.56208	-5.06383	-8.53374	1.0215	-0.578062	2.11597	0.730671	-1.02921	-1.50604	0.544149	14.7568
696	-1.14225	-2.23826	-1.48087	-0.592963	-0.778971	-3.36869	-0.0246639	0.10996	1.7383	2.42632	-2.02913	-2.33743	-2.25676	-1.20905	0.447035	0.453201	0.807746	-2.14679	-1.0734	3.66003	1.8051	4.10347	-7.48347	-4.26841	-8.33643	1.38324	-0.698299	3.10458	1.36423	-0.938773	-1.02972	0.237391	13.4167
698	-0.344268	-1.25735	-0.732726	-0.16751	0.0056522	-2.84458	1.0698	0.137193	3.46169	1.51581	-2.27936	-2.35849	-1.48652	-1.15818	1.68691	0.027233	1.4151	-1.58929	-0.527193	4.17746	2.38778	5.31047	-7.35655	-3.52901	-7.28513	1.43719	-1.12478	2.88055	1.76502	-0.260513	0.100197	0.033913	13.1413
700	-0.316521	-1.4711	-0.0606323	-0.183438	0.360711	-3.06193	1.39557	-0.0703952	3.31217	0.237905	-2.67553	-2.3996	-0.864267	-0.890473	2.15142	-0.31241	1.61446	-1.74703	-0.507153	4.37991	2.59229	5.89212	-7.76916	-3.2875	-6.44758	1.28047	-0.958813	2.90213	1.23063	0.569327	0.240474	-0.102253	13.6561
702	-1.1551	-2.20332	-0.208616	-0.758932	-0.318063	-3.63023	0.654623	-0.107905	2.23877	0.910512	-3.3209	-2.61798	-0.423912	-0.890473	1.36834	-0.103794	1.23269	-2.74695	-0.777429	4.09319	2.30351	5.13319	-8.19667	-3.85478	-6.6007	1.44952	0.438814	3.8481	1.03794	0.967548	-0.262055	-0.0200395	14.4978
704	-2.33589	-2.47102	-1.26557	-1.61087	-1.35703	-3.7515	-0.278498	0.0667984	1.51684	2.52446	-3.45553	-2.84304	-0.437786	-1.08316	0.0621738	0.135652	0.926955	-3.50075	-0.973714	3.68521	2.05533	3.86711	-8.19358	-4.75912	-7.5256	1.33905	0.0673121	4.36758	1.29178	0.858615	-0.220434	0.367905	14.5744
706	-2.96276	-1.49063	-1.78095	-1.56205	-1.33802	-3.15442	-0.34992	0.433675	1.68486	3.11845	-3.12154	-2.71098	-1.47059	-1.54921	-0.29494	0.251264	1.18541	-3.14928	-0.834979	3.79517	2.33743	3.65695	-7.60422	-4.86549	-7.48192	1.12478	-2.22336	3.98632	1.52608	0.0955729	0.0611461	0.490197	13.428
708	-2.65138	-0.365335	-1.2034	-0.7466	-0.657706	-2.36363	0.0215807	0.754307	2.09901	2.36363	-2.22387	-1.93921	-1.86676	-1.88834	0.158774	0.591422	1.7013	-2.18944	-0.563675	4.34703	2.80347	4.08754	-6.89204	-4.29359	-6.29908	1.02047	-2.03324	3.86762	1.34522	-0.143359	0.364821	0.156719	12.3597
710	-2.0579	0.490711	-0.202964	-0.0015415	-0.576007	-2.4145	-0.379723	0.0385374	1.62525	0.360711	-1.15869	-1.1551	-1.91608	-1.80407	-0.144901	0.240474	1.58209	-1.40739	-1.06261	4.56078	2.53371	3.92106	-7.22038	-4.12711	-5.7575	0.0390514	0.240988	4.85521	0.159802	-0.388972	0.563161	0.0693675	11.3449
712	-1.51067	1.58415	0.732726	1.06261	-0.465533	-2.82865	-0.800038	-0.83909	1.01636	-0.72656	-0.593991	-0.806718	-2.00755	-1.64478	-0.721936	-0.379723	1.26249	-0.7949	-1.6417	4.66509	2.15759	3.94418	-7.91149	-3.59015	-5.94042	-0.339644	0.820078	6.29394	-0.555968	-0.779485	0.471185	0.194229	9.74485
714	-0.363794	2.19921	1.27688	2.47102	-0.0457313	-2.6411	-0.779485	-0.697785	0.419802	-0.0405928	-0.203478	-0.274901	-1.8647	-1.5117	-1.0698	-0.208616	1.53328	0.0837548	-1.53019	5.15889	2.38367	4.20316	-7.65354	-2.5183	-5.77703	0.137707	-0.015929	6.96244	-0.405414	-0.29494	0.890473	0.0128458	8.06204
716	0.65822	1.28921	1.1068	2.86102	-0.0976282	-2.22079	-1.24245	-0.443438	-1.20288	0.325257	-0.512805	0.0087352	-2.00909	-1.21778	-1.82822	0.0981422	1.77478	0.738378	-1.54921	5.49236	2.44071	3.73968	-7.1803	-2.5111	-5.00114	-0.0287747	-0.528734	6.73738	-0.977311	0.253834	1.41561	-0.297509	7.07651
718	0.727588	-0.962923	0.254861	2.0615	-0.518971	-2.55478	-1.68743	-0.555968	-2.08976	0.201936	-1.93766	-0.490711	-1.99676	-0.876599	-2.10826	0.119723	1.55794	0.553398	-1.77992	5.26217	2.13857	3.09173	-7.45932	-3.49458	-4.7396	0.015415	-0.717311	6.41829	-1.36885	0.321146	1.23782	-0.435731	7.72497
720	0.299051	-3.07426	-0.532845	0.895097	-0.859643	-3.0943	-1.27585	-0.22917	-0.764584	1.03692	-3.00695	-1.33494	-1.65095	-0.706007	-1.48292	0.387944	1.34059	-0.239446	-1.50759	4.76991	2.13344	3.21094	-7.7373	-4.17181	-5.84177	0.629959	-0.430078	5.92604	-0.155692	0.384861	0.896125	-0.267707	9.79006
722	-0.50664	-4.14509	-0.712687	-0.488655	-0.780513	-2.98897	-0.594505	0.535414	1.10937	2.45407	-2.88055	-2.37905	-1.36577	-0.589367	-0.891501	0.891501	1.43308	-1.09087	-0.9249	4.47138	2.4366	3.85015	-7.43568	-4.15023	-6.90695	0.840631	0.357114	5.0628	1.46545	0.199367	0.600671	-0.040079	11.4631
724	-1.16332	-4.15229	-0.648457	-1.03743	-0.177272	-2.8564	-0.216324	0.919247	1.88782	2.99256	-2.55992	-2.94118	-1.39506	-0.520513	-0.619683	1.14071	1.67612	-1.75834	-0.669011	4.54691	2.70173	4.41383	-7.24351	-3.59992	-6.50461	0.584742	0.934662	4.68975	1.91197	-0.834979	0.582687	-0.21581	11.5058
726	-1.03537	-3.24794	-0.390513	-0.429051	0.286205	-2.74798	0.0262056	0.813398	1.84929	2.40371	-2.35079	-2.64778	-1.50604	-0.601185	-0.19166	1.05387	1.89296	-2.23106	-0.710631	4.7992	2.94169	4.71545	-7.21165	-2.93347	-5.56122	0.712687	0.561106	4.89786	1.51992	-1.37245	0.713714	-0.405928	10.6564
728	-0.707034	-2.11699	-0.0005138	-0.350434	0.160316	-2.70225	0.230711	0.666955	1.74189	1.74138	-1.5451	-2.25573	-1.46083	-0.508181	0.275415	0.630473	2.03118	-2.31482	-0.664386	4.93742	3.21762	4.84802	-7.19777	-2.85023	-5.51497	1.02099	-1.33288	4.75707	1.33905	-0.566244	0.433675	-0.248181	10.1533
730	-0.375612	-1.20237	-0.0637153	-0.653082	-0.0991699	-3.14517	0.121265	0.659762	1.39968	1.57952	-1.16846	-2.05379	-1.52608	-0.521027	0.10996	0.294426	2.0615	-1.97363	-0.622766	4.82232	3.31731	4.78636	-7.37916	-3.20529	-6.43576	0.70241	-2.63648	4.54794	1.26146	-0.0914624	-0.0611462	-0.155178	9.62666
732	-0.128458	-0.641778	-0.0426481	-0.191146	-0.0986559	-3.65284	0.0236362	0.563675	1.17565	1.32569	-1.95719	-2.14217	-1.47213	-0.936204	0.0883793	0.340671	2.08668	-1.40122	-0.722449	4.64916	3.22019	4.73292	-7.69568	-3.30343	-7.4922	0.920789	-1.60778	4.43695	0.943398	-0.100197	-0.40079	-0.283122	9.00441
734	-0.657192	-0.639209	0.234822	0.506126	0.597074	-3.60403	0.624821	0.587825	1.96593	1.63604	-2.14063	-2.53525	-1.1032	-1.20648	1.04308	0.381778	2.38213	-0.857074	-0.488142	4.85007	3.48379	5.41529	-7.76248	-2.87747	-7.45777	2.07948	-0.917192	4.37169	1.20443	0.0488141	-0.567786	-0.507667	8.64884
736	-1.24553	-0.926441	0.396679	1.61138	2.00806	-2.58715	1.60778	1.33442	3.36304	3.16881	-1.4562	-2.33537	-0.0328853	-1.01379	1.88474	1.02612	3.09122	-0.156719	0.316007	5.74722	4.42564	6.56114	-6.99224	-1.72185	-5.5345	2.70225	-0.690078	4.72418	2.55735	0.511778	-0.649485	-0.731185	7.55283
738	-0.7949	-0.820078	0.329367	2.62569	2.55067	-1.93561	1.82925	1.4932	3.85375	3.10612	-1.47008	-1.08419	0.956243	-0.698299	1.5266	1.39197	3.36663	0.484031	0.514861	6.32683	4.82592	6.76718	-6.49125	-1.19158	-4.58442	2.22644	0.796441	5.11007	2.94837	1.01636	-0.382292	-0.95316	5.62082
740	0.0205532	0.182925	-0.0143872	1.86778	1.55229	-2.90984	1.08419	0.175731	2.77367	0.761501	-1.98699	-0.230197	0.163399	-0.917706	0.701382	0.11253	2.63905	0.373043	-0.37664	5.72616	4.0007	5.95327	-7.33034	-1.94948	-6.49639	1.51272	1.39454	5.61722	1.43514	0.758418	0.30162	-1.16383	4.37221
742	0.44241	1.56411	0.0714228	0.949564	0.4383	-3.63999	0.189091	-0.727588	1.12273	-0.578062	-1.84466	-0.496363	-0.730157	-1.5302	0.348893	-0.883279	2.01577	-0.000513866	-1.14636	4.94873	3.16573	5.02529	-8.06718	-2.31893	-7.47987	1.76296	0.419288	6.35149	0.0811855	0.49328	0.879682	-1.1962	4.64608
744	0.5683	1.9613	0.449604	1.46648	-0.46656	-3.19656	-0.711659	-0.717825	-0.165454	-0.546205	-1.30873	-0.939801	-0.0426482	-2.14936	-0.0462448	-0.9732	1.8832	-0.0354544	-1.53328	4.69335	2.81529	3.86814	-8.04406	-2.83739	-6.45529	2.25316	-1.1813	6.72042	-0.547232	0.9249	0.895097	-0.970631	5.27552
746	0.342727	0.456284	0.120237	1.22909	-1.30976	-2.99924	-1.50502	-0.736837	-0.792331	-0.120237	-1.17719	-1.60213	0.168023	-2.41245	-0.855532	-0.983991	1.57747	-0.461422	-1.87138	4.476	2.61233	2.86719	-8.06564	-4.35885	-6.11821	1.52763	-2.20332	6.03035	-0.813398	0.807232	0.480434	-0.578576	5.69687
748	0.10996	-1.26043	-0.83241	-0.829327	-1.28201	-3.67545	-1.70798	-1.0251	-1.42897	0.06166	-1.34008	-2.58972	-1.24296	-2.17557	-1.53122	-0.830868	1.13865	-1.48549	-2.22541	4.03205	2.40474	3.07221	-8.51113	-5.15888	-6.82011	0.448576	-1.26865	4.80948	-1.12427	-0.289802	0.00873523	-0.370987	5.98205
750	0.587311	-0.966006	-1.75525	-2.39189	-0.926441	-4.21754	-1.82102	-1.51324	-2.31687	-0.885848	-1.38427	-2.99	-2.49055	-1.80407	-2.03221	-0.862726	0.803635	-2.17506	-2.79268	3.58912	1.9649	3.48482	-8.9186	-5.04944	-7.26098	-0.0364822	0.0642292	4.90145	-1.91403	-0.900749	-0.305731	-0.513319	5.66347
752	0.767667	-0.788734	-2.31482	-2.83533	-1.13711	-4.43541	-2.14371	-1.85802	-2.41502	-1.65454	-1.41304	-2.90727	-2.55272	-1.45261	-2.26549	-1.1813	0.40747	-2.75312	-3.22379	3.20015	1.523	3.16881	-9.14829	-4.99189	-7.7152	-0.391541	-0.565216	5.22363	-2.21411	-0.682884	-0.012332	-0.466047	6.29035
754	-0.223004	-2.55632	-2.2398	-2.90984	-1.64067	-4.82541	-2.33743	-2.00909	-1.8611	-1.39814	-1.51581	-2.98743	-2.43351	-1.50091	-1.92019	-1.5045	-0.0452174	-3.34814	-3.31525	2.7526	1.28304	2.80039	-9.49923	-5.14758	-8.24497	-0.58988	-2.35027	4.02588	-1.82873	-0.335019	0.476837	-0.181897	7.91817
756	-1.17154	-4.51762	-1.35909	-1.95308	-1.43565	-4.45596	-1.8128	-1.4562	-0.491224	0.0113044	-1.46751	-3.03521	-2.11391	-1.74549	-0.883279	-1.15612	0.216838	-2.92731	-2.79525	2.97098	1.63553	3.13335	-9.20635	-4.84031	-7.49683	0.122806	-2.26549	2.98743	-0.572924	0.234822	0.534386	-0.218379	8.13809
758	-1.03537	-4.78841	-0.183952	-0.281067	-0.638181	-3.48071	-0.755335	-0.199881	1.43873	2.13138	-1.21522	-2.79525	-0.846283	-1.45158	0.516402	-0.166996	1.11193	-1.68178	-1.77272	3.93236	2.49928	3.89074	-8.19307	-3.93134	-6.14801	1.47933	-0.636125	4.15229	1.19415	1.05952	0.242529	-0.529248	6.43525
760	-0.143873	-2.07537	0.429565	1.12992	-0.283636	-2.83122	-0.128972	0.585256	2.48336	2.80964	-1.24707	-1.83233	0.581659	-0.664386	1.38016	0.655137	1.66019	-0.639722	-1.22395	4.64711	2.95403	4.26225	-7.5405	-3.45142	-5.56687	2.41656	0.75071	7.19007	1.86419	1.68948	0.332964	-0.605809	4.02794
762	-0.253834	0.714742	0.420829	1.10885	-0.375098	-2.91292	-0.196284	0.282608	2.71921	1.69976	-2.05122	-1.3262	0.618655	-0.268221	1.42897	0.92233	1.46956	-0.896639	-1.41664	4.52944	2.69608	4.26841	-7.78611	-3.62098	-6.27339	2.57328	1.56411	8.86259	1.60881	1.17822	0.68494	-0.142846	3.7443
764	-1.8498	-0.412094	-0.117668	-0.439327	-0.973714	-3.91438	-0.982449	-0.725019	1.84158	0.0847824	-2.42581	-2.39138	-0.784623	-1.12529	0.506639	0.324743	0.566244	-2.44687	-2.26703	3.5475	1.78557	3.66363	-8.72591	-4.32545	-7.91303	1.47881	1.08984	7.15718	0.77743	0.0071936	0.161344	0.311897	5.57098
766	-2.74079	-3.24999	-1.09138	-0.9732	-1.49371	-4.40252	-1.67047	-1.29075	0.104308	-0.929524	-1.53842	-3.15648	-1.92379	-2.39035	-0.487114	-0.583201	-0.0662845	-3.11229	-2.97972	2.91395	1.14585	3.0347	-9.20635	-4.85213	-8.40682	-0.149012	-0.565216	4.17181	-0.388972	-0.525651	-0.54826	0.0626877	5.9024
768	-2.07486	-4.35885	-1.68486	-0.221976	-1.25118	-3.74687	-1.36423	-0.979366	-0.925414	-0.417233	-1.11142	-2.90162	-2.0132	-2.61747	-0.396679	-0.815967	0.233794	-2.34205	-2.84355	3.25924	1.40636	3.5177	-8.84872	-4.50991	-7.16694	-0.330395	-1.8015	2.0615	-0.864781	-0.614031	-0.506639	-0.413122	4.36604
770	-1.16589	-3.82857	-1.6679	-1.06672	-1.04668	-3.55213	-1.13814	-0.851422	-1.4783	0.161344	-1.98494	-3.00798	-1.96079	-2.16427	-0.300079	-0.666442	0.366363	-1.85237	-2.786	3.43806	1.46391	3.99557	-8.8035	-4.10912	-6.41418	0.427509	-2.1211	1.86162	-1.20134	-0.974228	-0.37664	-0.445493	2.72434
772	-0.434189	-2.42221	-1.58826	-3.1128	-1.22292	-4.40766	-1.5564	-1.42332	-1.82411	-0.940828	-2.85126	-3.68161	-2.15707	-2.06201	-0.912568	-0.790275	-0.189091	-2.27217	-3.28494	3.00181	0.927983	3.6811	-9.45042	-4.52276	-6.73738	0.254347	-1.94229	3.74584	-2.03735	-1.34059	-0.957271	-0.337588	1.89193
774	0.341185	-0.795928	-1.23063	-2.89596	-1.0179	-5.08284	-1.36577	-1.70541	-0.629959	-1.56051	-2.45869	-3.79517	-1.86316	-2.29375	-0.607865	-0.877113	-0.470157	-2.64213	-3.24691	2.71253	0.859643	3.7777	-9.79315	-5.06691	-7.51841	-0.0025691	-1.13197	5.96201	-1.61292	-1.15201	-1.70336	-0.53079	1.99727
776	0.16751	-0.583714	-0.746086	-0.441896	-0.622766	-4.76169	-0.397707	-1.00197	1.5302	0.423912	-1.78454	-3.1313	-0.712687	-2.33023	0.885848	-0.451145	-0.198339	-2.46743	-2.32921	2.85332	1.36577	4.34651	-9.35176	-4.88912	-8.49777	1.30719	-0.948536	6.23948	0.590908	-0.716283	-1.62371	-0.734268	2.40371
778	-1.49885	-1.79174	-1.06107	0.700868	-1.02201	-4.41229	-0.100711	-0.354031	2.27474	2.68529	-2.29992	-2.7711	0.292371	-1.95873	1.54458	0.126917	-0.139249	-2.44225	-1.7013	2.92474	1.55075	4.11734	-9.04244	-4.89889	-8.82611	2.86102	-1.48189	4.25762	2.12984	-0.316521	-1.05901	-0.589367	2.7598
780	-3.34351	-2.40063	-1.98802	-0.450118	-1.64632	-4.81102	-0.562134	-0.589367	1.75525	2.44687	-2.99359	-3.35893	-0.381778	-1.88217	1.07597	-0.124861	-0.473754	-2.84201	-1.98288	2.71253	1.26865	3.54493	-9.3754	-5.15426	-8.7552	2.75877	-1.74601	2.31071	1.72853	-0.157747	-0.964465	-0.16083	2.83071
782	-3.34865	-1.66431	-2.37545	-1.06312	-1.17411	-4.85778	-0.598102	-0.934662	1.37502	0.731185	-2.88415	-3.62201	-2.05944	-2.41245	0.768694	-0.822647	-0.416205	-2.71098	-2.27011	2.78857	1.25118	3.93802	-9.48844	-4.67588	-8.24651	1.66071	-2.05996	2.93245	0.650513	-0.319604	-0.993239	0.0781027	2.10569
784	-1.59494	-1.18284	-1.85237	-1.16846	-0.195257	-4.29462	-0.064743	-0.741975	1.46699	0.773319	-2.47822	-3.01106	-2.88209	-2.5332	0.895097	-0.603754	0.152095	-1.79585	-1.87498	3.2726	1.7049	4.90248	-9.08303	-4.10861	-7.29592	1.34008	-1.8647	5.01141	0.715256	-0.370474	-0.731698	-0.0786165	1.01071
786	-0.511264	-1.68794	-1.02767	-1.70233	-0.168537	-4.02999	0.35249	0.033913	2.60565	3.52952	-2.39857	-2.55118	-1.72648	-1.7234	1.30154	0.821105	0.636639	-1.07597	-1.01071	3.65901	2.2732	5.05817	-8.61184	-4.19391	-7.1171	2.22798	-0.567786	5.81248	2.60924	-0.367905	-0.602212	-0.200395	0.946481
788	-0.865295	-1.33545	-0.0637152	-0.667469	-0.800038	-4.22731	0.324743	0.694189	3.86403	5.15426	-2.2177	-2.23774	0.572924	-1.00917	1.68897	1.86573	0.785651	-0.668497	-0.460394	3.83782	2.47308	4.27458	-8.38062	-4.23347	-7.69414	2.67502	0.325256	5.61363	3.87893	0.101739	-0.306244	-0.19834	1.27482
790	-1.60881	-0.446007	0.129486	0.600671	-1.05387	-4.18055	0.0467588	0.480948	3.6477	3.26181	-1.62782	-2.10106	1.20134	-1.66842	1.79379	1.44644	0.679801	-0.566758	-0.676204	3.89794	2.27423	3.76897	-8.39809	-4.05569	-7.43311	2.26652	-0.26	4.6173	2.71921	1.29897	-0.236363	-0.376126	1.0364
792	-1.99573	-1.23423	-1.27225	-0.716283	-1.04257	-3.79209	-0.138221	0.277984	2.79371	1.53996	-1.30205	-2.87284	-0.137194	-2.75209	1.7198	1.19363	0.425968	-1.3966	-1.02869	3.54339	2.12316	4.06493	-8.29995	-4.34908	-6.67161	2.03221	-1.17873	2.71355	1.49114	1.74446	-1.02356	-0.641778	1.37091
794	-1.56051	-3.36201	-2.57019	-2.74644	-1.43822	-4.41794	-0.464505	0.124347	2.27936	1.8164	-1.25581	-4.1307	-1.47984	-2.78035	1.29075	1.2183	-0.150553	-2.73102	-1.43565	2.56917	1.77838	4.18106	-8.69046	-5.27244	-7.8154	1.75063	-2.4294	1.36885	1.46545	0.955216	-1.59597	-0.810829	2.46897
796	-0.617627	-4.20264	-2.66371	-2.67758	-1.91454	-5.85307	-1.17051	-0.845769	1.73008	1.61087	-1.17668	-4.41845	-2.01834	-2.41604	0.673635	-0.214268	-0.882251	-3.38513	-2.15913	1.80818	1.12632	3.59375	-9.83579	-5.9728	-9.76232	1.3894	-4.45802	2.0132	1.19877	-0.163399	-1.24656	-0.746086	2.94375
798	0.196284	-2.24391	-2.31893	-1.39043	-1.95	-6.23639	-1.67921	-1.53996	0.954188	0.903319	-1.04462	-3.86403	-1.74446	-2.49723	0.231225	-1.59083	-0.973714	-2.98229	-2.52087	1.97055	0.923358	3.04343	-10.3393	-6.02675	-9.77876	1.29486	-4.79304	4.37683	0.52411	-0.763556	-0.773319	-0.561106	2.21154
800	0.620197	0.13668	-1.42435	-0.751224	-1.51529	-5.28683	-1.41047	-1.11193	0.689564	0.951105	-0.988615	-3.60814	-1.24656	-2.49569	0.220435	-1.08265	-0.285177	-2.20178	-2.17968	2.68272	1.44439	3.38565	-9.72686	-5.55813	-8.17046	1.20597	-2.55375	6.59042	0.361225	-0.241502	-0.921817	-0.556995	1.45106
802	0.544663	0.40747	-0.307786	-0.633556	-0.659762	-4.43387	-0.645374	-0.438814	1.47984	1.11399	-0.976283	-3.56189	-1.05952	-2.32972	0.786679	-0.0210672	0.375098	-2.09438	-1.66174	3.2613	2.0877	4.4241	-8.90833	-4.80434	-7.19264	1.18387	-0.219407	7.42592	0.891501	0.926955	-1.42435	-0.743003	1.44593
804	-0.0385374	-1.00454	-0.580631	-0.938773	-0.192687	-4.72161	-0.399762	-0.368932	2.0245	1.07391	-1.2851	-3.68059	-1.15458	-2.46126	1.03486	0.121265	0.350434	-2.90316	-1.60008	3.0532	2.05019	4.82695	-8.81738	-4.51865	-7.87809	0.900236	-0.0529247	6.63461	1.40944	0.492766	-1.40122	-0.920789	1.74241
806	-0.489683	-2.68272	-1.69308	-1.63604	-0.612489	-4.96568	-0.86324	-0.714228	1.51427	1.36628	-1.95462	-3.71399	-1.31695	-2.3626	0.513319	-0.279525	0.0426482	-3.43395	-1.87035	2.66011	1.64272	4.2494	-9.18528	-4.8809	-8.25627	0.643319	-1.55948	5.6126	1.37348	-1.48703	-0.743517	-1.0066	2.05996
808	-0.0580631	-3.40055	-1.83079	-1.64067	-1.15715	-4.18825	-1.23782	-0.632529	0.826244	2.20486	-2.13395	-3.02545	-0.712173	-1.82154	0.134624	-0.0349408	0.151581	-2.75312	-1.9279	2.92833	1.59391	3.68573	-9.01109	-5.11058	-7.44133	1.5415	-1.91814	6.04114	1.19158	-1.8611	-0.0580631	-1.17411	1.71569
810	0.689564	-3.83628	-1.02818	-0.776402	-1.14431	-3.56035	-1.35755	-0.23328	0.651027	3.15237	-2.0132	-2.47359	0.27079	-1.63039	-0.00976273	0.502529	0.466047	-1.48087	-1.82565	3.40723	1.7162	3.40517	-8.65244	-4.8028	-6.80572	2.25162	-1.18541	6.40493	1.3596	-0.414663	0.00667976	-1.35241	0.346323
812	0.591422	-3.93904	-0.775888	-0.234822	-0.951619	-3.80031	-1.41304	-0.489683	0.8432	2.70019	-2.2362	-2.69505	0.234308	-1.85956	-0.0452174	0.124862	0.459367	-0.919761	-1.96849	3.57114	1.68435	3.35482	-8.83587	-4.54896	-6.79082	1.98031	-0.956243	5.40604	1.26146	0.683398	-0.503043	-1.30308	-0.86324
814	-0.256403	-2.12008	-1.24039	-0.806718	-0.76407	-4.15383	-1.15201	-1.04411	1.32877	0.980393	-2.47513	-3.0681	-0.902291	-1.83336	0.378181	-0.433161	0.346838	-1.40276	-2.13241	3.48482	1.68743	3.76742	-9.11129	-4.34086	-6.84117	1.8462	-0.216838	4.77711	0.81494	0.337588	-0.837034	-1.16743	-0.798497
816	-0.460908	0.620197	-1.01276	-1.41458	-0.330908	-4.23296	-0.436244	-1.18695	2.21411	0.095573	-2.22387	-2.97252	-1.70284	-1.5194	1.10474	-0.382292	0.492252	-1.71826	-1.88371	3.5141	1.90118	4.569	-9.11386	-3.85529	-6.76667	2.01628	0.602726	5.63007	0.89407	-0.258972	-0.752766	-1.13865	-0.488142
818	-0.438814	1.80047	-0.55494	-1.04616	0.0159289	-4.03821	0.456284	-0.78154	3.51667	1.00352	-1.52249	-2.36672	-0.773833	-1.28201	2.10415	-0.0632014	0.782568	-1.41818	-1.31284	3.72683	2.2326	5.40758	-8.79477	-3.64308	-7.01588	2.6745	-0.120751	6.24667	1.92276	0.14079	-0.36996	-1.25273	-0.648971
820	-1.32261	0.949564	-0.750196	-0.492252	0.365335	-3.13438	1.46854	0.500987	5.68454	3.64873	-0.979366	-1.96541	1.04103	-1.35395	3.50486	0.944939	1.37142	-0.879168	-0.211699	4.10501	2.93142	6.26106	-7.79331	-3.61533	-7.13252	3.63999	-0.841659	5.25651	4.22319	0.867864	-0.13	-1.36217	-0.249209
822	-2.29735	-0.72656	-1.1032	-1.0734	0.440355	-2.68015	1.88371	1.19826	6.95936	5.13062	-1.25632	-2.47205	1.51324	-2.00087	4.04849	1.53431	1.60778	-0.639209	0.320118	4.17695	3.17909	6.60738	-7.31442	-4.00482	-7.03181	3.74276	-0.853991	3.73814	5.65525	1.08624	-0.605295	-1.3483	0.274387
824	-2.18225	-1.4449	-1.22446	-2.32766	-0.0878654	-3.64565	0.823161	-0.00719353	4.61679	2.83225	-2.34668	-3.10664	0.0272333	-2.72023	2.64675	0.443952	0.871975	-1.22292	-0.863753	3.58553	2.173	5.78473	-8.25473	-4.73754	-7.62939	3.05525	-1.51992	3.15185	3.63229	0.438814	-0.784109	-1.36628	0.058577
826	-0.896639	-0.507667	-1.40585	-1.8498	-0.906915	-4.39893	-0.690592	-1.40533	0.880196	0.127944	-2.78909	-3.07067	-1.49166	-2.81221	0.666442	-0.781026	0.0128461	-2.09079	-2.36209	2.94837	1.17	4.4647	-9.19813	-5.37726	-8.03789	2.2845	-2.21257	4.01201	0.549801	-0.365849	-0.381778	-1.47676	-0.583714
828	0.377667	0.261541	-1.49166	0.0472726	-1.40276	-4.24632	-1.08419	-1.39146	0.159802	0.664386	-1.41047	-2.88106	-1.63861	-2.55426	0.125889	-0.596046	-0.200395	-2.51007	-2.59589	2.75723	1.11039	3.94007	-9.14006	-5.92963	-7.70236	1.64272	-1.14071	5.646	0.267193	-0.126403	-0.546719	-1.47522	-1.38992
830	0.611461	-0.765611	-0.993753	0.876599	-0.951105	-4.01252	-0.370474	-0.649999	2.09798	2.38881	-0.0113042	-2.66371	-0.756876	-2.18225	1.11605	0.441383	0.171107	-2.37648	-1.95308	3.01517	1.59288	4.51711	-8.62674	-5.4045	-7.6073	1.91865	0.47992	6.64746	2.00498	0.579604	-0.823161	-1.20031	-1.70079
832	-0.0287747	-2.79474	-1.02715	0.526165	-0.600157	-3.89486	-0.103794	-0.479406	3.22687	2.22695	-0.267193	-2.40217	0.573438	-1.78557	1.70541	0.731185	0.404901	-2.02091	-1.8277	3.23766	1.65095	4.78636	-8.45615	-4.61474	-7.66845	2.60359	0.196798	5.94813	2.5332	0.735295	-0.59245	-1.05798	-1.6268
834	-0.820591	-3.92312	-2.2881	0.331422	-1.14174	-3.8558	-0.723991	-0.944425	2.47616	1.19672	-1.64992	-2.31071	1.14636	-1.87909	1.26403	0.397707	0.091976	-1.76604	-2.4998	2.96584	1.07751	4.17901	-8.8071	-5.01141	-7.48604	2.64316	-0.378695	4.20316	1.48601	0.302648	-0.634584	-1.40688	-2.00138
836	-1.56873	-4.05003	-3.2983	-0.109446	-1.51324	-4.2309	-1.04668	-1.47162	1.70901	0.800552	-2.83893	-2.64162	0.295968	-2.2511	1.16846	0.373557	-0.390513	-2.05996	-2.99359	2.43917	0.649485	3.99094	-9.3718	-5.55659	-7.75015	2.12624	0.213755	2.80347	0.642805	-0.454228	-1.22241	-1.61446	-1.77632
838	-2.05739	-3.4247	-2.89648	-1.16332	-1.17359	-4.86549	-0.771778	-1.8647	1.69102	0.763556	-2.67193	-3.15494	-0.969089	-2.26755	1.48344	0.20245	-0.617627	-2.67964	-2.9494	2.16427	0.681343	4.58031	-9.86611	-5.31047	-8.49109	1.57079	-0.220434	2.89545	0.607351	-1.09703	-1.23577	-1.31593	-0.713714
840	-1.35549	-1.67458	-1.7532	-1.57901	-0.755335	-5.17379	-0.610434	-1.94743	1.69205	0.890987	-1.76913	-3.17909	-1.32261	-2.37134	1.42332	-0.404387	-0.623793	-2.84407	-2.82146	2.25778	0.826244	4.94256	-9.95911	-4.866	-8.81275	1.94897	-1.90478	4.33367	0.800552	-1.08522	-0.439841	-1.24861	-0.655651
842	-0.0601184	-0.473754	-0.809287	-0.708576	-0.611462	-5.01553	-0.760473	-1.67612	1.92276	1.34573	-1.15921	-2.91086	-0.31909	-2.76853	1.38889	-0.608892	-0.506125	-2.55581	-2.69146	2.41347	0.951619	4.70877	-9.71556	-4.62347	-8.59694	3.24331	-2.64675	5.18098	1.21522	-0.0647429	-0.20913	-1.6232	-1.51118
844	0.313952	-0.875058	-0.662845	0.329881	-0.693675	-4.48011	-1.11913	-1.25786	2.12573	1.83233	-1.02458	-2.94221	0.634584	-3.13335	1.17719	-0.111502	-0.285177	-2.40834	-2.51059	2.45612	1.02304	4.09987	-9.28959	-4.53817	-8.1756	3.37948	-2.59897	5.26217	1.57027	1.4562	-0.879682	-1.71877	-1.89553
846	-0.392569	-2.71818	-1.4562	-0.700355	-0.806204	-4.21086	-1.40071	-1.0364	1.8385	1.70438	-1.59391	-4.02074	-0.323715	-3.5249	0.516402	0.118696	-0.346837	-3.02905	-2.51316	2.20691	0.938259	3.79723	-9.11026	-4.81462	-8.37291	1.64889	-3.00747	5.0109	1.37656	1.74909	-1.63861	-1.25529	-1.28972
848	-1.26865	-5.4677	-2.0913	-3.10869	-0.959327	-5.0556	-1.43205	-1.2851	1.15612	1.1068	-2.24442	-5.58485	-1.9613	-3.67853	0.173162	0.027747	-0.77743	-4.08806	-2.68632	1.6417	0.685967	4.17078	-9.6169	-5.51137	-9.28702	0.584228	-3.02802	4.07932	0.730157	0.181383	-1.92585	-0.636639	-0.320632
850	-1.52403	-6.11718	-2.20948	-3.84758	-1.66328	-6.02932	-1.62166	-1.65403	0.386916	0.490711	-2.41707	-5.59718	-2.18687	-3.33067	-0.11664	0.0159288	-1.09087	-4.36142	-2.86822	1.35703	0.492252	4.15177	-10.0953	-6.41058	-9.3903	0.806204	-1.55126	3.71039	0.0066798	-1.58055	-1.35344	-0.365849	-0.500473
852	-1.5081	-4.61833	-2.47051	-3.1683	-1.87652	-5.60181	-1.58055	-1.40739	0.614544	0.672094	-2.32201	-4.48063	-1.98699	-2.58766	-0.325256	0.104822	-0.857074	-3.62047	-2.59075	1.78095	0.747114	3.82857	-9.74125	-6.30576	-8.38319	0.925928	-0.0102767	3.9411	0.277984	-2.28656	-0.462964	-0.354031	-1.36063
854	-1.77016	-4.01047	-2.19201	-2.21	-1.06826	-4.53098	-0.943398	-0.666955	1.49474	1.75782	-1.83027	-4.02897	-1.7013	-1.67664	0.295968	0.507153	-0.275415	-2.76853	-1.90016	2.3996	1.29846	4.17078	-9.2007	-5.15118	-7.66331	1.18284	-0.0169565	3.17035	1.2147	-1.69359	-0.528734	-0.147984	-1.35138
856	-1.78249	-3.24331	-1.24502	-1.07443	-1.05952	-4.41126	-0.797469	-0.390513	1.66482	2.52909	-1.52763	-3.94932	-0.804149	-1.35241	0.82984	0.7132	-0.20913	-2.45201	-1.68383	2.47359	1.2964	4.25402	-9.19813	-4.95695	-8.05433	1.15201	-1.37707	2.303	1.51272	0.0231225	-1.3966	-0.0632015	-1.42178
858	-1.29897	-0.889445	-0.651541	-0.384861	-1.47676	-4.73806	-0.968062	-0.41415	1.49782	2.90059	-1.9911	-3.49407	-0.203478	-1.62217	0.859129	0.629959	-0.397707	-2.25881	-1.75423	2.39189	1.04976	4.01201	-9.11283	-5.41786	-8.24548	0.905888	-2.05533	3.09071	1.65403	1.42023	-1.72442	-0.636639	-2.656
860	-1.00403	0.236363	-0.634584	-0.699841	-0.882765	-4.62142	-0.51743	-0.252806	1.46083	3.32399	-2.29272	-3.43343	-0.136166	-2.00498	1.14174	0.745572	-0.205019	-2.05019	-1.5564	2.58509	1.2666	4.67691	-8.86311	-5.18201	-7.43619	1.27225	-0.976283	4.14663	1.94948	1.48755	-1.34727	-1.42075	-3.78438
862	-1.45826	-0.633042	-1.22601	-2.17197	-0.31498	-4.4873	-0.180869	-0.23328	0.948022	3.38719	-2.44071	-4.3794	-0.546205	-2.66731	1.05798	0.850394	-0.174703	-2.52549	-1.54612	2.55118	1.39506	5.47643	-9.06145	-5.04636	-6.79596	1.55897	-0.16751	3.91335	1.64786	0.438814	-1.09344	-1.67099	-3.79312
864	-1.96233	-1.0698	-1.84004	-3.1909	-0.796955	-4.37991	-0.518457	-0.123834	0.632015	3.10407	-2.74644	-4.64145	-0.829841	-3.16213	0.639209	0.81237	-0.420829	-3.11383	-1.70541	2.30249	1.23731	5.05663	-9.24591	-5.55351	-7.28513	2.0132	-0.827271	3.49612	1.02869	-0.283122	-1.31233	-1.5194	-3.44114
866	-1.30154	-0.655651	-1.79996	-2.6709	-1.19826	-4.27458	-0.680829	0.323715	1.55178	2.97612	-2.0728	-3.49766	-0.242529	-3.01826	0.9249	0.643833	-0.353517	-2.99719	-1.54972	2.36723	1.33288	4.25608	-9.06402	-5.60181	-8.83947	2.81837	-1.79225	4.09525	1.16383	0.556995	-1.30976	-1.52506	-3.11999
868	0.0262055	-0.360197	-1.76039	-1.7162	-0.897667	-4.48782	-0.470671	0.330909	2.57636	2.36158	-1.01482	-2.79628	0.771264	-2.88877	1.3966	0.172648	-0.161858	-2.78241	-1.32929	2.57585	1.49782	4.15023	-9.1118	-4.89632	-9.67651	2.96071	-2.57996	5.50675	1.5785	1.57027	-1.06312	-1.58106	-2.71047
870	0.663872	-0.780512	-2.19921	-0.877627	-0.978338	-4.53355	-0.357628	-0.102766	3.00233	1.45826	-0.956757	-3.15237	0.954702	-3.07067	1.53225	-0.214782	-0.268735	-2.87952	-1.30411	2.48901	1.30359	4.22165	-9.39647	-4.87782	-8.92991	2.26755	-2.83071	6.64335	1.61395	1.55332	-1.21778	-1.19569	-2.47154
872	0.374584	-1.96027	-2.72023	-0.369446	-1.09498	-4.21292	-0.0308298	-0.173676	3.6328	1.39146	-1.76348	-3.65644	-0.440355	-2.92782	1.87189	0.018498	-0.37664	-2.96225	-1.17873	2.35644	1.18182	4.71596	-9.4422	-5.53912	-8.07232	1.58415	-1.15921	6.93469	1.86521	0.371501	-1.5415	-0.537983	-2.40834
874	-0.312924	-3.55418	-2.76288	-0.582687	-0.68494	-4.23553	0.72656	0.166482	4.61371	1.59699	-2.44482	-3.82908	-1.54767	-2.30557	2.67245	0.727074	-0.209644	-3.00592	-0.821105	2.46897	1.43205	5.76213	-9.18014	-5.65319	-8.32718	1.99008	1.23834	6.57295	2.4181	-0.802607	-1.27071	-0.159288	-2.07332
876	-1.21881	-4.55667	-2.63083	-0.681343	-0.827271	-4.54742	0.861184	0.392568	4.36501	1.14636	-2.2213	-3.73916	-1.12324	-1.83387	3.06142	1.13095	-0.124348	-2.99102	-0.762015	2.64007	1.52249	5.75647	-9.01777	-5.47078	-8.96022	3.09636	0.281581	5.32331	2.26446	-0.792845	-0.843714	-0.252292	-1.92944
878	-2.19921	-4.01458	-2.64881	-0.698299	-1.06826	-4.61422	0.306244	0.258972	2.82094	0.55237	-2.23826	-3.76331	-0.894584	-1.99316	2.60513	0.843714	-0.288774	-2.82403	-1.05027	2.73051	1.36063	5.163	-9.27006	-5.20975	-8.65398	3.67699	-3.23047	3.91849	1.48138	-0.812884	-0.902805	-0.515375	-2.49466
880	-2.62466	-2.57328	-2.3066	-1.90581	-0.763042	-4.65584	0.107391	0.093004	2.28604	0.8432	-2.94272	-4.22731	-1.34727	-2.40474	2.01474	0.435217	-0.409525	-2.89134	-1.10371	2.58304	1.41201	5.36956	-9.64362	-4.86446	-7.90275	3.10355	-3.84399	3.71604	1.55075	-1.35498	-0.81905	-0.660276	-2.97458
882	-2.30351	-1.42023	-1.8313	-3.19245	-0.488142	-4.6245	0.358142	0.286719	3.38256	2.4777	-3.0126	-4.71493	-1.24193	-2.49877	1.83438	0.60324	-0.351976	-3.0681	-0.816995	2.38367	1.62012	5.70766	-9.60251	-4.70928	-7.07445	2.11596	-2.15039	4.38865	2.92371	-1.22755	-0.809801	-0.708576	-3.10869
884	-1.50656	-1.9315	-1.53276	-2.87335	-0.186008	-4.31774	0.717311	0.80826	4.50632	4.67331	-2.34102	-4.61833	-0.673121	-2.38727	2.29581	1.40688	-0.174703	-2.97252	-0.426481	2.54142	1.84106	5.83612	-9.17346	-4.73086	-6.67521	2.31533	-1.30616	4.99035	4.36964	-0.184466	-1.28304	-0.771263	-3.10715
886	-0.775888	-3.70474	-1.29537	-2.01731	-0.600157	-4.5094	0.381264	0.597074	4.02794	5.04636	-1.71261	-4.54023	-0.238419	-2.4443	2.46743	1.60419	-0.439327	-2.98845	-0.693675	2.45561	1.59853	5.46256	-9.40212	-5.423	-8.15607	2.75415	-0.833951	4.8362	4.12146	0.457825	-1.5564	-0.99324	-3.31063
888	-0.676204	-4.31825	-1.26095	-1.68794	-1.71106	-5.11675	-0.741461	-0.626362	2.17197	3.07735	-1.43976	-4.63066	0.0565217	-2.63031	1.62936	0.57241	-1.10063	-2.82917	-1.78814	2.06972	0.833951	4.4796	-10.3393	-6.15212	-9.76643	2.14371	-0.651026	3.76897	2.16581	0.128458	-1.33391	-1.22806	-3.99094
890	-0.98656	-3.9226	-1.51529	-1.67561	-1.99932	-5.45331	-1.38118	-1.49114	1.16383	1.35138	-1.42126	-4.19236	0.095059	-2.81735	0.987587	-0.377667	-1.37502	-2.43506	-2.56197	2.12624	0.394624	4.07161	-10.8188	-6.0956	-9.732	1.8313	-0.508695	2.81272	0.811343	-0.4383	-0.994267	-1.38067	-4.17952
892	-0.753793	-3.47608	-1.72545	-1.69822	-1.67561	-5.37572	-1.10577	-1.3	2.18379	1.46186	-0.927983	-3.58296	-0.0308301	-2.87541	1.44233	-0.300593	-1.11707	-2.28502	-2.37956	2.31636	0.526679	4.38454	-10.5464	-5.99232	-9.3754	2.51675	-0.178814	2.86308	1.39865	-0.465019	-0.802607	-1.64735	-3.6549
894	-0.103794	-2.44019	-1.43205	-1.9947	-1.32826	-5.06845	-0.432134	-0.72656	3.67648	2.61592	-0.373043	-3.86557	-0.143873	-3.07067	2.27268	0.22249	-0.692647	-2.41707	-1.77889	2.29529	0.831896	5.0628	-10.1158	-5.84074	-9.29319	3.04703	-0.863754	3.16367	2.7043	-0.0852963	-1.12941	-1.68589	-2.916
896	-0.343754	-1.42332	-1.1551	-2.69865	-0.928496	-5.24983	-0.0477866	-0.65411	4.35576	3.12462	-1.27688	-5.00987	-0.0991698	-3.47762	2.43403	0.424426	-0.597074	-3.08865	-1.5749	2.13703	0.948536	5.78987	-10.2515	-5.60438	-9.47662	2.79011	-1.79174	3.36869	3.3466	0.262569	-1.75063	-1.36834	-1.91865
898	-1.2964	-1.4079	-1.34881	-2.83482	-0.807746	-5.66707	-0.294426	-1.19055	3.97604	2.08308	-2.6262	-5.48106	0.28415	-3.41802	2.12059	0.0960868	-0.80158	-3.64513	-1.99316	2.06612	0.794386	5.70201	-10.8208	-5.66912	-9.63232	2.49569	-1.4228	3.85272	2.6894	0.900236	-1.876	-1.39711	-1.61189
900	-1.67355	-2.12881	-1.55537	-2.55015	-0.791817	-5.53707	-0.689564	-1.53122	2.49363	0.843714	-2.59588	-4.53098	0.224031	-2.79474	1.87652	-0.287746	-0.759446	-3.28391	-2.45561	2.3477	0.656679	5.02837	-10.9739	-5.39833	-9.27212	2.55272	-0.923872	3.68059	1.28201	1.51067	-1.31644	-1.7347	-2.30814
902	-1.25941	-3.10458	-1.55383	-2.24956	-0.863754	-5.35722	-1.10885	-1.66225	0.71577	0.267193	-1.9351	-3.53414	-0.787706	-2.47668	1.40996	-0.494821	-0.696244	-2.83276	-2.83996	2.68015	0.494308	4.51659	-10.8861	-4.88347	-8.78706	2.15707	-1.25273	3.1128	0.00565236	1.61755	-0.926441	-1.60008	-2.9494
904	-0.86735	-3.94007	-1.51889	-1.43462	-1.13146	-5.68967	-1.5379	-1.97261	-0.0354547	0.313439	-2.20486	-3.64822	-1.89759	-2.91498	0.766125	-0.710631	-0.987587	-2.97972	-3.23818	2.45766	0.113557	4.42924	-11.0921	-5.05972	-8.81995	1.05593	-1.40431	3.46324	-0.510236	1.28972	-1.36474	-1.14174	-3.41648
906	-0.803121	-3.90616	-1.69205	-0.645888	-0.989643	-5.82378	-1.6047	-1.73213	0.510236	1.90786	-2.49672	-3.94727	-1.84466	-3.42367	0.320118	-0.326284	-1.0585	-3.16881	-3.13798	2.1432	0.07913	4.62347	-11.0448	-5.35825	-8.99927	0.57909	-1.39814	3.98632	0.55905	0.59245	-1.69205	-1.09292	-3.73248
908	-0.62739	-2.87284	-1.91814	-0.255375	-0.721422	-5.27707	-1.47162	-1.05387	1.36628	3.01106	-1.45518	-3.56806	-0.388458	-3.63229	0.234308	0.317035	-0.694702	-2.86719	-2.7228	2.42529	0.507667	4.53715	-10.4534	-5.10904	-8.42635	1.4079	-1.99676	4.28742	1.67355	0.303675	-1.25016	-1.42178	-3.7109
910	-0.14079	-1.88063	-1.28921	-0.401818	-0.879168	-4.74885	-1.49217	-1.08213	1.33802	1.37759	-0.896639	-3.31577	0.471699	-3.67545	0.458339	0.0405929	-0.476323	-2.23569	-2.84561	2.89751	0.560592	4.32904	-10.1975	-4.8958	-7.43876	2.26909	-2.87901	4.95541	0.925413	0.292885	-1.13763	-1.60624	-3.82703
912	0.268735	-1.38735	-0.264624	-0.99735	-1.2779	-5.33307	-1.96387	-2.21205	0.0508695	-1.57438	-2.16889	-3.66723	-0.175731	-3.52335	0.203478	-1.21676	-0.916165	-2.05739	-3.76691	2.8081	-0.200395	4.01561	-10.9744	-5.25805	-8.10777	2.13344	-3.48482	5.71537	-1.05747	-0.485572	-1.6011	-1.46442	-4.39533
914	0.729129	-0.593991	-0.361739	-0.847825	-1.79585	-6.23691	-2.65087	-3.44679	-1.33083	-3.57885	-2.5296	-3.44268	-0.24664	-3.17652	-0.481462	-2.3662	-1.48652	-2.13189	-4.64146	2.40268	-0.911026	3.60916	-11.9107	-6.01133	-9.79572	1.51889	-2.69351	6.79955	-2.64573	-0.784623	-1.41047	-1.30103	-5.28683
916	1.28099	-0.337074	-1.46802	-0.0832411	-2.00857	-5.54477	-2.39138	-3.1128	-0.643833	-2.45664	-0.625335	-2.79834	0.694702	-2.80193	-0.120237	-1.99265	-1.22703	-1.78968	-4.25043	2.60719	-0.512806	3.85375	-11.4919	-6.42137	-9.42473	1.32518	-1.25221	7.68797	-1.81897	0.370987	-0.852449	-1.42897	-5.78114
918	1.22806	-2.29529	-2.32458	-0.379209	-1.49269	-4.4647	-0.9249	-1.42075	2.35284	1.7162	0.921817	-3.20118	1.22446	-2.70585	1.50964	-0.549287	-0.469129	-1.54921	-2.83482	3.08351	0.539525	4.96311	-10.2967	-5.97126	-8.49006	2.04043	-1.71158	7.0724	1.5785	1.49834	-0.928497	-1.62166	-4.96825
920	0.827271	-4.42256	-2.03683	-0.920789	-0.613517	-4.55359	0.360197	-0.264624	4.92869	4.93588	0.46913	-4.0711	0.882252	-2.6596	2.98537	0.481975	-0.0246642	-1.61087	-1.71261	3.18217	1.25581	5.96355	-9.87433	-4.98932	-8.72643	3.2094	-2.29889	5.78782	4.2309	1.40328	-1.07648	-1.59956	-3.59067
922	0.696758	-4.14304	-0.936204	-0.0719367	0.0292888	-4.9662	0.713714	-0.176759	5.61928	4.8028	-1.18387	-4.08395	0.291343	-2.54502	3.54493	0.769208	0.0940313	-1.64735	-1.45261	3.27209	1.49628	6.31501	-10.1117	-4.41023	-8.70742	4.11632	-1.40893	5.66398	4.34754	0.731185	-0.828813	-1.58518	-3.17497
924	0.457312	-2.69146	-0.251778	-0.0986559	-0.0277471	-5.53398	0.314466	-0.796441	4.75964	2.70893	-2.26343	-3.93391	0.136166	-2.94837	3.04857	0.119209	-0.188063	-1.96284	-1.99881	3.22944	1.17411	6.07967	-10.7335	-4.84134	-8.65295	4.25916	-1.33545	6.67418	2.98177	0.441383	-0.951619	-1.65763	-3.75098
926	0.215296	-0.743516	-0.490711	-1.92328	-0.429051	-5.99386	-0.416205	-1.47213	2.85332	0.920789	-1.79944	-4.06134	0.314466	-3.58193	1.86008	-1.07494	-0.583201	-2.23415	-2.76134	3.03367	0.659248	5.56995	-11.3665	-5.38754	-8.78089	3.65849	-2.57893	7.62374	1.30719	0.406442	-1.34676	-1.7347	-4.6841
928	0.231225	2.11956	-0.878655	-2.14474	-0.347351	-5.35311	-0.375612	-1.12684	2.17968	1.5564	-1.01893	-3.74071	0.657706	-3.71347	1.62012	-1.41407	-0.325256	-1.84312	-2.57173	3.3615	0.946481	5.57201	-11.1312	-5.34798	-7.75426	3.4509	-3.68316	7.61809	1.32774	0.455256	-1.46442	-1.83901	-5.27655
930	0.173676	3.85323	-0.93158	-0.798497	0.0873517	-4.55205	0.581145	-0.244585	3.79928	3.34403	-0.693675	-3.47557	0.934662	-3.75304	2.82711	-0.712687	0.248182	-1.52197	-1.58466	3.76691	1.69154	6.25386	-10.5187	-5.07564	-6.93469	3.94572	-2.99565	6.52157	2.98126	0.344782	-1.71261	-2.00549	-4.80383
932	0.208616	2.49004	-1.25478	-0.846283	0.388972	-4.66663	1.25581	0.125889	4.92304	3.61328	-0.0303163	-3.55573	1.06209	-3.89229	3.75561	0.0657706	0.387944	-1.81589	-1.0102	3.5511	1.88834	7.00817	-10.4149	-4.85624	-8.18176	3.85478	-0.664386	5.39884	3.6328	0.0113045	-1.78095	-2.30351	-4.2715
934	0.502015	-1.39814	-1.6047	-1.41767	0.382806	-4.95541	1.15612	0.0888931	4.11221	2.97304	0.219921	-3.64102	0.417233	-3.52233	3.55367	0.377667	0.115612	-2.03632	-1.17565	3.19707	1.59854	7.36837	-10.6471	-4.77608	-9.52749	3.21454	0.240474	4.79098	3.07683	0.0349407	-1.29743	-2.49466	-4.95387
936	0.717311	-4.04592	-0.824188	-0.584742	0.223004	-4.57363	0.577035	0.226087	2.83584	3.1015	-0.556995	-3.70474	-0.574466	-2.76083	2.7043	0.484031	-0.017984	-1.49474	-1.52608	3.40003	1.38427	6.86635	-10.4575	-4.50221	-9.23512	3.12976	-1.28767	4.55616	2.81118	0.54826	-0.961896	-2.34154	-6.36588
938	0.240988	-3.1611	0.392569	0.13	0.264624	-4.3275	-0.109447	0.516402	2.06355	3.85632	-1.49937	-3.74636	-0.338102	-2.41913	1.6864	0.595533	0.124861	-0.765097	-1.71466	3.86351	1.30565	5.84331	-10.1092	-3.99711	-8.53682	2.94375	-3.03778	4.82027	2.74181	1.05336	-1.20186	-1.9834	-7.20959
940	-0.934149	-1.78917	0.344782	-0.315493	0.122806	-4.85881	-0.3566	0.618141	1.75628	3.77462	-1.87755	-3.90719	-0.0693674	-2.60359	1.15356	0.640236	0.210158	-0.874544	-1.78043	3.94521	1.29178	5.50212	-10.2505	-4.34497	-8.51781	1.93047	-3.16418	5.07975	2.08822	1.14122	-1.65095	-1.59237	-6.37718
942	-1.91763	-2.53011	-0.955216	-1.48241	-0.518972	-5.39011	-0.390513	0.213755	1.27174	2.40834	-1.86213	-4.44157	-0.537469	-2.7264	1.09806	0.19166	-0.0169567	-1.70695	-2.04454	3.50999	1.09909	5.67015	-10.827	-5.51805	-9.14674	1.54612	-2.20948	4.3496	0.781026	0.570869	-1.7162	-1.19723	-4.47395
944	-1.97877	-4.24375	-2.0764	-2.93501	-0.982963	-5.46102	-0.539011	-0.317549	1.10474	1.35601	-2.11083	-5.00885	-0.0267193	-2.91343	1.40636	-0.500473	-0.399763	-2.32458	-2.38778	2.9232	0.700868	5.48928	-11.3254	-5.99643	-9.60765	2.54604	-1.57233	3.30035	0.155691	-0.274387	-1.52095	-0.873003	-3.11588
946	-1.33905	-5.34232	-2.31944	-2.81837	-1.32106	-5.2375	-0.515375	-0.141304	2.33948	2.15553	-2.11185	-4.87268	0.780513	-3.18988	1.88782	-0.291857	-0.447035	-2.5183	-2.24699	2.86513	0.621738	5.20256	-11.1836	-5.93323	-9.4237	2.99411	-1.82668	3.01723	1.43359	-0.141818	-1.29948	-0.790789	-2.90573
948	-1.09858	-6.10845	-2.21925	-1.38221	-1.52557	-5.19948	-0.31498	0.358142	3.93956	3.44268	-1.91557	-4.72315	0.451659	-3.02185	1.91814	0.553912	-0.305731	-3.04292	-1.8611	2.94272	0.768694	5.31458	-10.9118	-6.26363	-9.56963	2.30968	-2.35387	3.04857	2.98434	0.923872	-0.951619	-0.839603	-2.86924
950	-1.14071	-5.94608	-1.92276	-0.937232	-1.08008	-4.99703	-0.139249	0.498418	4.15537	2.90316	-2.2398	-4.78327	-0.070909	-2.83585	1.57541	0.982963	-0.19577	-3.52438	-1.72545	2.89442	0.843714	5.68608	-10.8254	-6.37307	-9.44631	2.02759	-1.69411	3.99968	2.68272	1.35498	-0.953161	-0.930038	-2.4628
952	-0.847311	-4.45288	-1.52249	-1.26968	-0.625849	-4.83209	-0.217865	0.0195256	2.99102	0.715769	-2.68067	-4.67948	-0.183439	-2.97509	1.22395	0.366877	-0.240474	-3.40055	-2.13292	2.96584	0.789248	5.72513	-10.9827	-6.16754	-8.83639	2.17762	-1.05644	5.57509	0.988101	0.217865	-1.4932	-1.02047	-2.40731
954	-0.611461	-3.0609	-1.64324	-1.95976	-1.50142	-5.71434	-1.16794	-1.08778	1.29332	-1.33751	-2.71047	-5.0741	-0.392568	-3.15391	0.636126	-1.15612	-0.86324	-3.343	-3.14106	2.5481	0.218379	4.56284	-11.8644	-6.556	-9.37951	1.88731	-2.75826	5.82122	-0.709604	-1.4151	-2.01782	-0.876086	-2.70841
956	-0.10328	-1.40893	-2.11699	-3.0347	-2.46434	-6.07299	-1.9798	-1.56514	0.410039	-1.71517	-2.18739	-5.19588	-1.04308	-3.35071	0.387944	-1.98442	-1.23371	-3.26284	-3.54442	2.26446	-0.120237	3.59529	-12.1578	-6.82062	-9.80137	1.45209	-4.11529	5.65319	-1.26763	-1.66842	-2.0651	-0.779485	-3.2094
958	0.83652	0.58988	-2.44276	-2.85948	-1.4264	-5.06537	-0.73324	-0.657192	1.60933	0.0318576	-1.48909	-3.88047	-1.4115	-3.02083	1.69	-1.13506	-0.476323	-2.65857	-2.45561	2.97612	0.754821	5.31766	-11.179	-6.18295	-9.06299	2.10826	-2.33434	6.09971	0.0955727	-0.662331	-1.38941	-1.05541	-3.89074
960	1.21727	0.882252	-2.72075	-1.01482	-0.381264	-4.76375	0.598616	0.182411	3.3543	2.13395	-1.33802	-2.59845	-0.712686	-2.37083	2.84612	0.10996	0.102767	-2.35387	-1.52711	3.38513	1.43154	6.89359	-10.6682	-5.89418	-9.12414	3.10098	-0.712687	6.33916	1.9464	-0.0878654	-0.762528	-1.32158	-4.22987
962	0.599129	-0.391027	-2.49415	0.120237	-0.974228	-5.52165	-0.0107905	0.0344269	3.826	2.7783	-1.43154	-2.93142	0.330395	-2.68118	2.11597	0.432134	-0.340157	-2.87747	-1.83387	2.91446	1.0251	5.73643	-11.1229	-6.33556	-10.364	2.85383	-1.44798	6.41418	2.50956	-0.118182	-1.25427	-1.34213	-3.72735
964	-0.404387	-1.40944	-1.42075	-0.758931	-1.32055	-6.05655	-0.619169	-0.385375	3.30446	2.34154	-1.71826	-4.08549	0.209644	-3.53826	1.38992	0.134624	-0.821619	-3.40569	-2.23106	2.4926	0.522054	4.94256	-11.5705	-6.65517	-11.33	2.54193	-2.20332	6.40544	2.12573	-0.333991	-1.94126	-1.35498	-2.8081
966	-1.09344	-2.25521	-0.772291	-2.18122	-1.05541	-5.92398	-0.368932	-0.461422	2.49106	2.2732	-2.07075	-4.96466	-0.384861	-3.46735	1.53687	-0.136166	-0.725533	-3.35482	-2.18122	2.49106	0.456798	5.48671	-11.6825	-6.75485	-11.0993	2.8194	-2.32972	5.73541	1.81486	-0.553912	-1.64838	-1.38478	-2.27166
968	-1.44644	-3.40003	-1.42743	-2.47308	-1.38941	-5.56224	-0.356086	-0.224031	2.09901	2.74233	-1.87241	-5.19383	0.0333992	-2.83379	1.53225	-0.0914624	-0.460908	-3.25205	-2.07332	2.68837	0.688023	5.48877	-11.5628	-7.01177	-10.3954	2.7413	-2.79731	4.59315	1.84466	-0.0477865	-0.734781	-1.35652	-2.14731
970	-1.75936	-4.38351	-2.45972	-1.83593	-1.74806	-5.51189	-0.492766	-0.210158	2.39241	2.60719	-2.17814	-5.12549	0.0082214	-2.67245	1.46442	0.115613	-0.467074	-3.42573	-2.08359	2.75877	0.797469	5.13885	-11.5895	-6.95319	-10.2823	2.32355	-2.29581	3.88304	1.84877	0.20913	-0.423399	-1.11039	-2.40731
972	-1.58415	-4.29873	-2.12419	-1.07956	-1.00814	-5.50264	-0.0220949	-0.435731	2.8045	2.01988	-2.6113	-4.9328	-0.988101	-2.87592	1.87909	0.132569	-0.388971	-3.13335	-2.03375	2.98075	0.906402	5.58434	-11.7293	-5.6609	-10.2016	2.41039	-0.625849	4.37991	1.83644	-0.196284	-0.840631	-0.876599	-3.36098
974	-0.22917	-2.21976	-0.511778	0.0775888	0.298537	-4.90968	1.04257	-0.110474	3.43241	2.70122	-1.77632	-3.85323	-0.434189	-2.56865	2.92371	0.379723	0.156205	-1.94023	-1.42897	3.8147	1.50142	6.7528	-11.216	-4.12814	-9.32453	3.39233	-0.204506	6.40442	2.62004	0.0184979	-0.807232	-1.04719	-5.20256
976	1.62525	0.626876	0.693675	1.80355	0.946481	-3.95189	2.25932	0.948536	5.34541	4.98829	-0.625335	-2.2917	1.5862	-1.81743	4.35679	1.17	0.904347	-0.430592	-0.255375	4.80383	2.44739	7.90224	-10.0449	-4.07367	-8.02967	4.44106	-0.956243	8.97615	4.66663	0.793872	-0.0775889	-1.38427	-7.36734
978	1.93355	1.14842	0.605295	2.18071	0.806204	-3.48944	2.84355	1.49628	7.24608	5.71588	-0.565216	-2.06766	2.10672	-1.89142	5.10082	1.45569	1.31079	0.354031	0.379723	5.16197	2.94735	8.34054	-9.38927	-4.8809	-7.2394	4.50837	-2.36928	9.39184	5.86541	1.37039	0.177786	-1.57027	-8.08876
980	0.296482	-0.978852	-0.557509	-0.0770749	0.572924	-3.78387	2.2064	0.680829	6.5077	3.55059	-1.58826	-3.78901	0.692133	-2.70841	4.30181	0.788734	0.983477	-0.203478	-0.306245	4.74936	2.49106	7.97777	-9.86611	-5.25292	-7.22501	3.94932	-3.40158	7.40485	4.61576	0.895097	-0.652568	-1.65711	-7.01279
982	-0.833951	-2.17917	-1.36525	-1.61138	0.299565	-4.53047	0.804149	-0.598102	3.9596	1.47521	-2.04608	-5.01347	-0.391541	-2.93553	2.67193	0.0960868	0.283636	-1.08316	-1.57952	4.26019	1.48549	7.07291	-10.8681	-5.126	-7.42386	3.43806	-1.66276	6.49125	2.56968	0.0935176	-1.40533	-1.97877	-6.58631
984	-0.444979	-2.01679	-1.54612	-0.540552	-0.20913	-5.23904	-0.354545	-1.14688	2.44893	1.44901	-1.58055	-4.40817	-0.269762	-2.88877	1.47521	-0.0488142	-0.158261	-1.60881	-2.35027	4.00841	0.816481	5.9579	-11.5207	-4.79406	-8.12473	2.67707	0.313952	7.07343	1.82308	0.189091	-1.28099	-2.45201	-7.11453
986	0.454742	-2.37031	-1.88988	0.444979	-1.07648	-5.52473	-0.848852	-1.11039	2.41039	2.5779	-1.11348	-4.00482	0.00462447	-3.33786	1.07288	-0.0786163	-0.419288	-2.33023	-2.57379	3.53414	0.617114	5.15169	-11.7175	-5.43892	-9.36615	1.96182	-0.515889	6.94189	2.38059	0.405414	-1.04565	-2.47719	-6.54315
988	1.62166	-1.81743	-1.89193	-0.0174705	-1.94332	-5.44817	-0.820592	-1.07186	2.94426	3.47762	-0.763556	-4.43489	0.127944	-3.69806	1.2815	-0.275415	-0.622252	-2.85383	-2.6077	3.02083	0.599643	4.92406	-11.7493	-6.99892	-9.80959	2.31482	-2.49517	6.30011	3.02442	0.279011	-1.09446	-2.10826	-5.23596
990	2.37596	-0.234308	-1.57798	-1.86213	-1.54355	-5.18972	-0.24664	-0.814426	3.87173	3.96628	-1.18952	-4.93537	0.392569	-3.60043	2.02861	-0.23585	-0.518971	-2.87695	-2.26652	2.88003	0.863754	5.65165	-11.4569	-7.22398	-9.44528	3.23972	-3.66671	6.4594	3.5881	0.0441897	-1.3334	-2.00241	-4.67537
992	1.90324	0.295968	-1.16846	-3.3096	-0.512805	-4.67794	0.506126	-0.348379	4.68975	4.31003	-2.33434	-5.23545	0.351462	-3.2166	2.83071	0.36996	-0.231738	-2.7783	-1.6602	3.13901	1.23577	6.77438	-11.0037	-6.45374	-8.64267	3.52387	-3.37948	7.17568	4.14715	0.149012	-1.82925	-2.14834	-4.67485
994	0.254347	-0.532331	-0.564703	-2.63751	-0.357114	-4.61422	0.597588	-0.229169	4.63991	4.5058	-2.79885	-4.90762	0.262569	-3.13335	2.89596	0.847825	-0.232766	-2.57944	-1.53585	3.46478	1.18798	6.89667	-11.1055	-6.24872	-8.50291	3.27055	-2.40423	6.99276	4.18414	0.856046	-1.93972	-2.15091	-4.81976
996	-1.66328	-1.61857	-0.580631	-1.14174	-0.811856	-5.51805	-0.259999	-0.727074	3.29007	3.89897	-2.62158	-4.23398	0.601185	-3.73505	2.01166	0.10996	-0.661303	-2.46845	-2.26189	3.45604	0.711144	5.89007	-11.8207	-6.30216	-10.0614	2.88106	-1.57901	5.91114	3.21094	1.23628	-1.6196	-2.0728	-5.19537
998	-2.87387	-3.19142	-1.14585	0.321659	-1.00814	-6.09509	-0.87403	-0.932607	2.10209	3.49098	-2.52035	-3.84193	0.909485	-3.91233	1.3781	-0.60324	-0.725019	-2.4443	-2.5964	3.48584	0.637667	5.12703	-12.1326	-5.9728	-11.2869	2.65395	-0.38743	4.37786	2.50956	0.532845	-1.53379	-1.98853	-5.14964
1000	-3.10047	-5.64137	-1.06672	1.13146	-0.407983	-5.38189	0.108933	0.00462463	3.34711	4.64351	-2.00189	-3.60711	1.10012	-3.19399	2.44019	0.16751	0.164427	-2.19253	-1.55897	4.07778	1.46956	5.97999	-11.2653	-5.089	-10.7103	3.36458	0.47992	2.85126	3.61122	0.0097628	-1.22909	-1.97672	-4.83671

## Sheet: 12
	FP1	FP2	F3	F4	C3	C4	P3	P4	O1	O2	F7	F8	T3	T4	T5	T6	CZ	FZ	PZ	FCZ	CPZ	CP3	CP4	FC3	FC4	TP7	TP8	FPZ	OZ	FT7	FT8	A1	BP1
-200	-0.65956	-0.22767	0.0263824	0.853519	0.402087	1.17206	-1.18183	0.0713301	-2.3324	0.842771	-0.915566	0.6322	-2.40373	-0.516411	-1.62349	-0.248678	-0.251121	0.525693	-0.133378	0.224739	-0.26529	-0.495403	0.740661	0.302909	1.18232	-2.07981	0.991782	-0.205685	-0.775349	-1.8541	0.347857	1.57806	1.24535
-198	0.000977125	0.0229624	-0.300466	0.272129	0.370331	-0.256495	-0.704507	-0.505174	-0.595069	1.59662	-1.03184	0.919475	-1.07972	0.569175	-0.896513	-0.756784	-0.744081	0.152432	-0.236953	-0.283855	-0.588229	-0.214968	-0.0698645	0.0664445	-0.24135	-2.10033	0.259915	-0.0835442	0.613635	-1.7598	-0.0376193	1.06751	0.252587
-196	0.124095	0.240373	-1.05578	0.0947812	-0.796846	-1.14666	-0.923872	-0.926315	0.499311	1.88683	-0.887718	0.704507	-0.302909	1.3372	-0.831534	-0.948789	-1.33915	-0.355674	-0.576504	-0.907749	-1.00937	-0.890161	-0.661514	-1.25756	-0.935109	-1.70118	0.115301	-0.169043	1.35674	-1.27759	0.375216	0.324894	-0.361536
-194	-0.379613	-0.00244281	-1.20186	0.256007	-1.30055	-0.53351	-1.48865	-0.854985	-0.166111	1.60933	-0.800266	-0.0537419	-0.351277	0.560381	-1.42318	-0.689362	-1.40559	-0.468532	-0.694736	-0.990317	-1.09438	-1.41048	-0.422607	-1.61763	-0.363979	-1.20773	0.15634	-0.382056	0.841305	-1.56242	0.904818	0.0346879	0.231579
-192	-0.980057	-0.596046	-0.806617	0.145103	-0.682522	0.0767043	-1.75492	-0.833488	-1.27173	1.08852	-0.811991	-0.441661	-1.12956	0.138263	-1.77153	-0.683499	-1.21017	-0.449966	-0.749455	-0.797334	-1.05872	-1.16327	-0.162691	-0.735287	0.0967354	-0.807594	-0.250633	-0.663957	0.123606	-1.78423	0.675194	0.107972	1.19307
-190	-0.80222	-0.325383	-0.441172	-0.0278481	-0.143637	-0.264801	-1.80622	-1.42953	-2.20684	-0.359094	-0.441172	0.302909	-1.61421	0.266755	-1.6533	-1.16327	-1.24486	-0.507617	-1.1833	-0.896513	-1.26342	-0.832999	-0.631712	-0.200311	-0.136798	-0.389384	-0.779746	-0.409416	-1.05774	-0.856939	0.470486	0.161714	0.361536
-188	-0.0346879	0.813457	-0.137286	0.331245	-0.150966	-0.174417	-2.02753	-2.16678	-3.09407	-3.1825	0.26529	1.51552	-1.44028	0.889673	-1.67968	-1.53213	-1.22141	-0.324406	-1.66209	-0.949277	-1.44566	-0.783655	-0.993248	-0.282878	0.0918498	-0.460226	-0.470974	0.457295	-2.9304	0.490517	1.41488	-0.0439706	-1.61079
-186	0.0278481	1.13444	-0.0517876	0.490028	-0.185165	0.15976	-2.21417	-2.51365	-3.29047	-5.36393	0.671774	1.57561	-1.3582	1.67235	-1.88194	-1.73244	-1.13151	-0.155363	-1.90881	-0.86329	-1.44908	-0.818342	-1.01474	-0.234022	0.393293	-0.926315	-0.140217	0.701087	-4.00279	0.375705	1.63033	-0.172951	-1.91028
-184	-0.899932	0.38743	-0.426027	-0.272618	-0.379125	-0.506639	-2.37637	-2.63775	-3.29682	-5.32289	0.0586275	0.502242	-1.09487	1.43344	-2.136	-1.97575	-1.30593	-0.427004	-2.21563	-1.06995	-1.58001	-1.15203	-1.45347	-0.235976	-0.286786	-1.19747	-0.673239	-0.00439706	-4.01843	-0.933155	-0.144615	0.0669331	-0.561359
-182	-1.94008	-0.569175	-1.0465	-1.14226	-1.18965	-1.24535	-2.85418	-2.40617	-3.6779	-3.63393	-1.09438	-0.249167	-0.608749	0.0903841	-2.6441	-1.80182	-1.49744	-0.981034	-2.51512	-1.39778	-1.82625	-1.95425	-1.86289	-0.825671	-1.04552	-1.38117	-1.01572	-0.88723	-3.58556	-0.929735	-0.95172	0.447523	0.855473
-180	-1.58783	-0.544747	-0.90091	-1.00937	-1.52871	-0.981034	-3.15416	-1.79254	-4.11125	-1.91565	-1.25121	0.0415278	-0.130446	-1.12956	-2.96704	-1.26049	-1.1149	-0.939506	-2.3368	-1.12125	-1.65378	-2.31823	-1.53213	-1.03184	-0.856939	-1.02158	-0.634643	-0.836908	-3.06622	0.161714	-0.08159	0.605329	0.947812
-178	-0.115789	0.45534	-0.0395736	-0.144126	-0.933643	-0.524716	-2.77406	-1.45983	-4.35163	-0.945857	-0.104064	0.568687	0.256984	-0.584809	-2.70957	-1.05481	-0.444592	-0.261381	-1.79938	-0.462669	-1.12321	-1.77935	-1.10171	-0.437264	-0.259427	-0.502731	-0.307306	0.023451	-2.55811	0.548656	0.371796	0.338574	-0.246236
-176	0.65272	0.729424	0.138263	0.307306	-0.64588	-0.487097	-2.02412	-1.40755	-3.40724	-0.399644	1.11392	0.477814	0.0146569	1.02891	-1.80768	-1.17646	-0.0771929	0.0410393	-1.31668	-0.147057	-0.705973	-1.05578	-1.01914	-0.363491	-0.0127026	-0.555007	-0.438241	0.38401	-1.42514	0.31952	0.424561	0.147057	-0.804663
-174	0.504197	0.0933155	0.100644	0.456318	-0.361048	-0.0669331	-0.983477	-0.990317	-0.764112	-0.0219853	1.20822	0.576993	0.299489	1.83211	-0.279458	-1.10708	0.347857	0.199822	-0.778769	0.192005	-0.148034	-0.232556	-0.618032	-0.393782	0.370819	0.023451	-0.667865	0.22425	0.450943	-0.0771929	1.3201	0.286298	-0.0708416
-172	0.101132	-0.661514	0.362025	0.370331	0.105041	0.355185	-0.367888	-0.790983	1.37335	-0.342482	0.311214	0.877947	1.40999	0.17344	0.396713	-1.29616	0.77486	0.357628	-0.449966	0.497845	0.242816	0.24135	-0.238907	0.0708416	0.553541	0.656628	-1.01132	-0.0869642	1.35136	-0.218388	1.60102	0.271152	1.06946
-170	0.110904	-0.991294	0.491005	-0.315123	-0.195914	-0.171974	-0.900421	-1.34257	0.326848	-1.80817	-0.00635131	0.268709	1.52285	-3.13608	-0.651254	-2.01386	0.597512	0.0991782	-0.82274	0.340528	-0.0552076	-0.264312	-0.626337	0.214479	-0.230602	-0.297535	-1.50722	-0.315123	-0.260404	0.422118	-0.357628	0.0454363	1.4696
-168	0.7817	-0.371796	0.678614	-0.440684	-0.415767	-0.340528	-1.19698	-1.49989	-2.54737	-3.2978	0.424072	-0.464623	0.93462	-3.77268	-1.50331	-2.06515	0.520319	0.134843	-1.06311	0.393293	-0.147057	-0.506639	-0.817854	0.339062	-0.555496	-1.14128	-1.69434	0.0556961	-2.90157	1.05823	-2.17508	-0.16318	0.631712
-166	1.21554	0.285321	1.04455	0.276038	0.329291	0.116766	-0.540839	-1.00888	-4.39169	-3.68621	0.695225	-0.29558	0.586275	-0.586764	-1.05481	-1.28736	0.929735	0.631712	-0.766555	0.858893	0.272618	0.177837	-0.465112	0.986897	0.0527648	-0.299977	-1.34062	0.477814	-4.34137	0.890161	-1.67724	-0.171974	0.107484
-164	1.05041	0.1837	1.495	0.599955	1.55558	-0.00439706	0.332711	-0.602398	-3.83326	-2.76966	1.06018	0.0918498	0.807106	1.55705	-0.181257	-0.670308	1.29371	0.958071	-0.32636	1.21945	0.673239	1.1916	-0.306817	2.00115	0.278969	1.57366	-0.831534	0.485631	-3.59924	0.814434	-0.0811014	-0.114812	0.735287
-162	1.01035	0.191028	1.89269	0.638063	2.39738	0.0107484	1.17597	-0.0556961	-1.53946	-1.19258	1.7857	0.465112	1.83504	-0.0229625	0.459737	-0.153897	1.55949	1.19893	0.340528	1.4906	1.1706	2.06613	0.00488563	2.64752	0.351765	3.00368	-0.298023	0.627314	-1.54532	1.33426	0.817365	-0.218876	1.20822
-160	1.36895	0.898955	1.63717	0.756295	1.87364	0.271152	1.59516	0.457783	-0.0591161	-0.0644902	2.37979	0.94488	2.2938	-1.91223	0.584321	0.385965	1.5248	1.26782	0.835931	1.48474	1.44957	2.03437	0.420164	1.83211	0.38059	2.68367	0.449478	1.19405	-0.175394	1.77251	0.801243	-0.277504	0.536442
-158	1.72805	1.4867	1.17157	0.582855	0.959048	0.0395736	1.84188	0.743592	0.58139	0.970285	2.499	0.810037	1.37921	-1.06653	0.886253	0.801731	1.27222	1.06262	1.03478	1.19454	1.39778	1.63424	0.448012	0.787074	-0.0405507	1.84432	1.05725	1.70313	0.777303	2.48092	0.388407	-0.32294	-0.759226
-156	1.90197	1.39436	1.44761	0.342482	1.3455	0.00586275	2.67488	1.47253	1.96451	2.75207	2.04854	0.1666	0.467554	1.59955	1.92885	1.61763	1.4437	1.03722	1.55607	1.24925	1.70118	2.18729	0.745547	1.10122	-0.312192	1.81941	1.65916	1.79742	2.39982	2.60062	0.32294	-0.517388	-1.65378
-154	1.80573	0.916055	1.77935	0.150966	2.13258	0.30242	3.39014	2.33973	3.28852	4.59933	1.29518	-0.308283	0.703042	2.64703	2.53466	2.57766	1.74368	1.0553	2.16433	1.41439	2.15114	2.86884	1.28981	1.72609	-0.23451	1.51112	2.09007	1.47448	3.88114	1.47155	0.587252	-0.648323	-1.71046
-152	1.48963	0.434821	1.8453	-0.23109	2.14772	0.299977	3.29096	2.47262	3.59436	5.1045	1.18721	-0.633177	1.94936	1.17011	2.3451	2.71201	1.63131	0.878924	2.26253	1.25512	2.07004	2.69247	1.2986	1.97721	-0.278969	0.772418	1.83162	0.963934	4.0624	1.50282	0.348834	-0.614123	-0.869642
-150	1.10708	0.367399	1.49012	-0.586275	1.36016	-0.0454363	2.65876	1.93764	2.85174	3.15563	1.4437	-0.846679	2.99	0.0425049	2.093	2.18681	1.05188	0.529602	1.66844	0.784632	1.45005	1.91321	0.851565	1.58929	-0.526182	0.719653	1.27808	0.692782	2.59524	1.9352	-0.48612	-0.592627	-0.238419
-148	0.879413	0.586764	0.572595	-0.558427	0.169043	-0.23793	1.94643	1.41097	1.66942	0.0527647	1.32889	-0.981034	2.58987	-0.08159	1.96109	1.76811	0.418698	0.177348	0.904329	0.298023	0.82274	0.914101	0.535465	0.4656	-0.507617	1.41439	0.779746	0.77144	0.665911	0.875016	-1.37042	-0.654185	-0.432378
-146	0.861336	0.339062	0.0322451	-0.402576	-0.50322	-0.249656	1.81696	1.09829	1.3626	-1.91468	1.04064	-1.17988	1.81843	-0.654674	2.29966	1.26	0.0791472	-0.0122141	0.668842	-0.0161226	0.525205	0.453386	0.371796	-0.382545	-0.381567	2.54834	0.329291	0.736753	-0.220342	0.271641	-1.90539	-0.9483	-0.675193
-144	0.68985	-0.541816	0.0845213	-0.463646	-0.349322	-0.172951	2.48141	1.08363	2.2083	-2.11743	0.545725	-1.4183	1.73684	-1.12174	3.31832	0.731867	-0.0449478	-0.154874	0.981034	-0.218388	0.496868	0.896513	0.379613	-0.548656	-0.332223	3.42287	0.129469	0.306329	-0.00341997	0.835442	-1.72414	-1.2004	-0.358116
-142	0.363002	-1.23997	0.191517	-0.48954	0.548167	0.163668	3.631	1.79547	4.18796	-0.32978	-0.218876	-1.64939	1.40266	-0.572107	4.58711	1.17011	0.145103	-0.185654	1.7046	-0.122141	0.898467	1.85703	0.815411	-0.0410393	-0.0718187	3.12289	0.440684	-0.133866	1.46031	0.513968	-0.757761	-0.988362	0.506639
-140	0.138263	-1.31814	0.166111	-0.543282	1.50135	0.209593	4.49282	2.57815	6.64934	1.837	-0.832999	-1.92201	0.365933	0.164157	5.15873	1.88145	0.355674	-0.174417	2.3837	0.0552076	1.3885	2.53466	1.10562	0.829579	-0.0752387	2.27768	0.590672	-0.337597	3.41554	-0.619497	-0.0889184	-0.739195	1.27955
-138	0.561359	-0.717699	0.475371	-0.39427	1.68896	0.226693	4.5153	2.82047	7.96064	2.52196	-0.643926	-1.65085	-0.339063	0.545236	4.66675	1.82674	0.4656	-0.0102598	2.6656	0.167088	1.63668	2.58792	1.29665	1.31423	-0.177348	1.95132	0.378636	-0.0991782	4.46742	-0.370331	-0.0478791	-0.831045	0.981522
-136	1.42221	0.382056	1.05627	0.233044	1.61079	0.755806	4.27248	2.98316	7.9069	2.33044	-0.111392	-0.423584	-0.403553	0.275549	3.90997	1.49696	0.813457	0.422607	2.85076	0.436286	1.91175	2.61723	1.79351	1.29225	0.331245	1.68261	0.341505	0.466089	4.7161	0.391827	0.0869642	-0.919475	-0.547679
-134	1.56096	1.07142	1.23313	0.704019	1.79058	1.03673	4.16304	2.90988	6.66009	1.83211	0.128981	0.548167	0.361536	-0.747989	3.54599	1.18721	1.10171	0.702553	2.96118	0.672751	2.13697	2.79458	1.92787	1.10708	0.832022	1.77495	0.354696	0.745547	4.07217	0.658582	0.1837	-0.645391	-1.70118
-132	0.830557	0.907261	0.563801	0.729913	1.42269	0.940972	3.63881	2.6099	4.32134	1.35918	-0.0757272	0.424072	1.4696	-0.796846	2.9944	1.01084	0.929246	0.406484	2.73839	0.504685	1.95132	2.435	1.61519	0.494914	0.914101	2.07151	0.547679	0.461692	2.53075	0.972728	0.215945	-0.381567	-1.66502
-130	-0.031268	0.281412	-0.615589	0.707439	0.527648	1.25707	2.98512	2.95483	2.58499	2.37539	-0.426515	0.137775	1.39924	0.56087	2.2083	1.71046	0.763135	-0.10211	2.69784	0.219853	1.76567	1.66942	1.86729	-0.501265	1.04699	1.31277	1.27368	-0.112858	1.87266	1.16278	0.592138	-0.375216	-1.00986
-128	-0.610703	-0.452898	-1.03087	0.53693	0.510548	1.72609	3.11312	4.05458	2.19951	5.07714	-0.350788	0.229136	1.12809	1.66551	2.19511	3.38525	1.10953	-0.277504	3.2548	0.227182	2.19414	1.62447	2.68856	-0.562824	1.0382	0.596046	2.25081	-0.715256	2.69589	0.789517	0.719164	-0.0556961	0.248678
-126	-1.01328	-0.88039	-0.732844	0.164157	1.01914	1.86094	3.23624	4.79329	1.66307	6.65862	-0.722584	0.252098	1.05774	1.8199	2.25814	4.60617	1.39973	-0.381079	3.71845	0.216433	2.58938	1.88585	3.18787	0.0928269	0.797823	0.457783	2.74084	-1.14324	2.9006	-0.904329	0.298023	0.339062	1.15838
-124	-0.891627	-0.563313	-0.634643	0.0298024	0.588718	1.95914	2.59769	4.52116	0.565267	5.2584	-1.23167	0.321963	0.629757	0.726004	1.73049	4.23828	1.21408	-0.579924	3.46391	0.0302909	2.33777	1.38898	3.17615	-0.0576504	0.822251	0.207151	2.40959	-0.87697	1.62643	-1.72414	0.327337	0.0459249	0.0747501
-122	-0.0840328	0.338574	-0.515922	0.21399	0.153897	2.40324	2.30357	4.07754	0.465112	3.21083	-0.662002	0.500288	0.662491	-0.945857	1.7344	3.25725	1.15105	-0.464135	3.22109	0.117255	2.1399	1.06409	3.24748	-0.428958	1.33231	0.431401	1.83797	0.0429935	0.879901	0.181745	-0.230113	-0.532045	-2.19951
-120	-0.243304	0.527648	-0.711836	0.144615	0.385476	2.30553	2.5073	3.64419	1.431	1.98796	-0.507128	0.0884298	0.661025	-0.703042	2.05734	2.56105	1.0851	-0.459737	3.17321	0.114324	2.02167	1.28785	3.07208	-0.504685	1.46569	0.722584	1.39436	0.113835	1.21506	1.324	-1.44077	-0.555007	-2.7721
-118	-1.7515	-0.4827	-1.55265	-0.606795	0.343948	0.687408	2.18974	2.435	2.1956	0.339062	-1.56145	-0.752387	-0.41821	0.936575	1.83064	1.51699	0.347857	-1.16034	2.43597	-0.600932	1.22483	1.08705	1.72805	-0.88723	0.294603	0.0429935	0.553053	-1.03038	1.21701	-0.202265	-0.78854	-0.175394	-1.0934
-116	-2.6954	-1.35674	-2.07395	-1.12858	-0.171974	-0.822251	1.44761	1.24632	2.65778	-0.555984	-2.499	-1.02745	-1.4266	1.05236	1.2859	0.510548	-0.492471	-1.84872	1.47009	-1.324	0.267244	0.388407	0.242327	-1.27026	-0.701087	-0.961491	-0.516899	-1.89269	1.14568	-1.49354	0.504197	-0.0283366	0.642948
-114	-2.45014	-1.44663	-1.99871	-1.12663	-0.672262	-0.97908	0.765089	1.09633	2.95678	0.639529	-2.36953	-0.747501	-1.79938	-0.310726	0.662491	0.667377	-0.859382	-1.90149	1.10366	-1.45543	-0.127515	-0.219853	-0.0982011	-1.26977	-0.665422	-1.61861	-0.884787	-1.86973	1.58929	-1.57952	0.108461	-0.00146569	1.10317
-112	-1.82869	-1.09633	-1.76713	-1.12467	-0.812968	-0.733821	0.382545	1.44321	2.6143	2.19658	-1.27564	-0.551099	-2.67146	-0.800754	0.192005	1.67137	-0.910681	-1.61275	1.07435	-1.27661	-0.104552	-0.434821	0.195914	-1.0934	-0.65272	-2.2596	-0.459249	-1.4095	1.7857	-1.666	-0.201776	0.298512	0.692293
-110	-1.46422	-0.726493	-1.79547	-0.914101	-1.10171	-0.797334	-0.0669331	1.40413	1.29078	2.54199	-0.533999	-0.130446	-3.68181	-0.00732844	-0.269687	2.23811	-0.93462	-1.39289	0.784632	-1.15154	-0.162691	-0.733821	0.236464	-1.36993	-0.949277	-2.61625	-0.219853	-1.12076	1.26587	-1.50722	1.19307	0.619986	0.285809
-108	-1.38166	-0.716721	-1.83064	-0.746524	-1.34159	-1.13298	-0.621452	0.707927	0.211059	2.05929	-0.555496	0.368376	-3.19813	-0.0742615	-0.629757	1.62643	-0.995202	-1.30251	0.218876	-1.17255	-0.523251	-1.03136	-0.237441	-1.63229	-1.16962	-1.64597	-0.681545	-1.26684	0.896024	-0.886253	1.83309	0.661025	0.474394
-106	-1.08998	-0.768998	-1.31814	-0.796846	-1.00839	-1.27515	-0.935597	0.0136798	0.678614	2.02558	-0.466089	0.33662	-1.3797	-0.741638	-0.695225	0.733333	-0.917521	-1.03624	-0.110415	-0.967354	-0.818342	-1.03282	-0.669819	-1.04064	-1.07728	-0.262358	-1.04064	-1.34501	1.5932	-0.24477	0.754829	0.478303	0.744569
-104	-0.435309	-0.526182	-0.755806	-0.580901	-0.813945	-0.608749	-1.07142	0.138752	2.30406	3.33102	-0.415767	0.153409	0.13582	-0.190051	-0.680079	1.03331	-0.707439	-0.514945	0.0224739	-0.493937	-0.773395	-1.25121	-0.395736	-0.413324	-0.442149	-0.08159	-0.667865	-1.07386	3.21083	0.181745	-0.257473	0.222296	0.241839
-102	-0.14608	-0.274572	-0.924361	-0.352254	-1.24632	0.0263824	-1.25756	0.385476	3.33493	4.12151	-1.0211	-0.0776815	0.0928269	0.270664	-0.714767	1.7642	-0.671774	-0.306329	-0.019054	-0.361048	-0.748967	-1.79547	-0.122629	-0.754829	0.119209	-0.238907	-0.290206	-0.834465	3.89042	-0.201776	-0.995202	0.185654	-0.483188
-100	-0.369842	0.0239396	-1.18525	-0.162203	-1.59809	0.0791472	-1.52871	0.0762158	2.40177	2.80777	-1.29029	-0.154386	-1.39924	-0.740661	-0.787563	1.82527	-0.682033	-0.288252	-0.497357	-0.394759	-0.866222	-2.04561	-0.216433	-1.2429	0.193959	-0.267244	0.0752387	-0.552076	2.47799	-1.39875	-1.20186	0.523251	-0.477814
-98	-0.650765	0.431889	-0.607772	0.426515	-1.11148	0.479769	-1.83553	-0.262358	-0.361048	1.07093	-0.452409	0.282389	-2.55469	-0.925826	-1.10464	1.58881	-0.360071	0.176371	-0.860359	0.0718187	-0.834954	-1.71974	-0.0405507	-0.73089	0.64588	-0.898955	1.05969	-0.0576504	0.131423	-1.99676	-0.208128	1.03771	0.104552
-96	-1.13395	0.298512	-0.1666	0.61168	-0.721607	0.617543	-2.57912	-0.940972	-3.60852	-0.560381	0.258938	0.385476	-3.00075	0.33662	-2.07444	0.792449	-0.307306	0.419675	-1.42172	0.299	-1.10757	-1.70069	-0.271641	-0.271641	0.890161	-2.03633	1.19209	-0.0454363	-2.20586	-1.86387	0.781212	1.30104	0.372773
-94	-1.47497	-0.214479	-0.390362	-0.0889184	-1.13249	-0.239396	-3.45854	-2.00897	-5.20466	-2.20391	-0.167088	-0.360559	-3.27826	0.799289	-3.20155	-0.344437	-0.807594	0.0537419	-2.21807	-0.124095	-1.7129	-2.23517	-1.23216	-0.596535	0.0332223	-2.87861	0.107972	-0.403064	-3.57384	-1.69776	-0.122629	1.20919	-0.229136
-92	-1.14959	-0.476837	-0.674705	-0.702553	-1.93422	-1.12956	-4.05556	-2.76282	-5.20026	-3.37108	-1.06653	-1.04308	-2.51854	0.819808	-3.86502	-1.05481	-1.24046	-0.292649	-2.75842	-0.482211	-2.1614	-2.99538	-2.10375	-1.11295	-0.890161	-2.61088	-0.32636	-0.548167	-3.88114	-1.03184	-1.38801	0.996179	-0.665422
-90	-0.945857	-0.797823	-0.989828	-0.856939	-2.88496	-1.4354	-4.71365	-3.20057	-5.05809	-4.13324	-1.67137	-1.09878	-1.30935	0.807106	-4.31401	-1.58587	-1.51454	-0.497845	-3.18103	-0.680568	-2.50633	-4.05947	-2.41203	-1.56193	-1.21115	-2.12134	-0.0537419	-0.764112	-3.79076	-0.752875	-1.5077	0.730401	0.192005
-88	-1.7256	-1.65281	-1.11441	-0.917032	-3.01785	-1.25267	-4.9809	-3.11117	-4.14057	-3.13657	-2.01728	-1.15203	-0.70011	0.395736	-4.33795	-1.73342	-1.495	-0.602398	-3.18347	-0.677148	-2.5415	-4.44885	-2.12525	-1.33084	-1.18281	-2.48972	0.122141	-1.39485	-2.62602	-1.06604	-1.66746	0.619986	1.96451
-86	-2.53662	-2.38516	-0.933155	-0.875993	-2.05147	-0.70695	-4.30326	-2.32018	-1.71827	-0.282389	-1.82038	-1.18379	-0.229136	0.10553	-3.64419	-1.11295	-1.00888	-0.55745	-2.53613	-0.314634	-2.07786	-3.64126	-1.43442	-0.578947	-0.827137	-2.89864	0.223273	-1.92689	-0.41479	-0.146569	-1.41732	0.721607	3.02567
-84	-1.9694	-1.70362	-0.676659	-0.556473	-1.19796	-0.242327	-3.41701	-1.77544	-0.070353	1.16082	-0.827137	-0.428469	-0.537419	-0.576504	-2.86493	-0.785609	-0.508594	-0.280435	-2.04854	0.108949	-1.58734	-2.69296	-1.00839	-0.125561	-0.459737	-2.93773	-0.203731	-1.39192	0.555984	0.54035	-0.286298	0.664445	1.67235
-82	-0.865733	-0.386942	-0.541327	-0.285321	-1.23362	-0.320986	-3.34226	-1.96744	-1.82429	-6.2536e-08	-0.160249	0.452409	-1.60053	-1.12663	-2.92991	-1.22092	-0.376193	-0.0298023	-2.37099	0.23793	-1.57366	-2.50486	-1.15887	-0.176371	-0.510059	-2.68221	-0.708416	-0.412347	-1.07875	-0.904329	0.63904	0.427004	-0.407461
-80	-0.705973	-0.133866	-0.599466	-0.428469	-1.79205	-0.551099	-3.83277	-2.34266	-4.82553	-1.80035	-0.877459	0.397201	-1.95865	-0.137775	-3.69695	-1.53653	-0.432378	-0.13582	-2.88447	0.132889	-1.84042	-2.87568	-1.31814	-0.530091	-0.631712	-2.11792	-0.363979	-0.288252	-3.12289	-1.99138	0.868664	0.496868	-0.62878
-78	-1.04797	-0.648323	-0.474394	-0.768021	-1.82722	-0.404041	-4.00768	-2.67341	-5.39813	-3.6012	-1.78716	-0.483188	-1.27124	0.55061	-4.11223	-1.84432	-0.450455	-0.344925	-3.07159	0.0723073	-1.99676	-2.97193	-1.31081	-0.576015	-0.443615	-1.67088	0.000488563	-0.717699	-3.57384	-1.81354	0.00244281	0.72747	0.153409
-76	-0.662491	-0.716233	0.263335	-0.673239	-0.851565	0.192494	-3.41945	-2.86835	-4.04041	-5.43721	-1.34892	-1.02158	-0.228647	-0.307306	-3.52596	-2.49509	-0.17344	-0.10211	-2.84637	0.40111	-1.75345	-2.22296	-1.13444	0.152432	0.180768	-1.67772	-0.264801	-0.623895	-3.33346	-2.07639	-1.29811	0.678614	0.381079
-74	0.121164	-0.1837	0.884298	-0.305352	-0.23451	0.514945	-2.51414	-2.798	-2.6099	-6.29024	-0.111392	-0.647834	0.513968	-0.766555	-2.21514	-2.969	0.0957583	0.287275	-2.5161	0.672751	-1.41243	-1.45005	-0.96882	0.495403	0.530091	-1.82527	-0.600932	-0.0830557	-3.11459	-1.53555	-1.59711	0.294603	-0.118721
-72	0.546702	0.366911	0.744569	-0.125561	-0.750432	0.204708	-2.00946	-2.50779	-1.30349	-4.88709	0.821762	-0.0952697	0.901398	-0.771929	-1.04699	-2.74328	-0.0991782	0.296069	-2.33777	0.435309	-1.32449	-1.48425	-1.00204	-0.215945	0.149012	-1.41585	-0.796846	0.308772	-2.17215	0.619986	-1.17304	-0.252587	-0.640506
-70	0.533999	0.327337	0.270664	0.124583	-1.3582	0.129469	-1.78277	-2.06222	-0.280435	-1.99969	1.39924	0.0405507	0.364468	-1.03966	-0.54377	-2.2811	-0.321963	0.230113	-2.00018	0.215945	-1.24877	-1.64988	-0.795869	-0.90091	0.0371308	-0.533999	-1.19551	0.327337	-0.680568	2.32409	-0.938529	-0.466089	0.0806128
-68	0.345414	-0.0351765	-0.229624	0.594581	-1.42514	0.448989	-1.32205	-1.76273	0.788052	-0.0605817	1.53458	-0.00928269	-1.30642	-0.397201	-0.117255	-2.31237	-0.338574	0.24477	-1.54288	0.186631	-1.10122	-1.26929	-0.514945	-1.21359	0.515434	0.341017	-1.78032	0.198845	0.724538	2.27133	-0.293626	-0.331245	1.1877
-66	0.504685	0.113835	-0.57113	0.972728	-1.1491	0.327337	-0.666888	-1.99138	1.84677	0.0283368	1.06653	0.0635131	-2.06906	0.216433	0.448989	-2.92649	-0.506151	0.157806	-1.34794	0.00439706	-1.09829	-0.639529	-0.772418	-1.30984	0.72063	0.310237	-2.06564	0.298023	1.57317	0.797823	0.684476	-0.133378	0.905307
-64	1.025	0.535953	-0.434332	1.00693	-0.954651	-0.0776815	-0.621452	-2.53075	1.00937	-1.14373	0.558427	0.216433	-0.708904	-0.536442	0.243304	-3.64272	-0.816388	0.104064	-1.53848	-0.252098	-1.30691	-0.622917	-1.27417	-1.06946	0.533999	-0.790494	-1.93911	0.523251	0.712813	-0.674705	0.613635	-0.0864756	0.221807
-62	1.75394	1.03575	0.436775	1.03038	-0.984942	0.0385965	-1.40608	-2.61674	-1.837	-2.58889	0.808571	0.690828	1.22922	-1.39778	-0.773883	-3.74825	-0.927292	0.468532	-1.8541	-0.170997	-1.50233	-1.27661	-1.24339	-0.409904	0.741638	-0.995202	-1.55265	0.965888	-1.64597	-0.595558	-0.400621	-0.370819	0.0273595
-60	2.33875	1.62643	1.24779	1.13053	-1.12125	0.208616	-2.20586	-2.60892	-4.74785	-3.97934	1.10366	1.09633	1.77446	-1.60004	-1.63571	-3.77317	-1.03917	0.877459	-2.21172	-0.0605818	-1.69776	-1.7129	-1.05041	0.0283366	0.963446	0.17002	-1.73928	1.52725	-4.10148	0.663468	-1.10073	-0.599955	-0.42163
-58	2.27866	1.89513	1.431	1.06409	-0.891138	-0.201288	-2.19072	-2.98903	-5.83442	-5.09717	0.923872	1.00986	0.834954	-1.3714	-1.47351	-4.34479	-1.17402	0.946346	-2.40715	-0.137775	-1.77886	-1.30935	-1.31033	0.0508105	0.535953	1.19991	-2.59427	1.7686	-5.28283	1.06018	-0.69669	-0.55403	-0.794403
-56	1.7471	1.70411	1.77983	0.871596	0.408927	-0.66298	-1.08168	-3.00661	-4.15767	-4.76739	1.27417	0.502731	0.725027	-1.28199	-0.171974	-4.49478	-0.77828	1.13151	-1.92494	0.147546	-1.27857	-0.0576504	-1.58636	0.888207	0.150966	1.80035	-2.87715	1.75199	-4.03553	1.01328	-0.326848	-0.465112	-0.0366422
-54	1.38801	1.46911	2.11841	0.723561	1.51748	-0.541327	0.291183	-2.30357	-1.09731	-2.91086	1.77202	-0.212525	1.66942	-1.57366	1.25023	-3.6823	-0.110904	1.38263	-1.01816	0.687896	-0.463157	1.16131	-1.30739	1.72902	0.282389	2.03975	-2.50926	1.73342	-1.34892	2.15896	-0.700599	-0.455829	0.861825
-52	1.4779	1.31423	1.69776	0.717699	1.01132	-0.200799	0.741638	-1.57561	1.05872	-1.324	1.31423	-0.265778	1.47937	-1.62301	1.43002	-2.80924	0.168554	1.31912	-0.512502	0.768021	-0.0542305	1.27124	-0.835442	1.05823	0.473417	1.22825	-2.23127	1.7427	0.53009	2.456	-0.447523	-0.337108	0.159271
-50	1.51406	1.01181	1.1789	0.914589	0.259427	0.00488563	0.620963	-1.02989	2.08763	-0.747012	0.961003	0.21741	0.738218	-1.05725	0.699133	-2.24983	0.360071	1.24388	-0.229624	0.701087	0.205685	0.842771	-0.505174	0.283855	0.639529	0.151454	-1.85605	1.60053	1.21896	1.33378	0.530579	-0.164157	-0.739684
-48	1.06311	0.56087	1.03917	1.01328	0.528625	0.1666	0.902375	-0.576504	2.35634	-1.05725	1.17206	0.176371	0.474394	-0.618032	0.587741	-1.70948	0.798311	1.27075	0.143149	0.869153	0.707927	0.991782	-0.24135	0.524716	0.739195	0.193471	-0.913612	1.12223	0.77828	0.732355	0.925826	-0.296069	-0.128981
-46	0.68985	0.288252	0.990805	0.68985	1.19551	0.0141683	1.35527	-0.498822	1.55461	-2.13209	0.999599	-0.0258938	0.192005	-0.970774	1.20675	-1.33768	1.14079	1.16131	0.235976	1.00058	1.04259	1.5165	-0.252098	1.04601	0.357628	0.818342	-0.0825671	0.644903	-0.695225	0.404041	0.383522	-0.618032	0.665422
-44	0.780723	0.29558	1.09878	0.405507	1.64255	-0.29216	1.794	-0.388896	0.970774	-1.9948	0.748967	0.127515	0.598978	-0.721607	2.02265	-0.906772	1.36504	1.15252	0.378148	1.17988	1.29127	1.98747	-0.368376	1.43002	-0.0180768	1.78667	0.0527648	0.591161	-0.983965	0.388896	0.0776815	-0.713301	0.736264
-42	0.991782	0.636597	1.24632	0.662491	1.60444	-0.318054	2.02265	0.0258938	0.960026	-0.135332	0.907261	0.341017	1.60884	0.504685	2.16678	-0.167088	1.49012	1.33329	0.749455	1.40022	1.50624	2.13062	-0.341505	1.49549	0.273107	2.46382	-0.058139	0.882833	0.155363	0.94146	0.211059	-0.62878	0.370819
-40	1.0465	1.06849	1.10513	1.15789	1.20333	-0.0263824	1.61323	0.395736	0.395736	0.857427	1.02256	0.371796	1.86289	1.2087	1.06653	0.437264	1.44224	1.39729	0.778769	1.4652	1.42221	1.8028	-0.116278	1.18037	0.935597	1.8111	-0.0879413	1.17304	0.444103	1.00497	0.153897	-0.600443	0.0102598
-38	1.01132	1.13053	1.00106	1.27417	1.36749	0.123606	1.43247	0.604841	0.173928	0.129469	0.685453	0.445569	2.03242	0.71721	0.366422	0.631223	1.44419	1.37921	0.629269	1.54484	1.29665	1.70753	0.182234	1.30055	1.18623	1.24388	-0.0405507	1.22287	0.0776815	0.831534	0.384987	-0.498822	0.165134
-36	1.1276	1.05188	1.15008	1.00497	1.92347	0.0708416	2.11792	1.00546	1.431	-0.395247	0.213502	0.71721	2.22296	-0.0522762	1.21408	0.918986	1.59271	1.44615	0.93804	1.64011	1.40462	2.09398	0.427004	1.70166	0.984942	1.43295	0.129469	1.20138	0.650765	0.7817	1.03722	-0.347857	0.512502
-34	1.09927	0.740172	1.33817	0.789517	2.08372	0.374239	2.92893	1.87657	3.35007	0.767532	0.254541	0.635131	1.9904	-0.370819	2.41594	1.83406	1.72658	1.42221	1.6743	1.66746	1.73782	2.42767	0.871596	1.65867	0.974194	1.57415	0.444103	1.07875	2.04317	0.916055	1.22971	-0.229624	0.839351
-32	0.935109	0.451432	1.42318	0.830068	2.1101	0.837885	3.27044	2.7081	4.72538	2.74719	0.772906	0.0952697	2.19072	-0.828602	2.92112	2.72716	1.69092	1.23802	2.26009	1.57073	2.07737	2.63628	1.38459	1.5038	1.10317	1.89758	0.672751	0.958071	3.34812	1.3455	0.604352	-0.222785	0.318054
-30	0.849122	0.812968	1.21994	0.824205	2.15114	0.819808	3.20595	2.87568	4.94132	3.55136	1.1877	-0.247213	1.56096	-1.34697	2.98805	2.69296	1.38605	0.923383	2.33484	1.14568	2.0334	2.69638	1.50038	1.34599	0.795869	2.34022	0.629757	1.00742	3.60364	1.19209	0.188585	-0.433355	-1.3411
-28	0.539862	1.10317	0.760203	0.564778	2.07737	0.326848	3.28119	2.44868	4.25587	2.93235	1.44663	-0.0683988	-0.525693	-1.15301	3.35545	2.19365	0.934132	0.478303	2.1443	0.577481	1.72805	2.81265	1.11392	0.998622	0.206662	2.35096	0.640017	0.827625	2.78725	0.826159	0.193471	-0.504685	-2.2938
-26	-0.115789	0.541327	-0.0185654	0.0635131	2.10424	-0.574061	3.60657	1.92689	3.26458	2.53955	0.651254	0.236953	-1.40657	-0.37375	3.9383	2.04121	0.498334	-0.0982011	2.01679	0.0298023	1.4354	3.19031	0.357628	0.664934	-0.4827	2.15896	1.03722	0.148523	2.07199	0.504685	0.315611	-0.319031	-1.74319
-24	-0.576015	-0.434821	-0.738707	-0.74115	1.89025	-1.7686	3.0882	1.40364	1.85312	2.34364	-1.132	0.236953	0.216922	-0.34346	3.38232	1.92298	-0.0854985	-0.833976	1.63571	-0.624383	0.895047	2.85418	-0.477814	0.405996	-1.47937	2.38614	1.1535	-0.657117	1.32156	-0.385964	0.736752	-0.174905	-0.698645
-22	-0.480746	-1.22825	-0.79538	-1.26196	1.14861	-1.901	1.70313	1.19307	0.362025	1.9948	-1.58294	-0.217899	2.22296	-0.817854	1.70118	1.92298	-0.530091	-1.33133	1.2087	-1.01719	0.367888	1.4994	-0.506639	0.171485	-1.80182	2.47506	1.04797	-1.14861	0.376193	-1.13395	0.219365	-0.123606	0.341994
-20	-0.527159	-1.60884	-0.494914	-0.983965	0.748478	-0.623895	1.10611	1.6743	-0.38059	2.32849	-0.65956	-0.551587	2.00164	0.361048	0.843259	2.54492	-0.298023	-1.2175	1.41732	-0.837396	0.503708	0.799289	0.453875	0.093804	-0.963934	1.87852	1.57952	-1.28492	0.105041	-0.891138	-0.22083	-0.110415	0.923383
-18	-0.753852	-1.01621	-0.310237	-0.423584	1.06653	0.399156	1.59565	1.99236	-0.215456	2.39787	0.00195425	-0.274572	-0.114812	1.95327	1.25267	2.83024	0.241839	-0.74115	1.75003	-0.445081	0.940483	1.30153	1.12272	0.0664445	-0.239396	1.495	2.02705	-0.892604	0.30926	-0.363002	0.318543	0.00977125	-0.0801243
-16	-0.870619	-0.10211	-0.422607	-0.22425	1.43247	0.431401	1.89807	1.50673	0.692782	1.62252	0.0210082	-0.0776815	-1.21408	2.28892	1.52774	2.1658	0.435309	-0.486608	1.61861	-0.339551	0.977125	1.7857	0.917521	-0.0532533	-0.197868	1.29665	1.70313	-0.443126	0.673239	-0.519831	0.288741	0.379613	-1.36602
-14	-1.5165	-0.587741	-0.939995	-0.709882	0.840816	-0.119698	1.19551	0.772906	1.55412	1.4481	-0.337108	-0.239396	0.0552076	2.31188	0.963446	1.41927	-0.0268709	-0.966865	1.14715	-0.821762	0.432867	1.13493	0.381079	-0.378148	-0.683011	0.385965	1.26049	-0.997156	1.44028	-0.718676	0.470486	0.719164	-0.455829
-12	-2.46871	-2.00115	-1.6533	-1.62789	-0.915566	-0.845213	-0.321474	0.231579	1.18281	2.06222	-0.829579	-0.672262	1.32889	1.26782	-0.209593	0.943903	-0.955629	-1.87071	0.359094	-1.63766	-0.452898	-0.682522	-0.144126	-1.10317	-1.47693	-1.27026	0.768021	-2.07932	1.89904	-0.452898	0.478791	0.716721	1.42416
-10	-2.44819	-2.34119	-1.78716	-1.7984	-1.6787	-0.775349	-1.32498	0.264312	-0.250144	2.65632	-1.30349	-0.866222	0.453875	0.000977125	-1.44126	0.895047	-1.30202	-1.9904	-0.0649788	-1.80231	-0.767043	-1.65965	-0.0933155	-1.31668	-1.54728	-2.7892	0.686431	-2.21319	1.53604	-0.64246	-0.220342	0.522273	1.89513
-8	-1.52529	-1.44126	-1.32254	-1.08314	-0.768509	0.107972	-1.2517	0.576015	-1.3499	2.25227	-1.42416	-0.324406	-1.30153	0.145592	-2.07688	1.00058	-0.881856	-1.25219	0.0776815	-1.26977	-0.403553	-1.05774	0.516899	-0.761669	-0.732844	-2.98268	1.23802	-1.35625	0.610703	-1.15936	-0.339551	0.271152	1.15838
-6	-0.788052	-0.516411	-1.08803	-0.534976	-0.714767	0.575038	-1.71046	0.117744	-2.51707	0.00146572	-1.21603	0.157317	-2.39347	0.537907	-2.70664	0.214479	-0.842282	-0.839839	-0.381567	-1.08656	-0.502242	-1.28052	0.632689	-0.63562	-0.175883	-2.6226	1.1447	-0.603863	-1.27759	-1.3411	-0.0952697	0.0879413	0.270175
-4	-0.0449478	0.381567	-0.862802	-0.203731	-1.83846	0.576504	-3.01981	-0.816388	-4.50455	-2.47701	-0.743592	0.647346	-2.47994	1.0592	-3.75949	-1.03184	-1.21212	-0.749455	-1.3797	-1.22678	-1.10317	-2.60453	0.3161	-1.01328	-0.0845213	-2.97926	0.168066	-0.00683988	-3.46	-1.21115	0.220342	0.247213	-0.816877
-2	1.1916	1.28785	-0.174417	0.257473	-2.34901	0.901887	-3.57481	-1.0934	-5.53297	-3.0242	0.177837	1.52529	-1.74808	1.99529	-4.24317	-1.62594	-1.11734	-0.326848	-1.68505	-1.004	-1.25707	-3.0457	0.463646	-1.16229	0.179302	-2.77943	-0.704507	0.759715	-3.93977	-0.586764	0.580412	0.545236	-1.67772
0	1.67724	1.02256	0.457783	0.633177	-2.136	1.63033	-3.5157	-0.753364	-4.76593	-2.30308	1.11392	1.65818	-1.52432	1.90344	-4.25734	-1.60297	-0.627314	0.194936	-1.35723	-0.436286	-0.916055	-2.85809	1.0724	-0.749944	0.858893	-1.83113	-1.03917	0.930712	-2.92209	0.1495	0.691316	0.656628	-0.711347
2	0.447523	-0.601421	0.586764	0.631712	-1.89953	2.2938	-3.5069	-0.320986	-3.26311	-1.15838	1.2986	0.816877	-2.00946	0.993248	-4.19138	-1.15008	-0.248678	0.299	-1.05334	-0.0170997	-0.529602	-2.9006	1.65232	-0.153409	1.4906	-1.45836	-0.559893	0.050322	-1.50673	0.952209	0.61852	0.776815	2.12867
4	-1.12125	-1.77593	0.408927	0.578947	-1.63864	2.62407	-3.1224	0.299	-1.71534	0.807106	0.253075	0.450943	-2.00213	1.49696	-3.69598	-0.125072	0.15292	0.263824	-0.625849	0.280435	-0.0654674	-2.63433	2.14528	0.0400621	1.70704	-1.7173	0.792449	-0.856939	0.22767	1.39387	0.943415	0.924849	4.37215
6	-1.16962	-1.27026	0.283366	0.972728	-1.56096	2.70517	-2.89571	0.73773	-1.19112	1.94936	-0.904818	1.06067	-1.48914	2.157	-3.55185	0.674217	0.660537	0.6151	-0.256007	0.698645	0.329291	-2.37197	2.44281	-0.146569	1.86289	-2.60453	1.6875	-0.671285	0.907261	0.471463	1.64792	0.765578	3.94807
8	-0.1324	0.0933155	0.356162	1.52138	-1.72707	2.78285	-3.33542	0.507617	-1.77544	0.736753	-0.749455	1.48865	-0.957094	1.07826	-4.00817	0.609238	0.855962	1.05627	-0.502242	0.983965	0.375705	-2.63042	2.44086	-0.401599	2.26156	-3.37157	1.32498	0.256007	-0.206173	-1.16034	1.77397	0.415767	2.02216
10	0.148523	0.857427	0.360071	1.74954	-1.62056	2.86298	-3.57432	0.152432	-1.83455	-0.711836	-0.495891	1.12027	-1.08168	-0.0747501	-3.88456	0.311214	0.891627	1.18281	-0.866222	1.13982	0.347368	-2.74475	2.3451	-0.307795	2.4775	-3.0286	0.57455	0.752387	-1.01084	-2.54443	1.48914	0.404041	1.20773
12	-0.169531	0.668842	0.164157	1.61812	-1.18574	2.39005	-3.20546	-0.263335	-0.962468	-0.728935	-1.0724	0.780723	-1.78423	0.0170997	-2.9988	-0.23793	0.976637	1.06018	-0.912146	1.27222	0.41137	-2.33435	1.83113	0.0811014	2.12427	-2.25863	0.0454363	0.668842	-0.498334	-3.21132	1.37237	0.647346	1.46911
14	-0.0757272	0.170508	0.00928272	1.19796	-0.768021	1.26147	-2.64117	-1.19405	-0.410393	-0.819808	-1.23802	0.688385	-1.35527	0.151943	-2.02363	-1.53116	0.90433	0.820785	-1.03136	1.20333	0.346391	-1.72169	0.64588	0.232556	1.34599	-1.64939	-0.526182	0.448012	-0.136798	-2.20586	0.820297	0.579435	1.50135
16	0.24135	-0.0200311	0.0908727	0.78854	-0.839839	0.38059	-2.80044	-2.37295	-1.49402	-2.41497	-0.626826	0.430424	-0.0654674	-0.869642	-2.08714	-2.96264	0.617055	0.591649	-1.61959	0.961491	-0.0752387	-1.71583	-0.451432	0.0102598	0.702553	-1.13542	-1.26098	0.333688	-1.21066	-0.167088	-0.113347	0.107972	1.26977
18	0.644903	0.323428	0.501754	0.750432	-1.0338	0.378636	-3.67888	-2.98219	-3.74581	-4.01452	0.0791472	0.228159	-0.406973	-1.50819	-3.31441	-3.69109	0.437752	0.710859	-2.29282	0.961491	-0.47586	-2.16384	-0.761181	0.104064	0.794403	-1.03624	-1.65281	0.56771	-2.82194	0.914101	-0.360071	-0.347368	0.65614
20	0.73089	0.660048	0.787563	0.892115	-0.505662	0.73773	-3.7717	-2.75159	-4.65747	-3.61732	0.150477	0.24477	-2.1785	-0.55061	-3.7463	-3.50641	0.632689	1.04846	-2.30553	1.26391	-0.347368	-1.82869	-0.494914	0.69327	1.24632	-1.49989	-1.66502	0.775837	-2.99587	0.932178	0.163668	-0.417721	-0.143637
22	0.221319	0.513968	1.03771	1.025	0.760203	0.829579	-2.69003	-2.19902	-2.7081	-2.05929	-0.287763	0.38059	-1.75247	0.41821	-2.5459	-2.98658	1.10953	1.29518	-1.72902	1.60151	0.129469	-0.719653	-0.239396	1.58441	1.4481	-1.67724	-1.61617	0.594581	-1.34404	1.18525	0.556473	-0.0644903	-0.165623
24	0.0811014	0.578947	1.66746	1.10562	1.50086	0.473906	-1.85312	-2.14968	0.244281	-1.90442	-0.0170997	0.296558	0.264312	0.106995	-1.19942	-3.10872	1.3499	1.45054	-1.47155	1.77006	0.314146	-0.155363	-0.477814	2.33484	1.25561	-1.20724	-1.77935	0.661025	0.256984	1.19307	0.174905	0.249656	0.0200311
26	0.472929	0.990805	1.80524	1.08852	0.869642	0.114324	-2.02167	-2.66657	0.719164	-3.62611	1.08852	-0.007817	-0.446058	-0.926803	-0.913612	-3.77415	1.12711	1.42807	-1.8282	1.67382	0.0366422	-0.509082	-0.925338	2.05587	1.07044	-1.05041	-2.0334	0.992271	-0.208616	0.0522761	-0.319031	0.0576504	-0.133378
28	0.92778	1.14617	1.3543	1.24241	0.0830557	0.202753	-2.47262	-2.95727	-1.79205	-4.95305	1.74075	0.100155	-3.12338	-1.38752	-1.59369	-4.01989	0.935597	1.28199	-2.18143	1.54874	-0.199334	-0.803197	-1.01768	1.25609	1.20773	-1.79449	-1.95962	1.09389	-2.23957	-1.34404	0.120675	-0.48612	-0.123118
30	1.19551	0.934132	1.14959	1.27613	-0.17002	0.0576504	-3.04863	-3.05107	-5.11525	-4.60617	1.3284	0.216433	-4.11223	-1.3626	-3.03642	-3.83961	0.755318	1.05676	-2.48288	1.37042	-0.444592	-1.19209	-1.17597	1.09487	1.02305	-2.72765	-1.90197	0.918009	-3.86746	-2.1228	0.468043	-0.935109	0.023451
32	0.767532	0.165623	1.06604	0.688385	-0.611192	-0.654185	-3.79809	-3.06915	-6.38258	-2.92893	1.27417	-0.519831	-1.67528	-1.85214	-4.38632	-3.66617	0.367399	0.601909	-2.71201	0.942437	-0.855962	-2.12622	-1.61519	1.06458	0.140706	-2.32409	-2.35389	0.372285	-3.43655	-0.687896	-0.763135	-0.895047	0.913124
34	-0.0835442	-0.556961	0.427981	-0.187608	-1.46569	-1.48963	-4.27737	-3.05254	-4.80648	-1.53311	1.1877	-1.18232	1.60688	-2.05685	-4.52262	-3.55625	-0.172951	-0.122629	-2.78041	0.268221	-1.27222	-3.00026	-2.09398	0.257473	-0.89407	-0.975171	-3.01248	-0.196891	-1.70655	1.34648	-2.25521	-0.532533	1.54239
36	-0.192982	-0.0850099	-0.0420164	-0.512014	-1.47497	-1.78912	-3.79125	-3.03544	-2.30602	-1.602	-0.0796357	-0.640506	2.36709	-1.13102	-3.1908	-3.16051	-0.481234	-0.429447	-2.62602	-0.0459249	-1.3157	-2.77406	-2.18192	0.0141683	-1.14421	-0.214479	-2.87763	0.00293138	-0.664934	0.812968	-1.89465	-0.328803	0.576993
38	0.531556	0.907261	0.556473	-0.0112369	-0.111392	-1.30495	-2.32458	-2.74035	-0.595558	-2.03535	-0.400133	0.381567	1.36944	-0.470974	-1.26635	-2.50144	-0.22425	0.115789	-2.14332	0.32978	-0.902375	-1.38605	-1.80719	1.12711	-0.437264	0.0112369	-1.93666	0.727958	-0.546702	0.253075	-0.298023	-0.288252	-0.168554
40	0.747501	0.926315	0.835442	0.293626	0.480257	-0.993248	-1.43784	-2.49753	-0.0664446	-1.51601	0.25161	0.295092	-0.831045	-1.59174	-0.444592	-2.07199	-0.269198	0.372285	-1.95816	0.370331	-0.87697	-0.637086	-1.70411	1.43295	-0.10553	-0.956117	-1.48083	0.910192	-0.53009	0.777792	0.246236	-0.268709	-0.141195
42	-0.120186	0.00977122	-0.193471	-0.358605	-0.574061	-1.55851	-1.61421	-2.7125	0.0923383	-0.832999	-0.0473906	-0.811014	-3.55478	-3.60804	-0.902864	-2.08909	-1.04748	-0.42505	-2.23078	-0.459737	-1.50233	-1.12907	-2.21661	0.0146569	-0.940483	-2.61625	-1.85116	0.212525	-0.349811	0.481723	-1.17157	-0.309749	-0.180768
44	-0.896513	-1.00595	-1.21261	-1.45299	-1.22678	-2.56007	-1.56389	-3.02225	0.554519	-1.22043	-0.410393	-1.49793	-3.80737	-4.26076	-1.20528	-2.3622	-1.80377	-1.44126	-2.3368	-1.40559	-2.00653	-1.19844	-2.85272	-1.11295	-2.28989	-1.98063	-2.51756	-0.78512	-0.0864756	-0.319031	-2.85418	-0.237441	0.208128
46	-1.00595	-1.49012	-1.42563	-2.0461	-0.841793	-3.27826	-1.0465	-2.92893	1.19209	-1.35185	-0.379125	-1.42856	-1.27026	-3.18103	-1.11832	-2.37539	-2.13502	-1.89807	-2.10326	-1.89709	-2.02656	-0.602886	-3.08527	-1.00497	-3.06133	-0.119209	-3.17615	-1.35674	0.667865	-0.990317	-3.16295	0.0747501	0.671285
48	-1.26831	-1.36846	-1.34697	-1.77593	-0.588718	-3.14781	-0.663468	-2.44184	1.8409	-0.466089	-0.748478	-0.892604	1.25267	-1.7085	-0.819808	-2.00018	-2.18925	-1.87755	-1.62056	-1.97086	-1.78179	-0.414301	-2.81803	-0.705485	-2.8322	0.288252	-3.09553	-1.39827	1.60249	-0.487097	-2.30308	0.185165	0.831045
50	-1.83602	-1.19796	-1.39973	-1.25903	-0.310237	-2.30162	-0.0410392	-1.81501	2.67732	0.25503	-1.51601	-0.277992	0.973705	-0.0586275	0.294115	-1.34697	-1.96353	-1.71681	-0.989828	-1.81159	-1.34892	-0.195425	-2.14186	-0.638551	-2.13111	0.164157	-1.70411	-1.36553	2.21563	0.728447	-1.14763	-0.0879413	1.20724
52	-2.26058	-1.34599	-1.82576	-1.30935	0.420652	-1.76127	0.972728	-1.39289	3.46098	0.459737	-2.50291	-0.489051	-1.60591	0.685453	1.74515	-0.660537	-1.78765	-1.83406	-0.626337	-1.83748	-0.994225	0.687896	-1.57415	-0.699622	-1.75394	0.163668	-0.675194	-1.50135	2.51854	-0.406973	-1.1193	-0.139729	1.29371
54	-2.20928	-1.46813	-2.08812	-1.62838	1.04699	-1.62447	1.63278	-1.16278	3.30415	0.715256	-2.78872	-1.42856	-2.75891	-0.536442	2.18827	-0.165134	-1.76176	-2.10766	-0.522273	-1.97721	-0.892115	1.4481	-1.31326	-0.663957	-1.60786	-0.466089	-1.19893	-1.55803	2.37197	-2.42181	-2.55958	0.054719	0.732844
56	-1.77739	-1.44957	-1.81012	-1.69531	0.663957	-1.53604	1.11979	-0.999599	1.33573	0.749455	-1.82087	-1.90295	-2.62602	-1.4437	1.2771	0.189562	-1.91077	-2.2342	-0.705973	-2.08323	-1.13298	1.03722	-1.24681	-0.716721	-1.57659	-1.37091	-1.40608	-1.45738	1.09438	-2.41155	-3.07648	0.224739	0.0986897
58	-1.4266	-1.52187	-1.48914	-1.63131	-0.246724	-1.53848	0.173928	-0.820297	-1.3499	0.530579	-1.00497	-1.46569	-2.76331	-0.94488	0.375216	0.603863	-2.08909	-2.29429	-0.991782	-2.15554	-1.40853	0.179791	-1.16815	-1.0553	-1.794	-0.904818	-0.155851	-1.44321	-0.628292	-2.06515	-1.6831	0.526671	0.00830557
60	-1.31961	-1.47057	-1.49842	-1.48963	-0.540839	-1.63424	-0.0332222	-0.48954	-2.07981	0.996179	-1.16718	-0.914101	-1.77739	-0.648811	0.360559	1.12418	-1.99578	-2.26547	-0.917521	-2.08958	-1.28541	0.0117255	-0.964911	-1.4012	-1.94497	0.546213	1.07533	-1.50428	-0.902375	-1.92201	-0.447035	0.600443	0.0117255
62	-1.64011	-1.26977	-1.65965	-1.3885	-0.294603	-1.837	0.232067	-0.288741	-1.02745	1.14324	-1.72805	-0.590184	-0.56429	-0.982988	0.605329	1.20431	-1.86778	-2.18192	-0.755318	-1.97379	-1.09194	0.197379	-0.889673	-1.37872	-1.87901	0.877459	1.004	-1.54484	-0.596535	-1.33866	-0.266755	0.317077	-0.523251
64	-2.3153	-1.28834	-1.68066	-1.27124	0.273595	-1.60249	0.842282	-0.200311	-0.00732847	0.207151	-2.33338	-0.490028	-0.505662	-0.928758	1.37872	0.812968	-1.6743	-1.99382	-0.570153	-1.72023	-0.873061	0.672751	-0.723073	-0.824694	-1.52822	0.633177	-0.0986897	-1.63229	-0.705484	-1.3499	-0.515434	0.297046	-0.507128
66	-2.51561	-1.30691	-1.90539	-1.18086	0.204708	-1.30984	1.31179	-0.158783	0.476349	-0.500777	-2.77162	-0.782189	-0.697667	-0.842282	2.35048	0.263824	-1.57952	-1.84726	-0.505662	-1.64743	-0.785609	0.920452	-0.55745	-0.908727	-1.30739	0.63904	-1.41488	-1.73	-0.564778	-1.85898	-0.490028	0.529113	0.0806128
68	-2.12818	-1.09633	-2.14088	-1.14959	-0.811991	-1.46618	0.629269	-0.38401	-0.512991	-0.971751	-2.85858	-0.760203	-0.355185	-1.25414	1.90686	-0.600443	-1.70215	-1.77837	-0.914101	-1.70215	-1.06604	0.0473906	-0.734798	-1.4608	-1.41195	0.360559	-2.15114	-1.64548	-1.00595	-1.80231	-0.131423	0.626826	0.755806
70	-2.13404	-1.09682	-1.99138	-0.987385	-1.48816	-1.35478	-0.525205	-0.449966	-2.67146	-1.34062	-2.44819	-0.0967354	0.361536	-0.949766	0.531556	-1.06458	-1.57464	-1.5419	-1.17792	-1.37579	-1.17499	-1.04357	-0.709882	-1.40511	-1.23118	0.325871	-1.85654	-1.63424	-2.18046	-1.23704	0.299977	0.716233	2.24495
72	-2.63824	-1.3753	-1.77397	-0.829091	-1.62154	-0.978102	-0.957583	-0.0395736	-3.79613	-1.00253	-1.83602	0.073773	0.352254	-0.929246	-0.168554	-0.56429	-1.30593	-1.28052	-0.996179	-0.966865	-1.01719	-1.44077	-0.286298	-1.26293	-0.872084	0.485143	-1.20822	-1.79547	-2.90109	-0.461692	0.0117255	0.81248	3.19227
74	-2.74914	-1.2771	-1.40706	-0.4656	-1.28199	-0.388896	-0.476349	0.675194	-2.99098	-0.400133	-1.56487	-0.293138	-0.689362	-2.0075	0.0674216	0.291672	-0.940972	-0.894558	-0.538885	-0.592138	-0.640994	-1.04797	0.379613	-0.967354	-0.365933	0.507128	-0.464135	-1.58539	-2.75403	0.0537419	-0.927781	0.808083	2.50877
76	-1.95034	-0.535953	-0.518854	0.460226	-0.0933155	0.734798	0.792937	1.64352	-0.715256	0.13582	-1.367	0.0459249	-1.02061	-1.79009	1.19893	1.01328	-0.121164	-0.0498334	0.37717	0.230113	0.201776	0.179791	1.41585	0.0884298	0.633666	1.15447	0.759715	-0.794891	-1.45103	-0.364468	-0.662002	0.811014	1.60933
78	-0.888695	0.272618	-0.115301	1.0807	0.834465	1.35039	1.7085	2.19658	1.09438	0.643437	-1.64694	0.77828	-1.06653	-0.724538	2.20635	1.00497	0.474394	0.584809	1.00742	0.811991	0.801731	1.06018	2.02705	0.871596	1.17304	1.20333	1.30642	-0.108461	-0.0083056	-1.70802	0.454852	0.782189	1.26098
80	-0.309749	0.626337	-0.645391	1.05383	0.708904	1.18281	1.66795	2.14137	1.1618	1.14226	-2.35048	1.06262	-2.57863	0.0727958	2.04952	0.558427	0.457295	0.553053	1.01523	0.733333	0.804663	0.933643	1.97135	0.538885	0.883321	-0.0239396	1.0978	0.103087	0.484654	-3.20693	1.44419	0.800266	1.33573
82	-0.324406	0.475372	-0.575527	1.05823	0.668354	1.11881	1.49158	2.22491	0.572595	1.26538	-1.71437	1.04552	-3.46244	1.57171	1.23509	0.620475	0.527159	0.530579	1.22385	0.814923	1.00693	0.886253	2.04366	0.298023	0.753364	-0.573084	1.11783	0.0332223	0.237441	-2.82585	1.88829	0.829579	2.12964
84	-0.56429	0.256007	0.0884298	1.14177	0.626826	1.12125	1.29518	2.24934	0.277504	0.0737729	-0.344925	1.0851	-2.10668	2.42034	0.411858	0.711836	0.744081	0.734798	1.3797	1.04601	1.30593	0.829579	2.06711	0.34004	0.997645	-0.443615	0.866222	0.0576504	-0.709393	-0.69669	1.34794	0.608749	2.70468
86	-0.317077	0.686431	0.339551	1.21017	0.115789	1.16766	1.07581	2.09154	0.45192	-1.57073	-0.0923383	1.2175	-0.644414	1.10513	0.0703531	0.42163	0.855473	0.892115	1.24339	1.10806	1.37579	0.513479	1.96695	0.115301	1.2175	-0.712324	0.275549	0.653697	-1.63033	0.245258	0.660048	0.419187	1.83211
88	0.430912	1.65574	0.671774	1.42074	0.175394	1.31081	0.910681	1.90735	-0.0869641	-2.72618	0.0161226	1.5932	-0.240861	-0.47928	-0.0371308	-0.0776815	1.07679	1.08852	1.15985	1.25023	1.5038	0.55061	1.99285	0.388896	1.21945	-0.907261	-0.0117255	1.43735	-2.38712	0.0600932	0.549633	0.444592	0.662491
90	0.381079	1.69678	0.931689	1.42221	0.682033	1.3201	0.0102598	1.3543	-2.44623	-3.7419	0.293626	1.65427	-0.578458	-0.198845	-1.2219	-0.792937	1.1364	1.06409	0.751409	1.21164	1.43735	0.372773	1.86973	1.00888	1.03624	-1.16864	-0.208128	1.21945	-3.65836	-0.216922	0.530579	0.62536	1.33182
92	-0.424561	0.73089	0.495403	1.22727	0.54377	1.56584	-1.44517	0.830068	-5.14212	-3.84548	-0.148034	1.06165	-1.4608	0.965888	-3.14097	-1.1706	0.965888	0.74115	0.073773	0.915566	1.13493	-0.383522	1.79058	0.810037	1.15399	-1.88976	-0.488074	0.268221	-4.69606	-0.841305	0.640506	0.690339	2.9988
94	-0.563313	0.420652	-0.0366422	1.52041	-0.0522762	2.05343	-2.21954	0.689362	-6.75878	-3.65249	-0.591649	1.13591	-2.01483	0.863779	-4.01599	-1.28981	0.961003	0.674216	-0.240373	0.858405	1.05578	-0.841793	1.87022	0.0449478	1.73684	-2.16873	-0.531068	0.0864756	-5.3737	-1.23069	1.37824	0.47928	3.47905
96	-0.324406	0.621452	-0.058139	1.88341	-0.300466	1.88145	-2.2513	0.520319	-7.12471	-4.24072	-0.960514	1.62349	-2.61528	-0.372773	-3.96078	-1.62154	1.07728	0.830068	-0.236464	1.00106	1.22434	-0.786097	1.73293	-0.260404	1.82234	-2.6226	-0.338574	0.481234	-5.83881	-1.52138	1.86191	0.354696	3.3149
98	-0.838374	0.183211	0.0664445	1.65525	-0.120186	1.23948	-2.09691	0.408438	-6.38551	-4.42149	-1.96842	1.3157	-3.88163	-0.707927	-3.87235	-1.67284	1.14568	0.765089	-0.110904	1.00644	1.38361	-0.588718	1.5121	-0.0200311	1.18623	-3.82545	-0.149989	0.29558	-5.53688	-2.02021	1.72805	0.454852	3.91974
100	-1.21066	-0.172951	0.527648	1.5038	0.606306	1.46325	-1.7471	0.853519	-5.41523	-3.55234	-2.30308	0.985431	-3.89336	0.476837	-3.70184	-1.22874	1.4696	0.869153	0.322451	1.25512	1.75736	-0.106507	1.86142	0.732844	1.1618	-3.75705	-0.0625361	0.0410393	-4.68385	-1.97477	1.79449	0.747012	4.85534
102	-0.440684	0.345414	1.31179	1.93959	1.48865	2.5332	-1.38947	1.76127	-4.51285	-2.28305	-1.23216	1.0465	-2.58254	1.53848	-3.41701	-0.825671	2.0759	1.45299	0.937063	1.93569	2.42181	0.45876	2.82487	1.56877	2.0461	-2.56202	-0.341505	0.506151	-3.58361	-1.43198	1.65623	0.97566	4.87341
104	0.513479	1.18623	1.76909	2.66511	1.98894	3.48492	-1.05383	2.60599	-3.22793	-1.26929	-0.186142	1.45885	-1.75687	2.45307	-2.83708	-0.543282	2.76429	2.15212	1.55412	2.64312	3.09749	0.818831	3.81225	1.96158	2.95727	-1.98552	-0.338085	1.22043	-2.40373	-0.835931	1.51406	0.687408	4.02576
106	0.952697	1.76273	1.93422	3.18641	2.32312	3.9642	-0.619497	3.15611	-1.99969	-0.569664	0.0908727	2.25863	-1.93959	3.51032	-2.18925	-0.179791	3.38427	2.66511	2.15994	3.11068	3.59045	1.09682	4.3697	2.32018	3.39551	-1.97526	0.395736	1.69873	-1.40853	-0.681056	2.04757	0.415278	3.03349
108	0.9825	1.81061	2.2811	3.34714	2.86444	4.30619	-0.202265	3.4771	-1.60004	0.0254052	0.177348	2.44868	-3.26751	3.71796	-2.0676	0.254541	3.82349	2.99196	2.6226	3.45121	3.93146	1.53262	4.6648	3.17615	3.7077	-1.76078	1.19405	1.74759	-0.780723	-1.27515	2.05099	0.620963	2.44574
110	0.533022	1.37237	2.74377	3.50788	3.85134	5.01852	0.54377	3.94221	-1.62154	0.527648	-0.0141683	1.92689	-4.17281	3.60608	-1.76176	0.863779	4.28909	3.24259	3.20839	3.91681	4.4723	2.51561	5.25156	4.2759	4.35358	-0.687896	1.83651	1.53311	-0.400133	-1.84286	1.50868	0.95856	2.83464
112	-0.634154	0.407461	2.22491	3.29047	3.99107	5.24521	0.831534	3.8318	-2.11694	-0.301932	-1.16864	1.10024	-3.77903	2.76673	-1.52822	0.699133	4.165	2.87861	3.23722	3.78783	4.55243	2.93773	5.37614	3.97348	4.42003	-0.0928269	1.45201	0.845213	-0.974194	-1.92543	1.09829	1.19698	3.93195
114	-1.74661	-0.646857	1.02745	2.755	3.10091	4.85045	0.517876	3.24601	-2.26693	-1.46227	-2.04073	0.458272	-2.40666	1.1706	-1.67528	0.0747502	3.55576	2.13551	2.77992	3.10824	4.05654	2.40519	5.04636	2.57766	3.79955	-0.826648	0.57113	-0.0835442	-1.58343	-0.971751	1.12027	1.2004	4.62473
116	-2.00311	-1.14519	0.180768	2.44477	2.39103	4.72636	0.910192	3.51765	-0.417721	-0.30584	-2.12818	0.535953	-0.199822	0.137775	-1.09145	0.472929	3.29975	1.73342	3.09358	2.66413	3.8616	2.09789	5.17974	1.59613	3.44144	-1.2302	0.496868	-0.494425	-0.0815898	-0.442149	1.76518	0.917032	4.21483
118	-1.83504	-1.132	-0.389873	2.01337	1.52774	4.464	1.28981	3.83717	1.5077	1.25707	-2.37783	0.446546	0.824205	-0.215945	-0.495891	1.11246	2.83464	1.29567	3.45707	2.093	3.58849	1.58294	5.03904	0.97224	3.10286	-0.860847	0.420652	-0.580412	1.74466	-1.18672	1.59125	0.444592	2.9387
120	-1.67479	-0.748478	-0.420652	1.40315	0.714767	3.77854	0.613146	3.32223	0.555984	0.619009	-2.48727	0.00341994	-0.381079	0.245747	-1.07142	1.13053	1.91565	0.761669	2.93919	1.41097	2.88838	0.640994	4.33844	0.84961	2.45405	-0.593115	0.193959	-0.585298	1.09194	-0.909704	0.539862	0.307794	1.5849
122	-2.03144	-0.918986	-0.367399	0.56429	0.491494	2.75354	-0.219853	2.40031	-2.47164	-1.23313	-2.48972	-0.389873	-2.01923	0.722584	-2.1531	0.767043	0.89065	0.154386	2.03828	0.664445	1.99822	0.190051	3.4898	0.742615	1.33866	-1.00009	0.0727958	-0.947323	-1.27857	0.0649788	-0.198356	0.675682	1.37188
124	-2.97828	-1.95962	-1.20333	-0.583832	0.0566732	1.60346	-0.504685	1.63522	-3.66324	-2.05147	-2.81901	-1.04308	-2.26351	0.461692	-2.66169	0.307794	-0.260404	-0.891627	1.40413	-0.495891	1.05383	-0.119698	2.6226	-0.229624	-0.127515	-1.65623	-0.129958	-1.89904	-2.18778	0.335154	-1.08119	0.772906	2.17264
126	-3.58263	-2.57912	-2.40373	-1.46373	-0.946346	0.747989	-0.464135	1.26635	-1.56487	-1.09047	-2.90841	-1.65378	-1.38996	0.113347	-2.25863	-0.182722	-1.43833	-2.0036	1.19112	-1.72218	0.247701	-0.797334	1.97184	-1.64694	-1.28443	-1.59662	-0.313169	-2.58254	-0.415278	-0.221807	-1.79449	0.278969	2.39298
128	-3.45707	-2.56349	-2.82829	-1.87364	-1.58929	0.313169	-0.300955	1.25316	0.966377	0.579924	-2.50339	-1.65672	-1.25903	-0.588229	-1.43833	-0.304863	-2.32409	-2.6143	1.24388	-2.52049	-0.223273	-1.19747	1.67284	-2.36269	-1.8155	-1.59125	-0.17002	-2.68416	1.86924	-2.04757	-1.89416	-0.0190539	2.1272
130	-3.27581	-2.67097	-2.8918	-2.12378	-1.95278	-0.00195425	-0.293626	1.43149	1.88878	2.20781	-2.38125	-1.13053	-2.34754	-1.61861	-1.04846	0.282389	-2.92747	-2.91232	1.3582	-3.00808	-0.46902	-1.38556	1.62838	-2.63286	-2.05147	-2.27524	0.625849	-2.78872	3.19715	-3.98032	-1.27271	0.508594	2.44037
132	-3.13755	-2.9006	-3.46049	-2.38809	-2.81901	-0.623406	-0.708416	1.30593	1.52041	3.22256	-3.07599	-1.00106	-3.70575	-1.99724	-1.46715	0.65956	-3.4556	-3.21719	1.25219	-3.52547	-0.837396	-1.93129	1.35381	-3.41994	-2.49216	-2.51707	1.09194	-2.97339	3.74728	-4.39902	-0.347857	1.22141	2.88399
134	-2.91965	-3.17028	-4.03504	-2.88887	-3.49664	-1.40071	-1.35527	0.731867	-0.124584	3.21328	-3.94563	-1.71485	-4.49136	-1.71241	-2.35536	0.382056	-3.88016	-3.55771	0.801731	-4.01843	-1.36065	-2.38614	0.693759	-4.02185	-3.24845	-2.33728	0.502731	-3.11361	3.21035	-3.91827	-0.609726	1.46813	3.16735
136	-3.20595	-3.78196	-4.19236	-3.6393	-3.61536	-2.17899	-2.18339	-0.409416	-2.39835	1.34843	-4.04334	-2.59427	-4.29495	-1.4095	-3.32662	-0.623406	-4.42003	-4.03699	-0.187608	-4.49185	-2.14137	-2.71934	-0.306329	-4.07999	-4.03895	-2.92454	-0.620963	-3.38525	1.18818	-3.49811	-1.70899	1.25707	3.65836
138	-3.56944	-3.7204	-4.16304	-4.01892	-3.9896	-2.91476	-3.1952	-2.00995	-3.16295	-2.3622	-3.68376	-2.60355	-3.10775	-1.30251	-3.89433	-2.3837	-5.29748	-4.37215	-1.58148	-5.02633	-3.16686	-3.56358	-1.49842	-4.27346	-4.51041	-3.66031	-1.83016	-3.28949	-1.08168	-3.49957	-2.03535	0.699622	3.33053
140	-3.23233	-2.49998	-3.98179	-3.73946	-4.6262	-3.26604	-4.18991	-2.99245	-2.28647	-4.53777	-3.2719	-1.89953	-1.99236	-1.26929	-4.16646	-3.56944	-5.92236	-4.26173	-2.43744	-5.26719	-3.84352	-4.67848	-2.20049	-4.31547	-4.49527	-3.56993	-2.68123	-2.57961	-1.7046	-3.4385	-1.59858	0.228647	1.97135
142	-2.86005	-2.08665	-4.08487	-3.78587	-5.21834	-3.74776	-5.29895	-3.58068	-2.47799	-4.35554	-2.96069	-2.09251	-2.94164	-1.9523	-5.21785	-4.08438	-6.30246	-4.3399	-2.97535	-5.44405	-4.38192	-5.65951	-2.77748	-4.40928	-4.74785	-3.94612	-3.67643	-2.46187	-1.6704	-3.17566	-2.29918	0.345414	1.00937
144	-2.64264	-2.63824	-4.3868	-4.08243	-5.4548	-4.34381	-6.16957	-4.421	-4.47719	-4.57685	-2.89473	-2.86591	-4.64281	-2.35487	-6.41727	-4.80892	-6.47248	-4.54754	-3.68865	-5.58232	-4.93106	-6.14319	-3.55869	-4.73319	-5.15824	-4.41074	-4.5622	-2.80484	-2.70224	-3.02127	-3.77854	0.70011	0.862802
146	-2.11792	-2.43255	-3.87723	-3.55185	-4.84654	-3.99156	-6.0997	-4.64525	-5.36002	-4.65991	-2.50144	-2.89229	-4.67603	-1.8111	-6.17494	-5.17192	-5.89939	-4.0365	-3.77219	-5.07421	-4.7288	-5.66879	-3.63686	-4.26906	-4.61887	-3.55087	-4.28127	-2.37099	-3.2167	-2.75842	-3.82838	0.605818	0.816388
148	-1.94057	-1.95962	-3.1268	-2.99587	-4.09806	-3.37499	-5.59209	-4.4298	-4.15083	-3.61194	-2.09056	-2.78578	-4.05654	-2.47017	-5.13235	-5.18854	-5.18951	-3.44046	-3.43606	-4.4982	-4.1992	-4.93741	-3.35887	-3.46293	-3.96811	-2.51707	-3.83864	-1.84677	-2.34803	-2.73742	-2.84099	0.293138	0.807594
150	-2.10766	-1.97868	-2.84734	-3.09798	-3.87674	-3.61243	-5.49242	-4.77179	-2.89131	-2.32605	-1.71974	-2.88887	-4.25147	-4.8656	-4.90957	-5.68931	-4.97796	-3.33297	-3.41066	-4.29007	-4.11077	-4.67994	-3.67595	-3.22549	-4.13861	-2.54395	-4.25294	-1.84726	-1.12516	-2.69003	-2.563	0.157806	1.16327
152	-1.79449	-1.87901	-2.68807	-3.25138	-3.85183	-4.40928	-6.00688	-5.43428	-2.62212	-0.937552	-1.36504	-2.86542	-4.85827	-6.4671	-5.79973	-6.47101	-4.95745	-3.28852	-3.63051	-4.05702	-4.28616	-4.91347	-4.42442	-3.11312	-4.6433	-3.47173	-4.67799	-1.74563	-0.0107483	-2.38614	-3.28998	0.065956	1.42025
154	-1.81159	-2.18339	-3.12827	-3.49371	-4.6775	-5.16753	-7.44765	-6.18667	-3.67448	-0.320497	-1.666	-3.14341	-4.93448	-5.32778	-7.49993	-7.17845	-5.19098	-3.49469	-4.39902	-4.1479	-4.85045	-6.12804	-5.24961	-3.58849	-5.12747	-4.9208	-4.81625	-1.97966	-0.102598	-2.15261	-3.49664	-0.138752	2.01483
156	-2.97437	-3.27972	-4.27737	-4.12347	-6.30197	-6.00248	-9.4019	-7.56344	-5.85933	-1.858	-2.49851	-3.7932	-5.17388	-4.22362	-9.35256	-8.46777	-5.83784	-4.10588	-5.88034	-4.72196	-5.96095	-7.95673	-6.49007	-4.79915	-5.78702	-6.60879	-5.71081	-2.9304	-1.88243	-2.63433	-3.69988	-0.191517	3.30171
158	-3.97788	-3.87479	-4.87879	-4.8099	-7.09198	-7.1335	-10.8099	-9.27585	-8.2357	-4.54803	-3.18836	-4.08829	-5.38836	-5.34536	-10.6492	-10.1479	-6.53941	-4.58174	-7.3773	-5.18414	-7.05436	-9.04085	-8.01096	-5.29406	-6.56286	-7.39391	-7.1037	-3.54159	-4.18601	-3.30464	-5.07275	-0.0957583	3.73702
160	-3.29584	-3.11166	-4.37606	-4.64037	-6.77392	-7.36753	-11.3474	-9.89828	-10.1655	-5.70592	-2.81998	-3.49029	-5.00484	-5.98978	-11.4446	-10.5354	-6.6039	-4.37801	-8.0134	-4.93497	-7.38072	-9.09997	-8.51907	-4.8182	-6.36841	-6.86968	-7.31671	-2.88545	-5.61749	-3.34275	-5.50708	-0.0801243	2.51219
162	-1.90588	-1.96842	-3.57188	-3.57237	-5.8608	-6.0401	-10.9023	-9.11121	-10.3165	-5.09033	-2.02558	-2.51024	-5.03806	-5.02242	-11.3962	-9.45369	-5.76015	-3.57042	-7.61767	-4.0365	-6.7407	-8.33439	-7.56881	-4.1093	-4.93009	-6.14123	-6.40115	-1.79107	-5.41425	-3.57286	-3.96664	0.136798	1.3797
164	-1.80133	-1.83358	-3.36131	-3.03495	-4.9208	-4.73368	-9.95495	-8.37836	-8.64267	-4.93351	-2.31432	-2.26302	-5.57694	-4.45227	-10.3668	-8.81807	-4.89442	-3.15807	-7.15842	-3.42043	-6.00883	-7.2659	-6.55553	-3.6823	-3.91632	-5.53932	-5.74403	-1.70606	-4.71414	-4.09318	-3.33591	0.338085	1.71632
166	-2.78872	-2.70713	-3.75607	-3.73946	-4.91494	-5.35025	-9.81816	-8.69935	-7.79013	-5.79435	-2.99929	-2.64606	-5.84028	-4.45667	-9.75806	-9.25045	-5.02242	-3.64712	-7.48869	-3.72187	-6.12951	-7.17845	-6.8985	-3.887	-4.68092	-5.32142	-5.77139	-2.49949	-5.03904	-4.45032	-4.3697	0.128003	2.99147
168	-3.35252	-3.23331	-3.94905	-4.35798	-5.37908	-6.62149	-10.0512	-8.92018	-7.8512	-5.48607	-3.0115	-2.86395	-4.92422	-3.64028	-9.65937	-9.43512	-5.34634	-3.99595	-7.76961	-4.06973	-6.31956	-7.69095	-7.51996	-4.10881	-5.74989	-5.44699	-5.83393	-2.94603	-5.03659	-3.53719	-4.30131	-0.178814	3.48003
170	-2.85174	-2.53466	-3.55136	-3.78001	-5.01705	-6.07235	-9.19231	-7.91911	-6.56091	-3.52889	-2.83171	-2.78236	-3.21719	-2.25472	-8.67736	-8.70423	-4.68971	-3.41652	-6.94541	-3.54061	-5.50415	-7.11494	-6.77441	-3.73115	-5.08691	-4.85192	-5.66488	-2.38761	-3.4429	-1.87022	-2.98805	-0.328803	2.12622
172	-2.01044	-1.4095	-3.31978	-2.72032	-4.22216	-4.56953	-8.00559	-6.61758	-4.94279	-1.81745	-3.00857	-2.29869	-2.29527	-1.65134	-7.64845	-7.7061	-3.72431	-2.67146	-5.79044	-2.76429	-4.38974	-6.00834	-5.49291	-3.3789	-3.62513	-4.10344	-5.69664	-1.49451	-2.01532	-1.98308	-2.27182	-0.24819	0.388896
174	-1.56682	-1.02305	-3.66959	-2.56886	-4.2119	-4.22656	-7.86048	-6.19204	-4.8099	-1.16376	-3.14292	-1.74221	-2.19609	-2.77406	-7.81309	-7.33284	-3.56406	-2.65436	-5.53395	-2.75305	-4.09806	-5.82709	-5.0918	-3.73506	-3.38281	-4.44836	-6.14905	-1.17206	-1.82332	-2.6612	-2.80386	-0.134355	-0.246724
176	-1.7344	-1.52529	-4.07999	-3.42824	-4.98871	-5.02438	-8.36419	-6.7109	-4.97406	-2.12085	-2.7682	-1.92885	-2.39933	-4.95451	-8.2313	-7.98995	-4.07461	-3.20693	-6.09189	-3.43753	-4.57343	-6.42851	-5.60186	-4.46107	-4.3829	-5.44161	-6.91512	-1.54484	-2.264	-1.86289	-3.78587	-0.062536	0.248678
178	-2.32409	-2.11157	-4.22704	-3.97788	-5.49047	-5.64876	-8.67687	-7.55367	-4.58076	-4.95451	-2.82682	-2.66657	-3.44486	-6.71725	-8.1932	-9.23432	-4.55634	-3.74679	-6.7236	-4.02234	-5.09962	-6.91463	-6.18569	-4.71707	-5.03708	-6.0401	-7.75984	-2.13697	-3.27728	-1.69971	-4.3487	-0.132889	0.755806
180	-2.69247	-2.04805	-4.24024	-3.40577	-5.15873	-5.1387	-8.33732	-7.70219	-4.35212	-7.4882	-3.59778	-3.03202	-4.63353	-6.3093	-7.63575	-9.79373	-4.57734	-3.82007	-6.76415	-4.03308	-5.02242	-6.64103	-5.90672	-4.46546	-4.47572	-5.62482	-7.7276	-2.35048	-4.31938	-3.40675	-4.4552	-0.520319	0.221319
182	-2.72178	-1.66698	-4.1821	-2.56202	-4.42687	-3.93244	-7.29961	-6.56042	-3.88016	-7.0353	-3.68621	-2.75159	-4.85485	-4.65649	-6.58924	-8.75944	-4.12005	-3.53622	-5.96926	-3.67643	-4.2119	-5.75673	-4.69558	-4.18014	-3.55771	-4.91299	-6.7534	-2.18876	-4.00475	-4.73955	-4.55292	-0.660537	-0.281901
184	-3.1483	-1.81648	-4.07754	-2.28501	-3.93146	-2.68807	-5.97512	-4.65307	-2.31676	-4.13226	-3.36717	-2.09887	-4.58858	-3.96078	-5.25987	-6.79933	-3.4898	-3.35643	-4.67017	-3.35789	-3.16882	-4.85436	-3.05107	-3.94221	-2.92258	-4.41856	-5.74745	-2.33533	-2.06076	-4.05214	-4.02478	-0.399156	0.598001
186	-4.20164	-2.58694	-3.95198	-2.21075	-3.62367	-1.59955	-4.82065	-2.92551	-0.238419	-1.53116	-3.48247	-1.60346	-4.59493	-3.38623	-4.28274	-5.08545	-2.97779	-3.38916	-3.4644	-3.09798	-2.33093	-4.1562	-1.56682	-3.63588	-2.28159	-3.74923	-4.71414	-2.94994	0.249167	-2.75403	-2.22149	-0.195425	2.17117
188	-4.8099	-3.12143	-3.96127	-2.34412	-3.38867	-1.39924	-4.11321	-2.07835	1.0123	-0.320986	-3.86648	-1.56975	-5.58623	-3.07159	-3.97495	-4.26417	-2.85223	-3.5709	-2.84197	-3.06475	-1.93324	-3.70135	-1.02354	-3.48296	-2.25618	-3.66666	-4.02771	-3.40382	1.45103	-3.05498	-1.46227	-0.242327	2.66169
190	-4.43419	-2.99684	-3.93098	-2.44574	-3.21035	-1.37677	-3.26653	-1.32352	1.84579	0.93462	-4.14399	-1.88585	-5.75673	-3.50983	-3.20595	-3.68572	-2.5972	-3.45218	-2.24543	-2.94261	-1.45396	-3.09553	-0.732844	-3.58654	-2.36122	-3.50299	-3.69109	-3.3403	2.06125	-3.50006	-2.44281	-0.37717	2.48434
192	-3.96957	-2.81705	-3.90362	-2.33044	-3.52107	-1.09096	-2.80288	-0.324894	3.01639	2.28696	-4.14301	-2.19169	-3.67839	-4.15816	-2.56642	-2.81265	-2.30406	-3.19862	-1.56633	-2.78578	-1.02207	-3.05449	-0.15634	-4.03602	-2.21465	-3.16198	-3.53719	-3.20497	2.87079	-2.7511	-2.93284	-0.343948	2.78823
194	-3.88358	-2.87421	-4.12249	-2.43207	-3.88407	-1.32596	-2.79409	0.223762	4.54656	2.76868	-4.23144	-1.86582	-2.70566	-4.35651	-2.26058	-1.96207	-2.41301	-3.31245	-1.23216	-2.9519	-1.004	-3.49176	0.0942925	-4.30179	-2.60844	-3.70037	-3.7419	-3.27923	3.83522	-2.85125	-2.3964	-0.30926	2.7296
196	-3.73066	-2.82145	-3.79271	-2.14821	-2.7423	-0.918986	-1.31912	1.12223	6.51303	3.50397	-4.05067	-1.2175	-3.32565	-2.96704	-0.455829	-0.544747	-1.87022	-2.98463	-0.348834	-2.49216	-0.323917	-2.25423	0.810525	-3.3403	-2.39493	-3.35252	-3.38672	-3.07452	5.20319	-3.14439	-1.82332	-0.277015	2.45258
198	-3.27874	-2.4775	-2.87861	-1.48425	-1.31472	0.320986	0.164646	2.4692	7.31281	4.64379	-3.33786	-0.992759	-2.66609	-0.592138	0.845702	1.12809	-0.97566	-2.1487	0.701087	-1.49012	0.662491	-0.743592	2.05929	-1.98894	-1.39485	-2.15358	-2.2083	-2.50633	5.86471	-2.07151	-1.59467	-0.105041	2.28403
200	-2.50095	-2.1101	-2.00946	-0.983965	-0.960026	1.23313	-0.0400621	3.44046	6.85258	5.5061	-2.51512	-1.07386	-1.69824	0.761181	0.0210082	2.23615	-0.592626	-1.51601	1.07581	-0.886741	1.01035	-0.877459	3.02567	-1.18916	-0.768509	-2.02314	-1.05872	-1.97721	5.74208	-0.726004	-1.45299	0.0771929	2.2298
202	-1.8541	-1.93178	-0.980545	-0.314146	-0.0659559	2.15994	0.297046	4.34235	7.25125	6.34399	-2.08958	-1.19991	-2.53369	0.679102	-0.187119	3.19276	0.00244284	-0.878924	1.65672	-0.232067	1.53262	-0.479769	4.06826	-0.161226	0.0371308	-2.13795	-0.162691	-1.59565	6.20279	-0.434332	-1.03771	0.157806	3.06085
204	-1.9733	-1.96646	-0.391339	0.426515	1.2048	2.94212	1.55803	4.93253	7.85951	6.32689	-2.06662	-1.24974	-3.50202	-0.0439706	0.911169	3.73115	0.63562	-0.334177	2.38614	0.435309	2.14186	0.869642	4.74248	0.627314	1.0123	-1.75883	0.779257	-1.41341	6.557	-1.23899	-0.485631	0.256007	4.14008
206	-2.8449	-2.328	-1.25121	0.363491	0.553541	2.56105	1.2815	4.42638	6.41092	4.35505	-2.23762	-1.19796	-3.20204	-0.779257	0.872084	3.12143	0.138752	-0.692782	2.01679	0.047879	1.6572	0.521296	4.14985	-0.214968	0.943415	-2.06662	1.41341	-1.71925	5.24081	-2.23957	-0.431889	0.380102	4.21874
208	-4.15669	-3.17077	-2.6783	-0.547679	-1.21017	1.52383	-0.0830557	3.68767	4.20457	2.5073	-2.91867	-1.39924	-3.19422	-0.747989	-0.256984	2.40959	-0.93804	-1.66502	1.21799	-0.983965	0.735287	-1.1105	3.31881	-1.70948	-0.0859871	-3.1737	1.63913	-2.57179	3.85671	-3.00075	-0.962468	0.423584	4.06044
210	-5.53151	-4.14399	-3.24015	-1.32156	-1.39045	1.25561	0.0732844	4.05214	4.66333	3.29291	-4.01599	-1.82967	-4.07461	0.206662	-0.201776	2.73791	-1.11441	-2.13795	1.61323	-1.32889	0.879413	-1.19991	3.57872	-1.89807	-0.73431	-3.39698	1.76371	-3.43362	4.86364	-3.25627	-1.63864	0.599466	5.35611
212	-6.02202	-4.26369	-2.66609	-1.18623	0.187119	2.21026	1.5634	5.3053	7.09295	5.21736	-4.54266	-1.7173	-4.17184	1.46227	1.00497	3.67497	-0.347857	-1.71192	2.87715	-0.78512	1.88243	0.383033	4.83677	-0.585298	-0.179302	-1.92396	1.93764	-3.52498	6.89411	-2.90304	-1.52138	0.898955	6.84281
214	-4.96038	-3.19715	-1.62545	-0.450943	1.48865	3.38037	2.55323	6.47981	8.86692	6.65764	-3.68963	-0.768998	-3.10677	2.20244	1.70802	4.56806	0.294115	-1.03868	3.88261	-0.169043	2.63384	1.62643	5.98343	0.676171	0.861825	-0.264801	2.35438	-2.70908	8.03441	-2.74133	0.205685	0.936575	6.0958
216	-3.59436	-2.03975	-1.40413	-0.30242	0.768509	3.37695	2.38223	6.66986	9.15029	7.54536	-2.14381	0.101621	-2.61576	1.60493	1.33817	4.84996	-0.0654675	-1.01621	4.0194	-0.483189	2.42034	1.30202	5.9204	-0.0830556	0.864267	-0.200799	2.27866	-1.88341	8.17659	-2.862	1.57513	0.545725	3.93098
218	-3.64663	-2.08372	-2.22247	-1.03087	-0.606306	2.392	1.89758	6.06893	8.1077	8.0349	-1.84823	-0.21741	-2.95336	0.527648	0.624383	4.55389	-0.916055	-1.72365	3.51863	-1.46471	1.70997	0.493937	5.03513	-1.83748	-0.158783	-1.27857	1.4525	-2.00995	7.83996	-3.28656	0.790006	0.16318	3.01199
220	-4.33355	-2.64752	-2.63335	-1.34599	-0.268221	2.03242	2.32654	5.87936	7.63575	8.75553	-3.16882	-1.08949	-2.61234	0.449966	0.876481	4.34967	-0.994225	-2.09642	3.62025	-1.74515	1.73195	0.846679	4.74345	-1.75834	-0.605818	-1.5292	0.844236	-2.49118	8.42038	-4.17281	-0.398179	0.460715	3.54257
222	-3.93098	-2.37344	-1.91517	-0.742127	0.850099	2.6656	3.54696	6.34887	9.41558	9.81669	-3.77024	-1.42758	-0.845702	0.654674	2.42229	4.29691	-0.356651	-1.67284	4.62767	-1.25658	2.51072	1.83797	5.29504	-0.419187	-0.0478791	-0.431401	0.623895	-2.24983	10.3522	-3.47515	-0.612169	0.910681	3.866
224	-2.97877	-1.88487	-1.22238	-0.0640017	1.06262	3.34079	4.53972	6.97374	12.2356	11.0757	-2.71006	-1.14275	0.862802	0.0674216	3.99547	4.43224	-0.00683985	-1.28443	5.61505	-1.04943	3.1781	2.16873	5.94434	-0.0200311	0.552564	0.4998	0.584809	-1.77935	12.4212	-0.872084	-0.29216	0.830557	3.65836
226	-2.64264	-1.86289	-1.24779	0.0679102	0.867199	3.6779	4.93595	7.45693	13.82	11.9659	-1.83211	-0.410881	0.610215	-0.788052	4.5495	4.87195	-0.126049	-1.431	6.12316	-1.31863	3.41505	2.10033	6.3176	-0.337597	0.719653	0.355674	1.03917	-1.70948	13.3876	0.193959	-0.00781697	0.599955	3.2592
228	-2.85223	-2.19169	-1.7046	-0.578458	0.785609	3.10286	4.77326	7.26981	13.5141	11.6244	-2.10912	-0.321474	-0.624872	-1.22483	4.10832	4.93448	-0.500777	-1.97966	5.97121	-1.89416	3.16637	2.07883	5.90721	-0.648323	0.0146569	-0.0933155	1.37384	-1.99822	13.0275	-0.893581	-0.342971	0.396224	2.75794
230	-3.23282	-2.74621	-2.29918	-1.57561	0.552076	1.74905	4.41612	6.41776	12.3137	10.4318	-2.59476	-1.2219	-0.657117	-0.669331	3.39209	4.20799	-0.918986	-2.56984	5.43575	-2.44232	2.73742	1.96451	4.91738	-0.94146	-1.21701	-0.0635131	1.02452	-2.46089	12.1706	-1.16327	-0.905795	0.289229	2.67195
232	-3.68523	-3.45316	-2.44232	-2.20879	0.162203	0.775349	3.97201	5.55887	11.2467	9.47567	-2.51414	-2.0119	-0.465112	0.0830556	2.734	3.16491	-1.19356	-2.88203	4.9936	-2.62456	2.43988	1.59955	4.10002	-1.04162	-1.95718	-0.0644903	0.1666	-2.87128	11.6776	-0.259915	-1.13053	0.393293	3.7976
234	-3.82349	-3.7419	-2.07395	-2.30699	-0.117744	0.356651	3.31245	4.90517	10.6214	8.93972	-2.97486	-2.2982	-1.34452	-0.340528	2.00555	2.49216	-1.37872	-2.89913	4.61105	-2.64361	2.13942	1.10317	3.50251	-1.01572	-2.09789	-0.512502	-0.694248	-2.93382	11.2555	-0.438729	-1.55509	0.277015	4.97113
236	-3.56064	-3.24601	-1.70069	-2.02265	0.136798	0.25503	2.99587	4.33941	10.485	7.5351	-3.75509	-2.40666	-1.48425	-0.890161	1.82234	2.22931	-1.39338	-2.72765	4.27639	-2.57619	1.94155	1.10171	3.097	-0.830556	-1.93959	-0.816388	-0.664445	-2.6187	10.2388	-1.68066	-2.17362	-0.0473906	4.89882
238	-3.41066	-2.74328	-1.56389	-1.88097	0.13924	-0.0488563	2.77162	3.26555	10.3478	4.80257	-3.2123	-2.49998	-0.735287	-1.75931	1.89123	1.3411	-1.64499	-2.70468	3.64175	-2.65143	1.49549	1.02794	2.40471	-0.724538	-1.94839	-0.879901	-0.780235	-2.42865	8.80292	-1.79889	-2.65925	-0.254053	4.12591
240	-3.31392	-2.63873	-1.70899	-2.26058	-0.860359	-0.936575	1.70997	1.72267	8.98516	2.89767	-2.58401	-2.61234	-0.641971	-3.18396	0.876481	-0.161226	-2.46236	-3.03349	2.44037	-3.15074	0.524228	0.0332222	1.17011	-1.14226	-2.48532	-1.15399	-1.6489	-2.48532	7.48576	-1.367	-2.81901	-0.314634	3.26213
242	-2.71494	-2.38321	-1.88439	-2.59524	-1.46227	-1.72853	0.821274	0.892115	7.43837	3.58849	-2.55225	-2.43695	-0.715744	-3.51472	-0.192005	-0.896024	-3.07257	-3.25822	1.62447	-3.52547	-0.105041	-0.65272	0.323428	-1.47741	-3.06524	-1.07826	-1.94497	-2.31383	7.26786	-2.25569	-2.38956	-0.412835	2.41545
244	-1.95865	-1.75199	-2.30944	-2.48678	-1.28003	-2.13551	0.913124	0.733821	7.19409	5.13919	-2.59378	-1.7129	-0.551587	-3.11117	0.102598	-0.987874	-3.17859	-3.24992	1.53067	-3.57774	-0.204219	-0.501265	0.0278481	-1.60444	-3.35594	-0.382056	-1.90784	-1.86826	7.83215	-3.01199	-2.05978	-0.592138	1.56242
246	-2.15505	-1.63229	-3.21816	-2.63238	-2.00066	-2.41252	0.483188	0.3161	6.57361	5.14701	-3.10237	-1.56584	-0.945857	-2.57375	0.151454	-1.3284	-3.53231	-3.5753	1.00595	-3.93977	-0.714279	-1.12516	-0.42505	-2.50633	-3.57237	-0.843259	-2.15652	-1.83651	7.26102	-2.23078	-2.26351	-0.57113	1.69043
248	-2.96997	-2.14186	-3.41408	-3.04472	-3.08674	-2.39445	-0.721607	-0.313657	4.26076	3.54794	-3.46831	-2.2894	-1.72218	-1.65672	-0.866222	-1.74857	-4.06826	-3.93684	0.0136798	-4.32915	-1.49305	-2.23713	-0.864267	-3.16589	-3.54159	-2.36073	-2.16384	-2.20879	5.24667	-1.0807	-2.62407	-0.357628	2.84001
250	-3.8914	-2.97926	-2.88496	-3.27679	-2.93724	-2.4692	-1.25121	-0.808083	2.09154	1.8028	-3.4004	-2.85711	-2.48092	-0.87697	-1.5932	-1.98063	-4.34186	-4.0238	-0.606795	-4.32769	-1.90735	-2.3026	-1.22092	-2.52733	-3.49664	-3.10579	-1.91175	-2.84588	3.55674	-0.443615	-2.7511	-0.0884298	4.29984
252	-4.73662	-3.75998	-2.99684	-3.35985	-2.58352	-2.94408	-1.15692	-0.946834	2.43842	1.99431	-3.04033	-2.90304	-2.969	-1.01865	-1.74954	-2.00604	-4.61887	-4.25929	-0.757272	-4.46839	-2.06515	-2.04415	-1.50722	-2.27133	-3.83913	-3.05547	-1.97282	-3.58068	4.07706	-0.163668	-2.3964	-0.0112369	5.27403
254	-4.5534	-3.33786	-3.50348	-3.00759	-2.83024	-2.83611	-1.06751	-0.638551	4.93546	3.84939	-2.38858	-1.9562	-2.97437	-2.02363	-1.72121	-1.82087	-4.82798	-4.3526	-0.541816	-4.66773	-2.09447	-2.16384	-1.25316	-3.01981	-3.80932	-2.27866	-2.52929	-3.48687	6.22917	-0.502731	-2.38565	-0.285809	4.42394
256	-3.76389	-2.46871	-3.83815	-2.64166	-3.10775	-2.26449	-1.21017	-0.76802	6.2238	4.21581	-2.50242	-1.01621	-2.89131	-2.85565	-1.6743	-2.1531	-5.00142	-4.30815	-0.65614	-4.80404	-2.28647	-2.36709	-0.988362	-3.61292	-3.36962	-1.23997	-3.75265	-2.97095	6.79249	-1.99431	-2.8493	-0.604352	2.45063
258	-3.76633	-2.56886	-4.12151	-2.86542	-3.28412	-2.30992	-1.96793	-1.83944	4.43419	2.19462	-3.51619	-1.40169	-3.19471	-2.6827	-2.39493	-3.28021	-5.43428	-4.59444	-1.62838	-5.1304	-2.89278	-2.79946	-1.52041	-3.68279	-3.34568	-1.63375	-5.19782	-3.13657	4.62376	-3.1566	-2.31725	-0.530091	1.45934
260	-4.47621	-3.12436	-4.32671	-3.32662	-3.18494	-2.97437	-2.70224	-2.87275	2.1443	0.345902	-4.11956	-1.93862	-3.83766	-2.3622	-3.18445	-4.14252	-5.84809	-4.9037	-2.56105	-5.489	-3.41603	-3.1224	-2.38516	-3.50788	-3.86307	-2.99245	-5.68589	-3.63735	2.59231	-3.22305	-1.24925	-0.0532533	2.13746
262	-5.04929	-3.53622	-4.34821	-3.71894	-2.6612	-3.54159	-2.37637	-2.8576	1.76615	0.921918	-4.16549	-2.08421	-3.22793	-2.74572	-2.52147	-3.6139	-5.81683	-5.00435	-2.65338	-5.59697	-3.30171	-2.77406	-2.68221	-3.19667	-4.43224	-3.11263	-4.65258	-3.93928	2.84246	-3.35105	-1.50868	0.116278	3.31539
264	-5.56571	-4.07803	-4.43859	-4.03308	-2.77113	-3.46	-1.87852	-1.99236	2.38858	3.46489	-4.17623	-2.59476	-2.14235	-2.86151	-1.75443	-1.96158	-5.6302	-5.13186	-2.28208	-5.60137	-3.00319	-2.61918	-2.20146	-3.19325	-4.57686	-2.72813	-2.88838	-4.35993	4.35944	-3.10384	-2.55958	-0.170997	4.20262
266	-6.25946	-4.63353	-5.09375	-4.29642	-3.83815	-3.18543	-2.38858	-1.47204	2.43158	4.98383	-4.63841	-3.00857	-3.21181	-2.31383	-2.63286	-0.711836	-5.895	-5.52467	-2.22882	-5.86861	-3.24503	-3.3618	-1.75931	-3.98765	-4.56757	-3.36278	-1.9137	-4.86218	4.99946	-3.13901	-2.49851	-0.343948	4.07168
268	-6.70601	-4.79671	-6.10361	-4.66089	-4.89784	-3.43899	-3.32076	-1.92738	1.55461	3.49518	-5.13919	-2.91037	-5.2584	-2.32751	-3.8958	-0.911658	-6.52133	-6.07772	-2.76722	-6.41874	-3.91583	-4.2588	-2.07541	-5.33364	-4.90126	-3.59387	-2.45258	-5.09717	3.96029	-4.01403	-2.15603	-0.281412	2.89278
270	-6.15491	-4.41025	-6.64543	-5.0322	-5.60919	-4.06728	-4.00279	-2.97877	0.506639	0.28874	-4.86071	-2.87812	-6.22673	-3.30073	-4.34821	-2.11352	-7.1335	-6.51303	-3.64761	-6.97081	-4.58858	-4.8954	-2.8024	-6.35718	-5.50952	-3.12387	-3.72431	-4.98529	2.28305	-3.88505	-2.89718	-0.242327	1.60346
272	-5.00972	-3.8318	-6.24236	-4.80599	-5.30677	-4.05605	-3.9344	-3.39991	0.517877	-1.70362	-4.81234	-2.78383	-5.95118	-3.62758	-4.05849	-2.71543	-7.23219	-6.43193	-3.98227	-7.00843	-4.67554	-4.76446	-2.87373	-5.98636	-5.57157	-3.07257	-3.93977	-4.6135	1.43051	-3.78245	-3.15807	-0.255518	0.940483
274	-4.78743	-3.85232	-5.58476	-4.22216	-4.17184	-3.1908	-2.89473	-2.3666	2.42083	-0.405996	-5.24765	-2.23664	-5.15678	-2.80337	-3.06622	-1.72853	-6.65569	-6.01518	-3.14439	-6.51743	-3.92609	-3.63881	-1.83455	-4.99946	-4.92618	-3.31978	-2.80582	-4.50113	2.6441	-4.4425	-2.58694	-0.104552	1.68408
276	-5.31849	-4.20262	-5.254	-3.93928	-3.37792	-2.21807	-1.53213	-0.627314	5.28136	3.35643	-4.59835	-1.87071	-4.85436	-2.09398	-1.79693	-0.00928275	-5.93946	-5.69957	-1.75296	-6.00199	-2.97877	-2.50877	-0.48612	-4.57392	-4.24463	-3.68718	-2.0847	-4.62767	5.49877	-4.0238	-2.29673	0.111881	2.98268
278	-5.11623	-3.7717	-5.06688	-3.5626	-3.0242	-1.35918	-0.45192	0.65614	7.08318	6.06697	-3.29487	-2.12183	-4.69313	-1.89171	-0.603375	1.06409	-5.38298	-5.39178	-0.682522	-5.54323	-2.28745	-1.82918	0.405507	-4.50308	-3.52303	-3.31734	-2.26058	-4.22069	7.38609	-2.90597	-2.32556	0.08159	3.05743
280	-4.20994	-2.59036	-5.01412	-3.00466	-2.7936	-1.05481	-0.0532534	0.773883	6.99915	5.2711	-3.52987	-2.25667	-4.41807	-1.49256	0.00439703	0.918009	-5.08594	-5.00679	-0.381079	-5.20319	-2.05392	-1.59174	0.480257	-4.40586	-2.98756	-1.69727	-2.03584	-3.41554	6.8985	-2.81363	-2.04463	0.050322	1.66356
282	-4.122	-2.23859	-5.04588	-2.99538	-2.66853	-1.78032	-0.671774	-0.0801243	5.20368	2.83317	-5.33071	-2.21026	-4.94181	-1.29371	-0.857916	0.00977125	-5.23886	-4.98187	-0.902375	-5.20759	-2.37148	-1.87217	-0.25161	-4.08732	-3.33004	-1.13737	-1.35039	-3.38525	5.23006	-4.72538	-1.76664	0.345902	1.03038
284	-4.62229	-3.06182	-5.08985	-3.41701	-2.85711	-2.41399	-1.50722	-0.530579	3.17321	2.08812	-5.93017	-2.42376	-5.44796	-1.81403	-2.16922	-0.553053	-5.44015	-5.21785	-1.36016	-5.24912	-2.6143	-2.26351	-0.633177	-3.97641	-3.93977	-2.47408	-1.18672	-4.01159	4.21141	-5.92675	-2.38663	0.38743	2.08665
286	-4.30961	-3.57774	-5.03952	-3.41261	-3.3789	-2.136	-1.72609	-0.0293137	2.78334	2.75891	-4.8099	-2.39151	-4.48891	-2.0974	-2.2425	-0.568198	-5.19	-5.03855	-1.07875	-4.94719	-2.37051	-2.53808	-0.103575	-4.22607	-3.81323	-3.17077	-1.27759	-4.03553	4.20946	-4.53044	-2.65143	-0.0517876	2.8918
288	-3.98814	-3.36717	-4.86218	-3.05449	-3.73408	-1.69482	-1.79303	0.374239	2.91476	2.42229	-4.40097	-2.17215	-2.68661	-2.21954	-1.72902	-0.848633	-4.85876	-4.63451	-0.791472	-4.61936	-2.11303	-2.90597	0.308772	-4.27004	-3.44974	-2.53857	-1.46422	-3.64272	3.84059	-3.25138	-1.96353	-0.225227	3.04423
290	-4.95793	-3.13901	-4.62669	-2.77894	-3.68083	-1.12223	-2.07688	0.637574	2.17166	1.69238	-5.11672	-2.35683	-2.21417	-2.29673	-1.9479	-0.937552	-4.60519	-4.46791	-0.749944	-4.357	-2.01337	-3.20399	0.713302	-3.97543	-3.13462	-2.136	-1.51308	-3.68083	3.05156	-3.27337	-1.81696	-0.0122141	3.6906
292	-6.01225	-3.14341	-4.43077	-2.64557	-3.45316	-0.498823	-2.28403	1.19698	1.41879	2.09398	-5.8779	-2.53417	-4.31108	-2.26009	-2.82585	-0.296069	-4.26369	-4.40146	-0.58139	-3.99009	-1.82234	-3.1268	1.42758	-3.66569	-2.76184	-2.98268	-1.06702	-3.89726	2.89034	-4.07706	-2.30748	0.203731	4.75811
294	-6.17788	-3.60315	-4.37606	-2.91476	-3.40528	-0.61852	-2.53124	1.35967	0.606306	2.09984	-6.2795	-2.38125	-6.37379	-2.50584	-3.85671	-0.0918498	-4.06484	-4.35456	-0.648811	-3.79711	-1.72951	-2.97584	1.60688	-3.69011	-2.88887	-4.36677	-0.931689	-4.08341	2.44965	-4.82309	-2.74719	0.334177	5.97561
296	-5.90965	-4.16597	-4.36482	-3.42678	-3.54452	-1.27075	-3.15758	0.792937	-1.19502	0.512502	-5.89255	-2.03193	-5.95362	-2.38028	-4.827	-0.860847	-4.00182	-4.31889	-1.1618	-3.75314	-1.8409	-3.17663	1.04504	-3.83571	-3.46977	-5.11281	-1.30349	-4.16549	0.715256	-4.57197	-2.93089	0.416255	6.54674
298	-5.62775	-4.05116	-4.31938	-3.5499	-3.41896	-1.70166	-3.54599	0.309749	-2.64459	-0.84961	-5.03317	-1.59613	-5.49144	-1.367	-5.2286	-1.4481	-3.78978	-4.12787	-1.39289	-3.55478	-1.79254	-3.31099	0.542793	-3.84645	-3.82203	-5.2755	-1.46911	-3.91681	-0.592138	-3.90997	-2.07151	0.576015	5.95851
300	-5.49877	-3.48589	-3.99889	-2.9348	-2.52733	-1.08412	-2.7296	0.924361	-2.01825	-0.10211	-4.4469	-1.21408	-6.51205	-0.046902	-4.35456	-0.784143	-3.03495	-3.53133	-0.599466	-2.90744	-1.05627	-2.33435	1.22483	-3.50935	-3.27874	-4.95256	-1.01328	-3.4004	0.101621	-3.59826	-0.806617	0.808571	5.69908
302	-5.17046	-2.99831	-3.14341	-2.07248	-1.05041	0.162691	-1.51259	1.87266	-1.0123	0.757761	-4.39022	-1.068	-7.14621	0.146569	-3.19813	-0.0048856	-1.97526	-2.66413	0.470974	-1.92298	0.0112368	-0.704996	2.43988	-2.52343	-2.24983	-4.85094	-0.608261	-2.77943	0.810037	-3.67497	-0.562336	0.763623	5.89011
304	-4.4083	-2.63384	-2.25081	-1.5634	-0.118232	0.723561	-1.46667	1.63913	-2.03535	-0.909215	-4.43615	-1.29127	-7.10859	-1.1745	-3.48883	-0.719653	-1.42514	-2.02167	0.47244	-1.25267	0.40453	-0.232067	2.66755	-1.46373	-1.60151	-5.38738	-1.14079	-2.32067	-0.669331	-4.01989	-1.23167	0.600443	5.79191
306	-3.91436	-2.63286	-2.19462	-1.71583	-0.853519	0.199334	-2.68367	0.602398	-4.68238	-2.93919	-3.96175	-1.965	-6.46075	-2.10375	-4.96087	-2.02656	-1.67528	-2.07102	-0.416744	-1.35576	-0.161714	-1.49891	1.89171	-1.58245	-1.84335	-5.52271	-2.00653	-2.40031	-2.76282	-4.12738	-1.95474	0.792449	6.05818
308	-4.26222	-3.25578	-2.78823	-2.34901	-2.5459	-0.727958	-3.84206	0.332223	-6.34154	-2.03193	-3.4043	-2.54297	-5.27648	-1.71827	-5.90868	-2.09593	-2.14528	-2.56251	-0.905307	-1.80817	-0.726981	-3.13218	1.28199	-2.56886	-2.70713	-5.29651	-2.15554	-2.91574	-2.84001	-3.41261	-1.96207	1.3157	7.53119
310	-4.41172	-3.17468	-2.77894	-2.27914	-2.9646	-0.865733	-3.52009	1.34892	-5.21443	1.01426	-3.26653	-2.12671	-4.09513	-0.816388	-5.28674	-0.870619	-1.83406	-2.43597	-0.171486	-1.62252	-0.22083	-3.20106	1.67919	-2.67293	-2.83806	-5.10206	-1.58734	-2.70419	-0.864756	-2.39103	-1.05627	1.61568	8.64072
312	-3.49518	-2.02607	-1.96744	-1.34746	-2.03584	-0.159271	-2.45014	2.47701	-2.62993	3.05303	-3.15758	-1.16913	-3.10482	-0.320497	-4.05409	0.158783	-1.01132	-1.68066	0.927781	-0.974682	0.729424	-2.1228	2.44868	-1.76957	-1.97575	-4.20017	-0.949277	-1.73098	1.22434	-1.67137	0.361048	1.13835	7.95869
314	-2.59231	-1.60737	-1.44077	-0.894558	-1.57708	0.532045	-2.26693	2.55665	-0.596535	2.82438	-3.0159	-1.08852	-2.94261	-0.994225	-3.63686	-0.155851	-0.860847	-1.36504	1.16376	-0.81932	0.922406	-1.76762	2.66267	-1.24925	-1.19307	-3.26604	-0.824694	-1.39533	2.04366	-1.38117	-0.178814	0.491005	7.27079
316	-2.44819	-1.79009	-1.72609	-1.14666	-1.66209	0.364468	-2.41155	1.80084	0.514945	1.38801	-3.40088	-1.38703	-3.21132	-1.57415	-3.40088	-1.27417	-1.33866	-1.60884	0.854008	-1.16962	0.48954	-1.91126	2.20146	-1.48914	-1.2429	-3.62953	-1.16864	-1.66502	1.73733	-2.0075	-2.31432	0.551099	7.27665
318	-2.57228	-1.66111	-2.14772	-1.26587	-1.56389	-0.438729	-2.08616	1.12907	0.783654	0.456317	-3.60559	-0.773883	-3.51716	-0.884787	-2.59231	-1.9435	-1.68359	-1.76176	0.697179	-1.39436	0.272618	-1.75052	1.60395	-1.74075	-1.87803	-4.49673	-1.43247	-1.70704	1.30691	-2.91574	-2.25814	0.906772	7.47061
320	-2.64312	-1.46325	-1.99236	-0.874527	-1.09145	-0.47928	-1.73586	1.11001	0.134355	0.801243	-3.28803	-0.0747501	-3.93195	0.0473907	-1.96207	-1.81354	-1.52138	-1.51064	0.874039	-1.1618	0.637086	-1.36114	1.63668	-1.34648	-1.88781	-4.3912	-1.28003	-1.52969	1.36504	-3.18494	-0.694736	0.728936	8.06275
322	-2.71739	-1.41634	-1.40071	-0.306817	-0.219365	0.315123	-1.61665	1.3582	-0.939506	1.40999	-3.54648	-0.109927	-3.95785	0.130935	-2.05929	-1.57757	-1.01816	-1.00448	1.10415	-0.661514	1.18281	-0.762158	2.05636	-0.427492	-1.14275	-3.45365	-1.0465	-1.38459	1.52676	-2.8063	-0.0830557	0.250633	9.03939
324	-2.49509	-1.03624	-0.900909	0.194936	0.204219	1.0211	-1.70362	1.39729	-1.43198	1.10562	-3.50299	-0.488074	-3.50104	-0.422118	-2.42425	-1.70264	-0.654674	-0.474883	1.15936	-0.317077	1.48767	-0.454852	2.25618	-0.0131912	-0.424561	-2.83855	-1.0724	-0.893093	1.27222	-1.13298	-0.363491	0.0039085	9.52013
326	-2.00897	-0.0801242	-0.513968	0.801731	0.118721	1.43344	-1.48034	1.66698	-0.209593	0.93804	-2.74377	-0.606795	-2.93675	-0.268221	-2.06711	-1.61763	-0.402576	0.070353	1.47448	0.0410392	1.80182	-0.381079	2.51317	-0.0283365	0.204708	-2.27035	-1.1105	-0.0102598	1.63033	-0.0175882	-0.278481	-0.00537419	8.9832
328	-2.23908	0.303886	-0.38743	1.08021	0.482211	1.47546	-0.689362	2.49704	2.18192	2.52196	-2.93284	0.243793	-2.81363	1.07923	-0.898955	-0.825671	-0.0302908	0.442638	2.32165	0.480257	2.38761	0.098201	2.96167	0.293138	0.42163	-1.37872	-0.844236	0.257961	3.27142	-1.48572	0.893581	0.116278	9.291
330	-3.23282	-0.585787	-0.987385	0.484654	0.319031	0.998133	-0.578458	2.74963	2.85174	3.63539	-3.79613	0.991294	-2.98072	1.68456	-0.55403	-0.374728	-0.155363	0.0894071	2.54541	0.250633	2.36415	0.0688873	2.8405	0.0312679	-0.200311	-1.46715	-0.792449	-0.603375	3.81763	-2.67732	1.34746	0.214479	11.0137
332	-4.02185	-1.75883	-1.89318	-0.363002	-0.806128	0.437752	-1.64011	1.63766	0.773395	1.61372	-4.05751	0.195914	-2.85516	0.320009	-1.53506	-1.35674	-1.00986	-0.732844	1.52822	-0.678125	1.35723	-0.955629	1.99578	-0.960514	-0.914589	-2.19267	-1.44712	-1.70118	1.82918	-2.38223	0.297046	0.203731	12.2082
334	-4.30424	-2.07151	-2.20293	-0.617055	-1.47986	0.220342	-2.60648	0.280435	-1.39778	-1.33573	-3.44192	-0.918009	-3.02274	-1.29665	-2.49069	-2.89669	-1.69238	-1.17353	0.448501	-1.36456	0.445081	-1.79644	1.27466	-1.50819	-1.01132	-2.31432	-2.15798	-2.10717	-0.236953	-2.45307	-0.435309	0.299977	12.7608
336	-4.20213	-1.62789	-1.83064	-0.325871	-1.07826	0.276038	-2.56447	0.0337107	-0.878924	-1.91956	-2.85272	-0.93462	-3.04619	-1.83944	-2.6187	-3.59436	-1.54874	-0.998134	0.430912	-1.21066	0.537907	-1.56535	1.27613	-1.12027	-0.828114	-2.1018	-2.14235	-1.83406	0.362025	-3.27679	-0.396713	0.604841	13.6656
338	-3.91632	-1.367	-1.5805	-0.00781703	-0.623406	0.56087	-1.98796	0.901887	1.58099	0.115301	-3.17321	-0.573573	-2.50046	-1.74417	-2.36318	-2.97095	-1.00937	-0.743104	1.18183	-0.718187	1.17108	-0.983477	1.83602	-0.764601	-0.693759	-1.94155	-1.4867	-1.49158	2.96069	-3.40137	-0.538396	0.744081	14.7189
340	-3.88554	-1.68994	-1.85068	0.0283366	-0.919964	0.983965	-1.92201	1.77641	2.53466	2.14577	-3.90166	-1.0167	-2.35878	-1.28248	-2.39542	-2.02656	-0.683988	-0.736264	1.70215	-0.49296	1.51894	-1.09927	2.45698	-1.15838	-0.502731	-1.60786	-1.22434	-1.53164	4.31547	-2.15114	-1.14519	0.518365	15.697
342	-3.86453	-1.90588	-2.03437	-0.105529	-1.13542	1.15496	-2.37393	1.83162	0.459738	1.57952	-4.28909	-1.61617	-3.12778	-0.148523	-2.78139	-1.82332	-0.582855	-0.780723	1.51503	-0.417232	1.46031	-1.40608	2.66364	-1.23899	-0.465112	-1.01328	-1.41488	-1.54826	2.6099	-1.56975	-1.44859	0.179303	16.1685
344	-3.64224	-1.76078	-1.94546	-0.145592	-0.73431	1.04357	-2.83122	1.21164	-2.55909	-1.03771	-4.6775	-1.25903	-4.84068	1.00693	-3.37401	-2.22101	-0.612658	-0.748478	0.909704	-0.366422	1.22629	-1.2517	2.39347	-0.754341	-0.640506	-1.18281	-1.63815	-1.37921	-0.450455	-2.68172	-0.762646	0.0381079	15.9828
346	-3.45951	-1.559	-1.80084	0.0249167	-0.422118	1.16473	-3.00271	0.675194	-3.58556	-2.90157	-4.67554	-0.520319	-6.05573	1.23118	-3.73897	-2.62847	-0.534976	-0.646368	0.590672	-0.247213	1.20626	-0.97224	2.2083	-0.582855	-0.537907	-2.50437	-2.10961	-1.24877	-1.80084	-3.38867	0.0732844	0.254541	16.1069
348	-3.15953	-1.13493	-1.53213	0.339063	-0.630246	1.69678	-2.82145	0.901887	-2.51512	-2.20635	-3.61097	-0.143149	-5.21785	0.186631	-3.48638	-2.32067	-0.162203	-0.416255	0.897001	0.0727957	1.54386	-0.983965	2.58743	-0.824694	-0.0869642	-3.15074	-2.01141	-0.933643	-0.678125	-2.36953	-0.248678	0.469509	16.8232
350	-2.69442	-0.379125	-1.31521	0.692782	-1.0592	2.45698	-2.77064	1.64352	-1.45738	0.220342	-2.30992	0.0195425	-3.41359	-1.50819	-3.26555	-1.44028	0.259427	-0.0698644	1.42856	0.441661	1.95132	-1.3924	3.34275	-1.01816	0.56429	-2.50877	-1.06898	-0.354208	1.20382	-0.871596	-0.998134	0.378636	17.5106
352	-2.39347	0.229136	-1.34257	1.00937	-1.14861	3.14048	-2.81168	2.13209	-0.806617	1.9694	-2.00213	0.197868	-2.36415	-2.01141	-3.22354	-0.881367	0.437264	0.162691	1.70899	0.65614	2.13502	-1.63424	3.87968	-0.924849	1.29176	-1.90246	-0.361536	0.0732844	2.23957	-0.546702	-1.14568	0.247213	18.0099
354	-3.06524	-0.313169	-1.79596	0.866222	-0.806617	3.02323	-2.51854	1.91175	-0.268221	1.97966	-3.58947	0.264801	-2.88985	-0.875016	-2.90402	-0.983477	0.321963	-0.135332	1.6489	0.468531	2.01825	-1.26929	3.68279	-0.759226	1.23655	-2.08079	-0.422607	-0.514945	2.24837	-2.64312	-1.29078	0.239396	19.3881
356	-4.58858	-2.05099	-2.68709	-0.0004885	-0.990317	1.98454	-2.68758	1.15643	-0.834465	1.36846	-5.62433	-0.18028	-3.78196	0.273595	-3.08674	-1.45103	-0.243793	-0.956606	1.14666	-0.247213	1.41537	-1.37677	2.90646	-1.18037	-0.054719	-3.01785	-0.871107	-2.03437	1.72853	-4.85778	-1.58001	0.244281	22.0943
358	-5.03317	-3.23233	-3.32613	-0.622429	-2.10864	1.07044	-3.69451	0.431401	-2.72276	1.53067	-5.6683	-0.747501	-3.90557	0.429935	-4.25831	-1.68896	-1.11246	-1.60542	0.295092	-1.00644	0.545236	-2.43402	2.12427	-2.21172	-1.13493	-4.14985	-1.07435	-2.87079	1.0509	-3.95785	-1.06116	0.184188	24.1306
360	-4.08976	-3.03251	-3.28754	-0.623406	-2.91672	0.683499	-4.44787	0.235487	-3.93195	3.01345	-4.55731	-0.793426	-4.65551	-0.190051	-5.41963	-1.39192	-1.78081	-1.80084	-0.236464	-1.38556	-0.0180768	-3.18983	1.75247	-2.82389	-1.32596	-5.11379	-0.885276	-2.53417	1.05969	-2.39591	-0.274084	0.0498334	24.243
362	-3.35203	-2.42425	-2.88496	-0.584321	-2.71983	0.46902	-4.32915	0.390362	-2.90109	4.46204	-4.1308	-0.619009	-5.28087	-0.960514	-5.61163	-1.10757	-2.03877	-1.7813	-0.17002	-1.49793	-0.100644	-3.0711	1.7427	-2.54981	-1.38752	-5.54763	-0.683011	-1.97037	2.08567	-1.8751	-0.393293	-0.0200311	23.92
364	-3.09456	-1.88487	-2.33191	-0.215456	-2.00457	0.638551	-3.84108	0.374728	-0.580412	3.60755	-4.25636	-0.18028	-4.02038	-1.31521	-4.97113	-1.48816	-1.92103	-1.44126	0.00635138	-1.30935	0.0488562	-2.61381	1.88243	-1.90686	-1.15496	-4.74297	-0.755806	-1.46813	3.10335	-1.56145	-0.561847	0.109438	24.496
366	-2.80777	-1.24535	-1.90735	0.39085	-1.38068	1.22141	-3.5924	0.0649789	1.36162	1.03722	-4.7459	0.436287	-3.28558	-1.64206	-4.4254	-2.28305	-1.73195	-0.921918	-0.0185654	-0.972728	0.123606	-2.35536	2.01825	-1.31081	-0.532533	-3.62123	-1.13151	-0.956606	3.31881	-2.76331	-0.0605817	0.252587	25.6779
368	-2.72129	-0.77828	-1.9181	0.499311	-1.4608	1.54142	-3.9383	-0.352254	1.31375	-0.869641	-5.10108	0.511037	-4.38534	-2.22003	-4.7288	-2.80288	-1.92689	-0.865244	-0.303886	-0.908727	-0.106995	-2.61723	1.95523	-1.2219	-0.256984	-3.3105	-1.64743	-0.670308	2.4433	-4.42394	-0.788052	0.272618	26.5886
370	-2.88301	-0.79538	-2.19511	-0.0332222	-2.14528	0.634154	-4.45618	-0.912635	-0.0635133	-1.025	-4.59933	0.125072	-4.91054	-2.25618	-5.2413	-3.0286	-2.52049	-1.33768	-0.795869	-1.28785	-0.627803	-3.07355	1.29176	-1.77935	-0.930223	-3.02958	-2.12427	-0.68985	1.46373	-4.24561	-2.57326	0.414301	27.6062
372	-2.8962	-1.0978	-2.18534	-0.449478	-2.44868	-0.848145	-4.26613	-1.39045	-0.0332222	0.0102597	-3.63686	0.0996668	-4.72684	-1.63717	-4.96331	-3.28705	-2.93626	-1.58734	-1.03429	-1.60493	-0.921918	-3.04619	0.332711	-2.11792	-1.83211	-2.49411	-2.49656	-0.71721	1.83846	-3.097	-1.858	0.604352	29.6025
374	-3.19325	-1.55265	-2.13795	-0.422607	-2.21368	-1.18232	-3.72334	-1.4525	0.844725	0.992759	-3.30659	0.0214968	-4.88856	-1.64157	-4.37019	-3.41945	-2.93138	-1.47693	-0.892604	-1.61372	-0.878924	-2.68025	-0.0210082	-1.92689	-1.86045	-2.75891	-2.61039	-0.918986	2.80924	-2.42913	-0.418698	0.612169	31.995
376	-4.14057	-2.09496	-2.54004	-0.637086	-2.24983	-1.0636	-3.87235	-1.58099	0.483189	1.05432	-3.85427	-0.770463	-5.42695	-2.5884	-4.27004	-3.58019	-3.10091	-1.65818	-1.0123	-1.77983	-1.11832	-2.7467	-0.133378	-1.94936	-1.83162	-4.17428	-2.87031	-1.63571	2.84783	-2.44184	-1.47693	0.448989	33.7738
378	-4.64477	-2.34803	-2.60892	-0.912635	-2.53759	-1.36749	-4.53972	-1.97819	-0.964911	0.0952697	-4.18845	-1.32303	-5.64876	-2.50633	-4.59005	-3.91632	-3.50446	-1.84432	-1.50428	-1.9777	-1.54923	-3.2934	-0.481234	-1.94839	-2.09349	-5.10157	-3.08772	-2.20342	1.74221	-2.06711	-2.46138	0.229624	34.9713
380	-4.3057	-2.20146	-2.15456	-0.8159	-2.58841	-1.64841	-5.21687	-2.32654	-2.73888	-1.1789	-4.1264	-0.932666	-4.76788	-1.41537	-5.27697	-4.16451	-3.71894	-1.68847	-2.04219	-1.92787	-1.81648	-3.78831	-0.80564	-1.5678	-2.10424	-4.8866	-2.8747	-2.11255	-0.0224739	-2.13258	-1.93031	-0.0268709	35.9773
382	-4.09367	-2.07151	-2.12036	-0.817365	-2.79653	-1.97379	-6.22966	-3.07697	-5.34146	-2.93235	-3.99889	-0.746035	-4.33746	-1.3797	-6.60732	-4.82407	-4.03797	-1.65281	-2.87128	-2.08909	-2.35829	-4.32476	-1.33915	-1.61763	-2.08079	-5.07519	-3.18005	-1.94057	-2.38809	-3.06133	-1.6572	-0.256984	36.7922
384	-3.96811	-1.99236	-2.30211	-0.674216	-3.28558	-2.07688	-7.13448	-3.98667	-7.75593	-4.9037	-3.55429	-1.24095	-4.54608	-2.14479	-7.5693	-5.90721	-4.32427	-1.70362	-3.70135	-2.25374	-2.96802	-4.79769	-1.8326	-2.07346	-1.84139	-5.10988	-3.95785	-1.81354	-4.30277	-2.48043	-1.43735	-0.317566	37.7136
386	-3.53866	-1.92738	-2.04317	-0.304863	-3.02469	-1.8497	-6.6723	-4.13275	-7.25222	-5.2457	-2.98707	-1.23899	-3.52303	-3.03984	-6.57605	-6.23699	-4.07022	-1.47937	-3.64565	-1.94106	-2.80093	-4.34039	-1.82771	-1.90246	-1.51601	-3.71894	-4.32525	-1.57903	-3.67643	-1.21261	-1.00106	-0.164646	39.2834
388	-3.25725	-2.17362	-1.7256	-0.566733	-2.29038	-1.96207	-5.69664	-3.94417	-5.13675	-4.35749	-2.62505	-0.478303	-2.71934	-3.88945	-5.12551	-5.95998	-3.82447	-1.35918	-3.29584	-1.72463	-2.40715	-3.68914	-1.86729	-1.33329	-1.79889	-3.15367	-4.33257	-1.59174	-2.07981	-1.83651	-1.08998	0.170508	41.072
390	-3.29731	-2.22785	-2.02753	-0.982499	-2.50242	-2.27328	-5.80803	-3.9896	-4.52067	-3.99449	-2.9089	0.12898	-4.38729	-3.18054	-5.47972	-5.82513	-4.00279	-1.55803	-3.49078	-1.95962	-2.53759	-3.97495	-2.07297	-1.56242	-2.15016	-4.66626	-4.13666	-1.6445	-2.03096	-3.46586	-0.596047	0.420164	41.8205
392	-3.6823	-2.09251	-2.71103	-0.712813	-3.0755	-2.01532	-6.16078	-3.63588	-4.84508	-2.96948	-3.92804	0.227182	-6.31858	-1.18183	-6.37965	-5.23886	-3.9725	-1.7256	-3.50544	-2.07297	-2.56056	-4.293	-1.74026	-2.30797	-1.81403	-5.94483	-3.76389	-1.69336	-2.04415	-4.17233	0.497845	0.667865	42.2543
394	-4.29202	-2.66755	-3.02811	-0.366911	-3.20839	-1.55265	-5.76015	-2.82145	-4.24854	-0.58823	-4.57637	0.102598	-6.28927	-0.355674	-6.17201	-4.17575	-3.60168	-1.77495	-2.92698	-1.89318	-2.1873	-4.12347	-1.13005	-2.72862	-1.42611	-5.71423	-3.57335	-2.13258	-0.598489	-3.78538	0.541816	0.975171	44.3893
396	-4.49527	-3.27386	-2.72276	-0.141683	-3.19715	-1.08656	-5.29748	-2.21368	-2.6656	0.893093	-4.23095	-0.0727959	-5.05809	-0.41821	-5.40546	-3.43264	-3.26311	-1.63717	-2.36513	-1.57171	-1.79351	-4.08048	-0.678125	-2.55127	-1.09585	-4.54412	-3.03739	-2.42327	0.936575	-2.78334	-0.130446	1.07239	47.3593
398	-3.97348	-2.59818	-1.96207	0.436775	-2.82927	-0.422118	-5.09082	-1.91663	-1.37433	0.436287	-3.42092	0.0332222	-4.26613	-0.164646	-4.81185	-2.97437	-2.89962	-1.07777	-2.04805	-1.09145	-1.45396	-3.93586	-0.222296	-1.57855	-0.467555	-3.80835	-1.75736	-1.89855	1.27515	-2.3666	-0.0908727	1.05725	48.8235
400	-3.33151	-1.21017	-1.34941	0.85987	-2.01972	-0.219365	-4.65454	-1.75199	-0.745058	-0.0493449	-2.84979	0.653697	-4.55047	-0.0640017	-4.28372	-2.64068	-2.53124	-0.501754	-1.78179	-0.673728	-1.17695	-3.33346	0.0239395	-0.469997	-0.215945	-3.94221	-0.945857	-1.02647	1.22678	-2.95238	0.61852	0.970285	48.6662
402	-3.23624	-0.597512	-1.49549	0.420164	-1.72756	-0.925826	-4.50797	-2.12232	-0.995691	-0.320986	-3.09065	0.931689	-5.126	-0.334177	-4.11712	-2.76038	-2.62505	-0.631711	-1.91468	-0.774372	-1.32352	-3.08625	-0.447524	-0.402087	-0.805151	-4.61838	-1.33964	-0.793914	0.757761	-3.59875	0.72405	0.764601	48.1654
404	-3.80737	-1.32938	-2.4389	-0.475371	-2.49851	-1.80866	-5.26084	-3.09211	-2.25472	-1.54777	-4.3829	0.414301	-5.98734	-1.17011	-4.7415	-3.43948	-3.26702	-1.46276	-2.70859	-1.49207	-2.03682	-3.84743	-1.41781	-1.55119	-1.62691	-5.90477	-2.28452	-1.48376	-0.471951	-4.55536	0.0693759	0.631711	48.8489
406	-4.34137	-2.33631	-3.37597	-1.00058	-3.66422	-1.88292	-6.12658	-3.51472	-3.48443	-2.15749	-5.70055	-0.0820785	-6.94394	-1.95572	-5.51587	-3.85281	-3.74874	-2.10619	-3.34959	-2.0974	-2.58645	-4.80941	-1.76127	-2.76624	-1.90442	-6.53892	-2.66169	-2.16238	-1.2429	-4.7713	-0.596047	0.601421	50.5726
408	-4.23193	-2.54541	-3.42043	-0.97908	-4.23682	-1.45445	-6.50375	-3.23819	-4.44201	-1.28981	-5.72644	-0.0967353	-7.00403	-1.22532	-5.95998	-3.71161	-3.78099	-2.18974	-3.44681	-2.17606	-2.64312	-5.15922	-1.43393	-3.09749	-1.73586	-5.89988	-2.21417	-2.28159	-1.36407	-3.65982	-0.447524	0.551099	51.7637
410	-4.2974	-2.48532	-2.95532	-0.72063	-3.82398	-1.42563	-6.46515	-3.13022	-4.45129	-0.473906	-5.5149	0.256984	-6.84525	0.304863	-6.05036	-3.75998	-3.64712	-2.12574	-3.43411	-2.05929	-2.5244	-5.00679	-1.3372	-2.72716	-1.62349	-5.4675	-1.94741	-2.30308	-0.892115	-3.67399	0.57113	0.609726	53.1097
412	-5.05711	-2.56544	-2.7892	-0.852542	-3.32418	-1.8111	-6.24237	-3.52938	-2.79507	-0.637574	-6.0186	0.213013	-7.19115	0.221807	-5.81194	-4.30766	-3.75754	-2.3622	-3.51619	-2.24006	-2.55079	-4.85045	-1.72023	-2.40422	-1.90686	-5.72009	-2.48874	-2.45796	0.239884	-4.78205	0.331245	0.764601	54.5094
414	-5.40741	-2.38858	-3.11068	-1.27026	-3.34421	-1.88243	-5.92871	-3.92218	-1.19551	-1.07728	-6.10117	-0.568198	-7.48429	-1.57366	-5.37663	-4.76935	-4.01989	-2.68465	-3.45414	-2.60355	-2.72569	-4.77277	-1.97819	-2.56007	-2.2298	-5.76504	-3.13706	-2.48092	1.10513	-4.46791	-1.4012	0.501754	54.6721
416	-4.88318	-2.28208	-3.81079	-1.43882	-3.80346	-1.76322	-5.60528	-3.80004	-0.623406	-0.430912	-5.73866	-0.95856	-7.60643	-2.96216	-4.90028	-4.58369	-4.14936	-2.83513	-3.16589	-2.77259	-2.80533	-4.80746	-1.89611	-3.23624	-2.38077	-5.37663	-3.2377	-2.49362	1.62056	-3.9041	-2.09593	-0.108949	54.8138
418	-4.56953	-2.49069	-4.4	-1.48718	-4.3272	-2.07688	-5.40888	-3.49909	-0.423095	0.575038	-5.59209	-0.602398	-7.46963	-2.59524	-4.43077	-3.96615	-4.32964	-2.95385	-3.08869	-2.91476	-2.86835	-4.94328	-1.83504	-3.88114	-2.75061	-4.84654	-2.78823	-2.72227	2.0417	-4.71805	-1.06214	-0.437264	55.9033
420	-5.08398	-2.72032	-4.1479	-1.27759	-3.93537	-2.02949	-4.9208	-2.98072	-0.0337109	1.15789	-5.08252	-0.185654	-6.28878	-1.06262	-3.46	-3.0672	-4.29398	-2.77846	-2.86591	-2.73351	-2.64166	-4.5109	-1.45738	-3.45512	-2.72423	-3.65787	-1.94497	-2.99293	2.52001	-4.40928	0.269687	-0.188585	57.8771
422	-5.7753	-3.10579	-3.54941	-0.973705	-3.16882	-1.38508	-4.35944	-2.264	0.596046	1.79156	-4.94865	-0.0127026	-4.89149	0.0957583	-2.39689	-2.24104	-4.10344	-2.4819	-2.2811	-2.35096	-2.20733	-3.90704	-0.7988	-2.56593	-2.10864	-2.65241	-1.3841	-3.23428	3.0584	-3.10677	0.87355	0.386453	60.5539
424	-6.03961	-3.55967	-3.63784	-1.01035	-3.1097	-0.943903	-4.44104	-1.99773	1.43051	1.9137	-5.83344	-0.0566732	-4.37899	-0.0420164	-2.33289	-2.0461	-4.25929	-2.53564	-2.03731	-2.45014	-2.19072	-4.10051	-0.429447	-2.2855	-1.69189	-3.16637	-1.40364	-3.44339	3.40675	-3.41652	0.446058	0.714279	62.6396
426	-6.2707	-3.96322	-3.97006	-1.2175	-2.94408	-0.640017	-4.54559	-1.8966	2.41545	2.0588	-6.29122	-0.48954	-3.73408	-1.21554	-2.65387	-2.00115	-4.39218	-2.6397	-1.91272	-2.69589	-2.27377	-4.29593	-0.1666	-2.00506	-1.54923	-3.58458	-1.44566	-3.59973	3.9984	-4.5793	-0.881856	0.812968	64.2343
428	-6.87017	-4.40879	-4.35896	-1.54044	-3.15856	-0.565756	-4.55194	-1.73489	2.31286	2.62212	-6.26826	-1.28101	-3.55674	-1.83846	-2.80875	-1.74466	-4.59005	-2.96704	-1.82967	-3.06084	-2.40813	-4.35896	-0.0439706	-2.49949	-1.66062	-3.20595	-1.38068	-4.01892	4.22753	-4.92227	-1.85214	0.964423	65.5959
430	-6.73728	-4.15425	-4.87292	-1.80622	-4.46009	-1.14763	-4.97113	-1.92494	0.777792	2.56984	-6.41287	-1.47839	-4.9252	-1.09633	-3.20057	-1.7085	-5.14554	-3.48052	-2.13306	-3.63246	-2.83953	-4.95061	-0.379613	-4.13422	-2.14284	-3.69695	-1.53067	-4.14399	3.35007	-4.83921	-1.76664	0.946834	64.9495
432	-5.27501	-3.14097	-4.60128	-1.59271	-5.019	-1.93227	-5.38249	-2.35585	-1.24925	1.6616	-6.38893	-0.650765	-6.43437	0.0674217	-3.86746	-1.95376	-5.35953	-3.39502	-2.4775	-3.7165	-3.00857	-5.32338	-0.873062	-4.57783	-2.6314	-5.1475	-1.52969	-3.32516	1.87461	-4.56562	-0.991294	0.89065	63.1755
434	-4.08634	-2.46138	-3.85085	-1.11539	-4.30277	-2.15603	-5.39617	-2.77162	-2.32018	0.196402	-6.19595	0.170508	-6.76317	0.230113	-4.23535	-2.31237	-5.06688	-2.91183	-2.54101	-3.37548	-2.73449	-4.97064	-1.16082	-3.57579	-2.63091	-5.67612	-1.21457	-2.44477	0.825671	-4.12689	-0.112858	1.0465	63.1101
436	-4.25294	-2.60355	-3.53426	-0.801731	-3.30513	-1.69922	-4.72294	-2.82096	-1.10415	-0.878436	-6.0059	-0.116278	-6.51254	-0.463157	-3.39698	-2.74572	-4.65307	-2.65632	-2.17801	-3.03886	-2.18974	-4.09122	-1.04015	-2.72081	-2.1399	-4.81527	-1.53164	-2.4433	1.12614	-4.48012	-0.296069	1.00644	64.8982
438	-5.21394	-3.14048	-3.74728	-0.971263	-2.60844	-1.49256	-3.73848	-2.55518	0.65272	-1.18721	-6.2751	-0.896512	-6.34252	-0.641971	-2.12574	-3.04081	-4.35944	-2.8063	-1.62691	-2.94164	-1.72609	-3.16198	-0.875504	-2.5244	-2.06467	-4.02918	-2.29331	-3.05156	1.84335	-5.58085	-1.31081	0.738707	66.7484
440	-6.16957	-3.71112	-4.22362	-1.80817	-2.60941	-2.32067	-3.59533	-2.88985	0.372285	-2.10864	-6.80812	-1.38459	-7.02162	-1.23851	-2.02412	-3.62855	-4.59053	-3.44486	-1.71241	-3.33542	-1.93569	-2.98854	-1.38117	-2.8322	-2.91379	-4.01012	-2.7892	-3.67595	1.28736	-5.99564	-2.02656	0.53351	68.1677
442	-6.50912	-4.18698	-4.15181	-2.46578	-2.71885	-3.11166	-4.05751	-3.63051	-1.2859	-3.51081	-6.18618	-1.60151	-7.59764	-2.9519	-2.58499	-4.61936	-4.89784	-3.81909	-2.1443	-3.57042	-2.30504	-3.21914	-2.04952	-2.84783	-3.52742	-4.02576	-3.33102	-3.94661	-0.0483678	-4.44787	-1.65965	0.362514	69.906
444	-5.52271	-3.41066	-3.26897	-1.94741	-2.32898	-2.51805	-4.01012	-3.34177	-2.21807	-2.83317	-5.00239	-1.00839	-6.28487	-3.80835	-2.58841	-4.64379	-4.48403	-3.17517	-1.84481	-2.98414	-1.89758	-2.99977	-1.60102	-2.24153	-2.83953	-3.49469	-3.65591	-3.2079	-0.14266	-2.81754	-0.603375	0.199334	70.2514
446	-4.08878	-1.75443	-2.19023	-1.01816	-1.73244	-1.45005	-3.45609	-2.19853	-1.60884	-0.525205	-4.43566	-0.30926	-4.26466	-2.90646	-1.94301	-3.62904	-3.68327	-2.09447	-0.985431	-2.06809	-0.994714	-2.52147	-0.575527	-1.43784	-1.87461	-2.57326	-3.37401	-1.91956	1.13151	-3.06378	-0.563801	0.233533	69.0422
448	-3.42629	-0.975171	-1.43589	-0.485631	-1.31375	-1.13786	-2.93626	-1.60688	0.211059	0.13582	-3.85427	-0.192982	-2.34999	-1.53555	-1.0851	-3.18543	-3.11361	-1.3543	-0.468043	-1.45299	-0.395736	-2.19853	-0.200799	-0.757761	-1.56242	-1.52285	-2.95043	-1.2131	2.11743	-3.4473	-1.02696	0.372285	68.9088
450	-2.91818	-0.726981	-1.45738	-0.026871	-1.60884	-1.31472	-2.80142	-1.71779	1.91321	-0.289718	-3.64223	0.218388	-1.23557	-1.04406	-0.613634	-3.4258	-2.95483	-1.10855	-0.469997	-1.25756	-0.355185	-2.28452	-0.341994	-0.756295	-1.46276	-1.07777	-2.71397	-0.860359	2.5972	-3.07306	-0.78512	0.151943	69.1717
452	-3.05596	-1.22043	-2.12818	-0.0298023	-2.42962	-1.64255	-3.3618	-1.89758	1.59711	0.567221	-4.13715	0.256984	-1.72365	-1.66795	-1.025	-3.33249	-3.19178	-1.41097	-0.761669	-1.46031	-0.711347	-2.89425	-0.598489	-1.35723	-1.62056	-1.64255	-2.44232	-1.1364	2.80044	-2.12671	-0.600932	-0.180768	69.9294
454	-4.27053	-2.62847	-2.91379	-0.68643	-2.81608	-1.90149	-4.29935	-1.94888	-0.379125	1.84774	-4.71658	-0.899933	-2.97388	-2.48043	-2.13648	-2.94261	-3.44534	-1.91614	-1.09145	-1.75345	-1.03233	-3.61292	-0.761181	-1.60151	-2.03682	-2.24885	-2.38956	-2.29722	2.31823	-1.99236	-0.983477	-0.200311	72.1475
456	-4.76984	-2.90451	-2.95971	-0.874527	-2.28843	-1.77886	-4.5324	-1.90979	-1.30642	2.02363	-5.24032	-1.23264	-3.45414	-2.27524	-2.91574	-2.84734	-3.18983	-1.9137	-1.1364	-1.61372	-0.879413	-3.53573	-0.665422	-1.1706	-2.1228	-2.33777	-2.67488	-2.64312	1.92249	-3.53573	-0.969797	-0.211548	73.1163
458	-3.75363	-1.48963	-2.0803	-0.341994	-1.72658	-1.48425	-3.99937	-1.9694	-0.290206	0.989828	-4.88416	-0.0957584	-2.91281	-1.6616	-2.62309	-3.34226	-2.66267	-1.31619	-1.06067	-1.08803	-0.479769	-2.87079	-0.502731	-0.952209	-1.80035	-1.97672	-3.19031	-1.55265	2.23517	-3.84255	-0.333688	-0.392316	71.5402
460	-2.38712	0.0170997	-1.0934	0.462669	-1.38605	-0.874039	-3.64712	-2.23517	0.249167	-0.892604	-3.62123	0.424072	-2.42669	-1.54386	-2.13209	-4.09073	-2.2127	-0.535953	-1.12809	-0.525693	-0.200799	-2.31823	-0.334666	-0.566733	-0.961491	-1.20919	-3.75558	-0.242327	1.87559	-2.21807	-0.529602	-0.650277	69.3544
462	-1.80475	0.418698	-0.344925	0.947323	-0.815411	-0.531556	-4.08438	-2.79604	-1.82332	-2.92454	-2.51756	0.26529	-2.26742	-1.88292	-2.71445	-4.60959	-2.07395	-0.0371307	-1.60737	-0.177348	-0.325871	-2.14968	-0.454363	0.54719	-0.420164	-0.917032	-3.81567	0.220342	-0.182234	-0.682522	-1.21408	-0.733821	68.8575
464	-2.49411	-0.779257	-0.382545	0.223762	-1.10659	-1.39436	-5.22371	-3.70135	-4.74052	-3.72773	-1.93911	-0.00977113	-2.19414	-3.51961	-3.99156	-4.96477	-2.65583	-0.457783	-2.59524	-0.521785	-1.10513	-2.85663	-1.28297	0.54377	-1.31374	-1.66453	-3.93879	-0.723073	-2.15945	0.526182	-1.53311	-0.509571	71.0507
466	-3.74386	-2.77504	-1.29127	-1.09927	-2.29331	-2.1658	-5.98538	-4.17428	-5.66782	-2.52782	-2.17606	-1.03233	-2.35243	-5.35611	-4.56366	-4.96429	-3.37353	-1.30544	-3.26653	-1.1877	-1.82722	-3.84987	-1.89416	-0.918986	-2.34217	-3.2851	-4.53924	-2.24739	-2.13209	0.816877	-2.28208	-0.358605	74.1492
468	-4.38583	-3.7248	-1.8028	-1.53262	-2.4389	-1.82722	-5.61798	-3.69353	-4.19138	-0.246724	-3.07794	-2.11841	-2.93577	-5.32875	-4.06924	-4.3228	-3.35887	-1.43686	-2.99147	-1.26489	-1.72169	-3.84841	-1.60933	-1.43735	-2.18974	-4.83335	-4.60666	-2.76184	-0.448989	0.0752387	-3.12338	-0.344437	75.6549
470	-4.1049	-3.00661	-1.0211	-0.946834	-0.96198	-1.24437	-4.55927	-3.15611	-2.03437	0.683499	-3.22989	-2.18876	-3.46244	-3.26506	-2.99391	-3.86648	-2.78481	-0.851565	-2.34999	-0.714279	-1.16766	-2.68416	-1.14715	-0.0566732	-1.51064	-4.32622	-3.93733	-2.09349	1.04748	-0.0972239	-2.54737	-0.276526	75.2406
472	-3.31734	-1.49012	-0.171485	-0.306817	0.198845	-1.16669	-3.98374	-3.4214	-1.00155	-0.544747	-2.94945	-1.51943	-4.10979	-1.3455	-2.42816	-4.28176	-2.47701	-0.357139	-2.29234	-0.350788	-0.979568	-1.75492	-1.24877	1.07142	-1.28687	-2.71983	-3.78783	-1.07239	1.21066	-0.549633	-1.04943	-0.177348	73.7725
474	-2.8278	-0.498334	-0.507616	-0.282389	-0.208616	-1.47546	-4.33844	-3.93049	-0.777303	-1.56389	-3.07159	-0.956117	-4.44543	-1.88732	-2.77552	-4.84703	-2.70371	-0.434821	-2.77259	-0.617054	-1.20626	-2.03535	-1.63375	0.512991	-1.64743	-2.10522	-4.11907	-0.6322	1.10953	-1.73147	-0.630246	-0.0977126	72.4924
476	-3.25187	-0.906284	-1.31814	-0.580412	-0.929246	-1.64059	-4.90615	-4.07559	-0.671774	-1.44273	-3.19227	-1.15594	-3.55478	-3.51277	-3.35007	-4.93057	-2.94554	-0.880879	-3.12338	-1.03722	-1.45689	-2.62944	-1.74466	-0.392804	-1.98454	-1.98601	-4.13764	-1.16376	1.22971	-2.12867	-1.82722	-0.196402	72.6429
478	-4.02722	-1.74954	-1.60395	-0.714279	-0.802709	-1.44028	-4.74736	-3.73115	0.178814	-0.528136	-3.68279	-1.73342	-2.81119	-4.07266	-3.16931	-4.49771	-2.81852	-1.12956	-2.8322	-1.09536	-1.3626	-2.44819	-1.43198	-0.413813	-2.02607	-1.69043	-4.15816	-1.75834	1.97135	-2.22345	-2.88741	-0.580412	73.4359
480	-4.15962	-1.8409	-1.35185	-0.728447	-0.330268	-1.22287	-4.08829	-3.53133	1.44957	-0.10553	-4.0795	-1.90197	-2.48825	-3.54355	-2.12427	-4.44592	-2.61918	-1.06018	-2.44428	-1.01181	-1.12174	-1.83602	-1.28101	-0.00439706	-1.97868	-1.06653	-4.53288	-1.70264	2.78676	-1.87901	-2.80386	-1.00302	73.3557
482	-3.88945	-1.70997	-1.20089	-1.2048	-0.200799	-2.05245	-4.22558	-4.75567	0.640994	-2.4648	-3.88261	-2.10668	-1.88585	-3.30415	-1.75638	-6.04841	-3.02127	-1.28492	-3.19373	-1.37628	-1.66893	-1.88536	-2.39787	0.459737	-2.69687	-0.744081	-5.60284	-1.59369	1.34013	-1.0592	-3.20351	-1.11685	72.9566
484	-3.52645	-1.74563	-1.41634	-2.02509	-0.570641	-3.57237	-5.17828	-6.29562	-1.7642	-4.88221	-3.8489	-2.16238	-1.73879	-3.80688	-2.63189	-7.80283	-3.83229	-1.901	-4.46839	-2.12818	-2.70224	-2.6226	-3.82007	0.471952	-4.05849	-1.24437	-6.85844	-1.69043	-0.891138	-0.951232	-3.52303	-1.12711	72.8007
486	-3.31734	-2.03291	-1.83895	-2.56984	-0.998622	-4.14936	-5.72742	-6.36402	-3.04912	-4.01989	-3.95589	-1.84726	-2.1912	-3.99595	-3.39893	-7.83557	-4.27541	-2.46529	-4.84019	-2.73839	-3.14244	-3.05107	-3.97983	-0.273107	-4.80648	-1.78179	-7.19262	-1.8839	-1.1447	-1.40462	-2.84881	-1.2258	72.9058
488	-3.94563	-2.99293	-2.38419	-3.02274	-1.04748	-4.00866	-5.53102	-5.86275	-2.67732	-2.63824	-3.95345	-2.19072	-3.24357	-3.90362	-3.4473	-7.22828	-4.30815	-2.91086	-4.61252	-3.07208	-3.05791	-2.83073	-3.631	-1.01963	-4.9638	-2.54053	-6.64885	-2.44672	-0.390362	-2.20342	-2.80533	-1.05872	73.6977
490	-4.63011	-3.53426	-2.79898	-3.2851	-1.56389	-3.89775	-5.49975	-5.9077	-2.32654	-2.88936	-3.87332	-2.83757	-4.73417	-4.02673	-3.69988	-6.96055	-4.37899	-3.15856	-4.58858	-3.24406	-3.0242	-2.94261	-3.61634	-1.76078	-4.91885	-3.92072	-5.95607	-2.7809	-0.350299	-2.8063	-3.28607	-0.717699	74.1125
492	-4.3272	-2.6397	-2.56691	-2.70908	-2.03193	-3.29536	-5.64143	-5.73866	-2.91721	-2.93626	-3.39991	-2.3622	-5.63362	-3.77708	-4.09513	-6.42851	-4.19333	-2.80582	-4.52653	-2.95678	-2.83415	-3.25774	-3.18396	-2.04952	-4.15425	-4.41661	-5.23593	-2.19755	-0.693759	-1.9093	-2.8151	-0.525693	73.2033
494	-3.70037	-1.38068	-2.26302	-1.90833	-1.63229	-2.47408	-5.51978	-5.06591	-3.73848	-1.73977	-3.11361	-1.49012	-6.12853	-3.14341	-4.01745	-5.56815	-3.67741	-2.29478	-4.23486	-2.45405	-2.43597	-3.15172	-2.34608	-1.47204	-3.1781	-3.63588	-4.36091	-1.50233	-0.714767	-1.42953	-2.25325	-0.400621	71.9096
496	-3.33639	-0.664934	-2.50633	-1.59955	-1.53262	-2.11938	-5.58134	-4.55145	-3.92169	0.0112369	-3.32907	-1.33084	-5.98929	-2.53222	-4.07559	-4.84996	-3.48101	-2.24739	-3.98765	-2.33533	-2.2513	-3.18005	-1.94204	-1.22287	-2.85027	-2.98072	-3.71747	-1.18672	-0.155851	-2.68563	-2.29966	-0.428469	70.4849
498	-2.76429	-0.115301	-2.46871	-1.26733	-1.73098	-2.06809	-5.70055	-4.34088	-3.13071	0.978102	-3.30757	-0.969797	-5.07568	-2.87177	-4.33746	-4.54754	-3.50983	-2.15994	-3.77366	-2.34119	-2.08128	-3.37157	-1.9264	-1.30837	-2.82487	-2.93235	-3.81274	-0.772906	0.730401	-3.86551	-2.06418	-0.555496	68.7383
500	-2.24641	0.214479	-1.99773	-0.761181	-1.40071	-1.93715	-5.43135	-4.25831	-2.09887	0.756784	-3.52938	-0.40453	-4.64135	-4.40293	-4.25049	-4.65307	-3.38672	-1.86778	-3.52205	-2.1956	-1.71925	-3.11996	-1.80328	-0.911658	-2.66022	-3.09651	-4.48794	-0.381079	1.32107	-4.16891	-1.99578	-0.370819	67.918
502	-2.39884	0.0796357	-1.87266	-0.533022	-0.993248	-1.93666	-5.24228	-4.17379	-1.71779	0.698156	-4.357	-0.286786	-4.84556	-4.96624	-4.27004	-4.84312	-3.29438	-1.82087	-3.37548	-2.16873	-1.51601	-2.73009	-1.65574	-0.643926	-2.55763	-3.25187	-4.92325	-0.453386	1.76273	-4.00328	-2.04512	-0.0605818	68.3641
504	-2.94212	-0.284343	-2.1316	-0.764112	-1.04601	-2.56642	-5.5701	-4.51969	-2.14821	0.378148	-5.06688	-0.242327	-4.64916	-3.96371	-4.61057	-5.29211	-3.5113	-2.06809	-3.68083	-2.38858	-1.83944	-2.84197	-2.13453	-0.748966	-2.88985	-3.36669	-5.03171	-0.822251	1.55167	-4.1137	-1.28052	-0.0405507	68.6733
506	-3.50006	-0.883321	-2.59818	-1.29811	-1.8839	-3.28412	-6.44463	-5.65072	-3.5069	-1.92836	-5.2369	-0.626826	-3.81958	-3.24503	-5.05662	-6.37574	-4.12005	-2.51317	-4.63988	-2.81998	-2.67879	-3.823	-3.10579	-1.19112	-3.38134	-3.53426	-5.33706	-1.34159	-0.302909	-3.93	-1.12614	-0.270175	68.4159
508	-3.78441	-1.47057	-3.39453	-1.79547	-3.71943	-3.8274	-7.74812	-6.93857	-5.09864	-4.73661	-4.57197	-1.44663	-3.08674	-3.45805	-5.98147	-7.55806	-4.9252	-2.99782	-5.75673	-3.40137	-3.64224	-5.53444	-4.02966	-2.39689	-3.7336	-4.15083	-5.72058	-1.72951	-2.40031	-2.48043	-2.26058	-0.506151	68.0451
510	-3.81177	-1.50038	-3.73262	-1.69189	-4.80941	-4.15913	-8.22007	-7.23024	-5.0791	-5.02926	-3.6735	-1.47497	-2.25325	-3.4004	-6.29611	-7.63672	-5.15482	-2.97486	-6.01909	-3.43557	-3.887	-6.40359	-4.37801	-3.06817	-3.65885	-4.18552	-5.38787	-1.64108	-2.28256	-0.868664	-2.10668	-0.617055	68.1047
512	-4.41807	-1.62545	-3.53719	-1.43931	-4.80843	-4.52604	-8.12529	-7.19604	-4.19626	-3.92804	-4.05947	-1.08021	-2.69833	-2.84246	-5.93115	-7.24734	-5.16753	-2.88692	-5.94727	-3.2636	-3.90655	-6.52427	-4.54461	-2.89718	-3.50935	-3.6735	-4.97796	-1.82967	-1.19405	-1.51796	-0.971263	-0.62194	68.6797
514	-5.74599	-2.63042	-3.71405	-1.93959	-5.08203	-5.10255	-8.53959	-7.64307	-4.34479	-3.59631	-5.60235	-1.37824	-4.96526	-2.66804	-6.07137	-7.43104	-5.75625	-3.38037	-6.43584	-3.72529	-4.53924	-7.07732	-5.06004	-3.10628	-3.88163	-4.04383	-5.3268	-2.85174	-1.3455	-4.07266	-1.49696	-0.405018	69.6163
516	-6.70845	-3.64272	-4.12347	-2.65876	-5.20515	-5.37859	-8.79315	-7.77401	-5.39275	-3.12827	-6.42313	-1.94106	-6.2751	-3.37939	-6.32835	-7.52631	-6.32786	-3.86062	-6.80324	-4.18014	-5.09082	-7.29424	-5.34878	-3.30073	-4.37606	-4.92569	-5.68785	-3.70233	-2.18778	-5.03855	-3.13608	-0.0307795	70.3091
518	-6.01958	-3.08332	-4.18405	-2.58596	-5.02633	-5.31361	-8.82637	-7.49846	-6.76073	-2.64361	-6.04157	-1.89513	-5.99515	-4.69509	-6.5399	-7.28496	-6.45391	-3.69451	-6.88092	-4.15571	-5.19342	-7.10321	-5.21883	-3.15856	-4.52165	-5.74061	-5.69811	-3.17566	-3.01345	-4.57832	-3.95149	0.0874527	68.2595
520	-3.82887	-1.01621	-3.47368	-1.45347	-4.80159	-4.62815	-8.62411	-7.03042	-7.0182	-3.16686	-4.83384	-1.02598	-5.21834	-5.08887	-6.42948	-6.81692	-6.11143	-2.87861	-6.69331	-3.66764	-4.88123	-6.83646	-4.59102	-2.70761	-3.76096	-5.69322	-5.22176	-1.44957	-3.25578	-3.90997	-3.1185	-0.198356	63.9392
522	-2.59231	0.157317	-2.65827	-0.480746	-4.43468	-3.89189	-7.81798	-6.54918	-5.46164	-3.45756	-3.6437	-0.134355	-5.02731	-4.37606	-5.58036	-6.44805	-5.66928	-2.12525	-6.11436	-3.13218	-4.37703	-6.25751	-3.96908	-2.07493	-2.83171	-4.46253	-4.67164	-0.48612	-2.38321	-2.43011	-1.80231	-0.435309	61.8384
524	-3.67643	-0.671774	-2.95532	-0.637086	-4.25245	-4.0365	-7.00452	-6.42948	-3.67839	-2.88301	-4.01403	-0.161226	-5.77725	-3.78294	-4.57637	-6.29757	-5.75185	-2.22149	-5.71227	-3.2167	-4.26808	-5.67954	-4.12933	-2.27572	-2.8918	-3.4043	-4.71707	-1.29909	-1.19112	-1.86875	-1.28834	-0.284832	62.7906
526	-5.2711	-1.93275	-3.84157	-1.19258	-4.28176	-4.48843	-6.52573	-6.6767	-2.4604	-3.36375	-5.22909	-0.993248	-5.41963	-4.10783	-3.63002	-6.32982	-6.22185	-2.86933	-5.7025	-3.73555	-4.55731	-5.42549	-4.64037	-3.09016	-3.4385	-3.21083	-5.03513	-2.4477	-0.758738	-2.45552	-1.80377	-0.212525	63.8297
528	-5.6473	-2.33973	-4.21923	-1.51503	-4.2974	-4.61008	-6.25849	-6.9498	-1.63424	-4.79573	-5.91649	-1.68505	-3.7805	-4.80746	-2.82585	-6.7661	-6.49837	-3.26458	-5.6898	-4.09757	-4.74883	-5.51001	-4.77179	-3.3447	-3.73995	-3.47319	-5.65365	-2.70908	-0.85987	-3.22793	-3.33249	-0.466577	63.2278
530	-5.38347	-1.92689	-4.17916	-1.66062	-4.72196	-4.51627	-6.34741	-6.84769	-1.44761	-4.6433	-6.08651	-1.48914	-3.44779	-3.94661	-2.88692	-7.04849	-6.60146	-3.33835	-5.52613	-4.24219	-4.80257	-5.99857	-4.49478	-3.38672	-3.79809	-4.058	-6.16908	-2.49753	-0.58823	-3.72334	-3.90459	-0.582855	61.2325
532	-5.58281	-1.75834	-4.16695	-1.81306	-5.53542	-4.37899	-6.56384	-6.42118	-1.09975	-2.78432	-6.21207	-1.0509	-4.7542	-2.70371	-3.45218	-6.75731	-6.77783	-3.50348	-5.30921	-4.4039	-4.81772	-6.50619	-4.19871	-3.72089	-3.83668	-4.67212	-6.05915	-2.56153	0.352254	-3.52987	-2.42474	-0.162203	59.8054
534	-5.9077	-2.10961	-4.03944	-1.79449	-5.4294	-3.73408	-6.15491	-5.4675	0.640994	-0.288741	-6.07919	-0.800266	-5.40839	-2.68123	-3.37255	-5.79386	-6.56531	-3.48443	-4.64183	-4.27004	-4.35505	-6.21403	-3.52107	-3.51325	-3.55625	-4.43713	-5.32729	-2.6783	2.18094	-3.22549	-1.1447	0.440195	59.6301
536	-5.90037	-2.32947	-3.87284	-1.69727	-4.44739	-2.99	-5.36686	-4.40439	2.71787	1.61177	-5.36491	-0.603375	-4.77228	-2.85125	-2.77601	-4.83384	-6.0528	-3.22158	-3.79027	-3.93977	-3.64859	-5.35953	-2.61723	-2.86884	-3.31392	-3.42043	-4.33697	-2.58108	4.12103	-2.96948	-1.54923	0.597024	59.3433
538	-5.93995	-2.49265	-4.3101	-1.98601	-4.2334	-3.24699	-5.3908	-4.3697	2.19951	1.22238	-5.53932	-0.729913	-4.55389	-3.06329	-2.68416	-4.97796	-6.25751	-3.46733	-3.88847	-4.23779	-3.77757	-5.19098	-2.6187	-3.11214	-3.77659	-3.09162	-4.07364	-2.69687	3.77561	-3.46586	-2.40764	0.436775	58.6998
540	-5.89891	-2.56398	-4.78743	-2.22491	-4.89491	-3.47075	-6.19351	-4.71805	-1.07972	-0.32978	-6.37379	-1.09927	-5.33559	-3.71112	-3.37792	-5.36637	-6.76855	-3.89042	-4.57881	-4.7542	-4.36433	-5.71423	-2.85907	-3.89384	-3.94905	-4.27053	-4.39267	-2.91476	1.30984	-3.9002	-2.73986	0.258938	58.1048
542	-5.50464	-2.58841	-4.48549	-2.00799	-5.0791	-2.72423	-6.60683	-4.34039	-3.42092	-1.0167	-5.91601	-1.22825	-5.86275	-4.46839	-3.83033	-5.00826	-6.53501	-3.74923	-4.65844	-4.52898	-4.24952	-5.87741	-2.26009	-3.92462	-3.27484	-5.49047	-4.56366	-2.98903	-0.416744	-2.91721	-2.26595	0.18028	58.1062
544	-4.8099	-2.55567	-3.79271	-1.77006	-4.18161	-1.83895	-6.09531	-3.55087	-2.64948	-1.0934	-4.49185	-1.0763	-5.4846	-4.41319	-3.35643	-4.46644	-5.78947	-3.23038	-4.0536	-3.84645	-3.52205	-5.21932	-1.30202	-3.16295	-2.80337	-5.19244	-4.37215	-2.81168	-0.169043	-2.44379	-1.58587	0.271152	58.2904
546	-4.63109	-2.72667	-3.6906	-2.22638	-3.50299	-2.09447	-5.53199	-3.34128	-0.847656	-1.53555	-4.04823	-1.66698	-5.0791	-3.91925	-2.79751	-4.56122	-5.58476	-3.32271	-3.69744	-3.8445	-3.24992	-4.64086	-1.14812	-2.8151	-3.46977	-4.15913	-4.36238	-2.83953	0.748967	-3.54501	-1.91126	0.370331	57.9108
548	-5.55984	-3.51228	-4.64916	-3.17663	-4.39804	-3.43118	-5.95704	-4.03064	-0.56429	-2.32263	-5.24374	-2.84197	-4.95451	-4.03944	-3.08136	-5.41816	-6.3005	-4.33844	-4.16109	-4.76984	-3.88407	-5.32973	-2.05392	-3.60901	-4.80697	-4.12835	-4.81918	-3.61683	0.8159	-3.97934	-2.71739	0.478303	57.5805
550	-6.22331	-3.68865	-5.85103	-3.49127	-5.95265	-3.91094	-6.95371	-4.44983	-1.31228	-2.28256	-6.27363	-2.89571	-5.05223	-3.98227	-4.07706	-5.61505	-6.93612	-5.07617	-4.65063	-5.51734	-4.46009	-6.73093	-2.57619	-4.92373	-5.1514	-5.7455	-4.76837	-4.07657	0.562336	-3.66422	-3.20155	0.512014	56.7373
552	-6.26679	-2.84197	-6.31321	-3.06036	-6.62149	-2.92796	-7.33479	-3.65298	-1.12858	-0.554519	-6.52964	-1.8067	-5.7196	-2.69931	-4.77814	-4.22314	-6.74607	-5.00874	-4.31401	-5.40253	-4.17868	-7.38658	-1.82527	-5.61896	-4.32036	-7.23073	-3.95638	-3.80493	1.3372	-4.82993	-2.8962	0.396713	55.1871
554	-6.44658	-2.63482	-6.02349	-2.94799	-6.14807	-2.0759	-6.92049	-2.43011	-0.252098	1.83113	-6.79249	-1.40999	-6.42851	-1.8541	-4.72147	-2.53466	-6.24139	-4.82114	-3.57042	-5.02047	-3.5069	-6.87945	-0.817365	-5.20954	-3.84694	-6.93466	-3.24796	-3.77903	2.50926	-6.34301	-2.48581	0.213502	54.3961
556	-6.54185	-3.59973	-5.73182	-3.36033	-5.41327	-2.24934	-6.70503	-2.1702	-0.939506	2.21807	-7.11054	-2.06467	-6.50228	-2.44232	-4.86706	-1.97379	-6.04938	-4.96282	-3.36278	-5.01803	-3.24112	-6.13439	-0.677636	-4.49673	-4.30619	-5.90819	-2.88301	-4.25538	2.00213	-6.31907	-2.63531	0.332223	54.4019
558	-6.32102	-4.41661	-5.88327	-3.67106	-5.26719	-2.89913	-7.15256	-3.16931	-3.13901	-0.30242	-7.20386	-2.62505	-6.28829	-3.19422	-5.42695	-3.01443	-6.24725	-5.28136	-3.97641	-5.3053	-3.61976	-5.9331	-1.42123	-4.5363	-4.81772	-5.25009	-3.22451	-4.59933	-0.204708	-5.43624	-2.77797	0.546213	53.971
560	-5.53639	-3.92072	-5.58036	-3.38232	-4.95403	-2.92649	-7.23561	-3.88847	-3.96273	-2.18778	-6.33422	-2.62309	-6.02789	-3.10384	-5.40155	-4.27004	-6.02202	-4.9848	-4.28958	-4.99897	-3.66862	-5.70201	-1.76127	-4.36238	-4.53728	-4.88953	-3.76877	-3.99742	-1.08119	-4.21776	-2.95678	0.288252	52.7731
562	-4.62669	-2.62016	-4.61838	-2.83464	-3.95149	-2.48385	-6.51987	-3.53817	-2.78383	-1.62496	-5.41865	-2.28598	-5.39373	-2.55127	-4.5876	-4.25538	-5.28283	-4.18161	-3.80199	-4.09073	-3.06622	-5.00288	-1.35136	-3.30317	-3.98863	-4.21923	-3.70379	-2.90255	0.0610703	-3.40528	-2.79556	-0.119209	51.41
564	-4.55438	-2.24592	-4.31401	-2.91525	-3.4302	-2.70419	-5.76944	-3.24406	-0.925338	-0.634643	-5.66635	-2.23273	-4.88172	-3.15807	-3.42531	-4.15034	-4.90419	-3.96762	-3.37353	-3.74239	-2.7682	-4.50894	-1.32987	-2.8234	-4.1904	-2.97632	-4.19382	-2.71152	1.55754	-3.76584	-2.499	-0.292161	51.0944
566	-5.00874	-3.06817	-4.77814	-3.26897	-3.73946	-2.83708	-5.35953	-3.02567	0.877947	0.576504	-6.21891	-2.64019	-4.64721	-3.70819	-2.48043	-4.2373	-4.79085	-4.18307	-3.1224	-3.9041	-2.68416	-4.52507	-1.29665	-3.2421	-4.39022	-2.54834	-4.75811	-3.35349	3.27435	-4.04628	-2.97437	-0.204219	52.0456
568	-5.57059	-4.0751	-5.3522	-3.32613	-4.24268	-2.39445	-5.65462	-2.85614	1.04308	1.23557	-6.58338	-3.03397	-4.67017	-3.04619	-2.61283	-4.01794	-4.8099	-4.40048	-3.18299	-4.08536	-2.70468	-4.97796	-1.01963	-3.73408	-4.06924	-3.86648	-4.25929	-4.11077	3.78489	-3.93781	-3.32174	-0.195914	52.8972
570	-6.60097	-5.00923	-5.8349	-3.87821	-4.32964	-2.98707	-6.51303	-3.80346	-1.20577	-0.973705	-7.12959	-3.72334	-5.84663	-4.34381	-3.61341	-4.61008	-5.3654	-5.01852	-4.07315	-4.5236	-3.35496	-5.45578	-1.8409	-3.83473	-4.57441	-5.29651	-4.24854	-5.02878	1.45103	-4.73222	-3.90068	-0.491983	53.2089
572	-7.30597	-5.27061	-5.70641	-4.70144	-3.61243	-4.39413	-6.97081	-5.14701	-3.53573	-3.7336	-7.16673	-4.46644	-6.88287	-6.96251	-4.21581	-5.596	-5.90917	-5.57352	-5.03073	-4.99409	-3.96224	-5.19586	-3.20937	-3.2851	-5.7836	-4.79964	-5.0322	-5.44601	-1.10953	-5.62433	-4.76739	-0.702553	52.6338
574	-6.57801	-4.16353	-4.87879	-4.45618	-2.92014	-4.53777	-6.71139	-4.98871	-3.81714	-2.52245	-6.0445	-4.0067	-5.79728	-6.7451	-4.0282	-5.17876	-5.77383	-5.19049	-4.93937	-4.87439	-3.71943	-4.58467	-3.26604	-2.58938	-5.85298	-3.14244	-5.14066	-4.57979	-0.563801	-4.84459	-4.33355	-0.724538	50.7216
576	-5.64583	-3.24308	-4.56171	-3.88407	-3.66959	-4.08194	-6.9288	-4.19236	-3.32565	0.69669	-5.60821	-3.15025	-3.85281	-4.80648	-4.35114	-4.10393	-5.75673	-4.84801	-4.60226	-4.83335	-3.59533	-5.21296	-2.70371	-2.76429	-5.39764	-2.92014	-5.12307	-3.83571	1.13249	-3.33297	-3.9129	-0.805151	48.888
578	-5.72937	-3.69304	-5.33217	-4.03602	-5.28381	-4.34283	-7.85267	-4.33306	-3.87332	1.26635	-6.39431	-3.11703	-2.88447	-3.89775	-5.44845	-3.80444	-6.25898	-5.33852	-4.89002	-5.31849	-4.12933	-6.66155	-2.81559	-3.99644	-5.61505	-3.98618	-5.68785	-4.30131	0.80564	-2.9431	-4.27932	-0.746524	48.74
580	-6.56433	-4.71707	-6.24285	-4.50015	-6.15784	-4.78254	-8.64463	-5.22371	-5.56913	-1.12223	-7.02651	-3.8914	-3.44632	-4.54217	-6.28389	-4.30961	-6.80665	-5.9805	-5.56668	-5.81292	-4.73417	-7.33772	-3.40724	-5.22469	-5.91601	-4.46595	-6.68989	-5.29553	-1.22922	-3.6779	-4.5622	-0.433355	49.6687
582	-7.62549	-5.38836	-6.70015	-4.92764	-6.0914	-5.10743	-9.06675	-6.25556	-6.91218	-3.98032	-7.60936	-4.96038	-4.36922	-5.90379	-6.43193	-5.31019	-7.25516	-6.30832	-6.31467	-6.13879	-5.2198	-7.38756	-4.11565	-5.50415	-6.05622	-4.21092	-7.6592	-6.02007	-2.95629	-4.19724	-4.88025	-0.271152	50.1387
584	-8.15802	-5.33755	-6.94199	-5.10304	-5.92382	-5.19782	-9.05209	-6.93222	-6.67914	-5.94678	-7.82091	-5.27061	-4.38241	-6.11143	-6.05036	-6.30734	-7.38951	-6.32151	-6.6938	-6.19693	-5.42207	-7.41198	-4.51578	-5.3693	-6.01812	-4.23291	-7.8385	-6.11876	-3.524	-3.61243	-4.98871	-0.409904	49.6326
586	-7.86635	-4.5749	-6.92489	-4.9125	-5.95558	-5.16557	-8.73159	-7.29033	-5.87008	-6.96641	-6.90388	-4.42149	-3.97641	-5.47776	-5.50952	-6.99524	-7.3602	-6.21256	-6.74021	-6.13	-5.41865	-7.29717	-4.63695	-5.36686	-5.91161	-4.51969	-7.66848	-5.61358	-3.75949	-2.8024	-4.33404	-0.6151	48.1762
588	-7.21558	-3.67448	-6.84427	-4.6858	-6.13439	-5.47532	-8.77019	-7.6162	-6.00834	-6.74852	-5.98636	-3.39062	-3.52791	-5.67319	-5.57401	-7.43495	-7.65871	-6.25604	-6.90192	-6.31907	-5.58183	-7.30694	-4.88318	-5.5276	-6.14954	-4.69655	-7.6035	-5.03268	-4.09855	-2.78188	-3.75412	-0.896513	45.877
590	-6.62491	-3.43704	-7.16086	-4.86755	-6.79444	-6.08016	-9.4659	-7.98018	-7.56393	-5.45969	-5.90233	-3.31636	-3.71308	-6.80421	-6.43632	-7.72662	-8.29824	-6.62296	-7.27519	-6.85258	-6.03912	-7.87416	-5.28625	-6.31858	-6.73093	-5.07421	-7.51116	-4.89638	-4.3658	-3.54745	-4.54705	-1.03575	44.0141
592	-5.99076	-3.50495	-7.12715	-4.86657	-6.80959	-5.93164	-9.37356	-7.81456	-8.51907	-4.12738	-5.88865	-3.84303	-4.31841	-7.31476	-6.32835	-7.4882	-8.25134	-6.59804	-7.04556	-6.86675	-5.84712	-7.68705	-5.05662	-6.7451	-6.62344	-4.50064	-6.99231	-4.78254	-3.99791	-4.11516	-5.86617	-0.861825	43.7972
594	-5.47679	-3.39014	-6.14563	-4.1904	-5.20466	-4.82944	-7.96357	-7.0397	-7.70805	-3.46196	-5.53444	-3.92853	-4.42931	-6.61025	-4.89735	-6.89948	-7.23122	-5.81243	-6.08065	-6.02398	-4.74101	-6.04254	-4.09464	-5.56913	-5.59355	-2.5884	-6.29562	-4.44006	-3.0672	-3.80932	-5.53639	-0.808083	44.3942
596	-5.03708	-3.1952	-5.12453	-3.60364	-3.51228	-4.22802	-6.86675	-6.79933	-6.85453	-3.89336	-5.32631	-3.63784	-4.48501	-6.27314	-4.03211	-7.10419	-6.53795	-5.14114	-5.60333	-5.3224	-4.06533	-4.65307	-3.67497	-3.87772	-4.92129	-1.57855	-6.41874	-4.00231	-2.92112	-3.85232	-4.17281	-1.01963	44.1631
598	-4.94279	-3.01003	-5.3097	-3.79076	-3.37646	-4.83677	-7.23366	-7.70366	-7.11885	-5.71667	-5.91796	-3.77708	-4.22802	-6.59266	-4.63744	-8.42429	-6.89313	-5.30872	-6.28682	-5.51099	-4.55682	-4.81088	-4.41172	-3.47808	-5.36491	-2.6226	-7.28984	-3.75851	-4.16646	-4.84214	-4.14741	-1.22141	43.186
600	-5.85445	-3.32027	-6.2194	-4.43273	-3.98423	-5.6942	-8.17121	-8.7824	-7.5268	-7.32502	-6.75926	-4.00768	-3.40968	-6.34447	-5.71081	-9.62029	-7.49993	-5.93799	-7.18578	-6.10117	-5.31947	-5.58036	-5.3395	-4.06289	-6.11143	-3.92365	-7.86488	-4.18649	-5.14994	-5.04832	-4.88074	-1.2942	43.2041
602	-6.64494	-3.8059	-6.50033	-4.68238	-4.21043	-5.56864	-8.39693	-8.84738	-6.96055	-6.72946	-6.7793	-3.77659	-3.3447	-5.67759	-5.82758	-9.72875	-7.45889	-6.1427	-7.20972	-6.19107	-5.39275	-5.74843	-5.28234	-4.42003	-6.06453	-4.12835	-7.57516	-4.60519	-4.33746	-3.92853	-5.10059	-1.31765	43.5646
604	-6.40457	-3.85769	-6.40017	-4.51578	-4.73026	-4.82651	-8.27039	-8.14678	-6.00248	-4.69948	-6.27803	-3.73115	-4.48647	-5.60821	-5.48021	-9.19231	-7.11152	-5.99173	-6.79004	-5.95558	-5.17192	-5.92724	-4.64086	-4.79182	-5.57939	-4.32573	-7.01625	-4.60031	-2.73791	-3.0628	-5.28771	-1.15252	42.7966
606	-6.28487	-3.97055	-6.31418	-4.30863	-5.46164	-4.56904	-8.287	-7.60155	-4.99311	-3.08527	-5.99124	-3.89971	-5.4421	-5.88571	-5.54421	-8.55327	-6.91902	-5.8266	-6.5995	-5.75038	-5.08789	-6.44316	-4.34088	-5.00777	-5.42891	-4.9252	-6.55114	-4.74052	-1.31668	-3.24699	-5.19538	-0.593604	42.0985
608	-6.51645	-3.84206	-6.06599	-3.92023	-5.64876	-4.78107	-8.33683	-7.56442	-3.90752	-3.03691	-5.93946	-3.70966	-5.04929	-5.93457	-5.66	-8.14825	-6.87945	-5.50512	-6.5912	-5.47141	-5.04539	-6.6938	-4.36531	-4.91836	-5.42793	-4.73857	-6.0186	-4.66968	-0.47586	-3.56113	-4.47768	-0.115301	41.5156
610	-6.08847	-2.77162	-5.55984	-3.25676	-5.41816	-4.81137	-8.45946	-7.92058	-3.41359	-4.44445	-5.50659	-3.20644	-3.91778	-6.04303	-5.44699	-8.57916	-6.75438	-4.92618	-6.84965	-5.00728	-5.00044	-6.63908	-4.46497	-4.62278	-5.08594	-3.7463	-5.959	-3.80786	-0.692293	-3.04179	-4.37215	-0.426027	39.7656
612	-5.53541	-1.93275	-5.13431	-2.80337	-5.10353	-4.92569	-8.80194	-8.67638	-3.87039	-6.41043	-5.10206	-2.77504	-3.88994	-6.25165	-5.51441	-9.90365	-6.57947	-4.52214	-7.48283	-4.5964	-5.1431	-6.65031	-4.891	-3.95394	-4.75811	-4.05263	-6.76659	-3.11898	-1.78716	-2.89815	-4.73808	-1.20235	38.2334
614	-5.25596	-1.94057	-4.95305	-2.62602	-5.09424	-5.19342	-9.49326	-9.4703	-5.5447	-8.17121	-5.24423	-2.41887	-5.02633	-5.76651	-6.33617	-11.0811	-6.57361	-4.41221	-8.16095	-4.41612	-5.50659	-6.99182	-5.43673	-3.51765	-4.6946	-6.04059	-7.8214	-3.06768	-3.63686	-4.08341	-3.79369	-1.49256	37.8406
616	-4.5407	-1.7256	-4.43468	-2.2938	-5.34048	-4.91152	-10.211	-9.56068	-7.5395	-8.821	-4.96038	-2.05489	-5.13186	-4.89344	-7.1125	-11.1475	-6.40066	-4.02576	-8.44432	-4.06973	-5.59502	-7.47501	-5.35856	-3.42678	-4.37996	-6.7832	-8.43552	-2.8107	-5.31654	-4.10783	-2.39835	-1.3968	37.034
618	-3.26995	-0.790494	-3.47515	-1.5849	-5.4035	-3.89678	-10.4508	-8.59968	-7.94696	-7.32746	-4.52653	-1.62985	-4.57197	-4.32427	-7.31623	-10.0116	-5.74843	-3.20253	-8.0305	-3.29291	-5.13479	-7.67092	-4.3785	-3.18543	-3.46977	-5.74696	-7.95917	-1.94106	-5.10011	-2.50828	-2.10131	-1.43393	34.8096
620	-2.28843	0.120186	-2.64948	-0.760203	-4.94621	-3.03691	-10.1611	-7.34212	-7.43934	-4.73124	-4.74687	-0.993736	-4.82211	-3.78783	-7.29815	-8.73941	-4.96331	-2.42083	-7.28593	-2.49802	-4.528	-7.39977	-3.33053	-2.57912	-2.59915	-5.23544	-6.82815	-1.11197	-3.64761	-2.45258	-1.98601	-1.47399	32.6516
622	-2.76624	-0.120186	-2.64117	-0.729913	-4.30619	-3.37939	-9.90316	-7.22877	-7.78671	-3.69158	-5.24619	-0.753364	-5.26329	-3.78734	-7.19604	-8.7355	-4.81723	-2.36611	-7.19897	-2.34315	-4.44836	-7.02651	-3.4986	-1.76957	-2.78774	-5.98831	-6.61612	-1.28541	-3.18689	-4.20506	-2.08421	-1.22971	32.6355
624	-4.16695	-1.09927	-3.28265	-1.37188	-4.2373	-4.21825	-10.1323	-8.18147	-8.23179	-4.99702	-5.44894	-1.47204	-6.15882	-4.37703	-7.20337	-9.83477	-5.23983	-2.7809	-7.82971	-2.67586	-4.84654	-7.10956	-4.5534	-1.45494	-3.48589	-6.88873	-7.43886	-2.00848	-3.85867	-5.72449	-2.95043	-0.948789	33.8647
626	-4.95891	-1.53409	-3.93293	-1.57952	-4.76837	-4.42882	-10.4245	-8.86937	-7.32013	-6.32005	-4.83042	-2.01337	-7.15109	-4.50455	-7.37339	-10.7152	-5.50952	-2.93284	-8.14678	-2.81901	-5.08007	-7.4584	-5.16802	-2.22638	-3.60217	-6.42411	-8.32804	-2.25911	-3.82984	-5.5061	-3.25285	-0.867199	34.2321
628	-4.93937	-1.42318	-4.46888	-1.47497	-5.3483	-4.26369	-10.4743	-8.72671	-5.70397	-5.35611	-4.1777	-1.60688	-7.06755	-4.27101	-7.71734	-10.5578	-5.58183	-3.03397	-7.84827	-2.81168	-5.07617	-7.76179	-5.03806	-3.41652	-3.39746	-5.33315	-8.5904	-2.33338	-2.40177	-4.64819	-2.94115	-0.687408	33.5814
630	-4.90077	-1.73293	-4.70779	-1.49598	-5.57303	-3.91681	-10.6717	-8.03295	-5.17388	-2.92356	-4.57099	-1.29616	-6.14612	-4.03699	-8.3769	-9.52746	-5.58183	-3.20693	-7.55513	-2.87128	-5.0063	-8.15069	-4.44739	-3.63149	-3.17859	-5.42891	-7.82677	-2.74865	-0.878924	-4.58467	-2.43206	-0.286298	33.1622
632	-5.32582	-2.5928	-4.77228	-1.34452	-6.06551	-3.2421	-11.3444	-7.42322	-6.37183	-1.43442	-5.31703	-1.27368	-5.52076	-4.4	-9.21673	-8.61629	-5.59697	-3.18689	-7.55269	-2.9348	-5.00581	-8.84054	-3.76877	-3.65103	-2.75159	-6.44316	-7.07146	-3.28754	-0.811014	-4.15474	-1.80915	0.0166111	33.2936
634	-6.15394	-3.1224	-5.07421	-1.32596	-6.93612	-3.06817	-12.0274	-7.6421	-7.73932	-2.34266	-5.95704	-1.42367	-6.26582	-5.81634	-9.81034	-8.76579	-5.89744	-3.25236	-7.85951	-3.1356	-5.25351	-9.45466	-3.76486	-4.45227	-2.70224	-7.67972	-7.33528	-3.6139	-1.99676	-4.03406	-2.18046	-0.019054	32.8041
636	-6.40652	-2.67146	-5.1387	-1.63229	-7.1208	-3.52645	-12.1711	-8.25036	-7.49406	-4.51774	-6.21891	-1.91517	-7.11103	-6.749	-9.80154	-9.49424	-6.17103	-3.36131	-8.18489	-3.28949	-5.43282	-9.44392	-4.24024	-4.8485	-3.11214	-8.29531	-7.45498	-3.41114	-2.75452	-4.6731	-3.13999	-0.288252	30.9578
638	-5.72889	-1.82576	-4.79427	-1.71143	-6.56384	-3.759	-11.811	-8.46288	-6.32102	-5.96877	-6.31467	-1.86338	-6.64885	-6.62735	-9.31494	-9.90854	-6.06111	-3.28265	-8.18587	-3.21328	-5.34585	-9.00763	-4.44055	-4.26906	-3.25725	-7.29326	-7.19946	-2.83464	-2.71055	-5.16313	-3.29096	-0.444103	28.8521
640	-5.20417	-1.59369	-4.91885	-1.65769	-6.39773	-3.8699	-11.5325	-8.54594	-5.62922	-6.37623	-7.08758	-1.24241	-6.11094	-6.29318	-8.92457	-10.1968	-6.06404	-3.31685	-8.14727	-3.37255	-5.35074	-8.8635	-4.54168	-4.09709	-3.30317	-6.58338	-7.71734	-2.58157	-2.65632	-5.12453	-2.95238	-0.308283	27.4216
642	-4.94816	-1.62447	-5.27794	-1.50673	-6.61612	-3.5924	-11.2501	-8.12577	-5.01412	-4.82163	-7.61669	-0.901398	-6.7236	-5.54079	-8.61825	-9.79128	-6.26533	-3.43997	-7.81993	-3.68963	-5.24277	-8.79706	-4.10441	-4.62425	-3.20693	-7.58298	-8.0051	-2.52685	-1.80719	-4.90468	-2.79018	0.0136798	25.9691
644	-3.99547	-0.754829	-4.57979	-0.871107	-5.70739	-2.60208	-10.3443	-6.65667	-4.55829	-1.23704	-6.97374	-0.497845	-8.01682	-4.16988	-8.07301	-8.08278	-5.86177	-2.99049	-6.78418	-3.32076	-4.43566	-7.76082	-2.80142	-3.99351	-2.51756	-8.30556	-7.00745	-1.84335	-0.102598	-5.11769	-1.93569	0.225227	24.0661
646	-3.18103	0.132401	-3.47612	-0.367888	-4.05654	-1.98161	-9.47812	-5.61212	-5.58134	0.17686	-5.89939	-0.126538	-8.66173	-2.96216	-7.4325	-6.92489	-5.18121	-2.392	-5.98147	-2.69051	-3.60462	-6.39333	-1.95718	-2.3793	-1.94204	-7.753	-5.92969	-1.14519	-0.134355	-5.25645	-0.542793	0.211059	23.0142
648	-3.81567	-0.613635	-3.61683	-1.05383	-3.63051	-2.35731	-9.43317	-6.15198	-7.36166	-2.81705	-5.55398	-0.790006	-8.25915	-3.40479	-6.90486	-7.76521	-5.35856	-2.71055	-6.27754	-2.95483	-3.78489	-6.15442	-2.37881	-2.06809	-2.38125	-6.67816	-5.88181	-1.69776	-2.41399	-5.2882	-0.683988	0.157806	23.5995
650	-5.30823	-2.29771	-5.2286	-2.57375	-5.15776	-3.23038	-10.2369	-7.4115	-8.09939	-6.087	-6.3606	-2.5117	-7.92449	-5.86471	-7.07536	-9.36965	-6.46026	-3.99498	-7.29571	-4.24903	-4.87683	-7.39928	-3.34763	-3.89482	-3.58361	-6.15589	-6.70455	-3.08674	-4.04237	-5.58378	-3.04179	-0.120675	24.3343
652	-6.24969	-3.07404	-6.59315	-3.38183	-6.76268	-3.68132	-10.7674	-7.68705	-6.86577	-5.20905	-6.9327	-3.9212	-7.08416	-7.56246	-7.25467	-9.60905	-7.20093	-5.02096	-7.61181	-5.25889	-5.50903	-8.5049	-3.61243	-5.70592	-4.36677	-5.76944	-7.18773	-3.83082	-2.80288	-5.54177	-4.88514	-0.620475	23.6176
654	-5.84223	-2.60697	-5.959	-2.42718	-6.05769	-2.67146	-9.62224	-6.19937	-4.4083	-1.59662	-6.493	-3.80395	-5.15922	-5.95265	-6.07967	-7.97334	-6.38356	-4.45178	-6.22185	-4.60763	-4.50406	-7.6333	-2.39787	-4.78449	-3.49371	-4.76544	-6.32542	-3.37792	0.0923385	-4.77033	-3.75412	-0.782677	22.191
656	-5.18902	-2.63042	-4.62815	-1.39827	-4.71316	-1.61421	-8.09206	-4.67457	-2.75647	-0.0708416	-5.58085	-3.0413	-4.14399	-3.6437	-4.70974	-6.52915	-5.23104	-3.44486	-4.70584	-3.55185	-3.23038	-6.30295	-1.16424	-3.13755	-2.44868	-4.63451	-5.64632	-2.9944	1.54142	-3.56895	-2.53808	-0.674705	22.001
658	-5.61945	-3.59778	-4.78743	-2.26009	-4.96819	-2.55421	-7.83948	-4.98529	-2.28452	-2.58157	-4.77326	-3.03055	-4.58516	-4.37361	-4.18405	-7.11787	-5.4636	-3.8318	-4.70486	-3.98911	-3.43166	-6.29708	-1.63473	-3.68425	-3.49518	-5.30286	-6.74656	-3.64321	0.585298	-2.7169	-4.3316	-0.765578	22.0635
660	-6.38014	-3.88554	-5.72742	-3.51228	-5.83979	-3.67546	-8.2914	-5.96828	-2.54297	-6.17055	-5.06346	-3.51179	-4.84214	-6.48078	-4.07999	-8.46777	-6.28487	-4.77814	-5.4123	-4.9848	-4.24561	-6.96641	-2.49314	-5.05711	-4.92227	-5.08447	-7.76277	-4.20017	-1.26929	-2.83659	-6.42997	-1.18721	20.6017
662	-6.48909	-3.36571	-6.09335	-3.56846	-6.22917	-3.51277	-8.74234	-5.96095	-3.66764	-7.02749	-6.12511	-3.72969	-4.49038	-7.31232	-4.53924	-8.72182	-6.4842	-5.04099	-5.65365	-5.22713	-4.48159	-7.42762	-2.38223	-5.57499	-4.99555	-4.34332	-7.39782	-3.98667	-2.32458	-3.57579	-6.39431	-1.48767	18.8658
664	-6.322	-2.98023	-5.82464	-3.11166	-6.01421	-3.24943	-9.01105	-5.48656	-5.04636	-5.9673	-6.88971	-3.59924	-3.9129	-7.09735	-5.35513	-8.10721	-6.27803	-4.8441	-5.50854	-4.98432	-4.28372	-7.34554	-2.06955	-5.07617	-4.66626	-3.91094	-6.97374	-3.70575	-2.65534	-4.43371	-5.49682	-1.2771	18.0387
666	-6.25653	-2.86005	-5.36784	-2.85369	-5.39471	-3.01639	-9.02717	-5.05516	-6.06453	-5.29406	-7.08416	-3.33102	-3.06866	-5.8393	-5.89158	-7.26786	-6.08407	-4.57734	-5.25889	-4.7029	-3.95247	-6.93515	-1.80524	-4.09709	-4.35944	-3.54403	-6.85893	-3.62465	-3.09602	-4.57001	-4.56073	-0.923872	17.343
668	-5.77188	-2.71836	-5.15092	-2.79409	-4.90175	-2.45894	-8.72426	-4.41465	-6.31321	-4.54901	-6.47639	-3.14537	-2.64606	-4.3526	-5.88034	-6.51889	-5.88523	-4.39071	-4.81674	-4.49917	-3.5582	-6.58924	-1.29274	-3.54159	-3.96175	-3.26604	-6.74656	-3.45805	-2.95727	-3.72334	-3.32174	-1.02256	16.2647
670	-4.91396	-2.57228	-5.23837	-2.88692	-4.74394	-2.17801	-8.1419	-3.83717	-5.52613	-3.21719	-5.62385	-3.35447	-3.33688	-4.19284	-5.39422	-6.21012	-5.68882	-4.37312	-4.21678	-4.44445	-3.20497	-6.25409	-0.92778	-3.69207	-3.91094	-3.7165	-6.71627	-3.26653	-1.74319	-3.4771	-3.06573	-1.37237	15.5505
672	-4.69606	-2.67537	-5.26573	-3.01981	-4.49868	-2.26986	-7.37827	-3.47173	-3.93537	-1.40853	-5.63264	-3.8699	-4.03651	-5.07372	-4.71268	-5.97317	-5.44698	-4.26027	-3.51912	-4.34088	-2.76184	-5.68882	-0.696202	-3.79027	-4.09318	-4.43077	-6.41874	-3.32125	0.0127025	-4.05947	-4.06386	-1.43882	15.526
674	-4.78352	-2.80728	-4.88465	-3.00661	-4.20408	-2.22003	-7.00208	-3.30952	-2.72618	-0.299489	-5.78263	-4.35651	-4.14545	-6.06941	-4.43713	-5.84712	-5.26231	-3.9427	-3.1356	-4.08243	-2.42327	-5.33071	-0.466577	-3.48736	-3.87088	-4.62815	-6.01958	-3.30024	1.13689	-3.7463	-5.07763	-1.47155	14.7844
676	-4.50748	-2.7638	-4.34137	-2.91916	-3.82984	-2.1702	-7.13448	-3.65787	-2.63091	-1.17597	-5.19684	-4.61985	-4.44885	-6.66399	-4.67945	-6.34789	-5.2926	-3.74728	-3.32907	-3.93782	-2.46822	-5.15971	-0.673728	-3.04423	-3.567	-4.44006	-5.91796	-2.99293	0.9483	-2.55274	-5.85396	-1.70264	13.0217
678	-4.55927	-2.93675	-3.98911	-2.86249	-2.99245	-2.46089	-6.92538	-4.06728	-2.78432	-2.47994	-4.34772	-4.45471	-4.65063	-6.0699	-4.75762	-6.75291	-5.1773	-3.68865	-3.38818	-3.78831	-2.43353	-4.46742	-1.09975	-2.40764	-3.78685	-3.85916	-5.54421	-2.90744	0.414301	-1.50917	-5.72742	-1.75394	12.2663
680	-4.7757	-3.27923	-3.85964	-2.78823	-2.54932	-2.80728	-6.76757	-4.35407	-3.56846	-3.1996	-3.79173	-4.23437	-4.53435	-4.97357	-4.80746	-6.85258	-5.02145	-3.61243	-3.37206	-3.63344	-2.28012	-3.98569	-1.34746	-2.01141	-4.101	-3.33884	-5.07812	-3.06671	-0.428958	-1.20284	-5.23348	-1.53506	12.3553
682	-4.98383	-3.82007	-4.2759	-2.95874	-3.28949	-3.11898	-7.51702	-5.13626	-5.4719	-4.18942	-4.20213	-4.64867	-4.06924	-5.019	-5.40643	-7.46817	-5.55545	-3.91339	-4.10441	-3.9896	-2.72423	-4.7117	-1.8668	-2.47555	-4.25978	-3.32809	-5.40643	-3.52058	-1.93324	-1.93764	-5.39813	-1.43198	11.9527
684	-5.50806	-4.31889	-4.9379	-3.36424	-4.2163	-3.3618	-8.21225	-5.88229	-6.13244	-4.08341	-4.92031	-5.23886	-3.2167	-5.58134	-5.62287	-8.01438	-6.38649	-4.45667	-4.81185	-4.6135	-3.44046	-5.69762	-2.46382	-3.12631	-4.33111	-3.18885	-5.96877	-4.09513	-1.99676	-2.2894	-5.28185	-1.57757	11.4837
686	-5.92675	-4.11663	-5.07421	-3.49909	-4.18649	-3.55185	-7.71196	-5.94483	-4.28176	-2.48336	-4.98432	-5.03366	-2.61332	-5.94337	-4.42247	-7.92937	-6.58289	-4.59347	-4.65405	-4.75029	-3.54159	-5.63117	-2.72471	-3.12338	-4.24463	-2.34803	-6.3264	-4.0795	-0.157317	-1.57952	-4.5495	-1.68945	10.9858
688	-6.28047	-3.86258	-5.02682	-3.58361	-3.57726	-4.05018	-6.64543	-5.91649	-1.79986	-1.65623	-4.7757	-4.24121	-2.46236	-6.85991	-2.78334	-7.77792	-6.34887	-4.48305	-4.27834	-4.53337	-3.31392	-4.90761	-3.08527	-2.8195	-4.54998	-1.57757	-7.20288	-3.91778	1.21212	-1.73879	-3.9642	-1.59271	10.9262
690	-6.39089	-3.88163	-5.0747	-3.98081	-3.35301	-4.74736	-6.37232	-6.19791	-0.741638	-1.99724	-5.06004	-3.88652	-2.82682	-8.01145	-2.44281	-7.82922	-6.27168	-4.50992	-4.43224	-4.49771	-3.41017	-4.69264	-3.60413	-2.67683	-5.35318	-1.84286	-8.46581	-3.94954	1.16571	-3.55038	-4.06533	-1.56047	10.785
692	-5.81096	-3.63491	-5.01363	-4.32622	-4.02918	-5.12844	-7.30401	-6.728	-1.77202	-2.7296	-5.69029	-4.47181	-3.24454	-8.18342	-3.60217	-7.91765	-6.64054	-4.64525	-5.13382	-4.76446	-3.96078	-5.4377	-4.04872	-3.0242	-5.75527	-2.89913	-8.85324	-3.83864	0.0576503	-4.76251	-5.25547	-1.65036	9.03157
694	-5.45676	-3.52645	-5.04588	-4.38045	-5.03268	-5.22957	-8.5347	-7.25125	-3.62318	-3.47124	-5.55838	-4.998	-3.38232	-7.52973	-5.07763	-7.88491	-7.12373	-4.78059	-5.9331	-5.08545	-4.61008	-6.50717	-4.3868	-3.59875	-5.70885	-4.54998	-8.06324	-3.85769	-1.23948	-3.92072	-6.19742	-1.4867	7.73639
696	-6.01812	-3.85525	-5.64046	-4.46253	-5.86226	-5.62678	-9.40727	-7.81847	-4.94865	-3.84596	-5.21589	-4.91396	-4.2632	-7.34896	-6.00346	-8.19173	-7.52631	-5.09962	-6.71334	-5.42549	-5.17339	-7.37046	-4.86853	-4.39658	-5.95802	-6.16566	-7.51409	-4.18894	-1.8839	-2.62016	-5.79924	-1.21701	8.09597
698	-6.84476	-4.31645	-6.77294	-4.92862	-7.01723	-6.5526	-10.4118	-9.01545	-6.79688	-4.85973	-5.90526	-4.76691	-6.4803	-7.94452	-6.91805	-9.41314	-8.28651	-5.85542	-7.90104	-6.14758	-6.06355	-8.3295	-5.88571	-5.87301	-6.75682	-6.72458	-8.37445	-4.68874	-3.01345	-2.81705	-5.38445	-1.21554	8.28114
700	-7.04654	-4.62962	-7.28203	-5.39373	-7.7315	-7.4325	-11.5843	-10.4249	-9.53625	-6.85356	-7.0783	-4.60421	-7.97823	-7.91129	-8.19124	-10.5891	-9.09606	-6.40115	-9.25191	-6.82131	-7.04605	-9.11756	-6.99719	-6.72604	-7.47647	-6.29024	-9.28171	-4.94572	-5.1558	-4.14887	-5.44845	-1.37579	7.46328
702	-6.69771	-4.64819	-6.7319	-5.45724	-7.22731	-7.61425	-12.2659	-11.0273	-11.2208	-8.20248	-7.66506	-4.65649	-7.01967	-6.97374	-9.05893	-10.7274	-9.35793	-6.34594	-9.99453	-6.92977	-7.52875	-9.2353	-7.41492	-6.08065	-7.47941	-5.70201	-8.83175	-4.81869	-6.6254	-5.21687	-5.74843	-1.47253	6.0357
704	-6.46515	-4.58028	-5.87887	-5.03904	-6.33373	-7.02895	-12.2087	-10.6639	-10.5622	-7.99826	-7.49455	-4.92471	-5.05369	-6.73826	-8.95438	-10.2046	-9.01154	-5.94483	-9.84503	-6.5057	-7.31281	-8.92067	-6.97423	-4.82407	-6.80714	-5.19733	-8.10281	-4.68434	-6.26679	-5.00874	-6.43046	-1.41146	5.31361
706	-6.10703	-4.18942	-5.42109	-4.32867	-6.17543	-6.13781	-11.9571	-9.86701	-8.49171	-6.74265	-6.83646	-4.77765	-4.29056	-7.4667	-8.60163	-9.54065	-8.43064	-5.40741	-9.22651	-5.95656	-6.77246	-8.87034	-6.11534	-4.3956	-6.02593	-5.24277	-7.85658	-4.46595	-4.63011	-3.93635	-6.74216	-1.32449	5.2413
708	-5.51538	-3.68572	-5.54421	-4.03992	-6.66595	-5.68736	-11.8213	-9.5001	-6.62686	-5.45089	-5.97414	-4.28323	-4.86315	-8.15362	-8.46581	-9.18254	-8.27821	-5.17779	-8.9407	-5.79435	-6.58827	-9.01789	-5.69078	-4.94279	-5.82367	-6.2707	-7.75153	-4.10148	-3.05596	-3.37548	-5.95216	-1.42953	4.82358
710	-5.44405	-3.71698	-5.44357	-3.96615	-6.23797	-5.51001	-11.2521	-9.5172	-5.23935	-4.74932	-5.31605	-3.9173	-5.28967	-7.55464	-7.71147	-9.18693	-8.24498	-5.08105	-8.78973	-5.66635	-6.53257	-8.42673	-5.58769	-4.59151	-5.6771	-6.54039	-7.5097	-3.93733	-1.94155	-2.88154	-4.77521	-1.49256	4.9809
712	-5.99857	-4.1435	-5.41523	-3.82154	-5.67954	-5.55398	-11.2101	-9.72728	-5.51783	-5.06102	-5.46457	-4.00817	-5.19831	-5.80217	-7.37436	-9.42193	-8.32267	-5.09571	-8.84396	-5.64827	-6.68061	-8.17268	-5.67124	-4.01452	-5.5149	-6.25165	-7.07732	-4.15962	-2.22931	-2.81363	-4.24708	-1.22336	5.60333
714	-6.72067	-4.60763	-6.19302	-4.0878	-6.68158	-6.41727	-12.6196	-10.4279	-8.1546	-6.29611	-6.26386	-4.40195	-4.8954	-4.74443	-8.64658	-10.1049	-9.09948	-5.62482	-9.78982	-6.23455	-7.57956	-9.50059	-6.41287	-4.83042	-6.08847	-6.88531	-7.16282	-4.70046	-4.37752	-3.90117	-4.186	-0.857428	5.44894
716	-7.07048	-4.56073	-6.81496	-4.2246	-7.82629	-6.98889	-13.6436	-10.8441	-9.91196	-7.12471	-6.80714	-4.12249	-5.01265	-4.88465	-9.60954	-10.7435	-9.64472	-5.93946	-10.5456	-6.6767	-8.19613	-10.6516	-6.9327	-5.74794	-6.5184	-7.24685	-7.65431	-4.90126	-5.71618	-5.43819	-3.77561	-0.687896	4.66773
718	-6.80519	-3.93146	-6.47883	-3.57237	-7.21705	-6.1642	-12.7715	-10.1694	-8.46386	-6.9156	-6.57361	-3.27142	-5.79875	-5.45041	-8.74087	-10.4973	-9.00274	-5.39031	-9.82939	-6.17201	-7.5268	-9.86457	-6.18374	-5.42011	-5.78458	-6.26386	-7.39391	-4.45569	-4.6902	-6.07528	-3.13804	-0.6322	3.9769
720	-6.39968	-3.49909	-5.7753	-2.85272	-5.89597	-4.95207	-11.4724	-9.16543	-6.92635	-6.56921	-5.97268	-3.02811	-6.65618	-5.70006	-7.65138	-9.7864	-8.03686	-4.62425	-8.78533	-5.34488	-6.48274	-8.37738	-5.01314	-4.49624	-4.76349	-5.07275	-6.52769	-3.97983	-3.79467	-4.84312	-3.36669	-0.572107	3.79222
722	-6.0401	-3.32858	-5.61212	-2.76136	-6.01763	-4.68727	-12.0353	-9.0174	-8.87083	-6.90632	-5.87008	-3.20448	-7.47159	-5.19098	-8.52835	-9.68038	-8.02806	-4.44055	-9.04867	-5.24667	-6.50619	-8.51125	-4.73613	-4.42833	-4.50162	-5.12649	-6.36646	-3.79271	-5.11965	-3.96322	-4.01794	-0.558916	3.44192
724	-6.01274	-3.32809	-6.10654	-3.08576	-7.24245	-5.10059	-13.7853	-9.52599	-11.9107	-7.41198	-6.41825	-3.02567	-7.42029	-4.07217	-10.6033	-10.2432	-8.79071	-4.84898	-10.0439	-5.81536	-7.31574	-9.93492	-5.10939	-5.13235	-4.85338	-6.21012	-7.02162	-3.86551	-6.84818	-4.4811	-3.60462	-0.433355	3.1395
726	-6.36157	-3.33395	-6.54039	-3.43069	-7.89078	-5.39373	-14.5167	-9.95251	-12.0797	-7.66701	-7.13937	-2.82487	-6.37965	-3.53964	-11.3972	-10.9692	-9.29686	-5.29944	-10.5251	-6.24969	-7.82971	-10.742	-5.39569	-5.3395	-5.24325	-7.00159	-7.93963	-3.96615	-6.94687	-5.0107	-3.01248	-0.327337	2.95825
728	-6.2795	-2.78188	-6.2966	-3.19373	-7.66017	-5.03268	-13.97	-9.81864	-10.0023	-7.77254	-7.20728	-2.81021	-5.69859	-4.04041	-10.8705	-11.1852	-8.99932	-5.18218	-10.2212	-6.03863	-7.61962	-10.5295	-5.11427	-4.93155	-4.88172	-7.20288	-8.37592	-3.59484	-5.84809	-5.16215	-2.72569	-0.518365	1.85165
730	-5.81243	-2.28647	-6.01274	-2.64557	-7.73834	-4.229	-13.7394	-9.33936	-9.32813	-7.67581	-6.23406	-2.63286	-5.78996	-5.02389	-11.106	-10.7821	-8.53226	-4.79133	-9.85529	-5.62336	-7.23219	-10.4948	-4.48696	-5.07226	-4.07657	-7.85364	-8.45849	-3.13657	-5.36442	-4.47279	-2.05538	-0.672262	0.859871
732	-5.96926	-3.02371	-6.40945	-2.88008	-8.68616	-4.04188	-14.5948	-9.33985	-11.3566	-7.40905	-5.84223	-2.76087	-6.45978	-6.2023	-12.3645	-10.6272	-8.75553	-4.9379	-10.1904	-5.78507	-7.41492	-11.2408	-4.40977	-6.01812	-4.13324	-8.56988	-9.15322	-3.59289	-6.13097	-4.04334	-2.44428	-0.728447	1.6274
734	-6.51156	-4.40342	-6.5228	-3.31197	-8.97001	-3.99156	-14.9016	-9.28953	-12.8472	-6.5184	-6.58729	-3.42776	-6.9327	-6.32151	-12.5702	-10.4103	-8.83908	-5.17192	-10.3399	-5.91698	-7.46328	-11.4822	-4.30815	-6.17934	-4.42247	-8.06373	-9.34376	-4.39706	-6.14074	-4.65405	-4.02771	-0.742615	3.71845
736	-6.49398	-5.00435	-5.55984	-2.88447	-7.72711	-3.37548	-13.6827	-8.76433	-11.6552	-5.82464	-6.44854	-3.51912	-6.90779	-4.79036	-11.1939	-9.9955	-8.04223	-4.71414	-9.63299	-5.23886	-6.76317	-10.3038	-3.60755	-4.88758	-3.88554	-7.16428	-8.09402	-4.35456	-5.1304	-4.57539	-4.33941	-0.753852	5.24961
738	-6.22869	-4.86511	-4.74248	-2.35536	-6.50081	-3.08869	-12.582	-8.86839	-10.0155	-6.84867	-5.56522	-3.06524	-6.84037	-3.31783	-10.1841	-10.3908	-7.46231	-4.26613	-9.16202	-4.6218	-6.36646	-9.09557	-3.4043	-3.76047	-3.332	-7.11445	-7.10712	-3.95296	-5.1045	-4.01794	-2.87959	-0.7817	5.05614
740	-5.7626	-4.02576	-4.84019	-2.2894	-6.5013	-3.73262	-12.8384	-10.0551	-10.0155	-9.34767	-5.3781	-3.04423	-6.53306	-3.41114	-10.5368	-11.6625	-7.71294	-4.31205	-9.64911	-4.75225	-6.82815	-9.16543	-4.33941	-3.83766	-3.48443	-7.48234	-7.40026	-3.52742	-6.30734	-4.66822	-2.05294	-0.579435	3.00808
742	-5.21736	-2.74084	-5.03708	-2.30895	-6.75291	-4.61887	-13.3568	-11.0342	-10.3878	-10.8016	-5.63948	-2.88887	-6.93319	-4.10246	-11.062	-12.4583	-8.03099	-4.40244	-10.1685	-5.0107	-7.31378	-9.62517	-5.38787	-4.00377	-3.99644	-7.65187	-7.65724	-3.09749	-6.76952	-5.57645	-2.53808	-0.229136	0.456317
744	-5.48363	-2.46578	-5.00386	-2.17313	-6.35473	-4.72489	-12.7784	-10.5828	-8.97196	-8.92067	-6.08163	-2.32702	-8.48682	-4.01452	-10.3844	-11.8349	-7.78573	-4.31792	-9.57241	-4.84996	-6.92293	-9.21478	-5.32338	-3.69891	-4.13519	-7.11885	-7.11934	-3.16735	-4.75127	-5.73719	-2.52343	-0.101132	-0.0229625
746	-6.45147	-3.38721	-5.05711	-2.21954	-5.68687	-4.35798	-11.577	-9.47372	-6.58192	-5.7113	-7.13741	-2.16629	-9.23823	-4.27785	-9.01007	-10.7577	-7.29913	-4.25196	-8.46142	-4.4723	-6.12022	-8.32169	-4.66187	-3.32369	-4.00768	-6.43681	-6.70015	-3.74434	-1.92933	-6.33177	-2.27084	-0.252098	1.33866
748	-6.92586	-3.84499	-5.41181	-2.44428	-5.89988	-4.24659	-11.0826	-9.01447	-5.30823	-4.43029	-7.89664	-2.45698	-8.12626	-5.92969	-8.28505	-10.2925	-7.17308	-4.28518	-8.07594	-4.4596	-5.93946	-8.25182	-4.43664	-3.68083	-4.08536	-6.69722	-6.86577	-4.01696	-0.946346	-6.29806	-3.61878	-0.520808	1.49647
750	-6.17788	-2.9861	-6.00297	-2.39347	-7.55611	-4.44299	-11.7861	-9.45076	-5.96682	-5.46897	-7.13253	-2.68905	-6.62149	-7.55074	-8.6329	-10.6155	-7.66115	-4.37703	-8.6246	-4.88318	-6.56824	-9.46297	-4.8314	-5.38152	-4.17184	-7.33479	-7.47208	-3.43948	-2.17313	-5.06884	-5.44454	-0.794403	-0.265778
752	-5.05711	-2.09349	-6.19546	-2.37637	-8.95584	-5.05662	-12.9679	-10.3771	-8.05005	-7.10175	-6.20719	-2.7467	-6.15442	-7.99972	-9.57045	-11.4475	-8.42526	-4.59347	-9.54651	-5.43086	-7.46035	-10.7117	-5.63068	-6.6508	-4.41807	-7.46524	-8.45311	-2.71543	-4.22704	-4.72147	-5.57743	-1.17108	-2.10424
754	-4.54852	-1.79596	-5.78214	-2.43939	-8.74869	-5.45627	-13.1848	-10.6595	-8.98907	-6.62247	-6.16908	-2.72862	-6.09482	-7.96992	-9.64862	-11.7421	-8.60359	-4.66138	-9.68282	-5.58232	-7.66848	-10.7083	-5.97659	-6.20914	-4.64281	-7.01332	-9.10974	-2.35145	-4.41221	-4.6902	-4.5363	-1.44224	-3.30904
756	-4.78645	-1.69678	-5.16411	-2.35389	-7.42615	-4.78987	-11.8647	-9.83867	-7.56002	-4.31792	-6.29855	-2.91281	-5.93555	-8.44627	-8.21323	-11.0865	-7.92497	-4.34381	-8.66466	-5.12111	-6.75194	-9.3677	-5.25938	-5.06151	-4.42149	-6.18667	-8.83419	-2.26058	-2.53613	-3.9085	-4.25782	-1.26293	-3.45267
758	-5.55398	-2.00262	-4.87146	-2.39884	-6.09238	-3.97006	-10.4303	-8.99542	-6.14172	-3.29389	-6.31516	-3.15953	-6.26142	-9.06772	-6.85405	-10.3776	-7.15402	-4.10393	-7.5781	-4.58809	-5.68052	-8.03881	-4.37606	-4.19382	-4.23242	-5.53102	-8.11649	-2.57815	-1.45543	-3.82496	-4.72782	-0.84961	-1.95083
760	-6.43242	-2.92014	-5.02878	-2.57082	-5.53053	-3.92072	-10.0585	-8.91285	-6.05964	-4.39657	-6.49739	-3.14683	-6.93612	-8.63974	-6.63224	-10.3424	-6.96397	-4.23877	-7.26444	-4.46449	-5.36686	-7.68998	-4.26173	-3.8274	-4.27834	-5.54616	-7.75691	-3.3022	-2.07883	-5.32533	-4.40293	-0.609238	-0.0229626
762	-7.04263	-3.86013	-5.39471	-2.84685	-5.59258	-4.31352	-10.123	-9.31884	-5.80412	-6.21207	-6.88678	-3.25285	-6.8985	-7.21607	-6.6298	-10.8774	-7.23366	-4.56513	-7.50286	-4.65405	-5.57059	-7.78867	-4.73906	-3.88065	-4.36482	-5.81145	-8.11161	-3.98374	-2.80386	-6.50179	-3.77806	-0.662491	0.648323
764	-7.06315	-3.97348	-5.84321	-3.07355	-5.91356	-4.63793	-9.79177	-9.56899	-4.68141	-6.98645	-7.01429	-3.52742	-6.28389	-5.7582	-6.07039	-11.3469	-7.42176	-4.71365	-7.50921	-4.82944	-5.60137	-7.74909	-5.06493	-4.39022	-4.45423	-5.44015	-8.45164	-4.07657	-2.41057	-5.72742	-3.73408	-0.666888	-0.118721
766	-6.9156	-3.95345	-6.31663	-3.10628	-6.44219	-4.8739	-9.42975	-9.64911	-4.00035	-6.81643	-7.04019	-3.72187	-6.83548	-5.67954	-5.63459	-11.6337	-7.43348	-4.83921	-7.24685	-4.99653	-5.43086	-7.73981	-5.27745	-5.18072	-4.61105	-5.44308	-8.45555	-4.1391	-1.80622	-5.08545	-4.23535	-0.34346	-0.450455
768	-6.70064	-4.11125	-6.56335	-3.08918	-6.75438	-5.04832	-9.53723	-9.65888	-4.51872	-6.11094	-7.22193	-3.60413	-8.33244	-7.14718	-6.01518	-11.5237	-7.39977	-5.02291	-7.0783	-5.10548	-5.35514	-7.85853	-5.45676	-5.53688	-4.8485	-6.73044	-8.52151	-4.32622	-1.7344	-6.03717	-4.67212	-0.10211	-0.103087
770	-5.70592	-3.11703	-5.95314	-2.47017	-6.11094	-4.50259	-9.36379	-8.87718	-5.24228	-4.15425	-6.89655	-2.7892	-8.35247	-7.59617	-6.2536	-10.4054	-6.8946	-4.5666	-6.55309	-4.57295	-4.8998	-7.40954	-4.79671	-4.78791	-4.46204	-6.98156	-8.24108	-3.52645	-1.39289	-6.43877	-4.2334	-0.354697	-1.27857
772	-5.25449	-2.25179	-5.10548	-1.63864	-5.31458	-3.67253	-8.80146	-7.9196	-5.26426	-2.44135	-6.65422	-2.13893	-7.05533	-5.82171	-6.00639	-9.44245	-6.15442	-3.81519	-5.85054	-3.78734	-4.21483	-6.79639	-3.91192	-3.79467	-3.59484	-6.07528	-7.95136	-2.74914	-0.914101	-5.24423	-3.49176	-0.681545	-2.49216
774	-6.2878	-3.01345	-5.17632	-1.82576	-5.4636	-3.83864	-8.82051	-8.04809	-4.75567	-2.72374	-7.26639	-2.8063	-6.70699	-4.03211	-5.98196	-9.74243	-6.13537	-3.83522	-5.92089	-3.7507	-4.21532	-7.02993	-4.16695	-3.75118	-3.53084	-5.88425	-8.33537	-3.32125	-0.853519	-4.51578	-3.31197	-0.591161	-2.23762
776	-6.77978	-3.5841	-5.47728	-2.40764	-5.56864	-4.32476	-8.97392	-8.52151	-4.10344	-3.83375	-7.65138	-3.76975	-7.75886	-4.0966	-5.6771	-10.3385	-6.36402	-4.09171	-6.31565	-3.96859	-4.43175	-7.21167	-4.70926	-3.99253	-3.8401	-5.71276	-8.8464	-3.80346	-0.946834	-5.23593	-3.38965	-0.578458	-2.7809
778	-6.35767	-3.41896	-5.28283	-2.59524	-5.01705	-4.34821	-8.98418	-8.65391	-4.80941	-5.05467	-7.24294	-3.94465	-9.21576	-5.76309	-5.25791	-10.5359	-6.25604	-4.07608	-6.59706	-3.92414	-4.43273	-6.78956	-4.73515	-3.87235	-3.79857	-5.2159	-9.13172	-3.67692	-1.93422	-5.81585	-3.20204	-0.999599	-3.7165
780	-6.57166	-3.78783	-5.10548	-2.87666	-4.71512	-4.71072	-9.53479	-9.10779	-7.06901	-6.48176	-7.14034	-3.94661	-9.75562	-7.8683	-5.72742	-10.7948	-6.43437	-4.23779	-7.15598	-4.04823	-4.80404	-6.73679	-5.06688	-3.66227	-4.10393	-5.07763	-9.46248	-4.01892	-3.66862	-6.0616	-3.32613	-1.20235	-3.59729
782	-6.92928	-4.15425	-5.07372	-3.27142	-4.90908	-5.32338	-10.1904	-9.52062	-8.07887	-6.84085	-7.68265	-4.52458	-8.62313	-9.23286	-6.44756	-11.0361	-6.70796	-4.35896	-7.60985	-4.19089	-5.23641	-7.15549	-5.5916	-3.37353	-4.66626	-4.88465	-9.79666	-4.38632	-3.95638	-6.2536	-4.54363	-0.944392	-3.47466
784	-6.36304	-4.03895	-4.80892	-3.32223	-4.86462	-5.11721	-10.1953	-9.08336	-6.80665	-6.13586	-7.38511	-5.30677	-6.46026	-9.13857	-6.56531	-10.7362	-6.4075	-3.99742	-7.37632	-3.87381	-5.05125	-7.24294	-5.30726	-2.99538	-4.61252	-4.45423	-9.5812	-4.12933	-2.72276	-5.67124	-5.86324	-0.701576	-3.57237
786	-5.55447	-3.83913	-4.2202	-2.9729	-4.23779	-4.3785	-9.81425	-8.3085	-5.2755	-5.66	-6.08749	-5.20222	-5.04343	-8.08083	-6.48909	-10.2686	-5.87594	-3.50495	-6.84623	-3.28363	-4.54754	-6.79737	-4.57392	-2.50828	-4.07461	-4.52751	-9.1542	-3.68865	-1.80133	-4.6433	-5.63508	-0.747012	-3.46928
788	-5.532	-3.53084	-3.85134	-2.73595	-4.05116	-4.21776	-9.9271	-8.10477	-5.27013	-5.67124	-5.44112	-4.55145	-6.19693	-6.87701	-7.10028	-10.3321	-5.86568	-3.38134	-6.80617	-3.05205	-4.4894	-6.76171	-4.46302	-2.29673	-3.95345	-5.49242	-9.37991	-3.54061	-2.07541	-3.53133	-4.79231	-0.864756	-3.80151
790	-5.78849	-2.97926	-3.61439	-2.68807	-4.1606	-4.55976	-10.2432	-8.30654	-6.26093	-5.78018	-5.61847	-4.1049	-8.52688	-5.59453	-7.75007	-10.4733	-6.11876	-3.36424	-7.09784	-3.1185	-4.72049	-6.92928	-4.78938	-2.20195	-4.24024	-6.39284	-9.33839	-3.3833	-2.92649	-3.22403	-4.58223	-0.738218	-4.72342
792	-5.38738	-2.49069	-2.82585	-2.16482	-3.22696	-4.43126	-9.56361	-7.84974	-5.52125	-4.87732	-5.49731	-3.71112	-8.21665	-4.45765	-6.72849	-9.74536	-5.8007	-2.92307	-6.60097	-2.78188	-4.31108	-6.08945	-4.42198	-1.29567	-4.05556	-5.93213	-8.02171	-2.85956	-2.21417	-3.62758	-4.43761	-0.600444	-5.37859
794	-5.062	-2.78627	-2.59622	-1.72853	-3.0413	-4.06484	-8.86985	-7.17112	-3.40968	-3.48492	-4.8998	-3.70233	-6.14026	-4.40342	-5.17828	-9.0218	-5.65365	-2.7853	-5.93701	-2.6441	-3.94612	-5.78116	-3.81616	-1.09145	-3.64419	-5.35074	-6.96104	-2.734	-0.382545	-3.38183	-4.41661	-0.852053	-5.29455
796	-5.6131	-3.78099	-4.16548	-2.28843	-5.02096	-4.41319	-9.56313	-7.50774	-3.2807	-3.40479	-5.254	-4.11956	-5.41132	-5.61407	-5.25889	-9.39946	-6.56726	-3.70526	-6.48616	-3.60706	-4.67701	-7.30059	-4.11858	-2.95922	-4.02673	-5.52906	-7.47794	-3.50641	-0.273106	-3.47612	-4.79378	-1.23655	-5.00532
798	-6.17934	-4.32329	-5.84956	-3.05987	-6.52329	-4.99897	-10.5872	-8.07203	-4.46058	-3.65787	-6.57654	-4.4811	-6.04987	-6.9244	-6.32689	-9.62664	-7.46524	-4.65356	-7.32746	-4.63646	-5.489	-8.61629	-4.68532	-4.60177	-4.74639	-5.33608	-8.28456	-4.17623	-1.17744	-4.71854	-5.21687	-1.20186	-4.95793
800	-6.50081	-4.33551	-5.82709	-3.34812	-5.86666	-5.20026	-10.9116	-8.05689	-5.06297	-3.42824	-7.15549	-4.44885	-6.48567	-7.57223	-7.15109	-9.08482	-7.50872	-4.77521	-7.46182	-4.75665	-5.52906	-8.43601	-4.74492	-4.03406	-5.06297	-4.66968	-8.39106	-4.31205	-1.56438	-5.41621	-5.11183	-0.707439	-4.34821
802	-7.3856	-4.92373	-5.37712	-3.76389	-4.8099	-5.54812	-10.7963	-7.97188	-5.33266	-2.83122	-7.00257	-4.28274	-6.48127	-7.90299	-7.31769	-8.59431	-7.40612	-4.84703	-7.32893	-4.6858	-5.45382	-7.76668	-4.80208	-3.01297	-5.45969	-4.16646	-8.44627	-4.74101	-1.43686	-5.08838	-5.03024	-0.349322	-2.9519
804	-8.17072	-5.80999	-5.93408	-4.22167	-5.21052	-5.99271	-10.765	-7.96846	-5.38152	-1.71779	-6.81643	-4.6135	-6.67572	-7.66213	-7.03139	-8.18489	-7.71147	-5.29406	-7.34798	-5.03317	-5.69713	-7.80528	-4.98774	-3.6051	-5.9331	-4.5964	-8.56695	-5.37956	-0.810525	-5.11037	-5.34683	-0.500777	-2.29331
806	-7.51556	-5.56766	-6.3689	-4.03406	-6.33324	-5.83784	-11.0005	-7.94696	-5.44308	-1.1618	-6.32054	-5.00239	-6.30295	-6.81594	-6.89362	-7.98263	-8.09353	-5.43819	-7.52435	-5.29455	-5.95607	-8.48047	-4.93057	-4.55927	-5.83442	-5.43086	-8.63486	-5.14456	-0.575038	-4.75225	-4.65454	-0.982499	-3.38965
808	-6.04499	-4.31205	-5.6942	-3.65201	-6.91023	-5.6429	-11.5936	-8.34758	-6.3689	-2.47555	-5.35318	-4.98529	-5.74501	-6.74998	-7.48625	-8.59773	-8.33732	-5.14798	-8.00315	-5.24863	-6.30441	-9.25289	-5.0791	-4.34283	-5.62971	-5.54128	-8.90112	-4.09416	-1.57806	-3.69109	-4.21239	-1.32645	-5.08936
810	-5.53004	-3.62611	-5.38982	-3.85964	-7.25906	-6.22575	-12.7525	-9.41363	-8.32022	-5.45187	-4.97748	-4.74785	-6.83157	-7.27128	-8.79559	-9.85773	-8.76237	-5.24032	-8.95633	-5.52369	-7.04556	-10.1001	-5.83979	-4.18161	-6.10117	-5.8564	-8.71987	-3.52498	-3.67692	-4.186	-5.15971	-1.37775	-5.88816
812	-6.16908	-3.99547	-6.4886	-4.45032	-7.81407	-7.06266	-13.7467	-10.6018	-9.96277	-8.33341	-5.72498	-4.71023	-8.43308	-7.34652	-9.6755	-10.9599	-9.37161	-5.94972	-9.94567	-6.27656	-7.87905	-10.6766	-6.67621	-5.30335	-6.85014	-6.82766	-8.31534	-3.89824	-5.7753	-5.69811	-5.32826	-1.39143	-6.0699
814	-6.55798	-4.38387	-7.09246	-4.82456	-7.96504	-7.33919	-13.6842	-11.2589	-9.97205	-10.3219	-6.49495	-5.13235	-8.46826	-7.22877	-9.36184	-11.5599	-9.61589	-6.39089	-10.3419	-6.72555	-8.17952	-10.5124	-7.00648	-6.05085	-7.20434	-7.37241	-8.60163	-4.3487	-6.749	-5.99369	-5.18756	-1.34941	-6.27314
816	-6.18129	-4.09464	-6.28292	-4.74639	-7.6592	-6.94638	-12.9757	-11.1339	-8.53275	-11.277	-6.41971	-5.5188	-7.92253	-6.79786	-8.32902	-11.621	-9.40581	-6.12511	-10.0864	-6.50961	-7.89078	-10.167	-6.73337	-5.41132	-6.95909	-7.16624	-9.03597	-4.18356	-6.27998	-4.50357	-6.05231	-1.16718	-6.62296
818	-5.9292	-3.68474	-5.78996	-4.50357	-7.92839	-6.40017	-12.687	-10.6321	-7.44618	-11.1319	-6.10948	-5.38591	-8.30166	-6.53648	-7.62304	-11.3537	-9.36086	-5.90379	-9.75855	-6.34154	-7.74128	-10.3966	-6.24921	-5.24472	-6.51938	-6.61758	-9.04232	-3.95785	-5.35465	-3.05449	-6.21305	-1.09096	-6.93368
820	-6.1427	-3.69842	-6.3562	-4.61105	-8.8635	-6.30392	-13.3812	-10.4582	-8.11258	-10.1132	-6.24285	-5.14066	-8.53812	-7.32942	-8.24743	-11.2242	-9.75562	-6.19155	-9.99746	-6.73288	-8.16926	-11.1866	-6.0743	-6.19791	-6.57605	-6.13293	-8.95242	-4.16744	-5.10157	-3.9896	-5.86373	-1.15643	-6.91658
822	-6.65667	-4.17184	-7.20288	-5.02975	-9.89828	-6.67425	-14.715	-10.6702	-9.9061	-8.69495	-6.79933	-5.43135	-7.77205	-8.27625	-9.82744	-11.1915	-10.2862	-6.72213	-10.7445	-7.37143	-8.86937	-12.2595	-6.25946	-7.21998	-7.09637	-6.01812	-9.13026	-4.70877	-5.55887	-5.80315	-6.3904	-1.32059	-6.5013
824	-7.45351	-5.23886	-7.8854	-5.49682	-10.4401	-7.21314	-15.7136	-10.9941	-11.6268	-8.00559	-7.96748	-6.22722	-7.53706	-8.24352	-10.9409	-11.0259	-10.7523	-7.25711	-11.5501	-7.89957	-9.49522	-13.005	-6.71481	-7.59177	-7.625	-6.63468	-9.26608	-5.51685	-6.50863	-6.90925	-6.55602	-1.29469	-5.61603
826	-7.23366	-5.24081	-7.625	-5.14457	-9.76734	-6.78662	-15.506	-10.5652	-11.7959	-7.23024	-8.52151	-6.32005	-8.08229	-6.99231	-10.8461	-10.2178	-10.4225	-6.92049	-11.4524	-7.47989	-9.2568	-12.603	-6.39382	-6.85356	-7.19897	-7.27616	-8.43406	-5.35514	-6.4461	-7.28594	-5.59502	-0.823717	-5.54909
828	-6.29464	-4.02722	-6.7661	-4.1093	-8.72768	-5.31898	-14.6745	-9.51671	-10.6414	-5.50366	-7.66604	-5.45871	-8.68176	-5.41865	-10.3468	-9.13661	-9.48398	-5.97366	-10.594	-6.40555	-8.40084	-11.6908	-5.15238	-5.8266	-5.96242	-7.45009	-6.88092	-4.32476	-4.955	-6.35229	-4.32427	-0.45192	-6.35962
830	-6.38551	-4.15523	-6.69966	-4.07315	-8.821	-4.7371	-14.7253	-9.58169	-10.4245	-4.91494	-6.63126	-5.48802	-10.1059	-5.91943	-10.6717	-9.35304	-9.46834	-5.90819	-10.5774	-6.32151	-8.43992	-11.6244	-4.84117	-5.89011	-5.64974	-7.881	-6.29806	-4.4171	-4.34723	-4.51481	-4.87244	-0.695713	-6.59364
832	-6.93759	-5.32045	-6.75389	-4.76837	-9.10876	-5.3864	-15.4146	-10.6878	-11.4446	-6.27608	-6.6039	-6.08847	-11.7084	-7.42908	-11.639	-10.5691	-10.1313	-6.3093	-11.3649	-6.86431	-9.1967	-11.9962	-5.71179	-6.04792	-6.27021	-8.51907	-6.9415	-5.24814	-5.36686	-4.52947	-6.46613	-1.03429	-6.32347
834	-6.92147	-5.71472	-5.99027	-4.94719	-8.57916	-6.15442	-15.8641	-11.5887	-12.7744	-8.12919	-7.38169	-5.7411	-11.5516	-6.85502	-12.4178	-11.4739	-10.3302	-6.19791	-12.0113	-6.78809	-9.58511	-12.0719	-6.56628	-5.11281	-6.61416	-8.99639	-7.70659	-5.30823	-6.76317	-6.55749	-5.94776	-0.942437	-6.15882
836	-6.49251	-5.33999	-5.49633	-4.79475	-8.69984	-6.64396	-16.0405	-12.1124	-13.0979	-9.29393	-7.31818	-5.17095	-10.0566	-5.74061	-12.3963	-11.962	-10.2979	-6.00932	-12.4183	-6.48518	-9.6838	-12.3069	-7.01039	-4.89686	-6.72555	-8.99444	-8.21176	-4.77179	-7.28789	-6.46759	-5.17046	-0.8159	-5.98636
838	-6.62393	-5.16069	-5.9634	-4.65209	-9.62957	-6.70699	-15.7092	-12.1061	-11.3024	-9.04281	-6.71432	-5.0962	-9.63299	-5.78751	-11.5369	-11.8882	-10.253	-6.02544	-12.3606	-6.45489	-9.64276	-12.5844	-7.01576	-5.97805	-6.78076	-8.49317	-8.23472	-4.70046	-6.31712	-5.37419	-5.61261	-0.702553	-4.95793
840	-7.39146	-5.3864	-6.40408	-4.40293	-9.55287	-6.25653	-15.0028	-11.6542	-9.08775	-7.48673	-7.22096	-5.22957	-9.96424	-6.5653	-10.657	-11.1964	-9.99404	-5.94239	-11.9224	-6.32444	-9.37454	-12.1628	-6.65715	-6.19693	-6.48909	-7.65333	-8.05054	-5.1602	-4.6433	-6.43144	-5.45578	-0.48954	-3.92804
842	-7.79013	-5.50952	-6.59902	-4.08292	-9.05209	-5.72693	-15.099	-11.5609	-9.42486	-6.42802	-8.21909	-5.44552	-9.0472	-7.84485	-10.9365	-10.9648	-9.81522	-5.84174	-11.895	-6.16175	-9.32129	-11.8955	-6.50912	-5.83393	-5.96975	-7.09393	-8.59284	-5.43184	-4.26515	-7.07488	-5.51929	-0.310726	-4.3316
844	-7.27568	-5.13528	-6.33959	-3.75754	-8.92653	-5.5789	-16.0737	-11.984	-12.0289	-7.27421	-8.38471	-5.56717	-7.82042	-9.1625	-12.2727	-11.4578	-9.75562	-5.6473	-12.3499	-5.95607	-9.55531	-12.3176	-6.70064	-5.45627	-5.61945	-7.5009	-9.35793	-5.10304	-5.93555	-5.93066	-6.7661	-0.331734	-5.50659
846	-6.59999	-4.68287	-5.5745	-3.69744	-8.3979	-5.72742	-16.6062	-12.303	-13.7526	-8.46288	-7.82775	-5.74599	-8.03881	-10.0527	-13.2635	-11.7382	-9.60954	-5.33852	-12.5932	-5.61212	-9.50645	-12.4652	-6.81203	-4.55878	-5.65658	-8.66954	-9.42535	-4.61985	-7.34847	-5.3053	-7.96846	-0.770463	-6.26288
848	-6.83988	-4.86462	-5.34683	-3.9813	-7.93621	-5.69127	-16.319	-12.5385	-13.5161	-9.23774	-7.37632	-6.34301	-9.27487	-10.2696	-13.3202	-12.045	-9.54798	-5.32973	-12.518	-5.54568	-9.20208	-12.1496	-6.80714	-4.27541	-5.74403	-9.89584	-9.5001	-4.73368	-7.49748	-5.78067	-7.96943	-0.867687	-5.98245
850	-7.29864	-5.20417	-5.3781	-4.13275	-7.93133	-5.9033	-15.9061	-13.2088	-12.5815	-10.4587	-7.10272	-6.43926	-10.0937	-9.49424	-12.9117	-13.2435	-9.53821	-5.42744	-12.4838	-5.69517	-9.06284	-11.7871	-7.26932	-4.54608	-5.86764	-10.123	-10.3126	-5.08985	-7.48625	-6.18032	-6.38942	-0.277992	-5.36735
852	-6.66399	-4.87634	-5.05614	-4.00719	-7.7657	-6.58485	-15.4747	-13.7061	-11.3537	-10.6805	-6.5614	-5.51978	-10.3561	-7.64894	-12.4276	-14.226	-9.31982	-5.14945	-12.2712	-5.57303	-8.90796	-11.3459	-7.988	-4.32867	-6.11338	-9.72777	-10.872	-4.79524	-6.82327	-6.1129	-4.74687	0.015634	-5.84028
854	-5.22909	-3.89238	-4.90077	-3.67448	-7.36899	-7.03091	-14.7233	-13.412	-10.1186	-9.30614	-5.89744	-4.72147	-10.0512	-6.84037	-11.768	-13.9377	-8.91725	-4.64819	-11.6376	-5.17534	-8.42868	-10.8324	-8.15265	-4.07315	-6.16322	-9.66768	-10.637	-3.83913	-5.51538	-5.60674	-5.1045	-0.240373	-7.74079
856	-4.44641	-3.27435	-4.95109	-3.22745	-7.16428	-6.72507	-13.9744	-13.005	-9.70725	-8.54301	-5.31898	-4.84068	-9.41167	-7.99337	-11.0581	-13.4115	-8.62704	-4.25196	-11.0405	-4.84459	-7.92791	-10.4323	-7.80186	-4.32525	-5.6385	-9.76392	-10.5124	-3.19471	-5.02096	-4.7371	-7.04312	-0.469509	-9.19524
858	-4.83188	-3.93928	-4.71023	-2.88399	-6.61612	-5.53932	-13.305	-12.6943	-9.72533	-9.16495	-5.07275	-5.37272	-9.55726	-8.68469	-10.3341	-13.3656	-8.22691	-3.92756	-10.5383	-4.46839	-7.33479	-9.75464	-7.06608	-4.20066	-4.45276	-9.31738	-10.3878	-3.48052	-5.40008	-4.41367	-7.80625	-0.585298	-8.05884
860	-5.67563	-5.2027	-4.56611	-3.13413	-6.14074	-5.00679	-12.8111	-12.5233	-9.99111	-9.82158	-5.60479	-5.87448	-9.97645	-8.41598	-9.97059	-13.6158	-8.00461	-3.94466	-10.1655	-4.36873	-6.90925	-9.13466	-6.73923	-3.75558	-4.14399	-8.86839	-10.0405	-4.25098	-5.89744	-5.10597	-6.58973	-0.925338	-5.51148
862	-5.9932	-5.49096	-4.58467	-3.63539	-6.11974	-5.72351	-12.6044	-12.2444	-10.8441	-8.54936	-6.26142	-5.88425	-9.25924	-8.34612	-10.1939	-13.4159	-8.04614	-4.12835	-9.80838	-4.46253	-6.70796	-8.88451	-6.96055	-3.46684	-5.13235	-8.89477	-9.80252	-4.51481	-5.74745	-5.05076	-5.06591	-1.27564	-4.0922
864	-5.98685	-5.09864	-4.49233	-3.53573	-5.70348	-6.10654	-12.2766	-11.4143	-11.3801	-5.92333	-6.39284	-5.72351	-8.28798	-8.2015	-10.1797	-12.4168	-7.78476	-3.95687	-9.06088	-4.22704	-6.28194	-8.46533	-6.792	-3.00368	-5.54421	-8.02562	-9.45515	-4.3145	-4.7928	-4.39169	-5.07763	-1.30642	-3.84206
866	-6.08896	-4.79524	-4.39316	-2.87031	-4.97308	-5.93115	-11.5296	-10.723	-10.3302	-4.9638	-6.44805	-5.84419	-8.74332	-7.62207	-9.52306	-11.7607	-7.35775	-3.51032	-8.29677	-3.88847	-5.77432	-7.79697	-6.44219	-2.67781	-5.06981	-6.62686	-9.12293	-4.05996	-3.7761	-5.24081	-5.96486	-1.14617	-4.22216
868	-5.61065	-4.10441	-3.9725	-2.09154	-4.30863	-5.788	-10.4924	-10.5212	-8.07448	-6.14074	-6.3606	-5.36051	-9.11853	-7.69877	-8.52688	-12.1432	-7.05875	-3.01003	-7.77205	-3.54452	-5.3522	-6.99426	-6.25214	-2.3324	-4.52214	-5.61603	-9.50108	-3.3872	-3.12485	-6.11094	-5.72644	-1.17841	-5.64876
870	-5.02438	-3.66129	-3.75314	-2.03389	-4.2803	-5.80266	-10.21	-10.4435	-7.30548	-7.36997	-6.25702	-4.82211	-8.02122	-8.74674	-8.25231	-12.6631	-7.14669	-2.98512	-7.625	-3.51667	-5.27599	-6.89753	-6.10654	-2.15798	-4.4596	-4.97406	-10.421	-3.0115	-3.33151	-5.32436	-5.94972	-1.29762	-6.78907
872	-5.07226	-4.01452	-4.293	-2.47213	-4.96038	-5.77188	-10.8945	-10.2271	-8.58258	-7.91862	-6.42997	-4.96038	-6.69087	-8.19808	-9.06137	-12.5194	-7.45937	-3.45072	-7.75691	-3.94172	-5.4465	-7.70463	-5.84809	-2.74523	-4.73906	-5.10597	-10.6736	-3.33981	-4.39951	-4.11956	-6.51938	-1.06653	-6.13586
874	-5.19342	-4.2632	-4.65209	-2.45552	-5.24814	-5.44943	-11.0537	-9.86897	-9.0604	-8.32413	-6.03179	-4.89393	-5.91454	-6.45098	-9.291	-12.2087	-7.49553	-3.69891	-7.55709	-4.21239	-5.31654	-8.04321	-5.53883	-3.29291	-4.60128	-5.52076	-10.5109	-3.54892	-4.88905	-3.42531	-5.34292	-0.740661	-5.20661
876	-5.44992	-4.30228	-4.55976	-2.47408	-4.81918	-5.24325	-9.82255	-9.46639	-6.87212	-8.08767	-5.48412	-4.85436	-5.49731	-6.66351	-7.52484	-12.0587	-7.3729	-3.75607	-6.80812	-4.22851	-4.85631	-7.25418	-5.40741	-3.23819	-4.33404	-5.06884	-10.8837	-3.68621	-3.5968	-3.7976	-4.53582	-0.640506	-5.36149
878	-5.85982	-4.20408	-4.65893	-2.73302	-4.48452	-5.3097	-8.17219	-8.82588	-3.4087	-6.15833	-5.7113	-5.29358	-5.47972	-7.8854	-5.12502	-11.6043	-7.25076	-3.87332	-5.89158	-4.27492	-4.3487	-6.2707	-5.10011	-3.25236	-4.44348	-4.10344	-11.1739	-3.82593	-0.985431	-4.94865	-5.51734	-0.804663	-6.48078
880	-5.79924	-3.59533	-4.64379	-2.51659	-3.88407	-5.13479	-7.05826	-7.80674	-1.30104	-3.03349	-5.84761	-5.27599	-6.13146	-8.00852	-3.95345	-10.6751	-6.86431	-3.70575	-5.03513	-4.06728	-3.78832	-5.38201	-4.3658	-2.9944	-4.49527	-3.94661	-10.6795	-3.50593	1.31228	-4.91689	-5.76455	-1.22336	-7.83166
882	-5.59746	-3.27874	-4.22558	-2.20684	-2.73546	-4.73075	-6.4842	-7.02358	-1.19698	-1.41732	-5.68687	-4.63206	-7.40612	-7.8468	-3.63295	-10.0952	-6.35278	-3.39258	-4.46204	-3.62904	-3.29584	-4.33844	-3.77854	-1.99431	-4.39609	-4.73857	-9.96228	-3.29047	1.99969	-4.20017	-4.90224	-1.43931	-8.08229
884	-5.59844	-3.50495	-4.16158	-2.40422	-2.63384	-4.70974	-6.64348	-7.15158	-2.35683	-2.39982	-5.92969	-4.21092	-7.9069	-7.85902	-3.47173	-10.4836	-6.43095	-3.52009	-4.71023	-3.68181	-3.43753	-4.17916	-3.8958	-1.79254	-4.51774	-4.90957	-9.5558	-3.51081	0.957583	-4.38094	-4.92471	-1.34404	-7.83899
886	-5.72986	-3.66813	-4.85387	-2.82634	-4.33599	-5.46848	-8.11209	-8.1844	-4.65698	-4.58369	-5.97219	-4.45618	-6.78223	-7.40661	-4.11614	-11.3928	-7.34456	-4.18454	-5.92627	-4.46986	-4.49331	-5.79582	-4.79231	-3.19813	-5.00826	-4.29593	-9.49473	-3.79955	-1.23069	-4.36677	-5.54421	-1.5121	-8.31876
888	-6.1598	-3.82398	-5.85396	-3.26653	-6.46173	-6.50961	-10.2779	-9.46199	-7.54536	-6.85111	-5.895	-5.03024	-6.15247	-7.44618	-5.97805	-12.2111	-8.51565	-4.98969	-7.53119	-5.47825	-5.94483	-8.07887	-6.02105	-4.89198	-5.77334	-4.61692	-9.93248	-4.18356	-3.6564	-3.95345	-5.90819	-1.837	-8.93874
890	-6.61318	-3.89824	-6.66741	-3.62855	-7.76668	-7.01283	-11.9102	-10.2085	-9.61052	-8.80732	-7.08904	-5.59062	-7.21021	-8.71547	-8.0305	-12.4168	-9.27438	-5.49975	-8.72622	-6.11534	-6.96739	-9.62126	-6.65813	-5.77334	-6.35083	-5.90086	-10.2266	-4.46058	-5.57059	-4.955	-6.72164	-1.64548	-9.08433
892	-6.4329	-3.4815	-6.52524	-3.45218	-7.753	-6.7578	-12.3685	-10.1045	-9.72631	-10.1098	-8.48194	-5.57841	-7.9367	-9.55433	-8.66368	-11.9512	-9.24605	-5.33657	-9.00274	-5.94727	-7.06071	-9.90414	-6.37135	-5.38738	-6.20914	-6.51254	-9.71849	-4.18796	-6.35913	-7.02553	-6.70699	-1.26831	-8.92702
894	-6.38796	-3.45902	-5.57157	-3.08088	-6.64885	-6.03863	-11.7788	-9.5685	-8.38715	-10.3429	-8.58111	-5.06542	-7.4882	-9.54945	-7.68069	-11.4783	-8.76481	-4.90517	-8.60652	-5.38543	-6.63908	-9.17716	-5.74696	-3.94368	-5.66244	-6.09238	-9.22357	-4.06191	-6.0528	-7.86097	-5.58867	-1.3924	-8.0862
896	-7.45253	-4.84117	-5.4421	-3.50788	-6.37086	-5.85396	-11.4876	-9.37796	-7.33235	-9.39408	-8.19613	-5.46946	-7.37974	-9.47079	-6.91463	-11.363	-8.82784	-5.26622	-8.59919	-5.55203	-6.75096	-9.01154	-5.57255	-3.44486	-5.71081	-6.00492	-9.54993	-4.95696	-5.42158	-6.74558	-5.93897	-1.59516	-6.52915
898	-7.98751	-5.89793	-6.02153	-4.13959	-7.44814	-6.25067	-12.0206	-9.39848	-7.04116	-7.44423	-7.75935	-6.36988	-8.16974	-8.9021	-7.12959	-11.0611	-9.21478	-5.76309	-8.93532	-6.0958	-7.16624	-9.85773	-5.72107	-4.43713	-6.17006	-6.50326	-9.98329	-5.52467	-4.43029	-5.21345	-7.17259	-1.41488	-5.94776
900	-7.14181	-5.20221	-5.85054	-3.81958	-8.09402	-6.06502	-12.3294	-8.94412	-7.05094	-5.22567	-7.05826	-5.9976	-9.5128	-7.85462	-7.4413	-10.2525	-8.99102	-5.28576	-8.77654	-5.87594	-7.01478	-10.2691	-5.42891	-4.97552	-6.03424	-6.74949	-9.55922	-4.80355	-3.13901	-4.67212	-6.95371	-1.28981	-7.13643
902	-6.51156	-4.06093	-5.31458	-2.95874	-7.70072	-5.15678	-12.088	-8.08913	-7.12959	-3.5538	-6.53501	-4.86413	-9.97938	-6.78711	-7.50041	-9.17228	-8.36175	-4.50992	-8.32022	-5.18267	-6.46368	-9.86506	-4.60031	-4.63451	-5.2755	-6.4974	-8.45849	-3.94563	-2.24299	-4.44348	-5.57694	-1.41732	-8.67248
904	-6.68989	-3.97299	-5.51929	-2.798	-7.44716	-4.63353	-12.2663	-7.67043	-7.51605	-3.08039	-7.14718	-4.67359	-9.06821	-6.46173	-7.81358	-8.58649	-8.24401	-4.4811	-8.37787	-5.01412	-6.36988	-9.87336	-4.14155	-4.61496	-4.98383	-6.38845	-7.72369	-3.96713	-2.26107	-4.827	-5.1773	-1.39534	-8.94314
906	-6.94541	-4.70535	-6.23211	-3.5841	-8.01194	-5.06346	-13.3358	-8.32999	-8.60408	-4.51139	-8.27088	-5.40985	-8.63779	-7.28984	-8.58942	-9.17618	-8.84934	-5.11769	-9.3037	-5.60088	-7.10126	-10.8075	-4.6604	-5.05809	-5.6512	-7.0568	-8.09109	-4.58565	-3.42922	-6.05427	-5.9502	-1.27955	-8.12529
908	-7.18041	-5.35465	-6.60586	-4.31694	-8.72573	-5.80119	-14.308	-9.52013	-9.60758	-7.13644	-8.57965	-5.94727	-8.81367	-8.49073	-9.15469	-10.3243	-9.67256	-5.69615	-10.4416	-6.33568	-8.04858	-11.7294	-5.52564	-5.35025	-6.40408	-7.60692	-9.03206	-5.15727	-4.93741	-6.25067	-6.16713	-1.28834	-7.19946
910	-7.64601	-5.58085	-6.72653	-4.53582	-9.40385	-6.08016	-14.9231	-10.3609	-10.318	-9.11951	-8.42819	-5.96095	-9.77076	-9.45124	-9.8035	-11.0606	-10.2657	-5.98147	-11.2052	-6.75731	-8.69739	-12.3152	-5.96877	-5.82416	-6.67572	-7.6421	-9.7947	-5.46066	-6.20768	-5.75576	-6.39284	-1.16718	-6.41874
912	-7.83166	-5.33804	-6.71969	-4.35212	-9.84894	-5.80754	-15.4278	-10.4635	-11.3205	-9.21038	-8.06422	-5.98782	-11.1212	-9.47274	-10.9145	-11.0327	-10.3478	-5.99515	-11.4895	-6.69819	-8.87914	-12.5487	-5.79435	-6.38258	-6.44219	-7.83654	-9.92808	-5.40057	-6.92244	-5.63313	-7.20874	-1.11295	-5.84077
914	-7.56881	-4.82407	-6.22722	-3.88994	-9.2226	-5.5188	-15.3086	-9.88997	-11.4065	-7.20679	-7.34456	-5.89842	-10.936	-8.57086	-11.319	-10.1914	-9.92271	-5.60479	-11.127	-6.16273	-8.51223	-11.9732	-5.3224	-5.85591	-6.03961	-8.23765	-9.24849	-4.99555	-5.97659	-5.40546	-7.10908	-1.18965	-5.7284
916	-6.97228	-4.08096	-5.35611	-3.27826	-7.79893	-5.27892	-14.4976	-9.06284	-9.45222	-4.38827	-6.43193	-5.25791	-9.21771	-7.82531	-10.4162	-9.01691	-9.35158	-4.88318	-10.338	-5.46164	-7.81358	-10.9824	-4.76202	-4.35407	-5.68198	-8.23863	-8.22984	-4.22851	-3.56797	-4.68141	-6.28096	-1.28981	-6.80714
918	-6.39235	-3.52303	-4.69264	-2.82927	-6.66106	-4.72196	-13.8082	-8.49611	-7.78915	-3.06475	-5.80217	-4.83433	-7.85413	-6.92977	-9.45027	-8.27527	-8.94656	-4.35944	-9.79275	-4.95207	-7.3172	-10.3507	-4.26613	-3.09602	-5.18756	-8.00168	-7.47599	-3.59436	-2.24739	-4.12493	-5.27892	-1.36749	-8.30703
920	-6.22136	-3.77952	-4.84508	-3.25529	-6.77685	-4.65503	-14.2221	-9.09117	-9.24165	-4.8656	-6.1642	-5.34341	-8.28505	-6.621	-9.94225	-8.86692	-9.19719	-4.6262	-10.3082	-5.16069	-7.73688	-10.6399	-4.59786	-3.20253	-5.22518	-8.38373	-7.81114	-3.76633	-3.86795	-4.47426	-4.82993	-1.12467	-8.76579
922	-6.01469	-4.12054	-5.48998	-4.11907	-8.26062	-5.46702	-15.6125	-10.3033	-11.6107	-7.45791	-6.76855	-5.80412	-9.12	-7.48673	-11.3952	-10.1167	-10.0663	-5.25058	-11.513	-5.92089	-8.78924	-11.9664	-5.54616	-4.60861	-5.98489	-8.91383	-8.90259	-4.12591	-6.00053	-4.81869	-5.35123	-1.08168	-8.89868
924	-5.9673	-4.02527	-5.71569	-4.23437	-9.65351	-5.99906	-16.5129	-10.4098	-11.169	-6.77392	-7.12911	-5.45382	-9.44392	-7.67337	-12.0768	-10.1484	-10.6512	-5.39715	-11.8511	-6.26777	-9.3208	-13.1375	-5.84663	-5.73573	-6.2453	-8.69006	-9.1073	-4.12689	-5.27452	-5.04588	-5.97561	-1.27564	-9.07407
926	-6.17983	-3.67692	-5.48509	-3.56748	-9.5983	-5.75918	-15.8485	-9.46883	-8.54252	-3.21328	-7.35922	-4.8485	-9.33057	-6.88092	-11.1754	-9.11121	-10.4587	-4.9809	-11.0122	-5.92187	-8.95829	-12.8282	-5.37321	-5.71081	-5.66293	-7.59764	-8.3852	-3.94221	-2.45014	-5.12404	-5.91845	-1.21115	-8.75113
928	-6.03326	-3.30464	-5.19684	-2.95874	-8.72133	-5.76308	-14.693	-9.03694	-6.98205	-0.939994	-6.87994	-4.52116	-8.50539	-7.26444	-9.76197	-8.6544	-10.1396	-4.53924	-10.3766	-5.54763	-8.64023	-11.8525	-5.26524	-5.1773	-5.40106	-6.43486	-8.01047	-3.69304	-0.750921	-4.67799	-5.00484	-1.34599	-8.64707
930	-5.76406	-3.45023	-5.25058	-3.04033	-8.50832	-6.56237	-14.8137	-10.1108	-7.98507	-3.02127	-6.30197	-4.48549	-7.49162	-9.2822	-9.55042	-9.74243	-10.571	-4.68043	-11.0498	-5.8437	-9.22504	-11.9669	-6.2834	-4.89931	-6.01958	-6.04401	-8.6031	-3.72285	-2.03389	-4.66382	-4.5622	-1.68798	-9.17863
932	-5.71032	-4.07559	-5.96144	-3.59729	-9.50108	-7.62304	-16.339	-11.9165	-10.6077	-7.30548	-6.39138	-4.73173	-7.4926	-10.3438	-10.7235	-11.4236	-11.6151	-5.3312	-12.5815	-6.73581	-10.445	-13.2669	-7.71343	-5.55789	-6.81985	-6.26093	-9.68038	-4.05263	-5.07421	-5.38445	-5.062	-1.67675	-9.51525
934	-6.17836	-4.77375	-6.99622	-4.35212	-10.6062	-8.71449	-17.9527	-13.2992	-13.0783	-9.74683	-7.18529	-5.64632	-9.74047	-9.72142	-12.2849	-12.3611	-12.6777	-6.13586	-13.9358	-7.64503	-11.5462	-14.4531	-8.84054	-6.63126	-7.62109	-7.13741	-10.488	-4.57881	-7.65822	-7.01625	-6.50326	-1.35136	-9.21967
936	-7.48478	-5.37761	-7.56246	-4.92422	-10.5109	-9.48007	-18.3929	-14.0877	-14.1796	-10.2285	-8.43552	-6.49544	-12.0489	-8.7013	-13.0212	-12.7163	-13.2537	-6.71236	-14.6339	-8.07106	-12.0558	-14.4571	-9.56655	-6.7876	-8.2103	-8.71303	-10.6257	-5.34536	-8.8039	-8.56988	-8.14874	-1.22287	-8.60847
938	-8.45897	-5.41181	-7.0993	-4.59689	-9.75757	-9.07065	-17.8413	-14.0765	-13.8004	-9.84307	-8.91578	-6.26288	-12.1056	-7.91325	-12.6704	-12.6455	-13.0007	-6.56579	-14.4258	-7.77841	-11.8447	-13.8014	-9.35598	-6.05915	-7.71489	-9.56313	-10.2393	-5.65658	-8.43406	-7.99435	-7.7657	-1.3157	-8.12724
940	-7.93817	-4.86853	-6.1085	-3.75363	-9.83867	-7.98898	-17.578	-13.7179	-13.1057	-9.58609	-7.97725	-5.80217	-10.8857	-7.94207	-12.2463	-12.4295	-12.432	-5.90575	-13.9529	-7.19799	-11.4114	-13.7814	-8.62557	-5.66391	-6.48127	-8.57525	-10.1714	-5.04734	-7.74079	-5.96682	-5.91112	-1.28541	-7.85316
942	-7.43641	-5.00923	-6.15931	-3.75509	-11.0205	-8.17219	-18.1491	-14.4326	-13.5083	-10.7425	-6.99719	-5.86031	-10.2754	-9.2309	-12.4051	-13.3104	-12.7124	-5.90037	-14.4742	-7.46963	-11.7607	-14.5694	-9.13172	-6.4671	-6.32493	-7.74567	-11.1109	-4.89002	-8.23423	-4.71219	-5.37468	-1.3284	-7.48429
944	-7.70854	-5.596	-7.13546	-4.47084	-11.7792	-9.41509	-18.6924	-15.7171	-14.3989	-11.7631	-6.88727	-5.79289	-10.8021	-10.2535	-12.6806	-14.5953	-13.5088	-6.56873	-15.4215	-8.31289	-12.5492	-15.1029	-10.4333	-7.41443	-7.27177	-8.4751	-12.0699	-5.49047	-8.96806	-5.45871	-6.82229	-1.58148	-7.27274
946	-7.47794	-5.19489	-7.26004	-4.58809	-11.0435	-9.89242	-18.4789	-16.17	-14.7038	-11.2995	-7.1721	-5.48216	-10.3908	-9.4615	-12.5785	-14.9134	-13.6578	-6.71187	-15.6174	-8.43992	-12.6899	-14.7336	-10.7987	-6.88287	-7.69242	-8.78973	-11.9571	-5.38885	-8.97978	-7.22389	-7.92986	-1.92298	-7.68851
948	-6.61709	-4.12787	-6.89118	-4.23486	-10.5544	-9.96668	-18.5297	-16.3375	-15.0629	-11.1852	-7.29033	-5.17583	-9.02473	-8.87083	-12.8849	-15.1689	-13.6583	-6.4671	-15.6667	-8.3085	-12.6821	-14.6539	-10.829	-6.37428	-7.689	-8.52395	-11.959	-4.65063	-9.1884	-7.40514	-6.94003	-2.18925	-8.67638
950	-5.98538	-3.56651	-6.65862	-3.97397	-10.6702	-10.0087	-18.7281	-16.5193	-15.1752	-11.9375	-6.89802	-5.08056	-8.415	-10.1758	-13.3304	-15.6785	-13.6636	-6.32102	-15.743	-8.27967	-12.6474	-14.7399	-10.9438	-6.66595	-7.65529	-8.75504	-12.8819	-4.12005	-9.32862	-5.56619	-6.02886	-1.91321	-9.01887
952	-5.94776	-3.84108	-6.20719	-3.79125	-10.1939	-9.38187	-18.3734	-16.2022	-14.8762	-12.5282	-6.46564	-5.88376	-9.01154	-11.6732	-13.4736	-15.7259	-13.2376	-6.17201	-15.355	-7.96943	-12.1999	-14.2089	-10.4269	-6.31858	-7.15744	-9.29148	-13.5703	-4.12542	-9.24507	-4.74052	-6.98987	-1.60297	-8.18587
954	-6.0401	-4.2461	-6.2023	-3.66666	-10.3566	-8.91529	-18.3509	-16.1128	-15.1391	-13.8923	-6.16761	-6.81936	-9.39115	-11.4431	-13.8209	-15.8162	-13.0402	-6.19546	-15.1928	-7.88687	-12.0792	-14.2201	-10.0175	-6.20621	-6.68158	-9.68185	-13.2625	-4.47914	-10.2124	-5.27061	-7.68802	-1.92054	-7.92302
956	-6.02495	-4.21434	-6.50081	-3.73653	-10.8744	-9.27145	-18.3367	-16.4396	-15.0888	-15.2246	-6.18667	-6.3308	-8.86692	-10.1382	-13.5298	-16.19	-13.1409	-6.33861	-15.2734	-8.01487	-12.1843	-14.4795	-10.2315	-6.46417	-6.89899	-9.03988	-12.7236	-4.60519	-11.0293	-5.03464	-6.7319	-2.25081	-8.44774
958	-6.50033	-4.4425	-6.75389	-4.26857	-10.5046	-9.65058	-17.7441	-16.405	-13.7701	-14.2172	-6.93368	-5.63362	-9.04232	-9.59977	-12.5981	-16.3214	-13.1228	-6.48958	-14.9505	-8.03344	-11.9976	-14.0843	-10.4489	-6.1725	-7.47647	-8.15265	-12.7026	-4.9081	-9.82695	-4.60373	-6.49251	-2.18192	-8.26697
960	-7.26932	-5.1729	-7.14816	-4.83921	-9.82109	-9.57876	-16.9663	-15.9613	-11.7455	-11.7323	-7.63965	-6.06502	-9.58511	-9.71165	-11.9219	-16.1152	-12.9923	-6.65373	-14.3452	-8.02611	-11.7353	-13.4291	-10.4113	-5.85005	-7.67776	-8.07399	-12.8555	-5.48998	-7.49944	-4.89247	-7.75496	-2.15358	-7.91178
962	-7.17943	-5.17974	-6.89509	-4.6389	-8.92751	-9.11365	-15.8353	-15.0145	-9.93639	-9.20159	-7.45107	-5.895	-9.27927	-8.93777	-11.0796	-15.2974	-12.5307	-6.35278	-13.4575	-7.6504	-11.0904	-12.4373	-9.84991	-5.42647	-7.40514	-8.07594	-12.4398	-5.33706	-5.41767	-5.29162	-7.81212	-2.36171	-8.52981
964	-6.18032	-4.10393	-5.93017	-3.89384	-8.0349	-8.31876	-14.3945	-13.5464	-8.91871	-7.15793	-6.54527	-4.93644	-8.64658	-7.67239	-9.83672	-13.9739	-11.684	-5.60039	-12.2067	-6.85014	-9.99697	-11.2101	-8.67199	-4.84361	-6.94394	-7.31281	-11.4182	-4.35554	-4.18845	-5.16557	-6.28145	-2.3451	-9.49961
966	-5.45578	-3.07843	-5.26182	-3.32223	-7.61132	-7.32111	-13.3265	-12.219	-8.43699	-6.16175	-6.13146	-4.75616	-8.77312	-8.21078	-8.73794	-12.9616	-10.8583	-4.98285	-11.0997	-6.14465	-9.00274	-10.4079	-7.42322	-4.48794	-6.26337	-5.77139	-10.8735	-3.46342	-3.69402	-5.57548	-5.4465	-2.01874	-10.0834
968	-5.48509	-2.85125	-4.79964	-3.12045	-7.00501	-6.52866	-12.6904	-11.5203	-7.82287	-6.34057	-6.429	-5.43624	-9.07407	-9.70823	-8.12773	-12.8648	-10.3136	-4.699	-10.3668	-5.78409	-8.29482	-9.82744	-6.52182	-3.91436	-5.77334	-4.80257	-11.4294	-3.21963	-3.26995	-6.77685	-6.03082	-1.97086	-10.553
970	-5.852	-3.53231	-4.31694	-3.01981	-5.93066	-6.17739	-11.8779	-11.1529	-6.5526	-6.44805	-6.04108	-6.3518	-7.97725	-9.38675	-7.64698	-13.1492	-9.87043	-4.62571	-9.68478	-5.55593	-7.70512	-8.91725	-6.03912	-3.23624	-5.65658	-4.96135	-11.9898	-3.58703	-2.41448	-6.35522	-6.38551	-2.22101	-10.5051
972	-6.46173	-4.96966	-4.6477	-3.33493	-5.90965	-6.33031	-11.2707	-10.7586	-5.00386	-5.22469	-5.22713	-6.55895	-6.41532	-8.56108	-7.25662	-12.9645	-9.64716	-4.95745	-9.11218	-5.60186	-7.31623	-8.63095	-6.00444	-3.68669	-5.9204	-5.29602	-11.6063	-4.44641	-1.11979	-4.18063	-6.15833	-2.24739	-8.91285
974	-7.27812	-6.42753	-5.73377	-4.10735	-6.93368	-6.53062	-11.1299	-10.1943	-3.93635	-3.36375	-5.61652	-6.46222	-6.11876	-9.09117	-7.03921	-12.1852	-9.57876	-5.49535	-8.64512	-5.85005	-7.07927	-9.24214	-5.9077	-4.70095	-6.31076	-5.31019	-10.3673	-5.37663	0.0796356	-3.18689	-6.27559	-1.85116	-6.30344
976	-7.66897	-6.85014	-6.13488	-4.25538	-7.08123	-6.13879	-10.8051	-9.44489	-3.88407	-2.49753	-6.68012	-6.46271	-6.06209	-9.92124	-6.94785	-11.4026	-9.1884	-5.45089	-8.08278	-5.72009	-6.64347	-9.27048	-5.30872	-4.58711	-6.0445	-4.88709	-9.27683	-5.58476	0.120187	-3.48785	-6.16664	-1.4266	-4.91787
978	-7.10859	-6.09433	-5.72889	-3.61194	-7.00892	-5.59258	-10.7684	-9.10681	-5.26231	-3.66764	-6.5912	-5.73963	-5.65267	-10.0546	-7.51116	-11.3884	-8.9192	-5.05418	-7.92107	-5.4377	-6.39822	-9.03792	-4.84312	-4.32573	-5.36881	-4.96233	-9.2099	-4.98383	-1.40413	-3.05596	-6.04157	-1.50331	-6.10312
980	-5.79924	-4.82114	-5.24179	-2.95678	-7.24734	-4.94621	-11.0469	-9.13563	-7.04654	-5.95069	-5.61749	-5.13577	-5.84028	-9.44734	-8.16828	-11.8564	-8.83663	-4.71756	-8.07105	-5.18756	-6.39284	-9.0731	-4.52995	-4.36775	-4.7073	-5.43184	-9.36672	-4.08634	-3.20302	-2.20537	-6.78027	-1.92445	-8.30947
982	-4.69509	-3.50446	-4.48061	-2.34999	-6.60292	-4.30961	-10.9101	-8.94509	-8.42624	-7.50481	-4.74834	-4.9379	-6.53453	-8.19662	-8.20394	-12.1046	-8.42624	-4.13861	-7.90592	-4.65991	-6.0445	-8.61971	-4.12347	-3.4473	-4.11028	-5.66049	-9.18156	-3.19471	-4.35114	-1.71339	-7.05533	-2.00164	-9.39701
984	-4.72977	-2.79458	-3.69842	-1.70313	-5.23446	-4.29398	-10.2808	-8.53812	-8.89575	-7.74176	-4.66724	-4.24561	-7.27421	-6.66937	-7.86537	-11.9336	-7.87221	-3.50202	-7.41687	-4.11809	-5.36198	-7.62597	-3.88994	-2.11303	-3.7761	-6.05915	-8.90943	-2.7252	-4.54754	-2.11157	-5.17437	-1.82429	-9.16739
986	-5.51734	-3.06133	-3.54355	-1.78374	-4.40146	-4.77863	-9.56899	-8.22984	-7.63428	-7.326	-5.71325	-4.07901	-7.71098	-6.65031	-7.34554	-11.7309	-7.65187	-3.47417	-6.92635	-4.04188	-4.88465	-6.89069	-3.93928	-1.74515	-4.01892	-6.31907	-8.82588	-2.94554	-3.61878	-3.66422	-3.94368	-1.88585	-8.63779
988	-5.95509	-3.72724	-3.96957	-2.82047	-4.67457	-5.57255	-9.54847	-8.31094	-6.23015	-7.07927	-6.76708	-5.22029	-8.28749	-8.47558	-7.25467	-12.0221	-8.00657	-4.07266	-6.84818	-4.48061	-5.05809	-7.12911	-4.39413	-2.3026	-5.06004	-6.47101	-9.51231	-3.46635	-2.67683	-5.05907	-6.02105	-2.04073	-8.41061
990	-6.01225	-4.38485	-4.00817	-3.46489	-4.55927	-6.01274	-9.62126	-8.38422	-6.21012	-7.15549	-7.4154	-6.25116	-9.21869	-9.22309	-7.33088	-12.3577	-8.12235	-4.32769	-6.83011	-4.56073	-5.17388	-7.13253	-4.62718	-2.12036	-5.70739	-6.59511	-10.2403	-3.86111	-2.5288	-6.03863	-7.36508	-1.96549	-7.561
992	-5.68052	-4.40244	-3.20644	-2.91818	-3.0755	-5.35367	-8.79071	-7.88589	-6.54088	-6.78467	-7.56148	-6.08309	-9.74096	-8.32902	-6.76806	-12.1901	-7.28594	-3.64614	-6.11338	-3.76584	-4.42882	-5.89109	-4.00524	-0.772417	-4.97552	-6.11338	-10.381	-3.5841	-2.48532	-7.19946	-5.89011	-1.84042	-6.79786
994	-4.76739	-3.38965	-2.56349	-2.07395	-2.21221	-4.46791	-8.13555	-7.30157	-6.39675	-5.77139	-6.72946	-5.44747	-8.72671	-7.77743	-6.3518	-11.9517	-6.46466	-2.88692	-5.36002	-3.05254	-3.71015	-5.0322	-3.31636	-0.161714	-4.05409	-5.36344	-10.6404	-2.68856	-2.18827	-7.10321	-5.02536	-1.87803	-7.98067
996	-4.24756	-2.47115	-2.7125	-1.52529	-3.14488	-3.90068	-8.36224	-6.88678	-6.22966	-4.528	-5.83051	-4.87097	-6.60341	-7.36117	-6.5399	-11.4583	-6.23259	-2.69393	-5.13821	-2.89034	-3.51667	-5.5872	-2.91965	-0.92436	-3.59387	-5.14652	-10.3815	-2.11157	-1.94936	-4.74297	-5.24325	-1.70704	-9.18644
998	-4.7459	-2.90304	-3.19325	-1.30495	-4.50504	-3.51081	-8.68664	-6.45391	-6.25116	-3.00906	-5.56082	-4.20994	-5.39911	-6.71627	-6.3049	-10.3253	-6.09677	-2.76526	-5.02682	-2.85956	-3.33688	-6.52769	-2.50486	-1.80377	-3.34568	-4.99946	-9.07261	-2.42865	-1.57317	-2.47408	-4.62913	-1.13591	-7.87758
1000	-5.87399	-4.42052	-3.68327	-1.8282	-5.07226	-3.59338	-8.91089	-6.38161	-6.29904	-1.98014	-5.99076	-4.11077	-6.16126	-6.96837	-5.79924	-9.51622	-6.05134	-3.05791	-5.11574	-2.93529	-3.36375	-7.08904	-2.45063	-2.1272	-3.60315	-4.63988	-8.21567	-3.51765	-1.18965	-2.7081	-4.43126	-0.73431	-5.36588

## Sheet: 13
	FP1	FP2	F3	F4	C3	C4	P3	P4	O1	O2	F7	F8	T3	T4	T5	T6	CZ	FZ	PZ	FCZ	CPZ	CP3	CP4	FC3	FC4	TP7	TP8	FPZ	OZ	FT7	FT8	A1	BP1
-200	-0.851639	-1.05419	-0.79355	-1.84724	-0.865278	-1.74217	0.756676	-0.0439458	1.73258	1.15017	-0.297518	-1.3209	1.3896	0.0671815	2.19931	0.756171	-1.98514	-1.60023	-0.399553	-1.81946	-1.02288	-0.12123	-0.934985	-1.1143	-1.77854	1.75228	0.12325	-0.675351	0.947108	0.293477	-1.38101	-0.325805	-0.769304
-198	-1.50325	-1.88664	-1.78763	-2.45339	-1.21583	-2.13566	0.444509	-0.517752	1.30474	0.65262	-0.822342	-1.63004	-0.375307	-0.559172	1.60023	0.473806	-2.14425	-2.01898	-0.696061	-2.11647	-1.27241	-0.495527	-1.3108	-1.54164	-2.21598	0.801632	0.85265	-1.3113	0.523814	-0.0717276	-1.49163	-0.116179	0.750614
-196	-0.573316	-0.953674	-1.60579	-1.92705	-0.958726	-1.73359	0.6112	-0.374802	1.20068	0.478858	-0.497042	-0.690505	-0.349546	-0.911749	1.58609	0.513711	-1.60427	-1.74419	-0.436932	-1.70176	-0.943067	-0.290446	-1.09511	-1.31433	-1.90684	0.760212	1.1734	-0.509165	0.472291	0.00404099	-0.635446	-0.369751	0.75314
-194	0.350051	0.356113	-0.905688	-0.993579	-0.587964	-0.904172	0.878916	0.0176793	1.331	0.5915	-0.114158	0.246501	0.561193	-1.22291	1.76945	0.52937	-0.85568	-1.07793	0.0474817	-0.9956	-0.378338	0.0171742	-0.534926	-0.848103	-1.06076	1.05318	-0.199019	0.540483	0.744553	0.109107	0.0515227	-0.632415	-0.104056
-192	-0.134363	0.534421	-0.662723	-0.554121	-0.623828	-0.307115	0.668279	0.0717276	1.25776	0.488455	-0.173763	0.0495022	0.779406	-1.51285	1.60781	-0.0429356	-0.566749	-0.598067	0.266706	-0.622313	-0.16366	-0.112643	-0.136889	-0.635446	-0.493506	1.08905	-2.66706	0.533411	0.777891	0.0393997	-0.295498	-0.404604	-0.368235
-190	-0.907203	0.258118	-0.675856	-0.250036	-0.725358	-0.0848609	0.363184	-0.00303074	0.879421	0.311662	-0.0803147	-0.201039	0.303074	-1.26231	1.23604	-0.779406	-0.48795	-0.369751	0.343484	-0.452591	-0.146486	-0.321764	0.0353587	-0.56978	-0.256098	0.849619	-4.16424	-0.110622	0.490476	0.0525329	-0.595036	-0.0106076	-0.133858
-188	-0.641002	0.449055	-0.46724	0.0641508	-0.516742	-0.0616251	0.417738	0.107591	0.850629	0.575336	0.521288	-0.048997	-0.129312	-0.715256	1.14815	-0.716266	-0.319744	-0.285395	0.519773	-0.300044	-0.00555637	-0.216698	0.0636456	-0.396522	-0.153053	0.764758	-3.47778	-0.196998	0.509165	0.22276	-0.412686	0.0358638	-0.277313
-186	0.532401	0.521793	-0.269736	0.073243	-0.525329	-0.20205	0.457137	0.178814	1.08046	0.969838	0.683433	-0.140425	0.189422	0.0944582	1.07389	-0.0181845	-0.328836	-0.368741	0.589985	-0.416727	0.0616251	-0.278829	-0.128302	-0.437437	-0.258118	0.77284	-1.26938	0.134363	0.848103	0.254583	-0.473806	-0.139919	-0.601098
-184	0.91781	-0.179319	-0.434912	-0.106076	-0.896595	-0.402079	0.126786	0.0671815	0.91781	0.925387	-0.173258	-0.220739	0.908718	1.56841	0.403089	0.512196	-0.519268	-0.478353	0.504114	-0.645549	-0.0298023	-0.745563	-0.355102	-0.71273	-0.400563	0.311156	1.09966	-0.257108	0.880431	-0.0631405	-0.477847	0.0323279	-0.288426
-182	-0.0500073	-1.09713	-0.741017	-0.284385	-1.21078	-0.598572	-0.38743	-0.152042	0.370256	0.339443	-0.951654	-0.0742532	1.07541	2.30185	-0.499568	0.42885	-0.6309	-0.521793	0.324795	-0.715256	-0.127291	-1.13501	-0.584934	-0.890029	-0.42582	-0.307115	2.52006	-1.01934	0.42784	-0.278829	-0.133858	0.40814	0.32732
-180	-0.512196	-1.04359	-0.562203	-0.14194	-1.09056	-0.5718	-0.577357	-0.10355	0.0697071	-0.116179	-0.698081	0.232357	1.23048	1.29918	-0.863762	0.0646559	-0.411676	-0.340454	0.392481	-0.441478	0.0212152	-1.05015	-0.60918	-0.706669	-0.185381	-0.322774	2.28872	-0.807693	0.0904172	-0.118199	0.277818	0.307621	0.278829
-178	-0.165176	-0.185886	0.24246	0.478858	-0.663733	-0.227811	-0.462189	0.268726	0.145476	0.0575841	0.270241	0.608169	1.68863	-0.314187	-0.699092	-0.188411	0.0444509	0.178814	0.756171	0.0984992	0.42582	-0.744553	-0.208616	-0.219729	0.295498	0.0747584	0.928418	-0.024246	0.247006	0.200029	0.637467	-0.103045	-0.421273
-176	-0.334392	0.418243	0.601603	0.758191	-0.679392	-0.0520278	-0.817291	0.200029	-0.116179	0.186896	0.61019	0.287921	1.4199	-1.71641	-0.773345	-0.456632	0.103045	0.443499	0.703133	0.198009	0.463704	-0.964787	-0.107591	-0.150527	0.314692	0.248016	-0.186391	0.104056	0.275798	0.0227306	0.238924	-0.105571	-0.924882
-174	-0.771325	0.638982	0.372276	0.464714	-0.994589	-0.133353	-1.40374	-0.214678	-0.680402	0.097489	0.0899121	-0.315703	0.434407	-2.36146	-1.16482	-0.509165	-0.142445	0.264685	0.28489	-0.0414202	0.14396	-1.44516	-0.371266	-0.465724	-0.0702123	0.24347	-0.456632	-0.253067	-0.00959736	-0.528865	-0.523309	0.196493	-0.619787
-172	-0.450066	0.939026	0.149517	0.325805	-0.882452	0.00656661	-1.45375	-0.24347	-1.06278	0.188411	-0.0767789	-0.0868813	-1.03146	-1.58761	-1.5083	-0.391976	-0.0919326	0.175278	0.0828404	0.0348536	0.0798096	-1.36687	-0.296508	-0.476837	-0.0171742	-0.264685	-0.885988	-0.270747	-0.192452	-0.402584	-0.412181	0.214173	0.118704
-170	-0.0116179	0.75415	-0.410666	0.161135	-0.659692	0.0484919	-1.48557	-0.274788	-1.57144	0.0575841	-0.155578	0.18235	-3.19996	-0.804663	-2.19224	-0.664238	-0.104056	-0.118704	-0.159114	-0.0550585	-0.0196998	-1.16734	-0.24246	-0.519773	0.00151537	-2.01292	-2.22154	-0.280849	-0.470271	-0.285395	-0.0378843	-0.0136384	0.742532
-168	-0.436427	-0.299539	-1.10269	-0.395007	-0.898111	-0.351566	-2.00029	-0.742027	-2.04474	-0.391976	-0.941551	-0.266706	-4.9088	-1.37343	-3.15753	-1.30575	-0.499063	-0.720307	-0.65161	-0.607664	-0.518257	-1.42748	-0.573316	-0.921346	-0.459158	-3.89451	-3.65508	-0.680402	-0.857701	-1.01378	-0.362174	0.0439458	1.16987
-166	-0.62989	-0.654641	-0.917305	-0.506639	-0.952664	-0.465724	-2.2776	-1.06834	-1.8927	-0.715256	-1.27544	-0.396017	-5.08761	-2.01494	-3.40908	-1.63408	-0.61019	-0.689494	-0.858711	-0.697071	-0.784458	-1.51992	-0.677877	-0.85366	-0.497547	-4.04352	-3.55456	-0.542503	-0.903667	-1.3507	-0.617262	0.275798	0.872854
-164	0.289436	0.511691	0.00808199	0.278829	-0.254077	0.0964787	-1.75127	-0.802642	-1.3411	-0.800117	-0.156083	0.360153	-3.69498	-1.49416	-2.7504	-1.16431	0.0303074	0.168206	-0.525834	0.0636456	-0.373287	-0.93448	-0.226801	0.0560688	0.118704	-2.65998	-1.3603	0.61019	-0.667774	-0.663228	-0.00151537	0.0949633	-0.229831
-162	1.27847	1.76339	0.733945	1.00671	0.423799	0.534926	-1.08198	-0.479363	-0.93549	-0.799611	1.09056	1.05672	-1.22493	0.0798096	-2.06899	-0.415717	0.718286	0.865278	-0.165681	0.761222	0.111127	-0.322269	0.133353	0.77385	0.511691	-1.31686	1.66236	1.48304	-0.463199	0.097489	0.663228	-0.260644	-1.00419
-160	0.961756	1.41334	0.987013	0.809209	0.422284	0.182855	-1.08703	-0.740007	-0.950139	-1.09966	1.16936	0.815775	0.638477	1.65125	-1.9715	-0.198514	0.729399	0.810724	-0.273777	0.721822	0.0590995	-0.274282	-0.192957	0.704648	0.229831	-0.881442	3.75156	0.926398	-0.565739	0.294992	0.506639	-0.057079	-0.565234
-158	-0.154568	-0.287416	0.881947	0.311662	0.191947	-0.279839	-1.33151	-1.14966	-1.21129	-1.39667	0.553616	0.00454612	0.658682	2.05131	-2.20285	-0.481888	0.51068	0.491486	-0.597057	0.429861	-0.154063	-0.359648	-0.671815	0.409656	-0.141435	-1.19108	3.64902	-0.0752635	-0.780417	-0.028287	0.205586	0.473301	0.497547
-156	-0.295498	-1.14411	0.743038	0.477847	0.436427	0.0631405	-1.02894	-0.945087	-1.20017	-1.07591	0.0348536	-0.226296	-0.617767	1.20927	-2.13667	-0.763243	0.767789	0.678382	-0.482899	0.709194	0.125776	0.0424304	-0.480878	0.530885	0.227811	-1.67701	1.55679	0.044956	-0.651105	-0.403594	0.384399	0.474817	0.871844
-154	0.535432	-0.439963	0.988023	0.953674	1.12188	0.734956	-0.355102	-0.44653	-0.947613	-0.536442	0.165681	0.257613	-1.68206	0.101025	-1.71136	-0.905182	1.32191	1.16431	-0.0191947	1.331	0.633426	0.655146	0.129817	1.06278	1.00368	-1.76541	-0.431376	0.75213	-0.371266	-0.159619	0.596552	0.114663	0.533411
-152	1.49921	0.693535	1.44314	1.15875	1.65681	1.01277	0.171237	-0.0944582	-0.683433	-0.296508	0.872854	0.595541	-0.81325	-0.245995	-1.14815	-0.833455	1.71439	1.55073	0.344495	1.7149	0.964787	1.05217	0.543514	1.66893	1.30827	-0.933975	-0.54907	1.15673	-0.175278	0.644538	0.698587	0.024246	0.211647
-150	2.04121	1.35828	1.82148	1.39616	1.89068	1.24513	0.556647	0.301054	-0.375812	-0.192452	1.32646	0.756171	1.56033	0.219729	-0.417738	-0.316208	1.9225	1.9518	0.634436	2.03413	1.28403	1.39616	0.855175	2.15233	1.429	0.624839	0.46724	1.43354	-0.0676867	1.13552	0.784963	0.0474817	0.12224
-148	1.72702	1.0451	2.06949	1.61842	1.94119	1.5275	0.823352	0.5915	-0.221749	0.0580893	1.11127	0.989538	2.85799	0.87639	0.0990043	0.254077	1.90886	2.11596	0.816786	2.20234	1.42394	1.6265	1.15926	2.30791	1.64974	1.55881	0.977415	1.37091	-0.0702123	1.06632	0.863257	-0.0889018	0.295498
-146	1.08198	0.214678	2.12405	1.5477	1.79117	1.37949	0.859721	0.599077	-0.269231	0.468755	0.849619	0.942056	2.42914	1.20725	0.073243	0.311662	1.63559	1.81289	0.660197	1.89573	1.15926	1.5083	1.15168	2.07101	1.54214	1.22341	0.515732	0.87538	-0.00404096	1.01732	1.00671	-0.270747	0.489465
-144	0.522803	-0.545534	1.72651	1.07187	1.30423	0.702628	0.477342	0.200534	-0.757181	0.295498	0.526339	0.456632	1.79117	0.707679	-0.396017	-0.376823	0.948118	1.16482	-0.00656661	1.19815	0.477342	0.990548	0.628374	1.51638	0.903162	0.478858	-1.03449	0.205586	-0.396017	0.970849	0.942562	-0.149012	0.698587
-142	-0.150527	-1.57649	0.777386	0.235893	0.541493	-0.0828404	-0.169722	-0.513711	-1.44061	-0.758696	-0.30459	-0.206596	1.30676	-0.228821	-0.717781	-1.42091	-0.0393997	0.380358	-0.905182	0.333887	-0.395512	0.293982	-0.118199	0.703638	0.0217203	0.20306	-2.98225	-0.450571	-1.26736	0.415717	0.293982	0.26519	1.30474
-140	-0.452591	-2.19274	0.0358638	-0.230337	0.309641	-0.204575	-0.0984992	-0.562203	-1.04056	-1.17744	-0.645043	-0.535432	0.750109	0.0222255	-0.199524	-1.44819	-0.355607	0.0257613	-0.968828	-0.0656661	-0.549575	0.230337	-0.270747	0.319238	-0.30459	0.617767	-2.76404	-0.63191	-1.16431	-0.0399048	-0.14093	0.470776	1.88209
-138	0.0474817	-1.29665	0.231347	0.16366	0.957715	0.48795	0.879421	0.302064	0.436427	-0.509165	0.196493	-0.114158	0.380864	1.26382	0.67131	-0.273777	0.2662	0.350051	-0.0752635	0.312167	0.134868	1.00419	0.464209	0.75213	0.197504	0.946603	-0.331361	-0.148001	0.00555637	0.380864	0.408645	0.216193	1.63054
-136	0.534421	0.32732	0.740007	0.782942	1.69823	1.26433	1.62145	1.00267	1.24261	-0.0621303	0.990548	0.558667	0.125776	1.25877	1.0153	0.403594	0.886493	0.819816	0.619282	0.79557	0.702123	1.74318	1.25018	1.40576	0.933469	0.424809	0.781932	0.378843	0.506134	0.716266	1.00318	-0.110622	0.705658
-134	0.377328	1.21735	0.699092	0.790014	1.58659	1.1628	1.38303	0.803147	0.322774	-0.362679	0.722327	0.536947	0.0287921	-0.14093	0.684948	-0.0904172	0.670805	0.792035	0.396522	0.694546	0.520278	1.66842	1.17593	1.42445	1.05874	-0.417738	-0.18437	0.276303	-0.391976	0.205586	0.710204	-0.0484919	-0.305095
-132	0.117694	1.19765	0.390966	0.262159	0.795065	0.323279	0.746573	0.246501	-0.959231	-0.390461	0.131332	0.209121	0.0409151	-0.976405	0.34601	-0.418748	-0.0146486	0.334897	-0.132343	0.14194	-0.0292972	1.05116	0.517247	0.775871	0.495022	-0.354597	-0.507145	-0.00959736	-1.17593	-0.377833	0.0565739	0.188411	-0.977415
-130	0.36672	1.39212	0.461178	0.228821	0.486435	0.0995094	0.798096	0.481383	-0.703638	0.539978	0.133858	0.482899	0.26317	-0.166186	0.790519	0.461683	-0.069202	0.175278	0.0247511	-0.00858711	0.0156588	0.941046	0.476837	0.462189	0.349041	0.791024	1.21987	0.30661	-0.493506	-0.0782942	-0.0020205	0.0353587	-1.25574
-128	0.48896	2.02807	0.544019	0.763243	0.814765	0.71374	1.3896	1.2128	0.533916	1.46183	0.350051	0.95822	0.584429	1.02894	1.49365	1.55982	0.416222	0.469765	0.59049	0.329846	0.559678	1.3805	1.09056	0.620292	0.856185	1.52396	3.31563	0.679392	0.679392	0.736976	0.406625	-0.265695	-1.2022
-126	-0.151537	1.37141	-0.0141435	0.731925	0.795065	1.03854	1.45577	1.26837	1.06985	1.36586	-0.0631405	0.625344	-0.402584	1.31736	1.31635	1.68004	0.42582	0.40612	0.614736	0.312167	0.625344	1.39061	1.22947	0.438448	0.999641	0.641002	3.43383	0.189422	0.880431	0.785973	0.431376	-0.172247	-0.488455
-124	-0.593016	-0.326815	-0.608675	0.14295	0.447035	0.835475	1.10168	0.881947	0.811229	0.646054	-0.760717	-0.257613	-1.68307	1.05419	0.761727	1.25069	0.0787994	-0.0484919	0.256098	-0.0338433	0.213162	1.05268	0.901647	-0.0186896	0.679392	-0.599077	1.86239	-0.486435	0.367225	0.177299	0.10153	0.028287	0.373792
-122	-0.028287	-0.877401	-0.522298	-0.106076	0.38743	0.601603	0.983477	0.853155	0.411676	0.246501	-0.686969	-0.59049	-0.661713	0.863257	0.892554	1.16987	-0.0141435	-0.269736	0.14396	-0.151032	-0.0515227	0.889018	0.838506	-0.210637	0.406625	-0.239429	0.818301	-0.444004	0.00959736	0.0318228	-0.0227306	-0.146991	0.231347
-120	0.907708	-0.0237408	-0.0484919	0.182855	0.515732	0.540988	1.06581	1.12895	0.208616	0.404604	0.107591	-0.0858711	1.46537	1.45072	1.50173	1.68358	0.0803147	-0.128807	0.255088	0.0106076	-0.0661713	0.857701	1.01681	-0.114158	0.355102	1.2714	1.92099	0.249531	0.00353587	0.453601	0.258118	-0.395512	-0.794055
-118	1.13047	0.776881	0.30358	0.453601	0.495022	0.50765	1.1042	1.14158	0.386925	0.696566	0.73344	0.521793	2.25487	2.26245	1.93412	2.30387	0.0565739	0.115168	0.210637	0.129817	-0.0565739	0.848608	0.962261	-0.0873865	0.42683	2.31599	4.15717	0.841537	0.135373	0.719802	0.6703	-0.294487	-1.49113
-116	0.706669	0.752635	0.352071	0.219729	0.294992	0.247006	0.95721	0.748089	0.644538	0.701617	0.425314	0.461178	1.95635	1.79622	1.96493	2.21699	-0.200534	0.057079	-0.167196	-0.00101025	-0.232862	0.703133	0.483909	-0.24549	0.197504	2.24578	4.48954	0.706669	0.205586	0.333887	0.475827	-0.0459663	-1.49214
-114	0.506134	0.614736	0.355607	-0.0737481	0.247511	-0.0631405	0.902657	0.485929	0.836991	0.515732	-0.209627	0.188411	1.54416	0.654641	1.91139	1.47547	-0.342979	-0.146991	-0.429356	-0.114158	-0.374802	0.575841	0.161135	-0.249026	-0.165681	1.38657	2.0402	0.458653	0.307621	-0.175783	-0.0267716	-0.00555637	-1.55275
-112	0.457137	0.639992	0.366215	-0.20407	0.393997	-0.0712225	1.06026	0.645549	0.841032	0.447035	-0.210637	0.137899	0.99661	-0.463199	1.95635	0.894575	-0.183865	-0.223265	-0.279334	-0.105571	-0.260644	0.684443	0.358133	-0.0767789	-0.255593	0.504619	-1.33656	0.541998	0.301559	-0.178814	-0.0141435	-0.105571	-1.60629
-110	-0.272767	-0.0535432	-0.246501	-0.712225	0.247511	-0.0904172	0.860731	0.620798	0.512701	0.403089	-0.50866	-0.42885	0.131332	-2.00282	1.67449	0.497042	-0.282869	-0.666764	-0.230337	-0.521793	-0.308631	0.56877	0.381874	-0.335402	-0.428345	0.0020205	-3.78793	-0.012123	0.12022	-0.355102	-0.189927	0.0434407	-0.675856
-108	-1.084	-1.16128	-1.22442	-1.44718	-0.228821	-0.515732	0.379348	0.0686969	0.196493	0.208111	-1.32393	-1.39768	-0.249531	-3.32927	1.14865	-0.118704	-0.787994	-1.37545	-0.54806	-1.20119	-0.729399	0.0848608	-0.14194	-0.888008	-0.85265	0.155073	-4.14707	-0.910739	0.00303074	-0.798096	-0.939531	0.369751	0.481383
-106	-0.899121	-1.4487	-1.60629	-1.62852	-0.475827	-0.877906	0.232357	-0.193968	0.143455	0.220234	-1.26433	-1.60377	0.326815	-2.80849	1.05571	-0.228821	-0.984487	-1.53103	-0.58948	-1.31938	-0.909223	-0.185886	-0.475827	-0.991054	-1.05824	1.01934	-2.218	-0.807188	0.0101025	-0.659187	-1.06581	0.256098	0.507145
-104	-0.524824	-0.838001	-1.27089	-1.11127	-0.200029	-0.6309	0.651105	0.413697	0.498052	0.760717	-0.338938	-0.873865	0.665754	-0.191442	1.58003	1.00469	-0.499568	-1.07996	0.0141435	-0.796581	-0.397028	0.0939531	-0.0222255	-0.626354	-0.723843	1.68459	1.29615	-0.0646559	0.335402	-0.216698	-0.113148	-0.231347	-0.297518
-102	-0.723338	-0.0500073	-0.663228	-0.500073	0.288426	-0.178814	1.19714	1.12996	0.950139	1.17845	0.237913	-0.0873865	-0.00555637	2.39378	2.00635	2.43874	0.0843557	-0.485929	0.618777	-0.30661	0.229326	0.580388	0.530885	-0.164165	-0.260139	1.21129	4.61431	0.295498	0.731925	-0.0727379	0.778396	-0.509165	-1.13905
-100	-0.638477	0.422284	-0.544019	-0.346515	0.390966	-0.0550585	1.20826	1.15017	0.852144	0.963777	0.00757686	0.0303074	-0.899626	3.14036	1.64569	2.72413	0.0899121	-0.213162	0.577357	-0.313682	0.293477	0.656156	0.44855	-0.0277818	-0.248521	-0.0575841	5.6291	-0.0454612	0.574326	-0.0444509	0.624839	-0.451581	-1.48153
-98	-0.0697071	0.211647	-0.780417	-0.676866	0.187401	-0.155073	0.909728	0.803147	0.838001	0.717781	-0.415717	-0.465219	-1.22594	2.54835	1.32545	2.19375	-0.240439	-0.478353	0.32429	-0.596046	0.0848609	0.470776	0.0767789	-0.213667	-0.576347	-0.618777	4.04604	-0.625849	0.434912	-0.0358638	-0.22478	-0.334897	-1.11531
-96	0.252562	-0.235388	-0.496032	-1.04864	0.24448	-0.097489	0.997115	0.764758	1.52396	0.941551	-0.538462	-0.598572	-0.89508	1.94877	1.80632	1.64064	-0.271252	-0.800117	0.42885	-0.654641	0.184875	0.593521	0.157599	-0.235388	-0.617767	0.0964787	1.2522	-0.6506	0.987518	-0.246501	-0.491486	-0.359143	-0.395512
-94	-0.0196998	-0.328836	-0.0939531	-1.1532	0.374802	0.081325	1.18805	0.886998	2.06798	1.17391	-0.622818	-0.40713	-0.280849	1.64771	2.169	1.06985	-0.0464714	-0.877401	0.595541	-0.542503	0.375812	0.740512	0.490476	-0.138404	-0.409656	0.91579	-1.33403	-0.40612	1.52042	-0.529875	-0.267716	-0.159114	0.057079
-92	-1.00974	-0.826383	-0.357123	-1.17492	0.0585944	0.00353587	0.805673	0.592005	1.56487	0.789509	-1.01176	-0.701617	0.156588	1.00722	1.64115	0.231347	-0.028287	-0.923872	0.388946	-0.600087	0.241449	0.359143	0.378338	-0.352577	-0.559172	1.0946	-2.96457	-0.954685	1.09006	-0.660197	-0.419253	0.316713	0.338938
-90	-1.91897	-1.48557	-0.797591	-1.05874	-0.376823	-0.0328331	0.188411	0.157599	0.380358	0.0328331	-1.10117	-0.787994	0.627869	-0.128807	0.888513	-0.334392	-0.0979941	-0.841032	0.129817	-0.612715	0.085366	-0.166691	0.157599	-0.720812	-0.656661	1.17946	-3.10702	-1.72197	0.0727379	-0.677877	-0.594026	0.503609	0.619282
-88	-1.54821	-1.25624	-0.725358	-0.639487	-0.234883	0.352577	0.18235	0.258624	-0.146991	-0.32429	-0.215688	-0.210132	1.17795	-0.987518	0.756676	-0.237408	0.247511	-0.490981	0.277818	-0.22478	0.373792	-0.110622	0.328331	-0.665754	-0.22579	1.36485	-1.76036	-1.18805	-0.314692	-0.270747	-0.362679	0.311662	0.763748
-86	-0.434407	-0.93751	-0.521793	-0.32429	0.0363689	0.727379	0.454107	0.606654	0.288426	-0.0889018	0.42784	0.213162	1.04662	-1.53507	0.880431	-0.0353587	0.669289	-0.28388	0.556142	0.158104	0.73243	0.130827	0.607664	-0.448045	0.167196	0.902152	-0.711215	-0.169217	0.132343	0.164165	0.00303074	0.0878916	0.893059
-84	0.0343484	-1.35777	-0.613726	-0.473301	-0.249026	0.69101	0.213667	0.52937	0.676866	0.292467	0.000505124	-0.06112	0.168711	-2.39328	0.447035	-0.104561	0.593521	-0.395007	0.537452	0.114158	0.674846	-0.185381	0.598067	-0.606149	0.168711	-0.159619	-1.5674	-0.165176	0.666259	-0.235893	-0.0621303	0.0722327	0.885483
-82	-0.201545	-1.47597	-0.561698	-0.462694	-0.340454	0.847093	0.024246	0.569275	1.10269	0.900636	-0.172752	-0.535432	-0.454107	-2.48875	0.113653	0.134363	0.607664	-0.241449	0.637972	0.212657	0.715761	-0.328331	0.740512	-0.538462	0.316713	-0.370761	-2.13516	-0.565739	1.36333	-0.653125	-0.336413	0.285395	0.766273
-80	-0.379348	-0.395512	-0.0459663	0.340454	0.247006	1.36434	0.444004	0.983477	2.01444	1.63206	0.300549	-0.077284	-0.339949	-0.596552	0.626859	0.900131	1.15421	0.431881	1.10925	0.796076	1.19007	0.200534	1.14916	0.149517	0.865278	0.599077	0.174773	-0.34702	2.31852	-0.308631	0.158609	0.3253	0.381369
-78	-0.431881	0.809714	0.391976	1.07945	0.520783	1.27746	0.613221	0.850629	2.36752	1.64822	0.30459	0.73445	-0.580893	1.4002	0.885988	1.20876	1.41081	0.844062	1.16027	1.11733	1.27948	0.456632	0.938521	0.564224	1.12895	1.16482	3.03782	0.0419253	2.51249	-0.048997	0.769809	0.118704	-0.152042
-76	-0.249531	0.923872	0.387935	0.906193	0.0914275	0.517247	0.0156588	0.0252562	1.73409	0.79557	-0.232357	0.414707	-1.17744	1.4098	0.161135	0.668784	0.972364	0.664743	0.553111	0.846588	0.736976	-0.0232357	0.105571	0.311156	0.755666	0.700607	3.32523	0.0995094	1.69924	-0.257613	0.192452	0.114158	-0.210132
-74	0.433396	0.575336	0.107591	0.511691	-0.46825	-0.18235	-0.808199	-0.902657	0.898111	-0.611705	-0.678382	-0.105571	-0.845073	0.425314	-0.748594	-0.364194	0.387935	0.341969	-0.228821	0.501083	0.0515227	-0.729904	-0.670805	-0.115673	0.381369	-0.0904173	1.41687	0.187906	0.627364	-0.54907	-0.52937	0.14396	-0.0929428
-72	0.692525	0.657166	-0.0626354	0.490981	-0.717781	-0.345505	-1.24917	-1.32747	0.340959	-1.63004	-0.696061	0.252562	-0.0717276	-0.302569	-1.20826	-1.1436	0.165176	0.218719	-0.778396	0.376823	-0.323785	-1.134	-0.911749	-0.315197	0.436427	-0.85669	-0.596046	0.276303	-0.0146486	-0.52735	-0.288426	0.0338433	-0.151537
-70	-0.167196	0.705153	-0.190937	0.517752	-0.671815	-0.117189	-1.35525	-1.20977	-0.240944	-1.72298	-0.498052	0.676361	0.127796	-0.703133	-1.48658	-1.32999	0.185381	0.234883	-0.925387	0.382379	-0.400563	-1.18047	-0.71374	-0.330351	0.526339	-1.59215	-1.63963	-0.0580893	-0.267716	-0.428345	0.14194	0.0247511	0.0681918
-68	-1.36282	-0.208111	-0.786478	0.149517	-0.773345	-0.097489	-1.64873	-1.39263	-0.992569	-2.10334	-0.707679	0.415717	-0.210132	-0.722327	-1.81643	-1.87603	-0.0116179	0.0596046	-1.10723	0.185381	-0.658177	-1.31433	-0.789509	-0.448045	0.257613	-2.0311	-2.17405	-0.959736	-0.849114	-0.75213	0.259129	0.262665	1.04157
-66	-2.00029	-1.31837	-1.42091	-0.445519	-1.05167	-0.32429	-2.1291	-2.00585	-1.5967	-3.1151	-1.15168	-0.203565	-0.269736	-0.702628	-2.03262	-2.76555	-0.373287	-0.255593	-1.5477	-0.10254	-1.0547	-1.54467	-1.27594	-0.605139	-0.0828404	-1.98514	-2.58169	-1.79521	-1.73056	-1.02086	0.106581	0.658682	1.94473
-64	-1.46031	-0.670805	-0.97489	-0.287921	-0.881947	-0.289941	-2.16951	-2.08515	-1.91088	-3.52678	-1.00015	-0.104561	0.774355	-0.590995	-1.89068	-2.62917	-0.261654	0.0616251	-1.62751	0.185381	-0.991054	-1.34616	-1.33656	-0.220739	0.110622	-1.42445	-1.97807	-1.01681	-2.19527	-0.5718	0.0333382	0.69	1.30928
-62	-0.187401	0.825373	0.361669	0.607159	-0.211142	-0.0787994	-1.74268	-1.56487	-2.20537	-3.32624	-0.0525329	0.654641	1.93715	-0.141435	-1.63862	-1.51739	0.264685	0.932964	-1.29463	0.887503	-0.613221	-0.819311	-0.894575	0.582408	0.611705	-0.838506	0.215183	0.782942	-2.32408	0.252562	0.314187	0.285395	-0.00606149
-60	0.724348	0.919831	1.17643	0.973879	0.0646559	-0.344495	-1.68711	-1.47042	-2.78071	-3.34342	1.06581	0.876895	1.10976	0.485424	-1.95938	-0.730409	0.302064	1.31787	-1.30423	1.04662	-0.707679	-0.69	-0.878411	0.925387	0.508155	-1.1138	2.65948	1.37343	-2.6817	0.506639	0.503104	-0.0232357	-0.38743
-58	0.959736	0.0303074	1.23654	0.691515	-0.081325	-0.815775	-2.06242	-1.7649	-3.1742	-3.42727	1.62145	0.424809	-2.00787	1.30069	-2.56755	-0.443499	-0.0803147	1.08097	-1.61892	0.760212	-1.0158	-0.870834	-1.22594	0.806178	-0.024246	-2.06646	3.77378	0.688989	-2.9767	0.0843557	0.262159	-0.0676866	-0.117694
-56	0.729399	-0.392987	1.28554	0.503609	-0.0323279	-0.81426	-2.12758	-1.70681	-3.16965	-3.25401	1.35424	0.0580893	-5.11691	1.6664	-2.75091	-0.371771	-0.137899	0.925892	-1.58558	0.707679	-0.861742	-0.740007	-1.19916	0.785468	-0.186896	-2.87466	2.45995	0.161135	-2.95548	-0.133858	0.0343484	-0.0959736	-0.000505124
-54	0.420768	0.0666764	1.3113	0.567254	0.20306	-0.483404	-1.78814	-1.32898	-3.04994	-2.8888	0.806178	0.0510175	-5.83671	0.835475	-2.50643	-0.872349	0.0464714	0.931449	-1.26028	0.761222	-0.525329	-0.392481	-0.879421	0.794055	-0.0298023	-3.21309	-0.924882	0.375307	-2.82516	0.181845	0.00808199	-0.30358	-0.203565
-52	0.0929428	0.393492	0.87639	0.486435	0.121735	-0.283375	-1.63711	-1.22392	-2.79839	-2.37055	0.432891	-0.0429356	-4.51177	-1.084	-2.31953	-1.88563	-0.081325	0.658177	-1.22644	0.516742	-0.543514	-0.404099	-0.727379	0.528865	-0.0232357	-3.07014	-4.08393	0.532906	-2.48673	0.234883	-0.345	-0.387935	-0.284385
-50	-0.207606	-0.321259	0.044956	0.0560688	-0.314187	-0.368741	-1.81289	-1.3896	-2.43924	-1.83209	0.020205	-0.432386	-3.44545	-2.62564	-2.47309	-2.45541	-0.464209	0.192957	-1.38808	0.0500073	-0.813755	-0.767789	-0.85467	0.0995094	-0.235388	-2.62513	-5.25632	0.00101025	-2.0311	-0.322269	-0.889018	-0.00404099	0.317218
-48	0.285395	-0.794055	-0.123755	-0.0580893	-0.370761	-0.220739	-1.6659	-1.11127	-1.96291	-1.44061	-0.109612	-0.322774	-2.77869	-1.51487	-2.25841	-1.93362	-0.425314	0.124766	-1.06127	0.0166691	-0.708184	-0.729399	-0.740512	0.0373792	-0.0479868	-1.51386	-3.82328	-0.199019	-1.65075	-0.454107	-0.641002	0.328836	0.944077
-46	1.41384	-0.0146486	0.924377	0.445519	0.170227	0.300044	-0.83295	-0.394502	-1.29463	-1.16987	0.498558	0.434407	-0.0995094	0.950644	-1.06531	-0.906193	0.139414	0.56877	-0.302064	0.527855	-0.0515227	-0.085366	-0.157599	0.524824	0.557152	0.653125	-0.917305	0.562708	-1.26938	0.383389	0.137899	0.00757686	0.627364
-44	1.59872	0.579883	1.69469	0.661713	0.516237	0.36773	-0.0399048	-0.0287921	-0.903162	-0.892049	1.01378	0.582408	4.54006	1.36939	0.187906	-0.38743	0.463199	0.832445	0.137899	0.683433	0.373792	0.387935	0.148001	0.889524	0.616757	2.61856	0.882957	1.08147	-1.02793	1.24463	0.320754	-0.336918	0.162145
-42	0.608675	0.0676866	1.10471	0.206596	0.122745	-0.288426	-0.0702123	-0.322269	-1.14259	-0.796581	0.735966	-0.274788	7.34097	0.065161	0.38642	-0.628879	0.0782942	0.446025	-0.0606149	0.135878	0.0823352	0.131837	-0.351566	0.474817	-0.073243	2.8888	0.995094	0.565739	-1.15269	1.30979	-0.261654	-0.020205	0.159619
-40	-0.192957	0.132848	0.379348	-0.0666764	-0.28388	-0.714245	-0.317218	-0.500073	-1.19159	-0.538967	0.453601	-0.713235	5.80691	-0.606149	-0.131332	-0.683938	-0.439963	0.00707174	-0.18134	-0.291457	-0.238924	-0.241954	-0.811229	-0.0914275	-0.496032	1.85229	1.06733	0.0520278	-1.03197	0.858206	-0.700102	0.178309	-0.332877
-38	0.188411	1.38202	0.470776	0.227306	0.0126281	-0.267716	0.107086	0.132848	-0.308126	0.612715	0.597057	-0.0515227	2.12354	-0.212657	-0.371771	0.0590995	-0.28388	0.111632	0.371771	-0.0596046	0.109107	-0.0136384	-0.311156	0.100015	-0.157599	0.883967	1.24362	0.40511	0.0681918	0.389956	-0.387935	-0.286405	-1.10319
-36	1.02338	1.80683	0.614736	0.232357	0.341464	0.129817	0.616251	0.598572	0.498052	1.66186	0.634941	0.331361	-0.333887	-0.142445	-0.28489	0.261149	0.0510175	0.219729	0.803147	0.148001	0.510175	0.2859	0.261654	0.409656	0.0298023	0.388946	-0.427335	0.932964	1.11026	0.104561	-0.0020205	-0.615746	-1.12643
-34	0.736471	0.740007	-0.0308126	-0.464209	-0.141435	-0.32631	0.402079	-0.00707174	0.274282	1.27847	0.154568	-0.288426	-0.840021	-1.22695	-0.448045	-0.925387	-0.291962	-0.222255	0.460673	-0.290446	0.151032	-0.0474817	-0.0757686	-0.0848609	-0.531391	-0.103045	-3.50859	0.666764	0.884977	-0.24347	-0.206596	-0.241954	-0.359143
-32	-0.387935	0.148001	-0.757686	-0.952159	-0.837496	-0.697576	-0.00808199	-0.621303	-0.249531	0.514721	-0.470271	-0.812745	-0.414707	-2.24982	-0.71172	-1.80834	-0.71374	-0.596046	0.0181845	-0.694546	-0.312167	-0.487445	-0.540988	-0.753645	-0.911244	-0.337423	-4.79211	-0.0146486	0.22579	-0.628879	-0.505124	0.289436	0.386925
-30	-0.485929	1.28655	-0.251552	-0.353587	-0.500073	-0.0378843	0.331361	0.0555637	0.0409151	1.12289	-0.218214	-0.236903	0.130322	-1.51891	-0.351061	-0.869824	-0.155073	-0.100015	0.410161	-0.125271	0.177299	-0.085366	0.012123	-0.378338	-0.269231	0.124766	-2.71757	0.0954685	0.478858	-0.215183	-0.0686969	0.254077	0.0954685
-28	0.320754	2.18719	0.805168	0.548565	0.403594	0.976405	0.982971	1.15623	0.839516	2.19173	0.414202	0.569275	0.253067	0.153053	0.336413	0.737481	0.735966	0.5915	1.11279	0.682423	0.950644	0.658177	1.01934	0.503609	0.668784	0.510175	0.480878	0.615241	1.21028	0.424304	0.480373	-0.119714	-0.578872
-26	0.298528	0.768294	0.682423	0.424809	0.325805	0.906193	0.786478	1.06935	1.00368	1.98564	0.362679	0.26317	0.0262665	0.820827	0.298023	1.13855	0.512701	0.357628	0.875885	0.434407	0.654136	0.528865	0.945592	0.399553	0.684443	0.115673	2.19224	0.108602	1.17694	0.293982	-0.00454612	-0.0818301	-0.233872
-24	-0.0232357	-1.12491	-0.357123	-0.127291	-0.340959	-0.0500073	0.228316	0.283375	0.730915	1.36434	0.374297	-0.0863762	0.179319	0.960241	-0.0803147	0.908213	-0.345505	-0.165176	0.185886	-0.3056	-0.208111	-0.057079	0.0717276	-0.342979	0.0510175	-0.478353	2.60038	-0.751625	0.865278	0.124766	-0.352071	0.300044	0.646054
-22	0.688989	-0.907708	-0.789004	-0.140425	-0.519268	-0.685959	0.0510175	-0.069202	0.577862	1.21179	0.669289	0.477847	0.688989	1.08501	-0.132343	0.925892	-0.768799	-0.247006	-0.109612	-0.613221	-0.570285	-0.219224	-0.34601	-0.668279	-0.377328	-0.93549	2.3655	-0.179824	0.822342	0.257613	0.245995	0.216193	0.430871
-20	1.42293	0.115168	-0.496032	0.0474817	-0.230337	-0.661713	0.139414	0.0272767	0.601603	1.27847	0.439458	0.866288	0.382379	0.707679	-0.0313177	0.863257	-0.703133	-0.161135	-0.106076	-0.516237	-0.424809	0	-0.199019	-0.491486	-0.333887	-1.38101	1.78713	0.827393	0.758696	0.180329	0.75314	-0.136384	-0.335908
-18	0.862752	-0.255593	-0.545534	-0.139414	-0.012123	-0.401574	0.267716	0.0909223	0.520783	1.19613	-0.436932	0.413697	-1.40728	0.0702123	-0.0409151	0.389956	-0.540483	-0.297518	-0.0257613	-0.458148	-0.188916	0.20205	0.00353587	-0.324795	-0.196998	-1.60528	0.537957	0.42582	0.477847	-0.317723	0.586449	0.0146486	-0.0257613
-16	-0.219224	-1.23099	-0.996105	-0.491991	-0.0601098	-0.34601	0.34601	-0.0510175	0.0323279	0.630395	-1.28403	-0.316208	-3.07469	-0.443499	-0.108097	-0.185886	-0.55109	-0.551596	-0.0131332	-0.550585	-0.16164	0.24246	-0.0540483	-0.335908	-0.366215	-1.37646	-1.0845	-0.381874	-0.110117	-0.728389	-0.0646559	0.192957	0.438448
-14	-0.77385	-1.54113	-0.9956	-0.470776	0.0464714	-0.379853	0.501588	0.0565739	-0.200534	0.224275	-1.3608	-0.523814	-3.07671	-0.592511	0.134363	-0.0762737	-0.495022	-0.6112	0.174268	-0.570285	-0.113653	0.3056	-0.0560688	-0.258624	-0.555637	-0.506639	-1.60882	-0.576347	-0.368235	-0.440973	-0.347525	-0.0383894	0.12123
-12	-0.923367	-1.29968	-0.490476	-0.189422	0.322269	-0.269736	0.739502	0.401069	0.113148	0.333382	-0.694041	-0.201039	-1.91038	-0.657672	0.628879	0.312167	-0.310146	-0.544019	0.490981	-0.511691	0.0767789	0.381369	0.148506	-0.100015	-0.534421	0.512701	-1.50679	-0.46724	-0.0823352	0.115673	-0.085366	-0.179824	-0.350556
-10	-0.795065	-0.822847	-0.0424304	0.0889018	0.377833	-0.109612	0.879421	0.532906	0.604128	0.56877	-0.0141435	0.168711	-0.219729	-0.696061	1.04409	0.247006	-0.193463	-0.451581	0.654641	-0.513206	0.214173	0.365205	0.263675	-0.0333382	-0.412181	1.09107	-1.72096	-0.247006	0.416727	0.335908	0.22377	-0.0878916	-0.786478
-8	-0.240439	-0.0191947	0.133858	0.247006	0.242965	0.016164	0.877906	0.477342	1.035	0.602613	0.238419	0.335402	1.75076	-0.394502	1.43455	0.0929428	-0.195988	-0.314692	0.656156	-0.515227	0.239429	0.288931	0.302569	-0.0409151	-0.250542	1.46789	-1.44718	-0.0676866	0.796076	0.288426	0.433396	-0.0540483	-1.02389
-6	0.321764	0.865783	0.00101025	0.124766	-0.0535432	0.0828404	0.786983	0.536442	1.32444	0.482899	0.206091	0.210132	2.44177	0.0954685	1.67247	0.413192	-0.185381	-0.323785	0.62989	-0.544019	0.191947	0.105571	0.342474	-0.146991	-0.178814	1.77501	0.265695	-0.077284	0.920336	0.172752	0.192957	-0.156083	-0.657166
-4	0.380358	1.01732	-0.248521	-0.288931	-0.376317	0.0303074	0.748594	0.874875	1.86593	0.971354	0.155578	-0.0803147	1.4199	0.624333	1.71389	1.12188	-0.0580893	-0.554121	0.791529	-0.595541	0.279334	-0.0697071	0.429861	-0.416222	-0.28489	1.71288	2.24275	-0.124766	1.44819	0.169217	-0.20508	-0.40511	0.0484919
-2	-0.50765	0.16366	-0.558162	-0.766778	-0.652115	-0.215183	0.504114	1.01378	2.28872	1.70176	-0.104561	-0.566749	0.638982	0.42683	1.53962	1.43859	-0.125271	-0.949128	0.826888	-0.734956	0.287416	-0.357123	0.268726	-0.773345	-0.498558	1.23402	2.58927	-0.307621	2.0902	0.188411	-0.466735	-0.416727	0.663228
0	-1.72651	-1.16734	-0.95721	-0.971354	-1.01934	-0.501588	-0.00252562	0.622818	1.9811	1.577	-0.680402	-1.00166	0.843557	-0.281354	1.18502	1.0845	-0.440468	-1.13754	0.473806	-0.896595	0.0298023	-0.799611	-0.167701	-1.04914	-0.629385	0.700102	1.98564	-0.905182	1.88209	-0.0535432	-0.766273	0.119209	1.13552
2	-1.50881	-1.70631	-0.995094	-0.681918	-1.23452	-0.534926	-0.420768	0.20205	1.30625	0.890534	-0.888513	-0.878916	1.68156	-0.195483	0.95519	0.738997	-0.59049	-0.822847	0.186896	-0.759707	-0.148001	-1.02439	-0.40511	-1.1143	-0.552606	0.50967	2.13415	-1.08248	1.15825	-0.310651	-0.730409	0.601098	1.27039
4	-0.50765	-1.10673	-0.729399	-0.2662	-1.15977	-0.404604	-0.617767	0.133858	0.901647	0.523814	-0.552606	-0.149517	2.37408	0.345	0.881947	0.741522	-0.51068	-0.52735	0.14093	-0.461178	-0.180834	-1.08652	-0.382379	-1.06733	-0.288931	0.600087	2.78626	-0.747584	0.844062	-0.224275	-0.24448	0.434407	1.17138
6	-0.61019	-0.733945	-0.819311	-0.291962	-1.24008	-0.426325	-0.882957	0.0641508	0.67131	0.415212	-0.511186	0.624839	0.981961	0.3253	0.573821	0.661207	-0.515732	-0.665754	-0.028287	-0.467745	-0.309641	-1.38101	-0.423799	-1.24665	-0.18336	0.364195	1.7841	-1.10269	0.767283	-0.32631	0.326815	0.225285	1.34818
8	-1.33605	-1.25927	-1.27645	-0.699597	-1.74874	-0.718792	-1.50022	-0.51068	-0.0166691	-0.257613	-0.976405	0.593521	-2.38722	-0.704648	-0.212657	-0.154568	-0.891039	-1.01429	-0.596046	-0.85467	-0.73344	-1.91846	-0.829414	-1.68105	-0.528865	-0.636962	-1.4199	-1.78309	0.0333382	-1.05015	0.398543	0.464714	1.43001
10	-1.2719	-1.76591	-1.48203	-0.781932	-2.12556	-0.903667	-2.04222	-1.17845	-0.867803	-1.03045	-1.18502	-0.0984992	-4.66785	-1.66135	-0.910234	-1.19613	-1.14916	-1.10168	-1.15825	-1.09763	-1.15168	-2.28922	-1.33504	-1.77248	-0.723843	-1.46688	-3.74903	-1.39869	-0.928418	-1.50022	-0.139414	0.504619	0.908718
12	-0.421779	-1.22644	-1.04258	-0.106076	-1.73359	-0.619787	-1.99221	-1.17088	-0.886998	-0.843052	-0.963272	-0.331361	-4.16172	-1.04207	-0.954179	-1.34211	-0.71071	-0.617767	-1.12239	-0.674846	-0.980951	-2.05333	-1.30928	-1.15219	-0.281859	-1.24109	-3.50051	-0.0550585	-0.960746	-1.13602	-0.456632	-0.0686969	0.0944582
14	0.426325	0.259634	0.186896	0.893565	-0.764253	0.0126281	-1.40425	-0.584934	-0.0439458	0.0596046	-0.477847	0.174268	-2.21952	0.00808199	-0.503104	-0.846083	0.179824	0.254077	-0.485929	0.295498	-0.316713	-1.30777	-0.723843	-0.0444509	0.494011	-0.575841	-2.66756	1.08753	-0.0596046	-0.449055	-0.0247511	-0.59049	-0.573316
16	0.554121	0.993579	1.19512	1.23452	-0.187906	0.423799	-0.97691	-0.470271	0.719802	0.268221	-0.0590995	0.373287	-0.993579	-0.65161	-0.166691	-1.13754	0.741522	0.867803	-0.0399048	0.909728	0.06112	-0.867803	-0.390966	0.657672	0.888513	-0.293477	-2.53269	0.742027	0.702628	-0.108097	0.26418	-0.377833	-0.263675
18	0.210132	0.679392	1.29413	1.13047	-0.0404099	0.667774	-0.85366	-0.720307	1.01479	-0.323785	0.0929428	0.211142	-0.904677	-1.97504	-0.0767789	-1.89422	0.925892	1.15673	0.089407	1.12845	0.191442	-0.763243	-0.325805	0.757181	1.03146	-0.0984992	-2.43268	-0.336413	0.79355	-0.0383894	0.0388946	0.0858711	0.607159
20	0.462189	0.491991	1.38909	1.42496	0.352071	1.13552	-0.601603	-0.501588	1.01479	-0.314692	0.490476	0.46623	-0.586449	-1.50881	-0.0196998	-1.67348	1.26988	1.54265	0.36672	1.55427	0.560688	-0.520278	0.0606149	0.927913	1.45274	0.262159	-2.13112	-0.20407	0.777891	0.2859	0.0702123	-0.0383894	0.540483
22	0.886493	0.174268	1.39768	1.56437	0.505629	1.22846	-0.575336	-0.330351	0.738491	0.0348536	0.93549	0.465724	0.0793045	-0.0510175	-0.195483	-1.06228	1.43556	1.58457	0.358638	1.72247	0.700102	-0.553111	0.24347	0.978931	1.62347	0.375812	-1.44112	0.588975	0.777386	0.540483	0.259129	-0.3647	0.294487
24	1.00116	-0.233367	0.952159	1.18351	0.06112	0.81527	-1.07743	-0.763748	0.0889018	-0.374297	0.786983	0.285395	-0.0378843	0.807693	-0.845073	-1.15017	1.14562	1.24917	-0.101025	1.42041	0.329846	-1.03651	-0.162145	0.656156	1.40172	-0.00757686	-0.273777	0.807188	0.436932	0.538462	0.421273	-0.191442	0.938521
26	1.29261	-0.0798096	0.500578	0.994589	-0.378843	0.532401	-1.64367	-1.32343	-0.6309	-1.26837	0.421779	0.829414	-0.575336	0.970849	-1.65226	-1.78612	0.749099	1.10117	-0.553111	1.1532	-0.115673	-1.45829	-0.579377	0.436427	1.26837	-0.613221	0.123755	0.598067	-0.124261	0.515732	0.691515	0.179319	1.55275
28	1.98564	0.656156	0.432891	1.28352	-0.294487	0.44754	-1.78157	-1.59064	-1.08097	-2.00938	0.369246	1.42647	-0.462694	0.288426	-1.96594	-2.38116	0.653631	1.22594	-0.746068	1.17896	-0.236903	-1.40172	-0.700607	0.708184	1.18805	-0.979941	-0.377833	0.647569	-0.610695	0.391976	0.610695	0.044956	0.993074
30	2.60947	1.57447	1.08854	1.88967	0.352577	0.512701	-1.46082	-1.49264	-1.46789	-2.42207	0.50967	1.43051	-0.0868813	-0.498052	-1.61993	-2.52562	1.04712	1.64923	-0.595541	1.57902	0.0580893	-0.822847	-0.554626	1.41485	1.31029	-0.848103	-0.477342	1.30979	-1.1037	0.405615	0.375307	-0.474817	-0.0671815
32	1.96847	1.6755	1.78511	2.32761	0.872854	0.657166	-1.19967	-1.40374	-2.07252	-2.7504	0.719297	1.09359	0.349041	-0.638477	-1.32292	-2.40944	1.44617	1.99524	-0.470271	1.95837	0.279839	-0.379853	-0.414707	1.88916	1.60781	-0.397028	0.150527	1.50325	-1.75884	0.714751	0.460168	-0.571295	-0.00252562
34	0.281859	0.727884	1.63711	1.97453	0.605644	0.585944	-1.45425	-1.7543	-2.64432	-3.13632	0.623828	0.505629	0.966808	-0.757181	-1.61135	-2.62159	1.20674	1.75581	-0.73243	1.75278	0.0126281	-0.665754	-0.703133	1.57094	1.49921	-0.150527	0.483404	0.838506	-2.27912	0.801127	0.265695	-0.144465	1.08248
36	0.161135	0.643023	1.58205	1.68812	0.378843	0.59049	-1.49668	-1.91392	-2.31599	-3.01357	0.65262	0.551596	1.54113	-0.784963	-1.60427	-2.98781	0.991054	1.6164	-0.794055	1.4987	-0.124261	-0.866793	-0.876895	1.15926	1.30928	0.0959736	-0.14295	1.03702	-1.93867	0.920336	-0.0484919	-0.214678	1.18906
38	2.29276	1.84067	2.2276	2.317	0.93751	0.876895	-0.759707	-1.37899	-1.27241	-2.44379	1.56336	1.59417	2.10839	0.287416	-0.907203	-3.12268	1.50022	2.12455	-0.206596	1.91745	0.400563	-0.195483	-0.418243	1.49264	1.64418	0.590995	-1.39061	2.5135	-1.05925	1.50325	0.460673	-0.881947	0.168206
40	3.69498	1.9715	2.22255	2.60846	1.30423	0.824868	-0.251047	-1.0547	-0.829919	-2.35842	2.16193	1.76036	1.9614	1.19664	-0.555131	-3.43282	1.82198	2.32206	0.231852	2.22406	0.804158	0.392481	-0.113653	1.79016	1.75329	0.725863	-2.97922	3.19188	-0.790014	1.41738	0.881442	-1.0158	0.34399
42	3.15753	1.0158	1.18401	1.92907	0.889524	0.459158	-0.445519	-1.34616	-1.15724	-2.62614	1.56184	0.487445	1.1537	0.0782943	-0.745058	-3.84905	1.44971	1.71793	0.117189	1.89422	0.583418	0.188411	-0.345	1.39768	1.32898	0.437943	-3.71771	2.36196	-1.18805	0.506134	0.107591	-0.627869	1.45274
44	2.10889	0.954179	0.803147	1.60377	0.668279	0.583923	-0.525834	-1.33555	-1.35171	-2.23366	1.12542	-0.213162	0.587459	-1.65176	-0.927408	-3.39241	1.30019	1.34868	0.065161	1.77854	0.459158	0.0156588	-0.353587	1.17795	1.31686	0.160124	-1.89472	1.53962	-1.32999	0.209627	-0.621808	-0.525834	1.39212
46	1.53154	1.33454	1.64014	2.06192	1.00722	1.14764	-0.218214	-0.753645	-1.10875	-1.12239	1.44718	0.53038	0.200029	-1.51133	-0.925387	-2.22507	1.58104	1.57599	0.313177	2.0897	0.695556	0.316713	0.0914274	1.42698	1.82552	-0.0757686	0.846588	1.45375	-0.83295	0.586449	-0.057079	-0.687979	0.561698
[truncated: 477 more rows]

## Sheet: 15
	FP1	FP2	F3	F4	C3	C4	P3	P4	O1	O2	F7	F8	T3	T4	T5	T6	CZ	FZ	PZ	FCZ	CPZ	CP3	CP4	FC3	FC4	TP7	TP8	FPZ	OZ	FT7	FT8	A1	BP1
[truncated: 601 more rows]

[truncated: 7 more sheets: 18, 20, 23, 27, 32, 34, 37]
