# Supplementary material for: Sustained attention in skilled and novice martial arts athletes: a study of event-related potentials and current sources
Source: PeerJ. 2016 Jan 26;4:e1614. doi: 10.7717/peerj.1614 (PMC4741076; doi:10.7717/peerj.1614)
Supplement: Supplemental Information 2 — CPT nontarget ERPs novice. [file peerj-04-1614-s002.xls]

## Sheet: 16
	FP1	FP2	F3	F4	C3	C4	P3	P4	O1	O2	F7	F8	T3	T4	T5	T6	CZ	FZ	PZ	FCZ	CPZ	CP3	CP4	FC3	FC4	TP7	TP8	FPZ	OZ	FT7	FT8	A1	BP1
-200	-0.542899	-1.22984	-0.963608	-1.26908	-0.429153	-0.0546376	0.51707	0.119209	1.83682	-0.538429	-0.112752	-0.641247	-0.628332	0.0566244	0.693401	0.0342727	0.175834	-0.996888	0.625849	-0.830988	0.637273	-0.00496705	0.296533	-1.13348	-0.563761	-0.510116	-0.177821	-1.10318	0.923375	-0.669062	-0.121196	-0.0804663	4.96755
-198	-0.152985	-0.772377	-0.6785	-0.794232	-0.237425	0.321865	0.635783	0.350177	1.45137	-0.634293	-0.0278155	-0.293056	-0.451008	0.0705322	0.755489	0.0531475	0.448525	-0.542899	0.797709	-0.419716	0.846883	0.132124	0.633796	-0.654658	-0.192722	-0.0973543	-0.112255	-0.772874	0.659128	-0.503659	-0.0581145	-0.0526508	4.22001
-196	0.0938773	-0.34521	-0.313421	-0.586112	-0.0620882	0.525514	0.59853	0.507136	0.867248	-0.68893	0.0586112	-0.101328	-0.583132	0.0312924	0.700355	0.0114242	0.631313	-0.293056	0.941257	-0.103315	1.02272	0.285109	0.820557	-0.309447	-0.0655651	0.268718	0.0367562	-0.55929	0.341237	-0.584126	-0.120203	0.199179	3.76403
-194	0.526508	0.381966	-0.394384	-0.299017	0.299017	0.755489	0.760953	0.817577	0.763436	-0.350674	0.309944	0.271201	-0.331799	0.339746	0.816584	0.197192	0.90301	-0.100831	1.27753	0.195205	1.27057	0.576675	1.04606	-0.0730157	0.0829498	0.5126	0.253816	-0.0089407	0.438094	-0.138084	-0.0804663	0.264744	3.05126
-192	0.935793	0.861287	-0.964602	0.0740091	0.666579	0.890593	0.957151	1.07139	0.967582	0.0317892	0.311434	0.796219	0.0715256	0.448525	0.950694	0.429153	1.13547	0.0988444	1.56065	0.499686	1.45733	0.859797	1.22239	0.195205	0.315905	0.47634	0.366072	0.444551	0.701845	0.988444	0.167886	0.159939	2.25405
-190	0.432134	0.397861	-1.15434	0.135104	0.825524	0.737111	0.917912	0.985463	0.931323	0.0605981	-0.482798	0.676513	0.547866	0.128647	0.924865	0.404318	1.19607	0.186265	1.42256	0.666082	1.41213	0.933806	1.14689	0.708302	0.331302	0.277162	0.336766	0.077486	0.676513	1.55022	0.0879169	0.356634	2.51085
-188	-1.01527	-0.473857	-0.664095	0.0094374	0.781318	0.437597	0.692904	0.668565	0.430147	-0.210106	-1.51147	-0.0486771	1.19656	-0.159939	0.729163	0.0283122	1.16279	0.157952	1.04258	0.7237	1.25021	0.783801	0.855823	1.10815	0.16739	0.353654	0.12964	-0.744065	0.353654	0.925362	-0.310441	0.741581	3.38753
-186	-1.75784	-0.42965	0.12815	0.455976	0.941753	0.56227	0.807643	0.774364	0.277658	0.0163913	-1.07835	-0.0461936	1.97391	0.0849366	0.861287	-0.0824531	1.45386	0.565251	1.13	0.994404	1.4027	0.832478	0.834465	1.20103	0.382463	1.01527	0.055631	-0.779331	0.408789	0.453989	-0.104805	0.589589	3.24398
-184	-1.44492	0.0566244	0.573695	0.996888	1.01725	0.803173	0.837445	0.930329	0.0233452	0.452995	-0.013411	0.448525	2.42094	0.213087	0.842909	-0.0630816	1.54674	0.925859	1.28448	1.18365	1.45435	0.868738	0.825028	1.1151	0.704328	1.50253	-0.00546376	-0.386437	0.495712	0.391404	0.332296	0.0645717	2.29379
-182	-0.811617	0.265241	0.479321	0.994901	0.356138	0.655651	0.255803	0.539422	-0.774364	0.323852	0.0566244	0.479321	2.12143	-0.446041	0.16739	-0.437597	0.847379	0.622869	0.838439	0.780324	0.953178	0.38296	0.488261	0.479321	0.734627	1.07785	-0.344217	-0.280142	0.0700355	-0.1659	0.161429	-0.120203	1.34607
-180	-0.188251	0.508626	0.522037	0.889103	-0.378489	0.514587	-0.222524	0.181297	-1.00036	0.0466903	-0.0129143	0.246366	1.28001	-1.15633	-0.34074	-0.829498	0.127157	0.266234	0.319878	0.242889	0.418226	-0.119209	0.296036	-0.394881	0.797212	0.259777	-0.597537	-0.0754992	-0.233452	-0.680983	-0.269711	-0.0263254	0.782311
-178	0.156462	0.596543	0.85334	0.840922	-0.419716	0.5126	-0.170867	0.296533	-0.500182	0.17335	0.249843	0.192722	0.525018	-1.02371	-0.332793	-0.775854	-0.016888	0.199179	0.240405	0.0700355	0.175337	-0.166893	0.419219	-0.510613	0.804166	-0.152489	-0.419716	0.258783	-0.00347694	-0.353654	-0.358621	0.0109275	0.76741
-176	0.0804663	0.280142	0.683467	0.708302	-0.0680486	0.607967	0.168383	0.698368	0.191232	0.830491	-0.104308	0.222524	0.0521541	-0.315905	-0.00695388	-0.318885	0.113249	0.225504	0.475844	0.0635783	0.161926	0.0402331	0.582635	-0.0352661	0.601013	-0.0576178	-0.107785	0.256797	0.625849	-0.0605981	-0.0794729	-0.0819564	0.889103
-174	-0.610451	-0.186265	-0.160933	0.510613	0.0417233	0.744561	0.301003	0.892083	0.486275	1.34806	-1.03166	0.0750025	-0.915925	0.17037	0.132124	0.0675519	0.104805	0.222524	0.530978	0.0178814	0.16739	0.0948707	0.638763	0.0432134	0.540912	-0.0953674	-0.104308	-0.228484	0.993411	-0.368059	0.0814597	-0.0243386	1.22587
-172	-1.23829	-0.230968	-0.740588	0.522534	-0.0317891	0.777841	0.119706	0.734627	0.127653	1.18365	-1.28051	0.200172	-2.18848	0.407795	-0.210106	0.137587	0.0501672	0.380476	0.274181	0.189245	0.144541	-0.0104308	0.621875	-0.148018	0.830491	-0.356138	-0.227988	-0.612934	0.676513	-0.635286	0.272691	0.236928	1.62522
-170	-0.962118	0.230471	-0.477831	0.833968	0.207623	0.807146	0.175337	0.656148	-0.158449	0.859797	-0.421206	0.642737	-2.38965	0.587106	-0.265737	0.245372	0.296533	0.763933	0.238915	0.613431	0.292559	0.0844399	0.606477	0.164409	1.12504	-0.347694	0.0238419	-0.409285	0.215073	-0.458956	0.613431	0.317891	1.46081
-168	-0.226001	0.582139	0.0283122	0.998378	0.504653	0.677506	0.271698	0.562767	-0.365078	0.649691	0.34521	0.737607	-1.61529	0.441571	-0.0794729	0.331799	0.496705	0.909964	0.308951	0.821551	0.399848	0.236928	0.450015	0.758469	1.08331	-0.233948	0.255307	0.183781	-0.135104	0.0456969	0.831981	0.145535	0.891586
-166	0.0759959	0.461439	0.110765	0.904997	0.337263	0.38296	0.00844399	0.279148	-0.889103	0.453492	0.17484	0.551343	-0.923375	0.055631	-0.374516	0.130634	0.371536	0.706315	0.0710289	0.746548	0.234445	0.0307957	0.146031	0.890096	0.912944	-0.333289	-0.114739	0.564257	-0.469883	0.181794	0.803173	0.0740091	0.81261
-164	0.146528	0.255803	0.117222	0.840425	0.0312924	0.341733	-0.21706	0.0854333	-1.02272	0.445048	-0.0879169	0.435114	-0.665585	-0.236432	-0.734131	-0.221531	0.313421	0.623862	-0.200669	0.747542	0.104805	-0.185271	-0.0114242	0.587602	0.875692	-0.352164	-0.577172	0.693897	-0.4222	-0.34074	0.609954	0.106792	1.09822
-162	0.443061	0.0968575	0.319382	0.621378	-0.0670552	0.239412	-0.256797	-0.114242	-0.709792	0.363092	0.16739	0.116229	-0.583132	-0.573695	-0.757972	-0.530481	0.268718	0.599027	-0.371536	0.718733	-0.00844399	-0.129143	-0.168383	0.172357	0.647704	-0.161429	-0.671546	0.653664	-0.255803	-1.18911	0.317395	-0.0278155	0.839432
-160	0.545879	0.0307957	0.713269	0.366569	-0.137587	-0.169377	-0.378986	-0.358125	-0.888109	-0.0521541	0.793238	-0.205636	-0.354648	-0.834465	-0.761946	-0.621378	0.0417233	0.42518	-0.653664	0.59704	-0.259777	-0.159939	-0.498195	-0.246366	0.202159	0.00645717	-0.598033	0.450512	-0.63777	-1.281	-0.0397364	-0.25034	0.0198682
-158	0.527501	0.407298	1.28498	0.600517	-0.219544	-0.226498	-0.391404	-0.406802	-1.22041	-0.219047	1.60138	0.278155	-0.113249	-0.404318	-0.626345	-0.389914	0.0208616	0.498195	-0.843406	0.651181	-0.357628	-0.228484	-0.601013	-0.420709	0.312428	0.0988444	-0.350674	0.658135	-0.947217	-0.13262	-0.0158946	-0.456969	-0.763933
-156	0.649194	0.612438	1.59393	0.849863	-0.12219	0.0357628	-0.12517	-0.313421	-0.806153	0.102321	1.79758	0.613431	-0.0938773	0.199676	0.0521541	-0.163913	0.12219	0.738601	-0.813603	0.758469	-0.319382	0.00198682	-0.4222	-0.228981	0.804166	0.21408	-0.276665	0.833472	-0.534952	0.471373	0.146528	-0.425676	-0.718733
-154	0.890593	0.501672	1.40617	0.708799	0.0794729	0.220537	0.199179	-0.157952	0.0551343	0.463923	1.27802	0.121693	0.116229	0.237922	0.626842	-0.0223517	0.100831	0.698865	-0.719229	0.708799	-0.38594	0.242889	-0.277658	0.0948707	0.94672	0.215073	-0.443558	0.564257	0.0605981	0.564754	-0.0417233	-0.137091	-0.21259
-152	1.30335	0.608464	0.970562	0.67999	0.234445	0.341733	0.398358	0.0804663	0.825028	0.796715	0.77486	0.0745058	0.790755	0.140568	0.453492	0.378986	0.119706	0.51409	-0.535448	0.643233	-0.373026	0.290573	-0.158946	0.231465	0.791748	0.0283122	-0.289579	0.479817	0.404318	1.4315	0.0149012	0.0149012	-0.21408
-150	1.50154	0.615915	0.441571	0.626842	0.373522	0.247856	0.557303	0.205636	1.39872	1.08778	0.120699	0.408789	1.12355	0.337263	0.309944	0.795722	0.0675519	0.317395	-0.378986	0.540415	-0.304977	0.394881	-0.0685453	0.164409	0.55035	0.0193715	0.17484	0.46442	0.661115	1.59095	0.403821	-0.0089407	-0.515083
-148	0.975033	0.0705322	-0.153482	0.147521	0.469883	-0.0581145	0.673036	0.0963608	1.55568	1.27753	-0.738601	0.124673	0.396371	0.530978	0.575682	0.868241	-0.185768	-0.0109275	-0.3467	0.302494	-0.394384	0.531971	-0.094374	0.220537	0.247856	0.373522	0.567238	0	0.884632	0.362098	0.486275	0.111262	-0.307957
-146	-0.0908971	-0.756482	-0.662605	-0.438094	0.416239	-0.29554	0.582139	-0.0496705	1.16726	1.32422	-1.22041	-0.584622	-0.765423	0.492732	0.529488	0.799696	-0.498692	-0.368059	-0.419716	-0.134607	-0.570218	0.34521	-0.215073	0.285606	-0.0829498	0.546376	0.707805	-0.606974	0.821551	-0.358125	0.206629	0.323852	0.328819
-144	-1.00782	-1.06742	-1.26362	-0.72966	-0.0347694	-0.50813	0.243882	-0.21855	0.547369	1.0704	-1.24127	-0.731647	-1.23829	0.365575	-0.0357628	0.704328	-0.858307	-0.750025	-0.667075	-0.719229	-0.858804	-0.2111	-0.486275	-0.153482	-0.345707	0.0104308	0.55035	-0.914435	0.364085	0.162919	0.0278155	0.231465	0.316898
-142	-1.05153	-0.654658	-1.6883	-0.596543	-0.492235	-0.709295	0.0526508	-0.255307	0.463426	0.909467	-0.849863	-0.136594	-0.633299	0.280142	-0.318885	0.771383	-0.991424	-1.03513	-0.707805	-1.0853	-0.993907	-0.533462	-0.642737	-0.726183	-0.415742	-0.593563	0.441571	-0.758469	0.119706	0.586112	0.100334	-0.0397364	-0.34372
-140	-0.411769	-0.34074	-1.39276	-0.436604	-0.536938	-0.740588	0.194709	-0.0442068	1.01527	1.21593	-0.359615	0.234445	0.324349	0.0720223	-0.0695387	1.07636	-0.876188	-1.08729	-0.418723	-1.09424	-0.772377	-0.374019	-0.485778	-0.9045	-0.410279	-0.575682	0.595053	-0.373522	0.520051	0.114242	0.0769893	0.00298023	-0.714759
-138	0.286599	-0.277162	-0.964105	-0.385443	-0.419219	-0.504653	0.409782	0.245372	1.49359	1.77125	-0.361105	0.180801	0.915925	-0.118713	0.322858	1.37637	-0.743568	-0.98298	-0.145038	-0.950197	-0.369052	-0.110765	-0.194212	-0.847379	-0.364582	-0.143051	0.818074	0.0327826	1.11759	-0.537435	0.0139078	0.0844399	-1.09822
-136	0.590583	-0.148515	-1.0704	-0.328322	-0.434617	-0.133614	0.613928	0.596543	1.75883	2.29726	-0.658631	0.0710289	1.15087	0.226498	0.717739	1.74443	-0.522037	-0.888606	0.183284	-0.899037	-0.0243386	-0.00496705	0.142058	-0.920892	-0.286599	0.218054	1.11759	0.163416	1.47323	-0.635783	0.0362595	-0.00447035	-1.70966
-134	0.132124	-0.318885	-1.50998	-0.489255	-0.64224	-0.0392397	0.668565	0.745058	1.78466	2.26001	-0.86079	-0.286102	1.06543	0.525514	0.953674	1.92076	-0.427663	-1.03861	0.391404	-1.06643	0.12368	-0.0427167	0.284612	-1.13199	-0.499189	0.257293	1.10169	-0.182291	1.41958	-0.42518	-0.147521	-0.0278155	-1.90735
-132	-0.483294	-0.565747	-1.59343	-0.778834	-0.864764	-0.310441	0.407298	0.360111	1.39177	1.52836	-0.880162	-0.768403	0.68148	0.157456	0.693401	1.5522	-0.716249	-1.34706	0.137091	-1.28895	0.0625849	-0.198682	0.0213583	-1.24623	-0.795722	-0.0566244	0.577668	-0.548363	1.03662	-0.50962	-0.358621	0.00298023	-1.98136
-130	-0.774364	-0.696878	-0.885626	-0.936786	-1.08778	-0.59406	-0.143051	-0.241399	0.634293	0.663102	-0.822047	-1.20401	0.0476837	-0.189245	-0.17633	0.963608	-0.988444	-1.48018	-0.313421	-1.36644	-0.180304	-0.530481	-0.397861	-1.44492	-0.922879	-0.76741	0.227491	-0.717243	0.504156	-0.93778	-0.42369	0.260274	-1.8994
-128	-0.866751	-0.77486	0.317891	-0.81559	-0.951688	-0.502169	-0.307957	-0.351171	0.318885	0.410775	-0.759463	-1.35551	-0.656645	0.0591079	-0.584622	0.724196	-0.788271	-1.15236	-0.268718	-1.07189	-0.160436	-0.499189	-0.383953	-1.38531	-0.875195	-1.07884	0.516574	-0.59853	0.413756	-1.23233	-0.333289	0.55184	-1.56015
-126	-0.675519	-0.282129	1.22736	-0.304977	-0.266234	-0.0889103	0.204643	0.135601	0.839432	0.689924	-0.487268	-0.749528	-0.928839	0.660121	0.0844399	1.00732	-0.21557	-0.428657	0.281135	-0.481804	0.291566	0.055631	0.0392397	-0.630319	-0.627836	-0.497699	0.977019	0.0188748	0.716746	-0.873208	0.00496705	0.262757	-1.86016
-124	-0.765423	0.156959	0.525514	-0.112752	-0.094374	-0.0685453	0.223517	0.158946	0.795225	0.359118	-0.282625	-0.0889103	-0.875195	0.839929	0.296533	0.987947	-0.117222	-0.161429	0.278652	-0.30001	0.314415	0.145038	0.055631	-0.320872	-0.566741	-0.145038	0.900527	0.394881	0.3467	-0.30448	-0.0327826	-0.167886	-2.47012
-122	-1.29888	-0.330309	-1.33961	-0.582139	-0.494719	-0.473857	-0.363588	-0.352661	0.343223	-0.332296	-0.415246	-0.149508	-0.965099	0.350674	-0.20961	0.527004	-0.471373	-0.553827	-0.181794	-0.582635	-0.121196	-0.262757	-0.380476	-0.543892	-0.786285	-0.517567	0.460446	-0.133117	-0.136097	-0.473857	-0.493228	-0.0213583	-1.96646
-120	-1.10467	-0.907977	-2.16266	-0.929832	-0.466903	-0.602504	-0.531475	-0.412265	0.60449	-0.348687	-0.450015	-0.282129	-0.826021	-0.204146	-0.325342	0.410279	-0.468393	-0.683467	-0.182788	-0.622869	-0.218054	-0.383457	-0.5126	-0.102818	-0.840922	-0.929336	0.25183	-0.844896	0.13262	-1.19011	-0.524024	0.303487	-0.970066
-118	-0.258287	-0.872711	-1.69178	-0.951688	-0.313421	-0.56078	-0.406802	-0.163416	1.07735	-0.0804663	-0.219544	-0.250836	-0.0630816	-0.514587	-0.0680486	0.516077	-0.263751	-0.452995	-0.0094374	-0.392894	-0.0824531	-0.324845	-0.319878	0.42667	-0.77188	-0.944734	0.229975	-0.990927	0.553827	-1.28647	-0.274678	0.277658	-1.04556
-116	-0.00248353	-0.499189	-0.769893	-0.822544	-0.358621	-0.465413	-0.452499	-0.0347694	0.93629	0.0675519	-0.137091	-0.226994	0.38147	-0.461936	-0.0144045	0.55631	-0.13113	-0.190238	0.0139078	-0.191728	-0.0104308	-0.358621	-0.110269	0.30448	-0.671049	-0.635286	0.247856	-0.655154	0.617902	-0.712276	-0.155469	0.140568	-1.69923
-114	-0.323852	-0.287592	0.335276	-0.620385	-0.228484	-0.149508	-0.702838	0.0094374	-0.038743	-0.118216	-0.233948	-0.314911	-0.549356	-0.0427167	-0.313421	0.603994	-0.0293056	0.0516574	-0.00248353	-0.0208616	0.0193715	-0.409285	0.0571211	0.191728	-0.435611	-0.397861	0.255803	-0.226994	0.0710289	-0.334283	-0.203649	0.184774	-1.95503
-112	-0.480811	-0.151495	1.42654	-0.406305	0.13411	0.133614	-0.862281	0.0114242	-1.0108	-0.566244	-0.0173847	-0.39041	-1.9754	0.674526	-0.590583	0.672042	0.0089407	0.290573	-0.0908971	0.109275	0.0750025	-0.320872	0.201166	0.514587	-0.182291	-0.482798	0.366072	-0.00248353	-0.590583	-0.519554	-0.181297	0.158449	-2.1557
-110	-0.383457	0.244876	2.14477	-0.0193715	0.519057	0.334779	-0.676016	0.141064	-1.17421	-0.647207	0.298023	0.0899037	-2.24064	1.59442	-0.613928	0.852346	0.207126	0.519554	0.0412265	0.226994	0.264247	-0.0367562	0.403821	0.791748	0.013411	-0.501672	0.876188	0.0536442	-0.717739	-0.464916	0.452499	-0.152489	-2.60125
-108	-0.741084	0.0680486	1.75734	-0.119209	0.337263	0.12219	-0.726183	0.0228484	-1.07735	-0.784795	-0.218054	0.0526508	-1.60784	1.81347	-0.719229	0.627339	0.0948707	0.133117	0.0283122	-0.103315	0.0586112	-0.0958641	0.271698	0.412265	-0.323852	-0.39041	1.05898	-0.360608	-0.776351	0.260274	0.498692	-0.451505	-2.76168
-106	-1.22239	-0.843406	0.698865	-0.866751	-0.424186	-0.637273	-1.33912	-0.654658	-1.37587	-1.51942	-0.960131	-0.848373	-1.1156	1.00583	-1.07636	-0.235438	-0.614425	-0.772874	-0.582635	-0.836452	-0.699361	-0.706812	-0.424186	-0.392397	-1.09126	-0.550846	0.275175	-1.01676	-1.14242	0.59704	-0.308454	-0.335773	-2.25604
-104	-0.708799	-1.12851	0.495712	-1.08182	-0.663598	-0.876685	-1.60336	-1.0699	-1.52985	-2.00917	-0.6785	-1.09226	-0.782808	0.338753	-1.10219	-0.667075	-0.961622	-1.01328	-0.924865	-1.0103	-1.02719	-0.932316	-0.744561	-0.589093	-1.27057	-0.622372	-0.29852	-0.836452	-1.21643	0.478327	-0.38296	0.0705322	-1.5383
-102	0.357628	-0.573695	1.04159	-0.60002	-0.0347694	-0.331302	-1.03315	-0.692407	-0.920892	-1.69426	0.133117	-0.695884	-0.552833	0.314415	-0.386437	-0.226498	-0.454982	-0.407298	-0.484784	-0.506143	-0.607967	-0.433127	-0.315905	0.0392397	-0.742078	-0.127653	0.199179	0.0119209	-0.789762	0.574191	0.0124176	0.255307	-1.27057
-100	0.961125	0.180304	1.09971	0.0382463	0.573198	0.359615	-0.42518	-0.157456	-0.124176	-1.17123	0.692407	-0.209113	-0.480314	0.351171	0.373522	0.273188	0.203649	0.335276	-0.0298023	0.103811	-0.118216	0.117719	0.212093	0.651181	0.0158946	0.516574	0.870228	0.783801	-0.321368	0.589093	-0.0566244	0.0645717	-1.74791
-98	0.854333	0.496705	0.309447	0.221531	0.357628	0.478824	-0.555813	-0.263254	-0.0442068	-1.20004	0.936786	0.235935	-0.267228	0.0998378	0.154972	0.0660618	0.174344	0.512103	-0.209113	0.258783	-0.150998	0.0144045	0.204643	0.423193	0.271698	0.680486	0.702838	0.970066	-0.280142	0.248849	-0.33776	-0.0864267	-2.30372
-96	0.465413	0.126163	-0.301003	-0.0844399	-0.234445	-0.103811	-1.09325	-0.848373	-0.51409	-1.65204	1.1757	0.284612	0.625352	-0.326335	-0.675519	-0.577668	-0.245869	0.270208	-0.694891	-0.00447035	-0.533462	-0.5126	-0.274678	-0.178814	-0.216564	0.42965	0.00596046	0.535448	-0.628829	0.554323	-0.283122	0.102321	-2.08169
-94	0.751515	0.0586112	-0.181794	-0.0452002	-0.359118	-0.475347	-1.26412	-1.05848	-0.982483	-1.9595	1.5224	0.0124176	1.86761	-0.55482	-0.993907	-0.90152	-0.314415	0.238915	-0.912944	-0.0526508	-0.751515	-0.746548	-0.571211	-0.217557	-0.445545	0.394881	-0.376999	0.472367	-0.995894	1.29243	-0.153979	-0.0322859	-2.09063
-92	1.46727	0.753999	0.16888	0.359118	-0.193218	-0.411769	-1.18911	-0.925859	-1.61628	-2.02258	1.76777	0.0665585	2.34296	-0.399848	-0.902017	-0.867744	-0.247856	0.357628	-0.869731	0.08593	-0.81112	-0.737111	-0.618895	0.00745058	-0.155469	0.454485	-0.316401	1.03762	-1.36693	0.94374	-0.000993411	-0.587602	-2.78056
-90	1.4623	1.1613	0.402828	0.419219	-0.262757	-0.497699	-1.30286	-1.02669	-2.31862	-2.06729	1.31081	0.455976	1.80999	-0.250836	-0.893076	-0.967085	-0.418226	0.388424	-0.882149	0.038743	-0.929832	-0.823041	-0.738601	-0.0908971	-0.055631	0.265241	-0.224014	1.34856	-1.7191	-0.016888	0.275671	-0.742575	-2.68171
-88	1.10418	0.841419	0.610451	0.234445	-0.319878	-0.580649	-1.24226	-1.11212	-2.3211	-1.94311	0.55631	0.658135	1.32372	-0.187258	-0.590583	-1.11808	-0.5578	0.402331	-0.878175	0.0094374	-0.94672	-0.721713	-0.739594	-0.157952	-0.116229	0.318885	-0.190735	1.37389	-1.60784	-0.0119209	0.441074	-0.555317	-1.86314
-86	1.25865	0.471373	0.72966	0.160436	-0.169873	-0.452995	-0.925859	-0.926356	-1.87159	-1.62721	0.511607	0.591079	1.58201	0.0278155	-0.132124	-1.00285	-0.46591	0.369549	-0.713269	0.038743	-0.881155	-0.454485	-0.64075	-0.00198682	-0.154475	0.452995	-0.212093	1.33812	-1.31279	0.934799	0.521541	-0.562767	-1.62075
-84	1.64459	0.395377	0.527501	0.106295	-0.069042	-0.405808	-0.885129	-0.888109	-1.92076	-1.54823	0.920395	0.367065	2.18749	0.16888	-0.473857	-0.990927	-0.406802	0.323355	-0.676016	0.077486	-0.909468	-0.434617	-0.711282	0.195205	-0.188251	0.153482	-0.314911	1.12156	-1.45038	1.32918	0.526011	-0.591079	-1.74145
-82	1.92672	0.51111	0.151495	0.000496705	0.000993411	-0.421206	-1.13149	-1.05451	-2.3216	-1.81546	1.15832	0.153979	2.26299	0.0660618	-1.30186	-1.23133	-0.423193	0.433127	-0.895063	0.240405	-1.02172	-0.534455	-0.787775	0.438094	-0.169873	-0.213087	-0.42965	0.937283	-1.86215	0.734131	0.437597	-0.478327	-1.72506
-80	1.81248	0.482301	0.177821	-0.17633	0.0874201	-0.537435	-1.36197	-1.34706	-2.57095	-2.14577	1.0699	-0.103315	1.19805	-0.4222	-1.61131	-1.5825	-0.467896	0.473857	-1.19855	0.230968	-1.25567	-0.589093	-0.955164	0.778337	-0.243882	-0.731647	-0.72221	0.789762	-2.21034	0.0740091	0.100831	-0.422696	-1.60734
-78	1.28249	0.181794	0.666082	-0.193218	0.313918	-0.755489	-1.21792	-1.56114	-2.37425	-2.1264	0.934799	-0.374019	-0.174344	-0.978013	-1.25021	-1.75188	-0.534455	0.38445	-1.29988	0.116229	-1.36395	-0.485778	-1.09971	1.10964	-0.367562	-1.21693	-0.919898	0.561774	-2.10851	-0.0913938	-0.259777	-0.407298	-1.32571
-76	1.26163	0.298023	0.98298	0.137091	0.68297	-0.678003	-0.563264	-1.28845	-1.55369	-1.49012	1.21991	-0.182788	-0.422696	-0.976026	-0.522037	-1.4171	-0.347694	0.480314	-0.909468	0.242889	-1.09325	-0.072519	-0.961125	1.16974	-0.267228	-0.766416	-0.658135	0.603497	-1.35899	0.409285	-0.12666	-0.415246	-1.42604
-74	1.70668	0.890096	1.03513	0.414749	0.861287	-0.386933	0.0293056	-0.840922	-0.680486	-0.739098	1.64857	0.373522	-0.0754992	-0.68297	-0.00645717	-1.08679	-0.0377496	0.708799	-0.416239	0.469883	-0.760456	0.378489	-0.68893	1.05798	-0.0764926	0.115236	-0.42518	0.884136	-0.563264	1.11312	0.325342	-0.308951	-1.86811
-72	1.52687	1.10765	1.28746	0.201662	0.599523	-0.419219	0.100831	-0.81261	-0.347197	-0.524024	1.5383	0.536938	-0.55035	-0.583629	-0.0968575	-1.34458	-0.110765	0.727177	-0.420213	0.395377	-0.783801	0.432134	-0.68446	0.881155	-0.183781	0.283122	-0.646214	0.93629	-0.299017	1.01129	0.360608	0.00447035	-1.83533
-70	1.03414	1.0709	1.66744	-0.0730157	0.319382	-0.641247	-0.0278155	-0.972549	-0.369549	-0.702838	1.00285	0.386437	-1.18663	-0.599027	-0.328322	-1.67837	-0.334779	0.64522	-0.595053	0.124673	-0.98298	0.276168	-0.850856	0.698368	-0.463426	-0.0586112	-1.02172	0.959138	-0.412762	0.369052	-0.0754992	-0.0849366	-1.87159
-68	1.00235	1.35253	1.92424	0.119209	0.586609	-0.626842	0.224014	-0.801186	-0.263254	-0.770887	0.852843	0.518064	-0.321865	-0.283619	-0.0844399	-1.46776	-0.181297	0.821054	-0.38892	0.238915	-0.803669	0.485281	-0.666082	0.969072	-0.385443	0.0541409	-1.03712	1.17421	-0.50962	-0.0248353	-0.114242	-0.649194	-2.48651
-66	0.844896	1.49359	1.63416	0.380476	0.89407	-0.530481	0.655651	-0.580649	-0.0958641	-0.721713	1.14689	0.608464	1.31428	0.0327826	0.407795	-1.20799	-0.0382463	0.933806	-0.17335	0.421703	-0.499189	0.764926	-0.406802	1.19011	-0.229975	0.586609	-0.906487	1.16477	-0.540415	-0.273188	0.0531475	-0.913938	-2.69463
-64	-0.103811	0.777841	0.409285	0.0198682	0.537435	-0.822544	0.542402	-0.946224	-0.449022	-1.16974	1.14491	0.210106	1.27703	-0.490248	0.421206	-1.67787	-0.472864	0.440081	-0.559787	-0.0412265	-0.765423	0.46591	-0.76741	0.700851	-0.609458	0.766416	-1.24772	0.619888	-0.950197	-0.199179	-0.330806	-0.577172	-1.83433
-62	-1.05004	-0.253816	-0.77337	-0.680486	-0.0228484	-1.34061	0.110765	-1.48416	-1.22736	-1.81695	0.723203	-0.557303	-0.472864	-1.35948	0.0889103	-2.35736	-0.999371	-0.248353	-1.08182	-0.630319	-1.24325	-0.033776	-1.35601	0.17186	-1.16626	0.552336	-1.77125	-0.103811	-1.59691	0.413756	-1.01676	-0.136594	-0.702341
-60	-0.531971	-0.262757	-0.537932	-0.545382	0.171363	-1.06941	0.25034	-1.22786	-1.34806	-1.58499	0.460943	-0.643233	-1.51893	-1.31776	0.0993411	-2.20786	-0.763436	-0.118713	-0.848373	-0.445545	-1.04656	0.137587	-1.20054	0.416239	-0.958145	0.561774	-1.62323	-0.0605981	-1.51445	0.698368	-1.01924	-0.183284	-0.651677
-58	0.733137	0.527004	0.475844	0.29703	0.829498	-0.215073	0.72668	-0.528495	-0.666082	-0.852843	0.316898	0.364582	-1.12057	-0.574688	0.189741	-1.66049	-0.126163	0.582139	-0.12219	0.182291	-0.312924	0.671049	-0.47336	0.944237	-0.100334	0.788271	-1.01924	0.63926	-0.836452	0.572701	-0.236432	-0.370542	-1.46478
-56	0.946224	0.768403	0.683467	0.331799	0.790258	-0.0362595	0.584126	-0.407298	-0.422696	-0.803173	-0.235438	0.793238	-0.526011	-0.172853	-0.30448	-1.7186	-0.0278155	0.602007	-0.00844399	0.324349	-0.0322859	0.546376	-0.224014	0.793735	0.233452	0.611941	-0.928839	0.790755	-0.658631	0.867744	0.0551343	-0.108282	-1.72406
-54	0.142554	0.207126	0.0730157	-0.59406	0.0864267	-0.715256	-0.126163	-0.801682	-1.23034	-1.28945	-1.20103	-0.016888	-0.262757	-0.329812	-1.12404	-2.10156	-0.530481	-0.142058	-0.606974	-0.181794	-0.472864	-0.147025	-0.678996	0.172853	-0.398854	0.0879169	-1.35501	0.150005	-1.2666	0.887613	-0.325342	0.205139	-1.16974
-52	-0.488261	-0.340243	-0.493725	-1.31329	-0.431637	-1.35402	-0.635783	-1.04755	-2.19246	-1.49757	-1.53035	-0.680486	0.0352661	-0.524521	-1.45088	-1.97589	-0.98596	-0.771383	-1.12851	-0.823041	-0.996888	-0.635286	-1.16477	-0.206629	-1.09126	-0.176827	-1.43449	-0.39041	-1.90934	0.51558	-0.532468	0.160933	-0.653664
-50	-0.376006	-0.386437	-0.415246	-1.20997	-0.600517	-1.40816	-0.733137	-0.983477	-2.38667	-1.36892	-0.758966	-0.488261	0.286102	-0.462929	-1.2209	-1.48962	-1.02669	-0.94374	-1.14689	-1.10765	-1.09623	-0.770887	-1.2661	-0.521044	-1.1608	-0.148018	-0.925362	-0.42667	-2.01265	0.550846	-0.452995	-0.13411	-0.526508
-48	-0.117222	-0.496209	0.16888	-0.822544	-0.646214	-1.20898	-0.755489	-0.865758	-1.885	-1.09176	-0.167886	-0.280142	-0.0173847	-0.346204	-0.929832	-1.1613	-0.907977	-0.953178	-0.905494	-1.0699	-0.938773	-0.759463	-1.13895	-0.781318	-1.02868	-0.270208	-0.469883	-0.523527	-1.5522	0.0268221	-0.477334	-0.195702	-0.479817
-46	0.0173847	-0.754992	0.345707	-0.687937	-0.646214	-1.06841	-0.666082	-0.685453	-0.923375	-0.509123	-0.327826	-0.484784	-0.263254	-0.275175	-0.636776	-0.885626	-0.81559	-0.9045	-0.665585	-0.94076	-0.750025	-0.740091	-0.923872	-0.622372	-1.06941	-0.522534	-0.403325	-0.748038	-0.736117	-0.644227	-0.72668	0.12517	-0.437101
-44	0.0988444	-0.624359	-0.21259	-0.641743	-0.643233	-0.926852	-0.324349	-0.359118	0.191232	0.17633	-0.274181	-0.549853	0.447532	-0.0754992	-0.182291	-0.602007	-0.55482	-0.702838	-0.446538	-0.715256	-0.467896	-0.622372	-0.660618	-0.472367	-0.997881	-0.42518	-0.444551	-0.653664	0.0546376	-0.618895	-0.662605	0.25034	-0.486275
-42	-0.121196	-0.270208	-0.626842	-0.407298	-0.530481	-0.711779	0.0879169	-0.107785	1.0858	0.641247	0.186265	-0.413756	1.22686	-0.0233452	0.29703	-0.386933	-0.174344	-0.371536	-0.155965	-0.424683	-0.130137	-0.322362	-0.491242	-0.51558	-0.630319	0.0650684	-0.320375	-0.290573	0.582139	-0.971059	-0.392397	0.132124	-0.524024
-40	-0.348687	0.021855	-0.275671	-0.0968575	-0.345707	-0.519554	0.186265	-0.150005	1.41064	0.716746	0.563264	-0.235438	0.868738	-0.507633	0.581642	-0.306964	-0.0596046	-0.08593	0.0317891	-0.21557	-0.0188748	-0.139077	-0.489255	-0.403325	-0.277658	0.449518	-0.123183	-0.00248353	0.739098	-1.09971	-0.355144	0.0660618	-0.6785
-38	-0.352661	0.235438	0.331799	0.0953674	-0.408292	-0.38445	-0.00447035	-0.266234	1.01427	0.501176	0.863274	0.0531475	0.132124	-1.01527	0.595053	-0.34223	-0.201166	0.033776	-0.0615915	-0.121693	-0.161429	-0.248849	-0.460943	-0.386437	-0.0531475	0.402331	-0.156959	0.0601013	0.445545	-0.169377	-0.306964	-0.210603	-1.05153
-36	-0.286102	0.26077	0.567734	0.221034	-0.561277	-0.178317	-0.0114242	-0.126163	0.610948	0.56227	0.893076	0.101825	-0.112752	-0.905991	0.55929	-0.12666	-0.213583	0.0367562	-0.118713	-0.138084	-0.251333	-0.362595	-0.265737	-0.732144	0.123183	0.104308	-0.324845	0.0153979	0.306467	0.599523	-0.2563	-0.72221	-1.17918
-34	-0.150502	-0.0119209	0.280639	0.243882	-0.656645	-0.0913938	0.191232	0.0705322	0.762443	0.85781	0.375013	-0.347694	-0.0486771	-0.418226	0.659128	0.288089	-0.239412	-0.203649	0.030299	-0.308951	-0.179807	-0.313421	-0.0963608	-1.02023	0.0918905	-0.0521541	-0.186761	0.00198682	0.625352	0.462433	-0.327826	-1.04308	-0.68893
-32	0.00695388	-0.245372	-0.255307	0.117222	-0.626842	-0.0635783	0.43114	0.249346	1.38928	1.18216	-0.399351	-0.715752	0.439088	0.0173847	0.950694	0.707308	-0.301003	-0.469387	0.29554	-0.465413	0.0447035	-0.0849366	0.0372529	-0.786285	0.0630816	0.0824531	0.247359	0.00248353	1.15583	0.130634	-0.469387	-0.833968	0.292063
-30	-0.121196	-0.292559	-0.793238	-0.13113	-0.437101	0.0958641	0.581642	0.449022	1.86016	1.50601	-0.98	-0.601013	0.72221	0.161926	1.08778	1.04954	-0.30299	-0.599523	0.563264	-0.598033	0.21259	0.122686	0.182788	-0.356138	0.12666	-0.0829498	0.407795	-0.200172	1.56413	-0.148515	-0.635286	-0.220537	1.4171
-28	-0.572701	-0.564257	-1.48763	-0.672539	-0.596046	-0.153482	0.184774	0.25183	1.15087	1.27951	-1.58747	-0.50962	0.0874201	-0.103315	0.537932	1.00285	-0.624855	-0.992914	0.345707	-0.977516	-0.0442068	-0.161926	0.016888	-0.557303	-0.316401	-0.77039	0.137091	-0.807643	1.20501	-0.665088	-0.686447	0.269711	2.13335
-26	-0.852843	-0.935793	-2.29975	-1.11163	-1.0401	-0.612438	-0.345707	-0.0839432	0.04222	0.663102	-2.02954	-0.535945	-0.34223	-0.364582	-0.0933806	0.872711	-1.03464	-1.44194	-0.153482	-1.39425	-0.472864	-0.676016	-0.310938	-1.26163	-0.994404	-1.10865	-0.000496705	-1.36197	0.448028	-0.740588	-0.51856	0.412762	2.08219
-24	-1.09176	-0.895063	-2.7741	-1.0098	-1.16577	-0.588099	-0.331799	0.0243386	-0.00894067	0.615915	-1.60635	-0.373026	0.04222	-0.291069	-0.206133	1.13448	-0.961125	-1.36991	-0.157456	-1.34309	-0.415246	-0.753502	-0.235935	-1.59939	-0.957648	-0.68744	0.286102	-1.3113	0.38892	-0.17484	-0.309447	0.395874	1.62025
-22	-1.50005	-0.649194	-2.42889	-0.603497	-0.847379	-0.137091	0.055631	0.452002	0.636776	1.05351	-0.6785	-0.4222	0.138084	-0.125666	-0.0094374	1.46131	-0.402331	-0.884632	0.305474	-0.816087	0.164409	-0.400345	0.248849	-1.17123	-0.405312	-0.114739	0.601013	-0.939767	0.919402	-0.118713	-0.224014	0.346204	1.39475
-20	-1.77821	-0.625352	-1.3575	-0.221531	-0.288089	0.495712	0.565251	0.978013	1.18514	1.49012	0.0163913	-0.742575	-0.408789	-0.00695388	0.439088	1.65204	0.29554	-0.399351	0.858804	-0.194709	0.824034	0.119706	0.8141	-0.333289	0.0923872	0.363588	0.647207	-0.785788	1.37687	-0.450512	-0.0928839	0.369052	1.68234
-18	-2.18898	-0.878175	-0.454982	-0.207623	-0.0442068	0.831981	0.817577	1.40518	1.58101	1.82043	0.0993411	-0.923872	-1.02371	-0.0243386	0.853837	1.64906	0.620385	-0.33925	1.18415	0.12964	1.08977	0.426173	1.14491	-0.0769893	0.288586	0.591079	0.464916	-0.893076	1.71264	-0.501672	-0.145038	0.368059	2.04543
-16	-2.53071	-1.10616	-0.0928839	-0.439584	-0.251333	0.738104	0.735124	1.56114	1.84029	2.00669	-0.353654	-0.912448	-1.1603	0.000496705	0.86079	1.51843	0.602007	-0.517567	1.23282	0.168383	1.07338	0.386437	1.21643	-0.640253	0.180304	0.453492	0.335276	-0.902514	1.94609	-0.704825	-0.47038	0.353158	2.35885
-14	-2.07375	-1.08927	0.227491	-0.282625	-0.283619	0.879665	0.7689	1.67688	1.70817	1.96596	-0.730157	-0.433127	-0.713269	0.293056	0.670056	1.49657	0.707805	-0.311931	1.28994	0.326335	1.29839	0.451008	1.41015	-0.8593	0.374019	0.287592	0.463923	-0.855823	1.82589	-0.991921	-0.251333	0.621378	3.07262
-12	-0.960628	-0.867744	0.544389	0.264744	0.0948707	1.35352	0.942747	1.81446	1.3863	1.76181	-0.845393	0.275175	-0.338256	0.579655	0.634789	1.58896	1.02023	0.109275	1.42306	0.590583	1.64459	0.673532	1.73152	-0.30448	0.961622	0.154475	0.673036	-0.98596	1.49856	-0.730654	0.446538	0.965099	3.98805
-10	0.0561277	-0.622869	0.472367	0.712772	0.68893	1.72704	1.09325	1.93467	1.32173	1.67439	-1.02719	0.612438	-0.168383	0.76741	0.903507	1.6878	1.3724	0.306964	1.56313	0.778337	1.79658	0.859797	1.93665	0.399351	1.36544	0.0819564	0.926852	-1.02023	1.42703	0.130137	0.903507	0.907481	4.51505
-8	0.489751	-0.332296	-0.0526508	0.908971	1.24127	1.91232	1.20948	1.96348	1.55717	1.62969	-1.09524	0.7237	-0.199676	1.09126	1.18713	1.61032	1.63267	0.421206	1.61876	1.02023	1.80801	1.06245	2.00222	0.846883	1.55568	0.283619	1.12901	-0.670552	1.53482	0.802179	1.08033	0.590086	4.43409
-6	0.490745	0.0531475	-0.423193	1.11659	1.31379	2.035	1.19458	1.82241	1.69029	1.26461	-0.574688	0.664592	-0.563761	1.43349	0.962118	1.25915	1.81148	0.695884	1.47174	1.40121	1.8691	1.16924	1.97043	0.834465	1.85867	0.421703	1.04308	-0.109275	1.3873	0.701845	0.908474	0.440578	4.14401
-4	0.51856	0.590086	-0.0769893	1.59939	1.21444	2.20189	1.02768	1.58797	1.34408	0.6482	0.100334	0.827014	-0.403325	1.33018	0.456969	0.950694	2.07275	1.18315	1.30783	1.89543	2.07722	1.18911	1.82589	0.85036	2.28931	0.196199	0.94374	0.412762	0.965595	-0.0769893	0.881155	0.413259	4.06156
-2	1.03166	1.58648	0.72966	2.45472	1.47372	2.40455	0.884136	1.35054	0.514587	0.112255	0.493228	2.01364	0.475347	1.09971	0.20961	0.789762	2.53866	2.02407	1.3123	2.50836	2.35389	1.24673	1.70072	1.39624	2.6534	0.106295	1.06494	1.10815	0.42667	-0.507633	1.76926	0.280142	3.82612
0	1.6287	2.45074	1.09375	3.05772	1.3714	2.38766	0.392397	0.876188	-1.15683	-0.669062	0.756979	2.99464	0.873208	0.880162	-0.249346	0.22004	2.7289	2.62062	1.01874	2.85953	2.20984	0.900527	1.45634	1.57853	2.71946	0.157456	0.932316	1.74046	-0.7689	-0.407298	2.20438	0.111262	3.34531
2	1.48366	2.35438	0.671049	2.80887	0.623862	1.91132	-0.663102	-0.0327826	-3.31899	-2.02159	0.643233	2.30918	0.451505	0.323355	-1.2815	-0.929336	2.26299	2.32408	0.130137	2.56598	1.52588	0.0347694	0.801186	1.13	2.43634	-0.177821	0.271201	1.59492	-2.46863	-0.556807	1.26908	0.127157	3.11931
4	1.22438	2.14626	0.666082	2.56002	0.325839	1.44988	-1.29193	-0.699361	-4.43856	-3.15557	0.63628	1.49608	0.321368	0.115732	-2.04841	-1.66496	1.88748	2.0052	-0.519057	2.28782	1.09524	-0.406305	0.285109	1.09623	2.26249	-0.592073	-0.149012	1.34806	-3.44366	-0.236928	0.826021	0.288089	3.09646
6	1.51545	2.43336	1.76132	2.86301	0.770887	1.51396	-1.0098	-0.579655	-4.03722	-3.28074	1.42505	1.73002	1.03911	0.751019	-2.04444	-1.52439	2.09759	2.36134	-0.348687	2.61366	1.31379	-0.0571211	0.442564	1.52191	2.43286	-0.692904	0.0740091	1.74393	-3.2867	0.678996	1.64012	0.204146	3.19233
8	1.65949	2.57939	2.84115	3.03239	1.21593	1.78417	-0.486275	-0.144541	-3.06865	-2.74579	1.96795	1.85023	1.87953	1.58399	-1.60436	-1.12255	2.43137	2.82526	0.125666	3.08653	1.69973	0.408292	0.792245	1.84725	2.59628	-0.572205	0.405808	2.08368	-2.63502	1.02818	2.1855	-0.0720223	3.78291
10	0.999371	1.93318	2.78105	2.58436	1.09673	1.56065	-0.452002	-0.185768	-2.68271	-2.51333	1.11957	1.05798	1.70519	1.68383	-1.44243	-1.15782	2.25703	2.6683	0.0521541	3.00705	1.66943	0.419716	0.685453	1.80602	2.30173	-0.622372	0.424186	1.54326	-2.36283	0.770887	1.51694	0.0442068	5.02765
12	0.04222	0.947217	2.30074	1.99229	0.800192	1.05997	-0.608464	-0.435611	-2.76864	-2.47161	-0.0427167	0.319878	0.445048	1.16626	-1.57952	-1.36693	1.83781	2.11746	-0.329812	2.57343	1.39872	0.299513	0.392397	1.61777	1.7643	-0.902514	0.475844	0.614425	-2.27441	0.860294	0.605484	0.519057	6.29524
14	-0.136594	0.829498	2.66979	2.13981	1.18812	1.25617	-0.0824531	0.107785	-2.19941	-1.59591	0.116726	0.634293	-0.289579	1.27604	-1.01378	-0.897547	2.06729	2.11249	0.0486772	2.57293	1.63466	0.730157	0.700851	1.78168	1.71612	-0.631313	1.05103	0.457962	-1.48813	1.70469	0.72817	0.714759	6.88235
16	0.401835	1.30137	3.01898	2.54263	1.82092	1.83036	0.632306	0.937283	-1.40319	-0.438094	1.10567	1.12057	-0.130634	1.68929	-0.104805	-0.271698	2.55058	2.4423	0.675519	2.84563	2.07971	1.27157	1.28796	2.10702	2.02904	0.116229	1.48167	0.883142	-0.598033	2.28186	1.27554	0.549356	7.00057
18	0.893573	1.45088	2.38915	2.53369	1.92473	2.036	0.866254	1.22488	-1.16328	0.0412265	1.73797	1.05401	0.17484	1.28994	0.297527	-0.206629	2.64049	2.50737	0.767907	3.00656	2.20438	1.38829	1.5681	2.13236	2.24064	0.572701	1.16924	1.09375	-0.339746	1.96596	1.32819	0.378489	7.05371
20	0.930826	1.39773	1.64111	2.412	1.75536	2.04841	1.03911	1.29094	-0.874201	0.179311	1.92076	0.930826	0.566741	0.650187	0.582139	-0.208616	2.67923	2.52972	0.787775	3.15259	2.30223	1.47969	1.68433	1.98781	2.27491	0.850856	0.650187	1.08977	-0.227988	1.30733	1.1916	0.324845	7.03136
22	0.542899	1.41462	1.46826	2.37525	1.62423	2.0201	1.20401	1.50452	-0.664592	0.286102	2.01712	1.03811	0.703335	0.522534	0.761946	0.000496705	2.71151	2.64645	0.949701	3.22064	2.38021	1.5974	1.7787	1.83731	2.1706	1.10964	0.570714	1.04656	-0.145535	0.812113	1.24872	0.232955	6.68267
24	0.536442	1.83086	1.78814	2.67824	1.61578	2.14726	1.41114	1.90586	-0.615915	0.63479	2.33899	1.26958	0.717739	0.613928	0.89556	0.325342	2.72741	2.92013	1.21196	3.25392	2.44677	1.64111	1.95603	1.77622	2.26249	1.27951	0.875195	1.33365	0.0794728	0.64224	1.19259	0.0238419	5.85467
26	1.206	2.44975	2.15967	3.00209	1.57952	2.34197	1.77423	2.21978	-0.0402332	1.13398	2.45919	1.13547	1.36147	0.352164	1.25269	0.43263	2.73287	3.20921	1.44839	3.33687	2.52028	1.74592	2.18153	1.93467	2.52227	1.50551	1.06047	2.01265	0.693897	0.400345	0.710289	-0.120699	5.0957
28	1.71264	2.70357	2.35786	3.17047	1.57555	2.45323	1.97192	2.21233	0.681977	1.31925	1.72357	1.02073	2.47012	0.102321	1.39574	0.140071	2.62757	3.27975	1.43945	3.43025	2.48154	1.89344	2.31266	2.31862	2.82725	1.77672	1.02023	2.4577	1.15683	-0.0864267	0.621875	-0.0601013	5.35051
30	1.2209	2.47558	2.32408	3.28273	1.65006	2.35885	1.89791	2.14229	0.935793	1.33812	0.605484	1.30882	3.26186	0.571211	1.31875	-0.0993411	2.48551	3.13918	1.32273	3.40144	2.32408	1.87804	2.2014	2.40306	2.87841	1.78963	0.761449	2.04444	1.22637	0.224014	1.26014	0.103315	6.61214
32	0.126163	1.98185	1.6287	2.98967	1.36097	1.89692	1.60287	1.93417	0.675023	1.28547	0.354151	1.18812	3.26584	1.06096	1.22587	-0.142058	2.17458	2.6688	1.05252	3.03586	1.99974	1.51942	1.83632	1.64708	2.38766	1.43101	0.303487	1.18315	0.914931	1.54823	1.38134	0.077486	7.27226
34	-0.33776	1.67042	0.960131	2.64794	0.994404	1.69973	1.48366	1.72307	0.429153	1.25418	0.741084	0.827014	2.82576	1.07984	1.29491	-0.00149012	1.98931	2.29975	0.770887	2.73089	1.75138	1.29193	1.73102	0.965595	2.09063	1.19011	0.250836	0.948211	0.608961	1.94609	0.954171	-0.0645717	7.05024
36	0.183284	1.55071	1.48465	2.75175	1.07735	2.0648	1.63565	1.8085	0.480314	1.56313	0.85334	0.746051	2.23964	0.880162	1.49061	0.328322	2.22176	2.46763	0.785788	2.89182	1.83831	1.47472	1.98235	1.23481	2.36928	1.31329	0.671049	1.17819	0.732144	0.829995	0.609954	-0.150005	7.23402
38	0.825524	1.44293	2.4274	3.02444	1.25865	2.41896	1.68582	2.02705	0.497699	2.05984	0.881652	0.861784	1.50303	0.863274	1.46876	0.77039	2.46465	2.77857	0.877182	3.12924	1.9605	1.62969	2.19742	1.75933	2.72642	1.39823	1.15087	1.13448	1.01527	-0.252326	0.483791	-0.21557	7.94331
40	0.814597	1.45982	2.40952	3.10044	1.12901	2.36332	1.54475	2.06083	0.813107	2.41697	0.890593	1.02768	0.922879	1.28398	1.35551	1.02719	2.44429	2.76069	0.777841	3.03537	1.79261	1.49409	2.08964	1.7345	2.71002	1.17073	1.29739	1.04258	1.34259	-0.417729	0.800689	-0.275175	8.37098
42	0.25183	1.38233	1.30335	2.74231	0.72519	1.79311	1.32173	1.7484	1.41561	2.51979	0.724693	0.802676	0.774364	1.38928	1.3714	0.816584	2.0961	2.36432	0.458459	2.64694	1.41611	1.16726	1.61678	1.21295	2.13335	0.94374	0.885129	1.18911	1.66396	0.226001	0.90152	-0.136097	8.32826
44	-0.194212	1.10169	0.0481804	2.20339	0.265737	1.22537	1.08331	1.35452	1.48018	2.36134	0.421703	0.0109275	0.627339	0.795722	1.24375	0.456472	1.56065	1.93566	0.147025	2.22276	1.1012	0.857313	1.15732	0.710785	1.5075	0.706315	0.398854	1.06394	1.6431	0.59704	0.280142	0.268221	8.31733
46	0.0501672	1.10815	-0.188748	2.13385	0.0153979	1.16775	0.899037	1.22935	0.953674	2.17259	0.546376	-0.580649	0.328819	0.0675519	0.918408	0.389914	1.30683	1.86314	0.140071	2.12093	1.06593	0.686944	1.09722	0.637273	1.46627	0.323355	0.361105	0.701348	1.33663	0.431637	-0.400345	0.525514	8.36154
48	0.515083	1.43299	0.329316	2.48651	0.120203	1.39475	0.935296	1.40617	0.689427	2.28186	1.19905	-0.358621	0.619888	-0.282129	0.89854	0.548859	1.48465	2.08368	0.482301	2.34346	1.25915	0.701348	1.26859	0.72668	1.76529	0.141064	0.571708	0.646214	1.23133	0.668565	-0.402331	0.329812	8.10375
50	0.414252	1.41809	0.38445	2.65092	0.303487	1.39326	1.13696	1.54873	0.810623	2.56995	1.16775	0.202656	0.966092	-0.149508	1.02421	0.520547	1.63664	2.13385	0.786781	2.45621	1.34259	0.788768	1.24574	0.751515	1.78615	0.171363	0.506639	0.723203	1.29243	1.18166	0.104308	0.077486	7.85738
52	-0.0158946	1.12007	0.0501672	2.37872	0.489255	1.19905	1.36395	1.6282	1.02371	2.93702	0.262757	0.321368	0.212093	0.0501672	0.94523	0.403821	1.60237	2.02258	0.932316	2.43435	1.42554	0.942747	1.12106	1.00732	1.55618	0.13411	0.220537	0.568231	1.51197	1.12355	0.224511	0.163416	8.0804
54	-0.0610948	0.968079	0.168383	1.94013	0.941753	1.14838	1.78864	1.95156	1.45932	3.53009	-0.364085	-0.299017	-1.04954	0.131627	1.11759	0.708302	1.72059	2.06033	1.28398	2.45869	1.81645	1.35303	1.25716	1.50204	1.35203	-0.00695388	0.247856	0.34521	2.00868	0.401835	-0.285109	0.487268	8.58506
56	0.0610948	0.783304	0.540912	1.62472	1.51247	1.26014	2.40405	2.45869	2.02904	4.24236	-0.325839	-1.01328	-1.59293	0.230471	1.7792	1.41213	1.99477	2.09858	1.8244	2.50141	2.27938	1.90834	1.60933	1.72208	1.19756	-0.118713	0.603994	0.248849	2.55605	0.12964	-0.598033	0.613431	9.07232
58	-0.338753	0.344714	0.525514	1.60088	1.7787	1.53333	2.91814	2.96483	2.46018	4.89503	-0.326832	-1.13547	-1.11908	0.298023	2.32408	2.11596	2.18997	1.97887	2.29875	2.50787	2.60969	2.30422	1.96447	1.52737	1.23233	-0.0402331	0.933806	-0.00844399	2.94844	0.584622	-0.401338	0.472367	9.68923
60	-1.25915	-0.411769	0.166893	1.59343	1.73897	1.79609	3.04232	3.23057	2.51085	5.31574	-0.457962	-1.17073	-0.384947	0.234942	2.25008	2.52376	2.13434	1.6729	2.51333	2.34395	2.77708	2.43833	2.19345	1.47422	1.39475	0.0710289	1.20054	-0.488758	3.11434	0.592073	-0.223021	0.538925	10.8848
62	-1.8239	-0.812113	0.0576178	1.48962	1.67489	1.8542	2.9251	3.27528	2.27441	5.40515	-0.268221	-1.26511	-0.121693	0.176827	2.05338	2.60125	1.91977	1.24872	2.50836	2.02358	2.80042	2.3976	2.32855	1.70022	1.52489	0.43114	1.51942	-0.675023	3.091	0.0819564	-0.2563	0.846883	11.9209
64	-1.31528	-0.0670552	0.795722	1.8244	1.66148	2.07921	3.0001	3.50028	2.11795	5.42204	0.453989	-0.776351	-0.312924	0.453492	2.34147	2.69314	2.03898	1.33912	2.72393	1.97689	2.92063	2.38518	2.58485	1.60684	1.81844	1.16279	1.88202	-0.238915	2.87145	0.021855	-0.139077	0.971556	11.9701
66	-0.228484	1.17868	1.93268	2.50886	1.69675	2.56797	3.41187	3.99947	2.37674	5.61873	1.29392	0.0998378	-0.267228	1.09474	2.8789	2.96682	2.5481	1.99874	3.2415	2.42541	3.28024	2.61515	3.03884	1.39078	2.41548	1.78615	2.30322	0.619888	2.9395	0.207623	0.401338	0.782311	11.5861
68	0.420709	1.73201	2.12143	2.86549	1.67539	2.85705	3.76751	4.39485	3.1357	5.88298	1.5522	0.539422	0.524521	1.54326	3.18736	3.19183	2.8491	2.43783	3.63638	2.86748	3.65376	2.82178	3.41386	1.4469	2.90175	1.94311	2.67526	1.17123	3.47743	0.422696	0.890593	0.579158	11.4659
70	0.499189	1.51445	1.44194	2.93205	1.59691	2.95391	3.9344	4.62433	3.93838	6.03894	1.27157	0.533462	1.7042	1.66049	3.30756	3.30061	2.87195	2.58734	3.87877	3.08255	3.8892	2.83519	3.57529	1.5974	3.13719	1.82837	2.79893	1.12653	3.92546	0.977019	1.03712	0.638763	11.5643
72	0.905494	1.63118	1.22388	3.30508	1.85519	3.25441	4.36008	5.02914	4.51306	6.24458	0.941257	0.882645	3.05722	1.69327	3.75311	3.50575	3.15656	2.96732	4.27316	3.45558	4.22547	3.11732	3.88175	1.87208	3.47495	2.07623	2.77857	1.27604	4.25776	1.5224	1.24921	0.563761	11.1923
74	1.77324	2.47608	1.86116	4.07596	2.46912	3.7382	5.02467	5.51939	5.07236	6.45767	1.03613	1.57158	4.33872	1.57257	4.51058	3.82364	3.73671	3.50873	4.81357	3.94881	4.68343	3.69102	4.35064	2.23219	3.94285	2.52823	2.66681	1.91877	4.6442	1.82837	1.60486	0.123183	10.5679
76	1.8696	2.77509	2.57542	4.50164	2.84314	3.95278	5.21739	5.58843	5.32568	6.31909	1.46379	1.54475	4.37597	1.45386	4.79023	3.80923	3.92795	3.66569	4.99934	4.146	4.84337	3.94583	4.50015	2.54711	4.15991	2.488	2.47806	2.15173	4.77781	1.8691	1.46826	-0.111262	10.928
78	0.879665	1.92871	2.71599	4.20809	2.73536	3.74566	4.73807	5.3068	4.75446	5.97189	1.70867	0.791252	2.93752	1.51545	4.1917	3.5584	3.65128	3.36866	4.66357	3.9955	4.6134	3.67115	4.3268	2.77211	3.93738	1.93367	2.44031	1.58896	4.36455	1.09076	0.834962	0.139077	12.136
80	0.127157	1.29789	2.41001	3.91801	2.50041	3.60906	4.20461	5.21491	3.55194	5.7136	1.75734	0.663598	1.90983	1.84427	3.31153	3.53207	3.48538	3.18587	4.38491	3.76105	4.4028	3.30359	4.23143	2.69512	3.67959	1.36097	2.64396	0.942747	3.51171	-0.173847	0.849863	0.512103	12.969
82	0.38892	1.6888	2.35041	4.08192	2.62707	3.83953	4.28955	5.6232	3.13173	5.73496	2.13385	1.18216	2.13583	2.13981	3.18786	3.80824	3.76354	3.36468	4.68145	3.85543	4.65214	3.44117	4.51952	2.54611	3.82562	1.43846	2.97328	0.993411	3.242	-0.139077	1.39276	0.608961	12.968
84	0.727177	2.0504	2.6385	4.14451	2.91069	4.06106	4.66903	6.02255	3.7243	5.87453	2.79297	1.13696	2.13981	2.01662	3.55542	3.95775	4.13756	3.5584	5.13146	4.13209	5.08229	3.83357	4.85579	2.40654	3.97116	1.76926	3.13123	1.43498	3.71635	1.15782	1.36644	0.545382	12.8999
86	0.648697	1.91182	2.82129	3.96619	2.85556	4.04964	4.64221	5.95798	3.91503	5.62519	2.98818	0.90152	1.45386	2.01811	3.35425	3.7685	4.23789	3.51965	5.22385	4.16934	5.23726	3.86536	4.83741	2.14825	3.80476	1.67191	3.04729	1.6138	3.89318	2.01166	1.282	0.568231	13.4339
88	0.617902	1.6287	2.9549	3.83109	2.71996	3.97911	4.30892	5.69423	3.23554	5.03709	2.62459	0.902017	0.963112	2.31167	2.71499	3.44614	4.2672	3.38455	5.02566	4.03672	5.25266	3.66867	4.69436	2.111	3.62843	1.43299	2.97974	1.42058	3.43571	1.81049	1.45584	0.663102	14.3781
90	0.883142	1.36395	3.12477	3.73522	2.76367	3.86437	4.0397	5.46724	2.35836	4.44204	2.37872	0.834465	0.766913	2.31067	2.41399	3.05474	4.35909	3.36419	4.79023	4.03325	5.25266	3.56485	4.51207	2.37326	3.46651	1.14342	2.73784	1.11113	2.68817	0.881652	1.45932	0.724196	15.0849
92	1.38034	1.39376	3.18537	3.72678	2.87493	3.75907	3.82115	5.1866	1.54624	3.69946	2.42492	0.977516	0.85036	2.02407	2.40952	2.56201	4.46439	3.43472	4.63476	4.21504	5.18709	3.61403	4.27713	2.86202	3.37114	0.64224	2.25206	1.00931	1.89443	0.549356	1.63714	0.711779	15.3075
94	1.41114	1.2964	2.87642	3.60558	2.75473	3.53605	3.29018	4.54237	0.455479	2.53767	2.08914	0.822047	0.950694	1.87506	2.00371	1.87159	4.27812	3.28571	4.1917	4.17829	4.9144	3.42329	3.87679	3.14613	3.16898	0.150998	1.78168	1.03116	0.884632	1.4772	1.70668	0.848373	15.6224
96	0.951191	1.02172	2.41896	3.35475	2.47359	3.09348	2.7443	3.74715	-0.244876	1.45485	1.60684	0.0938773	0.879665	1.80801	1.53333	1.17123	3.91304	2.97179	3.61005	3.86933	4.52002	3.03686	3.33438	2.81831	2.71151	0.222027	1.41213	1.21693	0.0938773	2.51283	1.09921	0.98596	15.8971
98	0.989437	1.35352	2.55207	3.4829	2.77658	2.91566	2.91069	3.50525	0.0307958	1.08431	1.85619	-0.166396	1.37786	1.55518	1.82738	0.924369	3.99202	3.02444	3.65376	3.83705	4.49022	3.12825	3.11782	2.78701	2.54661	1.05997	1.26263	1.75536	0.0610948	2.82427	0.569721	0.674526	15.4128
100	1.33216	1.88947	2.9092	3.72976	3.3766	3.04083	3.41187	3.60211	0.667572	1.21196	2.00719	0.0630816	2.04394	1.17471	2.58933	0.914435	4.23292	3.24746	3.94682	3.94881	4.72069	3.53853	3.22759	3.42876	2.73784	1.96646	1.11163	2.2014	0.488261	2.50588	0.550846	0.22004	14.626
102	1.17222	1.83086	2.70605	3.48985	3.48687	3.00109	3.51965	3.54052	0.887613	1.35402	1.40021	0.29852	1.56512	0.919402	3.00358	0.658631	4.10577	3.13272	3.83109	3.81122	4.75099	3.70642	3.2569	3.91255	2.82973	2.14676	0.709295	2.0206	0.878672	2.04245	0.748535	0.149012	14.5286
104	0.584622	1.27902	2.12292	2.90374	3.14961	2.76019	3.24696	3.31203	0.354648	1.21246	0.881652	0.462929	0.697871	0.785788	2.90424	0.314911	3.79682	2.7289	3.52859	3.52363	4.49916	3.53307	3.08504	3.86735	2.73387	1.57754	0.306964	1.32223	0.740091	1.44442	0.769893	0.258287	15.0497
106	-0.174344	0.564257	1.30584	2.27789	2.54462	2.48253	2.86748	3.12477	-0.213583	0.966092	0.730654	0.191728	1.16577	0.80665	2.70655	0.25183	3.49383	2.19196	3.21666	3.12577	4.11222	3.14067	2.80142	3.24349	2.47161	0.887613	0.309944	0.363588	0.308951	0.845889	0.366072	0.316401	15.756
108	-0.671049	-0.0596046	0.356634	1.7936	2.04692	2.26349	2.7443	3.14415	0.0233451	1.16726	0.51558	-0.543892	2.57641	1.03265	2.85705	0.628332	3.23604	1.74989	3.03437	2.72393	3.76751	2.85606	2.63453	2.45969	2.16116	0.846386	0.708302	-0.419219	0.387927	0.924369	-0.0481804	0.369549	16.3128
110	-0.484784	-0.392397	-0.206629	1.6277	1.97043	2.16166	2.93801	3.30855	0.868738	1.77672	0.546873	-1.3575	3.28521	1.05004	3.30706	1.12851	2.99414	1.63019	3.09845	2.56747	3.62049	2.86251	2.63701	2.30769	1.94261	1.51197	1.12901	-0.576178	1.04705	1.49359	-0.284612	0.323852	16.4752
112	0.0149012	-0.277658	-0.240902	1.79609	2.05785	2.19246	3.18636	3.58125	1.63068	2.52525	1.12454	-1.62174	2.85109	0.94225	3.67115	1.58101	2.8491	1.69476	3.17295	2.63204	3.66171	3.016	2.78403	2.62707	1.92175	2.06133	1.4618	-0.227491	1.79509	1.65155	-0.312428	0.228484	16.3818
114	0.449022	0.413756	0.244379	2.35438	2.32508	2.61813	3.47942	4.14203	1.93218	3.50873	2.04692	-0.879169	2.07921	1.29839	3.98954	2.2759	3.00358	1.97192	3.392	2.79595	3.81072	3.24448	3.19878	2.90672	2.37127	2.27243	1.96248	0.259777	2.44727	1.35998	0.080963	0.116726	16.0232
116	0.702838	1.03215	0.922382	2.87394	2.71946	3.01898	3.68208	4.55628	2.00768	4.31935	2.60174	0.0288089	1.35303	1.71214	4.39038	2.81334	3.16997	2.2461	3.65078	2.92112	3.89765	3.51568	3.5728	3.00755	2.84066	2.53767	2.40455	0.510116	3.03139	1.48813	0.602504	0.0307957	15.5181
118	0.789762	0.906487	1.20103	2.72493	2.73983	2.67873	3.61204	4.29899	2.30372	4.52449	2.17656	0.038743	0.775854	1.62522	4.76887	2.70953	2.83122	1.99378	3.42677	2.67476	3.6031	3.56833	3.33687	2.71002	2.51681	2.7438	2.25802	0.349184	3.50426	1.60138	0.554323	0.170867	15.4157
120	0.483294	0.221034	1.23282	2.13583	2.29726	1.94907	3.468	3.83457	2.92907	4.58459	1.48714	-0.711779	0.707308	1.47671	5.09719	2.37028	2.20835	1.36296	2.93851	2.12888	2.99613	3.36816	2.70903	1.94162	1.73251	2.69661	1.7792	-0.190735	3.92199	0.740588	-0.0407298	0.494719	16.1653
122	-0.146528	-0.13113	1.39127	1.88549	1.84278	1.59691	3.43025	3.68158	3.67016	4.91391	1.12106	-1.13845	1.46677	1.63168	5.2924	2.2312	1.85519	0.933806	2.64943	1.78913	2.56896	3.16252	2.31415	1.30385	1.36048	2.72989	1.59194	-0.533958	4.43856	-0.363092	-0.267724	0.612438	17.0961
124	-0.576178	0.157952	1.66794	2.10504	1.64807	1.64906	3.40194	3.7084	4.29253	5.38031	0.998378	-0.882149	2.61565	1.77224	5.15779	2.262	1.84029	0.899037	2.56697	1.71413	2.40405	2.95738	2.17607	1.10765	1.50452	2.67973	1.65353	-0.374516	4.96556	-0.583132	-0.0243386	0.418723	17.3633
126	-0.887116	0.253816	1.76132	2.1259	1.42703	1.6431	3.08901	3.47793	4.36306	5.41856	1.00334	-0.63628	2.74628	1.46329	4.52499	2.05537	1.78814	0.830988	2.40058	1.64161	2.23815	2.66085	2.00669	1.03414	1.57108	2.036	1.58499	-0.34074	5.13196	0.0456969	0.0586112	0.356138	17.4448
128	-1.1156	-0.20961	1.62075	1.76628	1.36991	1.46677	2.66681	3.05573	3.86586	4.93526	0.98745	-0.675519	1.91977	0.764926	3.67959	1.57058	1.77224	0.624359	2.08765	1.65304	2.0956	2.47906	1.84377	1.30236	1.42107	1.26461	1.38829	-0.628332	4.8702	0.773867	-0.00248353	0.558793	17.7975
130	-0.780821	-0.566741	1.75536	1.63019	1.82341	1.5234	2.43584	2.95838	3.0001	4.52896	1.20848	-0.614425	1.54724	0.227988	2.93503	1.20054	2.01265	0.784795	1.93864	1.92722	2.1105	2.54065	1.88599	2.04593	1.48465	1.02321	1.25865	-0.792742	4.37498	1.06047	0.016888	0.68446	18.1715
132	-0.253816	-0.588099	1.98434	1.884	2.12739	1.76728	2.21878	3.0001	2.0802	4.26372	1.38283	-0.347197	1.57108	-0.0382463	2.28385	0.985463	2.22474	1.15186	1.91232	2.26994	2.14279	2.50985	1.97987	2.37177	1.78566	1.1762	1.03563	-0.796219	3.86933	0.824034	0.147521	0.646214	18.472
134	-0.265737	-0.38594	1.72754	2.11497	1.86612	1.885	1.89791	2.90821	1.58002	4.05709	1.2507	-0.305971	1.2517	-0.016888	1.80304	0.90301	2.24014	1.28994	1.78119	2.42144	2.08318	2.19146	1.94162	1.97341	1.96497	1.12951	0.796219	-0.628829	3.59416	0.790258	0.366072	0.822544	18.7159
136	-0.642737	-0.107288	1.14938	2.23716	1.42554	1.97341	1.5835	2.73039	1.52042	3.88821	1.19557	-0.414252	0.657638	0.323355	1.54624	0.843902	2.09709	1.27306	1.54873	2.44578	1.93119	1.79956	1.8696	1.51992	2.14279	0.665585	0.862281	-0.261764	3.57926	1.09524	0.534952	1.07586	18.9021
138	-0.757476	0.0551343	1.00036	2.47012	1.27554	2.2456	1.50849	2.67327	1.93914	3.81867	1.11908	-0.313421	0.501672	0.716249	1.52042	0.647704	2.02407	1.31279	1.46776	2.52475	1.89791	1.61082	1.97838	1.52389	2.46714	0.390907	0.976523	0.112752	3.86685	1.22388	0.392894	0.93629	19.153
140	-0.337263	0.0521541	1.07934	2.61168	1.37935	2.38667	1.53283	2.71102	2.41548	3.7834	1.04855	-0.234942	1.32769	0.955164	1.54177	0.237922	2.14626	1.4921	1.5224	2.65191	1.97589	1.56611	2.05288	1.68383	2.43833	0.587106	0.750522	0.327329	4.07845	1.63615	0.0913938	0.660618	19.5002
142	0.103811	-0.179807	0.736614	2.30322	1.0108	2.0052	1.23531	2.43882	2.18203	3.68804	1.05252	-0.463426	2.44131	0.794232	1.19408	-0.296036	2.07623	1.37538	1.39276	2.44776	1.83533	1.3113	1.75933	1.25915	1.84973	0.694394	0.38296	0.278155	3.89516	1.95454	-0.189245	0.72519	19.829
144	0.0670552	-0.47336	0.368555	1.95553	0.339747	1.65353	0.715752	1.99129	1.25418	3.46303	0.919898	-0.758469	2.72989	0.302494	0.496209	-0.752509	1.87357	0.962615	1.08033	2.07524	1.62323	0.884136	1.42654	0.762443	1.4022	0.456472	0.269711	-0.0993411	3.40988	1.52389	-0.46591	1.0103	20.2119
146	-0.320872	-0.529488	0.592073	2.01414	0.243882	1.80602	0.356138	1.81397	0.194709	3.0155	0.749528	-0.882645	1.76728	-0.094374	-0.150998	-1.18315	1.95305	0.930329	0.935296	2.17805	1.64608	0.6785	1.37885	1.1454	1.52538	0.159442	0.176827	-0.547866	2.70704	1.15484	-0.50962	1.10865	20.586
148	-0.600517	-0.357628	0.880659	2.31316	0.629326	2.09808	0.269214	1.89642	-0.273188	2.68668	0.68446	-1.1007	0.244876	-0.0834465	-0.441571	-1.54475	2.30074	1.24027	1.17669	2.58138	1.8542	0.727673	1.49608	1.84923	1.92573	-0.177324	-0.0516574	-0.753999	2.22971	1.03414	-0.252326	0.968575	20.5701
150	-0.59555	-0.105302	0.613431	2.45273	0.784298	2.20984	0.258784	1.97192	-0.119209	2.6832	0.63777	-1.40766	-0.740091	0.135601	-0.603	-1.6878	2.53916	1.41213	1.45634	2.74827	2.08219	0.69042	1.57654	1.98533	2.19295	-0.598033	-0.223021	-0.699361	2.20537	0.104308	-0.0645717	0.81261	20.3157
152	-0.967582	-0.0998378	0.198682	2.38021	0.577172	2.16762	0.0591079	1.8701	0.0745058	2.72493	0.316401	-1.33216	-1.08878	0.0685453	-1.09573	-1.79857	2.50588	1.49558	1.4618	2.77708	2.22772	0.483294	1.52936	1.72903	2.25256	-0.9045	-0.304977	-0.602504	2.42641	-1.09971	-0.0998378	0.813107	20.6426
154	-1.65949	-0.146031	0.396371	2.49743	0.469883	2.16613	-0.326335	1.67092	-0.13411	2.6236	0.259777	-0.897547	-1.08629	-0.142554	-1.89195	-2.07722	2.48055	1.68234	1.41064	2.93801	2.30471	0.268221	1.43796	1.66297	2.42889	-1.13348	-0.4674	-0.419219	2.44975	-1.14242	-0.183781	0.866254	21.333
156	-1.48912	0.193715	0.97851	2.73486	0.380476	2.18799	-0.662108	1.48664	-0.480314	2.49247	1.11411	-0.727177	-0.613928	-0.116726	-2.49247	-2.5029	2.56846	1.85122	1.35253	3.06517	2.31365	0.0844399	1.32819	1.54227	2.59876	-1.41462	-0.865758	0.0094374	2.25057	-0.133614	-0.268221	0.744065	21.3221
158	-0.261764	0.629822	1.59343	2.81632	0.291069	2.06878	-0.686943	1.40617	-0.363588	2.45571	2.11746	-0.825028	0.0531475	-0.0993411	-2.55654	-2.86599	2.69562	2.00073	1.31875	3.12825	2.36283	0.0486771	1.20451	1.20848	2.40604	-1.47223	-1.33912	0.259777	2.27342	0.949701	-0.204146	0.608961	21.0325
160	0.94672	0.845393	2.29478	2.89232	0.591576	1.94609	-0.479321	1.40866	-0.17335	2.29776	2.6529	-0.910461	0.0491738	-0.436107	-2.36084	-3.07113	2.91367	2.28584	1.46528	3.40392	2.58734	0.331799	1.18017	1.34508	2.1706	-1.23729	-1.57555	0.191232	2.31912	1.57754	-0.200669	0.671049	21.2818
162	1.63019	0.89556	2.82029	3.14116	1.02123	2.09957	-0.376503	1.45336	-0.493725	1.99576	2.81135	-1.15385	-0.815093	-0.663102	-2.50936	-3.06716	3.19332	2.53121	1.77572	3.76453	2.91963	0.637273	1.36991	1.91381	2.40654	-1.25964	-1.51644	0.302494	2.00023	1.6878	-0.533462	0.835458	21.7229
164	1.99775	0.678996	2.78453	3.27726	1.13895	2.44131	-0.433624	1.55568	-1.22637	1.75834	2.48899	-1.52439	-1.28647	-0.399848	-3.07858	-2.66681	3.4983	2.59529	2.06729	3.844	3.12527	0.623862	1.65552	2.09659	2.76466	-1.67886	-1.24226	0.513593	1.42703	1.34557	-0.85334	0.896056	21.9628
166	2.0057	0.219047	2.20736	2.90324	0.885129	2.33849	-0.753502	1.48912	-2.34097	1.42157	1.98285	-1.70271	-0.758966	0.00645717	-3.90758	-2.39511	3.56436	2.3663	1.9148	3.58621	3.08057	0.333289	1.63466	1.70767	2.53767	-2.24411	-0.951191	0.485778	0.762443	0.730157	-0.632306	0.85632	22.4446
168	1.07487	-0.348687	1.60684	2.29379	0.460943	1.84228	-1.31528	1.13199	-3.56287	0.813107	1.43548	-1.64757	-0.226994	0.130137	-4.74751	-2.67873	3.3165	1.9754	1.42753	3.24547	2.91715	0.0089407	1.23332	1.24375	1.94907	-2.79794	-0.930329	0.0327826	0.0268221	-0.404318	-0.271201	1.03017	23.8399
170	-0.080963	-0.779827	1.40617	2.11795	0.267228	1.69228	-1.6893	0.905991	-4.29104	0.352164	0.602007	-1.59144	-0.450015	-0.102321	-5.1717	-2.91864	3.16948	1.80155	1.21196	3.11186	2.84264	-0.145038	1.00881	1.09673	1.76777	-2.99166	-1.06841	-0.516077	-0.498195	-1.34756	-0.247359	1.29342	25.1621
172	-0.234445	-0.721216	1.68433	2.40654	0.543892	2.09361	-1.62621	1.05848	-4.31786	0.351171	0.245869	-1.4474	-1.39127	-0.240405	-5.12203	-2.68271	3.32892	1.97937	1.38531	3.34233	3.03437	0.0293056	1.30037	1.34359	2.20339	-2.85059	-0.887116	-0.524521	-0.629822	-0.987947	-0.0625849	1.22041	25.1934
174	0.203649	-0.0442068	2.24809	2.97924	1.18415	2.74678	-1.12702	1.48962	-3.81917	0.653168	0.917415	-0.947714	-2.22127	0.0228485	-4.64022	-2.16663	3.81718	2.48849	1.79559	3.81569	3.49184	0.580152	1.91778	1.83135	2.91318	-2.50787	-0.228981	0.107288	-0.461439	-0.0904004	0.030299	0.919402	24.6962
176	0.240902	0.714262	2.44627	3.49681	1.65204	3.28074	-0.634293	1.84526	-3.20077	0.77635	1.53085	-0.334779	-1.98682	0.185768	-4.02778	-1.87606	4.30991	2.94944	2.10802	4.30246	3.95228	1.206	2.41746	2.19593	3.40094	-2.15967	0.239412	0.819564	-0.261267	0.250836	-0.0874201	0.759463	24.6699
178	-0.188748	0.889103	2.11696	3.64184	1.85172	3.50277	-0.419716	1.95652	-3.05126	0.644724	1.78417	-0.324845	-0.821551	0.00149012	-3.70145	-1.87457	4.65016	3.15507	2.17011	4.72466	4.27216	1.62075	2.62807	2.48998	3.5271	-1.95603	0.030299	1.10765	-0.298023	0.703335	0.025332	0.887613	25.1412
180	-0.0193715	0.875195	2.08269	3.78639	2.26994	3.72032	-0.164906	2.22226	-3.28124	0.759959	2.36978	-0.664592	0.345707	0.119706	-3.52561	-1.51992	5.16226	3.50674	2.27441	5.19852	4.5836	1.95702	2.8789	2.90076	3.65525	-1.51893	-0.231961	1.14838	-0.485778	1.87854	0.280142	1.01129	25.636
182	1.04358	1.02768	2.55207	4.0864	2.60025	3.93937	0.0367562	2.39462	-3.40988	0.841916	2.60721	-0.530978	0.733634	0.495712	-3.29266	-1.13	5.46823	3.83059	2.3211	5.48512	4.67598	2.11895	3.03487	3.03686	3.86387	-0.913938	-0.189245	1.13298	-0.730157	2.58187	0.483791	0.812113	25.7154
184	2.31961	1.48813	3.37511	4.54684	2.8491	4.13309	0.221531	2.3524	-3.15656	0.80963	2.63105	0.110765	0.844399	0.733137	-2.8496	-0.925859	5.62817	4.12414	2.37574	5.67238	4.73013	2.32955	3.05623	3.18587	4.20064	-0.50962	0.0834465	1.4469	-0.859797	2.33203	0.635783	0.486771	25.3523
186	3.33339	2.20786	4.37697	5.18213	3.44018	4.45793	0.722706	2.67774	-2.85258	1.06692	3.29564	0.480314	1.42008	0.974536	-2.33253	-0.438591	6.14822	4.73807	2.76615	6.24706	5.20299	2.9405	3.38654	4.03573	4.64668	-0.238915	0.584126	2.31663	-0.793735	1.92374	0.756482	0.495215	25.1134
188	3.7243	2.66333	5.15481	5.74042	4.222	4.84536	1.24673	3.26037	-2.88288	1.45882	4.16736	0.484784	1.87854	1.20749	-2.15024	0.111759	6.76115	5.40862	3.24349	7.0254	5.81294	3.58174	3.92348	5.39869	4.9601	0.193715	1.10169	3.07759	-0.759463	2.13484	1.01527	0.741581	25.3648
190	3.61552	2.6991	5.59539	6.09855	4.76688	5.27352	1.59989	3.78788	-3.05275	1.84923	4.81308	0.749528	2.16812	1.42256	-2.12987	0.607967	7.15355	5.82685	3.68704	7.54098	6.22918	3.8897	4.38243	6.20584	5.21392	0.848373	1.49806	3.26385	-0.885129	3.16153	1.39624	0.755489	25.9673
192	3.19034	2.31067	5.62718	6.00219	4.54684	5.36342	1.58598	4.04567	-3.41435	2.0807	4.7192	0.713766	2.5933	1.39674	-2.20786	0.891586	7.1466	5.8348	3.81817	7.52707	6.29872	3.78489	4.52399	5.69969	5.25067	1.04904	1.60486	2.90573	-1.12802	3.70294	1.38183	0.620385	26.4848
194	2.61615	1.79559	5.24223	5.46376	4.01239	5.04255	1.31627	4.06454	-3.90112	2.19742	3.92298	0.030299	2.65886	1.10567	-2.44329	0.85483	6.91861	5.57403	3.59565	7.21614	6.13183	3.54697	4.39485	4.94421	4.92334	0.528991	1.39028	2.34544	-1.3113	2.8337	0.98596	0.555813	26.7009
196	2.20885	1.5984	4.93824	5.23478	4.17332	5.11706	1.60734	4.5071	-3.63986	2.82178	3.79632	-0.338753	2.30521	1.16924	-2.12044	1.24574	7.10885	5.52485	3.83556	7.32789	6.38813	3.86188	4.57515	5.20845	4.85579	0.312924	1.41462	1.9595	-0.935793	1.7946	0.876188	0.500182	27.2582
198	2.13236	1.77672	5.11011	5.58098	4.95017	5.79506	2.62111	5.41757	-2.487	3.9046	4.69188	0.0546376	2.08666	1.76877	-1.06444	2.17309	7.76698	5.81592	4.6591	7.89513	7.08749	4.6581	5.23229	5.94407	5.36491	0.778337	1.93914	1.88599	-0.0978509	2.07772	1.15236	0.453989	27.9884
200	2.39809	2.19047	5.60681	6.11941	5.69274	6.42588	3.65078	6.21726	-1.26561	4.88957	5.36243	0.555317	2.50091	2.10404	0.0884136	2.82178	8.36551	6.22173	5.43346	8.39581	7.65224	5.39819	5.89937	6.42687	5.8949	1.4469	2.34693	2.15272	0.723203	3.20425	1.29243	0.359615	28.0922
202	2.31465	2.20388	5.95848	6.40502	6.01212	6.62655	4.26869	6.71049	-0.385443	5.71708	5.29538	0.468393	3.07461	1.93218	0.799199	3.17295	8.59896	6.37621	5.89093	8.594	7.94778	5.86361	6.32952	6.76562	6.05732	1.88698	2.3971	2.25604	1.50551	4.17431	1.26759	0.417233	28.2109
204	1.8239	1.80006	6.2863	6.40849	6.21428	6.63251	4.66456	7.04626	0.203152	6.40154	5.21094	-0.107288	3.11931	1.80999	1.11361	3.57628	8.61486	6.30269	6.20286	8.56469	8.16236	6.18895	6.57439	7.30554	6.02603	1.97738	2.50091	1.95702	2.08318	4.7336	1.24872	0.653664	28.7736
206	2.15322	1.90089	6.9658	6.57936	6.73483	6.90917	5.19951	7.62244	0.798702	7.16249	5.54522	-0.0596046	3.14315	2.09808	1.72754	4.22448	8.75046	6.29524	6.6489	8.55724	8.51601	6.68963	6.88682	7.90954	6.24359	2.27938	2.98719	1.98086	2.60969	4.8543	1.34408	0.73264	29.028
208	2.96334	2.21978	7.4019	6.86745	6.98666	7.29263	5.50548	8.16683	1.15683	7.99298	5.64506	0.72519	3.4367	2.63949	2.3365	4.87119	8.77082	6.2719	7.02441	8.47777	8.71569	6.98715	7.18633	8.00888	6.6186	2.4428	3.59118	2.25852	3.03835	4.66108	1.70916	0.745555	29.1953
210	2.92857	1.90735	7.01894	6.78053	6.55403	7.33634	5.31375	8.26716	0.918408	8.45691	5.05845	0.888109	3.34481	2.55555	2.25206	5.0808	8.41071	6.01957	6.96381	8.13703	8.49913	6.69608	7.23998	7.43965	6.71943	1.89344	3.76801	2.16017	3.15358	4.1152	1.82639	0.883639	30.0313
212	1.9903	1.17968	5.74539	6.09756	5.74936	6.98119	4.9601	8.10723	0.778834	8.76139	4.19567	-0.000496737	2.8049	1.7489	1.89692	5.01027	7.78387	5.3818	6.61413	7.52161	8.09828	6.13729	7.02937	6.17703	6.35485	1.34657	3.63737	1.69277	3.33438	3.20127	1.35799	0.943244	31.0451
214	0.921885	0.565251	4.19865	5.35597	5.10712	6.48747	4.78874	8.06004	1.35501	9.33359	3.46353	-0.732144	2.19494	1.44442	1.89642	5.13792	7.24991	4.61737	6.38167	6.78102	7.69148	5.72254	6.7085	4.86523	5.70764	1.18166	3.63886	0.933309	3.80476	2.15769	1.04656	0.999371	31.9406
216	0.454485	0.136097	3.20623	5.03014	4.59949	5.9103	4.72019	7.98454	2.04891	9.80993	2.88785	-0.742078	1.5835	1.52389	2.14875	5.33958	6.7398	3.97414	6.12338	6.13133	7.18484	5.45134	6.32256	4.21604	5.13345	0.961125	3.61552	0.220537	4.25726	1.50204	1.08033	1.20103	32.8148
218	0.374516	-0.154475	2.95838	4.76837	4.00245	5.22584	4.58558	7.72377	2.48899	10.1636	2.57542	-0.940263	1.60486	1.3719	2.39462	5.38329	6.13232	3.43422	5.80202	5.6227	6.64741	5.16375	5.90036	3.88622	4.60893	0.738601	3.55343	-0.0476837	4.67946	1.73102	0.886122	1.3719	33.464
220	0.215073	0.000993411	3.49383	4.55926	3.54151	4.9601	4.5374	7.67112	3.15954	10.8818	2.53767	-1.35005	2.29875	1.39922	2.77013	5.56161	5.75433	3.23504	5.73347	5.37485	6.38763	4.93675	5.73943	3.53654	4.30693	0.973543	3.69002	0.0774861	5.43346	2.33104	0.46591	1.34756	33.6503
222	0.282625	0.671546	4.12365	4.72913	3.4973	5.27054	4.7192	7.9602	4.03672	11.7714	2.68221	-1.28845	2.78751	1.78417	3.30607	6.06676	5.71807	3.41634	5.84871	5.38578	6.43184	4.97152	5.97984	3.47694	4.50214	1.57058	3.91205	0.458459	6.37422	2.46068	0.437597	1.10318	33.3995
224	0.587106	1.19607	3.92695	5.05497	3.77645	5.61823	5.18411	8.38935	5.03063	12.4832	2.90275	-0.761449	3.06914	2.19246	3.88026	6.6941	5.8492	3.65923	6.11891	5.48114	6.61016	5.25663	6.29971	3.76503	4.81158	2.08765	4.25826	0.832975	7.2365	1.96298	0.841419	0.817577	33.3453
226	0.317891	1.00484	2.98371	5.00431	3.69002	5.48363	5.37684	8.51204	5.76327	12.9178	2.32259	-0.559787	2.71698	2.01563	4.18673	6.91811	5.68579	3.42975	6.2108	5.22484	6.56495	5.31177	6.27041	3.65674	4.66208	2.18799	4.44005	0.7237	7.8241	1.26511	0.867248	0.736117	34.0313
228	-0.364085	0.270704	2.13534	4.54585	3.13222	5.07285	4.9755	8.20905	5.60284	12.9958	1.32968	-0.865261	1.10219	1.39425	4.09385	6.62506	5.13544	2.74628	5.86311	4.58111	6.16858	4.9154	5.95053	3.30855	4.28259	1.8249	4.1758	0.195205	7.88271	1.01229	0.457962	0.871718	35.4007
230	-0.486275	0.0605981	1.96348	4.21753	2.70257	4.83046	4.47432	7.86036	5.0664	12.9407	1.28448	-1.09275	-0.369052	1.13199	3.74168	6.46015	4.61539	2.26448	5.4419	4.06553	5.6391	4.35114	5.6242	3.21517	4.11918	1.22537	3.844	-0.0710289	7.57873	0.834465	0.303487	1.08431	36.6708
232	-0.108282	0.544886	1.90586	4.04964	2.20637	4.51903	4.00841	7.57674	4.83443	12.8155	1.44094	-1.33365	-0.0953674	1.2065	3.16501	6.5729	4.10179	1.86016	4.97947	3.67264	5.06938	3.74566	5.19603	2.67575	3.88374	0.668069	3.68953	0.141561	7.41035	0.0188748	0.258287	1.24971	37.3135
234	-0.110765	0.340243	1.36048	3.53307	1.42157	3.9344	3.5271	7.22458	4.85132	12.6357	1.04507	-1.88798	0.962118	1.13597	2.49892	6.50684	3.45856	1.28001	4.41223	3.09745	4.41372	3.13967	4.58558	1.66496	3.26733	0.263254	3.46452	-0.0963608	7.46548	-0.285109	-0.0452002	1.43051	38.4614
236	-0.637273	-0.787775	0.740588	2.78602	0.931323	3.44117	3.31402	6.96133	5.13891	12.6412	0.713269	-2.60323	1.13149	0.848373	2.17259	6.32803	2.9092	0.909468	4.03374	2.60671	3.88821	2.82923	4.11272	1.01924	2.70506	0.0710289	3.17643	-1.21345	7.70191	0.389417	-0.663102	1.64857	40.7711
238	-0.926852	-1.39127	0.68148	2.62807	1.06792	3.50724	3.65674	7.19279	6.10799	13.2625	0.952184	-2.77907	0.912944	0.905991	2.62062	6.75072	2.93106	0.992914	4.17332	2.66284	3.92646	3.05871	4.21902	0.935296	2.85755	0.150998	3.46005	-2.00719	8.48969	0.622869	-1.00682	1.809	43.1076
240	-0.723203	-0.924369	1.08381	3.10838	1.37637	3.79483	4.33127	7.66367	7.51863	14.0334	1.71214	-2.18103	1.05848	1.45137	3.53555	7.51019	3.27528	1.20749	4.60992	2.91914	4.24931	3.48936	4.60098	1.01924	3.29216	0.291566	4.02033	-1.76926	9.46373	0.573198	-0.656148	1.8239	44.5142
242	-0.753005	-0.401338	1.19209	3.26931	1.27206	3.64482	4.59751	7.57277	8.18719	13.8089	2.17756	-1.84178	0.881155	1.6734	3.97662	7.45555	3.14415	1.04358	4.51008	2.6842	4.10626	3.54747	4.48128	0.847379	3.1655	0.243386	4.00593	-1.25964	9.58741	0.496705	-0.278155	1.78218	45.4778
244	-1.41064	-0.624855	0.934799	2.86549	0.867248	3.11385	4.19617	6.96083	7.463	12.7991	1.95454	-1.90338	0.0377496	1.42852	3.52611	6.79394	2.55704	0.660618	3.87977	2.12888	3.54747	3.17295	3.99202	0.543396	2.64943	0.0784794	3.79235	-1.24822	8.75294	0.0764926	-0.0720223	1.93169	47.3008
246	-1.72158	-0.841916	0.80665	2.53121	0.711779	2.64396	3.73175	6.4825	6.25898	12.1375	1.72059	-1.69873	-0.633796	1.43051	2.9246	6.55105	2.02755	0.490248	3.44763	1.82192	3.13272	2.85606	3.66618	0.487765	2.28534	0.0759959	3.94682	-1.36842	7.95573	0.0476837	0.17335	2.06927	49.4848
248	-0.982483	-0.291069	0.885129	2.70307	0.929832	2.57095	3.69002	6.42836	5.74291	12.0878	1.97788	-0.98894	-0.388424	1.81496	3.04431	6.82573	1.7489	0.601013	3.36667	1.81993	2.99066	2.90672	3.62297	0.743568	2.27839	0.201166	4.24186	-1.01378	7.78238	0.352661	0.347694	1.81794	50.5914
250	-0.195205	0.286102	0.970066	3.00159	1.20054	2.7885	3.75956	6.44674	5.67685	11.989	2.29478	-0.537932	0.351171	1.95007	3.33389	7.03434	1.63366	0.672539	3.25938	1.8244	2.84414	3.10044	3.69797	1.2512	2.43535	-0.0243386	4.33226	-0.582635	7.71284	0.268221	0.382463	1.60486	51.3782
252	-0.500679	-0.0958641	0.551343	2.63403	1.04407	2.8198	3.468	6.06229	5.23627	11.2866	1.72655	-1.37488	0.471373	1.4176	2.96136	6.71397	1.41909	0.285109	2.85854	1.60386	2.55406	2.97527	3.5579	1.48366	2.31117	-0.660618	3.9796	-0.767906	7.09891	-0.193218	-0.0769893	1.86165	53.7251
254	-1.36495	-1.24276	-0.127653	1.96993	0.839432	2.7587	3.18289	5.58843	4.57168	10.2952	0.885626	-2.45621	0.0248353	0.810623	2.55009	6.10054	1.36048	-0.197192	2.53518	1.4017	2.43584	2.80241	3.36021	1.30236	2.09759	-0.930826	3.55691	-1.60734	6.17256	-0.357628	-0.578165	2.25256	58.3683
256	-1.47571	-2.18153	-0.0645717	1.88599	1.07189	2.99662	3.30458	5.3828	4.06653	9.57052	1.09126	-2.42094	-0.0630816	0.763933	2.6981	5.67089	1.658	-0.248849	2.59131	1.44343	2.66433	2.99762	3.41833	1.26461	2.24511	-0.323852	3.51568	-2.36283	5.5328	0.124176	-0.396868	2.42392	63.5241
258	-0.323852	-1.89443	0.780821	2.3966	1.4618	3.47048	3.61751	5.45681	4.17928	9.37879	1.81347	-1.79956	-0.0173847	1.09971	3.28769	5.58744	2.06927	0.0759958	2.87294	1.64558	3.12726	3.39548	3.7387	1.52042	2.66333	0.539422	3.57529	-2.1254	5.49555	0.713269	-0.0670552	2.24759	66.784
260	0.544389	-0.72519	1.65353	2.98073	1.73102	3.84996	3.92	5.72751	4.76191	9.60827	2.15024	-1.4022	-0.233452	1.49955	3.75162	5.68281	2.3668	0.506639	3.1814	1.9297	3.58323	3.769	4.14352	1.84874	3.11782	0.779827	3.48389	-1.25666	5.82139	0.889599	0.0412265	2.0504	68.742
262	0.16739	0.208616	1.97887	3.35475	1.68383	3.95825	4.11967	5.90185	4.97699	9.6634	2.26746	-0.886122	-0.0531475	1.82341	3.71635	5.74589	2.44876	0.727673	3.36518	2.11746	3.82662	3.93788	4.39088	1.75188	3.34829	0.370542	3.51121	-0.563264	6.00368	1.10666	0.316401	2.0658	70.9414
264	-0.248353	0.59704	1.99725	3.69151	1.80155	4.04418	4.40578	6.07719	5.09769	9.6783	2.63502	-0.142554	0.778834	1.99825	3.78688	5.82685	2.63005	0.804663	3.65973	2.23517	4.05759	4.11719	4.45992	1.67688	3.36419	0.109772	3.71138	-0.110765	6.14375	1.71264	0.810623	1.93765	74.2023
266	-0.170867	0.68744	2.04444	4.00046	2.2769	4.29004	4.71572	6.35783	5.26309	9.91573	3.2718	0.152489	1.7484	1.94112	4.04219	6.0156	2.98619	0.904501	4.03573	2.43485	4.41025	4.41621	4.64171	2.13782	3.51618	0.336766	3.84649	0.152985	6.31809	2.04941	1.29193	1.73648	78.7392
268	0.470877	0.789761	2.00023	4.16885	2.22822	4.42564	4.59502	6.39906	4.6889	9.86705	3.93043	0.0119209	2.04792	1.57207	3.74267	6.08414	3.05772	0.959138	3.9796	2.55754	4.50462	4.36405	4.78576	2.22623	3.68704	0.407795	3.87629	0.370542	6.00517	1.47521	1.30534	1.74344	83.5165
270	1.60237	0.845889	2.17011	4.2369	1.81595	4.36803	4.13954	6.18199	3.46154	9.30875	4.2508	-0.213087	1.42753	1.23481	2.98768	5.90384	2.92609	1.0108	3.68853	2.56995	4.29501	4.04567	4.65214	1.79062	3.68903	0.0178814	3.71834	0.612934	5.05845	0.672539	0.894566	1.88351	88.0147
272	1.99427	0.608961	2.50439	4.22597	1.78466	4.3273	3.93291	6.11295	2.57293	8.83241	4.0253	-0.199179	0.450015	1.33862	2.6539	5.7747	2.98719	1.04705	3.66718	2.70655	4.25378	4.01884	4.55827	1.64757	3.77695	-0.482301	3.54697	0.628332	4.26571	0.55035	0.68893	1.9744	92.645
274	1.13398	0.0283122	2.29975	4.13954	2.17756	4.46538	4.28855	6.4224	2.638	8.94467	3.7998	0.207126	-0.435114	1.8388	3.24547	5.98282	3.37859	0.969569	3.95725	2.90026	4.52846	4.35611	4.76241	1.93318	3.97861	-0.386933	3.72231	0.0447035	4.19964	0.979006	0.911454	1.92026	97.6721
276	0.166396	-0.535945	1.75089	4.03076	2.78105	4.65165	5.0202	6.9499	3.38852	9.32912	4.12365	0.499686	-0.655651	2.337	4.45594	6.3474	3.88225	0.929832	4.58409	3.11633	5.02467	5.01523	5.15232	2.412	4.04418	0.90152	4.17282	-0.677009	4.5985	1.85668	1.24375	1.77125	103.179
278	-0.157456	-0.663102	1.59641	3.97017	3.15905	4.7187	5.6078	7.30405	3.93242	9.49601	4.44303	0.404815	-0.339746	2.38915	5.18461	6.50634	4.11868	1.01974	5.19902	3.3319	5.46227	5.58545	5.39223	2.76268	3.99997	2.21431	4.32183	-0.964105	4.88063	2.08865	1.43001	1.77026	109.09
280	-0.0506639	-0.365575	1.96497	4.02431	3.1357	4.76042	5.78761	7.37061	3.74963	9.51986	4.32829	0.249843	-0.0263254	2.29279	4.94719	6.42985	4.08938	1.06345	5.45432	3.29514	5.58347	5.65797	5.39571	2.75274	3.99997	2.01215	4.10924	-1.10616	4.69436	0.627836	1.49558	2.1259	114.801
282	0.25183	-0.0392397	2.68916	4.27514	3.0905	5.01772	5.95401	7.57774	3.43472	9.76672	4.46786	0.43263	0.952681	2.59131	4.70281	6.41098	4.22249	1.1757	5.71807	3.28769	5.73248	5.68877	5.58794	2.62906	4.26422	1.34408	4.24584	-1.20948	4.56174	-0.405808	1.64558	2.37375	119.747
284	0.181794	0.111759	3.39896	4.5682	3.22511	5.36392	6.28779	8.04166	3.56535	10.1725	4.81258	1.01328	2.34793	2.83817	4.87318	6.55999	4.45793	1.42058	6.09408	3.50972	6.11842	5.96394	5.97785	2.61813	4.674	1.45932	4.6427	-1.10219	4.8389	0.480811	1.7797	2.24908	124.62
286	-0.247359	0.306964	3.75956	4.61539	3.4521	5.64555	6.47157	8.38538	3.69946	10.3429	4.89304	1.30683	2.89927	2.57442	5.0053	6.61661	4.54535	1.58797	6.32207	3.64731	6.41147	6.28233	6.26792	2.77609	4.91639	1.92026	4.66953	-0.738104	4.98344	1.81595	1.72257	2.14179	130.41
288	-0.60002	0.192722	3.61403	4.44154	3.7536	5.86609	6.51379	8.5031	3.55889	10.1313	4.86672	1.02719	2.54164	2.39462	5.10315	6.50982	4.6432	1.6138	6.51479	3.72728	6.55552	6.55949	6.44873	3.07014	4.96755	2.07871	4.40876	-0.622869	4.78427	2.5938	1.84029	2.04941	137.469
290	-1.12454	-0.434121	3.01301	4.17531	4.04269	5.91079	6.61959	8.50807	3.17295	9.77218	4.62184	0.566741	1.82291	2.54512	5.18163	6.30816	4.89503	1.65155	6.75817	3.8902	6.67969	6.72887	6.48846	3.34183	4.84834	1.93467	4.28657	-1.02123	4.41273	2.38717	1.89344	2.01811	145.303
292	-1.81198	-0.934303	2.49942	3.98805	4.38442	5.98927	6.88235	8.61436	2.94	9.69271	4.03921	0.159442	1.03364	2.59628	5.22633	6.16858	5.29538	1.72704	7.07954	4.16835	6.94493	6.95388	6.57886	3.74764	4.77384	1.96	4.4326	-1.44492	4.27365	1.33117	1.5522	2.24511	152.906
294	-2.57045	-1.53879	2.09014	3.7998	4.55628	6.04639	6.99858	8.6536	3.02146	9.75877	3.45508	-0.269214	0.404815	2.25504	5.19554	5.96146	5.60433	1.57853	7.22359	4.35809	7.17143	7.11828	6.63946	4.1614	4.68343	2.06629	4.37349	-2.24809	4.39882	0.898043	1.09176	2.57442	160.179
296	-2.94348	-2.09759	1.63515	3.5877	4.36654	5.80351	6.76413	8.37545	2.71102	9.52184	3.22411	-0.46591	0.573695	1.78466	4.93179	5.5939	5.57601	1.26859	7.02739	4.30346	7.05818	6.94642	6.39757	4.19418	4.39286	2.04593	3.90609	-3.15358	4.29749	1.44492	0.778834	2.61168	166.767
298	-2.02556	-1.44194	1.82291	4.05858	4.49767	6.00567	6.83318	8.41171	2.38915	9.573	3.86983	0.198682	1.91828	1.97192	5.10116	5.67635	5.82288	1.61926	7.15703	4.55976	7.17739	7.02689	6.46909	4.31041	4.74403	2.47508	3.96421	-2.75771	4.30246	2.04593	1.01775	2.32061	172.257
300	-0.521044	0.154972	2.53916	5.13842	4.89006	6.85751	7.22359	8.92282	2.38518	10.0225	5.10961	1.43697	3.26782	2.84761	5.65201	6.13133	6.43532	2.52624	7.68254	5.27799	7.70936	7.41581	7.01497	4.61787	5.75483	2.9852	4.65065	-1.28398	4.52201	2.24759	1.8388	2.15967	177.559
302	-0.108778	0.959138	2.66631	5.49903	4.72069	7.06961	7.07159	9.0157	2.13881	10.0568	5.67834	1.87109	3.45657	3.19084	5.58794	6.09507	6.47406	2.77658	7.73768	5.49754	7.77642	7.32889	7.13716	4.4619	5.9396	2.63751	4.74453	-0.520547	4.39733	2.38468	2.42442	2.21332	182.957
304	-0.989437	0.0571211	2.18252	4.97599	4.26173	6.48201	6.51479	8.69135	1.73102	9.8139	5.24372	1.18961	2.88685	2.62509	4.99735	5.67238	6.12736	2.3067	7.387	5.09371	7.38452	6.85453	6.82374	3.95825	5.27203	1.8398	4.15643	-1.30335	4.09832	2.5779	2.35389	2.36134	189.224
306	-2.10106	-1.27852	2.07424	4.87169	4.33028	6.49591	6.51926	8.81056	1.92573	10.0171	4.38144	0.6785	2.53916	2.23964	4.95364	5.64754	6.30915	2.21928	7.51714	5.14239	7.45853	6.83367	6.91861	3.9051	5.28842	1.67787	3.99997	-2.38915	4.32183	2.72244	2.31465	2.56697	197.016
308	-2.59181	-1.55717	2.90026	5.61625	4.91192	7.38154	7.10636	9.36737	2.6678	10.5028	3.9498	0.842412	2.23219	2.55207	5.69522	6.04689	6.97573	2.77609	8.10872	5.82089	8.01534	7.27226	7.37061	4.49171	6.20286	2.23319	4.40876	-2.68767	4.91639	2.89728	2.52277	2.63155	204.253
310	-2.58138	-1.50551	3.66469	6.12189	5.14934	7.94927	7.30803	9.50595	2.90622	10.5565	4.07994	0.98149	1.49757	2.89083	6.11295	6.04341	7.35074	3.13322	8.32131	6.28432	8.26965	7.43965	7.5375	4.80562	6.86795	2.60075	4.56969	-2.70357	5.0505	2.84215	2.3822	2.63701	209.996
312	-2.38617	-2.20935	3.60062	5.73198	4.90447	7.68056	7.03136	9.15726	2.71549	10.2768	4.13954	0.650187	1.31329	2.93404	5.95152	5.58197	7.20769	2.96682	8.12709	6.28928	8.08487	7.33336	7.38402	4.3864	6.78301	2.4875	4.297	-2.95738	4.92732	2.35289	1.99626	2.70307	216.008
314	-1.9595	-2.96136	3.8589	5.44488	5.03759	7.52409	7.04229	9.07729	2.92659	10.2729	4.27564	0.459453	2.26945	3.10888	5.98977	5.32766	7.16895	3.01103	8.25326	6.3171	8.00043	7.48336	7.35621	4.28806	6.64989	2.43783	4.2508	-3.02494	5.05596	1.61032	2.04941	2.72542	222.703
316	-1.67539	-3.17494	4.51306	5.71211	5.46873	7.80672	7.3269	9.24965	3.50922	10.3787	4.75893	0.582139	3.21418	3.48638	6.3166	5.14934	7.37409	3.33637	8.56717	6.5739	8.11865	7.75804	7.44214	4.81208	6.78748	2.68867	4.55876	-2.91119	5.34107	1.12454	2.35687	2.49197	228.551
318	-2.44677	-3.63737	4.08192	5.68926	5.42104	7.70887	7.3423	9.17117	4.02381	10.3777	5.10762	0.344217	3.21865	3.59118	6.32554	4.88162	7.34528	3.24845	8.5026	6.70354	8.08388	7.73966	7.32193	5.01871	6.65685	2.91318	4.69734	-3.61403	5.61575	1.15037	2.41597	2.34892	233.992
320	-4.11371	-4.52499	2.62558	5.29935	5.13146	7.46747	7.15802	9.09716	4.10477	10.4686	4.92732	0.0745058	3.12775	3.50028	5.9098	4.95017	7.30157	2.99662	8.36452	6.67572	8.03471	7.59959	7.20918	4.89006	6.35187	2.96285	4.67151	-4.97003	5.72503	1.69625	2.39809	2.51333	240.516
322	-4.97252	-4.92285	1.70569	5.051	5.16077	7.48138	7.04527	9.15031	3.75112	10.5967	4.58707	0.0745058	3.35028	3.44415	5.49406	5.20845	7.47691	3.1203	8.3973	6.87093	8.06799	7.52757	7.25885	5.04106	6.31561	2.9395	4.66307	-5.45979	5.67138	2.48551	2.43882	2.63602	246.778
324	-4.32481	-4.32134	2.4125	5.37336	5.38776	7.55688	6.87242	9.07679	3.09894	10.5172	4.63078	0.25183	3.14116	3.4079	5.15381	5.11209	7.68105	3.58174	8.35359	7.25637	7.91401	7.39396	7.19229	5.36044	6.55899	2.65638	4.58807	-4.85381	5.43992	2.50985	2.40902	2.68618	250.811
326	-3.79433	-3.88573	4.02381	5.89887	5.27749	7.6582	6.4075	8.78523	2.36233	10.181	4.83841	0.256797	2.35836	3.32097	4.61092	4.71473	7.65721	3.96818	8.01186	7.51118	7.54247	7.0259	7.01249	5.26657	6.90222	1.8994	4.4023	-4.54883	5.04454	1.78615	2.0653	2.84264	254.133
328	-4.42068	-4.68691	4.90695	5.80748	4.63376	7.55787	5.77271	8.3223	1.93069	9.7697	4.52747	-0.452995	1.36097	2.94447	3.8743	4.32432	7.3572	3.95377	7.4327	7.43469	7.09643	6.47952	6.73731	4.71274	6.88434	1.03116	4.11222	-5.15232	4.74205	1.14242	1.43747	3.06517	258.871
330	-5.32816	-5.82685	4.88609	5.45233	4.40826	7.48336	5.57303	8.10077	2.27193	9.60827	3.89814	-1.07338	0.713766	2.58585	3.68804	4.1763	7.29909	3.98507	7.15305	7.39942	6.91513	6.31809	6.56446	4.58906	6.6489	0.668069	3.90659	-5.79407	4.899	1.09524	1.22786	3.23703	264.045
332	-5.7444	-6.39558	4.45793	5.4573	4.91589	7.61549	5.91775	8.25028	3.27826	9.81738	3.36419	-1.16328	0.571211	2.27292	4.32829	4.19269	7.58668	4.1907	7.35074	7.67062	7.11779	6.69559	6.66678	5.03113	6.62208	0.855327	3.91155	-5.89689	5.55168	1.67787	1.38879	3.15756	268.321
334	-5.54572	-6.48449	3.67314	5.51095	5.2159	7.62592	6.18597	8.37793	3.95079	10.0454	3.17395	-1.41015	0.991921	1.93963	4.97897	4.22647	7.78983	4.22845	7.58568	7.91401	7.31448	6.95686	6.75966	5.0361	6.69708	1.4166	3.96172	-5.61873	6.07322	2.31663	1.40468	2.8342	272.022
336	-5.17617	-6.21527	3.50078	5.59439	5.32269	7.72128	6.27488	8.4887	3.87927	10.17	3.79781	-1.46329	1.88351	2.20935	5.13544	4.34667	8.02527	4.36058	7.82808	8.19912	7.50025	7.09494	6.90967	4.91689	6.90719	2.28584	4.1455	-5.33561	6.23862	2.69016	1.76678	2.74877	275.597
338	-5.06441	-5.61426	4.26769	5.98431	5.71012	8.05209	6.34342	8.61337	3.39001	10.2475	4.75446	-1.09524	2.18252	2.88635	4.83046	4.45793	8.39879	4.70231	8.06103	8.60492	7.74364	7.24296	7.17938	5.49356	7.2519	2.67923	4.38541	-5.27799	6.16858	2.45621	2.14477	2.95887	278.267
340	-5.15878	-5.04156	4.75248	6.48846	6.07818	8.36154	6.40502	8.69781	3.11832	10.3628	4.96556	-0.809133	1.68433	3.38256	4.44104	4.45942	8.71718	4.97152	8.18272	8.9094	7.92841	7.19875	7.36962	6.24657	7.51267	2.18848	4.598	-5.39074	6.14375	1.78317	2.02209	2.9544	279.958
342	-5.33909	-4.7947	4.80264	6.80884	6.26495	8.60592	6.59625	8.91288	3.39448	10.7204	4.33326	-0.626346	1.43399	3.89218	4.46985	4.66605	9.00576	5.13941	8.43058	9.23226	8.18819	7.34031	7.56284	6.52472	7.69198	1.8249	4.93576	-5.47022	6.54608	1.46528	2.17756	2.86251	282.401
344	-5.61625	-5.20051	4.72566	6.80784	6.25004	8.70824	6.6027	9.00328	3.40889	10.772	3.38852	-0.641247	1.26809	4.15544	4.57168	4.78129	9.10213	5.14587	8.62628	9.42548	8.31236	7.57972	7.63983	6.37919	7.7799	1.79559	5.14835	-5.82486	6.70304	1.19209	2.59976	3.08007	285.995
346	-5.62171	-5.77172	4.47482	6.77605	6.21925	8.70377	6.36975	8.84533	3.02444	10.2724	2.80639	-0.650684	1.12802	3.88225	4.46041	4.59502	8.97398	5.15232	8.6089	9.39121	8.22842	7.60108	7.59164	6.2714	7.81963	1.51247	5.18312	-6.18696	6.25998	0.968079	2.72989	3.2266	289
348	-5.26309	-5.5174	4.11272	7.03981	6.47704	8.89748	6.33647	8.8344	2.92659	9.87649	3.15408	-0.233948	1.58399	3.67413	4.42217	4.54386	9.02017	5.41608	8.63026	9.38078	8.25127	7.67807	7.7337	6.53019	8.00143	1.50899	5.27253	-5.79804	5.98778	1.81993	2.74678	2.92013	290.692
350	-5.33561	-5.29389	3.53903	7.16349	6.44078	9.00974	6.20037	8.81553	2.83519	9.62814	3.7084	-0.142058	1.8994	3.67761	4.29402	4.5071	8.96653	5.39372	8.54681	9.21388	8.18024	7.61847	7.86483	6.53664	8.07842	1.9446	5.12848	-5.44339	5.86907	2.85258	2.53369	2.61217	292.453
352	-5.95848	-6.00368	2.85705	6.76314	5.7886	8.70724	5.75781	8.47429	2.57194	9.26803	3.65327	-0.910958	1.85072	3.5127	4.03623	4.25478	8.46932	4.75645	8.15243	8.72463	7.78288	7.17938	7.65274	5.76923	7.78834	2.30422	4.5831	-5.83728	5.62569	2.77956	1.86563	2.67625	294.904
354	-6.37025	-6.8138	2.66184	6.36727	5.07981	8.4276	5.40415	8.19912	2.55356	9.03855	3.38654	-1.73897	2.13136	3.32693	4.04517	4.20163	7.94679	4.12613	7.80622	8.22395	7.43767	6.74327	7.44561	4.62135	7.53949	2.46366	4.34468	-6.40402	5.53926	2.16613	1.34011	2.85804	297.161
356	-6.5287	-7.011	3.10888	6.43879	4.82053	8.518	5.33859	8.24034	2.49495	8.91089	3.25392	-1.83185	2.55307	3.33289	4.1455	4.43012	7.83453	4.00941	7.74115	8.02129	7.35621	6.57787	7.55588	4.01139	7.71781	2.47359	4.70082	-6.67522	5.43048	1.64459	1.51346	2.88785	298.69
358	-6.51975	-6.87192	3.51121	6.784	5.11557	8.85626	5.41111	8.51949	2.30372	8.83838	3.25143	-1.27902	2.78652	3.55492	4.17829	4.70231	8.1107	4.34717	7.89811	8.23339	7.51019	6.70006	7.88222	4.37101	8.16186	2.37375	5.17617	-6.65287	5.21193	1.23084	2.23517	2.84314	299.596
360	-6.14723	-6.9658	3.7839	6.97623	5.70466	9.25461	5.53727	8.84583	2.37077	8.94119	3.50624	-0.972052	2.98371	4.0253	4.30296	4.93824	8.51254	4.79221	8.15044	8.69979	7.84695	7.06563	8.22097	5.23577	8.51899	2.31912	5.60433	-6.47207	5.29438	1.05898	2.7592	2.93205	300.752
362	-6.07272	-7.60307	4.29501	6.75221	6.14375	9.41952	5.58694	9.02613	2.36034	9.06438	3.76652	-1.25815	3.20474	4.48972	4.30395	5.09669	8.7137	4.95911	8.30889	9.0008	8.14895	7.36068	8.42959	6.0603	8.53588	2.37574	5.91079	-6.56694	5.4727	1.66595	2.75522	3.13322	303.143
364	-7.08153	-8.58307	4.38938	6.33349	6.0161	9.37929	5.45134	9.10511	1.95603	9.07381	3.40293	-1.70767	3.17494	4.75198	4.04269	5.2621	8.57363	4.64767	8.23687	8.72264	8.07345	7.13219	8.50012	6.04441	8.33124	2.3211	6.02206	-7.36415	5.22981	2.64893	2.47459	3.30508	305.831
366	-8.29448	-9.31223	3.59068	6.0151	5.47121	9.33508	5.13842	9.02265	1.24723	8.69433	2.58287	-2.18054	2.95093	4.66555	3.66916	5.19554	8.16584	4.12812	7.9001	8.17925	7.72874	6.68665	8.48025	5.12252	8.16236	2.21531	6.01063	-8.21302	4.60396	2.56449	2.01613	3.3473	307.094
368	-8.42313	-9.5288	2.79645	5.95301	5.33859	9.36439	5.11706	8.9859	1.19557	8.3074	2.0499	-2.65787	2.96384	4.41968	3.76006	5.06192	8.01136	3.99152	7.75407	8.07345	7.68354	6.75668	8.57164	4.80463	8.13504	2.54263	6.03845	-8.19862	4.4023	2.04792	1.72953	3.20921	307.028
370	-7.75357	-9.56754	2.68916	6.20236	5.77768	9.53476	5.48611	9.29038	2.04742	8.47975	2.08716	-2.7294	2.83122	4.48277	4.36554	5.26408	8.29895	4.27266	8.05954	8.38935	7.92096	7.15454	8.87662	5.51939	8.22047	2.9241	6.06229	-7.74165	4.8389	2.30273	1.94758	3.02444	306.775
372	-6.62158	-9.26654	3.24498	6.63052	6.19491	9.85265	5.87751	9.76225	2.58784	8.85477	2.75473	-2.0047	2.27839	4.79072	4.96109	5.55764	8.74847	4.64171	8.48124	8.8647	8.24432	7.49081	9.24468	6.29574	8.52247	2.90821	5.97835	-7.37657	5.16623	2.81682	2.59827	2.9549	306.639
374	-5.32468	-8.54582	4.21703	7.05471	6.53416	10.1989	6.35087	10.183	2.61962	9.18657	3.80774	-1.1459	2.04295	4.7947	5.59837	5.79456	9.22531	5.09918	8.96305	9.34253	8.67844	7.97361	9.62218	6.72638	8.87613	3.11434	5.96046	-6.96629	5.29339	3.21517	3.10143	2.91566	306.34
376	-4.96109	-8.49863	4.96656	7.09395	6.71198	10.3066	6.74228	10.3777	2.52326	9.36588	4.31091	-1.36246	2.2317	4.36157	6.05683	5.84722	9.4831	5.27451	9.32217	9.47515	9.07431	8.36601	9.82086	6.84609	8.88755	3.44813	6.0151	-6.77804	5.39223	3.28869	2.80986	2.77112	306.175
378	-5.70218	-9.28889	5.20994	6.76513	6.60817	10.2724	6.78053	10.4288	2.23468	9.28889	3.90013	-2.40952	2.92261	4.05212	5.90781	5.74291	9.53774	5.0356	9.47366	9.38127	9.32018	8.39184	9.84321	6.71546	8.79665	3.4367	5.98331	-7.16945	5.37733	2.49396	2.16862	2.56151	306.563
380	-6.62555	-10.0051	5.15928	6.5128	6.58135	10.4214	6.79394	10.5843	1.81943	9.19998	3.44217	-3.11981	4.07547	4.25875	5.46575	5.84324	9.6485	4.84089	9.66787	9.41455	9.47018	8.35508	9.92417	6.54956	8.88209	3.43025	6.04937	-7.86483	5.27153	1.92871	1.92175	2.44131	307.004
382	-7.18882	-10.3106	4.92285	6.40849	6.6335	10.6946	6.87689	10.7934	1.36147	9.26008	3.52462	-3.19034	4.66704	4.77185	5.33859	6.19243	9.78212	4.749	9.86357	9.40412	9.58641	8.42909	10.1835	6.37422	8.95212	3.71883	6.47654	-8.32776	5.05298	2.57989	1.99725	2.52426	306.637
384	-7.43816	-10.4959	4.59005	6.2411	6.67026	10.6643	6.92954	10.7616	0.9045	9.06239	3.43025	-3.03984	4.12464	5.08378	5.72602	6.20186	9.80149	4.57118	9.8139	9.28491	9.5884	8.52744	10.254	6.25948	8.77877	3.88871	6.77158	-8.51154	4.57813	2.84314	2.12441	2.71052	305.593
386	-7.65274	-10.6901	4.11322	5.89887	6.64393	10.2992	6.87788	10.3772	0.34521	8.20359	2.93305	-3.10789	3.0453	4.85579	6.04391	5.53975	9.61224	4.29402	9.53873	9.07332	9.36786	8.49018	9.90729	6.22024	8.38786	3.45161	6.39757	-8.7286	3.75509	2.09361	2.15371	2.87096	304.308
388	-7.72377	-10.7308	3.66668	5.75185	6.6941	10.1477	6.83069	10.0906	-0.0481805	7.45952	3.10938	-3.26584	2.6226	4.42664	5.93364	4.85927	9.51737	4.14948	9.37879	8.98838	9.18855	8.46386	9.59933	6.30667	8.27511	3.13272	5.71609	-8.7137	3.1352	1.76877	2.1706	2.83569	302.531
390	-7.26531	-10.4954	3.91503	6.07669	7.18286	10.3503	7.11779	10.1661	0.116726	7.46995	4.08491	-3.09199	3.3622	4.05461	5.85169	4.7043	9.76771	4.42713	9.58592	9.25312	9.3326	8.71122	9.56903	6.76264	8.52644	3.68903	5.32319	-8.25077	3.15011	2.32359	2.27044	2.55307	300.247
392	-6.7244	-10.1368	4.78228	6.42687	7.71582	10.5187	7.52658	10.4174	0.241895	7.84397	4.98841	-2.74082	4.23938	3.68754	6.02752	4.89652	10.0215	4.94371	9.92815	9.6192	9.58641	9.10461	9.6331	7.32094	8.70178	4.46488	5.51045	-7.86384	3.46899	3.35773	2.38667	2.34097	298.288
394	-6.57489	-10.1467	5.44041	6.38515	7.66317	10.4686	7.73768	10.556	0.131627	8.15441	5.28793	-2.92212	4.47134	3.52561	6.29822	5.07434	9.96689	5.19305	10.098	9.73294	9.66986	9.29286	9.62118	7.4476	8.71619	4.67648	5.89738	-7.93884	3.71983	3.9041	2.34892	2.43882	297.183
396	-6.30915	-10.4785	5.56161	6.25998	7.36217	10.2977	7.73917	10.399	0.270704	8.17329	4.80513	-3.55939	4.66108	3.66469	6.35336	5.0659	9.73791	5.13345	9.98427	9.62466	9.53873	9.22829	9.46571	7.36465	8.74301	4.40776	5.8795	-8.17577	3.83556	3.78191	1.97788	2.58833	295.842
398	-5.45233	-10.258	5.95848	6.62406	7.69844	10.3896	7.86285	10.3479	0.933309	8.25326	4.41621	-3.50873	5.49207	4.18921	6.42588	5.1414	9.91176	5.34107	9.97931	9.78957	9.52979	9.38525	9.42201	7.54495	8.98391	4.39684	5.76576	-7.77791	4.13507	4.14004	1.96695	2.48502	293.525
400	-5.03709	-10.0767	6.81629	6.96133	8.26369	10.5257	8.07842	10.4214	1.63565	8.46535	4.82351	-3.22511	5.98729	4.48575	6.76066	5.16872	10.2798	5.70267	10.0841	10.1209	9.58989	9.72946	9.42945	7.73221	9.15527	4.70728	5.83778	-7.09047	4.49469	4.49171	2.15371	2.45521	291.665
402	-6.1959	-11.0313	6.70999	6.48201	7.98057	10.1303	7.58717	9.87351	1.0858	7.97262	4.90993	-3.79433	4.56274	4.11024	6.53714	4.64072	9.99719	5.53876	9.55661	9.99172	9.12299	9.38276	8.91387	7.45455	8.79963	4.49568	5.73049	-7.3567	3.92993	3.67711	1.7191	2.86351	291.236
404	-7.51813	-11.9612	5.78165	6.00616	7.11332	9.5884	6.51131	9.10511	-0.574192	7.18584	4.54088	-4.06454	2.37773	3.78489	5.61227	4.08838	9.35843	5.13842	8.56767	9.62168	8.33919	8.37495	8.24183	6.86248	8.46336	3.81817	5.53727	-8.0963	2.75969	2.50687	1.36544	3.24299	290.766
406	-7.63337	-12.2453	5.28892	6.06676	6.48052	9.35545	5.72403	8.78374	-1.64956	7.00901	4.10924	-3.79284	1.7638	3.7695	4.78973	4.00643	8.9546	4.89652	7.98156	9.35743	7.80225	7.63287	7.96864	6.3628	8.49366	3.17941	5.52287	-8.41419	2.24958	2.29379	1.47422	3.2117	289.27
408	-7.33634	-12.667	5.09868	6.02851	6.17703	9.1518	5.46326	8.62728	-1.55121	7.21961	3.38952	-4.13507	2.90771	3.79135	4.38541	4.0864	8.68589	4.66009	7.80324	9.04202	7.49727	7.36614	7.77145	6.13183	8.32478	2.91268	5.4881	-8.52843	2.42194	2.82675	1.56114	3.13073	287.602
410	-7.39793	-12.9854	4.75993	5.76625	6.0752	8.7892	5.42104	8.36253	-0.964105	7.24246	2.65986	-4.77582	4.02232	3.72877	4.31736	4.01735	8.33273	4.39336	7.54992	8.75592	7.22806	7.27475	7.48932	6.15368	7.91003	3.10242	5.29339	-8.46585	2.6688	3.28124	1.4618	3.18537	286.195
412	-7.52807	-13.0415	4.61241	5.66343	6.2416	8.61436	5.54621	8.24432	-0.0948707	7.22011	2.48154	-4.92334	4.17382	3.70542	4.63029	3.88573	8.08487	4.28756	7.45704	8.72562	7.05471	7.41134	7.44611	6.37919	7.75903	3.39051	5.277	-8.08587	3.18289	3.47743	1.48366	3.11633	284.576
414	-7.46101	-13.2898	4.33773	5.45631	6.32852	8.57512	5.59886	8.15739	0.623862	7.32044	2.5928	-4.73956	3.8589	3.56783	4.91142	3.71734	7.96368	4.21802	7.40091	8.56966	6.82324	7.45902	7.35472	6.55651	7.72476	3.30756	5.36243	-8.10921	3.65625	3.24746	1.62919	2.94099	282.467
416	-7.24842	-13.6599	3.40889	5.00133	6.02653	8.40078	5.21292	7.78784	0.492235	7.19279	2.51283	-4.60396	2.96583	3.31004	4.73758	3.40243	7.65324	3.96073	6.92904	8.18918	6.34889	7.10487	7.02341	6.60568	7.613	2.83072	5.2313	-8.69085	3.47147	2.62509	1.4921	2.90175	280.645
418	-6.67771	-13.7359	2.81235	4.71373	5.65847	8.21501	4.89255	7.39892	0.350177	7.06265	2.38965	-4.46588	1.79112	3.32395	4.72267	3.13769	7.35323	3.78837	6.50336	8.03471	5.98927	6.87341	6.75172	6.55105	7.58618	2.74728	4.98295	-8.88904	3.33836	1.97341	1.22786	2.91367	279.121
420	-6.06229	-13.3877	3.25938	4.69834	5.58893	8.03421	5.01076	7.26779	0.821551	7.35521	2.58386	-4.44253	1.73599	3.51518	5.09073	3.15458	7.30207	3.82115	6.48052	8.07097	5.91129	6.96282	6.62704	6.43382	7.43618	3.28769	4.74801	-8.55078	3.82215	1.84625	1.07239	2.88884	276.857
422	-6.27786	-13.2496	3.93589	4.64519	5.59737	7.74761	4.98692	7.18236	0.823538	7.48336	2.64645	-4.89056	2.94099	3.51022	5.10166	3.22064	7.15007	3.6632	6.37571	7.95921	5.75831	6.95487	6.48052	6.20931	7.08401	3.51816	4.53989	-8.46783	4.10875	2.01166	0.855327	2.82675	274.095
424	-7.36117	-13.8303	4.42912	4.44154	5.42601	7.53403	4.70281	7.10736	0.320375	7.33336	2.34395	-5.31326	4.23392	3.37611	4.85182	3.22908	6.84708	3.39796	6.09259	7.74016	5.51343	6.7234	6.29971	5.71559	6.86795	2.96036	4.55479	-9.03855	3.94781	1.91132	0.763933	2.82824	272.029
426	-8.32031	-14.4233	4.81258	4.37448	5.23776	7.54098	4.61787	7.11232	0.160933	7.40488	2.28931	-5.27948	4.55628	3.38157	4.85281	3.29415	6.67423	3.38405	5.96493	7.67559	5.42998	6.61314	6.26991	5.23031	6.91811	2.41746	4.93427	-9.60877	3.92099	2.13732	1.16726	3.05374	270.582
428	-8.65956	-14.4308	4.77135	4.47383	5.15878	7.6592	4.67598	7.02242	0.51856	7.46151	2.39809	-5.24571	3.70791	3.54946	4.96507	3.27528	6.54459	3.53158	5.96493	7.74463	5.37634	6.68665	6.29624	5.23031	7.05272	2.61118	5.22832	-9.80099	4.08739	2.96881	1.43598	3.29365	268.506
430	-8.70377	-14.3384	4.36803	4.51455	5.29041	7.66665	4.73162	6.87689	1.12106	7.42724	2.46416	-5.43743	2.66433	3.83904	5.04901	3.23156	6.40849	3.60509	5.99871	7.68552	5.16921	6.76811	6.14077	5.66939	7.02937	3.26484	5.08527	-10.0598	4.33773	3.10888	1.14093	3.27975	265.623
432	-8.14199	-14.1581	4.14848	4.74105	5.7896	7.64231	4.87914	6.91563	1.43598	7.66963	2.91218	-5.44091	2.3673	4.28806	5.06739	3.40641	6.51181	3.71387	6.09557	7.69844	5.10017	6.98219	6.08365	6.32157	7.06116	3.7238	5.05	-10.0444	4.64569	2.89132	1.09673	3.07908	262.444
434	-7.28021	-13.7036	4.37051	5.15282	6.35733	7.81616	5.11954	7.16696	1.42803	8.15739	3.47445	-5.04951	2.92112	4.68145	5.02865	3.75559	6.84361	3.93788	6.23912	8.02626	5.29736	7.35025	6.32207	6.77158	7.43071	3.68009	5.48164	-9.38674	4.95861	3.42876	1.64757	3.08653	259.596
436	-7.54495	-13.8626	4.58409	5.10911	6.27637	7.81218	5.05696	7.14709	1.2507	8.26418	3.42478	-4.91242	3.53257	4.6437	4.84586	3.76701	6.77705	3.81768	6.15716	8.02825	5.2765	7.4019	6.33846	6.39061	7.5683	3.18835	5.70963	-9.14683	5.04752	3.35922	1.98583	3.24498	257.671
438	-8.36949	-14.6617	4.49767	4.78725	5.8502	7.60009	4.80314	6.87391	1.13199	8.03818	2.92758	-5.27948	3.50575	4.33226	4.76539	3.53704	6.32405	3.34978	5.9103	7.51366	5.02616	7.17789	6.05534	5.71311	7.3274	2.95738	5.56111	-9.71556	5.00182	2.46217	1.7946	3.13471	256.182
440	-8.08438	-15.1897	4.41819	4.63923	5.84175	7.55092	4.84387	6.85304	1.35402	8.03818	2.67178	-5.62221	3.29117	4.32779	4.94371	3.468	6.1209	3.08603	5.88596	7.17143	4.96805	7.14163	5.94854	5.86857	7.06514	3.45955	5.42253	-10.1844	5.11557	2.49495	1.68929	2.83221	254.41
442	-6.99758	-14.9126	4.28855	4.72764	6.12984	7.59562	5.06938	6.92805	1.68979	8.08785	3.14713	-5.33362	3.1814	4.44601	5.1116	3.5574	6.26246	3.17593	5.95301	7.21862	5.08775	7.36614	6.01858	6.66728	6.95785	4.15593	5.33412	-9.92169	5.1553	3.41187	1.86463	2.63502	251.907
444	-6.42737	-14.3756	3.50674	4.75496	6.1363	7.3577	4.86275	6.53714	1.56413	7.63287	3.63042	-4.92781	2.87841	3.94334	5.00778	3.41237	6.17405	3.13669	5.65251	7.19776	4.86672	7.27673	5.82635	6.95388	6.92209	4.21852	4.98841	-9.30478	4.79768	3.52512	1.67837	2.65042	248.682
446	-6.52572	-14.397	2.60671	4.53194	5.81692	7.00355	4.42167	5.99474	1.44045	7.13468	3.47296	-5.10812	2.88934	3.43968	4.87914	3.08206	5.83977	2.89679	5.25167	7.00851	4.46935	6.80784	5.50201	6.48201	6.76115	3.70989	4.73311	-9.0758	4.48177	3.10987	1.35551	2.92609	245.743
448	-6.45618	-14.556	2.73039	4.67251	5.65996	7.09842	4.40578	6.0151	1.84576	7.2067	3.44316	-4.99735	3.80377	3.75658	5.03411	3.15458	5.88248	3.00258	5.30432	7.10338	4.4932	6.60916	5.50598	5.98133	6.84907	3.36766	4.97798	-9.16272	4.64022	3.03338	1.68631	3.18686	243.64
450	-6.12736	-14.4511	3.7536	5.23726	5.74936	7.51267	4.61588	6.39309	2.30471	7.45555	4.29054	-4.47383	4.81506	4.21206	5.16723	3.55989	6.16908	3.35922	5.57154	7.40389	4.79917	6.73781	5.78463	5.90285	7.21812	3.39101	5.35846	-9.19153	4.89503	2.99066	2.12888	3.13471	241.631
452	-5.99722	-14.4586	4.61986	5.45532	5.73645	7.77642	4.54833	6.5128	2.29528	7.3577	5.1861	-4.31587	4.72615	4.19666	5.05149	3.82364	6.18746	3.50972	5.61724	7.51317	5.00282	6.73284	6.02156	6.12736	7.50721	3.543	5.67436	-9.08375	4.78824	3.0299	2.05437	2.8491	239.19
454	-5.8651	-14.4179	4.45346	5.23627	5.36591	7.69546	4.19766	6.24408	1.79857	6.85851	4.88559	-4.32581	3.7695	3.93887	4.76887	3.75211	5.86659	3.35574	5.3674	7.22458	4.88311	6.44028	5.95848	6.07967	7.56284	3.47296	5.78264	-8.97	4.22647	3.2261	1.88053	2.59628	236.426
456	-5.71012	-14.0543	3.72777	5.126	4.95414	7.63635	3.96917	6.13083	1.38432	6.55055	3.86685	-4.29749	3.39597	3.95477	4.59452	3.61154	5.56757	3.16997	5.18858	6.88434	4.74652	6.1964	5.88745	5.65847	7.58717	3.46402	5.8199	-8.86172	3.79135	3.35077	1.92821	2.46416	233.647
458	-6.15319	-13.8501	3.14663	5.05497	4.80761	7.74115	3.92745	6.27587	1.01378	6.6633	3.27379	-4.8096	4.14004	4.19766	4.45793	3.57081	5.45084	3.11633	5.24223	6.77804	4.77036	6.0906	5.99871	5.2308	7.58221	3.71287	5.80549	-8.85874	3.69251	2.91715	1.72804	2.48452	231.203
460	-6.95189	-14.3314	2.58684	4.49071	4.6884	7.45604	3.60161	6.16113	-0.133117	6.51777	3.20425	-5.93861	4.899	4.13011	3.91553	3.40442	5.23627	2.87394	5.01722	6.62903	4.58906	5.87205	5.93166	4.9154	7.04626	3.56287	5.60631	-9.15378	3.19183	2.04295	1.18166	2.73138	229.103
462	-7.26332	-15.08	2.04543	3.76701	4.32034	6.93947	2.92957	5.7742	-1.8542	5.85318	3.17047	-6.43382	4.69933	3.83606	3.00755	3.20276	4.80115	2.39809	4.40727	6.23961	4.18077	5.47767	5.64754	4.63476	6.35684	2.93205	5.49306	-9.5432	2.06778	1.33663	1.00235	3.08702	226.925
464	-6.87093	-15.2861	1.92473	3.61005	4.03225	6.74973	2.58088	5.59539	-2.63552	5.41459	3.03884	-5.87155	3.86437	3.76999	2.6231	3.16153	4.5523	2.18054	4.09385	5.88298	3.95874	5.20398	5.4578	4.29998	6.09308	2.57045	5.3972	-9.7091	1.23084	1.43349	1.35203	3.11385	224.233
466	-6.67721	-15.2037	2.24511	3.73224	3.98457	6.65287	2.68519	5.59688	-2.32806	5.46823	2.97427	-5.51393	2.95937	4.02927	2.89828	3.15408	4.57863	2.15173	4.15842	5.77867	3.95228	5.23378	5.41061	4.03374	5.9848	2.54611	5.22633	-9.87351	1.21097	2.69363	1.52638	2.94596	221.408
468	-7.49975	-15.3676	2.57343	3.69151	4.08192	6.6191	2.82625	5.64903	-2.10752	5.58297	2.97974	-5.69423	2.17607	4.33922	3.14961	3.16153	4.65165	2.04841	4.2066	5.86361	3.98854	5.46972	5.52038	3.93987	5.97934	2.54065	5.36392	-10.2604	1.43349	4.01884	1.50998	3.0145	219.186
470	-8.35309	-15.5489	3.15458	3.8291	4.54088	7.06216	3.09795	6.08861	-2.06381	5.81543	3.29812	-5.64108	2.07722	4.58807	3.32544	3.45856	5.00629	2.25008	4.42465	6.20633	4.27961	5.89142	5.93861	4.23094	6.41793	2.714	5.94805	-10.3787	1.65055	4.15345	1.89592	3.23405	217.479
472	-8.0198	-15.4654	3.53654	4.12166	4.99537	7.54545	3.34034	6.48697	-2.00669	6.031	3.97116	-5.44637	2.6832	4.71274	3.38356	3.77099	5.36939	2.56797	4.71423	6.54062	4.59254	6.24756	6.27339	4.6278	6.82374	2.88735	6.45171	-9.98229	1.83086	3.14514	2.28484	3.27031	215.254
474	-6.79344	-15.0795	3.02245	4.40031	5.17617	7.64281	3.41485	6.55154	-1.91977	6.05235	4.64767	-5.29736	3.619	4.83195	3.40988	3.94831	5.43396	2.71897	4.88261	6.64194	4.68642	6.40204	6.30816	4.70032	6.87093	2.95887	6.62704	-9.49254	1.83135	2.56747	2.28137	3.08255	211.999
476	-5.89987	-14.6275	2.21034	4.65214	5.12799	7.50273	3.36766	6.45618	-2.11994	5.78016	4.95017	-5.14785	4.53492	4.87268	3.62247	3.99103	5.35995	2.82824	4.93576	6.59923	4.67449	6.38167	6.19143	4.62184	6.82622	3.20971	6.633	-9.16471	1.4628	3.46253	2.07027	2.89232	208.465
478	-6.27836	-14.7179	1.60784	4.54783	4.68294	7.17094	3.10143	6.20534	-2.73188	5.31673	4.0561	-5.24918	4.71473	4.60396	3.79682	3.62744	5.15431	2.66979	4.71175	6.3623	4.48674	6.11742	5.88944	4.33822	6.62307	3.40094	6.2714	-9.38028	0.895063	4.19269	1.74145	2.81185	205.699
480	-7.23203	-15.307	1.42604	4.18574	4.27018	6.8744	2.90573	6.04987	-3.25988	5.14338	2.64198	-5.53578	4.09335	4.30942	3.69201	3.24845	4.95414	2.3211	4.47283	6.05683	4.27912	5.82536	5.54025	3.89516	6.32952	3.25988	5.68181	-10.033	0.544886	3.78639	1.53532	2.90026	203.941
482	-7.28617	-15.3204	1.85966	4.21405	4.35164	7.08997	3.02146	6.23713	-3.44018	5.25862	2.48899	-5.46724	3.7243	4.39882	3.41386	3.34034	4.97947	2.25107	4.61439	6.05881	4.35213	5.879	5.59539	3.86685	6.50684	3.09994	5.6242	-10.0732	0.509123	3.6637	1.79509	3.08653	202.072
484	-6.18796	-14.5083	2.714	4.68989	4.73907	7.66565	3.38852	6.62853	-3.22362	5.49555	3.35077	-5.12401	4.09832	4.57466	3.39299	3.74019	5.21988	2.5938	5.09024	6.41793	4.6586	6.23266	6.0603	4.40876	7.12524	3.20077	6.1666	-9.13342	0.747541	4.21703	2.09312	3.12428	199.306
486	-5.36988	-13.95	3.16799	4.8846	4.90894	7.67211	3.5574	6.62555	-3.17891	5.53876	3.71138	-5.15332	4.27316	4.57317	3.54846	3.90708	5.23776	2.81135	5.25018	6.52572	4.69089	6.38763	6.12686	4.8394	7.16647	3.46949	6.51777	-8.41071	0.816584	4.50015	2.05388	3.06616	196.257
488	-5.87106	-14.2435	2.85258	4.57863	4.69734	6.9797	3.2117	6.07818	-3.88175	5.12699	3.45608	-5.35349	3.83109	4.70678	3.41982	3.56485	4.84536	2.47459	4.83692	6.10997	4.2056	6.08563	5.58048	4.69933	6.48747	3.54449	6.35187	-8.59251	0.260274	3.92546	1.99924	3.06517	193.729
490	-6.67175	-14.617	2.48005	4.31289	4.45396	6.48101	2.91069	5.62171	-4.44651	4.78576	3.50575	-5.23279	3.64681	5.0957	3.24448	3.08305	4.49767	2.11497	4.4475	5.77966	3.72728	5.75384	5.09322	4.48525	6.06229	3.43621	5.95301	-8.92232	-0.308951	3.07312	2.07225	3.00656	191.539
492	-6.81132	-14.5167	2.30918	4.21455	4.32481	6.48747	3.0448	5.57949	-3.9945	4.95712	3.61502	-5.2015	3.92298	5.35299	3.47793	2.74579	4.42614	2.07673	4.41223	5.75334	3.6483	5.70466	4.9745	4.47581	6.17256	3.60757	5.54919	-8.88258	-0.094374	2.76019	2.04841	2.91318	189.273
494	-6.59029	-14.5977	1.92722	3.76155	4.13408	6.33448	3.14613	5.51989	-3.30607	5.1409	3.37561	-5.8949	3.90112	4.8702	3.8147	2.55505	4.18226	1.90934	4.33972	5.54075	3.58373	5.68032	4.83493	4.47283	6.0002	3.86685	5.31276	-8.89103	0.319382	2.82427	1.64956	3.1357	187.385
496	-6.36329	-14.8808	1.53432	3.11236	3.94334	5.89937	2.99911	5.22484	-3.22709	5.0361	3.1968	-6.50088	3.68009	4.09236	3.97563	2.44478	3.67661	1.49608	4.06702	5.07385	3.30955	5.53081	4.51406	4.42465	5.41955	3.68307	5.21541	-9.02464	0.245372	2.99215	1.30137	3.43571	185.781
498	-6.19044	-14.7914	1.31826	2.88536	3.92795	5.65002	3.06567	5.10166	-3.13222	5.07981	3.17146	-6.31362	3.98606	4.02033	4.22001	2.28832	3.4521	1.27206	3.9647	4.77582	3.18885	5.54472	4.296	4.3874	5.07881	3.41932	5.0197	-9.27945	0.255803	3.15756	1.35501	3.3468	183.839
500	-6.52274	-14.9161	1.09226	2.79297	4.07298	5.51045	3.48439	5.25961	-2.45372	5.44389	3.11931	-6.22123	4.38889	4.3273	4.68592	2.12987	3.53505	1.20103	4.18574	4.71622	3.33736	5.93613	4.26819	4.27216	4.85728	3.79086	4.86473	-9.85662	0.744065	3.24249	1.27504	3.22809	182.054
502	-7.51068	-15.307	1.13696	2.61019	4.22895	5.35051	3.89715	5.37684	-1.78715	5.69324	3.02444	-6.38912	4.01437	4.44402	5.06441	2.09461	3.61254	1.04159	4.41571	4.68244	3.47892	6.38912	4.36256	4.10875	4.69387	4.45594	4.96656	-10.2793	1.2214	2.79397	1.1002	3.36518	180.486
504	-8.22246	-15.2146	1.51098	2.61664	4.19319	5.30531	4.00841	5.36939	-1.69128	5.77718	2.93603	-6.22521	2.79148	4.37548	4.99686	2.0504	3.51518	0.910461	4.3864	4.52499	3.44217	6.42637	4.46041	3.93738	4.80562	4.21057	5.08229	-10.2525	1.42405	1.8537	0.954171	3.40044	178.553
506	-8.07991	-14.8579	1.76132	2.61913	3.82513	5.13444	3.6637	5.19603	-2.05586	5.8651	2.88288	-6.09557	1.88351	4.04368	4.40131	1.84377	3.04331	0.674526	4.02331	4.14203	3.0453	6.00567	4.26223	3.57628	4.749	2.99315	4.9154	-10.0692	1.41511	1.61479	0.784794	3.28024	176.571
508	-7.49429	-14.6752	1.53879	2.40803	3.22014	4.67847	3.05126	4.85082	-2.63105	5.81443	2.95788	-6.50336	2.53916	3.4521	3.63191	1.61777	2.37525	0.21408	3.47495	3.60111	2.3375	5.34107	3.78042	2.95887	4.21653	2.21431	4.58062	-9.88742	1.12702	2.16464	0.453492	3.19928	174.837
510	-7.11183	-14.8346	0.653664	2.01364	2.64744	4.11868	2.38915	4.33326	-3.44117	5.37435	2.94795	-7.15504	3.73721	2.73287	3.04182	1.31875	1.79062	-0.374019	2.84712	2.96732	1.56015	4.74205	3.19729	2.42343	3.5579	2.32806	4.20213	-9.96838	0.419716	2.36829	-0.187755	3.14315	173.43
512	-7.28617	-15.4341	-0.535448	1.59641	2.25008	3.61105	1.88798	3.91752	-4.06454	5.01027	2.50836	-7.52856	4.01884	2.16911	2.88635	1.05401	1.3421	-0.962615	2.29875	2.47359	1.04209	4.39038	2.76218	2.05686	3.06616	2.75671	3.80923	-10.5754	-0.13113	2.09063	-0.612438	3.16004	172.595
514	-8.03868	-16.0833	-0.999868	1.58499	2.26398	3.57678	1.96695	4.08292	-3.52711	5.53628	1.91033	-7.66019	3.61403	2.09212	3.42975	1.2969	1.38531	-1.18017	2.34346	2.45372	1.11659	4.42018	2.82129	1.76777	2.99017	3.15656	3.5882	-11.2524	0.343223	2.04891	-0.650684	3.17146	172.013
516	-8.93623	-16.1832	-0.208616	1.8542	2.59578	3.95874	2.43187	4.50313	-2.25355	6.37372	1.94659	-7.75953	3.09547	2.30124	4.10974	1.65751	1.74195	-0.996888	2.80291	2.72393	1.46329	4.73807	3.14265	1.75238	3.27726	3.19034	3.47992	-11.3616	1.31379	2.34693	-0.59406	3.0458	170.859
518	-8.97795	-15.6204	0.604987	1.83284	2.5625	3.92745	2.42492	4.38194	-1.6287	6.41147	2.46664	-7.90556	3.05424	2.10255	4.07745	1.357	1.57058	-0.927349	2.73784	2.66184	1.36644	4.70777	3.02593	1.76827	3.29564	2.84016	3.18587	-10.8813	1.64409	2.58386	-0.792742	2.84811	168.313
520	-8.3516	-15.083	0.203649	1.5532	2.07424	3.49283	1.89692	3.78986	-1.78665	5.8944	2.48104	-8.15541	3.43174	1.57555	3.48737	0.617405	0.930826	-1.206	2.16415	2.17408	0.832478	4.17382	2.47856	1.60833	3.00954	2.53916	2.8188	-10.5187	1.38581	2.8337	-1.21891	2.90324	165.111
522	-7.91599	-14.8123	-0.642737	1.66098	1.9143	3.49979	1.62721	3.55542	-1.91083	5.71658	2.28534	-7.91748	3.54846	1.42008	3.21319	0.319382	0.701348	-1.29541	1.96646	2.01861	0.575681	3.97265	2.34743	1.79112	3.14365	2.63602	2.86152	-10.2987	1.37289	3.00656	-0.976026	3.21368	162.887
524	-7.34379	-14.3578	-1.09076	2.26249	2.1716	4.01934	1.79162	3.92546	-1.71065	6.08762	2.82427	-7.01447	3.39001	1.90089	3.48588	0.715753	1.01924	-0.855327	2.27938	2.41399	0.786782	4.18524	2.79794	2.1711	3.75857	2.98818	3.33985	-9.66092	1.76082	2.99414	0.170867	3.34034	161.829
526	-6.86695	-14.1352	-1.48217	2.45968	1.98583	4.16885	1.72009	4.04567	-1.66794	6.24706	3.38157	-6.39459	3.01003	2.36283	3.54151	0.97851	0.997384	-0.672539	2.26349	2.54561	0.733634	4.04269	2.91268	1.89642	3.96669	3.02245	3.54201	-9.22134	1.85221	3.14067	0.816584	3.2107	161.253
528	-7.04527	-14.4184	-1.83781	1.95503	1.07785	3.64731	1.00782	3.36915	-2.17656	5.62767	2.84761	-6.58234	2.36829	2.24014	2.95639	0.456472	0.299017	-1.27455	1.55816	2.01066	0.019868	3.33736	2.31614	0.94523	3.42627	2.51283	3.12527	-9.41952	1.3113	3.20623	0.366072	2.94348	160.304
530	-7.44462	-14.6722	-1.43598	1.54724	0.493725	3.25888	0.451505	2.87344	-2.4423	5.16772	1.96199	-7.22359	2.1865	1.97937	2.45025	0.0183781	-0.0958639	-1.78864	1.06941	1.53035	-0.495712	2.8044	1.85917	0.361105	2.88337	2.15123	2.78155	-9.76423	0.959635	2.63651	-0.214577	2.74628	158.628
532	-7.27425	-14.4725	-0.0576178	1.71363	0.944237	3.41833	0.691911	3.24299	-1.73549	5.57005	1.83384	-7.88371	2.48551	1.9153	2.56101	0.317395	0.344217	-1.40568	1.34955	1.81049	-0.203153	3.05076	2.07027	0.863274	2.98321	2.21779	2.91864	-9.74536	1.46131	1.69575	-0.498195	2.69214	156.583
534	-6.63996	-13.9902	1.18365	2.29577	1.72009	3.845	1.10269	3.76602	-0.946224	6.01262	2.49545	-7.96318	2.57591	2.06679	2.84215	0.783801	0.984967	-0.606974	1.85321	2.5327	0.39041	3.53158	2.46465	1.74691	3.55492	2.13434	3.18388	-9.32266	2.12242	1.20898	-0.586112	2.67724	154.595
536	-6.41396	-13.7781	0.979503	2.76119	1.93417	4.15395	1.09225	3.79682	-1.16428	5.85566	3.21716	-7.50224	2.99116	2.23766	2.75224	0.866254	1.28696	-0.178814	1.95056	3.00258	0.64522	3.7089	2.5928	2.11298	3.9349	2.01017	3.30259	-9.11256	2.08368	1.32918	-0.63926	2.7592	152.706
538	-6.38018	-13.6539	0.210603	2.97825	1.84923	4.25329	1.08778	3.64135	-1.61479	5.73397	3.53058	-6.96182	4.03523	2.27888	2.68966	0.805656	1.40369	-0.0496705	1.91281	3.23157	0.717243	3.82662	2.61913	2.34743	3.93937	2.38518	3.3473	-9.19352	1.8393	2.15272	-0.428657	2.90722	150.928
540	-5.98282	-12.9913	0.501176	3.3617	2.22027	4.46737	1.4623	3.86387	-1.31726	6.16511	3.53505	-6.22471	4.45992	2.3668	3.0453	1.01874	1.72903	0.367562	2.18451	3.61105	0.948707	4.15246	2.88536	2.96583	4.17084	2.81632	3.5122	-8.94318	2.05586	3.3468	0.136594	2.94199	149.23
542	-5.80301	-12.1375	1.39177	3.76354	2.73337	4.80264	1.67688	4.21405	-1.0257	6.50833	3.38157	-5.62568	3.47098	2.50489	3.15259	1.31677	2.02109	0.8593	2.37326	3.95974	1.08779	4.39386	3.2266	3.39101	4.6129	2.62608	3.73125	-8.36452	2.28087	3.5122	0.355641	2.97924	147.493
544	-6.33399	-12.0228	1.57803	3.57032	2.61168	4.65115	1.33713	4.05411	-1.32819	6.2108	2.90573	-5.94159	1.67737	2.56101	2.71151	1.35303	1.8537	0.842909	2.02556	3.87877	0.77337	4.15643	3.16203	3.1814	4.5225	1.90139	3.769	-8.18819	2.02209	2.50985	0.105302	3.16699	146.335
546	-7.12425	-12.9571	0.983973	2.89927	2.18799	4.11371	0.869731	3.59168	-1.62472	5.79754	2.28832	-7.0413	0.475347	2.32309	2.37872	1.19706	1.40667	0.426173	1.58797	3.51022	0.371039	3.73274	2.76913	2.84066	3.91652	1.19607	3.59615	-8.70724	1.73797	1.4628	-0.351171	3.24945	145.771
548	-7.44313	-13.8536	0.527998	2.78254	2.29925	4.07795	0.850856	3.66867	-1.34408	6.01709	2.43535	-7.66764	0.539919	2.0196	2.61813	1.31826	1.40965	0.347197	1.71165	3.47098	0.467896	3.76503	2.75969	2.90324	3.76254	1.29143	3.60757	-9.2114	1.97093	1.38879	-0.585616	3.15656	144.803
550	-7.35819	-13.8745	0.379483	3.21468	2.56499	4.39882	0.93927	4.08242	-1.2055	6.36429	3.14067	-7.41879	0.940263	1.96993	2.83321	1.66198	1.68383	0.59704	1.99229	3.70642	0.698864	3.98258	3.03437	2.89381	4.04964	1.88301	3.85394	-9.15974	2.20388	2.16415	-0.403821	3.19978	143.126
552	-7.2673	-13.7563	0.187258	3.18239	2.14924	4.20908	0.442068	3.89963	-2.17656	6.08911	3.36121	-7.2976	1.19557	1.9893	2.32408	1.62025	1.48863	0.469387	1.59095	3.5723	0.38445	3.59416	2.8337	2.4875	3.92695	1.80701	3.89715	-9.2109	1.68482	2.57989	-0.42816	3.47545	141.562
554	-6.89377	-13.6932	0.393887	2.98768	1.58946	3.85493	-0.358621	3.35524	-3.74913	5.57254	3.04282	-7.33683	1.82688	1.96944	1.49508	1.24822	1.14193	0.236432	0.927349	3.30508	-0.111262	2.96732	2.40306	2.33004	3.66817	1.08182	3.7233	-9.40561	0.736118	2.21829	-0.59406	3.74317	140.706
556	-6.16809	-13.2253	1.11113	3.30557	1.53482	3.95228	-0.786285	3.15656	-4.67151	5.24968	2.68569	-7.13219	2.64794	2.06232	1.06345	1.07735	1.18266	0.404815	0.721216	3.42081	-0.243386	2.7443	2.3072	2.40753	3.84301	0.666579	3.58125	-8.95262	0.103315	1.85072	-0.391901	3.80774	139.782
558	-5.87354	-12.7772	1.39525	3.56932	1.5825	4.09434	-1.00285	3.15408	-4.63476	5.06938	2.46316	-7.27326	2.59032	2.10504	0.873208	1.18067	1.25617	0.572205	0.695388	3.57827	-0.236928	2.64247	2.27888	2.22375	3.98507	0.715752	3.54399	-8.20508	0.055631	2.02358	-0.270208	3.66122	138.129
560	-6.00815	-12.6064	0.970562	3.61154	1.53383	4.17928	-1.17868	3.21964	-4.34617	5.10961	2.41945	-7.44313	1.62423	2.111	0.56078	1.36197	1.29193	0.612438	0.63926	3.6036	-0.217557	2.54412	2.30819	2.06778	4.03027	0.864764	3.80774	-7.78834	0.352661	1.94361	-0.199676	3.57926	136.481
562	-5.96941	-12.3873	0.668069	4.06553	1.7489	4.65165	-1.04755	3.54002	-4.19468	5.42303	2.80688	-6.78897	1.12653	2.36233	0.394384	1.67787	1.74542	1.00782	0.825028	4.0397	0.077486	2.74976	2.79496	2.40505	4.56423	0.89705	4.37846	-7.60953	0.652174	1.4479	0.375013	3.50724	135.336
564	-5.40068	-11.6194	1.20153	5.09818	2.35488	5.4424	-0.615915	3.99599	-4.12464	5.6992	3.87629	-5.53181	1.6287	2.99215	0.622869	2.08716	2.65936	1.87109	1.27802	4.89652	0.649194	3.21368	3.44515	3.10441	5.50946	0.7689	4.91093	-7.27127	0.697374	1.91281	1.2214	3.19829	134.014
566	-4.59552	-10.7785	1.74393	5.74489	2.5635	5.75781	-0.472367	3.98606	-4.52598	5.40862	4.66903	-5.1255	2.12391	3.40293	0.811617	2.00321	3.14812	2.34842	1.43051	5.36293	0.93778	3.42429	3.54151	3.22362	5.90533	0.64671	4.93874	-6.82374	0.260274	3.02196	1.51247	3.0155	132.481
568	-4.42465	-10.9086	1.58399	5.50946	2.21779	5.50946	-0.724693	3.5276	-5.26905	4.77831	4.34518	-6.07272	1.73797	3.1809	0.701348	1.33316	3.01749	2.22226	1.2065	5.36094	0.788272	3.31104	3.20027	2.74529	5.68728	0.685453	4.37945	-6.80238	-0.3467	3.02543	0.831485	3.16501	131.87
570	-4.82053	-11.6204	1.41362	5.21541	2.02606	5.44339	-1.03265	3.091	-6.05633	4.07696	3.68754	-6.78053	0.602007	2.72741	0.305474	0.439087	2.95291	2.23915	1.00931	5.43247	0.604987	3.17693	2.96533	2.48998	5.6679	0.382463	3.58025	-7.13964	-1.07288	2.08616	0.0238418	3.33885	131.799
572	-5.21143	-11.7764	1.38581	5.36392	2.01811	5.64754	-1.30683	2.80738	-6.88235	3.43422	3.37859	-6.43184	-0.146528	2.50638	-0.354648	-0.341733	3.0448	2.48551	0.935793	5.55664	0.526508	3.05523	2.88337	2.53369	5.92669	-0.287592	3.015	-7.26779	-1.78417	1.7181	0.153979	3.3915	130.666
574	-5.58645	-11.3517	1.21494	5.64804	2.06878	5.77917	-1.36942	2.83122	-7.33187	3.30508	3.11931	-5.71261	-0.035266	2.68221	-0.824531	-0.451009	3.15358	2.60075	1.02073	5.60681	0.573198	3.05076	2.90424	2.64545	6.17206	-0.633796	3.02941	-7.28667	-1.97391	1.94907	0.978013	3.41982	128.968
576	-5.79059	-11.0244	1.30186	5.67287	2.18799	5.48512	-1.22637	2.88834	-7.48734	3.22858	2.91914	-5.50101	0.227491	2.68122	-0.921885	-0.285109	3.23753	2.55108	1.09275	5.66145	0.666082	3.14514	2.80191	2.78701	6.07371	-0.46591	3.20772	-7.40339	-2.03202	2.15222	1.47074	3.61154	127.804
578	-5.49605	-10.9995	1.84079	5.5929	2.44131	5.13444	-1.05451	2.76466	-7.98057	2.74827	3.18587	-5.91675	0.591079	2.32905	-0.72668	-0.426173	3.37511	2.65489	1.19259	5.8646	0.829995	3.43521	2.64496	3.20027	5.84175	0.0233452	3.1665	-7.23948	-2.55555	2.06083	1.33961	3.9806	126.974
580	-4.598	-10.6871	2.59082	5.98927	3.01152	5.53677	-0.753005	2.87394	-8.6844	2.46167	3.58572	-5.86162	1.14292	2.36481	-0.324349	-0.591079	3.79135	3.21666	1.60287	6.34293	1.22835	3.98556	2.8794	4.09583	6.19094	0.464916	3.04282	-6.56197	-3.07461	2.08368	1.20103	4.221	125.635
582	-3.52263	-9.80049	3.3021	6.74029	3.63042	6.24061	-0.229975	3.23156	-8.73357	2.68569	3.81619	-5.126	1.70469	2.59926	0.0233453	-0.723203	4.37051	3.96371	2.22077	6.98467	1.78764	4.53542	3.31302	4.9596	6.88533	0.839432	3.00904	-5.53975	-2.90424	2.88238	1.2666	4.03126	123.312
584	-3.27677	-9.19153	3.49581	7.12524	3.91006	6.40005	0.34074	3.47992	-7.96417	3.06169	3.92745	-4.7634	2.30869	2.57442	0.164409	-1.02768	4.65512	4.28309	2.7284	7.36664	2.1562	4.83145	3.42826	5.19107	7.08153	1.1151	2.96632	-5.19305	-2.2615	3.7392	1.10616	3.67214	121.241
586	-4.07497	-9.52383	3.18935	6.87192	3.90311	6.04937	0.631312	3.47942	-7.26233	3.33985	3.80675	-5.09073	2.7885	2.46813	0.110269	-1.53879	4.52747	4.03325	2.89778	7.25289	2.18252	4.93179	3.24845	5.06093	6.634	1.16527	2.68221	-5.80847	-1.83533	3.85841	0.674029	3.61999	120.566
588	-5.19256	-10.3434	2.98768	6.29127	3.88225	5.6391	0.671049	3.45012	-7.31001	3.59267	3.76503	-5.56658	2.71748	2.44578	0.067552	-1.87854	4.34667	3.61452	2.86251	6.99063	2.09659	4.95762	3.08553	5.0202	5.94904	1.15136	2.37574	-6.43879	-1.84178	2.90076	0.482798	3.74317	120.711
590	-5.85765	-10.785	2.92063	5.80748	3.85443	5.38776	0.552336	3.42081	-7.92146	3.65823	4.02033	-5.76327	2.48949	2.25554	0.0625848	-1.78913	4.20908	3.31501	2.75274	6.77059	1.87457	4.86722	2.91715	4.84188	5.47965	1.06643	2.25008	-6.58681	-2.18898	1.52836	0.476341	3.73373	120.246
592	-5.49257	-10.4095	3.0304	5.83033	3.98159	5.37137	0.564257	3.36369	-8.26269	3.48091	4.53889	-5.64059	3.08653	1.76926	0.17484	-1.70817	4.21852	3.34432	2.75175	6.72738	1.75138	4.94023	2.83023	4.77334	5.52634	1.35799	2.19544	-6.19342	-2.44727	1.62572	0.363588	3.69847	118.798
594	-4.2518	-9.74288	3.65724	6.33895	4.5379	5.77321	1.05004	3.60211	-7.78784	3.70542	5.39124	-5.45979	4.30942	1.46131	0.606974	-1.7042	4.64469	3.81072	3.23852	7.17044	2.21282	5.54472	3.16352	5.16921	6.10401	2.2163	2.35289	-5.62916	-2.02954	3.28968	0.361602	3.68307	117.525
596	-3.1963	-9.76274	4.09782	6.57936	4.92384	6.12984	1.48565	3.8589	-7.26829	4.14848	5.88993	-5.6689	4.79569	1.29541	0.807643	-1.78218	5.02318	4.04716	3.72827	7.52807	2.73089	6.03795	3.45459	5.30233	6.50634	2.68122	2.44081	-5.64853	-1.44194	4.30942	0.240902	3.60062	116.95
598	-3.23902	-10.1194	3.86884	6.41495	4.76489	6.08514	1.51396	3.8589	-7.10785	4.19517	5.74638	-5.94159	3.95626	1.30634	0.549356	-2.11696	5.04504	3.83705	3.76403	7.4024	2.74281	5.98232	3.41187	4.98593	6.38018	2.13186	2.31018	-6.1065	-1.23978	3.96023	0.132124	3.52661	116.289
600	-3.90261	-9.89934	3.47296	6.37521	4.6278	6.01411	1.59989	3.89963	-6.70801	4.09981	5.41707	-5.71062	2.61217	1.79956	0.455976	-2.26945	5.10961	3.75062	3.7839	7.32243	2.62409	5.95748	3.38505	5.07732	6.20236	1.31975	2.33799	-6.11494	-1.0709	3.64929	0.394384	3.52015	114.825
602	-4.15047	-9.48509	3.32445	6.46512	4.90844	6.106	1.97937	4.07845	-5.98083	4.24534	5.13941	-5.39819	1.86414	2.24958	0.822047	-2.0653	5.34604	3.87679	4.15742	7.53899	2.7895	6.2714	3.54101	5.67188	6.20782	1.26014	2.51333	-5.73844	-0.568728	3.77893	0.714759	3.55889	113.154
604	-3.89119	-9.59337	3.56187	6.49343	5.4275	6.35733	2.53369	4.44849	-5.08229	4.77781	5.1409	-5.58595	1.91331	2.24411	1.45535	-1.75287	5.65946	4.11272	4.78029	7.91053	3.22312	6.78599	3.86337	6.07173	6.3315	1.92622	2.63055	-5.63115	0.192225	3.66867	0.748038	3.66867	112.176
606	-3.77893	-10.033	3.7233	6.32505	5.64953	6.51975	2.83221	4.72466	-4.43955	5.30779	5.20696	-6.18498	2.06828	1.82589	1.91182	-1.70668	5.79953	4.2816	5.14438	8.06997	3.45955	7.06414	4.0849	5.83281	6.23862	2.32011	2.45273	-5.95202	0.772377	3.56883	0.311931	3.60906	111.352
608	-4.06454	-10.2237	3.68853	6.1666	5.62121	6.54558	2.93503	4.81904	-3.98556	5.65549	4.67549	-6.51181	2.14229	1.70618	2.21034	-1.7941	5.85069	4.36008	5.28047	8.11865	3.52065	7.06414	4.19269	5.40515	6.12388	2.01414	2.26895	-6.21825	1.28051	3.69052	-0.0576178	3.45955	110.363
610	-4.73062	-10.3409	3.62297	6.11444	5.6689	6.54558	3.02543	4.93278	-3.67363	5.86808	3.65277	-6.70403	2.59727	2.12342	2.31961	-1.57356	6.01063	4.33574	5.40962	8.32031	3.67761	7.10885	4.3869	5.43346	6.106	1.48614	2.45273	-6.30021	1.70122	3.86884	0.00198676	3.61651	109.852
612	-5.24273	-10.4661	3.20127	6.01759	5.55317	6.46015	2.81284	4.85579	-3.90361	5.70863	3.17395	-6.67969	3.04232	2.23368	1.85867	-1.45783	6.00219	4.08192	5.27402	8.28107	3.62198	7.04179	4.38889	5.44985	6.02404	1.11361	2.61267	-6.42786	1.58499	4.32432	0.293056	3.87977	109.37
614	-4.88609	-10.2445	2.7135	6.00666	5.34852	6.4378	2.56002	4.7485	-4.09434	5.47717	3.61055	-6.11494	3.02692	1.95056	1.32571	-1.64658	5.95649	3.91453	5.16822	8.04514	3.41783	6.81728	4.23342	5.18958	6.02057	0.958145	2.5322	-6.39707	1.33713	4.55479	0.561774	3.91901	108.345
616	-4.39733	-10.028	2.96682	6.1358	5.29637	6.47902	2.59628	4.84983	-3.93341	5.59241	3.81271	-5.65102	2.32905	1.87208	1.14491	-1.77324	6.04143	3.94384	5.27054	7.96566	3.41783	6.67622	4.25528	5.21292	6.05186	1.07636	2.42541	-6.34988	1.43449	4.13507	0.77337	3.88771	107.424
618	-5.13544	-10.3692	3.71883	6.1661	5.27551	6.44922	2.62012	4.94371	-3.93788	5.7886	3.20623	-5.59141	0.864267	1.94212	1.00384	-1.79162	5.95202	3.87083	5.27998	7.8544	3.44664	6.60966	4.33326	5.28743	6.02851	1.30484	2.37574	-6.97225	1.57654	3.40988	0.975033	4.08491	107.518
620	-6.61761	-11.2663	3.76056	5.63612	4.97897	6.24359	2.34495	4.7947	-4.14004	5.76327	2.63304	-6.41197	-0.248353	1.54575	0.700851	-1.84377	5.50747	3.38306	5.11855	7.39694	3.18736	6.40303	4.11322	4.8697	5.68181	1.17868	2.25057	-8.10226	1.53532	2.4279	0.378986	4.41571	108.25
622	-6.95189	-11.6467	2.9857	4.92583	4.66357	5.95003	2.1557	4.59502	-4.0849	5.75682	2.83867	-7.74662	0.219544	0.993907	0.674029	-1.83533	5.07385	2.8342	5.09024	6.86099	2.86202	6.18001	3.82413	4.52995	5.09371	1.10666	2.22226	-8.51899	1.63664	1.68631	-0.639757	4.40578	107.792
624	-5.78314	-10.6553	2.58634	5.24471	4.91639	6.09656	2.61466	4.88361	-3.16352	6.31313	3.96768	-7.72526	1.81744	1.22686	1.44392	-1.47472	5.22633	3.09298	5.5934	6.93997	3.03586	6.46214	3.99748	4.98742	5.13593	1.69973	2.67824	-7.55986	2.48303	1.91331	-0.534952	3.9647	105.7
626	-4.76837	-9.64353	2.82029	6.07868	5.31028	6.39111	3.19978	5.30978	-1.94609	7.03881	5.22633	-7.06166	3.16054	1.6585	2.15371	-1.12106	5.60582	3.68953	6.13481	7.39892	3.41783	6.91414	4.30296	5.58843	5.64257	2.1706	3.11385	-6.28581	3.56932	2.80539	-0.119706	3.68406	103.648
628	-4.65413	-9.68079	3.09696	6.10799	5.1409	6.20286	3.1208	5.19454	-1.57108	7.06762	5.51691	-7.00653	3.76403	1.55618	1.93963	-1.28597	5.48412	3.7238	6.13332	7.51764	3.41088	6.83318	4.16388	5.54274	5.70516	2.06431	2.93056	-5.79506	3.83407	3.67165	-0.276168	3.69847	102.694
630	-4.50363	-9.80347	3.10441	5.74291	4.75546	6.00765	2.79049	4.89652	-1.85817	6.68218	5.05298	-6.72191	3.84251	1.44045	1.50849	-1.50353	5.13047	3.5122	5.9093	7.34925	3.20226	6.48946	3.90957	5.05149	5.55217	1.92175	2.4731	-5.76377	3.50525	3.82364	-0.496705	3.64731	102.304
632	-4.15693	-9.64254	2.90573	5.75135	4.83543	6.15418	2.82278	4.93228	-2.12193	6.55949	4.79172	-6.30816	3.64284	1.53333	1.56363	-1.46975	5.09322	3.46899	5.96195	7.27028	3.19481	6.45965	3.93242	4.92185	5.61128	1.96844	2.09113	-5.80202	3.44465	3.50724	-0.574688	3.5122	102.266
634	-3.844	-9.38028	2.77807	6.14325	5.19305	6.38664	3.03636	5.21292	-2.15968	6.76066	4.68443	-6.34193	3.69648	1.64906	1.70916	-1.38233	5.34554	3.68009	6.25253	7.48187	3.38455	6.66529	4.19766	5.39571	5.86013	2.10603	1.99725	-5.80549	3.69052	3.83705	-0.491738	3.42478	102.382
636	-3.37909	-8.9849	2.65737	6.58135	5.25763	6.63151	3.0761	5.4429	-2.04047	7.09842	4.36554	-6.59277	3.85145	1.66098	1.50253	-1.27554	5.61774	4.08093	6.41644	7.84099	3.57578	6.72092	4.53144	5.69075	6.11742	2.07027	2.25306	-5.63363	3.95278	4.32084	-0.396868	3.4531	101.775
638	-2.79893	-8.38935	2.90374	7.17193	5.31872	7.10785	3.22362	5.84722	-1.7032	7.5688	4.67598	-6.20882	3.82463	1.58846	1.49757	-0.924865	6.10054	4.673	6.67969	8.35309	3.88672	6.86695	4.93775	5.78215	6.634	2.22176	2.74032	-5.21541	4.3273	4.0104	0.0456969	3.45707	100.675
640	-2.54214	-8.00937	3.79284	7.72327	5.62717	7.75605	3.5281	6.30071	-1.41909	7.93139	5.70764	-5.5025	3.68704	1.62472	1.90785	-0.4222	6.66579	5.19753	7.07457	8.83838	4.21603	7.16746	5.29091	5.91626	7.34826	2.67575	3.10789	-4.94868	4.58012	3.4372	0.552833	3.36121	100.337
642	-3.04679	-8.47429	4.63376	7.51466	5.72155	7.87179	3.52015	6.25799	-1.52687	7.93685	6.12835	-5.59439	3.17146	1.89344	2.10653	-0.363589	6.74178	5.13246	7.07308	8.91735	4.17878	7.20372	5.20845	5.92669	7.40935	2.62658	3.0756	-5.10663	4.43906	3.39001	0.608961	3.28968	100.849
644	-3.83606	-9.1518	4.8692	6.88682	5.49306	7.41979	3.19084	5.88348	-2.00172	7.62294	5.68579	-6.1666	2.72791	2.21133	1.81745	-0.761449	6.43382	4.73907	6.73483	8.66999	3.91354	6.95437	4.86275	5.75036	6.83864	2.00123	2.96831	-5.30978	4.06206	3.89864	0.566244	3.34531	101.389
646	-4.27018	-9.14186	4.85977	6.69559	5.32865	7.16795	2.96781	5.74589	-2.42889	7.39147	5.41558	-6.32058	3.12279	2.50886	1.46876	-1.00036	6.29028	4.66257	6.52125	8.58853	3.82761	6.75867	4.79619	5.5323	6.53764	1.66098	3.05623	-5.25663	3.82811	4.45495	0.787775	3.65178	101.77
648	-4.11967	-8.56519	4.79817	7.06017	5.64406	7.45952	3.19829	6.07322	-2.28484	7.63138	5.75632	-5.7439	3.83407	2.87245	1.7643	-0.801682	6.55651	5.1111	6.67671	8.88656	4.01835	6.99063	5.0803	5.83579	6.90122	2.09312	3.20673	-5.14885	4.0109	4.48177	1.17471	4.0551	101.707
650	-3.57081	-8.21402	4.27961	7.3264	6.0449	7.76847	3.34084	6.23018	-2.28832	7.51714	5.93315	-5.19405	3.49532	2.81831	2.19494	-0.711779	6.78698	5.44588	6.75271	9.11554	4.05759	7.22706	5.18362	6.48797	7.27524	2.53568	3.2415	-5.26458	3.8147	3.95924	1.20699	4.16984	100.796
652	-3.33339	-8.39531	3.56833	7.06712	5.92669	7.70191	2.9693	6.06726	-3.0905	6.84559	5.3828	-5.49207	2.20935	2.24262	1.91331	-0.81112	6.56346	5.18858	6.51379	9.00229	3.82066	7.0105	5.06242	6.54111	7.13368	2.21034	3.33389	-5.44538	3.0145	3.79185	0.836949	3.96222	99.8626
654	-3.45459	-8.44151	3.35077	6.92805	5.79953	7.73023	2.57691	6.15021	-3.93838	6.58035	4.71324	-5.71261	1.52538	2.03401	1.27504	-0.642737	6.42141	4.9606	6.40154	8.94864	3.72976	6.83367	5.23726	6.39806	6.95487	1.77175	3.67661	-5.23478	2.54015	3.94583	0.795722	3.83804	99.6177
656	-3.44465	-7.87129	3.74913	7.45753	6.01858	8.09332	2.48055	6.43134	-4.39882	6.78003	4.54088	-5.01424	2.01215	2.55654	0.812113	-0.258783	6.74625	5.25514	6.50982	9.23127	3.91801	6.90371	5.62221	6.66827	7.22309	1.8239	3.9503	-4.64022	2.48253	3.85294	1.29938	3.84897	99.5229
658	-3.71983	-7.60953	4.00692	7.764	5.80549	8.10275	2.23219	6.29971	-4.85033	6.75966	4.50114	-4.7033	2.77311	2.90523	0.430644	-0.186264	6.79294	5.38876	6.31014	9.196	3.7988	6.60916	5.56807	6.44873	7.32243	1.67191	3.70741	-4.53393	2.25802	3.52015	1.48465	3.91702	99.4513
660	-4.47929	-8.34713	3.86635	7.30604	5.04007	7.58419	1.66198	5.74589	-5.33064	6.3767	4.09434	-5.36541	3.10838	2.6226	0.179311	-0.507136	6.27736	4.91788	5.76427	8.70874	3.27925	6.02007	5.07732	5.47071	6.82374	0.876188	3.26534	-5.28196	1.80304	2.87791	1.14838	4.21753	100.016
662	-4.6432	-8.98192	4.17779	7.14958	4.81258	7.51267	1.52985	5.62718	-5.47965	6.15964	4.13209	-5.70218	3.02146	2.52177	0.401338	-0.569224	6.16858	4.7639	5.64059	8.71966	3.20176	6.04788	5.0505	4.8702	6.69509	0.488261	3.33438	-5.7439	1.60187	2.75969	1.22637	4.4922	100.652
664	-3.7998	-8.52644	4.824	7.70489	5.21988	8.01086	1.80602	6.01759	-5.65797	6.22322	4.98643	-5.30779	2.03699	2.73536	0.582139	-0.389417	6.61711	5.23925	5.96891	9.18508	3.55889	6.50038	5.4424	4.94073	7.16647	0.861287	3.71089	-5.36193	1.48962	3.59664	1.60635	4.42316	100.09
666	-3.14663	-7.84397	4.78874	8.0958	5.34107	8.21203	1.71463	6.2262	-6.49889	6.2421	5.60582	-5.06292	0.250836	2.67128	0.030299	-0.42369	6.86695	5.45084	6.0901	9.33806	3.68257	6.47157	5.60929	5.0664	7.37458	0.870724	3.83059	-4.94172	1.00732	4.30743	1.53432	4.12315	99.0868
668	-3.47694	-7.74264	3.97215	8.01335	5.04206	8.00341	1.32223	6.06378	-7.57029	5.95152	5.28445	-5.2611	-0.579158	2.61118	-0.707309	-0.628829	6.76662	5.25067	5.9848	9.13888	3.58174	6.10103	5.47965	5.13097	7.22756	0.257293	3.89367	-4.85778	0.366072	4.06702	1.38183	3.9344	99.0778
670	-4.36455	-8.11319	2.82427	7.56085	4.58757	7.64777	0.935793	5.65747	-8.38687	5.38478	4.13805	-5.74589	0.244379	2.81582	-1.18812	-0.935793	6.43631	4.90745	5.79904	8.71072	3.35971	5.66989	5.14686	5.06192	6.8903	-0.205636	3.91503	-5.20994	-0.195702	3.23405	1.26113	4.19567	99.9128
672	-4.75595	-8.3829	2.29627	7.16646	4.37995	7.48088	0.791748	5.39422	-8.67397	5.08676	3.54747	-5.99424	1.7633	2.91467	-1.4027	-1.20501	6.32157	4.72466	5.75433	8.46833	3.30061	5.41906	4.95315	4.89702	6.70999	-0.0114242	3.86238	-5.69075	-0.408292	2.71449	1.19954	4.53194	100.879
674	-4.50412	-8.08686	2.93851	7.32789	4.67996	7.80573	1.10914	5.54075	-8.43108	5.17269	4.41521	-5.52634	3.29266	2.87394	-1.13845	-1.33961	6.63002	4.97848	6.02504	8.70278	3.62049	5.73844	5.10712	4.9144	7.00504	0.516574	3.9205	-5.64059	-0.3015	2.80341	1.43101	4.45843	101.5
676	-4.45098	-7.61052	3.88622	7.72874	5.13941	8.18918	1.5532	5.72155	-8.24481	5.08179	5.36392	-5.04255	4.00593	2.81036	-0.788768	-1.55518	6.96828	5.25961	6.24806	9.03855	3.98407	6.28928	5.24173	5.29736	7.43071	0.868738	3.85642	-5.22832	-0.350674	3.43273	1.51346	4.17531	101.596
678	-4.60396	-7.22855	4.42465	8.14746	5.54373	8.3824	1.89394	5.7747	-8.08984	4.8995	5.25316	-4.72963	3.47694	2.81135	-0.631312	-1.74989	7.25637	5.45134	6.45568	9.30329	4.32183	6.67721	5.39621	5.94507	7.75208	1.11858	3.58671	-4.68443	-0.30299	4.37051	1.7042	3.94533	101.43
680	-4.52995	-7.01944	4.55429	8.38687	5.76377	8.46187	2.12342	5.84026	-7.8554	4.97947	4.46091	-4.51257	2.53965	2.81582	-0.50813	-1.88947	7.47393	5.56707	6.68863	9.43393	4.48426	6.80784	5.52535	6.26644	7.95027	1.22984	3.13818	-4.24931	-0.0685449	4.60992	1.91381	3.86039	101.625
682	-4.47283	-7.57873	4.20809	8.02378	5.36044	8.10872	1.81049	5.52585	-8.33422	4.60545	3.56336	-4.91242	1.8542	2.46118	-0.776847	-2.43137	7.19031	5.20746	6.43233	9.12497	4.09236	6.43382	5.12848	5.69026	7.68453	0.814597	2.48998	-4.49022	-0.478327	3.73721	1.44094	3.84947	102.758
684	-4.53989	-8.50558	3.63588	7.46697	4.70777	7.48734	1.17272	4.85331	-9.3167	3.80228	3.14762	-5.59042	1.61827	1.9903	-1.38779	-3.15756	6.65337	4.66704	5.8805	8.64863	3.45806	5.84175	4.41571	4.86126	7.10189	0.0705322	2.07822	-5.20249	-1.30634	2.6842	0.724693	3.99301	104.703
686	-4.20411	-8.85477	3.30657	7.33634	4.55678	7.14759	0.951191	4.52002	-9.48509	3.60658	3.52909	-5.95301	1.82539	1.92275	-1.60784	-3.37462	6.48896	4.59651	5.69671	8.59052	3.26782	5.71261	4.04418	4.73708	6.74228	-0.341733	2.14676	-5.61029	-1.39872	2.21779	0.502666	4.29402	106.353
688	-3.24647	-8.60641	3.18289	7.68205	4.94967	7.21117	1.29491	4.674	-8.6382	4.00494	4.37051	-5.74986	2.27441	2.02755	-1.22537	-3.19133	6.81678	4.97351	5.9848	8.95709	3.57777	6.08911	4.13557	5.26508	6.79344	-0.0904003	2.28037	-5.4583	-0.761946	2.15471	0.897547	4.37647	106.772
690	-2.42194	-8.19614	3.03537	8.21998	5.35299	7.45803	1.66198	4.88758	-7.74364	4.37498	5.00629	-5.04504	2.51333	1.75883	-0.829001	-3.11683	7.24047	5.31226	6.32207	9.35296	3.85841	6.41495	4.35015	5.80549	7.11878	0.289082	2.2014	-5.31276	-0.216564	2.28236	1.29938	4.24882	106.538
692	-2.20835	-7.79827	2.90672	8.68787	5.35299	7.55141	1.5373	4.80562	-7.73271	4.27018	5.36988	-4.48128	2.24908	1.47273	-0.964105	-3.36419	7.33237	5.48214	6.30965	9.55363	3.7998	6.33548	4.31339	5.9098	7.45157	0.352661	1.9898	-5.37336	-0.314414	2.67625	1.38978	4.16289	106.597
694	-2.70506	-7.55787	2.89629	8.79367	4.9909	7.34925	1.07537	4.4028	-8.40425	3.79831	5.45134	-4.54237	1.71214	1.36942	-1.42455	-3.83854	7.00156	5.54472	5.92967	9.47068	3.51767	5.97139	3.995	5.67188	7.39346	0.296036	1.73599	-5.42104	-0.806153	2.75721	1.36296	4.20262	107.193
696	-3.98755	-7.62492	3.12825	8.41469	4.54883	7.02888	0.691414	3.94781	-8.86867	3.57479	5.01523	-4.95315	1.12653	1.36495	-1.75387	-4.24137	6.50833	5.42949	5.44141	9.20544	3.13421	5.53826	3.65873	5.4126	6.99659	-0.0710289	1.66496	-5.53975	-1.04457	2.54561	1.22239	4.34816	108.027
698	-5.13991	-7.54694	3.92993	8.18868	4.61539	7.04875	0.660121	3.8286	-8.63622	3.78092	4.41869	-5.02765	1.36693	1.76132	-1.69675	-4.39932	6.35634	5.43247	5.30332	9.13541	2.90523	5.43545	3.60111	5.50797	6.94444	-0.678996	1.78715	-5.42949	-0.823041	2.82973	0.915428	4.372	108.313
700	-5.07881	-6.83367	5.13395	8.54731	5.27849	7.40538	1.08729	4.13408	-7.74612	4.16487	4.34568	-4.65363	2.76615	2.3072	-1.10318	-4.19319	6.62506	5.8348	5.65698	9.50148	3.09348	5.92222	3.82662	5.95252	7.35273	-0.46293	1.87804	-4.68393	-0.233452	3.63588	0.841419	4.33773	108.136
702	-3.94036	-6.01163	5.68728	9.01371	5.79754	7.5986	1.5229	4.3119	-6.79543	4.5225	4.79718	-4.21007	3.18885	2.53469	-0.461439	-3.89268	6.89179	6.24309	5.98629	9.89685	3.43025	6.51429	4.01338	6.21627	7.68304	0.588596	1.884	-3.65625	0.415742	4.30097	1.33365	4.45644	108
704	-2.84264	-5.81145	5.18958	9.16521	5.76576	7.60655	1.5527	4.12812	-6.37571	4.76191	5.07385	-4.02977	1.51048	2.34395	-0.354151	-3.95974	6.97623	6.26296	6.01311	9.9053	3.43025	6.58482	3.96768	6.01014	7.70738	1.12007	1.78268	-3.1958	0.712772	4.447	1.72108	4.64569	108.231
706	-2.38965	-6.09358	4.30048	9.03209	5.42551	7.56284	1.5075	3.97414	-6.1661	4.8548	5.12103	-4.29849	-0.13262	2.05388	-0.43412	-4.2056	6.94195	5.9555	5.88894	9.65297	3.20971	6.36429	3.80278	5.57154	7.47492	0.752012	1.60287	-3.49581	0.829498	4.33972	1.63565	4.57664	108.908
708	-2.33998	-6.25898	3.68605	8.88109	5.23975	7.46896	1.75933	4.04467	-5.60979	4.99239	5.16027	-4.35561	-0.0799695	2.08517	-0.330806	-4.37448	6.92308	5.72751	5.83678	9.53029	3.12825	6.38167	3.76155	5.21044	7.3428	0.396867	1.42008	-3.78042	1.18613	3.6786	1.60287	4.29501	109.73
710	-2.71002	-6.36975	3.27627	8.83192	5.40167	7.50174	2.08964	4.12315	-4.89453	5.16772	5.05596	-4.21454	0.878672	2.18799	-0.178317	-4.58012	6.99858	5.82685	5.90831	9.67632	3.21865	6.68019	3.89715	5.26011	7.57178	0.601013	1.20948	-3.86288	1.73499	2.82427	1.59095	4.15097	110.973
712	-3.36121	-6.86944	2.71449	8.53539	5.54522	7.44561	2.1403	3.94334	-4.79122	5.16822	5.04057	-4.78576	1.71165	2.02358	-0.248353	-4.91142	6.85801	5.79854	5.86261	9.64503	3.12726	6.81231	3.88076	5.52585	7.58469	0.81708	1.01427	-4.25428	1.93914	2.57989	1.2661	4.23888	112.415
714	-3.543	-6.97623	2.60621	8.37147	5.77122	7.3726	2.25405	3.91155	-4.8543	5.34902	5.69423	-5.16673	2.47806	1.90487	-0.183781	-4.96606	6.7845	5.7141	6.00517	9.48807	3.00407	6.84857	3.8599	5.84026	7.32442	0.863771	1.1305	-4.37895	1.98285	2.32706	1.19259	4.38889	113.106
716	-3.05126	-6.22968	3.22213	8.7445	6.27488	7.56482	2.79148	4.27614	-4.17878	5.88348	6.72241	-4.6889	3.09795	1.87705	0.415246	-4.62383	7.05272	5.94805	6.3921	9.64254	3.22809	7.24196	4.11371	6.47008	7.33683	1.13348	1.33862	-3.8291	2.44975	2.47012	1.69526	4.31985	113.21
718	-2.78801	-5.83629	3.80427	8.99633	6.27637	7.56631	2.86798	4.34766	-3.76701	5.93315	7.19279	-4.44849	2.71847	1.42157	0.709295	-4.53542	6.90073	5.99325	6.25302	9.62665	3.19282	7.34081	4.10775	6.79294	7.45604	1.33117	1.06841	-3.53555	2.63701	3.73274	1.78119	4.03772	113.234
720	-3.43919	-6.18696	4.12861	8.88805	5.78612	7.34826	2.45273	4.12315	-4.00494	5.66592	6.81579	-4.69784	1.75039	0.794729	0.383953	-4.63277	6.35783	5.7141	5.84424	9.21736	2.78254	6.95437	3.76552	6.27538	7.4779	1.24027	0.680486	-3.96768	2.43187	4.97947	1.09325	3.96321	114.001
722	-4.13259	-6.58681	4.45197	8.71072	5.58446	7.16349	2.39859	4.15941	-3.96917	5.97835	6.02404	-4.96556	1.51197	0.809133	0.104805	-4.44849	6.11097	5.47121	5.88497	8.95113	2.62857	6.81827	3.55293	5.68132	7.43071	1.08878	0.767907	-4.53641	2.67078	5.66095	0.60449	4.15792	115.676
724	-3.66519	-6.48151	4.80811	8.69383	5.71807	6.97176	2.62012	4.27812	-3.80178	6.46561	5.41856	-4.91192	2.1413	1.19805	0.201166	-4.32531	6.15666	5.44141	6.11593	8.94169	2.62906	6.97672	3.48588	5.59936	7.38949	1.01775	1.00036	-4.46687	3.02047	5.90831	0.664095	4.18524	116.644
726	-2.85655	-6.17703	4.91838	9.02762	5.99722	7.07606	2.83817	4.46637	-3.61949	6.76115	5.25067	-4.46091	2.6678	1.25964	0.562767	-4.31935	6.28581	5.54075	6.29475	9.05097	2.713	7.21663	3.62992	5.94457	7.68056	1.08679	1.09623	-4.03076	3.30011	5.52783	0.759959	4.09087	116.981
728	-3.14812	-6.45767	4.46588	9.12398	6.00567	7.2057	2.74628	4.46886	-3.74516	6.72638	4.80761	-4.30842	1.97887	1.11858	0.368555	-4.3422	6.12736	5.44439	6.14425	8.99384	2.60274	7.19825	3.64135	6.14574	7.86185	0.977019	1.06245	-4.32134	3.26633	3.83059	0.671049	4.22398	117.986
730	-3.75162	-6.69459	4.06106	9.04202	5.85119	7.07855	2.56548	4.40776	-4.00543	6.63847	4.49121	-4.21157	0.852843	1.16825	-0.269711	-4.15047	5.8954	5.36939	5.87851	8.93275	2.34445	7.02888	3.48141	6.09905	7.6279	0.885129	1.15583	-4.86523	2.99811	2.03053	0.81112	4.36604	118.928
732	-3.50922	-6.12934	4.38293	9.31174	5.99474	7.18882	2.8789	4.83195	-3.71436	7.10239	5.21938	-3.79334	1.07537	1.3262	-0.290076	-3.50823	6.1507	5.73595	6.23763	9.28243	2.60671	7.19974	3.68257	6.24706	7.61449	1.09573	1.67092	-4.51108	3.33637	2.42144	1.31627	4.14153	119.199
734	-3.18686	-5.7747	4.60098	9.39618	6.00368	7.30654	3.16948	5.22584	-3.42528	7.52608	6.08067	-4.01537	2.15322	1.06394	-0.0372528	-3.14961	6.39409	5.94904	6.71198	9.47813	2.89778	7.29114	3.93093	6.26495	7.61002	0.881155	2.02109	-3.86784	3.76801	3.9344	1.44889	3.89765	119.76
736	-3.43621	-6.04043	4.30644	9.18011	5.77072	7.23749	3.20921	5.43743	-3.23455	7.68354	6.39111	-4.5379	3.21815	0.842412	0.0700353	-3.04878	6.34243	5.79904	6.87291	9.3023	2.95639	7.18832	4.04567	6.15368	7.47542	0.608464	2.13683	-3.70443	3.90708	4.69387	1.2964	4.11719	120.848
738	-3.82712	-6.45618	3.97613	8.93821	5.70863	7.23948	3.25193	5.75731	-3.03785	7.98901	6.49591	-4.6894	4.21802	1.00384	0.180801	-2.64694	6.34392	5.61525	7.00702	9.1364	3.07957	7.16498	4.21057	6.31114	7.47989	1.02371	2.35538	-4.05411	4.05461	4.4927	1.18166	4.52697	121.742
740	-3.45757	-6.61661	3.86486	8.66999	5.88944	7.35372	3.21716	5.96444	-3.09348	8.11468	6.49144	-4.84089	4.55181	1.1305	0.290076	-2.39263	6.43631	5.47171	7.08153	9.05544	3.16054	7.18484	4.3566	6.57539	7.52757	1.50651	2.36183	-4.41819	4.0397	4.38392	0.885626	4.673	121.88
742	-2.30571	-6.27637	3.93689	8.68241	6.11891	7.59413	3.09	5.9858	-3.44912	7.78089	6.30518	-4.98643	3.9955	1.37786	0.277658	-2.48055	6.5739	5.56856	7.10885	9.18657	3.2415	7.27971	4.48773	6.77258	7.69645	1.55965	2.23766	-4.26471	3.68158	4.88708	0.683963	4.66059	121.375
744	-1.83781	-5.81642	4.07547	8.90791	6.20733	7.76301	2.94248	5.92569	-4.32779	7.31895	6.44177	-4.90099	3.242	1.67191	-0.17633	-2.61764	6.66231	5.82288	7.12921	9.43542	3.26137	7.31945	4.59701	6.91464	7.86384	1.37041	2.14775	-3.82463	2.99215	5.05447	0.820557	4.65612	121.143
746	-2.91069	-5.94457	4.16189	8.971	6.19044	7.65373	2.84563	5.89391	-5.0351	7.11034	6.80586	-4.93079	3.02345	1.64459	-0.639757	-2.70754	6.60817	5.87106	7.17392	9.48558	3.14166	7.25687	4.60446	6.95537	7.72675	1.20203	2.04295	-3.86784	2.51681	4.75546	0.93778	4.53293	121.882
748	-4.1604	-6.53565	4.25478	8.81155	6.01063	7.38303	2.82526	5.9406	-5.00431	7.22806	6.55353	-5.16226	3.27875	1.63019	-0.623862	-2.68271	6.46363	5.65996	7.32889	9.28442	3.04381	7.11034	4.46091	6.64691	7.37508	1.17322	2.05239	-4.5826	2.5476	4.20759	1.06941	4.37697	123.047
750	-4.28458	-6.93599	4.41323	8.61983	5.70317	7.30256	2.83668	6.02553	-5.02567	7.34975	5.97586	-5.03361	3.45955	1.71612	-0.453492	-2.56499	6.35435	5.43048	7.50025	9.08126	3.06169	6.91911	4.39584	6.15468	7.15752	1.18017	2.2764	-5.19007	2.55406	3.77148	1.2661	4.35015	123.783
752	-3.94533	-7.16249	4.46936	8.45144	5.43545	7.5529	2.8953	6.11395	-5.42949	7.31101	5.76973	-4.7192	3.59565	1.57952	-0.322362	-2.5625	6.36081	5.3366	7.57327	9.04898	3.18835	6.85751	4.6427	5.94209	7.27226	1.24673	2.53568	-5.34554	2.41001	4.46488	1.26113	4.44353	124.129
754	-3.55442	-6.94493	4.55032	8.5781	5.49853	8.00689	3.15855	6.36379	-5.58297	7.3567	6.05087	-4.5225	3.67314	1.5522	-0.055631	-2.58336	6.58929	5.63165	7.78089	9.29832	3.52313	7.09891	5.08626	6.08911	7.69347	1.34856	2.62012	-5.02666	2.35339	5.60383	1.37985	4.56969	124.126
756	-2.93056	-5.98431	4.9149	9.05593	5.98778	8.41965	3.57578	6.76264	-5.36839	7.4471	6.87788	-4.22249	3.11583	1.71761	0.288586	-2.48154	7.04775	6.23961	8.13454	9.78609	3.96371	7.56135	5.46922	6.43631	8.14249	1.3724	2.61813	-4.1455	2.46018	5.78711	1.57704	4.49866	123.521
758	-2.6077	-5.21739	5.11706	9.37482	6.46661	8.48124	3.94732	6.94891	-5.08328	7.37458	7.90407	-4.0402	2.56648	1.78566	0.660121	-2.3072	7.39346	6.63549	8.35607	10.0965	4.17233	7.89464	5.50548	6.70304	8.15888	1.44045	2.71549	-3.23355	2.54413	5.4116	1.50502	4.21852	122.828
760	-2.82576	-5.42253	4.70827	9.14882	6.59476	8.18223	4.12414	6.83864	-5.01474	7.22706	8.2309	-4.40876	2.72791	1.87308	0.913938	-2.32706	7.31001	6.5123	8.32279	10.0315	4.15345	8.00242	5.3222	6.85453	7.7347	1.64111	2.77112	-2.99066	2.47906	5.2611	1.27157	4.08838	122.903
762	-2.88238	-5.96245	3.9652	8.89649	6.51975	8.1718	4.09981	6.74327	-5.19206	7.19627	7.55936	-4.99884	2.95192	1.97738	0.94523	-2.4572	7.11977	6.23713	8.27213	9.91474	4.1609	8.10077	5.34703	6.935	7.65224	1.92424	2.79943	-3.39001	2.42045	5.23676	1.12603	4.24931	123.677
764	-2.15371	-5.94457	3.87232	9.47565	6.65486	8.92878	4.22895	7.03434	-5.2914	7.49578	6.89427	-4.76986	3.02543	2.42839	1.15931	-2.19792	7.45505	6.5575	8.57463	10.2182	4.37796	8.32578	5.79705	7.1009	8.44498	2.24362	3.02891	-3.7243	2.53121	5.1414	1.49558	4.39088	124.258
766	-1.36246	-5.5934	4.67747	10.2361	6.92954	9.60231	4.30991	7.23849	-5.48959	7.63834	6.71496	-3.90808	3.13073	2.96434	1.27852	-1.9143	7.86334	7.13815	8.76139	10.6543	4.48376	8.4276	6.14921	7.43121	9.26356	2.22723	3.29316	-3.6185	2.5183	5.01076	2.10504	4.49022	124.112
768	-1.44343	-5.4578	5.62718	10.1556	7.11133	9.32912	4.06305	6.88732	-5.75384	7.27673	6.37819	-3.71387	3.19034	2.67376	0.939767	-2.09113	7.71681	7.20968	8.39978	10.6812	4.22001	8.37098	5.92122	7.78933	9.12597	1.8095	3.33836	-3.45707	2.29428	4.3869	2.24113	4.77582	123.651
770	-2.10305	-5.55366	6.13481	9.71456	7.16299	8.70724	3.76751	6.34988	-5.93563	6.81827	5.87751	-3.96172	2.86748	2.0956	0.498195	-2.41796	7.36366	6.98268	7.96914	10.4899	3.89467	8.33521	5.428	7.915	8.4728	1.38978	3.22759	-3.42478	2.03898	3.6642	2.21978	4.90348	123.63
772	-2.91218	-6.02802	5.71311	9.31571	6.66181	8.06948	3.19233	5.6694	-6.83367	6.15021	5.29091	-4.2508	2.07474	1.98732	-0.186264	-2.85109	6.85553	6.57588	7.463	10.0796	3.35823	7.91103	4.76639	7.36465	7.85987	1.02272	2.81235	-3.67761	1.27405	3.27031	2.25306	4.72218	124.282
774	-3.53456	-6.80238	4.92235	8.93772	5.98033	7.57227	2.5481	5.07285	-8.14994	5.44041	4.82847	-4.91738	1.47522	1.81248	-0.881652	-3.24299	6.34243	6.04043	6.89973	9.51986	2.72046	7.24147	4.14997	6.49144	7.51217	0.609458	2.31663	-4.35064	0.291566	2.84016	1.67092	4.75049	125.125
776	-3.45359	-6.93699	4.89602	9.28889	6.07371	7.85887	2.60323	5.08875	-8.49366	5.20349	5.46674	-4.88808	1.64608	1.46528	-0.68595	-3.21269	6.45171	6.14723	6.85751	9.70662	2.78453	7.28369	4.26869	6.3767	8.08189	0.4222	2.44876	-4.51505	0.0367563	3.1516	1.31577	4.92533	125.237
778	-2.90871	-6.47604	5.2308	10.0742	6.633	8.32925	3.01053	5.26458	-8.10971	5.05795	6.58433	-4.15544	1.72605	1.48416	0.000496737	-3.10441	6.82771	6.76513	7.03136	10.3255	3.2117	7.76996	4.66853	6.87043	8.91537	0.448028	2.93106	-3.98358	0.137587	3.90609	1.99527	5.00282	124.692
780	-2.67625	-6.50436	5.15133	9.94802	6.65536	7.84248	2.83768	4.77731	-8.12064	4.51406	6.69907	-4.24782	1.1151	1.84327	0.13262	-3.42776	6.58929	6.78102	6.62357	10.1581	2.92261	7.65622	4.21306	7.01894	8.54681	0.449022	2.84115	-3.95974	-0.16888	3.63588	2.28037	5.20498	124.495
782	-2.88834	-7.01596	4.69883	9.09766	6.01212	6.87838	2.1552	3.87828	-8.68887	3.81023	6.21825	-4.87417	0.622372	2.11497	-0.265738	-4.0556	5.83629	6.09507	5.78463	9.36439	2.10702	7.0398	3.13371	6.4974	7.56681	0.678996	2.25554	-4.46985	-0.72668	3.22014	1.68333	5.40266	124.743
784	-3.26534	-7.38303	4.34021	8.5637	5.427	6.43134	1.72059	3.27031	-9.20494	3.37213	6.08067	-5.28892	0.629326	1.99179	-0.46889	-4.45495	5.30382	5.53479	5.28942	8.85874	1.58896	6.73234	2.46614	5.80351	7.08103	0.963608	1.99427	-4.76738	-1.1156	3.8286	1.1752	5.36342	125.228
786	-3.7243	-7.63883	4.40627	8.31087	5.3222	6.33498	1.70469	2.86053	-9.40263	2.98967	6.031	-5.66642	0.850856	1.6426	-0.265738	-4.76539	5.07633	5.33164	5.1106	8.75741	1.43051	6.7398	2.24411	5.7285	6.82573	0.565747	2.10206	-4.97252	-1.47025	4.63227	0.951687	5.22584	125.94
788	-4.04467	-7.88371	4.40627	8.03024	5.31326	6.11643	1.61082	2.36134	-9.6485	2.30571	5.67685	-5.96295	1.51992	1.22388	-0.270208	-5.32667	4.86523	5.18411	4.79768	8.64714	1.30335	6.58929	1.98732	5.9853	6.60717	-0.00894082	1.90586	-5.2467	-2.08716	4.80264	0.713269	5.04752	126.039
790	-3.96371	-8.01881	3.93639	7.89215	5.18113	5.89341	1.35154	2.00172	-9.96242	1.65204	5.50797	-5.9247	2.19097	1.04258	-0.718733	-5.8194	4.71373	5.06441	4.53194	8.46932	1.11858	6.38862	1.73002	5.91079	6.59873	0.170866	1.45137	-5.26855	-2.72344	4.10328	0.528494	4.78526	125.229
792	-3.85592	-7.98603	3.58423	8.04216	5.13345	5.93364	1.22835	1.96894	-10.182	1.39425	5.89341	-5.69572	2.10007	1.18961	-1.12752	-5.99722	4.73112	5.06441	4.54932	8.37942	1.07884	6.33846	1.72853	5.89639	6.77506	0.578165	1.2219	-5.02318	-3.07262	3.38207	0.542402	4.59701	124.327
794	-3.48091	-7.09345	3.85394	8.50757	5.2914	6.23812	1.41909	2.19842	-10.102	1.69128	6.56446	-5.16127	2.31117	1.46429	-0.993411	-6.02802	4.89354	5.28594	4.80165	8.57065	1.30236	6.44475	1.98583	6.30021	6.97623	0.676513	1.17173	-4.32829	-2.91566	3.82413	0.852346	4.57466	123.107
796	-2.45074	-5.54075	4.49965	9.0609	5.72503	6.75321	1.86463	2.63353	-9.63112	2.40902	7.24047	-4.222	3.58721	1.54078	-0.302494	-5.88596	5.18908	5.65896	5.25614	9.03755	1.70867	6.8138	2.47111	6.78649	7.25687	0.963608	1.24276	-3.35177	-2.3211	4.85082	1.20799	4.51704	121.73
798	-1.41511	-4.74354	5.16524	9.47118	6.33001	7.44959	2.48949	3.32147	-8.86867	3.3766	7.76847	-3.87877	4.55926	1.41412	0.679493	-5.37286	5.75085	6.10848	5.95003	9.52631	2.22623	7.45008	3.18239	7.15653	7.76649	1.63664	1.60535	-2.74628	-1.48962	5.28296	1.19756	4.3879	121.474
800	-1.05749	-4.96258	5.52585	9.58691	6.61363	7.87874	2.96334	3.86437	-8.00788	4.25428	7.71483	-4.45743	4.08143	1.5681	1.26511	-5.01474	6.21726	6.39806	6.51727	9.72897	2.61913	7.89215	3.62943	7.12077	8.18719	1.97093	1.86364	-2.68668	-0.654161	4.96507	1.17719	4.39982	122.464
802	-1.45584	-5.72056	5.4275	9.17663	6.39061	7.62095	2.90871	3.94533	-7.56433	4.66158	7.20123	-5.29985	3.016	1.77771	0.824531	-5.10514	6.1517	6.23167	6.55651	9.61125	2.65241	7.77493	3.55194	6.70403	7.9751	1.67737	1.77771	-3.09596	-0.165403	4.75595	1.37538	4.62184	123.863
804	-2.15918	-6.62307	5.25067	8.594	6.36379	7.15057	2.68569	4.02381	-7.38154	5.01871	6.9042	-5.8646	2.33601	1.88599	-0.0576179	-5.02715	5.98629	5.91973	6.52224	9.44982	2.61217	7.59264	3.46104	6.58532	7.30852	1.16279	1.67837	-3.70443	0.180801	5.0361	1.45584	4.84089	124.754
806	-2.93354	-7.32988	5.37584	8.31087	6.57092	6.89924	2.66482	4.2816	-7.05818	5.66095	6.91215	-6.09656	2.0653	1.81248	-0.51558	-4.68989	5.93762	5.70317	6.6489	9.29683	2.6087	7.5991	3.56535	6.71893	6.76314	0.735124	1.67191	-4.24733	0.573198	4.82549	1.18365	4.90348	124.791
808	-3.17792	-7.42276	5.6078	8.35508	6.45419	7.02093	2.76963	4.54783	-6.61661	6.2868	7.15206	-6.19094	2.61366	1.48962	-0.371536	-4.32481	5.95301	5.64456	6.79543	9.23773	2.53816	7.58966	3.75211	6.79642	6.70999	0.775854	1.75983	-4.45793	0.938276	4.54734	0.804663	4.88261	124.514
810	-2.42641	-6.96431	5.39323	8.7291	6.15815	7.37011	2.87294	4.84586	-6.05186	6.77953	7.39644	-6.00715	3.63439	1.29143	0.0933807	-4.07845	6.09656	5.81443	6.91017	9.39071	2.53866	7.54893	3.97066	6.89129	7.00851	1.34607	1.99179	-4.24137	1.49757	5.29736	0.624359	4.77036	124.252
812	-1.58101	-6.6191	4.64966	9.00875	5.86659	7.48336	2.84066	4.9601	-5.48313	7.00305	6.94543	-5.6833	4.19418	1.16676	0.445048	-4.20014	5.97537	5.8502	6.76513	9.44982	2.47657	7.33485	3.97513	6.71297	7.17938	1.90983	2.06381	-3.96818	2.07176	5.97586	0.622868	4.61241	123.948
814	-1.12255	-6.483	4.16736	8.92778	5.72205	7.3567	2.78999	4.8851	-5.02169	7.03782	6.00219	-5.57651	4.23938	1.10418	0.542402	-4.36554	5.71559	5.8189	6.55452	9.31621	2.2312	7.08997	3.78589	6.3469	7.09891	2.09063	1.93715	-3.81172	2.38866	4.74652	0.753502	4.69486	124.047
816	-1.19309	-6.49293	4.17183	8.63671	5.58297	7.11332	2.60075	4.74155	-5.08626	7.06464	5.8199	-5.50946	3.59962	0.983973	0.182291	-4.24633	5.5025	5.90483	6.32803	9.23425	1.8537	6.87242	3.53009	6.16411	6.99311	1.68085	1.92622	-3.83556	2.43684	2.71002	0.864267	4.97649	124.77
818	-1.60337	-6.56297	4.02977	8.57214	5.09669	7.03335	2.15421	4.57217	-5.53379	7.04179	6.68416	-5.30432	2.94447	0.703831	-0.480314	-4.07646	5.25266	5.97437	5.99076	9.25511	1.41064	6.54856	3.41485	5.97139	7.24941	0.983477	1.89543	-3.87828	2.40703	2.7746	0.705818	5.08974	125.453
820	-1.8239	-6.36429	3.64383	9.09915	4.81357	7.50969	2.04593	4.6437	-5.42601	7.06365	7.66913	-4.97897	2.92857	0.679493	-0.51409	-3.97066	5.22633	6.18199	5.96593	9.44535	1.28994	6.46611	3.63837	5.804	7.99398	0.663102	1.7032	-3.65824	2.52277	4.3869	0.516077	4.90497	125.934
822	-2.11	-6.05583	3.33438	9.73592	5.0361	7.86732	2.43435	4.84586	-4.68343	7.25786	8.24581	-4.6884	2.65241	1.10616	0.192225	-3.93391	5.43445	6.43532	6.21776	9.68973	1.47323	6.71248	3.82811	5.97437	8.31087	0.700851	1.58648	-3.39399	2.90126	4.77582	0.752509	4.73062	126.468
824	-2.50439	-6.09259	3.39846	9.80496	5.25465	7.51019	2.80639	4.90447	-3.92993	7.61996	8.41916	-4.91639	2.05934	1.67092	0.706315	-3.97861	5.51492	6.44426	6.3171	9.6937	1.49409	6.89675	3.65525	6.18199	7.7188	0.690421	1.68184	-3.47147	3.41535	4.17133	1.14739	4.86821	126.957
826	-2.35687	-6.32455	4.09037	9.47118	5.30084	7.00603	2.88983	4.86374	-3.38654	7.89662	8.25922	-5.43992	1.98086	1.81794	0.797709	-3.94285	5.35895	6.34094	6.25004	9.5427	1.3267	6.93003	3.37263	6.13232	7.13219	0.778337	1.85569	-3.68456	3.83258	4.43161	1.16428	5.09669	127.264
828	-1.93169	-6.40353	5.14189	9.39121	5.42601	6.92656	2.8943	4.89354	-2.81433	8.08984	7.94182	-5.65698	2.13683	1.48714	0.987947	-3.70344	5.17269	6.33299	6.256	9.49353	1.20352	6.99411	3.35922	6.14921	7.14213	0.901024	2.01613	-3.78986	4.25726	5.1856	0.854333	5.25713	127.849
830	-1.4022	-5.98828	5.92073	9.79354	5.62121	7.17044	2.90821	5.05547	-2.61863	8.17428	7.89911	-5.2765	1.93665	1.18961	1.21593	-3.42826	5.1717	6.61562	6.39657	9.63559	1.25418	7.06017	3.59416	6.44823	7.51913	0.847876	2.03649	-3.44366	4.37399	5.28544	0.835458	5.37932	128.789
832	-0.522037	-5.25266	6.3474	10.4532	5.69075	7.48386	2.80341	5.26508	-3.16401	7.9448	8.17577	-4.4172	1.42157	1.31428	1.08331	-3.31302	5.33313	7.05918	6.3931	9.91424	1.37438	7.05918	3.89169	6.74675	8.01235	0.845889	2.0052	-2.5178	3.96371	4.80811	1.39227	5.29538	129.412
834	-0.440578	-5.1707	6.4378	10.7964	5.46873	7.63287	2.39958	5.28246	-4.19815	7.56135	7.98355	-4.09484	0.796219	1.78168	0.321369	-3.4372	5.31375	7.25041	6.03497	10.103	1.21196	6.80437	3.96719	6.85851	8.24233	0.758966	2.05636	-2.05884	3.29018	4.26819	1.93268	5.12898	130.073
836	-1.65155	-5.68777	6.21031	10.5162	5.19454	7.50373	1.84427	5.04454	-5.29587	7.11828	7.50323	-4.71771	0.788768	2.01364	-0.585616	-3.76701	5.0957	7.2524	5.53727	10.1194	0.836452	6.36578	3.74963	6.86993	8.11915	0.376999	2.04295	-2.45422	2.55456	4.13557	1.86016	5.13742	131.57
838	-2.56598	-5.81394	6.10898	10.324	5.16574	7.45157	1.54078	4.79271	-6.10401	6.58433	7.72278	-5.23627	1.78864	1.70072	-0.929336	-4.01835	5.04504	7.38551	5.31127	10.1686	0.683466	6.0762	3.60409	6.76215	8.08686	-0.00496699	2.03898	-2.83221	1.91083	4.2965	1.44194	5.31077	133.593
840	-2.06431	-5.29389	6.64045	10.774	5.48015	7.76897	1.61777	4.78377	-6.21974	6.20733	8.34465	-4.98841	2.6539	1.35998	-0.711779	-4.02182	5.34554	7.73768	5.51095	10.4517	0.842412	6.14971	3.78539	6.83914	8.45492	-0.16739	2.19891	-2.62956	1.64658	4.63327	1.22736	5.41459	135.093
842	-0.823041	-4.56174	7.37359	11.3626	5.81642	8.06799	1.72754	4.84139	-6.01312	5.84622	8.41469	-4.14401	2.1562	1.57456	-0.506143	-4.02282	5.6386	8.14994	5.71162	10.7949	1.03166	6.39657	3.99649	7.20272	8.88854	-0.147025	2.39809	-2.03848	1.57605	4.81953	1.74393	5.38627	135.649
844	-0.0869234	-4.34319	7.44959	11.5613	5.80102	8.04663	1.67439	4.7485	-6.21428	5.36839	8.14199	-3.25789	0.957648	2.10156	-0.620385	-4.13408	5.73645	8.42164	5.58744	11.004	1.07537	6.45717	3.92944	7.56433	8.98739	-0.0188748	2.55158	-1.72506	1.31726	4.73162	2.6236	5.54969	136.321
846	-0.104805	-4.67151	6.76314	11.6095	5.70317	8.08189	1.71612	4.74503	-6.35535	5.14537	8.13107	-3.17494	0.672539	2.25256	-0.544389	-4.08292	5.94805	8.54184	5.52485	11.225	1.14391	6.4671	3.96421	7.66466	9.12448	0.296037	2.58883	-1.94212	1.1911	4.9755	2.7289	5.72602	137.534
848	-0.325839	-4.84536	5.76178	11.8062	5.78513	8.25574	1.8239	4.83592	-6.38217	5.12898	8.17825	-3.90162	1.59045	1.80304	-0.190238	-3.89169	6.28879	8.57959	5.66045	11.3999	1.28398	6.50684	4.10924	7.41482	9.3778	0.504653	2.44429	-2.17805	1.1007	5.10861	1.96099	5.48164	138.365
850	-0.277162	-4.79768	5.13295	11.9587	5.90732	8.33273	1.83235	4.84089	-6.72688	5.08378	8.03669	-4.37796	2.75324	1.29044	-0.0680487	-3.83655	6.46114	8.47677	5.66691	11.4232	1.39823	6.49442	4.10775	7.40339	9.37084	0.341237	2.31614	-1.99775	0.752012	4.54684	1.4022	5.12501	138.832
852	0.140568	-4.60794	5.18709	11.7928	5.83033	8.12312	1.66297	4.63128	-7.28965	4.7793	8.17329	-4.2965	3.47942	1.25617	-0.295043	-4.10179	6.33647	8.29697	5.43346	11.3428	1.35203	6.39111	3.91801	7.63039	9.0758	0.208119	2.22921	-1.60237	0.264744	3.97762	1.40915	5.07236	138.985
854	0.709295	-4.34816	5.56161	11.4078	5.43892	7.82212	1.36296	4.32581	-7.91947	4.39336	8.79715	-4.21604	3.75211	1.62075	-0.667572	-4.53293	6.03646	8.2319	5.13742	11.1471	1.08828	6.13978	3.69549	7.34429	8.78324	0.306964	2.18401	-1.43995	-0.212093	4.40627	1.58846	5.25514	139.173
856	0.843406	-4.46439	5.67337	11.088	4.94172	7.6895	1.07288	4.18375	-8.41618	4.24882	8.7296	-4.0705	3.09447	1.85668	-1.04904	-4.89255	5.76178	8.09878	4.93377	10.8903	0.751018	5.83778	3.58472	6.72539	8.68589	0.198682	2.30819	-1.76678	-0.502666	5.29289	1.89344	5.43594	140.722
858	0.34968	-5.07782	5.54621	10.7422	4.49717	7.36862	0.659625	3.91801	-8.76983	4.05808	7.66416	-4.16537	1.3267	1.30485	-1.54326	-5.22782	5.36442	7.59661	4.61241	10.4219	0.294546	5.50995	3.22958	6.17653	8.39134	-0.318885	2.13385	-2.44776	-0.804166	4.70976	1.5974	5.44687	143.127
860	-0.392894	-5.97437	5.52237	9.98576	3.90609	6.68416	0.0928838	3.33786	-9.19253	3.64383	7.05272	-4.86871	-0.301997	0.270208	-2.26498	-5.69423	4.6591	6.7994	4.02927	9.64751	-0.281135	5.0207	2.52823	5.51144	7.68503	-0.784298	1.44541	-3.10292	-1.25915	3.11633	0.750522	5.35399	144.775
862	-1.22488	-6.7085	5.39174	9.19799	3.54201	6.23514	-0.184774	2.93106	-9.46969	3.38604	7.2812	-5.53181	-0.483294	-0.264744	-2.61416	-6.07769	4.0854	6.08464	3.76999	9.01669	-0.590583	4.7798	2.08269	5.01126	7.06663	-0.709295	0.865758	-3.64383	-1.4474	2.59678	0.378489	5.18461	145.646
864	-1.89195	-6.88732	5.03461	8.99881	3.93341	6.34789	0.248849	3.0756	-9.21687	3.62843	7.8554	-5.76129	0.558793	-0.0163913	-2.1706	-5.88546	4.221	5.93215	4.18921	8.9854	-0.374516	5.21044	2.14875	5.04752	6.92954	-0.535945	0.829995	-4.05759	-1.14838	3.1963	0.290076	4.95911	146.932
866	-2.1855	-6.77605	4.64718	9.23773	4.52995	6.62059	0.971059	3.39448	-8.91884	3.96669	8.11716	-5.70267	1.75287	0.568231	-1.48664	-5.37783	4.69039	6.23316	4.7043	9.37631	0.0526505	5.84672	2.39114	5.31276	7.20968	-0.646214	1.04556	-4.09981	-0.906984	3.76403	0.247856	5.03113	148.955
868	-1.99179	-6.44078	4.6129	9.77616	5.03957	6.99709	1.46578	3.58323	-9.00825	3.95825	8.07544	-5.18511	2.66979	1.05898	-0.857314	-4.99835	5.12948	6.67671	4.97798	9.93411	0.51111	6.39757	2.75075	5.99672	7.86732	-0.142555	1.40121	-3.56684	-1.09076	4.28806	0.702341	5.29538	150.532
870	-1.58747	-6.01411	4.85182	10.3215	5.61674	7.22259	1.81248	3.62396	-9.1657	3.70095	8.02477	-4.65065	3.08255	1.29491	-0.238915	-4.83592	5.50151	7.05868	5.15183	10.3419	0.860294	6.91265	2.93255	7.00702	8.27809	0.976523	1.76479	-2.96185	-1.45634	4.72516	1.26908	5.43197	151.114
872	-1.37736	-5.60731	5.04404	10.7095	6.04093	7.17094	2.24958	3.4675	-8.95659	3.46502	8.10772	-4.39634	3.0304	1.66545	0.273685	-5.05	5.72652	7.39644	5.32518	10.5624	1.03364	7.37409	2.72046	7.47889	8.24978	1.62373	1.78019	-2.71002	-1.48565	4.60893	1.54674	5.34654	151.274
874	-1.20203	-5.06143	5.30779	11.1977	6.35783	7.39048	2.68519	3.47147	-8.64118	3.5584	8.33472	-4.16239	2.67973	1.99676	0.398358	-5.26657	5.98878	7.8549	5.55267	10.8709	1.27455	7.72526	2.75522	7.39992	8.5786	1.30484	1.76529	-2.60125	-1.14242	4.27614	1.67936	5.12699	151.556
876	-1.13696	-4.91242	5.55764	11.3557	6.49939	7.71632	2.66184	3.5723	-8.76983	3.78937	8.24382	-4.26273	2.05537	1.80503	-0.109772	-5.23974	6.20286	8.12064	5.61625	11.081	1.4325	7.76003	3.0001	7.28965	8.97497	0.480314	1.95404	-2.55505	-0.957151	4.07497	1.72754	5.0962	152.464
878	-0.996888	-4.89155	5.96444	11.2077	6.47406	7.71979	2.43733	3.44465	-9.15428	3.77546	8.42114	-4.46091	1.77821	1.5974	-0.606974	-5.31375	6.31511	8.25028	5.39025	11.2052	1.43101	7.72526	2.94894	7.50621	8.97845	0.0913938	1.91083	-2.25802	-1.04656	4.23044	1.84725	5.1717	153.414
880	-0.504653	-4.3124	6.67274	11.4267	6.54111	7.59463	2.55058	3.26882	-9.1816	3.66668	9.06636	-4.23292	2.22474	1.65353	-0.465413	-5.42154	6.45965	8.58605	5.2621	11.4461	1.49359	7.89662	2.81533	7.89315	8.86718	0.267227	1.55965	-1.6287	-1.14938	5.01424	1.96596	5.1568	153.624
882	-0.21259	-4.04169	7.07805	11.7123	6.67373	7.5688	2.73486	3.1963	-9.02116	3.56237	9.43343	-4.1013	2.86798	1.73897	-0.156959	-5.3977	6.56545	8.78622	5.29935	11.5871	1.56909	8.11219	2.84861	7.99696	8.88556	0.587106	1.43349	-1.41114	-1.21395	5.34356	1.89692	5.20895	153.864
884	-0.461439	-4.43161	6.97623	11.5861	6.59426	7.48684	2.63105	2.99811	-9.19402	3.32594	9.51936	-4.52002	3.29713	1.5974	-0.206629	-5.5785	6.39906	8.64118	5.11159	11.4694	1.42107	8.02527	2.7741	7.67758	8.86718	0.81261	1.40965	-1.66794	-1.45088	4.9452	1.65155	5.31971	154.492
886	-0.90152	-4.7639	6.76165	11.3428	6.56644	7.30505	2.6236	2.77807	-9.22829	3.30955	9.35793	-4.74354	3.63986	1.31279	-0.0407296	-5.82685	6.21527	8.48025	4.91391	11.3701	1.24623	7.97262	2.61019	7.4327	8.60939	1.13597	1.16378	-1.885	-1.54277	5.46624	1.62572	5.28296	154.957
888	-0.97851	-5.00729	6.41545	11.4312	7.06414	7.38204	3.10093	2.99364	-8.67744	3.87728	8.53886	-4.36256	4.19964	1.31031	0.774364	-5.47071	6.41743	8.47975	5.15183	11.5037	1.43896	8.40078	2.76268	7.85689	8.59102	1.69178	1.26064	-2.09312	-1.056	6.4527	2.06629	5.1861	155.61
890	-0.555317	-5.31624	6.00666	11.7014	7.65423	7.76897	3.56535	3.41932	-8.1266	4.40478	7.81218	-4.03623	4.69138	1.50303	1.52687	-4.81158	6.73582	8.65459	5.54423	11.6631	1.70966	8.83092	3.09596	8.49913	9.03805	1.96447	1.73847	-2.25157	-0.587602	6.18498	2.33054	5.20051	156.234
892	-0.018378	-5.24024	6.14176	12.0044	7.99348	8.27064	3.71635	3.7094	-7.88321	4.47084	8.37793	-3.76254	4.50512	1.69029	1.76827	-4.47134	6.96878	9.02216	5.7896	11.9443	1.83831	9.03805	3.43621	9.04699	9.58194	2.09163	2.22027	-2.03351	-0.561277	5.276	2.25306	5.13544	156.048
894	-0.116229	-5.07037	6.60469	12.0461	7.98653	8.47081	3.61601	3.7849	-7.98404	4.38442	9.29683	-3.48936	3.18587	1.93467	1.53333	-4.2513	7.04974	9.19253	5.72403	12.0888	1.86861	8.98441	3.69499	9.46472	9.68526	2.33154	2.54413	-1.99725	-0.697374	4.87765	1.99179	5.07236	155.797
896	-0.733634	-5.21292	6.73632	11.4709	7.46797	8.06252	3.27428	3.66271	-8.27014	4.40478	9.33111	-3.73622	1.33415	2.37425	1.06643	-4.12365	6.68863	8.80212	5.32717	11.7108	1.6287	8.51949	3.5574	9.20892	9.18806	2.05189	2.44429	-2.50489	-0.761946	4.92136	1.69079	5.20547	156.071
898	-1.06742	-5.17915	6.95984	11.0954	7.03881	7.79082	3.15408	3.76354	-8.22594	4.67598	9.25213	-3.81768	0.77188	2.96533	0.799696	-4.1162	6.41992	8.4584	5.22137	11.3785	1.41213	8.24432	3.42131	8.49565	8.8955	1.31279	2.3663	-2.88735	-0.604987	5.09123	1.91331	5.24968	156.628
900	-1.02321	-5.18113	7.28518	11.1962	6.94791	7.80573	3.26932	3.98805	-8.03818	4.97301	9.67234	-3.56734	2.0196	3.01699	0.589093	-4.15146	6.50187	8.41816	5.51194	11.3428	1.42256	8.30442	3.52412	8.02775	8.85874	0.928342	2.59926	-2.95192	-0.372033	5.50747	2.40157	5.20547	157.378
902	-0.934799	-5.65847	7.161	11.1341	6.84957	7.7188	3.317	4.07298	-7.77195	5.08328	9.60131	-3.72678	3.26981	2.31862	0.357131	-4.24137	6.57638	8.27064	5.7434	11.3264	1.52836	8.35707	3.63737	7.9299	8.63423	1.10318	2.68867	-3.19084	-0.0357629	5.72056	2.37872	5.26557	158.127
904	-0.68595	-6.26991	6.81976	11.0865	6.79543	7.83354	3.50078	4.24633	-7.02788	5.36839	8.65211	-4.12365	3.2718	1.89294	0.601013	-4.22398	6.65685	8.21451	5.92172	11.4078	1.76678	8.43306	3.78937	7.9905	8.60592	1.42554	2.58386	-3.5882	0.457465	5.24819	1.93914	5.37634	158.684
906	-0.332793	-6.60022	6.55005	11.2275	6.91166	8.14547	3.83457	4.54237	-6.28283	5.78463	7.69496	-4.49071	2.52376	2.21183	1.23481	-4.04964	6.84808	8.40326	6.23167	11.6229	2.03997	8.62082	3.99401	8.19365	8.79566	1.53283	2.62161	-3.61502	0.870725	4.73758	1.68681	5.32617	159.146
908	-0.887116	-6.81678	6.21279	11.3482	7.14759	8.30889	4.09981	4.87516	-6.19938	6.05484	6.92954	-5.04901	2.0206	2.68469	1.58399	-3.81768	7.10934	8.56072	6.58731	11.8772	2.25057	8.78821	4.21703	8.58456	8.90444	1.37289	2.72691	-3.54648	1.08878	4.22349	1.71711	5.20051	160.181
910	-2.24163	-6.94891	5.61376	11.3328	7.12524	8.24134	3.98159	4.97003	-6.74029	6.02553	6.65138	-5.51393	2.5183	2.60025	1.18266	-3.90559	7.16845	8.5488	6.63598	11.9815	2.20239	8.63075	4.26471	8.80857	8.93474	1.07984	2.53171	-3.73175	0.961621	4.00146	1.85072	5.22236	161.213
912	-3.01749	-6.43631	4.98245	11.3904	6.66032	8.23637	3.61602	4.7793	-7.05173	5.88944	7.26481	-5.06391	3.7089	1.97788	0.631312	-4.1604	6.99758	8.56221	6.40899	11.9686	1.93069	8.24183	4.14401	8.45194	9.09915	0.944237	2.28534	-3.67463	0.906487	4.97152	2.02308	5.16524	160.412
914	-3.41237	-5.63314	4.81953	11.7804	6.50336	8.72165	3.76602	5.00282	-6.15815	6.30716	7.90358	-4.05361	4.45743	1.75983	1.01626	-3.83059	7.15901	8.84434	6.55403	12.132	2.09014	8.23388	4.4018	8.13156	9.58343	1.26064	2.61962	-3.56634	1.59045	5.84523	2.10355	5.17865	158.997
916	-3.4829	-5.20994	5.01772	12.2314	6.73781	9.31223	4.21504	5.50499	-4.77284	7.01249	8.03868	-3.58721	4.21554	2.22772	1.90089	-3.14663	7.62691	9.15726	6.95686	12.44	2.64893	8.46734	4.92632	8.12858	10.0424	1.78367	3.29763	-3.6791	2.49843	5.45631	2.02705	5.41111	158.464
918	-2.37624	-5.15779	5.29538	12.2304	6.53813	9.30876	4.10676	5.53479	-4.5225	7.11431	8.04216	-3.95825	3.72678	2.67227	1.9908	-2.96136	7.68006	9.18657	6.90818	12.441	2.72989	8.3372	5.0202	7.76748	9.9505	1.9292	3.48041	-3.43174	2.7443	5.01474	1.8999	5.50201	157.751
920	-0.804663	-5.21938	5.98083	12.2488	6.38117	9.20296	3.82761	5.50101	-5.0654	7.08749	8.09679	-4.0397	3.71337	3.1213	1.63267	-3.0761	7.64281	9.2566	6.79145	12.4604	2.58336	8.2011	4.92632	7.68403	9.81887	1.76281	3.28968	-2.63552	2.6534	5.04057	2.30521	5.55317	157.011
922	-0.383953	-5.53081	6.72738	12.4872	6.89228	9.40661	4.03076	5.79854	-5.0207	7.48436	7.97113	-3.73026	3.44266	3.37213	1.60883	-3.07014	7.9448	9.42747	7.01845	12.745	2.82774	8.54433	5.1116	8.46138	10.0637	1.55866	3.17941	-2.27044	2.88039	4.63525	2.90324	5.67436	157.104
924	-1.25666	-6.31164	6.75569	12.1196	7.23352	9.27299	4.16587	5.76774	-4.74304	7.60059	7.60406	-4.47979	2.43386	2.73784	1.56015	-3.31054	8.01235	9.19998	7.05868	12.6665	2.92659	8.72115	5.05596	8.80609	9.88394	1.12007	2.79297	-2.87791	2.97676	4.18723	2.50538	5.6833	157.331
926	-1.91182	-6.7547	6.5123	11.454	6.99808	8.94368	3.92497	5.30531	-5.11309	6.96182	7.68652	-5.55764	1.86066	1.95702	1.36842	-3.79483	7.78536	8.78473	6.81877	12.282	2.66035	8.49267	4.67847	8.20756	9.46323	0.854333	2.30918	-3.44167	2.50538	4.92483	1.58896	5.48313	156.714
928	-1.8696	-6.68466	6.47704	11.2752	6.62208	8.92778	3.7243	4.96755	-5.68181	6.26445	8.28803	-5.66045	2.3976	1.58946	1.36942	-4.04716	7.68403	8.60145	6.66132	12.0948	2.43882	8.29399	4.51455	7.58668	9.52979	1.26859	2.31564	-3.60608	2.03997	6.30915	0.926852	5.2472	155.641
930	-1.70718	-6.7686	6.72787	11.5459	6.5585	9.10163	3.79533	5.07484	-5.58347	6.38266	8.66602	-5.07683	3.42379	1.41064	1.56313	-3.85592	7.73867	8.65062	6.78797	12.1797	2.48055	8.32975	4.64668	7.65473	9.9505	1.86115	2.69959	-3.71834	2.23964	6.91861	0.780821	5.29488	154.969
932	-1.31379	-6.56197	7.54893	12.2125	7.19627	9.51191	4.18921	5.61873	-5.05944	7.14709	8.95659	-3.93291	4.31389	1.97341	1.8095	-3.45359	8.0655	9.14385	7.24395	12.6446	2.88486	8.75543	5.08477	8.60095	10.6528	2.31912	3.14216	-3.27528	2.95291	6.1065	1.77473	5.49704	154.568
934	-0.910461	-6.20087	8.02229	12.4986	7.73221	9.63857	4.45743	5.9098	-4.88708	7.54793	9.32614	-3.46502	4.47681	2.52823	1.90983	-3.32495	8.2324	9.49055	7.45952	12.9143	3.08603	9.09418	5.25365	9.31521	10.8694	2.47161	3.25839	-2.66333	3.3622	4.40578	2.82029	5.62618	153.723
936	-1.20848	-6.40402	7.41333	11.8062	7.53403	8.91089	4.36952	5.53479	-4.8394	7.2062	9.38475	-4.54436	3.80079	1.9153	1.97142	-3.6036	7.80423	9.046	7.16349	12.4743	2.72691	8.96206	4.69486	9.07828	9.85414	2.27392	2.93006	-2.86599	3.30905	3.57081	2.40405	5.62022	152.286
938	-1.47472	-6.41594	6.55552	11.3616	7.48684	8.27462	4.47979	5.26806	-4.40677	6.71893	9.54121	-5.32418	3.18636	1.34607	2.37226	-3.91255	7.50522	8.70029	7.00156	12.1733	2.50538	8.99037	4.31389	8.89699	8.94417	2.34892	2.65837	-3.1655	3.2867	4.50611	1.78864	5.40713	150.672
940	-0.667572	-5.76874	6.07868	11.8499	7.89861	8.61585	4.88212	5.578	-4.12365	6.57539	9.94404	-4.85231	3.44714	1.60336	2.80341	-3.96023	7.81169	9.09319	7.2971	12.5984	2.78254	9.36389	4.63476	9.09368	9.40859	2.85904	2.55108	-2.74032	3.26236	6.35336	2.03848	5.00679	149.078
942	0.880659	-5.19703	6.29922	12.5214	8.29051	9.30677	5.17468	6.0459	-4.1152	6.75817	9.93907	-3.98854	4.53343	2.00669	2.89679	-3.75708	8.25475	9.63807	7.6438	13.187	3.12875	9.70066	5.10216	9.24716	10.2525	3.28322	2.49644	-2.04841	3.26683	7.68205	2.57591	4.58161	147.702
944	1.71363	-5.32468	7.25587	12.6859	8.35856	9.49105	5.07037	6.09855	-4.47333	6.73532	9.44237	-3.71436	5.21292	2.10851	2.59429	-3.65625	8.39879	9.85166	7.53949	13.4031	3.12527	9.72698	5.19554	9.24865	10.3722	3.28968	2.40803	-2.02457	2.99017	7.72576	2.64148	4.51157	147.068
946	1.02818	-5.90036	8.11617	12.4147	8.12461	9.25908	4.59651	5.77668	-5.45382	6.11991	8.91238	-4.42167	4.62482	2.12739	1.93665	-3.96719	8.35558	9.79751	7.03235	13.3907	2.85904	9.39866	5.01126	9.24269	10.0767	3.09149	2.21779	-2.72344	2.08964	6.81877	2.19842	4.85132	147.112
948	-0.229478	-6.00169	8.52843	12.3834	7.99497	9.2725	4.29799	5.54671	-6.36578	5.41757	8.69483	-5.02566	3.8753	2.2913	1.51843	-4.35114	8.55823	9.92964	6.71595	13.5894	2.77162	9.22233	4.9293	9.41704	10.098	2.97477	2.0812	-3.11037	1.26561	6.05732	2.09709	5.21938	146.666
950	-0.964602	-5.44141	8.66801	12.8239	7.8703	9.55015	4.2672	5.41657	-6.85304	4.95215	9.03557	-4.7182	4.17183	2.35736	1.60982	-4.51356	8.89997	10.3364	6.64989	13.9445	2.84165	9.28839	4.97351	9.39021	10.4258	2.77609	2.17855	-2.72145	0.848373	6.26544	2.29875	5.28644	145.199
952	-1.02868	-5.04057	8.63125	13.0991	7.7486	9.61473	4.26869	5.22286	-7.08848	4.58608	9.59337	-4.07845	5.01126	2.49594	1.92672	-4.54336	9.05146	10.6047	6.51677	14.1174	2.82923	9.34501	4.97053	9.14087	10.5619	2.49942	2.50489	-2.0961	0.628332	6.59823	2.52028	5.06938	143.494
954	-0.72817	-5.09818	8.65509	13.0961	8.0054	9.50545	4.26173	5.13693	-7.06067	4.27465	9.79155	-3.84102	5.21392	2.5332	2.1855	-4.44651	9.01421	10.6166	6.32256	14.1094	2.74728	9.42002	4.95464	9.40114	10.5148	2.25902	2.82576	-1.86016	0.456472	5.96394	2.60373	4.93427	142.201
956	-0.630816	-5.44339	8.82	12.9546	8.36949	9.44982	4.16934	5.16325	-7.1466	4.10428	9.68079	-4.24782	4.73857	2.23418	2.14428	-4.26024	8.85228	10.4646	6.06875	13.9683	2.62409	9.44485	4.95762	10.1318	10.4417	2.09014	2.84314	-2.07921	0.223021	5.16872	2.24859	5.1558	141.537
958	-0.684957	-5.9848	9.04451	12.7499	8.36551	9.53426	3.86933	5.16524	-7.8698	4.15742	9.67135	-4.57168	4.33674	2.13434	1.55618	-4.03225	8.6834	10.397	5.84523	13.8054	2.45869	9.30627	4.96606	10.4596	10.4378	2.02358	2.88785	-2.37127	-0.157952	5.57403	2.04444	5.52585	141.408
960	-0.496209	-6.41247	9.03706	12.4837	7.96517	9.34054	3.28124	4.87665	-9.03606	3.97861	9.69619	-4.61489	4.13855	2.33551	0.652671	-4.13607	8.36849	10.2669	5.5035	13.5849	2.10106	8.99583	4.7043	9.95149	10.2282	2.03053	2.91715	-2.51532	-0.821551	6.74774	2.05984	5.67387	140.964
962	-0.617901	-6.77109	8.39531	11.981	7.41283	8.5185	2.60969	4.21306	-10.1884	3.32246	9.26306	-5.13444	3.68307	2.27988	-0.0298022	-4.78079	7.71185	9.6793	4.81705	13.1483	1.49409	8.53638	3.95775	9.04749	9.47813	1.89692	2.45174	-2.75373	-1.68234	6.95189	1.81844	5.64605	140.067
964	-0.888606	-6.87639	7.88023	11.8216	7.36813	8.11269	2.53717	3.89814	-10.626	3.02295	8.96504	-5.46525	3.16252	1.87457	0.0178814	-5.11805	7.42823	9.35396	4.51406	12.8811	1.17868	8.37644	3.55343	8.74698	9.18011	1.70767	2.17458	-2.84811	-2.07474	6.10501	1.71959	5.54323	139.053
966	-0.309944	-6.50287	7.83553	12.1305	7.75655	8.49962	2.87046	4.03275	-10.2575	3.241	9.26803	-5.30779	3.00705	1.40468	0.51558	-4.97003	7.65473	9.6495	4.75943	13.0465	1.29938	8.593	3.80973	9.17663	9.67433	1.58697	2.44429	-2.36382	-1.79509	5.47518	1.74344	5.30531	137.571
968	1.00831	-5.91775	7.59562	12.2731	7.76251	8.52148	2.92162	3.83755	-9.88692	3.26882	10.0136	-5.22037	3.13024	1.22488	0.797212	-5.13792	7.67807	9.91225	4.71771	13.2417	1.3123	8.71321	3.77645	9.33905	9.77864	1.5835	2.40604	-1.53482	-1.54177	5.74042	1.6138	4.98742	135.435
970	2.16365	-5.23676	7.51118	12.5354	7.69198	8.21948	3.10391	3.56187	-9.48211	3.33389	10.9792	-4.82798	3.64135	1.68333	1.18762	-5.28246	7.63933	10.1676	4.60794	13.4622	1.29938	8.90841	3.49134	9.17266	9.67036	1.98831	2.21282	-0.804166	-1.31875	6.36429	1.82589	4.78725	133.3
972	2.42839	-4.73609	7.91351	13.0971	8.2016	8.43902	3.75013	3.75509	-8.89152	3.78937	11.5395	-4.37349	4.80761	2.23021	1.84923	-4.82798	8.11418	10.6737	5.04057	13.9549	1.7037	9.44982	3.70045	9.59734	10.103	2.65191	2.51283	-0.633796	-0.761946	6.74476	2.11944	4.94421	131.911
974	2.16613	-4.73211	8.14199	13.4329	8.8344	9.06438	4.33872	4.20809	-8.54929	4.33674	11.4143	-4.15295	6.01759	2.40405	2.33799	-4.10229	8.7589	11.1034	5.67635	14.4338	2.28335	9.98626	4.21306	10.2798	10.6042	3.08156	2.96285	-1.1161	-0.230968	7.14064	2.10404	5.21243	131.074
976	1.88996	-5.03113	7.9001	13.4284	9.09418	9.48807	4.59403	4.42366	-8.62181	4.59502	10.7974	-3.90559	6.20186	2.65489	2.6087	-3.7382	8.94517	11.1639	5.92669	14.5917	2.62062	10.2505	4.48128	10.4586	10.8093	3.30756	3.11136	-1.70618	-0.097851	7.46747	2.19047	5.23229	130.096
978	1.206	-5.64804	7.49032	13.0599	8.84483	9.17365	4.37101	3.96222	-9.15329	4.21405	10.0891	-4.27564	5.47767	2.54313	2.48502	-4.22845	8.52694	10.7631	5.49704	14.244	2.39611	10.0369	4.10279	10.1169	10.5674	3.16451	2.78453	-2.19842	-0.573198	7.15454	2.05139	5.14785	128.885
980	0.00149024	-6.45866	7.22458	12.441	8.26418	8.43008	3.81817	3.18487	-9.74188	3.47445	9.64304	-5.27948	4.98096	1.81198	1.91927	-5.13395	7.915	10.1755	4.81606	13.5839	1.75138	9.47118	3.31153	9.42995	9.92318	2.56896	2.16564	-2.65837	-1.35799	6.26792	1.70221	5.11905	127.623
982	-1.13746	-6.83814	7.52161	12.1375	8.12312	8.13107	3.57876	2.83569	-9.83626	3.12477	9.50595	-5.95401	4.91689	1.45088	1.42703	-5.45333	7.75903	9.94404	4.6432	13.3033	1.51644	9.27001	3.00606	9.34651	9.53476	2.16812	1.82887	-2.78701	-1.70916	5.92073	1.70122	5.15928	126.591
984	-1.71115	-6.88831	8.19216	12.2075	8.55774	8.36353	3.90907	3.00556	-9.50197	3.25243	9.46124	-6.08712	4.65761	1.75138	1.47174	-5.11954	8.06401	10.1601	4.9298	13.5551	1.90934	9.63509	3.27428	10.2565	9.68277	2.28037	1.9908	-2.71201	-1.50005	6.63996	1.82043	5.20249	126.07
986	-1.4479	-6.89775	8.29647	12.2885	8.88258	8.6834	4.35114	3.27528	-9.06934	3.50972	9.37879	-5.94358	4.21256	1.87506	2.01066	-4.86771	8.37992	10.4139	5.15133	13.8591	2.32905	10.0444	3.56386	10.9429	10.0772	2.78503	2.11149	-2.70257	-1.16825	7.24395	1.57903	4.99338	125.217
988	-0.447532	-6.64542	7.82857	12.441	8.96156	9.00576	4.57217	3.44863	-8.69185	3.78589	9.72499	-5.60681	4.36107	1.6277	2.5178	-4.84536	8.66503	10.5659	5.30531	14.09	2.54611	10.3424	3.73224	10.7999	10.5078	3.43571	1.93119	-2.71151	-0.920395	7.1009	1.36544	4.55827	123.593
990	0.405312	-6.45717	7.71383	12.6332	9.02017	9.36637	4.79072	3.73671	-8.21104	4.21703	10.1452	-5.60234	4.85033	1.73648	2.74827	-4.64569	8.96305	10.6866	5.54323	14.3379	2.79645	10.6017	4.00196	10.4224	10.8351	3.57976	1.90337	-2.78801	-0.541905	6.63499	1.52042	4.44154	122.444
992	0.606477	-6.58284	8.10971	12.6948	9.04898	9.55164	5.03063	4.0705	-7.57227	4.71224	9.76125	-6.05086	4.77831	2.09361	2.83768	-4.42316	9.14832	10.7249	5.71509	14.4626	3.06865	10.7378	4.27266	10.2783	10.8774	2.96185	2.20736	-2.68916	-0.0337761	6.07421	1.63764	4.84536	121.833
994	0.318388	-6.75817	8.23438	12.7872	8.96354	9.61324	5.13295	4.23143	-7.0865	5.06888	9.30875	-6.13332	4.48724	1.88599	2.91069	-4.37299	9.16421	10.6032	5.80847	14.397	3.18239	10.7134	4.42912	10.2003	10.7979	2.49346	2.61515	-2.49197	0.310938	5.64456	1.53532	5.23776	120.839
996	-0.17186	-6.72688	7.40389	12.894	8.64069	9.47813	4.96407	4.2215	-7.08799	5.21094	9.10163	-5.52237	3.85692	1.39078	2.77857	-4.36902	8.87613	10.2321	5.72304	14.0394	2.97576	10.4055	4.40031	9.83824	10.6901	2.43684	2.81433	-2.5024	0.330806	5.41806	1.5383	5.3669	119.36
998	-0.296036	-6.49343	6.46164	12.8781	8.3516	9.30925	4.84337	4.40925	-7.04825	5.67138	8.98043	-4.98742	3.09398	1.48217	2.63502	-4.0248	8.54184	9.92864	5.76029	13.6296	2.77509	10.1338	4.40776	9.37283	10.5426	2.50041	2.9698	-2.48452	0.510117	5.31574	1.93765	5.47866	118.239
1000	0.0278154	-6.56446	6.52423	12.8478	8.4579	9.53376	5.15928	5.00232	-6.43829	6.58979	9.34998	-5.18163	3.30806	2.08865	2.81831	-3.26137	8.58903	9.94652	6.2411	13.6187	3.01451	10.2679	4.7798	9.39866	10.7144	2.86847	3.34034	-2.42641	1.26908	5.60482	2.2307	5.61923	118.132

## Sheet: 21
	FP1	FP2	F3	F4	C3	C4	P3	P4	O1	O2	F7	F8	T3	T4	T5	T6	CZ	FZ	PZ	FCZ	CPZ	CP3	CP4	FC3	FC4	TP7	TP8	FPZ	OZ	FT7	FT8	A1	BP1
-200	-0.673532	0.342727	0.0516574	0.430147	6.31412	1.3873	1.15683	0.839929	1.86612	0.226994	-1.04407	1.67539	0.0476837	0.192722	0.371039	0.365078	1.20699	0.629822	1.51247	1.05798	0.868738	1.08878	1.09722	2.67476	1.20948	0.632803	0.13113	-1.13348	1.91828	-4.25229	-0.164409	0.0764926	1.36942
-198	-0.371039	1.92821	-0.821054	1.31925	1.04159	1.32869	0.72221	0.280639	1.31428	-0.119706	-0.119209	1.43349	0.893076	0.876188	-0.0953674	0.0347694	0.447035	0.441074	0.930329	0.523031	0.184774	-0.12815	0.583629	0.335773	1.96944	0.0814597	-0.154475	-0.223021	1.32521	-1.73946	-1.17371	-0.021855	0.633796
-196	0.495712	2.3062	-0.417233	1.36892	-5.59787	0.641743	0.178814	-0.347694	0.719229	-0.59406	0.620385	0.90003	0.495215	0.261267	-0.396371	-0.358621	-0.67999	-0.0372529	0.0685453	-0.424683	-0.791748	-1.41164	-0.123183	-2.18501	1.31726	-0.897547	-0.395377	1.10616	0.829995	1.83731	-1.7946	0.111262	-0.475844
-194	0.840922	0.970562	0.906487	-0.0899037	-5.99176	0.0655651	0.469883	-0.166893	1.10368	-0.245372	1.33663	0.707308	-0.147521	-0.411272	0.047187	-0.105798	-0.951191	-0.421206	0.0094374	-0.823041	-0.959138	-1.07934	0.0993411	-2.13583	-0.421206	-1.38233	-0.184774	1.49558	1.30832	3.03884	-0.398358	0.180801	-1.0704
-192	0.407795	-0.216564	1.1762	-0.869234	-1.12156	-0.192225	1.10765	0.270704	1.75287	0.502169	1.19458	0.226498	-0.38743	0.272195	0.275175	0.337263	-0.338753	-0.317395	0.521044	-0.420213	-0.352661	0.377993	0.662605	-0.133117	-0.460446	-1.02371	0.247856	0.953178	1.98931	0.445545	1.60734	0.08593	-0.593066
-190	-0.621378	-0.336269	0.000993411	0.0869234	1.63118	-0.378489	1.06494	0.193218	1.734	0.676016	-0.0968575	-0.89556	-0.359615	1.62075	0.0799696	0.480811	-0.0531475	-0.189741	0.614425	-0.0417233	-0.0486771	0.963608	0.471373	0.908971	1.17173	-0.334779	0.507136	-0.0581145	1.94261	-1.56562	1.96397	0.0819564	0.439584
-188	-1.45435	0.013411	-1.22736	0.784795	0.0546375	0.266731	0.498692	0.117222	1.38432	0.462929	-0.761946	-1.39574	-0.143051	1.3565	-0.0754992	0.609954	-0.360608	-0.387927	0.25779	-0.107288	-0.2563	0.193715	0.399848	0.17037	1.96596	0.387927	0.606974	-0.632803	1.49657	0.158946	0.582635	0.219047	0.775854
-186	-0.94076	0.801186	-0.991921	0.488758	-1.33713	1.26263	0.252823	0.406802	1.25815	0.614921	-0.353654	-0.130137	0.700851	0.341237	0.242889	0.85334	-0.397861	-0.349681	0.0695387	-0.0953674	-0.30001	-0.419219	0.8141	0.206629	1.20302	1.131	0.693897	0.239909	1.23928	1.80354	0.100334	0.223021	0.0829498
-184	0.0491738	1.55171	-0.357131	-0.2563	0.376999	0.573695	0.567734	0.307461	1.27554	1.00682	-0.0695387	2.17309	1.27653	0.872215	0.888109	0.829001	-0.255803	-0.271698	0.0645717	-0.0879169	-0.213087	0.273188	0.450512	1.42902	-0.676016	1.54724	0.491738	1.4166	1.14987	0.68595	2.17706	0.0879169	-0.42369
-182	0.149012	1.41511	-0.949701	-0.93629	1.67986	-0.63926	0.564257	-0.258783	0.875692	0.842412	-0.17633	3.21964	0.338753	1.27703	0.575682	0.309944	-0.560284	-0.674526	-0.177324	-0.607471	-0.42369	1.02073	-0.179807	1.0401	-2.24064	0.498692	-0.220537	1.04507	0.676016	-0.395377	3.17544	-0.0476837	-0.102321
-180	-0.0288089	0.729163	-0.790755	-0.553827	0.902514	-0.160933	0.259777	-0.577172	0.419219	0.245372	-0.0332793	1.97242	-0.779827	0.279148	-0.302494	-0.346204	-0.679493	-0.722706	-0.37998	-0.825524	-0.479321	1.14491	-0.190238	0.0879169	-2.03997	-0.999371	-0.816087	-0.204643	0.0263254	-0.886122	0.630816	-0.055631	0.55929
-178	0.411272	0.368555	1.1007	0.494719	0.646214	0.855823	0.766416	-0.25183	0.810623	0.30299	0.683467	-0.17186	-0.521541	-0.568728	0.0511607	-0.355144	-0.13113	-0.0759959	-0.0501672	-0.17335	0.047187	1.65403	0.0516574	0.897547	-0.816584	-0.51409	-0.535945	-0.426173	0.195702	-1.77622	-1.82589	-0.102818	0.770887
-176	1.16775	0.047187	2.00719	0.187755	-0.0665586	0.301003	1.1906	0.134607	1.28895	0.742575	1.84228	-1.07487	0.881155	-0.488261	1.02719	0.147025	0.0263254	0.0412265	0.183781	0.0193715	0.253816	1.63118	-0.0745058	0.891586	-0.528495	1.17769	0.0571211	0.265241	0.707805	0.578662	-1.33415	-0.4674	-0.0625849
-174	1.39475	-0.77039	1.43846	-1.6436	-1.61231	-0.865758	0.588596	-0.030299	0.684957	0.478327	2.59032	-0.563761	2.25057	-0.272691	1.18266	0.304977	-0.453492	-0.526011	-0.122686	-0.483791	-0.136594	0.521044	-0.512103	-0.181297	-1.05252	2.20488	0.244379	0.457466	0.344714	4.72764	-0.627836	-0.77039	-0.773867
-172	0.945727	-1.56164	1.30484	-2.51681	-0.862281	-1.12106	0.0884136	-0.428657	-0.269214	-0.200669	1.92175	-0.0501672	2.58287	-0.243882	0.962615	-0.0119209	-0.55184	-0.567238	-0.398358	-0.55631	-0.248353	0.00347694	-0.822047	0.591576	-0.785291	2.0648	0.0839432	-0.0243386	-0.501176	3.64035	-0.539919	-0.479321	-0.0794729
-170	0.530481	-1.74592	1.60585	-0.826518	2.12689	-0.789265	0.397861	-0.51558	-0.324349	-0.33627	0.577172	-0.72966	2.47608	-0.132124	0.982483	-0.432134	0.0526508	0.0754992	-0.226994	0.0312924	0.239412	0.739098	-0.779827	2.21084	0.63926	1.54426	-0.204146	-0.273188	-0.656148	-0.454982	-0.397364	-0.162423	0.782311
-168	0.670056	-1.36892	1.30435	1.59343	4.0551	0.221531	1.15434	0.191232	0.527004	0.346204	0.507633	-1.94212	2.16166	-0.392894	1.20799	-0.278652	0.882149	0.661612	0.332296	0.683467	0.98447	1.81894	0.107785	1.99825	1.87258	1.72158	-0.00794729	-0.000993411	0.12964	-0.55035	-1.90636	-0.557303	0.223021
-166	0.779827	-1.14093	0.227988	1.84427	2.31018	0.843406	1.31826	0.659128	0.816087	0.684957	1.2368	-1.95255	1.27455	-1.1464	1.34458	0.0829498	0.822544	0.431637	0.38594	0.436604	1.00881	1.69079	0.837445	0.0367562	1.31925	2.00371	0.251333	-0.156462	0.409285	1.99129	-3.50575	-0.933806	-1.05351
-164	0.265737	-1.09673	-1.17173	0.578662	-1.95603	-0.148515	0.296533	-0.0869234	-0.207126	-0.197689	0.854333	-1.34607	0.634789	-1.81347	0.85483	-0.171363	-0.359615	-0.377993	-0.495712	-0.611941	-0.00447035	-0.0213583	0.0928839	-1.43001	-0.0799696	1.39773	-0.169873	-0.926852	-0.783304	2.87741	-2.98719	-0.582139	-1.32968
-162	-0.370046	-0.526508	-1.71214	-0.150005	-3.63588	-1.09226	-0.624855	-0.663598	-1.14739	-0.826021	0.186265	-0.825028	0.892083	-1.58747	0.101825	-0.369052	-0.957151	-0.64224	-1.09076	-0.994901	-0.575185	-1.10219	-0.763933	-0.85632	-0.607967	0.55482	-0.516574	-1.26163	-1.78566	2.42392	-1.12156	-0.025332	-0.304977
-160	-0.845889	0.315408	-0.518064	-0.783304	-0.93927	-1.26759	-0.366072	-0.327826	-1.01825	-0.222524	0.277658	0.485281	1.26263	-0.212093	-0.00794729	0.0203649	-0.264247	-0.13262	-0.73264	-0.383457	0.0377496	-0.161926	-0.627339	1.21842	-1.09275	0.352164	-0.362595	-0.879665	-1.44293	0.859797	1.7792	0.344217	0.792245
-158	-1.41859	0.914931	0.860294	-1.05798	1.3868	-1.26163	-0.0486771	-0.108282	-0.752509	0.182788	0.740588	1.08282	1.08729	1.15782	0.352661	0.191728	0.394881	0.379483	-0.305474	0.179807	0.5578	0.667075	-0.441074	1.56909	-1.10169	0.343223	-0.331799	-0.34819	-1.03265	0.460943	3.65525	0.350674	0.781318
-156	-1.92424	0.802676	1.04159	-0.223021	0.584622	-0.715752	-0.90152	-0.358621	-1.5681	-0.411769	0.98298	-0.965099	0.476837	0.758469	0.0312924	-0.0794729	0.223517	0.411272	-0.578165	0.174344	0.223517	-0.531971	-0.385443	-0.684957	0.0596046	-0.0452002	-0.498195	-0.224511	-1.54575	3.38107	1.80304	0.00298023	-0.0223517
-154	-1.55419	0.134607	1.2065	0.313918	-0.0720223	-0.00695388	-1.80056	-0.415742	-2.94149	-0.971059	0.588099	-2.20388	-0.0958641	-0.503163	-1.01874	-0.130137	0.0710289	0.388424	-1.0247	0.190238	-0.104805	-1.75585	0.000993411	-1.59442	0.573695	-0.474354	-0.26226	-0.207623	-2.35985	4.70877	-0.859797	-0.239909	-0.571211
-152	-0.141064	-0.0705322	1.73897	-0.202656	1.37289	-0.159442	-1.83781	-0.383457	-3.57529	-1.11163	0.320375	-0.0988444	-0.412265	-0.38594	-1.72208	-0.0342727	0.263751	0.451505	-1.1459	0.43263	-0.0794729	-1.507	-0.177324	-0.2111	-0.276665	-0.935296	0.115732	0.450512	-2.68767	2.02656	-1.04407	-0.284115	-1.00285
-150	0.999371	-0.147521	1.32422	-0.568231	3.73771	-0.51558	-1.35948	-0.502169	-3.06815	-1.06394	0.373522	1.46429	-1.3262	0.170867	-1.55866	-0.0700355	0.477334	0.438591	-0.988444	0.637273	0.0317891	-0.402828	-0.836949	0.784298	-0.827511	-1.45435	0.00645717	1.11759	-2.30869	-1.05798	-0.175834	-0.223021	-1.1464
-148	0.792742	-0.915428	-0.118216	-0.564257	4.59005	-0.566244	-1.04457	-0.642737	-2.2923	-0.923872	-0.334779	0.577668	-2.64645	-0.201662	-1.30484	-0.159442	0.51707	0.319382	-0.829001	0.540912	0.0804663	0.226994	-1.00682	0.421703	-0.566244	-1.77175	-0.25332	0.524024	-1.73698	-2.96881	0.156462	0.103811	-0.148018
-146	-0.252823	-1.58697	-0.992914	-0.684957	1.81347	-1.18514	-1.61429	-1.00185	-2.34495	-1.19855	-1.40866	-0.643233	-2.51184	-0.694891	-1.87655	-0.400841	-0.0531475	-0.107288	-1.19656	-0.100334	-0.436604	-0.976026	-1.13845	-0.253816	-0.950694	-1.96844	-0.247856	-1.18464	-1.84526	-3.32644	0.011921	0.492732	1.42753
-144	-0.611941	-0.762939	-0.156959	-0.080963	-1.32024	-1.33266	-1.58946	-0.916918	-2.01017	-1.16229	-1.72406	-0.963608	-0.706315	-0.360111	-1.9754	-0.330806	-0.311434	-0.166893	-1.1608	-0.281135	-0.606477	-1.55618	-1.01924	0.0382463	-1.20699	-1.67936	-0.0963608	-1.90089	-1.63565	-2.35836	-0.313918	0.473857	1.89195
-142	-0.177324	0.736614	0.699361	0.723203	-2.34197	-0.576675	-0.523527	-0.210106	-0.663598	-0.232458	-1.32769	-0.306964	0.293056	0.2111	-0.827511	0.0372529	0.0829498	0.0258287	-0.381966	0.04222	-0.0730157	-0.358125	-0.484784	-0.0839432	-0.861287	-0.933806	0.0630816	-0.751515	-0.55184	-1.24077	-0.288586	-0.00198682	0.622869
-140	0.161926	0.866751	0.421703	0.917415	-1.99229	0.138581	-0.0918905	0.175337	-0.0332793	0.308454	-0.889103	-0.0461936	-0.441074	-0.479817	-0.0178814	0.102321	0.244379	-0.101825	0.0109275	0.0769893	0.196199	0.133614	0.0342727	-0.956158	-0.422696	-0.114739	0.145038	0.418226	-0.0501672	-0.318388	-1.16676	-0.272195	-0.565747
-138	0.0357628	-0.0511607	0.0923872	0.292559	0.0427167	0.047187	-0.294546	-0.0938773	-0.462929	-0.255803	-1.05848	-0.105302	-1.05699	-1.46826	-0.0730157	-0.266234	0.116229	-0.308951	-0.117719	-0.0581145	0.0392397	-0.22004	0.0198682	-0.747542	-0.312428	0.313421	0.00447035	0.0730157	-0.565747	-0.311931	-2.49495	0.00198682	-0.414749
-136	-0.204643	-0.610948	-0.409782	-0.960131	2.62608	-1.41909	-0.433624	-0.642737	-0.73115	-0.953674	-1.33415	0.946224	-0.901024	-0.794232	-0.204643	-0.747542	-0.177821	-0.581642	-0.331799	-0.334283	-0.241399	-0.223517	-0.858307	0.0139078	-1.66744	-0.291566	-0.349681	-0.750522	-1.00384	-1.47521	-0.721713	0.237922	-0.269214
-134	-0.064075	-0.412265	-1.50998	-1.1459	3.43323	-2.57889	-0.232955	-0.671546	-0.356138	-0.879168	-1.25964	1.33216	-0.90301	0.183781	-0.190238	-0.925362	-0.303487	-0.63926	-0.244379	-0.507633	-0.264744	0.394384	-1.24027	-0.0605981	-2.56151	-1.30882	-0.615915	-0.595053	-0.709295	-2.78701	2.0961	0.0824531	-0.463426
-132	0.220537	0.584126	-1.87308	0.205139	1.71363	-1.62621	0.188748	-0.129143	0.0198682	-0.453492	-1.01378	0.145535	-1.17322	-0.142554	-0.261764	-0.879169	-0.00347694	-0.0139078	0.192225	-0.222027	0.103315	0.980496	-0.262757	-0.822047	-0.920395	-1.17421	-0.693897	0.161429	-0.241895	-2.67724	1.73996	-0.0645717	-0.249843
-130	0.528991	1.65006	-0.584126	1.18464	-1.06196	0.565747	0.315905	0.628332	0.255307	-0.00695388	-0.441074	-0.887116	-1.36594	-1.3272	-0.405808	-0.655651	0.390907	0.7689	0.713269	0.255803	0.552336	0.649691	1.33415	-1.1613	1.41263	-0.440081	-0.484288	0.600517	0.155965	-1.12901	-0.574688	-0.105798	-0.424186
-128	0.93927	1.49707	0.663102	0.337263	-3.03785	1.51942	0.226994	1.17719	0.72817	0.406802	-0.103315	-0.930329	-1.2959	-1.74393	-0.127157	-0.208616	0.292063	0.626842	1.00533	0.174344	0.659625	-0.330309	2.12789	-1.12553	1.52588	-0.445545	0.097851	0.706812	0.557303	0.020365	-0.954171	-0.220537	-1.28647
-126	1.43399	0.178814	0.698368	-0.516574	-3.70791	0.835955	0.406802	1.11163	1.20749	0.56078	-0.0397364	-0.383953	-0.133614	-0.447532	0.469387	0.0998378	-0.0452002	0.0119209	1.07139	-0.114242	0.484784	-0.742575	1.28001	-0.693897	0.335773	0.0352661	0.710785	0.753005	0.716249	-0.130633	0.886619	-0.376999	-1.45485
-124	1.72555	-0.843902	0.0904004	0.436604	-3.94036	0.016888	0.653664	0.572205	1.24772	0.368059	0.160933	-0.0188748	0.975033	0.993907	0.692407	-0.0993411	-0.203649	-0.102818	0.989437	-0.0993411	0.242392	-0.399351	-0.0531475	0.0312924	-0.00993411	0.777841	0.789265	0.874698	0.696878	-0.668069	1.9754	-0.333289	-0.762939
-122	1.22041	-0.832478	-0.861784	0.931323	-4.4778	-1.11113	0.185271	-0.323355	0.657141	-0.433127	-0.038743	0.187755	0.000993442	1.30037	0.475844	-0.780821	-0.657141	-0.152985	0.445545	-0.409782	-0.394384	-0.766913	-1.07835	-0.284115	-0.147521	-0.0650684	0.281135	0.955661	0.196199	-1.24127	1.54277	0.152489	-0.841916
-120	0.162919	-0.0312924	-1.31925	-0.0342727	-3.96619	-1.82887	-0.501176	-0.730157	0.0496705	-1.19458	-0.0332793	0.624855	-1.5532	0.826518	0.33776	-1.09474	-0.949701	-0.207126	-0.0372529	-0.694891	-0.835458	-1.45237	-1.26759	-0.804663	-0.303984	-0.915925	0.0953674	0.596046	-0.463923	-1.35253	0.68297	0.526508	-1.5681
-118	-0.527004	0.848373	-0.464916	-0.426173	-1.50452	-0.781318	-0.194709	0.0288089	0.247359	-1.11063	1.04258	1.04755	-1.78069	-0.101328	0.624359	-0.576178	-0.284612	0.237922	0.330309	-0.107785	-0.29405	-0.886122	-0.069042	-0.0576178	-0.134607	-0.0938773	0.547369	0.00695388	-0.3467	0.268221	0.311434	0.219047	-1.3873
-116	-0.419716	1.19011	0.845889	0.481804	0.867248	1.14789	0.420709	0.935793	0.77486	-0.547866	1.79758	0.343223	-0.724693	-0.772377	0.872711	-0.0466903	0.649194	0.933309	1.02272	0.855327	0.453989	-0.180801	1.30683	1.18166	0.957151	1.15484	0.866751	-0.0605981	0.301003	2.41597	0.0526508	-0.299513	-0.817577
-114	-0.113746	1.15931	1.24077	1.09275	1.79013	2.44578	0.364085	1.26561	1.05153	0.075996	1.16477	-0.890593	0.919898	-0.564257	0.502666	0.175337	1.00285	1.25766	1.35601	1.27753	0.662605	-0.372032	1.84923	1.45038	2.14279	1.05947	1.06295	0.263751	0.906487	2.54661	-0.525514	-0.332793	-0.430644
-112	-0.133614	0.856817	0.796715	0.112752	1.74791	1.96348	0.253816	1.14838	1.12553	0.543892	-0.0238419	-0.435114	1.23481	0.177821	-0.0605981	0.371536	0.80814	0.861784	1.35452	0.985463	0.497202	-0.282625	1.51594	0.797212	1.62919	-0.137091	1.59889	0.309944	1.22686	0.000496737	-0.368555	0	0.228981
-110	0.107288	0.323852	0.0764926	-0.51856	0.901024	0.311434	0.602504	0.801186	1.20848	0.797709	-0.378489	0.444055	0.038743	0.824531	0.0466903	0.543892	0.424186	0.30001	1.1459	0.523527	0.230471	0.474354	0.612934	-0.0963608	0.930826	-0.718733	1.90238	-0.0551343	1.33763	-1.58548	0.126163	0.100334	0.823538
-108	0.494222	-0.3015	-0.68446	0.17037	0.448028	-0.392397	0.794729	0.351171	1.21345	0.50664	0.0228484	-0.21706	-0.886619	1.17123	0.373026	0.286599	0.127653	0.0317891	0.760953	0.246863	-0.0784794	0.867744	-0.143548	-1.01427	0.956158	-0.322858	1.3272	-0.537932	1.20004	-0.140071	0.169873	0.0193715	0.993411
-106	-0.108778	-1.18315	-1.20501	0.0829498	1.2661	0.0153979	0.29405	-0.241399	0.697871	-0.473857	-0.647207	-0.902514	-1.02222	1.01229	-0.12517	-0.573198	-0.232955	-0.279148	0.210106	-0.0963608	-0.452995	0.489751	-0.506639	-1.55121	0.107288	0.393391	-0.0625849	-1.20451	0.506143	1.1757	0.427663	0.124673	0.882645
-104	-0.80665	-1.11163	-1.27554	-0.317891	1.14938	1.21097	-0.356634	-0.181297	0.296533	-0.824531	-1.58797	-0.630319	0.257293	-0.454982	-0.7237	-0.893076	-0.364085	-0.357628	0.00397364	-0.273685	-0.494719	-0.286102	-0.0307957	-1.5974	-0.472367	0.514587	-0.841419	-1.34458	0.122686	1.03315	-0.593066	0.144045	0.0958641
-102	-0.270704	0.0799696	-0.643233	0.658135	-1.69724	2.98272	-0.374516	0.941257	0.615915	0.0963608	-1.01825	-0.631313	2.29329	-1.85172	-0.376999	0.172357	0.109275	0.17335	0.46591	0.200669	-0.0327826	-0.93629	1.31627	-0.890096	1.0853	-0.0844399	0.210106	-0.185768	0.675519	-0.305971	-2.86351	-0.12666	-1.07288
-100	0.323852	0.149508	-0.313421	1.33216	-5.5482	2.74678	-0.275175	1.22239	0.734131	0.831981	0.0466903	-0.850856	2.51085	-0.829001	0.0675519	0.983477	-0.0397364	0.135601	0.418723	0.13113	-0.211596	-1.72257	1.27504	-0.900527	2.08318	-0.266234	1.18663	0.698368	1.05848	-0.548363	-2.43286	-0.158449	-1.16279
-98	-0.458956	-0.673532	-1.25517	0.130634	-5.79456	-0.330806	-0.727177	-0.117719	0.169873	0.680983	0.0620882	-0.472864	0.481804	1.50104	-0.488758	0.374516	-1.06047	-0.883142	-0.550846	-1.01626	-1.20898	-2.18948	-0.829995	-2.04643	0.0511607	-0.103315	0.506639	0.0352661	0.795225	0.698864	0.665088	0.429153	-0.12517
-96	-1.46826	-0.693897	-1.89344	-0.823538	-1.36743	-2.37624	-0.796219	-0.858804	0.0293056	0.925859	-0.76741	-0.189245	-1.28696	2.44677	-0.936786	-0.164409	-1.15931	-1.12951	-0.836452	-1.21892	-1.3118	-0.891089	-1.89791	-1.35154	-1.83831	-0.42518	-0.328819	-0.683467	1.00732	-0.556807	2.73039	0.884632	0.474354
-94	-1.23978	-0.0104308	-1.34607	-0.0139078	2.77658	-0.927846	0.173847	0.0814597	0.808636	1.8999	-1.38134	-0.541906	-1.47174	1.37935	-0.121196	0.397364	-0.0139078	-0.116229	0.0466903	0.016888	-0.244379	1.1757	-0.548363	0.680486	-0.742575	-0.711282	-0.25183	-0.439088	1.84576	-3.29663	1.72555	0.556807	-0.00198682
-92	-0.667075	0.316401	-0.97851	0.59406	2.89281	0.977019	0.847876	0.863771	1.07636	2.24511	-1.48664	-1.01626	-1.30186	0.191232	0.766913	0.93778	0.559787	0.372032	0.500679	0.645717	0.301997	1.60486	0.662108	0.764926	0.80814	-0.502666	-0.0149012	-0.501672	1.89195	-3.80576	-0.0486771	0.0377496	-0.475844
-90	-1.02818	-0.346204	-1.70122	-0.628829	-0.0506639	0.548859	0.0864267	0.149012	-0.0561277	1.32024	-0.919402	-0.718733	-1.20997	-0.0158946	0.505149	0.577172	-0.378986	-0.464916	-0.371039	-0.332793	-0.498692	0.033776	-0.0089407	-1.66794	-0.0417233	-0.255307	-0.453492	-1.35849	0.513593	-0.389417	0.319878	-0.0288089	-0.2563
-88	-1.58002	-1.41362	-2.2466	-2.40356	-0.942747	-0.326832	-0.837942	-0.674029	-1.06196	0.409782	-0.653664	0.72072	-0.905991	-0.252326	-0.255307	0.0456969	-1.21146	-1.19706	-1.26163	-1.28796	-1.20451	-1.12851	-0.791252	-3.091	-1.77026	-0.207126	-1.01576	-1.72953	-0.669559	2.04593	1.3118	0.252326	0.359615
-86	-1.18862	-1.6277	-1.39872	-2.48154	1.48267	0.377993	-0.552336	-0.281135	-0.661115	0.962615	-1.08828	1.7797	-0.693897	-0.620385	-0.364085	0.125666	-0.554323	-0.781318	-0.931323	-0.754495	-0.617902	-0.196199	-0.0670552	-1.59691	-1.86265	-0.00397364	-0.923872	-0.93927	-0.168383	-0.85781	0.783801	0.399351	0.563264
-84	-0.181794	-0.673532	0.180304	-0.772874	2.2307	1.44045	0.231465	0.668565	0.221531	2.01017	-0.64671	1.11858	-0.236928	-0.769397	0.322362	0.630816	0.577668	0.0958641	-0.0432134	0.361602	0.359118	1.02818	1.24872	0.213583	-0.367065	0.789762	-0.50962	0.641247	0.81857	-3.31004	-0.920395	0.116726	-0.278652
-82	0.288586	-0.111262	1.17073	0.352164	0.271698	1.11759	0.147025	0.810126	0.105302	1.4782	0.202656	-0.227988	0.410775	-1.51694	0.644724	0.743568	0.682473	0.38296	-0.0268221	0.618895	0.451505	0.526508	1.32173	0.584126	0.38743	1.2666	-0.472864	1.49608	0.340243	-2.24511	-1.75635	-0.157456	-0.698368
-80	-0.22004	-0.768403	0.93778	0.0347694	-0.735621	-0.38147	-0.629326	-0.187755	-0.839929	-0.184278	0.0630816	-1.10616	0.187258	-1.80751	0.214577	0.064075	0.0228484	0.0347694	-0.826518	0.192225	-0.135104	-0.539919	-0.250836	0.140568	-0.176827	0.836452	-0.996888	0.692407	-1.02619	-0.629822	-0.698865	0.0715256	0.373026
-78	-0.582635	-1.42107	-0.112255	-0.616908	0.369052	-1.80155	-0.772377	-1.0704	-1.30534	-0.832975	-0.80814	-0.900527	-0.392894	-0.439584	0.202159	-0.436604	-0.264744	-0.30448	-1.21842	-0.110269	-0.413259	-0.21706	-1.77473	-0.227988	-1.13348	0.629822	-1.3113	-0.405808	-1.55121	0.373026	0.983973	0.294546	1.04904
-76	-0.0238419	-1.63416	-0.63777	-0.301003	2.58933	-1.21444	-0.229975	-0.623862	-1.09573	-0.392397	-1.97093	-0.586112	-0.243386	0.576178	0.635286	-0.0362595	0.334779	-0.0149012	-0.759959	0.248353	0.0432134	0.93629	-1.25666	0.414252	-0.821054	1.10865	-0.736117	-0.59853	-1.29938	0.221034	0.635286	0.148018	0.627836
-74	0.742575	-1.53085	-0.0993411	1.19656	4.01139	0.850856	-0.122686	0.164906	-0.94672	-0.356138	-2.2764	-1.39475	0.0531475	0.46442	0.612934	0.407795	1.10219	0.743071	-0.26077	1.06891	0.628829	1.28398	0.197192	1.46925	1.31329	1.42703	-0.0764926	-0.21557	-1.23531	-0.89854	-1.80552	0.0958641	0.731647
-72	0.638763	-0.794729	0.142554	1.13646	2.84612	1.08927	-0.542402	-0.0735124	-0.983973	-0.788768	-0.889103	-0.963112	0.106792	0.522534	0.542402	0.157456	0.893076	0.777344	-0.416239	1.06742	0.55184	0.666579	0.108778	1.15633	1.79311	0.838935	-0.0263254	-0.162919	-1.281	-0.164906	-2.02656	0.358621	1.63813
-70	-0.328819	0.0461936	-0.04222	-0.847379	0.47187	-0.406305	-0.571708	-0.540415	-0.845393	-0.807643	0.260274	0.964602	-0.025332	0.933806	0.684957	-0.0526508	0.308454	0.147025	-0.713269	0.398358	0.270208	0.420213	-0.635286	0.637273	-0.267228	0.0615915	0.0531475	-0.446538	-0.959138	0.866254	0.647704	0.494719	1.87705
-68	-0.613431	0.201662	0.550846	-1.38233	-1.1613	-1.53879	-0.338753	-0.645717	-0.777344	-0.540912	-0.00596046	1.60088	0.293553	1.34508	0.46591	0.0258286	0.197689	-0.0198682	-0.795722	0.169377	0.202159	0.593066	-0.85781	0.981986	-1.60784	-0.0531475	0.198682	-0.293553	-0.73264	-0.312924	3.10491	0.258287	1.07487
-66	0.0635783	-0.524521	1.62373	-0.34074	-0.689427	-1.3565	-0.449022	-0.760456	-1.39823	-0.579655	-0.7689	0.779827	0.6482	1.11163	-0.13113	-0.141064	0.315905	0.370046	-0.894566	0.360608	0.140568	0.326335	-0.820061	1.52538	-0.983973	-0.149508	-0.0581145	0.0094374	-1.14143	-1.46528	3.52661	0.0571211	0.598033
-64	0.741084	-1.57754	1.51843	0.0889103	1.56611	-0.292063	-0.834465	-0.652174	-2.32061	-0.891586	-1.03811	-0.0397365	-0.259777	-0.120699	-0.769397	-0.280142	0.498692	0.596543	-0.936786	0.574688	0.201662	-0.0114242	-0.233452	1.54575	-0.264247	-1.02321	-0.347197	0.120699	-1.74046	-0.894566	1.78317	0.000496705	0.760456
-62	1.18961	-1.84427	0.432134	0.235438	2.47955	0.609954	-1.27703	-0.367065	-2.75324	-1.00831	-0.107785	-0.571708	-0.645717	-0.975033	-0.935793	-0.080963	0.705818	0.566244	-0.852843	0.748535	0.420213	-0.301003	0.448028	0.459949	0.0342727	-2.06679	-0.271201	0.526011	-1.97788	0.999868	-0.651677	-0.189741	0.896056
-60	1.36594	-0.850856	0.282129	0.812113	1.34955	1.19309	-1.43449	-0.17037	-2.638	-0.905991	1.01179	-0.304977	-0.0327826	-0.38892	-0.548363	0.30299	0.880659	0.667572	-0.668069	0.933806	0.657141	-0.722706	0.510613	-0.225008	0.889103	-2.14924	0.119209	1.03712	-1.96397	1.41809	-2.04841	-0.341237	0.909964
-58	1.09722	1.07487	0.838935	1.26312	-0.278155	1.11113	-1.35452	-0.107785	-2.44478	-0.791748	1.3873	0.855327	-0.610948	0.0615915	-0.427663	0.555317	0.829995	0.830988	-0.454982	0.870228	0.718236	-0.932813	0.254313	0.163913	1.55816	-1.28845	0.387927	1.26859	-1.9441	-0.269214	-2.1562	-0.282129	0.523031
-56	0.424186	2.30422	0.686447	1.12653	-2.33948	0.0884136	-1.65651	-0.351171	-2.59529	-0.593066	1.13845	1.07487	-2.15173	-0.764926	-1.12752	0.389417	0.2111	0.625352	-0.548859	0.293553	0.258287	-1.34607	-0.241896	-0.226001	1.22736	-0.641247	0.221531	1.01427	-1.82688	-1.2661	-2.16266	0.0183781	0.211596
-54	-0.0874201	1.94013	-0.354648	0.494719	-3.99748	-1.19656	-2.27243	-0.922382	-2.71648	-0.431637	0.346204	0.260274	-2.18401	-1.34061	-2.11398	-0.0506639	-0.837445	-0.136097	-1.01477	-0.657141	-0.597537	-2.36134	-1.09076	-1.91331	-0.215073	-1.0848	-0.290076	0.332793	-1.4777	-0.349681	-1.42952	0.361602	0.348687
-52	-0.0740091	1.05848	-0.935296	-0.0874201	-2.5024	-1.40468	-1.67489	-0.863274	-1.65155	0.207126	-0.249843	0.47485	-1.02868	-0.679493	-1.87357	0.0342727	-0.961622	-0.647704	-0.716249	-0.922879	-0.550846	-2.08616	-1.26412	-2.25405	-1.62075	-1.58002	-0.587602	-0.257293	-0.539919	0.202159	0.770887	0.47485	0.561774
-50	0.286599	0.388424	-0.540415	-0.245869	-0.121693	-0.432134	-0.178814	-0.100334	0.0129143	1.12057	-0.154475	1.06841	-0.666082	0.0899037	-0.497699	0.475347	-0.0536442	-0.406802	0.392397	-0.259777	0.448028	-0.458459	-0.519057	-1.02917	-1.21742	-0.736614	-0.553827	-0.199179	0.552833	-0.704328	1.98781	0.371536	0.748038
-48	0.551343	-0.21408	-0.448525	-0.272195	-0.598033	0.72072	-0.0352661	0.309447	0.291566	0.889599	0.182788	0.584126	-0.386933	0.0536442	0.0089407	0.472864	0.331302	-0.162919	0.820557	0.0839432	0.841419	0.0372529	0.216564	-0.825524	0.0531475	0.377993	-0.568728	0.252326	0.441074	-0.522037	1.21146	0.297527	1.00334
-46	0.194212	-0.902514	-0.925362	-0.753005	-0.905991	2.11547	-0.802179	0.595053	-0.426173	0.0566244	-0.216067	-0.418723	-0.325839	-0.564257	-0.551343	0.532468	0.365078	-0.266731	0.77188	-0.00496705	0.829001	-0.250836	1.0853	-1.20451	0.7237	-0.0327826	-0.355144	0.112752	-0.312428	0.574191	-0.667075	0.329812	1.2065
-44	-0.405808	-0.868738	-0.674029	-0.818074	0.369549	2.63651	-0.678003	1.08083	-0.329812	0.205636	-0.94523	-0.904997	-0.960131	-0.436604	-0.757972	1.07835	0.77337	-0.120203	1.14938	0.194212	1.12901	-0.196695	1.53184	-0.532965	1.10716	-1.21345	0.491242	-0.201166	-0.107288	0.204643	-1.46826	0.258287	0.874698
-42	-0.618895	-0.299017	0.116229	-0.108778	0.299017	1.22984	-0.00695388	1.06196	0.563761	0.748038	-0.911951	-0.779331	-1.20203	1.04904	-0.431637	1.13298	0.975033	0.190735	1.5234	0.421206	1.18961	-0.21855	0.722706	0.615418	0.855823	-1.42654	1.02421	-0.00645717	0.694891	-0.253817	0.531475	0.239909	0.138581
-40	-0.805656	-0.72221	0.0849366	-0.249346	-0.239412	-0.459452	0.168383	0.317395	0.583132	0.337263	-1.29044	-0.712276	-1.55667	1.86712	-0.580649	0.0402331	0.538925	-0.00794729	1.25865	0.162423	0.793735	-0.236928	-0.444551	1.31627	-0.664095	-1.04308	0.30001	0.0317891	0.620882	-0.721216	3.33041	0.455479	-0.299017
-38	-0.941257	-1.66148	-0.406305	-0.25928	0.222027	-0.0889103	0.0104308	-0.013411	-0.124176	-0.428657	-1.72406	-1.7032	-1.69526	0.880659	-1.22637	-0.94076	0.241896	-0.1659	0.951688	0.0317891	0.613431	-0.252823	-0.392894	1.06245	-0.727673	-1.08828	-0.527998	0.204643	0.154475	-1.46677	2.58833	0.47485	-0.416736
-36	-0.585616	-1.82986	-0.642737	0.827014	0.0452002	1.77821	0.283619	0.601013	0.271201	-0.264744	-0.447532	-2.77609	-0.51558	0.164906	-1.055	-0.759463	0.563761	0.234445	1.26412	0.411272	0.945727	-0.258287	0.59406	-0.00248353	1.47521	-1.09722	-0.537932	0.68744	0.706812	-0.0238419	-1.35452	0.0864267	-0.42667
-34	-0.122686	-1.44988	0.299017	1.36197	-0.575185	2.28832	1.01179	0.950197	1.21047	0.257293	0.920395	-1.02272	0.805656	1.26412	-0.0536442	-0.272195	0.90003	0.72221	1.72208	0.794729	1.29441	0.428657	0.830491	0.337263	2.09262	-0.212093	-0.378986	0.429153	1.35452	0.997384	-1.76628	-0.150502	0.161429
-32	0.51409	-0.624359	2.05686	1.3113	-1.33663	1.69526	1.12504	0.615915	1.11759	-0.185271	1.39078	1.16577	1.51197	2.05586	0.127653	-0.328819	0.831981	0.978013	1.66496	0.926356	1.12901	0.695884	0.498692	1.26312	1.86811	0.713269	-0.338753	0.0913938	0.820061	0.866254	0.163416	-0.0526508	0.477334
-30	1.0858	0.42965	2.55158	0.85185	-1.18862	0.77039	0.580649	0.221531	0.460446	-1.06444	1.35551	1.50005	0.914435	1.17173	-0.842412	-0.584622	0.561774	0.880162	1.23233	0.752012	0.586112	0.192722	0.246366	1.20898	1.61976	0.00645717	-0.164906	0.33627	-0.0223517	0.635286	0.016888	0.135104	-0.173847
-28	1.02222	1.31279	1.56611	0.499686	0.656148	-0.558793	0.733137	0.266234	0.301003	-0.906984	0.990927	1.95454	-0.276168	-0.0153979	-1.17669	-0.409285	0.34223	0.644724	1.09076	0.5126	0.360111	0.369052	0.0779827	1.25865	0.179807	-1.07338	0.190735	0.630319	0.107288	-0.475844	0.197689	0.190735	-0.589589
-26	0.884136	2.28037	0.665585	1.30385	1.85569	-1.17669	1.59939	0.652174	0.833968	0.021855	0.875195	2.34892	-0.380973	-0.51856	-0.199179	-0.0496705	0.25034	0.498195	1.30882	0.462929	0.497202	1.09126	0.13411	1.15782	-0.541409	-0.334283	0.430147	1.12454	0.979503	-1.43598	1.734	0.016888	-0.398854
-24	0.861784	2.79248	0.715256	2.04345	2.07225	-0.279148	1.99477	0.904004	1.58449	0.389417	0.428657	1.69774	-0.455479	-0.616908	0.531475	0.0347694	0.433624	0.541906	1.46131	0.618895	0.650684	1.57108	0.620385	0.957151	0.533958	0.686447	0.294546	1.31975	1.51247	-2.28335	1.70022	-0.120699	0.0844399
-22	0.557303	2.3519	0.671049	1.48565	1.72704	1.3272	1.53681	0.973543	1.87109	0.0581145	0.0615915	0.611444	-0.663598	-0.958641	0.530481	0.0397364	0.635783	0.596543	1.33763	0.651181	0.645717	1.39376	1.47969	0.650187	1.44243	0.779331	0.166396	0.335276	1.24524	-1.96944	-0.502169	-0.0486771	0.63777
-20	0.0591079	1.25964	-0.247359	0.340243	1.13895	1.36395	0.629822	0.617902	1.57009	-0.392397	0.17186	-0.0551343	-0.205636	-0.789265	0.257293	-0.0427167	0.263254	0.179807	0.781318	0.161926	0.171363	0.397861	1.4176	-0.524024	0.728667	0.503659	0.0973543	-0.839929	0.619888	0.391404	-1.48515	0.0685453	0.865758
-18	-0.139077	-0.0874201	-1.11163	-0.788271	0.761946	-0.499189	-0.047187	-0.150502	1.27355	-0.522534	0.322858	0.186265	0.772874	0.198682	0.12666	-0.330806	-0.534952	-0.617902	0.109275	-0.627836	-0.583132	-0.553827	0.016888	-2.05139	-0.723203	0.0933806	-0.221034	-0.881155	0.292063	3.37164	0.299513	-0.0144045	0.698368
-16	0.194709	-0.783801	-1.03166	-1.25716	0.566741	-1.75933	0.225504	-0.64075	1.62671	-0.206133	0.0094374	0.687937	1.31875	0.583629	0.64522	-0.511607	-0.949701	-0.89407	-0.157456	-0.931323	-0.841419	-0.148515	-1.04258	-1.8989	-1.34706	0.472367	-0.407795	-0.287592	0.670056	3.80576	1.60585	-0.164409	0.261764
-14	0.568231	-0.351171	-0.106792	-0.396371	1.72009	-0.207126	1.12305	-0.170867	2.12292	0.435611	-0.916918	0.343223	0.274678	-0.0327826	1.26511	-0.191728	-0.335276	-0.198185	0.097851	-0.142058	-0.238419	1.25269	-0.233948	0.64373	0.272195	1.13696	0.0601013	0.12517	1.3565	0.775357	-0.574191	-0.133614	-0.297527
-12	0.275671	0.0491738	0.606477	0.345707	3.87381	1.46925	1.64558	0.609458	2.01066	0.893573	-1.03364	-0.016888	-0.909468	-0.642737	1.44492	0.365575	0.450512	0.363092	0.319878	0.603	0.344714	2.11547	1.08977	2.5625	1.88301	1.03017	0.667075	0.069042	1.58896	-1.47323	-2.09063	-0.103315	-0.25183
-10	-0.584126	-0.495712	0.376503	-0.0307957	3.96967	0.0268221	1.58399	0.472864	1.47223	0.739098	-0.21259	-0.280142	-0.382463	-0.318388	1.51147	0.450015	0.150998	-0.145038	-0.069042	0.0546376	-0.0799696	1.8691	0.843902	1.62472	0.86079	0.813603	0.660121	-0.615915	1.22041	-0.950694	-0.327826	-0.29554	0.177821
-8	-1.32322	-1.22537	-0.112255	-0.861784	0.103315	-2.14577	1.0108	-0.334779	0.84887	0.222027	0.619392	-1.11312	1.50899	-0.104805	1.28398	0.0844399	-0.925362	-1.02123	-0.977019	-1.06543	-1.09971	0.645717	-0.207623	-0.395874	-1.0247	1.16974	0.448028	-1.4171	0.548859	0.573695	0.622869	-0.563264	-0.158449
-6	-1.43399	-1.40468	-0.210106	-1.56611	-4.7336	-2.59479	-0.141064	-1.14242	0.138084	-0.275671	1.48912	-1.10964	2.90424	-0.553827	0.454485	-0.367065	-1.93218	-1.41313	-2.00321	-1.82837	-2.02308	-1.07437	-0.966092	-1.21196	-1.99874	1.41213	0.229478	-1.64807	-0.213583	2.26299	-0.313918	-0.620882	-1.20302
-4	-0.529488	0.0298023	0.125666	-1.14143	-5.78016	-1.63962	-0.829498	-1.44094	-0.224014	-0.353158	2.40157	-0.0869234	2.82427	-0.645717	-0.00298023	-0.476837	-2.05586	-1.00682	-2.39859	-1.76082	-2.25455	-1.8999	-1.09375	-0.452499	-1.809	0.73264	0.0392397	-0.612934	-0.634293	3.42131	-1.52091	-0.68446	-2.37326
-2	0.330806	2.60472	0.119706	-0.210603	-2.75671	-1.01825	-0.263751	-1.21097	-0.21855	-0.00248353	2.26647	0.197689	2.51631	-0.269214	0.740588	-0.121693	-1.46329	-0.510613	-1.9908	-1.20898	-1.76777	-0.861784	-0.888606	0.409285	-1.4325	0.620882	0.0779827	0.827511	-0.513593	2.48055	-1.53383	-0.801682	-2.68867
0	0.0839432	3.83506	-0.403821	-0.697871	0.559787	-1.3575	0.42518	-1.0709	-0.355144	0.343223	1.19309	0.231961	2.76069	0.498692	1.62671	0.197192	-1.0555	-0.729163	-1.54873	-1.02073	-1.25766	0.877678	-1.04507	0.447035	-1.51445	1.91182	0.0407298	1.05749	-0.436604	-0.0531474	-0.170867	-0.674526	-1.63962
2	-0.4674	3.31451	-0.621875	-1.81148	0.179311	-1.11808	0.225504	-1.13398	-0.583132	0.417232	0.59406	0.448525	2.67973	0.628829	1.659	0.207126	-1.18266	-1.18961	-1.58995	-1.26312	-1.27355	0.978013	-1.18713	-0.405312	-1.32571	2.49594	-0.183781	0.408292	-0.64522	-0.978013	0.380476	-0.551343	-0.60151
4	-0.55333	2.47409	-0.207126	-1.42505	-2.37773	-0.0144045	-0.579158	-1.27008	-0.913938	-0.0958641	0.775854	-0.581642	1.23829	-0.326832	1.11858	-0.107288	-1.52985	-1.16179	-2.03749	-1.35154	-1.63118	-0.523031	-0.977516	-1.15186	-0.219047	1.60585	-0.526011	-0.148018	-1.20848	0.209113	-1.02868	-0.717739	-0.420709
6	-0.166893	2.2014	0.782808	-0.503163	-1.32024	0.189245	-0.951688	-1.42852	-1.3719	-0.737607	0.829498	-1.36693	-0.428657	-0.416736	0.718236	-0.331799	-1.40071	-0.788271	-2.35687	-0.990927	-1.66098	-1.06047	-0.919898	0.0491738	0.238915	1.04606	-0.631313	-0.198185	-1.89592	0.772874	-1.70519	-0.991424	-0.581642
8	0.140568	2.43634	1.33365	-0.795722	2.64545	-0.747542	-0.478824	-1.35501	-1.75138	-0.591576	0.0784794	-0.0442068	-0.411272	0.320872	0.944734	-0.0452002	-0.837445	-0.579655	-2.14775	-0.596046	-1.18117	0.333786	-0.863771	1.46329	-0.701845	1.42256	-0.363092	0.139574	-2.14477	-0.180304	-0.455479	-1.08182	-0.546873
10	-0.103315	2.0956	0.577668	-1.17819	3.50028	-1.21444	-0.229975	-1.09772	-2.27938	-0.562767	0.0605981	0.906487	0.147521	-0.229975	1.21643	0.305474	-0.631809	-0.577668	-1.92622	-0.468393	-0.884632	1.36793	-0.26077	0.738601	-0.835458	1.59591	-0.231465	-0.0258287	-2.48154	-0.548859	-0.460943	-0.954668	0.377993
12	-0.437597	0.828505	-0.897547	-1.65403	-0.156959	-2.21729	-1.27057	-1.74443	-3.3319	-1.96844	0.955164	0.262757	-0.201166	-1.7792	0.803669	-0.17186	-1.56909	-1.25269	-2.72294	-1.23332	-1.73996	-0.094374	-0.677009	-1.48813	-1.39972	0.905494	-0.545879	-0.931323	-3.82215	1.10865	-1.28696	-0.880162	1.23829
14	0.120203	0.187258	-1.37885	-2.22574	-3.01103	-3.61105	-2.3375	-2.72691	-3.90311	-3.17047	1.11709	-0.025332	-0.200669	-1.67787	0.383457	-0.670056	-2.58386	-2.0509	-3.65327	-2.15371	-2.75671	-1.88947	-2.19693	-2.46614	-2.75473	0.12815	-0.622869	-1.12901	-4.77731	2.59827	-0.331302	-1.02818	0.649691
16	1.16229	0.98596	-0.0352661	-0.846386	-1.84625	-2.85506	-1.74989	-2.38021	-2.86996	-2.31117	0.539422	-0.219544	0.447035	0.217557	0.778337	-0.125666	-2.02606	-1.53333	-3.14166	-1.59293	-2.27342	-1.44541	-2.44826	-1.01874	-1.78218	0.824531	-0.0144045	-0.193715	-3.69598	1.91728	1.21693	-1.21941	-0.203152
18	1.03265	1.42654	1.00533	0.38296	-1.93417	-0.751019	-1.07835	-1.6282	-1.83533	-1.08778	-0.523031	-1.4022	0.962615	1.0704	1.14491	0.317891	-1.3416	-0.907481	-2.43336	-0.94672	-1.59442	-1.16924	-1.72754	-0.558297	-0.0750025	2.1105	0.313918	-0.0144045	-2.34346	0.875692	0.245869	-1.22438	-0.216067
20	-0.388424	0.0645717	0.387927	-1.25964	-4.4773	-0.0506639	-1.7032	-1.72953	-2.27292	-1.27008	-1.30385	-1.95354	1.43349	0.594556	0.745058	-0.0700354	-1.80155	-1.3868	-2.74728	-1.49707	-1.95056	-2.37972	-1.49806	-1.46727	-0.672042	1.73201	0.0432134	-1.23332	-2.39015	-0.00149012	-2.17905	-0.961622	0.475844
22	-1.48863	-1.20699	-0.213583	-2.79347	-4.55876	-1.14242	-2.07126	-1.88897	-2.77162	-1.63019	-1.01825	-1.19954	1.14987	0.432134	0.448525	-0.272195	-2.08467	-1.6883	-2.89232	-1.81993	-2.08418	-2.55803	-1.45932	-1.00782	-2.00371	0.424683	-0.0904004	-1.84278	-2.60125	-1.5979	-2.16514	-0.634293	0.781814
24	-1.40866	-0.563264	-0.196199	-1.70569	-3.14166	-2.03749	-1.52787	-1.4772	-2.33352	-1.09822	0.200669	-0.989934	-0.25481	0.373522	0.757972	0.210603	-1.62174	-1.282	-2.26945	-1.35849	-1.51743	-1.40568	-1.38382	-0.679493	-1.47621	0.102321	0.136097	-1.08331	-2.111	-0.628332	-0.487765	-0.681976	-0.0804663
26	-0.763436	1.19805	0.104805	0.103315	-2.40803	-1.21842	-1.02371	-0.849366	-2.0504	-0.666082	1.17371	-1.82291	-1.08927	-0.382463	0.811617	0.837445	-0.955164	-0.72072	-1.48813	-0.723203	-0.845393	-0.516077	-1.10219	-1.16328	0.416239	0.589589	0.675519	-0.355144	-1.82887	2.11944	-0.884136	-0.915925	-0.516077
28	-0.252823	2.57393	0.694891	0.162919	-1.69426	-0.136594	-0.98596	-0.717739	-2.50985	-0.924865	0.313421	-2.12987	-1.03017	-0.84887	0.0660618	0.873705	-0.577172	-0.376503	-1.07785	-0.332793	-0.543892	-0.338753	-0.8593	-0.293553	0.823538	0.2111	0.979503	-0.452002	-2.00172	1.21494	-2.1716	-0.710785	0.489255
30	0.00248353	3.32892	0.868738	-0.64075	-1.33365	-0.38296	-0.94672	-0.942747	-2.70506	-1.06345	-1.282	-1.30236	-1.33117	-0.324349	-0.581642	0.43114	-0.549853	-0.30299	-0.899533	-0.296036	-0.529985	-0.393887	-1.13597	0.64373	-0.461439	-0.708302	0.852843	-0.501672	-1.88698	-1.59244	-1.10666	-0.367065	1.11014
32	0.204146	3.55045	0.51707	-0.353654	-1.4777	-0.72221	-0.547866	-0.646214	-1.99676	-0.805656	-1.66049	-0.439088	-1.15236	0.450512	-0.338753	0.203152	-0.25332	-0.0705322	-0.405312	-0.0854333	-0.181297	-0.261267	-1.14342	0.328322	-0.81112	-0.261267	0.884136	0.153482	-1.35501	-2.2009	0.25183	-0.446041	0.533462
34	0.381966	2.71996	0.0203649	0.370542	-1.47919	-0.370542	-0.609458	-0.168383	-1.55965	-0.870724	-0.880162	-0.64075	0.033776	0.501176	-0.326335	0.08593	0.187755	0.273188	-0.0248353	0.30448	0.240405	-0.593563	-0.689924	-0.17037	-0.0114242	0.373522	0.797212	0.514587	-1.17471	-0.847379	-0.445545	-0.721216	-0.119209
36	0.352661	1.88847	-0.780821	0.326832	-1.4017	-0.589589	-1.38779	-0.309944	-1.97291	-1.38034	0.190735	-1.18713	0.852843	-0.391404	-1.13746	-0.169873	0.0715256	0.274181	-0.17037	0.227491	0.189245	-1.26958	-0.572205	-0.93778	-0.1659	-0.536938	0.407298	0.00248353	-1.46031	1.22438	-0.5578	-0.664592	-0.346204
38	-0.00298023	2.19345	-1.38879	-0.566741	-2.01563	-1.55717	-1.81894	-0.691911	-2.16067	-1.60138	0.702341	-0.443558	0.439584	-1.00533	-1.51147	-0.307957	-0.363092	-0.0908971	-0.291566	-0.227988	-0.0740091	-1.54624	-0.887613	-1.29342	-1.44641	-1.43449	0.576675	-0.59555	-1.47323	1.75138	1.10318	-0.277658	0.116229
40	-0.258287	3.36667	-0.612934	-0.462929	-1.9143	-0.68446	-1.25517	-0.225008	-1.73996	-1.05798	0.491242	0.338753	-0.418226	-0.527998	-0.917912	0.0382463	0.102818	0.163416	0.286599	0.161926	0.376999	-1.19607	-0.345707	0.00298023	-0.803173	-0.59853	1.3863	-0.46442	-1.01229	-0.184278	0.966092	-0.189245	1.13199
42	-0.248849	4.34717	0.499189	0.72221	-0.329812	1.281	-0.523527	0.64224	-1.48912	-0.450512	-0.0357628	0.0794729	-0.89854	0.575682	-0.317891	0.509123	1.09375	0.858307	1.06593	1.06792	1.21097	-0.535448	0.712772	1.08232	0.98894	0.626345	1.81198	0.077486	-0.664592	-1.01924	-1.13249	-0.361602	1.87159
44	-0.401338	3.85245	0.156959	0.793735	0.716746	0.934799	-0.547369	0.500182	-1.86612	-0.842909	-0.951191	-0.417233	-1.4027	0.920892	-0.244876	0.25034	1.09375	0.810623	1.06692	1.055	1.17073	-0.464916	0.579655	0.667075	0.615418	0.577668	1.48366	0.0794729	-0.93927	0.450015	-1.9441	-0.102321	1.94063
46	-0.753502	2.48055	-0.459452	0.417233	2.10305	-0.163416	-0.556807	0.00198682	-2.22276	-1.71115	-1.67588	-1.13746	-2.08368	0.262757	-0.500679	-0.358125	0.835955	0.599027	0.867248	0.86079	0.924865	-0.287592	-0.030299	0.645717	0.0576178	-0.464916	1.06593	-0.475844	-1.4474	0.356634	-1.47671	0.189741	1.97937
48	-0.972052	1.42852	-0.160933	-0.0496705	2.86152	-0.485778	-0.0779827	0.097851	-1.94361	-1.81446	-1.43001	-1.04954	-2.22077	0.0233452	-0.72519	-0.322362	0.979503	0.513097	1.12802	0.950197	1.14342	0.366072	-0.0511607	0.701845	0.232458	-1.52439	1.12255	-0.973046	-1.42654	-2.10553	-0.568728	-0.0695387	2.4125
50	-0.689924	1.33018	0.914435	-0.828008	0.315905	-0.661115	0.246366	0.694394	-1.32521	-1.30683	-0.0993411	0.391901	-1.07934	-0.216564	-0.635286	0.184278	0.957648	0.351171	1.45535	0.814597	1.31031	0.188748	0.59704	-0.156462	-0.111759	-1.54128	1.55419	-0.737111	-0.94523	-2.73089	-0.164906	-0.374516	2.0961
52	-0.318885	2.04196	1.48068	-1.08033	-2.40604	-1.29541	0.0615915	0.635286	-0.915428	-1.43449	0.998874	1.29491	0.55929	-0.332793	-0.586112	-0.231961	0.46442	0.344714	1.281	0.416239	1.03712	-0.749528	0.674526	-1.06394	-0.529488	-0.750522	1.19855	-0.165403	-0.799696	-0.912944	-0.503163	-0.21855	1.07189
54	-0.496209	2.52376	0.60449	-1.44045	-2.41349	-1.95007	-0.0139078	0.119209	-0.38743	-1.74691	0.203152	0.941753	1.61479	-0.138581	-0.710785	-1.2214	-0.0605981	0.21557	1.09076	-0.0114242	0.769397	-0.941753	0.152985	-1.47323	-0.72221	0.0392397	0.30448	-0.251333	-0.561277	0.104805	0.0591079	-0.0745058	0.638763
56	-0.618895	2.80688	0.0293056	-1.38531	-0.344217	-0.118216	1.09524	1.21842	0.980496	-0.559787	-1.10269	-0.291566	1.84377	-0.479817	-0.0660618	-0.727673	0.674526	0.543892	2.20239	0.596046	1.69029	0.411769	1.45088	-0.797709	0.522534	0.194212	0.733634	-0.323852	0.831485	0.294546	0.258783	-0.43263	0.734131
58	-0.222524	3.39051	0.739098	-0.284115	1.78268	2.25902	2.8799	2.83817	2.65092	1.44541	-1.34607	-1.21097	1.23829	0.418226	1.39078	0.508626	2.04543	1.38481	3.87083	1.85817	3.06716	2.23418	2.97924	0.59853	2.33452	0.16739	1.82142	0.316401	2.59976	0.239909	0.229478	-0.807146	0.841419
60	0.207623	3.6781	1.30932	0.0546376	1.38928	1.75635	3.70294	2.88834	3.43074	2.40604	-1.29491	-0.17037	0.0198682	2.37525	2.22723	0.659128	2.1408	1.43101	4.27614	1.91083	3.17395	2.8943	2.12391	0.939767	1.61827	0.684957	1.84675	0.532468	3.24994	-0.355641	2.36481	-0.681976	1.1002
62	0.631313	3.41882	1.28994	-0.668565	-1.33564	1.04606	3.24498	2.49793	3.26385	2.18004	-1.12851	1.25865	-0.945727	2.15371	2.04295	0.278155	1.3719	0.830491	3.75062	1.01874	2.45124	2.14477	1.22935	0.205636	-0.267724	1.07487	1.3262	-0.0799696	2.84861	0.208616	2.95093	-0.320375	1.68135
64	1.09772	3.67959	1.67241	-0.516574	-1.91331	2.16961	2.86053	2.95987	3.57429	2.10404	-0.858307	1.32869	-0.883639	0.747542	2.16415	0.420709	1.31329	0.836949	3.73026	0.903507	2.36879	1.5378	1.96099	0.355641	-0.201662	1.52191	1.33912	-0.38743	2.83122	1.09772	-0.0183781	-0.238915	2.05636
66	0.914931	4.7187	2.04146	0.778337	0.563761	2.86748	3.11881	3.71685	4.84486	2.88188	-0.8141	0.267724	-0.101328	0.736614	3.07858	0.94374	1.77026	1.20501	4.24236	1.43449	2.865	1.76579	2.76814	1.06941	1.07586	2.60224	1.66496	-0.25481	3.70045	1.00831	-2.04692	-0.471373	2.13732
68	0.273685	5.74142	1.42306	2.26994	1.62075	2.62608	3.29316	4.12514	5.72354	3.52114	-0.307461	-1.20054	0.849366	1.12404	3.6637	1.39972	1.74642	1.26809	4.42515	1.50949	2.96533	1.79758	2.99662	0.524521	2.337	3.00656	1.90188	-0.0561277	4.29451	2.26895	-2.25951	-0.599027	2.10404
70	-0.0566244	6.38614	0.374019	2.46465	1.31329	1.89741	2.99861	3.81619	5.19206	2.67625	0.47187	-1.43101	1.36991	1.28249	3.20276	1.22041	1.16229	1.00086	3.87232	1.09325	2.44329	1.60635	2.60025	-0.755489	2.6529	1.68135	1.85569	0.242392	3.48538	4.7038	-1.80105	-0.549356	1.54525
72	0.0427167	6.35684	0.580649	1.07785	2.7885	0.952184	3.01103	3.39895	4.0104	1.23829	0.077486	-0.186761	1.35948	1.75238	2.62558	0.938773	0.980496	0.780324	3.38952	0.891089	2.20835	2.2769	2.07822	-0.338753	1.69178	0.750025	1.62721	0.440578	1.96596	3.62595	-0.270704	-0.566244	0.951688
74	0.231465	5.04206	1.67886	-0.137587	4.09583	1.20997	3.69151	3.85642	3.54449	1.13249	-0.591576	1.00583	0.959138	2.06878	2.98768	1.40866	1.37985	0.717243	3.74466	0.976026	2.54611	3.31799	2.5476	1.12851	0.972549	1.59343	1.72555	0.203649	1.37736	-0.951687	1.07189	-0.758966	1.18017
76	0.117719	2.90324	1.50104	-0.457962	1.7335	2.21034	3.97017	4.29899	3.68307	1.77721	0.124176	0.463426	0.588596	1.49508	3.71734	1.90089	1.12603	0.490248	3.83457	0.64522	2.39462	2.96334	3.18686	1.00136	0.770887	2.20438	1.79857	-0.25183	1.6133	-2.98967	0.414749	-0.872711	1.52538
78	-0.475347	1.5974	0.285109	-0.202656	-2.37127	2.13583	3.38654	3.86536	3.66469	1.65651	0.605484	-1.16875	1.00285	0.275671	4.00692	1.83433	0.194709	0.275175	3.01947	0.0144045	1.48416	1.40369	2.80788	-0.111759	0.515083	2.10802	1.32918	-0.580152	1.59045	-1.63068	-1.07437	-0.673532	1.30286
80	-1.19259	1.61727	-0.770887	-0.488758	-4.73658	0.929832	2.49495	2.94993	3.20772	0.750522	0.151992	-1.23034	1.47472	0.352164	3.63936	1.65651	-0.692904	-0.0109275	1.95354	-0.628332	0.42518	0.245372	1.69426	-1.26014	-0.175834	2.3827	0.739594	-0.815093	0.795225	0.628332	-0.684957	-0.452499	0.716746
82	-0.833472	2.86798	-0.763933	-0.879665	-4.24385	0.847379	2.30521	2.78503	2.86102	0.538925	0.327329	-0.536442	1.12305	1.56462	3.33637	2.03351	-0.771383	-0.0158946	1.58399	-0.629326	0.213583	0.481804	1.51346	-1.43399	-0.0521541	2.71102	0.908971	-0.42965	0.202159	2.48601	0.628332	-0.532468	0.0779827
84	-0.0546376	4.20958	0.188748	-0.16739	-1.01179	2.52575	3.17593	3.65774	2.96732	1.47372	0.55482	-0.880162	0.266234	1.55717	3.72231	2.90871	0.16739	0.631313	2.15073	0.21706	1.07984	1.91331	2.6678	0.38147	1.40915	2.48998	1.80354	0.0844399	0.452995	1.27951	0.170867	-0.63926	0.0322859
86	-0.531475	3.7238	0.1659	-0.0367562	2.0504	2.43982	3.42578	3.61353	2.2913	1.48813	0.00695388	-1.33862	-0.305971	0.520051	3.61999	3.0607	0.402828	0.573695	2.05139	0.268718	1.17968	2.51432	2.8039	1.659	1.17024	1.64062	2.12441	-0.493228	-0.0173847	-1.39972	-0.909468	-0.356138	0.737607
88	-1.07189	2.87294	-0.94076	-0.822544	0.784795	0.0516574	2.32806	2.31465	0.825524	0.29703	-0.402828	-1.31925	0.145535	0.0094374	2.76665	2.31415	-0.719726	-0.444551	0.839432	-0.784298	0.00248353	1.22835	1.43846	0.309944	-0.582139	0.840425	1.2671	-1.14143	-1.42256	-0.93778	-0.944734	-0.179311	1.04457
90	-0.271698	3.75112	-1.10815	-0.934303	-3.05126	-0.603994	1.83086	2.08765	0.532468	0.514587	-0.173847	-0.931323	2.01662	0.0213583	2.81731	2.2317	-1.31677	-0.816087	0.401338	-1.20848	-0.474354	0.194212	1.1151	-1.40568	-0.721713	1.77175	0.663102	-0.979006	-1.52936	1.51048	-0.835458	-0.681976	0.64075
92	0.221034	4.75148	-0.570714	-0.858307	-3.38107	0.690917	2.61168	3.35524	1.66247	2.81433	-0.0998378	-0.22004	2.99911	-0.313918	3.62595	3.29514	-0.80963	-0.548363	1.11858	-0.927846	0.217557	0.901024	2.31614	-1.69675	-0.353654	3.60906	1.36197	-1.21892	0.144541	2.69065	-0.364085	-1.17222	0.712276
94	-0.929832	4.41521	-0.526011	-0.885626	0.144044	0.792245	3.32743	4.14054	2.56201	4.87069	-0.672042	-0.0665585	1.2815	-0.162919	3.98109	4.1162	-0.433127	-0.494222	1.76579	-0.843406	0.737607	2.22822	2.8198	-1.50353	-0.617902	3.89814	2.35538	-2.19593	1.658	2.06629	0.290076	-0.845889	1.43796
96	-2.21878	3.63439	-0.183284	-1.04109	2.70903	-0.678003	3.3314	3.93987	2.49147	5.38429	-1.41362	-0.488758	0.347197	1.18365	4.0248	4.26322	-0.561277	-0.602504	1.85966	-0.932813	0.599027	2.94546	2.00172	-0.791748	-1.01527	3.08156	2.90473	-2.6529	1.84526	-0.0496706	0.345707	-0.361105	1.79857
98	-2.14179	3.54797	0.420709	-1.76181	1.76976	-1.95354	3.00705	3.8594	2.33998	5.67635	-1.61082	-0.683963	1.45485	2.2009	4.2061	4.42366	-0.94672	-0.912448	1.69675	-1.21047	0.217557	2.68569	1.40518	0.194212	-1.69377	2.62906	2.96136	-2.11547	1.67688	-1.53979	0.437597	-0.565251	1.08431
100	-1.43399	3.75211	0.364582	-1.87457	-1.41561	-2.05537	2.99166	4.33475	3.14713	6.74178	-0.93629	-0.998378	2.34445	1.8691	4.61588	4.81208	-1.43001	-1.33663	1.73648	-1.60933	-0.0506639	1.86016	1.79907	0.0188748	-1.75039	3.53058	2.61068	-1.69277	2.36084	-0.512103	0.276665	-0.949701	0.281632
102	-1.30832	2.65191	-0.310441	-1.4628	-4.12067	-0.975033	3.25988	4.84387	4.61191	7.82808	-0.38743	-1.66049	2.63502	0.830988	4.825	5.24471	-1.93665	-1.79013	1.89046	-2.08666	-0.229478	1.12454	2.38866	-1.31726	-1.44094	4.51058	2.412	-2.01464	3.76304	1.67936	-0.702341	-0.858804	0.644724
104	-1.67936	0.534952	-1.01129	-2.09957	-3.92348	0.229975	3.51419	5.02815	5.67486	8.24581	-1.2671	-1.88152	1.84526	0.357131	4.43161	5.67287	-2.2014	-2.24859	2.01066	-2.56399	-0.241399	1.03513	2.47061	-2.10404	-2.06729	3.70095	2.58287	-2.13881	4.90497	1.54823	-1.35998	-0.548363	1.15931
106	-1.78019	-0.578165	-1.35799	-3.01351	-1.88301	0.452002	3.74069	5.28047	6.09358	8.27312	-2.41498	-1.98483	0.742078	0.356634	4.00941	6.2868	-2.13931	-2.53965	2.31862	-2.77311	-0.0615915	1.432	2.49843	-2.2312	-2.83072	2.76615	3.08355	-1.57009	5.28196	0.106295	-1.73499	-0.636776	0.405312
108	-1.60287	-0.114242	-1.35551	-3.06368	-0.621875	0.529985	4.31885	6.12587	6.93202	9.21786	-1.90238	-2.72195	1.23183	0.555813	4.5384	7.27673	-1.83185	-2.51234	3.1059	-2.55108	0.408292	1.8845	3.16749	-2.19544	-2.30819	3.10143	3.88175	-1.45584	6.09954	1.09673	-2.84066	-0.89705	-0.394384
110	-1.99179	0.906984	-1.68532	-3.01301	-0.519554	-0.142058	5.02268	6.75122	8.38637	11.0626	-1.68035	-2.99464	1.67688	0.954171	5.41707	7.98305	-1.82837	-2.63055	3.94831	-2.55704	0.740588	2.10752	3.41485	-2.0201	-1.7032	3.17345	4.39584	-2.63949	7.93089	1.27057	-3.07063	-0.649691	-0.0630816
112	-3.05325	1.60187	-2.6678	-3.24647	-0.962118	-2.62707	5.16474	6.29276	9.34799	12.2095	-3.08255	-2.57939	0.318388	0.892083	5.54174	7.77543	-2.45124	-3.27875	4.12017	-3.32246	0.397364	1.91033	2.31614	-2.22623	-2.48551	2.06828	4.26223	-4.0253	9.45181	-1.97738	-1.1305	-0.0571211	0.777841
114	-3.55691	2.25604	-2.95838	-3.32644	-0.971556	-3.36419	5.18709	6.14971	9.75033	12.66	-3.37561	-2.37276	-0.543396	0.668069	5.71012	7.69645	-2.57542	-3.67711	4.3114	-3.74367	0.34074	1.85718	1.97043	-2.15669	-3.06368	1.60088	4.12712	-4.19716	10.3141	-4.11222	0.237922	0.140568	1.43001
116	-2.87791	3.24249	-2.51085	-3.59962	-0.959635	-0.885626	5.42998	7.10438	10.2232	13.1915	-1.86612	-1.83384	0.59555	0.613431	6.30418	8.33968	-2.01315	-3.57081	5.0202	-3.42876	0.912448	1.99676	3.41584	-2.06083	-2.60125	2.92559	4.45048	-3.42329	11.1257	-2.33303	-1.02272	-0.38296	0.898043
118	-2.47409	3.70244	-2.54909	-4.12613	-0.738601	1.21494	5.86957	7.83453	11.155	13.7215	-0.886122	-1.2209	1.9754	0.886619	6.483	8.85477	-1.72655	-3.39051	5.67536	-3.13769	1.35352	2.4115	4.63625	-2.45124	-2.186	4.23888	4.96258	-3.05474	12.1151	0.599523	-2.78453	-0.797212	-0.204643
120	-3.40094	2.78006	-3.16302	-4.49071	0.443061	0.662108	6.25104	7.56731	12.1792	13.9455	-1.54724	-1.43598	1.60585	1.24723	5.89639	8.79715	-1.95354	-3.57181	5.88149	-3.32048	1.31925	2.9703	4.09087	-2.47558	-2.58634	3.22262	5.31971	-3.54797	13.0102	1.71065	-2.53071	-0.451505	-0.144541
122	-4.49568	0.747045	-3.51171	-4.96556	1.61032	-2.15222	5.96543	6.27488	12.1951	13.3822	-2.75572	-1.39773	-0.312924	1.55419	5.06341	7.94133	-2.71251	-4.36654	5.37088	-4.05759	0.650684	2.69661	2.01762	-2.18799	-4.46439	0.961622	4.88112	-4.35114	12.9278	0.571708	0.37849	-0.0412265	0.825028
124	-4.36604	-0.505646	-2.92758	-4.7336	2.19643	-3.11881	5.72006	5.55366	11.7118	12.7524	-2.96136	-1.90437	-0.90152	1.4171	5.16921	7.02441	-2.84115	-4.60049	5.17716	-4.13656	0.414749	2.26001	1.29193	-1.73549	-5.21839	0.904997	4.1162	-4.48128	12.4797	-1.19209	1.21643	-0.276665	1.34458
126	-3.38753	-0.114739	-2.35438	-3.74019	1.88102	-0.856817	5.88199	6.12984	11.7833	12.9044	-2.38965	-3.62545	0.154475	0.926852	5.77619	6.77804	-2.11	-3.86288	5.83927	-3.36667	1.05848	2.59727	2.64694	-1.38034	-3.46551	2.56548	3.91205	-3.78788	12.7708	-1.86811	-1.82937	-0.691414	1.281
128	-2.96583	0.464916	-2.29528	-4.18921	0.801683	0.13262	5.57502	6.33101	11.8166	13.1418	-2.15918	-3.71039	0.274678	0.63926	5.3972	6.41346	-2.06878	-3.58323	6.07421	-3.2569	1.21842	2.69115	3.16948	-1.83384	-2.69761	2.92758	3.72877	-3.6339	13.1811	-1.96497	-3.20921	-0.543892	1.38034
130	-3.52959	0.370542	-1.97838	-5.74837	-0.303487	-0.514587	5.05696	5.97338	11.5767	13.2993	-2.44975	-2.19792	-0.0824531	0.20961	4.62731	5.95798	-2.50588	-3.94285	5.87056	-3.6185	0.85781	1.9456	2.76963	-2.76963	-3.00705	2.00272	3.36021	-4.53393	13.4463	-1.70221	-2.14378	-0.215073	1.36048
132	-4.13358	0.030299	-1.74095	-6.21577	-0.860791	-0.700355	5.07236	5.74042	11.4426	13.3673	-2.52873	-1.28547	-0.365575	0.516574	4.45098	5.58794	-2.44776	-4.07547	5.97537	-3.45161	0.85036	1.52389	2.6385	-2.81831	-2.2014	1.75337	3.10044	-5.05547	13.6162	-0.950197	-1.43449	-0.240405	1.14987
134	-3.96967	0.272194	-1.90288	-5.31326	-1.60287	-0.800689	5.10017	5.36243	11.2856	12.5622	-2.34991	-1.60833	-0.981987	1.1012	4.47879	4.69337	-2.21233	-3.75609	6.05235	-3.07262	0.950197	1.56363	2.61913	-2.29379	-1.16378	1.94758	2.74032	-4.33375	13.2789	-0.386934	-2.02755	-0.381966	1.43598
136	-3.20971	1.63068	-2.19146	-3.8296	-3.26683	-0.94374	4.59005	4.93377	10.9449	11.3378	-1.99924	-3.25292	-0.900527	0.286599	4.05411	3.53605	-2.25107	-3.31153	5.81145	-3.08603	0.847876	1.1459	2.74132	-2.98421	-1.0247	1.30087	2.43336	-3.17643	12.7032	0.580152	-3.35127	-0.305474	1.47621
138	-2.67128	3.09497	-2.43932	-3.09696	-4.44154	-0.913441	3.88374	4.54386	10.2157	10.7224	-1.8388	-4.48624	0.0149012	-0.921885	3.02295	2.63155	-2.47906	-3.3468	5.52982	-3.40939	0.647207	0.505646	2.73436	-4.21554	-1.6878	0.607471	2.23617	-2.99265	12.2016	1.16577	-3.79086	-0.242889	0.779827
140	-2.53469	3.83059	-2.5322	-3.32693	-5.2611	-0.881155	3.4367	3.82761	9.08375	10.3205	-2.37028	-2.90821	-0.0486771	-0.248849	2.23716	1.77224	-2.70158	-3.64284	5.28495	-3.72132	0.353157	0.229478	1.92672	-4.48376	-2.50439	0.420213	1.95851	-3.48041	11.5107	-0.489255	-2.44975	-0.34819	0.274181
142	-2.21431	4.30395	-2.14279	-2.47757	-5.29438	-0.397364	3.24349	3.09447	8.20657	9.60479	-2.51432	-0.576178	-1.62522	1.47323	2.02209	0.975529	-2.51283	-3.21319	5.07732	-3.392	0.331302	0.25779	1.03563	-3.69747	-1.80701	-0.0908971	1.79708	-3.14663	10.8242	-2.88785	-1.4176	-0.42965	0.38594
144	-1.95603	3.73373	-1.31627	-0.876685	-2.62857	0.585616	2.89778	2.86003	7.76748	8.85179	-2.30422	-0.786285	-2.67227	1.31975	1.41611	0.433624	-1.85321	-2.25057	4.94967	-2.44876	0.73115	0.232458	1.08977	-2.19097	-0.383457	-1.13696	2.07524	-2.56151	10.4869	-3.66122	-2.42641	-0.321368	1.14143
146	-2.2769	1.57058	-1.2671	-0.803669	-0.648697	0.29405	2.34793	2.66284	7.24147	8.29399	-2.28087	-1.60982	-2.27392	-0.0119209	0.612934	-0.128647	-1.50949	-2.03003	4.72665	-2.04742	0.882149	-0.0228485	1.25815	-1.65006	-1.32223	-1.12603	2.38915	-2.79844	10.2594	-3.05474	-2.06977	-0.0849366	2.60522
148	-2.31167	0.361105	-1.95801	-1.52439	-2.88635	-0.875692	1.75287	2.25008	6.59873	8.04712	-1.6282	-1.37935	-0.97851	-0.242889	0.556807	-0.76592	-1.73102	-2.39313	4.32183	-2.2456	0.599027	-0.708799	1.04556	-2.76417	-2.64396	-0.123183	2.2312	-2.7582	9.9962	-1.59144	0.0183781	-0.245372	3.31799
150	-1.73946	1.53929	-2.15371	-2.04593	-5.72105	-1.37389	0.85632	1.56363	5.46575	7.35124	-1.13398	-0.768403	-0.255307	0.245372	0.3467	-1.59393	-2.17706	-2.58485	3.618	-2.47558	0.0695387	-1.57754	0.619392	-4.05759	-2.70307	-0.309944	1.6128	-2.05239	9.04401	0.21408	1.06643	-0.744065	2.33054
152	-1.76728	3.32544	-1.86811	-2.89629	-5.30928	-0.716249	0.0412265	0.989437	3.9354	5.94755	-1.92076	0.445048	-1.04457	-0.400841	-0.476837	-2.54015	-2.17408	-2.43088	2.98719	-2.38965	-0.123183	-1.4469	0.522534	-3.96619	-3.08752	-1.18415	1.07437	-1.89791	7.45803	0.513593	1.24176	-0.680486	1.47671
154	-2.16216	4.46339	-0.946224	-2.05487	-2.78403	1.89245	0.143548	1.49757	3.29614	5.29935	-2.54661	0.502666	-1.82738	-1.48714	-0.747045	-2.79993	-0.788271	-1.27604	3.30706	-1.0555	0.868738	-0.103315	1.58598	-1.87258	-1.52141	-1.01427	1.37339	-1.99378	6.7989	-1.02172	0.0437101	-0.270704	1.97838
156	-1.82837	4.73907	0.239412	0.788768	-0.868738	3.90857	0.665088	2.36183	3.75509	5.8646	-1.60386	-0.591079	-0.999371	-0.810623	-0.202656	-2.45174	0.858307	0.313918	4.01189	0.752509	2.04345	0.712275	2.6226	0.216564	2.06182	-0.021855	2.10802	-1.57058	7.33932	-2.10057	-1.48614	-0.378489	2.85407
158	-1.11113	4.09335	0.435611	1.81297	-0.652671	2.1855	0.497699	2.05884	3.83159	5.9853	0.123183	-0.6785	0.215073	0.765423	0.225504	-2.76566	0.904004	0.631809	3.73969	0.998378	1.89543	0.109275	2.03898	0.164906	2.94894	0.626345	2.14626	-1.32372	7.47939	-0.94076	-0.786285	-0.586112	3.27726
160	-0.626346	3.32991	0.269711	0.118713	-1.01527	-0.216067	-0.371536	1.03215	2.47856	5.04454	1.02768	-0.194709	-0.166396	1.33117	-0.281135	-3.79185	0.0591079	0.0153979	2.70009	0.202656	1.09673	-0.682473	1.06742	-0.657638	0.929832	0.402828	1.54674	-1.40766	6.35187	0.924865	-0.00248359	-0.415246	3.34084
162	-0.51707	3.25292	0.967085	-1.39624	-0.262757	0.295043	-1.00434	0.738104	0.575682	4.08093	0.490745	0.507136	-1.17272	1.2671	-1.36147	-4.29203	0.0362595	0.0680486	2.22127	0.139574	1.01974	-0.566741	1.19408	0.271201	-0.293056	-0.194709	1.15236	-1.44045	4.83493	0.901024	-0.871718	-0.286102	3.30607
164	-0.801186	3.74268	1.6287	-0.850856	0.762443	1.14938	-1.19358	0.784795	-0.902514	3.34531	-0.30299	0.681976	-1.13895	1.16974	-1.96149	-4.29104	0.552833	0.59406	2.24064	0.55929	1.38233	-0.102321	1.34508	1.47323	0.0591079	-0.676016	0.875195	-1.31279	3.62098	-0.390907	-0.839929	-0.401338	3.22213
166	-1.01278	4.60049	1.57704	0.868738	0.920892	0.698368	-1.16825	0.700851	-1.83483	2.67178	-0.730654	0.221531	-0.348687	1.12404	-1.85271	-4.3571	0.916421	0.840922	2.23319	0.823538	1.59641	0.113249	1.12255	1.00931	1.00285	-1.03166	0.601014	-0.684957	2.72195	-1.06742	0.163416	-0.604987	3.03537
168	-0.802676	5.55615	1.67588	1.29839	0.885129	0.588099	-1.04109	0.867744	-2.23368	2.22425	-1.22686	0.769397	0.637273	1.0406	-1.89145	-4.42415	1.12603	0.869234	2.21332	1.02868	1.70916	0.196199	1.35452	0.459949	1.39078	-1.20054	0.535945	0.124673	2.19742	-0.567734	0.505646	-0.574688	3.01798
170	-0.345707	5.72751	1.99676	0.427167	0.630816	0.921388	-1.1603	0.911951	-2.57492	1.73102	-1.14242	1.7787	0.924865	0.954171	-2.38468	-4.45793	1.15087	0.881155	2.06431	1.12603	1.74691	0.225008	1.65651	0.219544	1.48018	-1.58797	0.403821	0.20961	1.66545	0.397861	0.657141	-0.317395	3.43124
172	-0.210106	4.7341	1.96447	0.324845	0.133614	0.94374	-1.42107	0.653664	-3.45409	1.04159	-0.710289	1.57058	-0.249346	1.48465	-2.53469	-4.46836	1.21494	1.08878	1.81645	1.21444	1.78913	0.271698	1.38779	-0.038743	2.23716	-2.42492	0.16888	-0.236928	0.658135	0.433624	0.920892	-0.188251	4.00593
174	-0.518064	3.83407	1.27405	0.740091	-1.19309	0.886122	-1.79758	0.50813	-4.6129	0.567734	-0.259777	0.761449	0.0625849	1.7037	-2.10106	-4.42863	1.09822	1.04358	1.42107	1.05997	1.66297	-0.456969	1.03762	-0.332793	2.48949	-1.63714	0.0278155	-0.524521	-0.414252	1.50452	1.06245	-0.302494	4.1614
176	-0.670056	4.11073	0.594556	0.569721	-2.99017	2.00917	-2.11845	1.00086	-5.10961	0.858307	0.440081	0.702341	1.87457	0.664095	-1.57009	-3.95477	0.958641	0.721216	1.27753	0.780324	1.66595	-1.35601	1.85519	-0.831981	2.02854	0.694394	0.277658	-0.684957	-0.72966	3.49283	0.983973	-0.453989	3.92397
178	-0.477831	4.84735	0.941257	0.461439	-2.84215	3.26981	-1.86215	1.88301	-4.75844	1.73996	0.634293	1.30335	1.62969	0.108282	-1.38084	-3.12428	1.41164	0.857313	1.81894	1.04855	2.22425	-0.615418	3.17941	-0.270704	1.95156	1.79062	0.98447	-0.958145	-0.401338	2.8347	0.783304	-0.243386	3.90212
180	0.106295	5.48114	1.55717	0.680983	-0.608464	2.66482	-1.1156	2.32259	-4.11173	2.34743	0.325839	2.43932	1.01825	1.23233	-1.37786	-2.5928	2.0807	1.07984	2.50091	1.43399	2.90672	1.05848	3.5132	0.938773	1.84923	1.57009	1.58399	-0.941753	-0.0397365	1.43399	1.16924	-0.0670552	3.50724
182	0.739594	5.49257	1.70966	0.255307	2.75125	1.79062	-0.189245	2.639	-3.56883	2.07772	0.0754992	3.58075	0.990927	2.35389	-0.972052	-2.1706	2.6539	0.923375	3.03239	1.59591	3.57727	2.32508	3.49432	1.62621	0.898043	0.570715	2.08964	-0.710785	-0.145038	1.64658	2.35935	-0.544389	2.73883
184	0.34521	4.40031	1.7643	-0.888606	5.10116	2.09063	0.410279	2.90126	-3.75857	0.741581	0.346204	3.82264	0.108778	2.58585	-0.297526	-1.93765	3.05325	0.657638	3.27627	1.68135	4.00543	2.79049	3.76403	1.75436	-0.011921	-0.220537	2.21431	-0.930826	-1.21395	2.08269	3.40492	-0.965595	3.1804
186	-0.624855	3.45757	2.05686	-1.48515	3.83059	2.55903	0.379483	2.59181	-4.4927	-0.607967	0.781814	3.11186	0.412762	2.74976	0.0422199	-2.3375	3.00954	0.647207	3.05424	1.73599	3.83655	2.38915	3.5579	1.83284	0.306467	0.987947	1.65055	-0.997384	-2.47459	1.74393	3.2117	-0.665088	4.30644
188	-0.499686	3.81072	2.8193	-0.663102	1.64658	2.01762	0.341733	2.2158	-4.84834	-0.862777	1.18514	2.54363	2.1254	3.10143	0.371039	-2.69065	2.90523	1.13944	2.88089	1.99378	3.6334	2.14229	2.7592	2.84861	1.15881	3.17593	1.11957	-0.219047	-2.97825	0.700355	2.5635	-0.435611	4.26372
190	0.658135	5.10762	3.26683	1.41064	2.38717	1.00633	0.687937	2.45819	-4.64221	-0.635783	1.98632	1.79609	3.13024	2.94646	1.15285	-2.41051	3.23802	1.85221	3.10093	2.50588	3.92149	2.71102	2.49843	3.75708	1.94212	4.29153	0.89705	0.574191	-3.11385	0.603	2.5183	-0.867744	3.19978
192	1.19011	5.72155	2.79397	2.93255	4.75397	1.7643	1.36544	3.2723	-4.21007	-0.77039	2.10106	0.0700355	3.7392	1.98185	1.96596	-1.81794	3.99649	2.27392	3.63439	3.14017	4.57068	3.63588	3.57876	3.47495	2.90126	4.3566	0.878175	0.37998	-3.30806	2.19146	1.69774	-1.27902	2.64446
194	0.341237	4.96209	1.51445	1.75784	4.28855	3.64284	1.89344	3.79433	-4.09087	-1.44839	0.912448	-0.595053	3.82115	0.690917	2.13534	-1.42604	4.29203	1.88202	3.84102	3.20474	4.82599	3.9205	4.79072	2.4567	2.65688	3.96868	1.17868	-0.652671	-3.81122	3.05325	-0.112752	-1.20501	2.71648
196	-0.635783	4.43161	0.535448	-0.647704	0.12666	4.40528	1.99427	3.74268	-3.995	-1.87109	0.0461936	0.0968575	3.21666	-0.55035	2.08815	-1.14193	3.67761	1.03464	3.59714	2.51581	4.43707	3.14762	4.85381	1.57754	1.05848	3.64582	1.66843	-1.28746	-4.15593	3.80824	-1.28945	-1.04159	2.54661
198	-0.521541	5.24769	1.39078	-1.15534	-2.43882	3.90708	2.03302	3.68108	-3.40442	-1.25368	0.580649	0.187755	3.80824	-0.480811	2.47955	-0.758469	3.14862	0.747045	3.53356	2.13832	4.09087	2.20438	4.26024	1.44492	0.67999	3.16004	1.91083	-0.72072	-3.7541	6.14822	-1.6888	-1.3411	1.94559
200	0.154475	6.40651	3.09199	0.0302991	-0.137091	2.34892	2.35091	3.60012	-2.73983	-0.343223	1.59691	-0.264247	5.19206	0.900527	2.8049	-0.63628	3.18885	1.01725	3.70691	2.3062	4.05014	2.38021	3.52015	1.84228	1.43945	2.61267	1.70469	0.103811	-3.16004	5.83231	-1.14987	-1.72456	1.51992
202	0.277162	6.3479	4.06504	1.01229	3.39548	1.06345	3.23703	3.60608	-2.07921	0.385443	1.84774	-0.524521	4.54932	1.4777	3.03437	-0.699361	3.47644	1.31279	4.1912	2.55207	4.3874	3.97166	3.11633	2.46664	1.80006	3.36965	1.48714	-0.219047	-2.54363	1.69327	-0.206133	-1.50353	2.45571
204	-0.274181	5.18511	3.70592	1.04805	3.77943	1.64111	4.36008	4.07596	-1.09623	1.49856	1.32422	-0.493228	2.74628	0.633796	3.56982	-0.304977	3.63588	1.1906	4.93427	2.49892	4.85281	5.56012	3.65327	2.71151	1.56611	4.9457	1.73648	-1.32173	-1.45783	-1.18365	-0.453492	-1.18266	3.66817
206	-0.733634	4.44303	2.25852	0.136594	1.89642	2.31663	4.97699	4.48376	0.252326	2.96583	0.660618	0.220537	2.10206	0.509123	4.29004	0.345707	3.30905	0.444551	5.3669	1.95553	4.83443	5.85417	4.12812	2.50936	0.325839	5.49704	2.26746	-1.74691	0.000496674	-1.06543	-0.414252	-1.30236	2.85506
208	-0.412762	4.77582	1.35799	-0.388424	1.0098	2.44478	4.87218	4.50959	1.432	3.89665	0.890593	1.02172	2.65688	1.61628	4.65016	0.628829	2.88536	-0.0834465	5.30928	1.58797	4.51306	4.83245	4.02679	2.111	-0.0352661	5.18262	2.39064	-1.07586	1.07139	1.32223	0.130137	-1.69774	1.01328
210	0.0293056	4.33673	1.63615	-0.403325	1.59194	3.0602	4.38293	4.36803	1.90039	3.79384	1.50998	0.21557	3.5882	1.4623	4.12116	0.480314	2.58088	-0.263254	4.9755	1.44591	4.22051	3.44465	3.98358	1.41561	0.889599	4.33674	2.00421	-0.68595	1.25468	3.87828	-1.03166	-1.85966	1.23332
212	-0.59257	2.53965	1.69178	-1.26113	2.04792	3.02643	4.15444	4.0705	2.20637	3.51916	0.791748	-1.50502	3.43372	-0.0357628	3.49581	0.094374	2.03003	-0.936786	4.70877	0.81708	3.88225	3.10093	3.64582	0.405808	0.427663	3.62198	1.43945	-1.50204	1.38581	3.57727	-1.97987	-1.50651	3.50674
214	-1.67191	1.76231	1.23382	-2.18501	1.76728	2.02556	4.8394	4.12961	3.28819	4.40379	-0.225008	-2.39114	2.82973	-0.708302	4.11371	0.191728	1.72754	-1.62224	5.08179	0.243882	3.88771	4.25676	3.35127	-0.351171	-0.142058	4.74999	1.36346	-2.36382	2.65638	2.28534	-0.995398	-1.23829	4.60595
216	-1.94063	2.42094	0.562767	-2.4731	0.663102	1.00235	5.77917	4.48922	4.66158	6.05136	-0.122686	-2.41349	3.27776	0.0223517	5.3073	0.773867	1.63118	-1.87109	5.70764	-0.00149012	3.97066	5.39323	3.31054	-0.589589	0.254313	5.8805	1.94212	-2.41101	4.52052	2.58287	-0.260274	-1.44243	3.18239
218	-1.6734	3.0756	-0.67999	-2.53916	-0.55333	0.64373	5.95947	4.44253	5.57303	7.28518	-0.0710289	-1.96745	3.65525	1.00881	5.78215	0.900527	1.23084	-1.98732	5.82884	-0.308454	3.60856	5.26806	3.0006	-0.998874	0.283122	4.9457	2.1408	-2.50836	5.84175	3.22759	-1.06394	-1.61082	1.40369
220	-1.73847	3.42081	-1.35899	-2.49793	-0.497699	0.657141	5.73844	4.10279	6.6032	8.03371	-0.191728	-1.49111	3.28869	1.0401	5.97884	0.693401	0.820557	-1.96695	5.74539	-0.542402	3.18736	4.46488	2.52922	-1.30087	-0.419716	4.25279	1.67737	-2.86003	6.90271	3.80377	-1.87357	-1.44144	1.01676
222	-1.83284	4.48277	-0.450015	-2.01265	1.73648	0.793239	6.04391	4.21802	8.30839	8.88258	0.0188748	-1.2358	2.77062	0.484784	6.41098	0.822544	0.971556	-1.57207	6.15567	-0.25928	3.28273	4.45098	2.35538	-0.236432	-0.94076	5.07782	1.34607	-2.31862	8.44399	3.58125	-1.4628	-1.37389	1.3272
224	-1.82192	6.02702	0.665089	-1.25269	5.16772	1.56611	7.05123	5.03113	9.88593	9.80347	-0.272691	-1.35799	2.20189	0.0754992	6.69807	1.19358	1.69377	-0.993411	6.96133	0.441571	3.95725	5.7598	2.88238	1.4469	-0.145535	5.42949	1.38332	-1.25567	9.96391	1.84029	-1.75387	-1.68234	1.33167
226	-2.2163	6.03894	0.30001	-2.04841	6.02454	1.45584	7.57724	5.31127	10.3563	10.3186	-0.618895	-1.09921	1.92026	-0.196695	6.51628	1.1752	1.72754	-1.30335	7.18335	0.29405	4.14401	6.60966	3.1516	1.357	-0.055631	4.39833	1.10418	-1.27852	10.546	0.711779	-2.52575	-1.8388	1.14441
228	-2.67526	4.9899	-0.659128	-3.61651	4.0248	-0.579655	7.27127	4.69983	10.0176	10.5038	-0.588099	-0.402828	2.38965	-0.164906	6.11047	0.800689	0.823538	-2.20686	6.77456	-0.718236	3.52412	6.28283	2.41001	0.496705	-1.75337	3.67165	0.633299	-2.10504	10.623	0.345707	-1.64708	-1.57754	1.37885
230	-2.25107	4.89304	-0.69042	-2.7289	3.23256	-1.84427	6.95388	4.29402	9.72152	10.7174	-0.85334	-1.51743	3.23455	0.361602	5.82387	0.736117	0.545879	-2.16613	6.6479	-0.954668	3.27776	5.84722	1.59393	1.34806	-1.90636	4.02828	0.468393	-2.21382	10.8068	-0.395874	-0.803669	-1.45783	1.9153
232	-1.27753	5.48859	-0.379483	-1.40617	3.6632	-1.30634	6.81877	4.24335	9.77168	10.8624	-0.751515	-3.31402	3.54052	0.966589	5.79854	0.895063	0.81559	-1.70668	6.80983	-0.667075	3.4526	5.42104	1.20997	2.09411	-0.742575	4.27812	0.319878	-1.81148	11.0303	0.0228484	-0.535945	-1.64558	2.36233
234	-0.817577	6.01759	-0.265737	-2.43485	2.11845	-0.890593	6.47058	4.02977	9.42349	10.2659	-0.0193715	-3.69201	3.33637	0.102321	5.74142	0.667075	0.393887	-2.04742	6.59724	-1.11014	3.17295	4.58906	1.20948	0.586112	-1.21892	4.04318	0.160436	-1.92324	10.632	2.3221	-0.529985	-1.71562	2.49594
236	-0.64075	6.68913	0.169873	-3.34183	-1.15186	-0.0149012	5.94954	3.97017	8.58208	9.20693	0.0432134	-4.01884	3.19233	-1.86066	5.57403	0.241895	-0.117222	-2.33849	6.22571	-1.56413	2.78354	3.56982	1.95652	-0.897547	-1.78665	4.14302	0.167887	-1.88649	9.78857	3.52959	-2.43187	-1.59293	2.18699
238	-0.530978	6.91861	0.376999	-3.55939	-2.43137	0.408789	5.61873	3.8296	7.8852	8.51601	-0.584622	-3.22113	2.14179	-1.89592	5.50995	0.0188748	-0.316898	-2.41796	6.01014	-1.75834	2.58734	3.22709	2.26696	-0.697374	-2.08567	4.20709	0.248849	-1.52042	9.11206	1.46627	-3.71834	-1.40369	1.88251
240	-0.730654	6.20087	0.136097	-4.49518	-1.36644	-1.35998	5.39968	3.24647	7.41929	8.03769	-0.741581	-0.477334	1.18862	-0.587602	5.3972	0.0973543	-0.751515	-3.05325	5.69721	-2.27441	2.23915	3.44515	1.25666	-0.412762	-3.74665	3.82662	0.55631	-1.56313	8.53191	-1.0406	-1.89791	-1.30087	1.9302
242	-0.98894	5.24521	-0.159442	-5.08279	-2.16464	-2.82129	4.67747	2.58535	7.02242	7.18931	-0.419219	1.44094	2.49247	-0.469387	5.15878	0.0427166	-1.40518	-3.79235	5.16375	-2.8645	1.74741	2.88586	0.254313	-1.70171	-4.91887	4.11371	0.76443	-1.65502	7.87824	-0.637273	0.316401	-1.38084	2.04494
244	-0.957151	4.65264	-0.452002	-4.08292	-3.88175	-2.46664	3.83407	2.05785	6.54211	6.01063	-0.166396	1.01229	3.60856	-0.719229	4.8846	-0.621875	-1.7037	-3.74566	4.77334	-2.85854	1.48664	2.02159	-0.0476837	-3.3776	-3.5425	4.44601	0.245372	-1.51048	7.1461	1.58697	-0.140071	-1.41313	2.01116
246	-0.828505	4.48028	-0.0129144	-2.29627	-1.67141	-1.06196	4.14501	2.3062	6.28581	5.69075	-0.427663	-0.652671	2.57095	-0.958641	4.84486	-0.89258	-0.891586	-2.79645	5.16474	-1.8388	2.1706	2.71201	0.534455	-2.58038	-1.2219	3.91454	-0.157952	-1.65055	6.859	2.10603	-2.65936	-1.35402	2.15322
248	-0.931323	4.91142	0.546376	-1.9441	2.52922	-0.34223	5.03113	2.97576	5.93215	6.1055	-1.12404	-0.727673	1.57853	-1.5835	4.66555	-0.331799	0.180304	-2.17756	5.75731	-0.929336	3.13769	4.16636	1.36147	-0.525514	-1.15981	3.57976	0.243882	-2.11348	6.77705	0.474354	-2.9996	-1.45833	2.4726
250	-0.917911	6.12239	0.545879	-2.27292	3.66122	-0.654658	4.94371	2.94248	4.95215	6.00268	-0.620385	0.675519	2.01712	-1.23779	3.96371	-0.0109275	0.460446	-2.10305	5.64605	-0.787775	3.27478	4.23839	1.31677	0.103811	-1.71959	3.53058	0.490248	-2.07027	6.11494	-0.00198673	-0.725687	-1.62025	2.7443
252	-0.863274	7.15405	0.788768	-1.72555	2.19891	-0.441571	4.39187	2.65688	4.04567	5.44389	0.635286	1.04606	2.31316	-0.025332	3.41882	-0.240902	0.500182	-1.76181	5.30928	-0.669559	3.14911	3.73026	1.10616	0.103315	-1.2219	3.48737	0.21706	-1.66545	5.20994	0.758469	1.00384	-1.4469	3.05672
254	-0.834962	7.31995	1.11908	-1.7037	0.884632	0.721713	4.11024	2.80788	3.54201	4.79072	0.90003	0.563761	1.75585	0.185768	3.19084	-0.272195	0.77039	-1.42058	5.23279	-0.398854	3.36965	3.74715	1.80006	0.372032	-1.08182	3.28521	0.296533	-1.16477	4.46786	0.277658	0.545879	-1.21444	2.71499
256	-0.455479	7.47393	1.04705	-2.58187	0.327826	1.79907	3.91404	3.22312	3.13818	4.13756	0.695388	0.17335	1.66943	0.00198682	3.29316	0.279645	1.22686	-1.19905	5.15183	-0.0193715	3.76999	3.58025	2.71002	0.669062	-0.784794	2.72493	0.966589	-0.303487	3.80327	0.55333	-0.920892	-1.35998	1.71314
258	0.0372529	8.06749	1.28597	-2.96732	0.544886	1.45485	3.91106	3.41634	2.62012	3.3175	0.767907	0.192225	2.45223	0.59853	3.78986	0.64373	1.69923	-0.894566	4.99984	0.428657	4.09087	3.54101	2.93006	0.853837	-0.0988443	2.93156	1.46776	0.446538	2.83271	2.49098	-0.505149	-1.54724	1.2055
260	0.59853	8.46485	1.88301	-2.25355	0.734131	0.577172	3.89318	3.11484	1.57853	2.27441	1.4171	-0.301997	3.3016	0.813603	3.58323	0.29405	1.90834	-0.591079	4.7336	0.752012	4.21802	4.03424	2.70853	0.976523	0.292063	3.49482	1.36892	0.829995	1.53482	3.16352	0.3467	-1.38531	1.60833
262	1.32223	8.37197	2.0807	-1.29888	-0.202656	0.342727	3.74516	2.59479	0.590583	1.62025	2.22673	-1.55816	3.74069	0.374516	2.89679	-0.100334	1.87457	-0.47336	4.4172	0.826021	4.21703	4.31041	2.22872	0.743568	0.0263253	3.43174	1.38432	0.64522	0.657638	3.31899	-0.572701	-1.04507	2.6539
264	2.10057	9.13391	2.78652	-0.100334	0.358621	0.890096	4.22001	3.02295	0.68148	1.79311	2.51383	-1.69625	3.81569	0.419219	3.09497	0.303984	2.53369	0.187258	4.80811	1.43747	4.75397	4.91838	2.54363	1.53134	0.495712	3.50078	2.05984	0.545879	0.627339	3.75162	-1.58995	-1.18415	3.1665
266	2.53667	10.4298	4.1316	0.939767	4.03126	1.9898	4.99835	4.18623	1.11957	2.00868	2.05835	-0.938276	3.28968	0.708799	3.26087	1.17669	3.84301	1.29292	5.5929	2.6226	5.72503	6.1959	3.80923	4.01686	1.93318	3.59714	2.90573	1.30783	0.634789	2.26001	-1.73002	-1.71065	2.58237
268	2.32905	10.3916	4.4783	0.596046	6.00467	2.06083	5.03262	4.25478	0.64671	1.51694	0.845393	-0.466903	2.22524	0.89407	2.80241	1.39425	4.20908	1.51694	5.57999	2.91417	5.87652	6.67721	3.92497	5.16971	1.97192	3.33836	3.28074	1.83185	-0.0223518	-0.64373	-1.40419	-1.58747	2.36233
270	1.82887	9.56108	3.65824	-0.763933	2.79198	0.807643	4.53691	3.32693	-0.184774	0.899037	-0.119209	0.43114	2.02457	1.34806	2.99265	1.12603	3.28471	0.697374	4.90298	1.97987	5.13345	5.88944	2.7443	3.33289	0.330806	3.14713	3.19332	1.46131	-0.794729	-1.55171	-1.08927	-0.918905	2.95589
272	1.42107	9.11107	2.66333	-1.82887	-1.43051	-0.225007	3.94881	2.71151	-0.6482	0.578165	0.00248356	1.21742	2.99464	2.00719	3.36121	1.03762	2.12441	-0.369549	4.20113	0.810623	4.37299	4.7346	1.90536	0.436107	-0.990927	3.091	2.90821	0.7689	-1.33713	0.594556	-0.89854	-0.847379	2.93205
274	1.27852	9.14733	2.37872	-1.77026	-0.852843	-0.286599	3.63141	2.8645	-0.677506	0.616411	0.529985	2.10057	3.21617	2.5034	3.15607	1.16428	1.88202	-0.772874	4.04914	0.463426	4.2965	4.21355	2.11944	-0.545879	-1.21395	2.98868	2.64893	0.411272	-1.46876	2.93106	0.694891	-1.36495	2.40157
276	1.2964	9.01719	2.61068	-1.62969	3.19233	0.486771	3.97811	3.75261	-0.146031	1.18663	0.992914	3.53158	2.02407	2.10901	3.2564	1.57505	2.60472	-0.477334	4.76539	0.93927	5.0361	4.51555	3.2718	0.766416	-1.10765	2.8491	2.76615	0.452499	-0.881652	4.08838	2.28584	-1.46975	2.53419
278	1.67837	8.92132	2.5784	-1.08182	5.17219	2.63949	4.49667	4.7192	0.419716	1.79509	1.36445	2.51134	1.0853	1.3724	3.80079	1.96149	3.44366	0.238419	5.67486	1.69178	5.84523	4.9293	4.64072	2.45273	0.492235	3.39597	2.98272	0.976026	-0.276665	3.43422	0.468393	-1.1459	2.47012
280	1.9441	9.3177	2.47608	0.811617	3.86933	4.8702	4.64569	5.126	0.615418	2.16812	1.30137	-0.780324	1.27455	1.38332	3.98705	2.08765	3.68158	0.916421	6.09209	2.12143	6.06378	4.86026	5.12153	3.44018	2.82774	3.93838	3.01749	1.34061	-0.197689	0.793238	-2.32359	-1.10815	1.80503
282	1.16626	9.49651	1.87655	1.49757	2.03302	4.40776	4.66059	4.92235	0.94225	2.42392	0.997384	-2.01315	1.87059	1.81546	3.87828	2.1264	3.06318	0.422696	5.94258	1.48863	5.62867	4.46339	4.30296	2.78354	2.16862	3.39697	3.14067	0.367562	-0.16888	-0.311434	-1.83483	-1.30534	1.75486
284	-0.00347691	9.04103	0.435114	0.00943737	1.62572	2.36034	5.01126	4.55628	1.89294	2.61913	0.514587	-0.834465	2.46863	2.14626	4.1306	2.05288	2.15471	-0.965595	5.7593	0.225008	5.04553	4.30892	3.18587	0.676016	-0.398358	3.05424	3.23455	-1.26362	0.268718	1.34955	0.703831	-1.21991	2.48055
286	-1.01874	7.70936	-0.455479	-1.79559	2.4875	0.752509	5.44836	4.22299	2.78801	2.6678	-0.647704	-0.525514	2.07027	2.12044	4.27266	1.68333	1.46329	-2.05189	5.84374	-0.607967	4.65314	4.53492	2.44876	-0.690917	-1.42604	3.18338	2.82129	-2.52575	0.775854	1.5984	1.40319	-0.796219	3.53952
288	-1.73599	6.77059	0.21855	-2.80887	2.72145	-0.332296	5.85665	4.2359	3.22411	3.05772	-1.3416	-0.80963	1.23431	1.93616	4.22051	1.57009	1.24673	-2.34743	6.16511	-0.709295	4.50015	5.0048	2.16464	-0.261267	-0.881652	3.23107	2.28981	-3.09249	1.34557	-0.143051	0.0735124	-0.635286	4.45892
290	-1.70718	7.54048	1.05898	-2.94397	1.81844	-0.0576179	6.56148	5.18809	4.26273	4.46935	-0.388424	-0.940263	1.8542	1.39723	5.01821	2.4423	1.52191	-2.08765	7.00057	-0.462929	4.80115	5.44637	3.0155	0.330309	0.126163	3.51965	2.6385	-2.7438	2.75572	0.183781	-1.48167	-1.00881	4.54833
292	-1.23431	8.82844	0.354151	-3.18438	1.19458	0.634293	7.11878	6.03249	5.62569	5.63214	0.34372	-1.29094	3.19183	1.45932	5.83778	3.29018	1.46031	-2.08716	7.69794	-0.613928	5.01126	5.3068	3.8902	-0.310441	0.411769	3.468	3.43223	-1.96149	4.23789	1.68433	-1.69625	-1.35948	3.75112
294	-0.881155	9.5134	-1.03563	-3.97811	0.204643	-0.47634	6.77009	5.34654	5.98927	5.26508	-0.651677	-1.10318	3.31551	2.33948	5.41508	2.90722	0.500679	-2.64992	7.29909	-1.47273	4.32034	4.4018	2.95589	-1.09673	-0.996391	2.89778	3.37859	-1.31379	4.4321	0.85334	-0.587602	-1.26859	2.60224
296	-0.816584	9.5134	-1.2214	-4.19617	-1.65502	-0.918905	6.50485	4.76589	6.17305	4.92781	-1.61578	-1.58201	1.9605	1.4325	5.27302	2.44727	-0.283619	-2.98868	6.89477	-2.11547	3.68754	4.00792	2.23666	-1.10418	-2.18898	3.11832	2.9852	-0.864267	4.38541	-1.07288	-0.86079	-1.056	1.63168
298	-0.902017	9.20345	-0.08593	-3.23157	-2.23666	1.56214	7.48386	5.99871	7.37309	5.96742	-1.08331	-2.71549	1.65552	-0.906984	6.57588	3.21269	0.175337	-2.56946	7.80423	-1.69079	4.31836	5.06043	3.81321	-0.949701	-1.11908	4.93973	3.46849	-0.413756	5.33015	-0.629822	-3.11087	-1.30783	1.00483
300	-1.19905	8.79317	0.293056	-3.05474	-0.716249	3.09547	8.2612	6.99113	8.65211	7.05222	-0.727673	-2.00719	2.69959	-1.61628	7.4476	3.85493	0.573198	-2.49346	8.70228	-1.40568	4.91242	5.6843	4.80264	-1.2666	-0.664095	6.48896	3.89417	-0.608961	6.37472	1.33266	-4.1614	-1.68284	0.702341
302	-2.07573	7.90606	-0.636279	-4.51505	0.817577	0.983973	7.63734	6.26296	8.97497	7.51168	-1.65949	-0.0422199	2.4125	-0.418723	6.73681	3.46949	-0.224511	-3.30905	8.36203	-2.28783	4.27167	4.78625	3.26832	-1.5373	-2.90175	5.07534	3.38654	-2.0956	6.86844	0.430643	-2.80042	-1.37985	1.29491
304	-2.80837	6.95189	-1.23431	-5.20696	0.609954	-1.40468	6.84261	5.63512	8.78424	8.02477	-1.98483	0.618398	0.899037	0.740091	6.14921	3.36319	-0.987947	-3.89566	7.96566	-3.10391	3.57628	3.94384	2.00669	-1.67439	-4.44253	2.78801	3.26981	-3.33687	7.2812	-2.31614	-1.38134	-0.836452	2.28584
306	-2.30571	6.86646	-1.4017	-4.6139	-1.4474	-1.16279	6.6191	6.13282	8.74946	8.24432	-1.61628	-0.0750025	0.513097	0.655154	6.59724	3.93291	-1.0709	-4.09832	8.13355	-3.21964	3.55045	3.46899	2.77112	-2.337	-3.7238	3.27379	3.86387	-2.89331	7.50174	-2.42343	-1.55071	-0.976026	2.01911
308	-1.2517	7.47542	-1.66496	-3.84351	-3.43968	-0.196199	6.34491	6.4219	8.63224	7.55837	-1.41611	-1.40121	1.71562	-0.0904004	6.62953	3.99748	-1.23183	-4.38938	8.03123	-3.3617	3.38256	2.63105	3.47992	-2.80142	-2.68718	4.04269	3.87083	-1.88351	7.12425	0.0809629	-3.12626	-1.48664	1.19756
310	-0.948707	8.08984	-2.2158	-3.18487	-3.11832	-0.869731	5.96792	5.78264	8.2771	6.76314	-0.608464	-2.43882	2.94993	-0.827511	5.94755	3.33587	-1.72704	-4.6437	7.53701	-3.80725	2.85755	2.03103	2.77857	-3.43174	-2.41498	3.1968	3.04431	-1.74244	6.75221	3.27329	-3.51369	-1.57605	1.31776
312	-1.42157	8.10723	-2.63105	-3.16848	-1.25617	-1.65055	5.98232	5.27402	8.28058	6.86198	-0.638763	-3.08454	2.51631	-1.00931	5.66939	2.9852	-1.92672	-4.66754	7.33137	-4.06653	2.66333	2.41001	2.15073	-3.71734	-2.32508	2.92758	2.63353	-2.58088	7.05222	3.07262	-2.77013	-1.22686	2.05288
314	-1.96894	7.5529	-2.35091	-4.09484	0.099341	-1.6282	6.23961	5.37237	8.85576	7.53005	-2.24163	-3.20971	0.172357	-0.0561277	5.70069	3.25193	-1.70817	-4.68393	7.5087	-4.01686	2.85953	3.34084	2.16266	-2.53022	-2.81334	3.13471	2.94844	-3.62694	7.73271	-1.64807	-1.83483	-0.975033	3.15358
316	-2.41746	7.10835	-2.41448	-5.5328	-0.347197	-2.91367	5.92122	5.00133	9.06636	7.57078	-3.65178	-2.03053	-2.0509	1.01477	5.47916	3.29663	-2.09411	-5.36044	7.22557	-4.54436	2.49247	3.39299	1.55767	-2.43336	-4.84586	2.2913	2.83271	-4.14103	7.81467	-4.16338	0.541906	-1.0704	3.76503
318	-3.08553	7.28269	-3.04828	-6.23067	-1.10368	-3.46502	5.2919	4.4172	8.54135	7.00802	-3.99401	-0.998378	-2.60721	1.23084	5.51343	3.20971	-2.59727	-5.89242	6.67175	-4.975	1.99477	2.68122	1.13249	-3.69896	-5.52783	1.48018	2.40058	-4.25826	7.1908	-1.72555	0.841419	-1.01427	3.50525
320	-3.61254	7.98504	-3.30458	-5.3371	-0.659128	-1.19011	5.24521	4.63724	7.97113	6.75321	-3.35375	-1.08679	-1.87506	0.403821	5.83927	3.44018	-2.17656	-5.24869	6.77059	-4.30594	2.30273	2.42889	2.15719	-3.85642	-3.84847	2.11944	2.57492	-4.39038	6.7999	0.780324	-1.99676	-0.617405	3.47048
322	-3.38902	8.45939	-3.40044	-4.01835	-0.788271	0.879169	5.32418	4.97103	7.34627	6.59476	-2.78354	-2.28435	-0.855327	-0.785788	5.51989	3.44714	-1.67886	-4.56323	6.89626	-3.67463	2.58138	2.54462	3.09696	-3.17494	-2.61019	3.0304	3.12875	-4.28061	6.57042	-0.372032	-4.50363	-0.512103	3.57082
324	-2.58237	8.9859	-2.91516	-3.23703	-1.63118	1.54475	5.2159	4.86275	6.75023	6.3926	-2.46366	-3.37362	0.531971	-0.998378	4.76042	3.17246	-1.51098	-4.2821	6.65536	-3.44018	2.53469	2.79347	3.00258	-2.1855	-1.81099	3.15855	3.58423	-3.49383	6.25352	-3.01798	-5.61972	-0.766416	3.75311
326	-2.11249	9.43094	-2.49694	-3.6781	-2.39511	0.326832	4.81158	4.15742	6.27985	5.94209	-1.8701	-2.54263	1.83682	-0.520547	4.24385	2.76168	-1.78516	-4.40478	6.14027	-3.64234	2.13335	2.75572	2.13981	-2.39809	-2.08467	2.27938	3.55194	-2.68916	5.75582	-2.99662	-4.70479	-0.85781	4.28557
328	-2.26647	9.16322	-3.89467	-5.43793	-4.10179	-2.34346	3.79483	2.85457	5.5035	4.84238	-1.52141	-1.28448	1.45386	-0.499686	3.88424	2.11696	-2.89232	-5.32269	5.08875	-4.75893	1.0401	1.88748	0.658631	-5.17716	-3.8301	1.37538	2.91715	-2.55257	4.82053	-0.0258286	-3.1958	-0.706315	4.58956
330	-2.27491	9.05345	-5.13544	-6.42389	-5.68479	-3.21716	3.19928	2.22574	4.97798	4.04815	-2.02258	-0.7237	-0.209113	-0.725686	3.85692	1.92225	-3.53009	-5.91228	4.34071	-5.46674	0.366569	1.20898	0.0551343	-7.16001	-4.39783	1.38382	2.65936	-2.68072	4.24236	1.4022	-3.19282	-0.781318	4.52697
332	-2.00818	9.31571	-4.2667	-5.76278	-5.83728	-2.85655	3.29812	2.11646	4.83145	3.66171	-2.56995	-0.670552	-1.67141	0.0466903	4.16686	1.884	-3.34332	-5.69771	4.06057	-5.23776	0.288586	0.972549	0.0620882	-6.49194	-3.6786	1.23729	2.63254	-2.86202	4.06156	-0.123183	-3.62347	-1.08083	4.30445
334	-1.93367	9.63509	-2.30024	-4.59055	-5.35647	-3.80228	3.06666	1.4618	4.25627	2.9395	-2.14279	-1.0396	-1.99825	1.2666	4.21057	1.35352	-3.3771	-5.25663	3.52611	-4.98494	-0.0233451	0.487268	-0.626345	-4.76738	-3.71287	1.00682	2.06729	-3.0299	3.45459	-1.84377	-1.84526	-1.01328	4.16537
336	-2.01017	9.99322	-0.503659	-3.76801	-4.35263	-4.21355	2.58237	1.26163	3.57876	2.75373	-1.45286	-1.21792	-1.90487	1.21892	3.7834	1.28299	-3.30905	-4.66059	3.2564	-4.65016	0.0114242	0.319878	-0.528991	-2.92162	-4.24137	1.27951	2.00371	-2.88089	2.98917	-2.80241	0.352164	-0.626345	4.51009
338	-1.60138	10.48	-0.0923871	-3.44465	-3.48389	-2.21829	2.04494	1.96199	2.93503	3.03537	-1.20054	-2.01017	-1.48465	-0.144541	3.30408	1.90685	-2.90026	-4.19567	3.34779	-4.23193	0.446041	0.258784	1.02123	-2.63055	-3.60409	1.52936	2.8342	-2.26001	2.67575	-1.84476	-1.53432	-0.618398	4.88162
340	-0.718236	11.0696	-1.22289	-4.12365	-3.85195	-0.623365	1.43945	2.24859	2.25157	3.02941	-1.43896	-2.15322	0.162919	-0.840922	3.35276	2.34296	-2.91169	-4.47581	3.06219	-4.37101	0.38743	-0.369052	1.64857	-4.3874	-2.94149	1.48813	3.3627	-1.46429	2.24163	0.483294	-3.77794	-1.07537	5.22534
342	-0.38594	10.9603	-2.22772	-5.53975	-4.1306	-1.78764	1.40816	1.7792	2.16514	3.30657	-2.34594	-0.34819	0.954171	0.432134	3.85841	2.37972	-3.25938	-5.02914	2.66284	-4.79718	0.0317892	-0.434617	0.290573	-4.95613	-4.05361	1.35054	3.1655	-1.34061	2.43584	0.473857	-1.67787	-1.11908	6.73681
344	-0.904997	10.1909	-2.59578	-5.96046	-3.22213	-3.35823	1.80354	1.40121	2.21928	3.77148	-3.31948	0.498692	-0.560284	1.67737	4.23888	2.29577	-3.39846	-5.07583	2.52426	-4.82102	-0.0953674	0.376006	-0.876188	-4.16438	-4.69933	1.9148	2.8789	-1.93516	2.83569	-1.48416	0.565747	-0.532468	8.2766
346	-1.60187	9.64254	-2.75125	-5.14934	-1.99825	-2.58535	1.74145	1.55121	1.75188	3.67016	-3.03785	-0.982483	-1.78268	1.46677	4.04219	2.30769	-3.25988	-4.79172	2.45372	-4.5235	-0.140567	0.68893	-0.47634	-4.58658	-3.05076	2.54611	2.78701	-2.48154	2.56449	-1.64459	-0.97851	-0.238915	8.08587
348	-1.9754	9.83626	-2.1716	-4.17034	-0.98894	-0.618895	1.72108	2.17259	1.44094	3.43968	-2.22077	-2.28683	-1.19507	1.27802	3.87381	2.70555	-2.81582	-4.47929	2.66234	-4.01189	0.0625848	0.98745	0.742078	-4.6591	-1.42952	1.98732	3.00507	-2.52078	2.2014	-1.95255	-3.19233	-0.629822	7.49131
350	-2.22971	10.5451	-1.96894	-4.46687	-2.37872	-0.612438	1.8845	2.487	1.41263	3.6791	-2.09957	-1.20501	-0.800192	1.58946	4.06901	3.04083	-2.96185	-4.81705	2.71847	-4.19319	-0.00794729	1.1459	1.22537	-4.59204	-2.5774	1.33912	3.24746	-2.45025	2.21829	-2.8953	-2.32806	-1.07934	7.32243
352	-2.63254	10.7288	-2.82774	-5.71211	-5.28246	-2.11795	1.55419	2.26398	1.18762	4.16388	-2.12143	0.844399	-1.11262	0.845889	3.98954	3.06318	-3.81321	-5.58794	2.33402	-5.17617	-0.56227	0.227988	0.714759	-5.29587	-4.75397	1.78417	3.22213	-2.84861	2.33352	-1.73996	-0.719726	-0.998378	7.39843
354	-2.86947	10.6081	-3.06815	-4.95613	-4.55578	-2.40207	1.44194	2.39164	1.22587	4.86374	-2.60274	0.149012	-0.863771	-0.0759959	3.74566	3.33736	-3.71685	-5.17418	2.4115	-5.0197	-0.417729	-0.0784794	0.56227	-4.55379	-3.88026	2.53469	3.34134	-3.35077	2.70009	-1.59293	-1.78814	-0.663102	8.01086
356	-2.69612	10.7591	-2.76963	-3.22312	-2.81781	-2.59131	1.76827	2.55903	1.66545	5.46972	-3.38753	-1.659	0.161429	0.729163	3.95874	3.65525	-3.27478	-4.447	2.68519	-4.39038	-0.119706	0.34074	0.340243	-3.72877	-2.19494	3.09149	3.59466	-3.55889	3.20474	-2.76417	-1.93119	-0.625849	8.9854
358	-2.2168	10.5868	-2.81086	-3.59466	-3.82761	-3.58572	1.75089	2.19345	1.77026	5.27451	-3.5271	-1.42703	0.603497	0.986954	4.06702	3.46253	-3.7834	-4.91738	2.32458	-4.81407	-0.627836	0.152489	-0.304977	-4.18971	-3.0905	3.1054	3.46998	-3.60509	3.01947	-3.10689	-0.233948	-0.867744	9.80993
360	-1.99477	9.91176	-2.6077	-4.41819	-4.58707	-2.51979	1.63217	2.18103	1.55369	4.67449	-2.84165	-1.69675	-0.377496	-0.962615	3.90907	3.21915	-4.08838	-5.32369	2.0499	-5.07484	-0.846883	0.0819564	0.42667	-4.09087	-3.59863	2.26349	3.04381	-3.70344	2.39809	-2.74032	-1.7638	-1.0709	10.709
362	-2.46912	9.78162	-3.04778	-4.21355	-5.07583	-0.43114	1.42008	2.61168	1.52389	4.34866	-1.88748	-2.68072	-0.835458	-2.40803	4.09633	3.35177	-4.10974	-5.33809	2.01414	-5.08875	-0.812113	-0.242889	1.81844	-4.49916	-2.8789	1.72158	2.78453	-3.86288	2.1413	-0.994404	-4.6283	-1.14689	11.1481
364	-2.52624	10.9076	-4.50313	-3.844	-5.56459	-1.04606	0.957648	2.52128	1.72307	4.49866	-1.70668	-1.75138	-0.0610948	-0.98298	4.37299	3.69052	-4.71622	-5.72652	1.60088	-5.66393	-1.40021	-1.21146	1.51743	-6.11395	-3.31104	1.51445	3.0751	-3.06467	2.26647	0.690917	-3.62595	-1.24623	9.92219
366	-1.75685	11.984	-4.69039	-3.48787	-4.16835	-2.60472	1.24375	2.41747	2.3211	5.04255	-2.13434	-0.634789	-0.0516574	1.21395	4.73062	4.0551	-4.85977	-5.8045	1.55022	-5.7444	-1.68582	-0.814597	0.609954	-6.33001	-3.69449	1.80503	3.84549	-1.45833	2.74032	0.700355	-0.769893	-1.24623	9.09666
368	-1.3416	11.9006	-3.31302	-3.53406	-3.57479	-2.3976	1.99328	2.65141	2.84215	5.50002	-2.28683	-1.42952	-0.77337	1.52439	5.20547	4.09832	-4.45992	-5.3823	1.90735	-5.28047	-1.42157	0.433127	0.497699	-4.71324	-2.70108	3.1804	4.08391	-0.883142	3.19928	-0.880659	-0.118713	-0.884136	10.6091
370	-1.34458	11.6775	-2.5178	-4.64916	-6.11593	-1.68085	1.88003	2.54313	2.86301	5.36541	-1.90487	-1.78566	-0.508626	0.756482	5.37783	3.69847	-4.80711	-5.40614	1.75039	-5.45532	-1.65204	0.140071	0.410279	-3.86288	-2.63651	4.35611	3.44714	-1.45535	3.11832	-3.03735	-1.11163	-0.618895	12.4981
372	-1.24971	12.1931	-2.82228	-6.28283	-9.32564	-2.12739	1.27206	2.13285	2.96285	4.71771	-1.02768	-0.25779	0.892579	-0.183781	5.34306	3.37263	-5.87801	-6.23167	1.25617	-6.3916	-2.44975	-1.19557	0.0774861	-5.31723	-4.5225	4.43757	2.89679	-1.95603	2.73436	-2.31365	-1.87953	-0.910958	12.7812
374	-1.2969	12.3928	-2.79198	-6.98119	-8.33124	-3.39846	1.41213	2.11895	3.5887	4.46936	-0.690917	0.839432	1.90983	-0.698368	5.43694	3.49532	-6.27339	-6.70652	1.41164	-6.78251	-2.71897	-1.32819	-0.0759959	-6.23614	-5.84424	3.6632	2.99166	-2.20686	2.81781	-0.219544	-1.98533	-1.39922	12.5999
376	-1.5532	11.38	-1.99229	-6.20584	-2.04543	-3.74516	2.3663	2.67178	4.47879	5.01126	-1.80105	-0.30299	1.02868	0.245372	5.68479	3.89963	-5.37783	-6.12785	2.37425	-6.00219	-1.93318	0.371039	0.316898	-5.05249	-4.90546	2.89381	3.53356	-2.70257	3.51121	-1.55022	-1.71661	-1.32521	13.7071
378	-1.9446	10.4999	-1.29739	-5.1712	2.91417	-2.45919	3.26683	3.39349	5.35101	5.79904	-2.789	-2.22325	-0.914435	1.809	6.01709	4.28011	-4.33127	-5.39571	3.34432	-5.13395	-0.946224	2.08467	1.1916	-4.09881	-3.14265	2.77807	4.02381	-3.53406	4.4028	-3.93142	-2.40902	-0.700851	15.4977
380	-2.50936	10.9931	-1.27008	-4.9149	1.00831	-1.5532	3.5728	3.69648	5.75135	6.32604	-2.56201	-2.68618	-1.33961	2.01464	6.29127	4.3869	-4.47035	-5.38329	3.5728	-5.30432	-0.901024	2.01265	1.52389	-4.52052	-2.72244	2.83172	3.93788	-4.13458	4.94768	-3.72032	-3.05027	-0.459949	16.2482
382	-2.67228	12.3347	-1.98185	-4.93228	-3.90609	-2.35041	3.57231	3.47942	5.66741	6.49244	-1.98434	-1.54773	0.406802	1.08182	6.62208	4.22597	-5.44389	-5.9252	3.2117	-6.11643	-1.63267	0.865261	0.910461	-5.3068	-3.55343	2.68767	3.55045	-3.6488	5.01523	-1.58201	-1.7186	-1.00782	15.4148
384	-2.25256	12.9039	-2.56598	-4.82599	-5.276	-2.80092	3.86536	3.46651	5.77917	6.73582	-1.9903	-0.834465	1.74741	0.278155	6.93301	4.16239	-5.87205	-6.2272	3.18984	-6.41346	-1.86612	0.586609	0.673036	-4.53889	-4.00295	2.82228	3.46154	-2.90076	5.27799	-0.852346	-1.18663	-1.4618	14.7223
386	-1.78814	11.6974	-2.76367	-4.95613	-4.35164	-2.56747	4.03325	3.69946	6.10997	7.07755	-2.17706	-1.61628	1.48167	-0.68595	6.88533	4.14699	-5.82437	-6.25451	3.47346	-6.32356	-1.73499	1.01725	0.918408	-3.70791	-3.98904	3.64184	3.56535	-3.09547	5.76079	-0.792742	-3.06318	-1.41164	15.2916
388	-1.46776	10.6553	-3.4829	-5.36144	-5.38876	-3.39001	3.71933	3.55889	6.39657	7.10587	-1.7936	-1.99477	0.987947	-0.796219	6.74526	3.95725	-6.09358	-6.47058	3.41634	-6.59674	-2.05338	1.02868	0.47187	-4.83443	-4.41223	4.24534	3.52363	-3.36369	5.99275	0.802179	-3.72678	-1.35601	16.0833
390	-1.09871	11.4193	-4.11719	-5.02616	-6.58532	-3.84798	3.73522	3.48091	6.82722	6.80188	-1.18166	-1.51843	0.799696	0.576178	7.12971	3.8445	-5.98977	-6.33349	3.50972	-6.5277	-2.11447	1.06941	0.150005	-5.35498	-4.41472	4.25925	3.50773	-2.67029	5.98331	1.47621	-2.11149	-1.50104	16.5428
392	-0.433127	13.1369	-3.68903	-3.3468	-5.55863	-2.04593	4.37399	3.9503	7.32144	6.47902	-0.676016	-2.36382	1.08033	1.51048	8.02875	3.88374	-5.06441	-5.37435	4.1455	-5.61426	-1.33365	1.53035	1.06543	-4.20958	-2.88486	4.78476	3.51121	-1.4921	5.96046	1.73897	-2.3062	-1.6878	16.6307
394	-0.155965	14.1308	-2.94497	-2.73039	-3.52412	-0.582139	4.69585	4.04467	7.50571	6.09656	-0.910461	-2.94199	1.46578	1.11063	8.41916	3.58969	-4.66605	-4.87417	4.42266	-5.24769	-0.839929	1.69228	1.6734	-3.30408	-2.40505	5.53727	3.3011	-1.05848	5.92619	1.66446	-3.20027	-1.508	16.5527
396	-0.571708	14.1263	-2.41896	-4.19368	-1.40816	-1.44641	4.45743	3.53555	7.33783	5.83033	-1.81099	-1.4027	1.00036	0.289083	8.0059	3.14464	-5.13842	-5.34455	4.13855	-5.82784	-1.1161	1.74294	0.98745	-3.24994	-4.20461	5.20051	3.12626	-1.51545	5.85069	-0.724196	-2.08865	-1.14689	16.8045
398	-0.463923	14.2182	-1.80602	-4.94371	-0.207623	-1.94112	4.48277	3.62595	7.29561	6.33746	-1.75734	-0.765423	0.51111	-0.22004	7.92444	3.27627	-5.2015	-5.53777	4.12911	-5.99672	-1.13497	2.34395	0.780324	-3.6036	-4.67946	4.85828	3.44217	-1.82192	6.20335	-1.62025	-1.97589	-1.34756	17.3296
400	0.122686	13.7404	-1.33812	-4.70032	-0.547369	-0.303984	4.79519	4.34816	7.23849	6.89775	-1.34508	-1.90785	1.01576	-0.55482	8.3223	3.65277	-4.71473	-5.30978	4.42266	-5.57552	-0.76294	2.95043	1.88599	-3.97315	-2.99513	5.67834	3.83407	-1.60535	6.54409	0.280142	-3.78042	-1.83086	18.6558
402	-0.00546379	12.3337	-1.6287	-5.05447	-2.09361	0.650684	4.61042	4.1614	6.64641	6.44277	-2.11845	-2.92013	1.80701	-0.447532	8.40227	3.37859	-4.85033	-5.47916	4.18623	-5.65549	-0.923375	2.6529	2.11895	-4.06206	-2.19544	6.38217	3.61601	-1.67986	6.11544	0.432134	-5.4275	-1.75387	20.7017
404	-0.135601	12.2041	-1.92424	-5.37733	-4.37101	-0.885129	4.08192	3.22859	6.12934	5.92669	-2.38915	-2.92311	2.43038	-0.204643	8.20408	2.98768	-5.65648	-5.71956	3.54002	-6.21031	-1.5383	1.75883	0.880162	-3.78092	-3.15011	6.17305	3.30855	-1.88748	5.83132	-0.805159	-5.51591	-1.38581	21.5297
406	0.50664	13.7905	-1.62025	-4.77533	-6.53515	-2.91616	3.54946	2.58684	5.90086	5.76923	-0.977019	-2.60323	3.56336	-0.481804	7.77145	2.97527	-6.21478	-5.57502	2.9847	-6.5436	-2.09957	0.84887	-0.236928	-3.91603	-3.89566	5.65747	3.25143	-1.60038	5.8189	1.13398	-4.29501	-1.58151	20.5537
408	1.13298	15.2911	-1.37736	-4.21604	-7.49479	-3.65327	2.94944	2.1413	5.35001	5.11458	-0.0735124	-2.29925	4.09633	-0.510116	6.9206	2.75969	-6.40005	-5.48661	2.56598	-6.66877	-2.4726	0.359615	-0.760456	-4.51009	-4.08689	5.12352	2.99315	-1.18415	5.10116	3.82016	-3.20226	-2.1264	19.448
410	1.27355	16.056	-1.14888	-4.02133	-6.04689	-3.06616	2.80241	2.00371	4.60496	4.39783	-0.814597	-2.25256	3.12527	0.0208616	6.37422	2.42293	-6.08762	-5.25067	2.47906	-6.33448	-2.33501	0.868241	-0.526508	-3.74615	-3.94384	4.57118	2.76963	-0.971556	4.12166	1.59989	-3.41982	-2.19941	20.1712
412	0.904997	16.0371	-1.1151	-4.53591	-3.72082	-2.68817	3.02494	1.99129	3.89268	3.92993	-1.2512	-3.31899	2.08368	0.111262	6.43631	2.31465	-5.70963	-5.14239	2.43733	-6.00119	-2.10951	1.5984	-0.0854334	-2.69959	-3.79036	4.19418	2.74281	-1.131	3.39299	-2.45124	-4.34717	-1.71264	22.4734
414	0.494222	15.9154	-1.48465	-6.36876	-2.24461	-2.91367	3.01351	1.86761	3.37611	3.56684	-0.643234	-3.65078	1.17769	-0.495712	6.35882	2.37872	-5.76824	-5.60184	2.21332	-6.20733	-2.17259	1.84774	0.0442068	-3.05027	-4.29253	3.80923	2.8044	-1.22686	3.01351	-3.50128	-4.22001	-1.53085	23.7192
416	0.527998	16.9372	-1.5979	-7.30604	-0.103315	-2.84463	3.00507	1.87457	3.37958	3.65525	0.000496705	-1.98235	0.223517	-0.393391	6.08861	2.59429	-5.65499	-5.73347	2.22524	-6.14077	-2.08765	2.24461	-0.0650683	-3.18488	-4.56025	2.92311	3.11285	-0.754496	3.22064	-1.90188	-2.69562	-1.90884	23.2756
418	0.263751	17.6271	-1.54376	-6.66132	2.8198	-2.57343	3.51717	1.99427	3.86288	4.04467	0.532965	-1.10219	-0.675519	0.315408	6.49293	2.82377	-5.16276	-5.39621	2.54015	-5.69473	-1.67837	3.17444	-0.227988	-2.87245	-4.15742	2.82824	3.60211	-0.807643	3.74566	0.329812	-1.55618	-1.89443	23.8548
420	-0.46889	16.2433	-1.60436	-5.97239	2.77956	-1.39475	4.27266	2.49793	4.36356	4.57366	0.374019	-3.00407	-1.02321	-0.021855	7.41233	3.21021	-4.70181	-5.1255	2.91665	-5.30928	-1.16775	3.73622	0.539422	-3.30905	-3.10938	4.72516	4.2518	-1.73301	4.31786	1.15633	-3.3627	-1.50253	25.8232
422	-0.702838	14.4288	-2.02755	-5.83579	-2.25206	-0.190735	4.1162	2.98818	4.4922	5.10265	-0.428657	-4.41869	0.716746	-0.726183	7.94729	3.70244	-4.9298	-5.31177	2.87195	-5.43545	-1.23481	2.54164	1.45584	-4.9	-2.6231	6.19541	4.93526	-2.31912	4.61986	1.66148	-5.76923	-1.61678	26.8723
424	-0.536442	13.4617	-2.98222	-6.72539	-8.01732	-1.66694	2.84712	2.43336	4.19219	5.23577	-0.303984	-2.53767	2.60373	-0.123183	7.87775	3.80973	-6.16014	-6.20335	2.0807	-6.46959	-2.21084	0.315905	0.563761	-6.72638	-4.83443	5.77122	5.0058	-2.57095	4.41124	4.17779	-4.13259	-2.0052	27.1887
426	-0.439088	13.2263	-3.04878	-7.14411	-8.82	-3.76999	1.81695	1.52191	3.63688	5.06441	0.114242	-0.333289	2.28484	0.822047	7.52856	3.47197	-6.94692	-6.64294	1.29193	-7.06712	-2.97775	-0.759463	-0.873208	-6.19094	-6.79592	5.01921	4.45396	-2.8049	3.86288	5.2919	-1.75635	-1.95603	27.7375
428	-0.3467	13.5899	-1.75089	-5.86907	-5.75582	-3.70195	1.57207	1.39376	2.88238	4.63923	-0.623862	-0.3467	1.59889	0.805656	7.10487	3.10888	-6.47704	-5.95053	1.06891	-6.47157	-2.84513	-0.690917	-0.820557	-3.73175	-5.66045	4.79966	4.06603	-2.54164	3.15756	2.53965	-2.111	-1.52489	28.7915
430	-0.290076	14.1571	-0.773867	-4.21107	-3.48389	-2.75274	1.73201	1.66943	2.12491	3.94334	-1.54922	-1.4777	1.4027	0.874698	6.63747	2.92361	-5.78662	-5.22286	1.15136	-5.76327	-2.4567	-0.299017	-0.0153979	-2.32855	-3.59664	4.40329	4.10477	-1.79559	2.42293	-0.681976	-2.74628	-1.17769	30.3075
432	-0.629326	14.243	-0.920892	-3.76602	-2.00272	-2.46465	2.43187	1.70122	1.78764	3.26633	-2.40405	-2.337	0.412265	1.85221	6.47753	2.91715	-5.427	-5.18858	1.39276	-5.50548	-2.10653	0.896553	0.144045	-2.27094	-2.92261	3.51667	4.20958	-1.56264	1.87407	-3.08951	-2.41399	-1.04556	31.5577
434	-1.51644	13.4617	-2.3519	-5.20547	-0.821054	-3.1655	2.82278	1.34657	1.56164	2.72095	-2.93851	-2.5774	-0.365078	2.39362	6.32256	2.84662	-5.66939	-6.09557	1.35799	-6.02156	-2.13683	1.78019	-0.474354	-3.48787	-4.17183	2.87741	4.0104	-2.62608	1.42753	-3.31352	-1.41313	-0.925859	32.1522
436	-1.77175	13.7702	-3.83357	-6.73831	-1.39574	-3.39349	2.16216	1.18762	1.26958	2.4572	-2.51631	-2.49892	0.354648	1.4469	5.84175	2.73436	-6.15964	-6.96282	1.06295	-6.72241	-2.46217	1.09226	-0.572205	-5.12848	-5.0649	2.85755	3.95477	-3.44068	1.13249	-0.415246	-1.76678	-0.802676	31.8229
438	-1.02123	15.8886	-3.68506	-7.15057	-3.63787	-2.67029	1.54823	1.61876	1.48068	2.71599	-1.79708	-1.93914	1.03265	0.527998	5.79258	2.90523	-6.2714	-7.02639	1.14689	-6.87589	-2.45919	0.0849366	0.194212	-5.4727	-5.23031	3.34432	4.23392	-2.82526	1.2959	1.40518	-2.79099	-0.888606	31.5646
440	-0.561277	17.4463	-2.88735	-7.03335	-5.90831	-1.9153	1.67439	2.13981	2.07027	3.32246	-1.12504	-1.05749	0.80814	0.738104	6.3921	3.39647	-6.27836	-7.07209	1.50601	-7.00255	-2.34743	-0.232458	0.693401	-5.23627	-5.44389	3.59068	4.46737	-2.0658	1.75188	1.12504	-2.57641	-1.42902	31.9516
442	-0.991921	17.5898	-2.62111	-6.68118	-6.14772	-1.6729	2.21481	2.43783	2.55307	3.97215	-1.21991	-0.220537	0.403325	1.00732	7.06812	4.01537	-6.30468	-7.2062	1.86016	-7.17789	-2.31663	0.146031	0.624855	-5.2308	-5.12898	3.63489	4.81854	-2.24759	2.26349	0.872215	-2.05537	-1.86066	32.4979
444	-2.03749	16.8284	-2.82029	-6.72589	-5.23925	-2.19991	2.58088	2.34743	2.43882	4.12116	-2.88039	-0.00695391	0.402331	0.989934	7.08501	4.11769	-6.33101	-7.28418	1.99328	-7.25687	-2.31167	0.76592	0.328322	-5.10265	-4.55528	4.10229	4.95911	-3.38604	2.32706	-0.700851	-1.84427	-1.432	33.8311
446	-2.3365	16.283	-3.22511	-7.03484	-6.48449	-2.28733	2.40505	2.32806	1.83831	3.87927	-4.08739	-1.1464	1.26014	0.885129	6.48598	3.95228	-6.46412	-7.44313	1.9302	-7.34776	-2.38468	0.402828	0.548859	-5.38826	-3.78937	4.51903	4.97798	-3.84003	1.86016	-1.83086	-2.48055	-1.0406	34.9104
448	-1.68929	16.2	-3.60211	-7.28468	-8.63175	-1.89443	2.14626	2.72493	1.68631	3.89814	-3.31501	-2.30322	1.88053	0.633796	6.4676	4.26571	-6.62655	-7.71036	2.0206	-7.51565	-2.32706	-0.565251	1.09275	-6.0906	-4.30147	4.50313	5.32617	-3.0602	1.66545	-0.842412	-2.61267	-1.41015	35.0475
450	-1.43598	15.6571	-4.6134	-7.25637	-8.17478	-2.42045	2.03053	2.62906	1.81993	3.71536	-2.28733	-2.74032	1.49757	1.23084	7.0105	4.38591	-6.77655	-7.94331	2.02209	-7.7188	-2.26349	-0.751515	0.490745	-6.13481	-5.70963	4.54634	5.40465	-2.73734	1.56313	-1.19656	-1.88003	-1.81645	35.4369
452	-1.54773	14.918	-6.51379	-6.76711	-6.61959	-3.33736	1.76479	2.10851	1.53432	3.28422	-2.17805	-3.16203	1.19259	1.95454	7.25438	3.9657	-6.9052	-7.90656	1.8085	-7.82311	-2.42591	-0.696381	-0.636776	-5.95897	-5.61625	5.48462	5.13196	-3.32594	1.18862	-2.44925	-1.83632	-1.76877	36.0246
454	-1.5681	14.5132	-7.44859	-7.20918	-5.38925	-3.2872	1.74095	2.33849	1.13249	3.41783	-2.52773	-2.93752	1.3873	1.30037	7.25587	3.94732	-6.72489	-7.69248	1.95156	-7.7347	-2.33452	-0.59704	-0.295043	-5.62519	-4.94421	6.18199	5.15183	-4.08242	0.98149	-1.96397	-2.80291	-1.46578	36.5734
456	-1.47223	14.4854	-5.99176	-8.81354	-2.14328	-2.93652	2.4721	3.13818	1.41164	4.12414	-2.9554	-2.14477	1.3565	1.10318	7.37707	4.3879	-6.06428	-7.4774	2.68668	-7.40737	-1.58052	0.558793	0.732144	-4.12514	-5.57005	5.33114	5.61327	-4.21206	1.32024	-1.28448	-2.89033	-1.32918	37.3359
458	-1.73847	14.6762	-3.10391	-9.06885	2.19295	-2.67327	3.86884	3.86188	2.47558	4.95464	-3.35028	-2.05884	0.948211	1.78615	7.75158	4.67747	-5.01821	-7.00454	3.74317	-6.65287	-0.481307	2.78453	1.2363	-2.26051	-6.19243	4.42266	6.03199	-3.95725	2.13683	-2.42889	-1.71711	-1.40021	38.2687
460	-2.36581	15.3502	-1.05053	-7.00255	1.99725	-1.131	4.87963	4.45942	3.618	5.59092	-2.83917	-2.95192	1.0709	1.33514	8.12163	4.76539	-4.2215	-6.30071	4.48227	-5.84473	0.198186	4.11272	1.86215	-2.59529	-4.69933	4.74999	6.04441	-3.87331	3.16252	-1.89493	-2.95043	-1.57257	38.6789
462	-2.81582	16.2636	-1.15981	-5.34058	-2.32061	0.038743	4.52896	4.52697	4.16736	5.80202	-1.55568	-3.95278	1.23183	0.310441	7.81367	4.53641	-4.4619	-6.18398	4.34766	-5.92818	-0.0228484	3.13669	2.15719	-4.5071	-3.24349	5.1563	5.67138	-3.93093	3.95924	0.596543	-5.41111	-1.76281	38.8319
464	-3.01252	16.2631	-2.05884	-6.19094	-4.98344	-0.695884	3.75112	4.32879	4.26571	5.90881	-0.970066	-3.95526	1.63217	-0.0283122	7.32789	4.28061	-5.20647	-6.83417	4.05709	-6.6479	-0.527998	1.56909	1.88549	-5.13097	-4.09583	4.82798	5.34604	-4.1306	4.35064	1.03166	-5.23279	-1.87407	39.7841
466	-2.72344	15.4302	-1.76082	-7.61549	-4.58459	-1.79261	4.01686	4.61489	4.52995	6.57191	-1.28597	-3.23703	3.03239	0.623862	7.70787	4.59651	-5.34356	-7.17044	4.47631	-6.86894	-0.438094	1.58201	1.7489	-4.0104	-5.12948	5.39074	5.60383	-4.21753	4.83791	0.234445	-2.89977	-1.92473	40.9394
468	-2.22325	14.7775	-1.27405	-7.55837	-3.50227	-2.19494	5.02318	5.18163	4.92086	7.46449	-1.92424	-3.17345	3.53704	1.59591	8.33869	5.05398	-4.93278	-6.87192	5.23975	-6.54459	0.0740092	2.80191	1.9302	-2.85904	-4.8553	6.44227	6.13083	-4.23491	5.45134	-0.613928	-1.18315	-1.78864	41.3164
470	-2.17557	14.3642	-2.46962	-7.06414	-4.99388	-1.88202	5.47767	5.4583	5.33412	7.84894	-2.15868	-4.51257	2.9241	1.91877	8.62032	5.02219	-5.02318	-6.93202	5.50995	-6.71099	0.135601	3.00457	2.19792	-4.04666	-4.44353	5.83728	6.31809	-4.65761	5.86162	0.426173	-2.29875	-1.52042	41.3954
472	-2.62161	14.2232	-4.10875	-6.82821	-6.89973	-1.66098	5.46426	5.37932	6.13829	7.90407	-1.95404	-5.88646	2.03798	2.12938	8.90493	4.77781	-5.5636	-7.41631	5.31425	-7.28965	-0.225008	2.29925	2.0509	-6.16113	-4.52697	4.76986	6.07024	-5.06689	6.40601	3.26087	-3.61453	-1.58548	41.5747
474	-2.59479	15.3765	-4.34717	-6.31263	-5.73248	-1.33614	5.85914	5.62668	7.46995	8.14597	-1.83086	-4.97649	1.47174	2.02656	9.29982	4.90944	-5.43495	-7.34776	5.58893	-7.16994	-0.0819565	2.60423	2.22027	-6.06179	-4.37846	4.90298	5.93414	-4.2056	7.45902	3.52909	-2.82178	-2.11	41.2375
476	-2.035	16.9014	-3.21716	-6.38614	-3.57578	-0.251333	6.65486	6.34988	8.71569	8.64665	-2.10603	-2.51631	2.06182	1.47571	9.62714	5.30332	-4.71522	-6.76165	6.41942	-6.43482	0.674029	3.81867	3.24796	-3.64135	-4.25627	5.67089	6.17156	-2.75125	8.55674	0.285109	-2.03997	-2.21332	41.2141
478	-2.02805	17.0926	-2.50886	-7.87626	-2.71648	0.186761	6.78301	6.43035	8.70178	8.8647	-2.75969	-1.23084	2.16116	1.4017	9.34253	5.12948	-4.6884	-6.785	6.63946	-6.41098	0.880659	4.19418	3.6026	-2.26349	-5.30531	5.6689	5.99623	-2.80241	8.669	-2.35885	-2.13534	-1.59641	42.3873
480	-2.35587	16.8795	-2.9405	-9.05097	-2.60274	-0.256797	6.16411	5.99672	7.85788	8.89947	-2.99613	-1.62423	0.783304	1.57406	9.01073	4.87218	-5.20746	-7.388	6.32803	-7.06017	0.471373	3.56038	3.14216	-3.13024	-6.24309	5.31127	5.86659	-3.96818	8.18421	-2.05388	-3.15557	-1.25865	43.9952
482	-2.42988	17.6763	-3.65426	-8.41767	-1.85668	-1.01477	5.75235	5.83629	7.67112	9.12348	-3.11732	-2.1408	-0.102818	1.90338	9.32862	5.24521	-5.45134	-7.6731	6.3464	-7.33286	0.227491	3.22461	2.65092	-3.9945	-5.90036	5.75831	6.68367	-4.4023	8.19117	-0.796715	-3.6031	-1.44293	45.4093
484	-2.22375	19.2642	-4.67946	-6.64592	-1.28895	-2.21729	5.56062	5.6684	8.1559	9.43989	-3.20176	-2.38667	0.931323	2.02507	9.42349	5.44637	-5.60482	-7.60108	6.34342	-7.34727	0.0695387	3.21021	1.98384	-4.89851	-5.10911	5.72056	7.51714	-3.82413	8.77033	1.02967	-2.48104	-1.62671	46.0158
486	-2.14428	20.2601	-5.34356	-6.2868	-2.12689	-3.32097	5.38379	5.19902	8.37843	9.52184	-2.83817	-2.3971	2.01464	1.32074	8.82844	4.90298	-5.9401	-7.70042	6.031	-7.60257	-0.237425	3.16848	1.23878	-5.86212	-5.39124	4.76887	7.32392	-3.2564	9.1667	2.52475	-1.44988	-1.42505	45.7868
488	-2.37525	19.8488	-4.64767	-7.68205	-2.99166	-2.97775	5.42452	4.94172	8.33025	9.32266	-2.46316	-2.35488	1.60982	0.786781	8.43207	4.43856	-6.02007	-7.80324	5.88844	-7.67708	-0.344713	3.20921	1.26113	-5.5934	-5.73695	4.86026	6.7845	-3.32246	9.17266	1.78864	-1.85023	-1.15087	45.4843
490	-2.3971	18.839	-3.23256	-8.07643	-3.04331	-1.3123	5.25216	5.20498	8.20905	9.18557	-2.23666	-2.96583	1.37289	0.860294	8.43257	4.6884	-5.59737	-7.55539	5.94209	-7.30455	-0.226994	2.6529	2.11	-4.64469	-4.30743	5.51989	6.90818	-3.7993	8.98838	0.330806	-3.49879	-1.4772	45.7351
492	-2.3822	17.9867	-2.73337	-7.39892	-2.41299	-1.05997	4.60545	5.2611	7.52856	8.67744	-2.84314	-3.75758	1.59343	0.757476	7.96864	4.9154	-5.54522	-7.62641	5.69373	-7.27822	-0.43412	1.75685	2.3663	-4.57913	-3.57529	4.60744	7.34925	-4.48326	8.19464	-0.527998	-4.13706	-1.89145	47.1443
494	-2.79993	17.0966	-3.36866	-7.35819	-0.781318	-2.49743	4.26869	4.83394	6.52075	7.90705	-3.9955	-4.24186	0.787775	1.05997	7.33634	4.55876	-5.82884	-8.02974	5.31971	-7.58668	-0.735621	1.8999	1.74095	-5.05795	-4.51952	2.80341	7.45654	-5.25266	7.16746	-1.33862	-3.62893	-1.49608	49.4679
496	-3.33985	16.502	-4.41621	-8.41369	-0.277162	-3.84251	4.34816	4.33127	5.98083	7.64926	-3.8445	-4.05411	0.0432134	1.70022	7.41134	4.05163	-6.08663	-8.43306	5.06043	-7.93537	-0.868738	2.40058	1.02371	-5.59489	-5.99672	2.29875	7.03285	-5.74837	6.78897	-0.894566	-2.91864	-0.845393	51.2098
498	-2.98818	17.5272	-4.8096	-9.01769	-1.48416	-3.6786	4.88112	4.64817	6.31412	7.94381	-2.55803	-2.89877	0.361105	1.40121	8.22097	4.35313	-5.83728	-8.28008	5.21888	-7.69049	-0.487765	2.74579	1.37289	-5.39025	-6.94195	4.09732	6.87738	-5.2616	7.1004	-0.0437101	-2.29081	-0.956655	51.2848
500	-1.90586	19.6437	-4.58062	-8.4574	-3.70244	-2.05735	5.15083	5.29985	6.52174	7.90308	-1.73648	-1.64708	1.21345	0.808636	8.83142	5.08279	-5.24372	-7.5986	5.42055	-6.94791	-0.0819561	2.54164	2.39114	-4.44502	-6.62257	5.91775	7.45654	-4.07795	7.11332	-0.0173847	-2.56449	-1.52737	50.6754
502	-1.40468	20.9356	-4.98692	-8.04961	-6.38266	-1.85072	4.05858	4.73013	5.52833	7.02838	-2.01811	-0.920892	2.48849	0.875195	8.39035	4.85977	-5.52336	-7.51515	4.65115	-7.08848	-0.792742	1.08182	2.07772	-4.84983	-6.55154	5.57005	7.74711	-3.1208	6.10799	1.21345	-2.79198	-1.63317	50.9674
504	-1.77075	20.6962	-4.75546	-7.63585	-6.55154	-3.07858	3.0905	3.89914	4.48922	6.46512	-3.19183	-1.58896	2.73883	0.567734	7.77642	4.26372	-5.92719	-7.50721	3.92248	-7.26084	-1.41313	0.375013	1.24375	-5.26557	-6.37869	5.19007	7.62294	-2.84264	5.10812	1.36594	-3.30557	-1.34955	52.6542
506	-2.59032	19.2111	-3.17047	-7.15156	-5.49207	-3.24994	3.05921	3.80576	4.11868	6.55154	-4.04716	-3.72281	1.44591	0.193715	7.59363	4.16636	-5.81841	-7.30207	3.89169	-6.95089	-1.26561	0.85036	1.10616	-4.63724	-5.40316	6.06527	7.45753	-3.54499	4.74552	-1.89145	-4.20163	-1.35899	54.8686
508	-3.36319	17.8903	-2.34246	-7.33336	-5.56856	-2.64347	2.92063	3.86884	3.78589	6.54062	-3.28471	-4.53591	0.630816	0.885626	7.26531	4.19915	-5.87503	-7.54346	3.83655	-7.07358	-1.19011	0.989934	1.15434	-5.08229	-5.28147	5.82933	7.17541	-4.45098	4.51952	-2.82675	-3.45459	-1.66496	56.1327
510	-3.43472	18.0185	-2.70108	-7.37359	-5.06888	-1.62969	3.04033	4.21007	3.52164	6.59376	-1.98384	-3.36518	0.617902	1.07735	7.17292	4.28061	-5.66145	-7.43916	4.12067	-6.92904	-0.854333	1.35899	1.77572	-5.79506	-5.53926	4.08391	7.49032	-4.22398	4.45545	0.869731	-2.68022	-1.76231	56.2971
512	-2.79993	18.6458	-2.69612	-7.00454	-3.32942	-0.746548	3.71337	4.68095	3.70493	6.88533	-2.18004	-2.36283	0.304977	0.660618	7.61549	4.40329	-4.97599	-6.66281	4.77334	-6.24011	-0.228484	2.31961	2.50836	-4.7798	-5.29587	3.98954	8.42859	-3.543	4.72218	1.92374	-3.40342	-1.60386	56.5191
514	-2.34842	18.3692	-2.11249	-7.1918	-2.66135	-1.68184	3.96818	4.47532	4.16686	7.23451	-3.09646	-2.58784	0.51111	1.10318	7.83503	4.30842	-4.87665	-6.45071	4.91639	-6.19094	-0.234445	2.60125	1.8999	-3.70045	-5.81692	5.31574	8.91835	-3.89367	5.10365	-0.855327	-3.72181	-1.51396	57.8225
516	-2.15819	18.2768	-1.81595	-7.08053	-4.31885	-2.34495	3.57181	4.24385	4.58856	7.54247	-2.75224	-3.76205	1.50849	1.40319	7.6135	4.24733	-5.11756	-6.68019	4.74056	-6.41694	-0.455975	1.76628	1.5825	-4.27763	-5.61674	5.01523	8.79367	-4.47085	5.36392	-1.15385	-4.11868	-1.70767	59.1045
518	-1.74642	19.1818	-2.24113	-6.28829	-5.80202	-0.702341	3.09894	4.62333	4.54833	7.47293	-2.03153	-4.86076	1.46031	0.599027	7.236	4.30644	-4.9298	-6.48002	4.80662	-6.10451	-0.231465	0.877182	2.74479	-5.15332	-3.52661	3.53058	8.49466	-3.98358	5.14984	0.549356	-5.94358	-2.01811	59.0056
520	-1.39823	20.1424	-3.16898	-6.76264	-5.70218	-0.273685	2.80639	4.58062	3.86188	6.93003	-2.36233	-5.01176	0.0546376	-0.558793	6.73284	4.17978	-5.02467	-6.46909	4.7033	-6.16014	-0.266234	0.536442	2.99414	-5.427	-3.27776	2.51929	8.18421	-3.03338	4.51406	-0.270704	-6.18398	-1.8691	58.7006
522	-1.3416	21.0797	-3.64631	-7.73321	-5.2313	-2.03798	3.00407	4.1455	3.38654	6.76215	-2.60621	-4.12265	-0.148018	-1.0699	6.5277	4.18425	-5.33561	-6.70552	4.54833	-6.52224	-0.546873	0.822544	1.93467	-5.21839	-5.07832	2.99513	8.21352	-2.35786	4.32034	-1.95851	-3.58075	-1.38183	58.9992
524	-1.33713	22.0656	-3.25392	-7.51416	-4.17779	-2.72195	3.72181	4.12017	3.82314	7.37409	-2.51234	-3.19829	1.131	-0.013411	6.78798	4.41472	-5.19305	-6.5436	4.76638	-6.3916	-0.425677	1.62274	1.34359	-4.60943	-5.61277	4.39336	8.47826	-2.00669	4.93129	-1.50651	-1.58151	-1.24971	59.3305
526	-1.26213	22.4556	-3.01152	-7.45157	-2.27094	-1.87705	4.18077	4.35859	4.34766	8.08984	-2.90523	-3.26484	0.876685	1.88549	6.79841	4.62482	-4.90695	-6.28829	5.13047	-6.11593	-0.0794729	2.23815	1.51147	-4.42713	-4.92732	3.84053	8.84036	-2.16365	5.64704	0.252823	-2.26597	-1.41809	59.8595
528	-1.5676	22.1794	-2.99662	-7.86434	-1.14044	-0.999371	4.10726	4.64916	4.18027	8.30144	-3.12428	-3.87728	-0.00149012	2.52823	6.60072	4.81854	-4.66853	-6.10699	5.38081	-5.90831	0.175337	2.33253	1.9749	-4.62333	-4.27415	2.11398	9.36041	-3.01401	5.73397	1.71115	-4.28259	-1.31528	61.3978
530	-2.13186	22.161	-2.48353	-7.7486	-2.05785	-1.13448	3.90063	4.67747	3.7834	7.87228	-2.6683	-4.06553	0.447532	2.16116	6.86149	4.85977	-4.67648	-5.9699	5.31723	-5.79854	0.0268223	1.95156	1.99576	-4.74652	-4.38293	2.14825	9.62615	-3.73274	5.15928	1.52886	-4.82003	-1.08182	62.2272
532	-2.33253	22.5211	-2.18302	-7.36813	-4.32382	-2.00371	3.75559	4.48128	3.69847	7.51217	-2.61118	-3.62098	0.314911	1.7792	7.2365	5.01722	-5.02865	-6.08514	5.03063	-6.04689	-0.443061	1.42256	1.54525	-4.94371	-5.08179	3.25143	9.62764	-3.72032	4.66704	0.145038	-3.8137	-1.17222	61.1648
534	-2.51134	22.0984	-2.59926	-7.33286	-5.06838	-2.25355	3.82115	4.40478	3.91155	7.63188	-2.97228	-2.84165	-0.484288	1.6734	7.21961	5.21342	-5.22335	-6.23763	5.00431	-6.23018	-0.653664	1.46429	1.34408	-4.70132	-5.46326	3.8748	9.20842	-3.89864	4.71721	-0.858307	-2.87046	-1.09027	61.504
536	-2.28335	21.6226	-3.6031	-7.61598	-4.11123	-1.75238	3.90659	4.31786	4.11272	7.56333	-3.04729	-2.45422	-0.134607	1.79162	7.04328	4.85231	-5.2467	-6.23018	5.06689	-6.18845	-0.613928	1.70916	1.46627	-4.67052	-5.6833	3.92695	8.2463	-3.80029	4.86473	-1.02868	-2.22226	-0.669559	63.2529
538	-0.957151	22.2335	-4.5235	-7.57625	-4.98742	-1.16974	3.64681	4.27663	4.05858	7.28021	-3.30458	-2.99662	0.67999	1.39127	6.70006	4.27564	-5.47767	-6.13779	4.81655	-6.24607	-0.755986	1.15981	1.88102	-5.578	-5.79456	3.45707	7.54446	-2.44429	4.85182	-0.289579	-2.66184	-0.672042	63.0324
540	0.419219	22.9572	-3.8897	-6.58284	-6.05285	-0.822544	3.62694	4.66903	4.2066	7.38998	-3.52512	-3.61154	0.699858	0.854333	6.67721	4.40925	-5.39074	-5.73993	4.77582	-6.03149	-0.714262	0.807643	2.57293	-5.52436	-5.22435	3.1357	7.53502	-1.05302	5.05745	0.346204	-3.85046	-1.19358	61.6203
542	0.353158	22.685	-2.42045	-5.99573	-4.69337	-1.32273	4.0854	5.1866	4.85579	7.84298	-3.73274	-3.37164	0.227988	0.614921	7.32243	5.3371	-5.01722	-5.47419	5.19603	-5.77718	-0.38296	1.50353	2.78652	-4.54386	-4.86424	3.26484	8.00937	-1.16179	5.61873	-0.55929	-3.77297	-1.42157	61.3054
544	-1.48267	21.3409	-2.51482	-6.82771	-4.07298	-2.74678	4.14501	4.98344	5.37833	8.07345	-4.2811	-3.22312	0.12964	0.589589	7.55539	5.91278	-5.40564	-6.11146	5.22584	-6.35038	-0.582636	1.80304	1.90437	-5.09371	-5.5174	3.46353	8.52197	-2.80639	6.10153	-1.13547	-2.7582	-0.974536	62.4875
546	-3.29067	20.5303	-3.38753	-6.97325	-4.86275	-3.12279	3.76801	4.66903	5.45233	8.04464	-4.49916	-4.06802	0.896057	0.878672	7.24047	5.75036	-5.88844	-6.61512	5.00679	-6.7686	-0.944734	1.30385	1.25269	-6.10848	-5.22633	3.82513	8.85824	-4.01586	6.26495	0.0601013	-3.12477	-0.586112	63.8197
548	-3.09298	21.2307	-2.73933	-6.18647	-4.80264	-2.24411	3.81122	4.97699	5.26756	8.12511	-4.02778	-4.59005	2.2307	1.51495	7.1605	5.63264	-5.47171	-6.1964	5.25167	-6.29127	-0.709295	1.17173	1.73102	-5.52237	-4.02778	3.9955	9.10511	-3.27279	6.30071	1.45535	-3.71486	-0.855327	63.9588
550	-1.32471	22.2221	-1.95603	-6.3767	-4.15842	-2.06977	4.31736	5.35548	5.13345	8.38041	-3.70244	-4.18723	3.15408	2.34048	7.24395	5.77619	-4.97351	-5.77072	5.68529	-5.91477	-0.331799	1.57555	2.28633	-4.674	-3.87629	3.46899	9.31124	-1.85569	6.39061	1.64956	-2.92758	-1.39972	63.543
552	-0.301004	21.9082	-2.80887	-7.60406	-3.12378	-2.40207	4.74701	5.5333	5.36541	8.54035	-3.91304	-4.11669	2.37028	2.37624	7.28369	5.80102	-4.97599	-6.0002	5.97189	-6.16858	-0.0948705	2.02507	2.56598	-4.86523	-4.72863	2.88685	9.3321	-1.92871	6.52174	1.36594	-2.70953	-1.60883	64.0646
554	-1.0555	20.5283	-3.77744	-8.46734	-0.814597	-2.9246	4.96904	5.53181	5.82735	8.64764	-4.47134	-4.31041	-0.0273188	1.62721	7.34578	5.4578	-5.09818	-6.59625	6.07222	-6.58234	0.0730157	2.59479	2.46714	-4.86622	-6.17504	3.02643	8.97	-3.49929	6.79046	-0.0417233	-2.53717	-1.34408	65.7886
556	-1.73946	20.6485	-3.4973	-7.94927	1.73201	-2.90076	5.19653	5.81791	6.52075	9.54519	-4.94868	-3.60956	-1.00732	1.53581	7.73619	5.48959	-4.83294	-6.7542	6.4378	-6.47604	0.439087	3.26534	2.48303	-4.2672	-6.67026	3.60409	8.88507	-4.26968	7.80523	-2.69016	-1.66992	-1.10666	66.8431
558	-1.58548	22.4764	-2.90672	-7.45108	1.70221	-1.51843	5.79208	6.77456	7.69446	11.1307	-4.80413	-2.2913	0.80665	1.91033	8.90692	6.49492	-4.29253	-6.56148	7.27524	-6.1214	1.055	3.82115	3.35971	-4.63625	-5.97537	4.81009	9.78063	-3.71834	9.47863	-3.0607	-1.72406	-1.34408	65.956
560	-1.78814	23.4067	-2.85059	-7.89712	-1.14391	-0.501176	6.37074	7.26581	8.48323	11.5961	-4.65214	-2.64347	2.2769	1.64111	9.80894	7.03037	-4.33425	-6.62506	7.6438	-6.21378	1.1911	4.1465	3.89566	-5.66492	-5.54423	6.27885	10.4527	-3.30706	10.2758	-1.67986	-2.99762	-1.52588	64.6089
562	-2.10007	23.1052	-2.71102	-8.44101	-3.1963	-1.49161	6.17802	6.38862	8.38985	10.3335	-4.50661	-3.93043	1.36693	1.66098	9.43343	6.10004	-5.02418	-6.76811	7.09395	-6.6335	0.603497	4.00245	2.83122	-5.39124	-5.94358	6.13829	9.6788	-3.31501	9.66589	-1.59542	-3.50227	-1.21792	64.4778
564	-1.59244	23.0441	-2.07424	-8.46138	-2.61714	-2.67128	5.95152	5.8045	8.50558	9.45628	-3.93639	-3.62247	-0.143051	1.87258	9.07481	5.26955	-5.31773	-6.64641	6.76662	-6.69459	0.304977	3.5574	1.95603	-4.14352	-6.50684	5.22633	8.84086	-3.27925	9.30379	-2.17805	-3.05424	-1.11659	65.65
566	-1.08828	23.6337	-2.30322	-8.02726	-2.83519	-2.5327	6.04937	6.41445	9.01073	10.1676	-3.35723	-3.25143	0.193715	0.835458	9.51489	5.38329	-5.28991	-6.63102	7.03384	-6.69012	0.461936	2.91864	2.6231	-4.57813	-6.28084	5.5328	9.0301	-3.18388	9.99818	-1.69526	-3.77397	-1.52886	67.2216
568	-1.59442	23.8513	-3.99301	-8.26567	-6.26494	-2.55009	5.72304	6.78897	9.03308	10.9499	-2.96086	-3.96719	2.36183	-0.714262	9.81788	5.5025	-5.87851	-7.27773	7.04825	-7.38204	0.138084	1.91778	3.23504	-6.9797	-6.11544	6.24607	9.26058	-3.31948	10.4859	0.215074	-4.96705	-1.74691	68.7008
570	-2.51929	23.3109	-5.07931	-9.09815	-9.85712	-3.05772	5.0957	6.37621	8.48174	10.9131	-3.14166	-4.71224	3.7094	-1.22637	9.27796	5.13941	-6.57737	-7.97113	6.70254	-8.16137	-0.47038	1.12802	3.06318	-8.21302	-6.39607	5.92073	8.89649	-3.73522	10.0851	1.17769	-5.07087	-1.59144	69.8104
572	-2.79645	23.2289	-4.91391	-9.74288	-9.5427	-3.35326	4.92384	5.83529	7.89563	10.474	-4.01735	-4.48277	2.91765	-0.137587	8.69383	4.64817	-6.6335	-8.13454	6.45667	-8.32776	-0.612934	1.30236	2.68022	-7.54346	-6.82573	4.76539	8.46038	-3.81718	9.25561	-0.0268221	-3.76304	-1.49806	69.8537
574	-2.412	23.8523	-4.17133	-9.28243	-5.13047	-3.09894	5.34356	5.77966	7.49826	10.0091	-4.33425	-3.70592	1.65701	1.45535	8.90394	4.57515	-5.9093	-7.60605	6.65883	-7.70241	-0.0834464	2.51085	2.44876	-6.06577	-6.48499	4.47879	8.68142	-3.32048	8.56121	-0.624855	-2.19047	-1.54624	69.42
576	-2.27044	23.9804	-3.39796	-8.27263	-1.76628	-3.29316	5.44637	5.74241	6.87291	9.32962	-3.8291	-3.29316	0.973046	2.12441	9.01918	4.62433	-5.36094	-7.0254	6.72837	-7.09792	0.285605	3.31104	2.00272	-4.83791	-5.90732	5.16673	9.13093	-2.9246	7.97212	-0.137091	-1.59144	-1.45535	69.4702
578	-2.77758	22.8231	-3.29862	-8.61635	-3.48389	-4.00196	4.99338	5.53528	6.16262	8.61386	-4.29004	-3.34034	1.05848	1.25666	8.63026	4.38939	-5.72652	-7.24594	6.34392	-7.34379	-0.000993411	2.62707	1.73847	-4.87417	-6.61512	5.74489	8.9998	-3.33836	7.54794	0.451505	-2.30422	-1.22388	69.9744
580	-3.0453	21.6504	-3.40541	-9.07779	-6.6941	-3.03537	4.57764	5.68579	5.82288	8.41071	-5.58595	-4.5081	1.54277	-0.149012	8.47081	4.18524	-5.92719	-7.44164	6.1959	-7.50969	-0.114242	1.57505	2.3966	-5.50946	-6.80586	6.05335	8.53141	-4.04418	7.46349	1.49359	-4.06951	-1.3123	70.5103
582	-2.51432	21.632	-2.95788	-8.62827	-5.8646	-0.98596	4.47681	6.00169	5.80549	8.73705	-5.82784	-5.50499	1.48366	0.134607	8.61734	4.27564	-5.23478	-6.91464	6.60618	-6.92109	0.498195	1.68929	2.98172	-5.3515	-5.76874	6.03547	8.36849	-3.9801	7.61946	1.90288	-4.22249	-1.68979	70.7616
584	-1.89741	21.6703	-2.488	-8.14001	-2.6385	0.194212	4.6283	6.30915	5.86261	9.22382	-5.26955	-4.85381	1.19458	1.05451	8.60691	4.54336	-4.38193	-6.3618	7.14709	-6.25749	1.25617	2.58336	3.16252	-4.82698	-5.21143	5.503	8.69483	-3.22213	7.84198	1.2368	-2.50985	-1.82192	70.8997
586	-1.89741	21.106	-2.78403	-7.53353	-2.40356	0.822544	4.3879	6.41346	5.36442	9.08176	-4.9899	-4.67747	0.539422	0.584622	8.29498	4.48426	-4.21256	-6.32902	7.13964	-6.18945	1.42058	2.57343	3.41088	-5.24322	-5.11308	4.32978	8.90295	-2.93851	7.41283	-0.127653	-2.30223	-1.57009	71.304
588	-2.38021	21.1135	-3.64184	-7.07656	-3.62843	1.78864	4.06951	6.52125	4.61737	8.62082	-5.05994	-5.63711	-0.338256	0.0596047	8.14597	4.33276	-4.24087	-6.48399	6.96828	-6.25898	1.45187	2.13931	3.91553	-5.46624	-4.60992	3.92	8.98093	-3.84053	6.6787	-1.23729	-3.92795	-1.27902	72.2244
590	-2.67227	22.3344	-4.74652	-7.21614	-2.638	2.35289	4.49667	6.8893	4.57764	8.83291	-4.7947	-5.79208	0.187755	0.548363	8.43604	4.5831	-3.8137	-6.59923	7.31051	-6.04987	1.87208	2.53916	4.60992	-5.47816	-3.84251	5.16226	9.21438	-4.69784	6.71645	0.916918	-5.37237	-1.33564	72.7206
592	-2.5779	23.3759	-5.17964	-7.70291	-1.58648	1.11808	4.95712	6.83765	4.7341	9.22332	-4.47581	-4.91242	0.976523	1.21395	8.43604	4.74205	-3.58969	-6.76463	7.52906	-5.99275	2.02556	3.11285	4.49667	-5.41657	-4.04517	5.66194	9.2715	-4.47532	7.09593	2.61217	-4.59254	-1.5229	72.2925
594	-2.85208	23.3178	-4.69734	-8.21799	-3.11782	-1.35054	4.51008	5.955	4.06106	8.81255	-5.04901	-4.00891	1.32173	1.78268	7.59959	4.37895	-4.21951	-7.01547	6.96033	-6.4378	1.37438	2.75622	3.19183	-5.05994	-5.22782	4.24335	9.29385	-4.26471	6.62754	-0.697871	-2.3216	-1.43299	72.0213
596	-3.60409	22.836	-4.59502	-8.64019	-6.13977	-3.19779	3.56436	5.0664	2.91119	8.05209	-5.28196	-3.36468	2.58833	2.4274	6.85851	3.96868	-5.24422	-7.42227	6.09308	-7.25041	0.376006	1.47422	1.98235	-6.33647	-6.23663	3.20822	9.272	-4.47879	5.42651	-2.59032	-1.03762	-1.36544	72.1653
598	-3.57777	22.4446	-4.37697	-8.87315	-7.24544	-3.32495	3.07212	5.20597	2.43038	8.0501	-4.17183	-2.30223	3.31451	2.22673	6.86099	4.1917	-5.5934	-7.54694	5.82635	-7.65274	0.0327825	0.796219	2.27789	-8.13901	-7.00901	3.75956	9.49949	-4.13458	4.88559	1.07388	-0.521044	-1.80105	71.7998
600	-2.79248	22.0517	-2.98619	-8.35607	-4.75397	-2.34197	3.20971	6.02404	2.91069	8.73456	-3.67016	-1.93516	3.14365	1.46975	7.11977	4.86076	-4.81357	-6.91712	6.29375	-7.0259	0.661612	1.67588	3.45459	-7.42823	-6.59575	4.4331	10.327	-3.65327	5.52932	3.8594	-0.89705	-2.20189	71.2678
602	-2.48204	21.6102	-1.51843	-6.89377	-1.34359	-1.58548	3.56932	6.36578	3.37809	9.1369	-4.72168	-3.80576	2.41896	1.79658	7.21514	5.15332	-3.74367	-5.86212	6.82026	-5.91675	1.47869	3.04431	3.95278	-4.80016	-4.59154	4.52846	11.0676	-3.87579	6.19988	0.524024	-2.61168	-1.91083	71.5579
604	-2.81334	21.2948	-1.65403	-6.3469	-0.0725191	-1.48267	3.97811	6.0906	3.21567	9.02315	-5.49803	-5.65251	0.597537	2.59529	7.36862	5.06341	-3.45608	-5.46475	6.935	-5.42601	1.68979	3.6642	3.65724	-3.27329	-3.67065	4.9	11.1411	-4.65959	6.02504	-3.48538	-3.67562	-1.432	72.2413
606	-2.54363	22.1317	-2.17954	-6.62406	-1.4315	-0.958641	4.37051	6.0752	3.13272	9.02613	-5.01573	-5.22782	-0.000993474	2.64893	7.86434	5.24074	-3.60856	-5.47667	6.99411	-5.37982	1.6128	3.27528	3.79632	-3.36518	-3.80178	4.63178	11.1272	-4.74254	5.7295	-2.87543	-3.84102	-1.48813	71.8226
608	-1.75635	23.7589	-1.48515	-6.49889	-3.00606	-0.0273188	4.62184	6.60618	3.64631	9.40661	-4.7341	-3.8599	1.35501	1.87953	8.28554	5.75731	-3.53406	-5.08775	7.23551	-5.12898	1.65552	2.6842	4.58707	-3.6036	-3.30756	3.6483	11.535	-3.67711	6.02454	-0.572205	-3.87877	-1.86761	70.1423
610	-2.28037	23.8672	-1.19855	-7.33733	-3.02742	-0.114739	4.60148	6.77953	4.10428	9.6495	-5.42104	-3.34233	1.85668	1.28349	8.02179	6.05981	-3.72181	-5.18064	7.16299	-5.28544	1.47869	2.55009	4.71721	-4.3576	-3.62396	4.13358	11.7729	-2.92559	6.34541	0.655154	-3.03288	-1.69923	68.7952
612	-3.61502	22.9736	-2.11696	-8.52098	-2.66135	-1.00782	4.38591	6.39657	3.9652	9.58989	-6.03249	-3.12974	1.52091	1.90735	7.54744	6.05782	-4.27862	-5.91079	6.68764	-5.92172	1.07785	2.5784	3.99103	-5.67387	-5.01076	5.15928	11.5489	-2.97328	6.17107	1.22686	-1.46329	-1.1002	68.1311
614	-4.10477	22.6572	-2.8193	-8.26269	-1.50253	-1.09722	4.41521	6.38564	3.9796	9.75231	-6.40402	-2.59777	1.06941	2.91914	7.68602	6.36776	-4.2359	-6.17405	6.62853	-5.97487	1.14441	2.92559	3.59168	-5.76774	-5.82635	4.86473	11.7004	-3.317	6.20087	0.240405	-0.207126	-0.919898	67.841
616	-3.60658	22.7163	-3.07212	-7.65721	-0.455975	-0.0635784	4.63227	6.83218	4.62085	9.95745	-6.80983	-2.6236	0.355144	2.92261	8.30591	6.87887	-3.71883	-6.03795	6.9956	-5.55664	1.53333	3.30557	4.06106	-5.01821	-5.60035	4.53293	12.4698	-3.78738	6.65536	-1.86513	-0.159939	-1.20501	67.7049
618	-2.88735	23.0009	-3.00705	-7.1456	-1.57108	1.1911	4.71026	7.10984	5.37882	9.93907	-6.71496	-4.26918	0.743071	1.99328	8.82248	6.8744	-3.53207	-5.78115	7.14213	-5.26061	1.69476	3.04083	4.89304	-4.54287	-4.30892	5.10563	12.9392	-4.27961	7.10587	-1.81645	-1.63416	-1.35253	67.4789
620	-3.15408	22.6249	-2.41896	-6.45121	-3.1208	1.10964	4.65413	7.00901	5.42949	9.86854	-6.62307	-6.18746	1.29839	1.61231	8.56568	6.54608	-3.7089	-5.49356	6.90073	-5.16077	1.52042	2.45919	5.04603	-3.85841	-3.50475	5.08875	12.822	-4.82996	7.22458	-1.28051	-2.99414	-1.01179	67.8604
622	-4.17729	21.2933	-2.55605	-6.42538	-3.45856	-0.623365	4.53542	6.6638	5.08378	9.78013	-6.87788	-6.0906	1.11957	2.20637	8.00093	6.55204	-4.15097	-5.70963	6.4974	-5.46823	1.07239	2.06083	4.25379	-3.64135	-4.49916	4.18176	12.8279	-5.25862	7.08699	-1.15484	-2.19991	-0.751515	68.219
624	-4.63774	20.9088	-3.99003	-6.69509	-2.02954	-1.41064	4.72615	6.58631	5.17319	9.68973	-6.60221	-5.00232	0.616908	2.63304	8.02924	6.83864	-4.3119	-6.10103	6.4219	-5.70168	0.883142	2.28584	3.7243	-4.51555	-4.71224	3.79433	13.0817	-5.37336	7.05719	0.265737	-1.87904	-1.07388	67.3393
626	-4.47084	21.9931	-5.11557	-7.58519	-0.89854	-1.04656	4.97599	6.50386	5.25167	9.32962	-5.95599	-4.03474	-0.0173848	2.08368	8.35359	6.65834	-4.36008	-6.34144	6.31909	-5.8045	0.796715	2.70655	3.74566	-5.29339	-4.31041	4.11719	12.9814	-5.33114	6.82274	0.47336	-3.59664	-1.26163	65.9679
628	-4.18822	22.8489	-5.15928	-9.22531	-3.59118	-1.08282	4.45743	6.03547	5.13643	8.76933	-5.62916	-3.52313	0.295043	0.8141	8.45641	6.09259	-5.07037	-6.69956	5.72701	-6.46561	0.156959	1.91232	3.78191	-5.81642	-5.14885	4.38889	12.4738	-5.25763	6.44326	-1.01527	-4.6427	-1.01477	64.821
630	-3.86089	22.7968	-4.91788	-9.49452	-7.38651	-0.534952	3.78092	5.91129	5.60135	8.85973	-5.57552	-3.71188	1.54575	0.370542	8.47081	6.0906	-5.69224	-6.97275	5.39869	-7.14213	-0.321865	0.712772	4.17481	-6.74278	-5.43992	4.60446	12.3218	-4.98196	6.8138	-1.50353	-4.35064	-1.07884	63.4745
632	-3.54548	22.4253	-4.11222	-7.76947	-7.8549	1.02172	4.21355	6.4532	6.46114	9.51042	-5.32518	-4.76787	2.28385	1.16527	8.82049	6.65883	-5.30531	-6.68416	5.81195	-6.89874	0.169873	1.18266	4.87417	-6.67522	-4.11222	5.41309	12.6104	-4.34617	7.68801	-1.25368	-4.63227	-1.51843	62.27
634	-3.67661	22.0691	-2.95142	-6.70304	-7.01	0.920892	4.88261	6.31263	6.54757	9.36985	-5.06341	-5.81294	1.68383	2.16365	8.89897	6.46661	-5.16127	-6.50833	5.88596	-6.72092	0.375509	2.17011	4.36008	-5.92123	-3.89864	6.181	12.3709	-4.0099	7.66267	-1.02222	-4.57565	-1.60933	61.8701
636	-4.32928	21.7736	-2.89778	-8.18272	-7.76599	-1.92175	4.28557	4.71622	5.62618	8.09481	-5.26359	-4.75297	0.784298	2.91665	7.95374	5.20498	-6.41247	-7.3269	4.82152	-7.7789	-0.854333	1.36544	2.13484	-6.53664	-6.24657	5.07385	11.4292	-4.53691	6.53664	-0.642737	-1.734	-1.33415	61.3347
638	-4.87665	21.7999	-3.82562	-9.94305	-7.48485	-4.20113	3.5728	3.61105	4.96954	7.08153	-5.55764	-2.93156	0.710786	2.81036	7.24445	4.39137	-7.46598	-8.07097	3.99301	-8.73556	-1.89145	0.322858	0.704825	-7.36167	-8.41518	3.14216	10.8272	-5.38478	5.75483	-0.627339	1.04209	-1.18961	60.1401
640	-4.74006	22.7521	-4.10229	-9.51936	-4.19418	-3.7834	4.20411	4.48724	5.54124	7.34876	-6.05235	-2.71797	0.760456	2.26249	8.0362	4.9	-6.72837	-7.58717	4.64022	-8.18123	-1.21792	1.2969	1.72853	-6.65734	-8.13156	3.45459	10.9459	-5.58148	6.33796	-0.384947	0.775854	-1.36693	58.7856
642	-4.2811	23.8205	-3.01848	-7.72824	-1.34557	-1.63317	5.22931	6.15815	6.61463	8.31634	-7.02341	-3.1958	0.701845	2.08368	9.36588	6.00318	-5.23925	-6.34491	5.9242	-6.79692	0.159442	2.96334	3.67115	-4.97053	-5.89291	5.39819	11.6199	-5.07931	7.50919	-1.05004	-1.22786	-1.5383	57.6541
644	-4.25875	22.9691	-3.10888	-6.78053	-1.84178	-0.0362595	5.28693	6.89377	6.88583	8.87613	-6.80586	-4.02729	1.18663	1.79658	9.81887	6.53317	-4.8245	-5.95947	6.37968	-6.30866	0.605981	3.25342	4.67251	-5.32418	-4.27365	6.51578	12.206	-4.80761	7.95275	-0.161926	-3.49085	-1.41114	56.9915
646	-4.58757	20.498	-4.87119	-7.21067	-3.20921	-0.231961	4.70082	6.35882	6.33299	8.67993	-5.71956	-5.93166	1.46776	1.97589	9.38525	5.93712	-5.47816	-6.74278	5.87453	-6.91215	0.100335	2.4875	4.14997	-7.2365	-4.29749	6.06577	11.7997	-5.05596	7.60804	3.48339	-5.13047	-1.23332	56.7322
648	-4.50363	19.3144	-4.88112	-8.23985	-2.76814	-1.36097	4.4331	5.69622	5.69671	8.05557	-6.50237	-5.91725	1.50005	2.54512	8.93871	5.19902	-5.89093	-7.25985	5.42055	-7.23501	-0.320375	2.14229	3.12676	-6.23912	-5.22435	5.27004	11.1982	-5.03858	7.00702	2.46863	-4.63923	-1.31875	56.2663
650	-3.67165	20.6297	-3.62694	-9.11554	-2.86102	-2.4726	4.1152	5.49505	5.04057	7.39445	-7.78586	-3.44614	2.51432	1.94063	8.45144	4.95513	-6.11643	-7.23203	5.14835	-7.30008	-0.636776	1.8398	2.71847	-4.47184	-6.49343	5.02616	11.1938	-4.36157	6.46561	-1.26809	-2.63602	-1.55916	54.5492
652	-2.93901	22.4849	-3.52909	-8.72016	-3.22411	-2.02705	3.73274	5.66045	4.67747	7.1158	-6.95884	-3.21418	2.96583	0.848373	8.01534	4.9144	-6.15666	-6.97523	5.09272	-7.31945	-0.768403	1.60138	3.15805	-5.17567	-6.26594	4.55379	11.2916	-3.79384	6.29177	-0.584622	-2.55108	-1.61032	52.5191
654	-3.44018	23.5284	-3.80874	-7.9597	-0.962615	-0.30448	4.40429	6.32654	5.09471	7.66019	-5.80947	-4.98593	1.44094	0.934303	8.41171	5.17517	-5.43346	-6.52572	5.78612	-6.86546	-0.04371	2.77857	4.16438	-5.59688	-4.7341	4.03821	11.4843	-3.99848	6.83963	0.976523	-4.22746	-1.37091	52.2132
656	-4.45843	24.0301	-3.35326	-8.07295	-0.0392398	-0.0745058	5.62121	6.98864	5.88944	8.69036	-5.8492	-5.42849	1.12206	1.89344	9.57102	5.65996	-4.76042	-6.332	6.57638	-6.46015	0.777344	4.04616	4.67747	-4.67499	-4.16189	4.75198	11.8002	-4.523	7.74364	-0.459453	-4.1162	-1.17173	53.0144
658	-4.51803	23.4231	-3.13024	-8.63373	-3.79185	-1.36197	5.7444	6.73533	6.05136	8.92878	-5.98828	-5.0361	3.41982	2.65092	10.1184	5.5328	-5.20796	-6.90669	6.44426	-6.93798	0.497202	3.52611	4.02878	-5.03312	-4.8096	6.4378	11.528	-5.11706	7.8241	-0.976523	-2.00669	-1.34508	52.9692
660	-4.44154	21.3459	-3.76453	-9.55413	-7.45455	-2.29478	4.88162	5.70118	5.37336	8.17428	-5.93265	-4.81407	4.65115	2.92559	9.42896	4.51406	-6.33895	-7.94331	5.69473	-8.05855	-0.445048	2.41945	2.90672	-6.49492	-6.03298	7.22309	10.4656	-6.44177	6.89079	1.01974	-0.232955	-1.49757	52.2162
662	-5.08875	19.8419	-4.56274	-10.182	-7.2211	-2.49495	4.26322	5.09471	4.81357	7.64281	-6.02255	-4.56075	2.56896	2.16365	8.76784	3.73324	-6.92556	-8.50558	5.24521	-8.73307	-0.918905	1.92722	2.46714	-7.01745	-7.41829	6.06229	9.68923	-7.65373	6.16809	1.72853	0.0471871	-1.4315	51.0693
664	-5.35448	20.3093	-4.88907	-10.1502	-4.6288	-1.90238	4.33425	5.47518	4.90745	8.04911	-6.06428	-4.1465	0.331302	1.30584	9.00875	4.10279	-6.47853	-8.30193	5.4424	-8.46287	-0.507136	1.8701	3.06616	-6.49442	-8.1564	4.95513	10.024	-7.29114	6.21627	0.569224	-0.827511	-1.64062	49.2747
666	-4.70281	21.5267	-4.26173	-9.11703	-2.32706	-0.142554	5.05646	6.58085	5.29538	9.08027	-5.44339	-3.97116	0.698368	1.55717	9.83526	5.23925	-5.27948	-7.2519	6.35733	-7.24097	0.639757	2.64496	4.51207	-5.19107	-6.62605	6.26644	11.0919	-6.04093	6.72738	-0.182291	-2.74132	-2.17905	47.7061
668	-4.22895	22.0632	-4.23044	-7.58171	-1.69128	0.840922	5.55863	7.13269	5.22484	9.47962	-4.6581	-4.85281	1.8249	2.04543	10.1914	5.77668	-4.62333	-6.32604	7.03384	-6.33349	1.35849	3.80129	5.2467	-4.76191	-3.97762	7.66814	11.6954	-5.37187	6.8143	0.000496737	-5.28097	-2.39114	46.584
670	-4.91987	21.4537	-5.59539	-7.99795	-2.11596	-0.495712	4.93328	6.29276	4.40627	8.64615	-5.29389	-5.57005	2.47409	1.72605	9.60579	5.04504	-5.34306	-6.80536	6.49691	-6.9797	0.780821	3.72529	4.20163	-6.07818	-3.84847	6.62853	11.2211	-5.80003	6.08712	0.868241	-6.0156	-1.93665	45.5558
672	-5.85417	20.6927	-5.59837	-10.1184	-1.71065	-1.78417	4.16984	5.47369	3.71138	7.85043	-6.39608	-4.59403	2.93255	1.23084	9.19004	4.42018	-5.95599	-7.57724	5.84275	-7.73817	0.146031	2.8645	3.1054	-6.59227	-5.3515	5.09073	10.6509	-6.41396	5.45929	1.59641	-3.93142	-1.53532	44.6483
674	-5.67784	21.2471	-3.79284	-10.251	-0.271698	-1.14342	4.30594	5.75632	3.51419	7.98851	-6.82423	-4.05808	2.55704	1.8547	9.37482	4.82202	-5.40117	-7.22607	6.11146	-7.16845	0.510613	2.92858	3.35425	-5.32418	-5.0813	5.04255	10.7229	-6.12537	5.3972	0.383456	-1.72555	-1.78218	43.5213
676	-5.16027	22.1451	-3.37809	-8.30889	-0.751515	-0.393391	4.16885	6.0449	2.93503	8.01484	-7.28617	-4.97997	1.22438	2.29826	9.00775	5.06739	-5.27898	-6.89179	6.15021	-6.84559	0.543396	2.86102	3.85294	-5.19554	-4.6288	5.62817	10.6956	-5.83927	4.99586	-1.17868	-1.21792	-2.21928	42.4097
678	-5.46426	21.6131	-4.95265	-7.57774	-3.94682	-1.13895	2.97825	5.4429	1.84526	7.33634	-7.29164	-5.45333	0.42667	1.60535	7.89165	4.58558	-6.45965	-7.60257	5.20845	-7.86334	-0.599523	1.19259	3.3468	-7.0855	-5.66939	5.46525	10.3811	-6.63499	3.98805	-0.25183	-1.9605	-2.18401	41.9055
680	-5.32965	20.802	-6.13083	-8.16584	-6.90569	-1.92672	1.93914	4.99139	1.24127	7.09593	-6.94394	-5.08825	1.40468	1.08928	7.26879	4.5528	-7.44909	-8.16385	4.45644	-8.73158	-1.5825	-0.693897	2.77658	-8.28803	-6.28581	4.99884	10.7139	-6.77059	3.53406	1.14987	-3.01152	-2.01066	40.7616
682	-3.99103	21.2972	-5.45929	-8.16584	-6.92258	-1.39574	2.15719	5.4429	1.6739	7.85738	-6.77456	-4.64718	2.94993	1.91232	7.839	5.42104	-7.12176	-7.6284	4.76688	-8.2468	-1.31528	-0.614425	3.21418	-7.27872	-5.35796	5.48859	11.5971	-5.3073	4.10726	0.364582	-3.27875	-2.20686	38.6114
684	-3.59813	21.8466	-4.5985	-7.77692	-5.48015	-0.738104	2.8799	5.80698	2.46068	8.66701	-6.64045	-5.01921	2.33501	3.59267	8.58208	6.10153	-6.61314	-7.10587	5.22335	-7.58916	-0.796219	0.659625	3.48737	-5.97785	-4.18127	6.04093	11.9115	-4.76142	4.84735	-1.24425	-2.53469	-2.14825	37.5624
686	-4.83841	20.8125	-5.1409	-8.00888	-5.59439	-1.27604	2.73188	5.43992	2.76665	8.8498	-6.78052	-5.62618	-0.34819	3.78887	8.34465	6.13332	-7.14511	-7.70837	4.90397	-8.11517	-1.23531	0.829995	2.96285	-6.45171	-4.84188	4.96507	11.6562	-6.11097	5.11656	-1.79609	-1.7946	-1.59591	38.1976
688	-6.02851	19.0526	-5.87702	-9.15527	-6.30021	-2.40654	2.15024	5.08179	2.64496	8.65807	-7.09047	-4.58062	-1.67489	2.58933	7.9155	6.1368	-7.95722	-8.78125	4.25975	-9.15577	-2.05437	0.193218	2.59082	-7.56035	-7.23501	3.58174	11.7868	-7.41134	5.06838	-1.81148	-1.4618	-1.25418	38.5448
690	-6.13779	19.1177	-5.9242	-10.4611	-6.88185	-3.56287	1.80552	4.80364	2.45273	8.39829	-7.20421	-2.33849	-0.308454	2.13186	8.02726	6.21329	-8.47628	-9.498	3.70095	-9.89238	-2.66333	-0.501176	2.23766	-8.20756	-9.59386	3.67314	12.0625	-7.09991	4.91391	-1.84178	-0.0973543	-1.34607	37.0358
692	-5.39223	21.5188	-5.67585	-9.79453	-7.97262	-3.18935	1.59293	4.45942	2.53171	8.40575	-7.10984	-2.39114	1.80503	2.72393	7.78784	6.17057	-8.66403	-9.24816	3.42727	-9.81937	-3.02146	-1.15087	1.78665	-8.5478	-8.94964	4.45346	11.9587	-5.65052	4.96656	-1.07884	0.245869	-1.507	34.675
694	-5.39025	23.1817	-5.73993	-8.82794	-8.00788	-1.63813	1.41213	4.1907	2.66929	8.22892	-7.56532	-4.63376	1.90636	2.71897	6.7393	5.95103	-8.69334	-8.74003	3.23008	-9.4225	-3.24349	-1.36544	1.57009	-8.16385	-6.6479	3.67562	11.5777	-5.06739	4.85579	-1.507	-1.66049	-1.33117	33.3001
696	-6.38465	23.1261	-6.31809	-9.2114	-7.76599	-1.4022	1.28746	4.11719	2.88337	7.97411	-7.97311	-5.86808	0.329316	1.31428	6.12189	5.78562	-8.93325	-8.96851	2.98222	-9.59237	-3.49929	-1.28895	1.60833	-7.99348	-6.20633	2.2312	11.1873	-5.65847	4.78824	-2.8039	-3.47843	-1.06792	32.6355
698	-6.72241	23.5125	-6.29574	-9.53972	-8.1415	-1.6282	1.53035	4.66704	3.73224	8.55575	-7.78536	-5.1106	-0.355641	0.452995	6.77158	6.11196	-8.98987	-9.39618	3.20276	-9.91573	-3.42329	-0.98894	2.32458	-8.59996	-6.80635	2.59777	11.235	-6.06328	5.6242	-1.75287	-4.23243	-1.35352	31.0108
700	-6.38515	23.7768	-5.01076	-10.5927	-7.12921	-1.71562	1.78913	5.24024	4.43508	9.2725	-7.81814	-2.7736	-0.117223	1.10269	7.48237	6.47753	-8.83589	-9.6331	3.55293	-9.96143	-3.16203	-0.535945	3.03437	-8.2021	-7.58568	3.55542	11.604	-6.47108	6.3926	-0.963609	-3.23703	-1.74145	29.6116
702	-6.18845	22.237	-4.46091	-11.3154	-6.80586	-2.83321	1.41511	4.75744	3.96917	8.91288	-7.41382	-2.37326	-0.659625	1.72257	7.17193	6.16411	-9.22084	-9.83924	3.11285	-10.2053	-3.57181	-0.884136	2.41299	-7.93288	-7.66764	3.74814	11.388	-7.29909	6.02007	-1.24425	-3.04679	-1.5681	30.1793
704	-6.26495	20.0093	-6.09607	-10.8778	-8.52346	-4.63128	0.571211	3.50773	3.11434	7.73619	-6.81033	-4.48525	-1.37488	1.55568	6.34293	5.4583	-10.3066	-10.3633	1.95056	-11.0368	-4.76638	-2.38021	0.823538	-9.23077	-7.71383	3.11832	10.4462	-8.01832	5.21739	-0.757972	-4.55628	-1.22935	31.1812
706	-6.20584	19.1793	-7.69645	-10.6702	-8.84483	-5.25316	0.433624	2.86102	3.50624	7.45406	-6.9042	-5.27948	-1.00036	1.80056	6.21229	5.26061	-10.8764	-10.8451	1.41462	-11.614	-5.39323	-3.16997	-0.150998	-9.68079	-8.57065	1.97838	9.99918	-8.00888	5.5934	-0.720223	-4.7033	-1.26759	30.838
708	-5.64655	19.744	-7.5529	-10.549	-7.36366	-4.24832	1.03265	3.04977	4.5826	8.12213	-6.91017	-5.25713	-1.03315	2.10951	6.76811	5.47419	-10.4586	-10.6985	1.71959	-11.3259	-5.06143	-2.48204	0.179311	-8.73307	-8.47081	1.78168	10.1482	-7.37657	6.65536	-1.80999	-4.14203	-1.65552	29.0727
710	-5.10166	20.2055	-7.53701	-10.7283	-7.23153	-3.86536	0.538925	2.74231	4.19766	7.70092	-6.79692	-5.98381	-1.7032	0.710785	6.53217	4.97897	-10.5749	-10.6667	1.31677	-11.3363	-5.27501	-2.42889	0.38892	-8.93921	-7.94679	2.37524	9.62913	-6.89228	6.24607	-2.43982	-4.10974	-1.89543	26.8261
712	-4.81009	20.2497	-8.39531	-11.3055	-7.96864	-4.59254	-0.504156	1.84029	3.02047	6.62357	-6.70155	-6.08613	-1.55121	-0.727673	5.95649	4.03821	-11.2871	-11.003	0.408292	-11.8141	-6.01163	-3.10342	-0.221034	-10.1581	-8.29349	2.75324	8.5627	-6.61065	5.11607	-1.62323	-3.62148	-1.71363	25.0856
714	-4.29451	20.7509	-7.95275	-11.2012	-7.42128	-4.36952	-0.320375	1.61976	2.89728	6.80884	-6.41694	-5.42104	-0.350177	0.17037	6.14723	3.82364	-11.1515	-10.7462	0.390907	-11.5643	-5.92023	-2.88536	-0.60151	-9.74735	-8.41667	2.91367	8.23637	-5.91526	5.19753	-1.79807	-2.86152	-1.55469	23.7271
716	-3.64184	21.7155	-6.29177	-10.7388	-6.73433	-3.38852	0.665088	2.33253	3.66072	7.97759	-6.18448	-4.77334	1.10666	1.4926	6.48946	4.42167	-10.4234	-10.1124	1.05103	-10.8729	-5.15382	-1.88152	-0.21408	-8.57959	-8.13007	2.6539	8.93176	-4.93973	6.16113	-2.4731	-2.07971	-1.76976	22.5107
718	-3.71983	22.317	-5.73496	-10.5972	-5.78761	-2.9246	1.46776	3.1804	4.20163	8.61883	-6.14226	-4.70479	0.750522	1.31081	6.59277	5.01027	-9.85861	-9.73096	1.57903	-10.4825	-4.5384	-0.875195	0.613928	-8.37098	-7.46747	2.34544	9.76175	-4.61141	6.62754	-1.15633	-2.99364	-1.88003	21.704
720	-4.62631	22.3537	-6.63449	-10.7919	-4.25676	-3.71287	1.20948	2.97179	3.77844	7.99199	-6.81778	-5.16176	-1.51793	0.872215	6.37372	4.67201	-9.98229	-9.8139	1.33216	-10.6146	-4.71075	-0.921389	0.543395	-8.41518	-7.14163	2.55356	9.71208	-5.19256	6.02851	-0.461936	-5.05348	-1.63913	20.9595
722	-5.41707	21.9956	-7.84298	-12.1266	-4.99586	-5.86907	0.0615915	1.87059	3.09298	6.91563	-7.76748	-4.61986	-2.29776	0.887116	5.88099	3.74019	-11.0959	-10.8108	0.442068	-11.6522	-5.67635	-2.0648	-0.674526	-8.88954	-8.95907	2.35488	8.97249	-6.18597	5.26756	-1.36793	-4.27415	-1.54525	20.0853
724	-5.61823	21.4716	-7.77592	-13.4856	-7.42227	-7.31349	-0.219544	1.45882	3.26882	6.86496	-8.49217	-3.21219	-1.62969	1.1459	5.98282	3.39597	-11.911	-11.7103	0.104308	-12.5527	-6.21229	-2.57442	-1.2055	-8.9397	-10.8838	1.50849	8.46436	-6.93252	5.40813	-3.18885	-2.08815	-1.57555	20.0982
726	-5.26607	21.3956	-6.67473	-12.5428	-8.48422	-6.68367	0.42965	1.72953	3.64582	7.14809	-8.62877	-2.84513	-1.49856	0.889103	6.87987	3.52015	-11.7436	-11.3313	0.358124	-12.2701	-6.03795	-2.47906	-0.747045	-8.24084	-10.2793	1.74741	8.05259	-7.08898	5.65598	-3.9051	-1.93169	-1.47969	20.7136
728	-4.93179	21.8734	-6.44575	-10.4144	-8.59499	-5.07434	0.50962	1.79062	3.55045	6.65834	-7.92593	-3.95377	-0.573198	-0.378986	7.15951	3.44962	-11.5549	-10.5957	0.354151	-11.7471	-6.03894	-3.04431	-0.329812	-8.74946	-8.6983	2.93702	7.70887	-7.01249	5.2318	-1.10517	-3.94136	-1.39723	20.2497
730	-4.97897	22.845	-6.57489	-9.32018	-7.56582	-4.24087	0.626346	1.93069	3.68406	6.57439	-7.33982	-5.02765	0.706812	-1.42753	6.71893	3.52561	-11.3338	-10.2331	0.446538	-11.4684	-5.97288	-2.84314	-0.0943739	-9.06289	-8.12709	3.70244	7.94629	-6.64343	5.18908	0.939766	-5.43296	-1.507	18.6866
732	-4.68493	23.9179	-6.08712	-9.20743	-5.24471	-4.96507	1.48316	2.21829	4.07845	7.02391	-6.77009	-4.97848	0.985463	-1.0396	6.88583	3.85344	-10.86	-9.98179	0.906984	-11.1585	-5.52684	-0.975033	-0.133614	-7.75158	-7.991	3.89864	8.594	-5.72552	5.51194	-0.435611	-4.19716	-1.86314	17.0683
734	-4.20511	24.0723	-5.65698	-9.68277	-4.46538	-6.00169	1.78218	2.08666	4.07547	6.71446	-5.95351	-4.32134	0.503163	0.436107	7.51664	3.83606	-10.7974	-10.0593	0.936786	-11.1649	-5.50946	-0.00347706	-0.652174	-7.01497	-7.75903	3.73522	9.05643	-5.10017	5.05547	-2.16365	-2.83668	-1.9595	15.9249
736	-4.6735	22.7173	-6.10203	-10.8957	-5.6843	-6.32256	1.17918	1.57108	3.4824	5.67089	-5.93861	-4.09683	-0.546873	1.72456	7.77046	3.33935	-11.2971	-10.7427	0.415743	-11.7446	-6.02156	-0.671049	-1.30137	-7.97311	-8.18769	3.90013	8.98043	-5.83728	4.05908	-2.37674	-3.65674	-1.46081	15.5687
738	-5.67436	20.7106	-7.07706	-11.9776	-6.44773	-6.2262	0.830988	1.35849	2.87394	4.95017	-6.56744	-3.71138	-1.10914	1.90785	7.60108	2.83966	-11.6577	-11.4078	0.242889	-12.3466	-6.23763	-0.911454	-1.47124	-9.27846	-9.76573	4.60496	8.62976	-7.07606	3.58572	-1.64012	-3.97861	-1.03364	15.5742
740	-5.32667	20.4022	-7.18633	-11.3904	-6.82225	-5.42353	1.25666	2.07225	3.01401	5.57154	-6.23316	-2.46515	0.282625	1.22587	7.60804	2.97427	-11.3303	-11.0855	0.905494	-12.1554	-5.72552	-0.563761	-0.535448	-9.61175	-10.7909	4.83592	8.52098	-6.3469	4.08788	0.215074	-2.76963	-1.47223	14.3394
742	-3.7382	21.7751	-5.84573	-9.46522	-7.87427	-3.60807	1.82639	3.18636	3.29316	6.85702	-5.25514	-2.70208	2.36928	1.14689	8.06649	3.52313	-10.5858	-9.95199	1.74542	-11.1481	-4.89404	-0.72966	1.02172	-8.50211	-9.2119	4.80711	8.669	-4.10974	4.78377	1.63565	-3.39697	-2.29379	12.0367
744	-3.14862	22.3527	-4.65413	-8.83291	-8.61983	-2.81533	1.87904	3.43472	3.01798	7.31001	-4.88063	-4.89056	2.5183	1.65751	8.46386	3.59813	-10.3742	-9.35097	1.90238	-10.6479	-4.63923	-1.27902	1.3113	-7.38502	-7.4635	5.30531	8.79616	-3.56138	4.79867	0.602504	-4.77085	-2.21332	11.1083
746	-3.68456	22.3016	-4.97997	-10.1874	-7.87775	-4.25229	1.62075	3.14862	2.76615	7.35571	-5.06043	-4.82351	0.991921	1.61727	8.33472	3.5574	-10.6777	-9.69221	1.81198	-11.0631	-4.82649	-1.57803	0.442068	-7.04328	-8.26518	5.25365	8.91934	-4.72367	4.57962	-0.170867	-3.26832	-1.4931	11.5434
748	-3.73274	23.1644	-6.09457	-11.3835	-5.94109	-5.37435	2.03302	3.6329	3.21865	8.00937	-4.84039	-2.49992	0.425676	1.34061	8.34813	4.18276	-10.5272	-10.0469	2.42541	-11.2424	-4.51356	-1.04358	0.502169	-7.02093	-9.14782	4.8692	9.18756	-5.25266	5.00679	1.40816	-1.62025	-1.47174	10.9936
750	-3.48836	23.6606	-6.92755	-11.3502	-5.61178	-4.74701	2.85606	4.36852	3.69747	8.77331	-3.78291	-2.31365	1.51445	1.16378	8.9094	4.79519	-10.1695	-10.1472	3.25491	-11.0934	-3.9945	-0.249843	1.18315	-7.91202	-8.20607	5.86758	9.27548	-5.09471	5.56856	2.46813	-2.87245	-1.95801	9.89983
752	-3.89417	23.1703	-6.4974	-10.6538	-6.30816	-4.06603	2.95788	4.29948	3.4079	8.8498	-3.97613	-3.40591	1.78268	1.35501	8.97646	4.62184	-10.1229	-10.0782	3.43819	-11.0025	-3.91454	-0.0829499	1.00136	-8.07842	-7.38402	6.62257	8.79814	-5.3515	5.35945	-0.488261	-3.94036	-1.8388	10.245
754	-4.64469	23.45	-5.5179	-9.57747	-4.05411	-3.4526	2.89728	4.35362	3.16848	8.78622	-5.84324	-3.85046	0.572701	1.46677	8.28008	4.51555	-9.70215	-9.59635	3.58423	-10.5346	-3.61453	0.311931	1.0396	-6.62009	-7.04328	5.58148	8.52148	-5.68976	5.18312	-4.27018	-3.4228	-1.42207	10.6682
756	-4.50313	24.3609	-5.61227	-8.50409	-1.75238	-1.66396	3.38107	5.31326	3.66966	9.41058	-6.43233	-4.46389	0.525514	1.00931	8.12958	5.22733	-8.84136	-8.98391	4.28607	-9.77218	-2.8193	1.056	2.33004	-6.19541	-6.00914	4.80513	9.17315	-5.04504	5.81791	-3.2112	-3.70642	-1.64956	8.9854
758	-3.32793	24.2929	-6.17653	-8.84483	-3.91155	-0.906487	3.38058	5.7146	3.81271	9.79205	-5.43793	-4.44005	1.67787	1.0252	8.43207	5.59638	-8.86917	-9.07232	4.4773	-9.83626	-2.70953	0.891089	2.86649	-7.33783	-5.89689	4.83543	9.77963	-3.99798	6.10948	0.459452	-3.98358	-2.17557	6.61164
760	-2.54164	23.3273	-5.72403	-10.2823	-6.9648	-2.7741	2.72791	4.90844	3.03785	9.197	-4.52797	-3.88026	2.3221	1.06245	8.20359	5.04255	-9.73244	-9.59535	3.83407	-10.5987	-3.48787	0.251333	1.7946	-7.53949	-7.6289	4.94818	9.79851	-4.02729	5.42402	1.19507	-3.06616	-2.10653	5.8954
762	-2.76764	22.8092	-4.59701	-10.6027	-6.70056	-4.66158	2.59131	4.23094	2.53022	8.55426	-5.15779	-3.64184	1.93963	0.651677	7.96964	4.59055	-10.0469	-9.56655	3.47346	-10.7596	-3.82264	0.394881	0.871718	-6.4825	-8.44449	5.19107	9.79801	-4.824	4.80115	-0.508627	-2.20239	-1.61082	6.1363
764	-3.14464	23.0243	-4.56274	-10.7547	-5.00629	-4.76589	2.9698	4.16289	2.99662	8.46485	-6.51032	-2.48104	0.929336	1.1305	8.35458	4.6129	-9.88046	-9.57052	3.62049	-10.5952	-3.60658	0.887612	0.696381	-6.47455	-7.90606	5.42204	9.64304	-5.33809	4.88013	0.0526508	-1.90089	-1.51992	5.87404
766	-2.93106	23.7351	-5.68926	-11.8737	-4.13458	-4.57168	3.05722	4.20908	3.6185	8.56618	-5.9709	-0.887116	1.6133	1.87705	8.73903	4.80761	-9.97484	-10.0846	3.70443	-10.8307	-3.56783	0.76741	0.64373	-7.74115	-8.1569	5.31574	9.34452	-5.09322	5.10712	3.0453	-2.02904	-1.89145	5.23329
768	-2.46714	24.7513	-6.20236	-11.6328	-4.95662	-4.87765	2.87145	4.20709	3.60459	8.68092	-4.74006	-1.69675	3.57429	1.31826	8.58953	4.92583	-10.2997	-10.2008	3.49929	-11.0537	-3.75609	0.121693	0.692407	-8.7594	-8.22296	4.69337	9.28342	-4.31836	5.18113	4.71274	-3.19034	-2.1557	4.41025
770	-2.52227	25.5734	-5.16574	-9.89288	-7.16299	-4.72019	2.80241	4.1316	3.30557	8.81702	-4.89155	-3.94533	3.26435	0.393887	8.13256	4.72267	-10.5143	-9.75629	3.26137	-10.9494	-3.9344	-0.463923	0.897547	-8.74798	-7.29511	4.16239	9.20792	-3.79781	5.32717	3.5579	-5.51194	-2.00321	3.37909
772	-3.00556	25.7552	-4.01785	-9.35147	-7.83851	-4.58807	2.70853	3.84649	2.95391	8.58257	-5.31773	-4.36604	0.839432	0.47634	7.47194	4.35909	-10.6633	-9.72847	3.06467	-11.0318	-4.17729	-0.680486	0.760953	-7.99696	-7.40687	3.4367	9.00725	-3.85145	5.22286	0.715753	-6.22372	-1.79857	2.38965
774	-3.23802	24.6455	-4.75893	-10.3995	-6.56545	-4.8389	2.55356	3.57876	2.7284	8.1867	-5.26359	-4.05411	-0.904004	0.983477	7.37558	4.21902	-10.8932	-10.4606	2.99315	-11.5588	-4.40925	-0.376503	0.46293	-7.97907	-8.6834	3.09298	8.91785	-4.59949	5.05	-1.08729	-4.76241	-1.9441	2.02606
776	-3.2415	23.1107	-6.59873	-11.5365	-6.04937	-4.86275	2.36084	3.543	2.81781	8.12461	-5.47369	-4.77036	-1.13298	0.903507	7.85242	4.32978	-11.154	-11.0413	3.0612	-12.0024	-4.53542	-0.0819564	0.47485	-8.72761	-9.37134	4.10875	9.02265	-5.76278	5.24471	-1.75834	-3.71238	-2.06977	2.40505
778	-3.25193	22.4451	-7.95722	-12.6511	-8.19812	-5.54025	1.4926	3.09696	2.62707	7.7337	-5.37386	-4.74801	-0.619888	0.181297	7.49032	4.09732	-11.917	-11.4014	2.53369	-12.5269	-5.27054	-1.25567	-0.0134111	-9.56704	-9.8298	4.27316	8.88954	-6.38415	5.11607	-1.86563	-3.01152	-1.88996	2.61068
780	-3.09	22.6473	-8.44896	-13.2392	-11.1287	-6.33299	0.624855	2.57293	2.54313	7.32293	-4.73211	-3.25938	-0.142555	-0.0526508	6.80288	3.60161	-12.6133	-11.5464	1.82192	-12.9407	-6.10401	-2.95887	-0.492235	-10.0782	-10.1551	3.1968	8.32131	-5.87652	5.07385	-1.44094	-2.09858	-1.82986	1.93367
782	-2.82774	23.1847	-8.17825	-12.3312	-11.081	-5.21491	1.07636	3.09249	3.37362	8.05507	-4.91738	-3.31551	0.694394	0.655651	7.0701	3.69698	-12.0347	-10.8793	2.19196	-12.3555	-5.63214	-2.91069	0.493725	-9.55909	-8.86371	3.18239	8.02328	-4.71026	6.06577	-1.21395	-2.95142	-2.22623	0.649194
784	-2.98719	23.0998	-7.69397	-11.5141	-8.07246	-3.85344	1.88897	3.75311	4.07398	8.90295	-6.03994	-5.22236	1.41114	1.16726	7.31051	3.95974	-11.2245	-10.2848	2.86649	-11.7138	-4.85679	-1.58101	1.52191	-8.88606	-8.04563	3.42727	8.06997	-4.33574	6.94444	-1.62125	-4.86225	-2.54959	-0.249346
786	-4.10229	22.3925	-7.46002	-11.4962	-5.84026	-4.88708	1.82639	3.35375	3.84947	8.65112	-7.14709	-6.12388	0.402331	0.358125	6.65238	3.8137	-11.4898	-10.6374	2.68469	-12.0352	-5.16872	-0.624359	0.731647	-8.79566	-10.0245	2.5332	8.07444	-5.49306	6.69807	-3.25739	-4.72963	-2.1552	0.137091
788	-5.42104	22.3403	-7.4476	-10.7308	-7.1158	-6.52472	1.3118	2.76069	3.34134	8.00292	-7.14113	-6.04987	-1.12454	-1.17024	6.28332	3.82463	-12.1668	-11.1292	2.0509	-12.5512	-5.89093	-0.810623	-0.535945	-9.10709	-11.1108	2.36829	8.40227	-6.47604	5.98828	-4.0397	-4.05361	-1.67936	0.663598
790	-5.13792	24.194	-6.57688	-9.347	-9.42647	-6.41843	1.01129	2.72046	3.25243	7.63287	-5.96195	-5.05894	-1.64459	-1.32322	6.94642	4.08391	-12.2269	-10.8893	1.67489	-12.3923	-6.18994	-1.76231	-0.661612	-9.31372	-9.17315	3.85294	9.02166	-5.20547	5.55764	-2.86202	-4.53542	-2.06133	-0.467896
792	-3.3319	27.0193	-5.80897	-9.57002	-10.2763	-6.06775	0.541409	2.55058	3.38654	7.46548	-4.48177	-3.16252	-0.94821	-0.456472	7.31001	3.8594	-12.2666	-10.6658	1.31379	-12.2279	-6.54161	-2.97377	-0.612934	-10.0454	-8.15193	4.78725	8.99732	-3.03636	5.45532	-0.416736	-4.34319	-2.69264	-2.62956
794	-2.34246	28.1672	-7.12822	-11.758	-9.39916	-6.92556	-0.370045	1.79261	3.02543	7.38303	-4.21554	-2.30173	-0.568728	-0.0854332	6.4378	3.15756	-12.8989	-11.233	0.635783	-12.7494	-7.22458	-3.80923	-1.41958	-11.6453	-9.50495	3.80526	8.08835	-2.99613	5.37435	1.67042	-3.00805	-2.42194	-3.70045
796	-3.28819	26.9726	-8.36203	-13.1021	-6.70503	-7.51863	-0.619392	1.36544	2.43684	7.53204	-6.0911	-2.78701	-2.06182	0.121196	5.57154	3.00209	-12.9903	-11.6294	0.363588	-12.9287	-7.32789	-3.24547	-1.93218	-11.2424	-10.703	2.72095	7.538	-4.92185	5.38379	-0.365575	-1.72804	-1.659	-3.36121
798	-4.37895	25.1765	-7.66019	-12.21	-6.21329	-6.53913	-0.372529	1.96745	2.22027	8.11815	-7.30008	-3.69002	-1.7037	0.161926	5.64257	3.97017	-12.4966	-11.377	0.6785	-12.4648	-6.90122	-2.89232	-1.04855	-9.19352	-10.0722	2.87245	8.43008	-6.04838	5.63115	-3.49333	-2.52326	-1.71512	-3.7382
800	-3.99599	24.3862	-6.97772	-10.2957	-9.95447	-4.93824	-0.565747	2.67575	2.41995	8.74201	-5.78215	-4.52151	1.29888	0.0342727	5.98778	4.97699	-12.5791	-11.1197	0.730157	-12.292	-6.93649	-4.06901	0.0596047	-9.32614	-7.8852	3.0001	9.42945	-5.46426	5.97537	-2.03898	-4.81655	-2.52326	-5.70615
802	-3.37213	24.1309	-7.45356	-9.55264	-11.4868	-4.33375	-0.357131	2.60721	3.10143	9.02762	-4.88857	-5.12054	2.02209	0.391901	6.22024	5.04802	-12.9268	-11.0785	0.556807	-12.4708	-7.25389	-4.29948	0.103812	-10.6335	-6.72986	2.79595	9.34551	-5.04553	6.41594	0.110765	-5.22633	-2.69214	-6.52075
804	-3.75112	23.8429	-7.79778	-11.083	-9.15726	-4.60496	0.29852	2.31216	3.91205	9.2268	-6.51628	-4.88559	0.185271	0.717739	6.37025	4.86275	-12.9208	-11.1078	0.628829	-12.5756	-7.27127	-3.14464	-0.290076	-10.4313	-8.09828	2.9395	9.24269	-5.75085	6.92308	-1.33713	-3.31402	-1.87407	-5.21541
806	-3.9801	24.4002	-7.1307	-12.6243	-8.65807	-4.08292	0.457466	2.48849	4.59502	9.43691	-7.35869	-3.26633	-1.10914	0.822544	6.61562	4.97798	-12.7022	-10.9876	0.871718	-12.4852	-7.05719	-2.67476	-0.114739	-9.57449	-9.58095	3.30756	9.60728	-5.94209	7.32193	-3.16203	-1.92324	-1.38481	-4.66555
808	-3.40939	25.8918	-6.18051	-11.9368	-10.334	-3.16948	0.224511	2.68916	4.93179	9.57449	-6.00864	-2.59727	-0.875195	1.53581	6.99858	4.9452	-12.4231	-10.6146	1.00484	-12.1598	-6.88235	-2.92609	0.130137	-9.34104	-8.99136	3.64681	9.55462	-4.86622	7.39445	-3.21468	-2.3514	-1.80105	-6.20733
810	-3.07212	27.0471	-6.09408	-10.7894	-11.2772	-4.16289	-0.118713	2.34842	4.37746	9.38624	-4.71721	-3.44912	0.037253	1.91828	7.05173	4.53442	-12.4897	-10.402	0.767907	-12.0282	-7.04626	-3.20574	-0.456472	-9.68725	-8.57164	3.60608	9.03408	-4.18921	6.86844	-2.13385	-2.54611	-2.11646	-7.65026
812	-3.39051	26.4371	-7.30852	-11.2866	-10.1944	-5.9401	0.00546392	2.20388	3.72281	9.2268	-5.1866	-3.39299	-0.147521	1.05103	7.12027	4.44104	-12.5463	-10.481	0.591079	-12.1156	-7.09345	-2.77609	-1.02669	-10.1139	-9.73443	2.95589	8.93176	-4.84238	6.43184	-1.02222	-2.2466	-1.89543	-7.12673
814	-3.52015	24.4483	-8.37396	-12.0526	-7.91997	-6.22918	0.762939	2.93404	4.10875	9.85364	-6.40452	-3.04182	-0.572701	0.101825	7.73023	5.07683	-11.8777	-10.2828	1.07189	-11.7565	-6.41594	-1.74691	-0.375509	-9.99272	-9.69966	2.98222	9.38574	-5.51591	6.94394	-1.20749	-2.88089	-1.87308	-6.01659
816	-2.96384	23.2379	-7.95225	-11.4719	-6.90868	-4.95066	1.44541	4.09087	5.09222	10.8043	-6.70304	-3.61403	0.64224	-0.394384	8.27362	5.95649	-10.9091	-9.68029	1.89493	-10.8788	-5.41359	-1.23084	1.1151	-9.57052	-7.99398	4.297	10.0578	-5.16077	7.79927	-0.619888	-4.28408	-2.31614	-6.10799
818	-2.46366	23.7023	-6.70155	-9.77268	-6.83814	-3.37362	1.66645	4.78228	5.43793	10.8962	-6.26941	-4.58111	1.63962	-0.427167	7.8996	6.33846	-10.257	-8.88904	2.36581	-10.0414	-4.78327	-1.09375	1.94013	-8.98341	-6.6027	5.02666	10.6022	-4.40826	7.82907	1.7186	-5.27004	-2.6236	-6.88136
820	-2.35041	24.9997	-5.50548	-8.0511	-5.84622	-3.24448	1.46131	4.62582	4.94669	10.3051	-5.3828	-4.60247	0.975529	0.620385	6.859	6.10203	-9.92368	-8.06053	2.36829	-9.44982	-4.60694	-1.04755	1.4166	-7.97212	-6.1805	3.99301	10.5679	-3.81619	7.08699	3.33389	-4.68493	-2.39263	-7.27624
822	-2.33104	26.013	-5.05497	-8.18372	-4.5384	-4.19517	1.42455	4.26869	4.63376	10.1243	-4.18723	-2.97924	0.0665586	2.13931	6.52522	5.6535	-9.81241	-7.72923	2.39561	-9.27051	-4.51108	-1.21345	0.680983	-7.60903	-6.68714	3.08752	10.0454	-3.75857	6.75023	3.845	-3.74218	-2.02556	-7.3726
824	-2.13037	26.8752	-4.99239	-9.18508	-4.07745	-4.82996	2.06182	4.38342	4.99586	10.4696	-3.48588	-1.0103	-0.187258	2.63552	7.39048	5.40962	-9.73592	-7.7635	2.85556	-9.28243	-4.297	-1.19358	0.648201	-7.56333	-7.31299	3.90559	9.69768	-3.96917	7.18335	2.73933	-3.07113	-1.97341	-7.7486
826	-1.41958	27.9233	-4.08093	-8.5026	-4.13507	-4.59601	2.82129	5.07236	5.63761	11.0954	-4.18077	-1.05699	-0.122686	1.54922	8.20657	5.62072	-9.21537	-7.22259	3.66867	-8.80063	-3.76105	-0.798205	1.36743	-6.2421	-6.73284	4.81308	9.85265	-3.4377	7.93685	-1.35899	-2.76913	-2.19444	-8.31634
828	-1.05401	28.3405	-3.00457	-7.51466	-4.7182	-4.2359	3.05822	5.6386	5.91427	11.7451	-5.26508	-2.9857	0.568728	0.462929	8.14249	5.7434	-8.73953	-6.60866	4.23441	-8.31286	-3.26832	-0.42369	1.97639	-5.08428	-5.88248	4.67002	9.81539	-2.79943	8.4425	-4.58509	-3.25938	-2.26001	-8.16633
830	-1.52191	28.185	-2.98719	-7.613	-6.07967	-4.14203	2.95937	5.76327	5.76327	12.1718	-4.74999	-3.2569	1.41909	0.878175	8.05358	5.56707	-8.78771	-6.71943	4.37647	-8.45641	-3.15656	-0.252326	2.02308	-5.49505	-6.14425	4.1465	9.72499	-2.63552	8.5026	-2.83321	-2.55108	-2.16961	-7.61201
832	-1.94808	27.7708	-3.14862	-7.86483	-5.73347	-2.91367	3.11087	6.26842	5.82834	12.3595	-3.56138	-2.01811	1.03662	1.85817	8.6983	5.85119	-8.43058	-6.85751	4.69585	-8.35756	-2.76218	0.368556	2.6832	-5.78364	-6.26743	4.09931	10.3717	-2.8948	8.56221	0.296533	-1.72506	-2.37127	-7.7943
834	-2.34892	26.5737	-3.38356	-8.48422	-3.50972	-1.40717	3.25491	6.73831	5.60979	11.8727	-3.66022	-2.3216	0.11921	1.94311	8.83937	6.1209	-7.96268	-7.05272	4.9909	-8.17925	-2.33352	1.32372	3.49532	-5.92073	-6.07173	4.42763	10.8873	-3.8301	8.26865	0.960628	-2.92708	-2.56995	-8.64615
836	-2.5481	25.1705	-4.1763	-9.2417	-3.53008	-1.30137	2.90672	6.40005	4.58856	11.0557	-4.30048	-3.49581	0.0476837	0.999371	7.99	5.67834	-8.3526	-7.62691	4.7495	-8.62877	-2.61416	1.31826	3.16997	-7.12325	-6.10203	4.31587	10.473	-4.29948	7.57078	1.27008	-4.49469	-2.412	-9.67085
838	-2.08815	24.9356	-4.33425	-9.00626	-5.32717	-2.16166	2.81334	5.98629	3.88275	10.8639	-4.7634	-3.59664	0.891586	0.330309	7.58568	5.28743	-8.71172	-7.70936	4.58012	-8.85377	-2.89182	0.863771	2.33054	-7.39296	-6.20882	3.97712	9.93907	-3.61701	7.37309	0.556807	-3.92149	-2.22822	-10.3583
840	-1.20054	26.082	-4.20411	-8.28505	-6.2724	-2.59131	3.37809	6.06825	3.98904	11.1813	-4.83692	-3.14762	2.04245	0.0943741	7.86632	5.34554	-8.44449	-7.27971	4.89503	-8.54383	-2.639	1.08679	2.08418	-6.66479	-6.2411	3.88026	9.7995	-2.40405	7.58767	-1.76628	-1.80105	-2.49098	-10.9285
842	-0.507633	27.5011	-4.2518	-7.68552	-6.51727	-1.79609	3.94732	6.558	4.15842	11.307	-3.9344	-3.73373	2.60174	0.0750025	8.10176	5.59688	-7.97957	-6.8292	5.46028	-8.15292	-2.11596	1.53234	2.84612	-6.63002	-5.22087	4.32581	9.96143	-1.86066	7.50075	-1.7494	-1.76479	-3.03537	-11.2419
844	-1.12752	28.1731	-3.38256	-7.34478	-5.94556	-1.357	4.30594	6.95437	3.79781	10.8192	-3.69449	-4.27167	2.22524	1.21742	8.28753	5.85119	-7.63088	-6.51181	5.93364	-7.90258	-1.64807	1.86761	3.60211	-5.96841	-4.30644	5.48363	10.4656	-2.83271	6.89278	-1.2507	-2.95391	-2.8496	-10.5734
846	-2.33452	28.2298	-2.85655	-7.7044	-4.75744	-2.45223	4.2821	6.52919	3.12974	10.033	-4.63078	-3.62148	1.62721	3.04878	8.56916	5.62916	-7.76947	-6.84063	5.85665	-8.20359	-1.72357	1.72704	3.08156	-5.37435	-5.07037	6.37968	10.6469	-3.83059	6.27538	-2.57492	-2.83619	-2.11199	-10.1288
848	-2.21779	28.5814	-3.75211	-8.62976	-4.45743	-3.53406	3.85592	5.74837	3.08404	9.64254	-4.80016	-2.67824	1.40369	3.71933	8.77778	5.14587	-8.32727	-7.70489	5.52932	-8.91984	-2.2009	1.07686	2.09957	-6.79592	-6.42935	6.15666	10.0737	-3.2569	6.31164	-2.15868	-2.55158	-2.04941	-11.1237
850	-1.26312	29.0523	-4.80662	-9.47813	-5.60929	-3.13868	3.55591	5.52237	3.55939	9.50098	-4.24534	-2.23617	1.26312	2.42392	8.80609	4.86424	-8.8041	-8.34813	5.48611	-9.43492	-2.52078	0.607967	2.05934	-8.62728	-7.18286	5.54323	9.52284	-2.44677	6.64641	0.127653	-2.78552	-2.48998	-12.0396
852	-1.24574	28.3629	-6.15418	-11.1635	-6.69459	-3.23604	3.44266	5.20796	3.619	8.97894	-4.40478	-1.66992	0.613431	0.762939	8.59996	4.3566	-9.41455	-9.10858	5.3525	-10.1636	-2.91069	0.416239	1.98931	-9.07928	-8.96354	5.20845	9.33756	-3.29614	6.5123	1.20004	-1.3123	-2.46018	-11.7376
854	-1.85867	26.7188	-7.81367	-13.0902	-5.96394	-4.14153	3.62198	4.72367	3.61105	8.52942	-5.3063	-1.3123	0.240902	0.371039	8.50509	3.74665	-9.90629	-9.91722	5.27451	-10.8764	-3.20474	0.688434	1.33663	-8.45492	-10.9658	5.13246	9.46075	-4.42614	6.38763	0.928342	0.541409	-2.15868	-11.4466
856	-1.57754	25.483	-7.73023	-12.0237	-3.72231	-3.43472	4.4172	5.03063	4.54783	9.08772	-5.37088	-2.62857	1.055	0.897547	8.95808	3.83009	-9.30031	-9.52135	5.88248	-10.3439	-2.70953	1.3719	1.49558	-7.20968	-9.16471	5.46128	9.8447	-3.81668	7.17441	0.994404	-1.35799	-2.40604	-11.993
858	-1.0555	24.9803	-6.11891	-9.53674	-2.79496	-2.66731	5.03808	5.49356	5.85218	9.89636	-4.55826	-4.82748	2.12441	1.60933	9.56903	4.26024	-8.61685	-8.65459	6.407	-9.52333	-2.25107	1.46627	2.11398	-6.46263	-6.26743	5.53479	10.0618	-3.03437	8.14795	1.20997	-4.62582	-2.97129	-12.6868
860	-1.58648	25.2863	-4.88758	-8.69085	-4.03672	-2.77559	5.15481	5.6083	6.69658	10.2411	-4.49121	-5.6535	2.12888	1.31081	10.0528	4.40677	-8.67893	-8.37992	6.44277	-9.47118	-2.32259	1.10169	2.31514	-6.79841	-5.76625	5.50598	10.1159	-3.65476	8.69483	0.275175	-5.83977	-2.95937	-12.6392
862	-2.72046	25.9742	-4.67102	-9.04153	-5.25812	-2.91864	5.19603	5.65847	7.08799	10.3682	-4.63078	-4.77384	1.2661	-0.150005	10.3295	4.2359	-8.94318	-8.48571	6.41445	-9.75629	-2.43733	1.09772	2.27541	-7.70738	-6.35684	6.06924	9.97782	-4.6735	8.99037	-0.812113	-5.37733	-2.36233	-12.3421
864	-3.28819	26.6254	-5.37088	-9.88841	-6.69658	-4.222	4.53293	5.13742	6.75768	9.92169	-4.15295	-4.25925	1.22339	-0.820557	9.87053	3.75162	-9.69072	-9.15627	5.84523	-10.5917	-3.05325	0.330309	1.63714	-9.2874	-7.57476	5.75831	9.13938	-5.00778	8.50409	0.0476838	-3.6781	-2.15967	-13.5163
866	-2.81433	27.6521	-5.31028	-9.79851	-7.55489	-5.09421	4.00941	4.82251	6.25203	9.55711	-3.71784	-4.21753	1.55419	-0.150998	9.51936	3.77645	-10.1238	-9.44038	5.32915	-10.9509	-3.53406	-0.449518	1.433	-9.25561	-8.16931	4.69536	8.59449	-4.35213	7.95176	0.951688	-1.87705	-2.56846	-15.2195
868	-2.3827	27.6412	-4.33077	-9.1508	-6.61264	-4.26968	4.4629	5.23577	6.37472	9.94305	-4.04666	-4.01338	1.01576	0.187755	9.94354	4.45048	-9.799	-9.0465	5.48611	-10.4288	-3.31849	0.0918906	2.10752	-7.30505	-7.81566	4.74354	8.97994	-3.7685	8.25475	0.00745036	-1.41611	-2.67426	-15.1475
870	-2.75572	25.9057	-4.87715	-10.176	-6.78947	-4.21057	4.17382	4.93874	6.41793	10.0508	-4.72565	-4.06603	0.989437	-0.248353	9.81788	4.448	-10.333	-9.52383	5.15282	-10.8778	-3.78986	-0.010431	1.76579	-7.52856	-8.66999	5.35796	8.93474	-4.39982	8.3968	-0.255307	-2.19146	-2.38369	-14.2664
872	-2.96583	25.5331	-6.35088	-11.2514	-8.13107	-4.55578	3.37213	4.29302	6.44227	10.0106	-4.54038	-3.55591	1.85072	-0.332296	9.51886	4.21007	-11.2424	-10.3489	4.46886	-11.8375	-4.61886	-0.960628	0.695388	-9.22134	-9.8149	6.01908	8.52744	-5.0654	8.25624	0.693401	-2.96185	-2.50588	-14.4536
874	-2.38518	27.4728	-6.84907	-10.2441	-8.72115	-3.6935	3.34581	4.47333	6.89824	10.4114	-3.75807	-2.72493	2.25802	0.225008	10.1343	4.84983	-11.2474	-10.2445	4.33127	-11.8107	-4.71423	-1.41362	0.556807	-9.4528	-8.55923	7.1163	8.70029	-4.26024	8.52446	1.43647	-3.76205	-3.07262	-15.829
876	-1.82589	28.2149	-6.89626	-9.30727	-8.52644	-3.41733	3.49234	4.73062	7.06712	10.8023	-3.71188	-3.31849	1.6138	1.17719	10.3871	5.64555	-11.079	-9.90232	4.28309	-11.5032	-4.6427	-1.31329	0.81708	-8.82149	-6.41743	7.17888	8.99235	-3.36021	8.79367	0.506143	-5.50002	-3.20474	-16.4409
878	-2.35091	26.4486	-7.53005	-11.4744	-8.21898	-5.11209	3.05325	4.37001	6.69112	10.9638	-4.73956	-3.71238	-0.00198673	1.75238	9.43095	5.79258	-11.7108	-10.555	3.75062	-12.1246	-5.13891	-1.35799	0.403325	-8.7445	-7.64132	5.04007	9.06934	-4.23541	8.72662	-1.82291	-5.23428	-2.62409	-15.1669
880	-3.468	24.4096	-8.24332	-14.1422	-7.71731	-6.35386	2.74082	4.2364	6.72489	11.2489	-5.54274	-3.27577	-1.07785	1.34905	8.62678	5.93563	-12.3337	-11.4769	3.36617	-12.9129	-5.58148	-1.50651	0.272691	-9.47366	-10.2868	3.27229	9.18259	-5.89987	8.86421	-2.24163	-2.87096	-2.20388	-13.9316
882	-3.95377	23.8905	-7.88122	-13.0882	-6.9648	-5.79606	3.41286	4.87864	7.85738	12.141	-5.25564	-3.82513	0.000993315	1.0396	9.23971	6.83119	-11.985	-11.306	3.76503	-12.6695	-5.28644	-1.18067	0.914931	-10.1422	-9.62863	4.09434	9.53575	-6.47058	9.77516	-0.830988	-2.72691	-2.47608	-14.4497
884	-3.64383	25.0205	-7.22259	-10.9588	-8.26518	-5.8497	3.70393	5.01821	8.57015	12.6342	-4.75744	-3.97762	1.10368	1.30584	10.1298	7.4471	-11.9825	-10.9404	3.73026	-12.507	-5.46475	-1.52091	0.624855	-10.6196	-8.09977	5.38031	9.62615	-5.9709	10.2604	0.0198684	-3.84847	-2.79049	-16.2537
886	-3.00258	26.5539	-7.29263	-10.8446	-10.4288	-7.04676	2.67824	4.2965	7.93189	12.0689	-4.71324	-3.51419	0.0874201	1.23928	9.84023	7.10885	-12.8696	-11.2096	2.79844	-13.0956	-6.39806	-2.71847	-0.452002	-10.782	-9.05345	5.27253	9.06239	-5.44836	9.65794	-0.416239	-3.90361	-2.58485	-17.3882
888	-2.68916	27.2617	-7.63535	-11.1376	-9.42449	-6.859	1.94659	4.41621	7.51267	12.061	-5.15381	-3.93242	-0.626842	0.548859	9.15627	7.27624	-13.0773	-11.3219	2.44379	-13.1975	-6.53615	-2.96732	-0.0889105	-10.3672	-10.1859	4.67549	9.19104	-5.60135	9.40412	-1.658	-4.49667	-2.26051	-16.9545
890	-3.02841	26.9289	-7.76152	-11.3914	-6.32902	-5.71261	2.15024	5.2159	7.95573	12.8478	-5.87205	-4.50412	0.435611	0.197689	9.02166	8.10176	-12.5617	-11.2772	2.77013	-12.8061	-6.0151	-2.29528	1.01974	-9.68178	-9.86954	4.23938	10.1964	-5.99523	9.85563	-2.48402	-5.65102	-2.34147	-16.0525
892	-3.57628	25.9176	-8.37098	-12.3382	-5.63065	-6.01908	2.10553	5.17716	8.34465	13.2774	-6.04888	-5.03759	1.09871	0.116726	9.03706	8.31981	-12.7291	-11.7938	2.60969	-13.0936	-6.24607	-2.44528	0.842909	-9.91474	-9.99024	3.84549	10.4646	-5.9858	10.1924	-1.05153	-5.41558	-2.5774	-15.3969
894	-3.77248	25.0051	-9.60628	-12.9913	-7.86881	-6.60419	1.69377	4.5682	8.19763	13.1001	-5.13196	-6.10749	0.462929	-0.272691	8.81404	7.86632	-13.3947	-12.3163	2.06729	-13.6296	-6.95139	-3.11484	0.105798	-11.3095	-10.4393	3.59664	9.82036	-5.74887	10.0647	1.86761	-5.17766	-2.47111	-15.2051
896	-3.65426	24.4096	-9.85662	-13.2049	-9.73046	-6.05732	1.71612	4.27018	8.01285	12.659	-4.12315	-6.35833	0.00546395	0.278652	8.59052	7.49181	-13.5635	-12.0655	1.84576	-13.4935	-7.15206	-3.07709	-0.040233	-11.6537	-10.4601	3.55989	9.26654	-5.80897	9.7394	2.11944	-5.50002	-2.20189	-15.6249
898	-3.49134	24.0455	-8.33968	-12.8955	-8.47081	-4.85977	2.69214	4.86076	8.5334	12.8905	-4.30097	-5.49108	0.0854335	1.39028	8.80062	7.83801	-12.7753	-11.1709	2.4875	-12.5671	-6.39359	-1.77821	0.663102	-9.4374	-10.1631	3.35574	9.60281	-5.88795	10.0389	-0.913938	-4.94172	-2.24958	-16.1454
900	-3.37213	24.3664	-6.29822	-11.5757	-5.126	-4.26819	3.77446	5.71509	9.045	13.4965	-4.99686	-5.35299	-0.13411	1.34259	9.35992	8.29995	-11.6716	-10.1949	3.4228	-11.5305	-5.37386	-0.0799695	1.44194	-6.98467	-9.81688	2.79645	10.2232	-5.41409	10.5535	-3.20425	-4.03523	-2.41796	-16.5522
902	-3.65327	25.4542	-5.86311	-10.8282	-5.12848	-4.87963	3.2112	5.42949	8.1102	13.1259	-4.82649	-6.32952	-0.446538	0.356635	9.22382	7.72178	-11.8434	-10.1666	3.16948	-11.6681	-5.71012	-0.581642	1.16626	-7.74215	-9.68029	2.98123	9.55611	-5.05447	9.93262	-1.94013	-3.16352	-2.32607	-17.2521
904	-4.16239	26.7843	-6.61413	-11.3954	-8.34217	-5.11308	2.07971	4.98096	6.76364	12.8408	-4.73013	-6.84659	-0.540912	-0.286102	8.86917	7.18435	-12.6347	-10.6563	2.51234	-12.3913	-6.45965	-2.23517	0.917415	-9.46472	-9.19749	4.5528	8.69234	-5.47816	9.08871	-0.978013	-2.66681	-2.13484	-17.9286
906	-4.45445	27.3431	-6.46015	-12.5627	-9.44734	-4.49767	2.08716	5.60333	6.62853	13.7071	-5.19405	-5.87006	-0.401338	0.376006	9.15676	7.83155	-12.5264	-10.7904	2.94646	-12.4325	-6.17603	-2.38021	1.56264	-8.82198	-9.0604	6.08762	9.33607	-6.49095	9.3773	-1.96298	-3.4228	-2.09113	-17.5446
908	-4.75248	26.3224	-5.92371	-13.638	-7.49975	-4.11471	2.412	6.31611	6.80337	14.4412	-5.09173	-5.18809	0.0307957	1.08033	8.895	8.44946	-12.0004	-11.013	3.68059	-12.1623	-5.6227	-1.5229	2.07971	-7.85589	-9.27796	5.88298	10.1611	-7.48088	9.83824	-0.34372	-5.1404	-2.23468	-16.3217
910	-4.90497	24.8238	-5.99176	-14.0637	-4.45942	-4.2965	2.47558	6.44575	6.28829	14.2728	-5.58446	-5.44737	-0.184278	0.419716	7.91798	8.35955	-11.6964	-11.2265	3.92795	-11.9746	-5.27849	-0.506639	1.9605	-7.79182	-8.97596	4.24832	10.2033	-7.59214	9.61075	0.534455	-6.27885	-2.25008	-15.6254
912	-4.33972	24.7171	-6.63002	-14.0235	-5.09818	-5.13891	2.07822	6.02255	5.21789	13.4746	-6.70701	-5.0505	-0.871221	0.0466902	7.25538	7.79629	-12.1539	-11.376	3.50873	-12.3794	-5.56558	-0.854333	1.36544	-8.52843	-9.45677	2.82427	9.82086	-6.70999	8.76486	-1.71214	-5.5179	-2.08219	-15.9507
914	-3.2266	25.7636	-7.3572	-13.2302	-9.56108	-6.05881	1.54525	5.73297	4.51108	13.0936	-6.3176	-3.73026	-0.485778	0.914931	7.2668	7.61996	-12.9412	-11.4595	3.07113	-13.0494	-6.21726	-2.55903	0.972052	-9.52979	-10.8158	2.68519	9.87798	-5.58247	8.24283	-2.13087	-3.50227	-2.22574	-16.7509
916	-2.42144	26.531	-7.10189	-11.6035	-10.6071	-5.44787	1.92175	6.47406	4.90546	13.7518	-5.45631	-2.9405	0.369052	1.42703	7.73321	8.3824	-12.5463	-10.7701	3.67314	-12.593	-5.89192	-3.04977	1.78913	-9.2566	-10.0349	3.04878	10.6285	-4.86672	8.81602	-1.08431	-3.34829	-2.61962	-17.3579
918	-2.51383	26.5847	-6.70801	-10.7512	-8.38935	-4.28657	2.43435	7.01745	5.26557	13.9361	-5.20498	-4.42962	0.832975	0.994404	7.915	8.64118	-11.8032	-10.1974	4.30793	-11.8549	-5.24918	-2.38568	2.64645	-9.21935	-8.0049	3.58969	10.7194	-4.84039	9.18508	-0.377993	-5.77917	-2.47955	-17.3435
920	-2.85109	26.7123	-7.25488	-11.3641	-7.84894	-4.48624	2.23269	6.46313	4.72019	13.0519	-4.74652	-6.26196	0.791748	0.294049	7.73023	7.98653	-11.98	-10.6141	4.16934	-12.1271	-5.32965	-1.92076	2.30074	-10.4527	-8.13752	4.4172	10.246	-5.26855	8.53091	0.716746	-6.40601	-1.95652	-17.0454
922	-2.78304	27.294	-7.41432	-12.1966	-7.66466	-5.22733	2.02904	5.81692	4.15246	12.3779	-4.27067	-5.69075	-0.322858	0.733634	7.62641	7.37409	-12.1345	-10.9494	4.11222	-12.3973	-5.35995	-1.51098	1.48763	-10.2316	-9.272	3.89566	10.0851	-5.58197	7.91003	0.491738	-3.03686	-1.77672	-17.0737
924	-2.86202	27.4261	-6.71049	-12.131	-7.13468	-5.92768	1.97887	5.55118	4.20362	12.3292	-4.14799	-4.52499	-0.656148	2.47707	7.77592	7.04924	-11.9319	-10.7845	4.1912	-12.2557	-5.13047	-1.69724	0.969072	-8.61088	-9.87848	2.87046	9.9649	-5.51442	7.96864	-0.831485	0.183284	-1.97788	-17.407
926	-2.94944	27.0794	-6.3469	-10.8168	-7.02888	-6.00219	2.19345	5.78562	4.58211	12.5617	-4.02878	-4.67648	0.150005	2.58982	8.14349	6.96927	-11.6115	-10.407	4.35561	-11.9766	-4.79072	-2.0057	1.42157	-8.40674	-9.68277	3.8291	9.95497	-4.82748	8.40773	0.282128	-0.316898	-2.28236	-17.786
928	-3.21766	26.4828	-6.79145	-9.95745	-6.09706	-5.43644	2.9857	6.04292	4.97897	12.6054	-3.77546	-4.80215	-0.483295	1.00533	8.3665	6.784	-11.2454	-10.0955	4.69933	-11.6607	-4.3422	-1.07586	2.00421	-9.20196	-9.21935	5.07782	10.1164	-4.44949	8.82099	1.68184	-1.79956	-2.10206	-17.1686
930	-3.64731	26.0408	-7.15752	-10.7144	-6.78698	-4.69138	3.63787	5.90285	5.52237	12.4017	-3.79731	-3.85791	-1.20898	0.201166	8.49615	6.4532	-11.0413	-9.94851	5.07087	-11.4347	-4.07646	-0.240902	1.93367	-9.13143	-8.76834	4.61191	10.1805	-5.00679	9.10858	0.379483	-2.67228	-1.75933	-16.0048
932	-3.38703	26.2941	-6.34144	-11.2717	-8.2612	-3.72678	3.96321	6.03199	6.27091	12.4579	-4.64569	-3.27726	-0.624855	0.224014	8.93871	6.38316	-10.5167	-9.44138	5.6237	-10.8322	-3.69151	0.0193716	2.22077	-7.65175	-7.43469	3.99848	10.2361	-5.44935	9.41604	-1.88152	-4.25229	-2.10057	-16.0431
934	-3.11782	26.2404	-5.41061	-11.0681	-7.54495	-4.24584	4.07	5.99374	6.61512	12.3953	-5.45035	-3.7839	0.279645	0.29703	9.18557	6.12736	-10.094	-9.14583	5.78314	-10.4229	-3.50922	0.189741	2.07275	-6.73433	-6.68665	4.23441	10.0732	-5.55068	9.50197	-2.82178	-5.05994	-2.58734	-16.5001
936	-3.61353	25.7581	-5.84225	-11.3289	-7.61151	-6.60419	3.59664	5.0207	5.98083	11.5822	-5.17617	-4.21653	1.14193	0.198682	8.65807	5.16872	-10.8937	-9.87848	4.9606	-11.1803	-4.25428	-0.472367	0.737111	-8.36651	-8.25326	4.26769	9.28144	-5.61923	8.7748	-1.63068	-3.67165	-2.44727	-15.9577
938	-4.20362	26.2727	-6.54707	-12.2488	-8.76933	-8.18719	3.13471	4.15196	5.06987	10.8093	-5.08924	-3.79284	1.22835	0.308951	8.02427	4.39932	-11.9517	-10.7427	4.18325	-12.1569	-5.06043	-1.14987	-0.240405	-10.0434	-10.4686	3.59813	8.48621	-5.46376	7.8852	-1.51495	-1.80652	-2.04841	-15.2672
940	-3.63837	27.8508	-6.5878	-12.6779	-9.27697	-7.18931	3.31352	4.42465	5.19504	11.0646	-4.93824	-2.99712	0.881652	1.22686	8.42611	4.7341	-11.9209	-10.7358	4.31885	-12.1663	-5.04057	-1.23084	0.219047	-10.2957	-10.5078	3.62843	8.56022	-4.95712	8.1117	-2.05239	-1.39823	-2.24411	-16.0997
942	-2.39958	28.6897	-6.29425	-11.6731	-9.17465	-4.46637	3.99798	5.38876	6.48101	11.9254	-4.38193	-3.60707	0.369052	2.22375	9.9048	5.39124	-11.1093	-9.92566	5.03063	-11.3333	-4.42068	-0.871221	1.50253	-9.82781	-8.36303	5.12004	9.10908	-4.75943	9.26803	-1.38382	-3.06666	-2.66383	-17.258
944	-2.02954	28.3673	-6.13431	-10.1422	-8.28952	-2.86996	4.42515	6.05981	7.39793	12.281	-4.6591	-5.48909	-0.359615	1.69277	10.709	5.58148	-10.5535	-9.17216	5.50697	-10.6553	-3.93987	-0.240902	2.41945	-8.85874	-6.63698	6.0002	9.43194	-5.11904	9.89238	-1.00434	-5.48909	-2.62757	-17.2858
946	-2.4423	27.6233	-6.04639	-9.79851	-6.96282	-3.79483	4.27216	6.08911	7.38551	12.0277	-5.43147	-5.67188	-0.835955	-0.102818	10.253	5.59588	-10.5967	-9.1965	5.5184	-10.6896	-3.95228	0.1356	2.44578	-8.14249	-7.34528	5.12501	9.49651	-5.46078	9.74437	-0.620385	-5.71708	-2.40207	-17.1155
948	-3.11782	26.5931	-5.27749	-10.0161	-5.84374	-4.58459	4.65165	6.181	7.77145	12.2552	-6.08762	-4.5528	-0.815094	-0.755489	10.4537	5.93712	-10.4412	-9.31323	5.72999	-10.6484	-3.78639	0.47038	2.31862	-7.46499	-8.01186	5.23031	9.59933	-5.55168	9.96242	-0.746052	-5.03908	-2.33551	-17.0449
950	-3.63737	26.1972	-5.06788	-10.1601	-7.07706	-4.44849	4.84486	6.11742	8.1708	12.5219	-6.08861	-3.60409	0.0745057	0.651181	11.1883	6.17305	-10.6086	-9.54221	5.67039	-10.7462	-3.93291	-0.3015	1.91232	-8.1713	-7.5082	6.85503	9.56009	-5.30134	10.0195	-0.159442	-4.35213	-2.55456	-17.188
952	-3.69499	26.4694	-6.20484	-10.6032	-9.6788	-4.87218	4.07398	5.65847	7.86881	12.1703	-5.45184	-3.32991	1.4027	1.70122	10.9673	5.95252	-11.4938	-10.1914	4.95414	-11.4441	-4.78476	-2.09014	1.23531	-9.84023	-8.11766	6.80288	9.17465	-5.26657	9.50148	1.36644	-3.27428	-2.76566	-17.336
954	-3.39498	26.6502	-7.53999	-10.8793	-9.07183	-4.69734	4.09335	6.00417	8.23438	12.3858	-5.1856	-4.52548	2.20835	0.60598	10.8207	6.17206	-11.532	-10.3628	5.02417	-11.5017	-4.7798	-2.04841	1.80701	-9.45479	-8.88358	5.28594	9.08871	-5.79009	9.83377	1.03861	-4.54088	-2.88288	-17.3365
956	-2.87294	26.9507	-8.12958	-10.8967	-6.25352	-3.89566	5.31624	7.14511	9.47863	13.5596	-4.9303	-5.44637	1.88251	-0.452995	11.4739	7.17789	-10.707	-9.98378	6.02752	-10.8346	-3.76155	0.0248351	3.06964	-8.24978	-8.3973	5.02914	9.66539	-5.88795	11.0199	0.116726	-6.49194	-3.15607	-18.0354
958	-2.81731	26.9085	-7.45555	-10.785	-5.18858	-4.01735	6.23961	7.74165	10.3682	14.6046	-4.66307	-5.52038	1.19458	0.0367561	11.8772	8.02676	-10.4338	-9.96292	6.58333	-10.624	-3.29167	1.60038	3.28571	-8.09977	-7.48485	5.68678	10.2088	-5.56757	11.7605	-0.839929	-6.74526	-3.41485	-18.997
960	-3.65675	26.1669	-6.66231	-11.3924	-6.78698	-5.11308	5.82685	7.17094	10.3737	14.8858	-5.13097	-6.2267	1.44492	0.486275	11.4704	7.94133	-11.2981	-10.783	5.94358	-11.4232	-4.14004	1.09325	2.17557	-9.10362	-7.61698	5.26061	9.96739	-5.77072	11.688	-1.87457	-6.97374	-3.36617	-19.1296
962	-4.72963	25.8401	-6.61016	-12.9998	-8.51502	-6.75966	5.02268	6.1656	10.2818	15.0934	-5.86261	-6.37919	1.73946	0.367562	11.1421	7.62095	-12.5612	-11.8971	4.87715	-12.6203	-5.37038	-0.0844398	0.63628	-10.0583	-9.64503	4.61191	9.34352	-6.44773	11.758	-1.64459	-6.0762	-2.95838	-18.4849
964	-4.75893	26.4118	-6.55204	-13.6172	-7.90656	-7.40786	5.27998	6.02404	11.0333	15.7788	-6.29524	-5.35448	0.423193	0.210603	11.8524	8.1862	-12.9109	-12.062	4.6134	-12.9153	-5.71658	0.200172	0.224014	-9.5889	-11.2817	5.65151	9.44535	-6.53664	12.5572	-1.93318	-4.11371	-2.73089	-18.3895
966	-3.53058	27.0138	-7.06414	-12.7047	-7.32889	-6.2714	5.37137	6.28978	11.684	16.054	-5.97735	-5.68132	-1.26362	0.0874201	12.67	8.89848	-12.8329	-11.6492	4.48525	-12.7489	-5.89043	0.294546	0.589589	-9.68575	-10.324	7.00305	9.74486	-5.69224	13.0246	-1.34955	-4.46041	-3.11037	-19.7575
968	-3.2867	26.0293	-7.99348	-12.6277	-7.64678	-5.79407	4.24286	5.87652	11.2603	15.6795	-5.43147	-6.79245	-1.43896	-0.108282	12.4608	8.86172	-13.3798	-11.8668	3.61105	-13.1736	-6.71645	-1.23878	0.367562	-10.6687	-9.63261	6.79046	9.55959	-5.83132	12.5304	1.03215	-6.25402	-3.34034	-20.4384
970	-4.94123	23.7281	-7.88867	-13.7269	-7.76649	-6.24657	3.2718	5.51393	10.5515	15.1495	-5.88198	-6.60022	-0.379483	-0.712772	11.8226	8.88308	-13.9793	-12.3287	2.79744	-13.5953	-7.36763	-2.49843	0.284612	-10.3484	-10.8267	5.74986	9.67234	-7.50174	11.7143	1.05451	-7.36962	-2.95192	-18.7159
972	-6.10699	22.9875	-7.7635	-14.2972	-9.03954	-6.28581	2.72095	5.43445	10.1224	14.4467	-5.98083	-6.35634	0.855823	-1.22736	11.1729	9.0306	-14.404	-12.5607	2.20388	-13.872	-7.80622	-3.20027	0.482301	-10.0891	-11.5593	4.59204	9.87401	-8.22494	10.8858	0.312428	-8.08438	-2.83271	-17.408
974	-5.70665	24.4533	-8.36998	-14.1799	-9.30826	-6.76314	2.51581	5.25961	10.0568	14.2694	-5.67387	-6.4527	1.50104	-1.02421	10.8153	9.12845	-14.5922	-12.6809	1.79658	-14.1104	-8.16137	-3.27031	0.185271	-10.171	-11.3433	3.52015	9.92914	-7.57376	10.5465	0.0178813	-7.65473	-3.15011	-18.1273
976	-5.27054	26.2161	-9.04054	-14.2192	-7.51565	-7.72774	2.98421	5.09322	10.0429	14.7993	-6.64989	-6.07719	0.759462	-0.281632	10.9419	9.42201	-14.5848	-12.8706	1.71711	-14.2331	-8.21054	-1.95603	-0.323355	-9.94503	-11.153	3.44465	10.0657	-7.44512	10.7581	-1.88698	-6.07967	-2.94993	-19.0179
978	-5.55664	27.0873	-10.0479	-14.4616	-6.73533	-8.86818	3.1814	4.69238	9.59088	15.0755	-7.1466	-5.83827	-0.833969	0.56078	10.8093	9.57549	-15.0318	-13.4389	1.39276	-14.7492	-8.54532	-0.953674	-0.934799	-10.8495	-11.7317	3.97215	10.0439	-7.98603	10.7979	-2.32309	-4.48426	-2.31763	-19.1768
980	-5.80698	26.8057	-11.1913	-15.1088	-8.15739	-10.4124	2.35041	4.13805	9.03358	14.8783	-6.44823	-6.21925	-1.61578	0.351171	10.1541	9.5576	-15.9174	-14.3389	0.661115	-15.7168	-9.36786	-2.02904	-1.59144	-12.361	-13.4607	3.86586	9.97633	-8.29349	10.5013	-1.03613	-3.10044	-2.28137	-19.1157
982	-5.6078	25.4229	-10.8088	-15.9969	-10.625	-10.0548	1.17421	4.13507	8.7748	14.623	-5.81642	-7.56731	-1.21544	-0.634293	9.74933	9.59436	-16.2845	-14.7382	0.234941	-16.1186	-9.79205	-4.01934	-1.28696	-12.4499	-13.9405	4.07646	9.86407	-8.09431	10.1566	-1.77622	-4.3864	-2.8799	-19.0824
984	-5.73148	23.5771	-9.03159	-16.7037	-12.2368	-8.2468	0.565748	4.47681	8.40823	14.5331	-5.46177	-8.64069	-0.669062	-0.996391	9.85513	9.57598	-16.0525	-14.4745	0.316401	-15.7903	-9.56605	-4.92533	-0.439088	-11.4068	-12.9705	4.87765	9.72748	-7.88967	9.8606	-3.50972	-6.98517	-3.09745	-18.688
986	-6.34193	22.3354	-8.45889	-16.8259	-12.3342	-7.94033	0.269711	4.46687	7.64728	14.4497	-5.70416	-8.45989	-1.27802	-1.70271	9.7394	9.43542	-16.0749	-14.3881	0.287592	-15.7644	-9.42201	-4.79321	-0.462433	-11.5251	-12.508	4.54684	9.73791	-7.87775	9.50297	-2.74678	-7.20471	-2.69016	-18.1973
988	-6.30617	22.2738	-9.25859	-16.3049	-11.2727	-9.17365	-0.158946	3.86884	6.82374	14.0791	-6.55651	-7.23948	-2.03103	-2.42045	8.94517	8.99186	-16.3883	-14.474	-0.139574	-16.0674	-9.64155	-4.58062	-1.42256	-12.6238	-12.8835	3.33041	9.32912	-7.63635	8.91735	-1.056	-5.6679	-2.38866	-18.5698
990	-5.49555	22.9021	-9.79205	-15.6095	-10.2873	-9.49452	-0.212093	3.35574	6.43829	14.0294	-6.9355	-5.90036	-1.65155	-1.5383	8.17577	8.51552	-16.3257	-14.3195	-0.328819	-15.9706	-9.67681	-4.36405	-2.01762	-13.1384	-12.9685	2.43932	8.66155	-7.3269	8.71966	-0.431637	-4.80314	-2.55654	-19.7068
992	-4.59751	23.451	-9.55115	-14.5003	-11.0755	-7.83851	0.313421	3.77744	6.83914	14.8912	-6.61314	-6.65386	-1.36991	-0.460446	8.21153	8.78125	-15.7759	-13.8367	0.149012	-15.3725	-9.22034	-4.23988	-1.25716	-12.8259	-11.4858	2.49495	8.88109	-7.2365	9.498	-0.460446	-5.61823	-2.93652	-20.6644
994	-4.48525	23.288	-9.22183	-14.549	-13.5064	-8.25375	0.21706	3.8892	7.05123	15.2573	-6.43929	-7.61201	-1.29392	-0.25332	8.08636	8.98838	-16.0247	-14.0339	0.173847	-15.6194	-9.32713	-4.97848	-1.04407	-12.7291	-11.7034	2.82029	9.48807	-7.90854	10.0051	-1.35899	-5.75533	-2.91467	-20.7355
996	-5.00878	23.3183	-8.98242	-15.4446	-14.0756	-9.85563	-0.255306	3.25441	6.38515	14.3702	-6.25451	-7.24594	-0.85036	-0.471373	7.51217	8.24084	-16.4916	-14.5008	-0.193715	-16.1722	-9.6793	-5.3967	-1.71065	-12.8915	-12.9178	2.64496	9.42498	-8.76635	9.46224	-1.44492	-6.2421	-2.57989	-20.0391
998	-4.5836	24.8765	-8.28256	-15.2086	-11.0865	-8.6536	0.180304	3.22809	5.93414	13.4841	-5.83281	-6.58035	-0.944237	-0.51409	7.56631	7.39396	-15.7058	-13.95	0.25034	-15.4699	-9.04103	-4.28458	-1.28994	-11.8246	-12.0655	3.0602	9.046	-7.96864	8.93325	-0.34968	-7.67211	-2.65688	-19.3824
1000	-3.64433	26.6155	-7.5678	-15.0492	-7.88172	-7.30505	0.684956	3.39498	5.74042	12.6297	-5.89788	-5.36939	-1.85122	-0.261267	7.83851	6.92656	-14.8341	-13.3793	0.759463	-14.6359	-8.37545	-3.41684	-0.68595	-10.4532	-11.8082	3.58274	8.81006	-6.35833	8.40724	-0.415742	-7.40041	-2.88934	-18.8455

## Sheet: 24
	FP1	FP2	F3	F4	C3	C4	P3	P4	O1	O2	F7	F8	T3	T4	T5	T6	CZ	FZ	PZ	FCZ	CPZ	CP3	CP4	FC3	FC4	TP7	TP8	FPZ	OZ	FT7	FT8	A1	BP1
-200	2.64446	5.44935	2.6981	3.1054	2.36233	3.02593	1.73797	2.36283	0.656148	0.000496705	1.91679	2.76317	1.31478	0.67999	2.46565	-1.73847	3.17295	3.3771	2.03848	3.50177	2.67575	2.23269	3.71685	3.16302	2.70108	2.01662	-0.530481	3.29316	0.378489	1.98632	2.70108	-0.376503	-3.01003
-198	1.84178	4.21256	2.11348	2.7885	2.00371	2.50141	1.28845	2.3827	0.413756	0.392894	0.397861	2.24163	0.0367561	0.430147	2.30124	-1.43548	2.64297	2.75969	1.86265	2.89977	2.29379	1.85023	3.33637	2.37077	2.88288	0.713766	0.0188748	2.85755	0.379483	1.18464	2.22077	-0.652671	-1.90288
-196	0.158946	1.03364	0.787278	1.76579	1.1613	1.48912	0.485778	1.80006	0.0178814	0.17335	-0.525514	1.06891	-1.22984	0.21259	1.7936	-0.683467	1.70817	1.68929	1.27157	1.93417	1.40816	1.07437	1.45386	1.1906	2.04096	-0.442564	0.373026	1.68035	0.0630816	0.180304	1.30186	-0.406305	0.0904004
-194	-0.752012	-1.76082	-0.586112	0.574688	0.261267	0.349681	-0.097851	0.516574	-0.578165	-0.513593	-0.678996	-0.219047	-0.864764	-0.489255	0.446041	0.199676	0.717739	0.540912	0.442068	0.860294	0.445048	0.364582	-0.397861	-0.309447	0.836452	-0.0144045	0.548363	0.231961	-0.565747	-0.29554	0.787775	0.2111	1.64956
-192	0.100334	-1.88599	-0.887116	0.00645717	-0.200669	-0.200172	-0.0352661	-0.691414	-0.889599	-0.668069	-0.689924	-0.642737	0.677506	-0.821551	-0.576178	0.865758	0.289083	0.0447035	0.00596046	0.323355	0.0094374	0.0412265	-1.2512	-0.969072	0.150005	1.12951	1.11312	-0.520051	-0.825524	-0.34074	0.77486	0.178814	1.54177
-190	0.536442	-1.43399	-0.904997	0.188251	-0.536442	0.142554	-0.0928839	-1.40568	-1.01626	-0.704328	-0.153979	-0.608961	1.15832	0.42965	-0.948707	0.758966	0.158449	-0.0754992	-0.227491	0.218054	-0.162919	-0.244876	-1.43349	-1.03116	0.322858	0.787775	0.799696	-1.03762	-0.86079	0.0173847	0.243386	-0.0566244	1.27852
-188	-0.514587	-1.88599	-0.593563	0.344714	-0.141561	1.01278	-0.0794729	-0.705818	-0.727177	-0.332296	0.421703	-0.683963	0.6482	1.62621	-0.992417	-0.161429	0.495712	0.0963608	0.094374	0.535448	0.22004	0.0243386	0.221531	-0.229975	0.725686	-0.438094	-0.926356	-1.40766	-0.500679	-0.12815	-0.738104	0.142058	2.31316
-186	-1.48962	-2.01662	0.657638	0.51856	1.13199	2.18749	0.807643	1.20203	-0.00347694	0.891586	0.0998378	-0.910958	0.921388	0.717739	-0.548859	-0.356634	1.45733	0.763933	1.17819	1.33564	1.3113	1.11312	2.65737	1.42356	1.25418	-0.291069	-1.82341	-1.4772	0.448525	-0.244876	-1.30584	0.264247	3.16501
-184	-1.26263	-1.0257	1.01427	0.55035	1.63416	2.05735	1.12007	1.27554	0.305474	1.5825	-0.00993411	-0.51707	1.06146	-0.196695	-0.147025	0.837445	1.62274	1.01676	1.34756	1.46627	1.48813	1.42902	1.92076	1.90735	1.0108	0.361105	-0.253816	-0.891089	0.914931	-0.196695	-0.571211	0.110765	1.80304
-182	-0.179807	0.591576	0.0501672	0.0675519	0.755986	-0.105302	-0.12815	-0.887116	-0.0531475	0.946224	-0.0129143	0.672042	-0.694394	0.481804	-0.190238	1.44889	0.492732	0.419716	0.0750025	0.471373	0.205139	0.358125	-1.72059	0.884136	-0.440081	-0.117222	1.78367	0.338753	0.322858	-1.12206	0.581642	-0.055631	-0.966092
-180	1.00931	1.45982	-0.422696	-0.250836	-0.452995	-2.18948	-1.03017	-2.09063	-0.530481	-0.129143	-0.305971	1.13597	-2.67078	0.990927	-0.327329	0.532965	-0.515083	-0.0486771	-0.915925	-0.398358	-0.828008	-0.633299	-3.74615	-0.543892	-1.33415	-1.12206	1.46776	1.05302	-0.490248	-1.26014	0.29554	-0.0665585	-2.66184
-178	1.659	1.29342	0.0730157	-0.275175	-0.457962	-1.67588	-0.0149012	-0.899533	-0.334283	-0.332793	-0.0730157	0.339746	-2.43684	0.94672	-0.130137	0.0521541	-0.165403	0.2111	-0.34223	-0.144541	-0.240405	-0.080963	-1.57853	-1.07785	-0.855823	-0.89705	-0.426173	0.788768	-0.309944	0.853837	-0.861784	0.172853	-2.23766
-176	1.43647	0.737607	0.868241	-0.181794	0.85185	0.711282	1.7946	1.09226	0.616411	0.593563	0.210603	-0.395377	-0.377993	1.10219	0.55482	1.0704	1.01874	0.624855	1.12951	0.617902	1.17173	1.47174	2.2769	-0.185768	-0.129143	0.827014	-0.97851	0.193218	0.797709	2.82427	-1.06941	0.194709	-0.752509
-174	0.693897	0.0680486	1.23779	0.138581	1.8249	1.85619	2.262	1.8085	1.29441	1.38879	0.428657	-0.161429	1.18067	0.871718	0.913441	1.98334	1.57853	0.711779	1.86165	1.01378	1.72655	2.1254	3.53009	1.30683	0.530481	2.03351	-0.288089	-0.100831	1.50502	2.00321	-0.072519	-0.147521	0.106792
-172	0.0983477	-0.202656	1.1156	0.30448	1.36346	0.890593	1.07735	1.42703	1.21097	1.46031	1.2209	0.197192	1.04805	0.477334	0.63777	1.4474	1.13895	0.634789	1.35303	0.842412	1.12603	1.27703	1.76281	2.07673	1.24524	1.65502	0.0352661	0.0735124	1.34011	0.0307957	0.69042	-0.30448	-0.375013
-170	-0.471373	-0.22004	0.922879	0.0928839	0.357131	-0.564257	0.0372529	1.75436	1.03613	1.32869	1.21593	0.110765	0.201662	0.591576	0.813107	0.223517	0.439584	0.403325	0.759959	0.296533	0.43114	0.12815	0.373522	2.05934	0.733634	0.656645	0.556807	0.117222	1.09623	-1.10418	0.581145	-0.105302	-1.02222
-168	-0.778834	-0.522037	0.412762	-0.202159	-0.283619	-0.98	0.170867	2.67376	1.17769	1.25021	0.317395	-0.0953674	0.17037	0.0715256	1.10616	-0.0908971	0.0481804	-0.0630816	0.777841	-0.287096	0.22004	-0.274181	0.583629	0.979503	-0.542402	0.145535	0.958641	-0.752509	1.17322	-0.885626	0.00596046	-0.110269	-0.903507
-166	-0.356634	-0.602007	-0.292063	-0.0506639	-0.211596	-0.0367562	1.06394	2.6539	1.46528	1.25815	-0.0188748	0.0139078	1.32422	-1.38134	0.895063	1.20203	0.0486771	-0.392397	1.0098	-0.435611	0.326335	0.207623	0.481308	-0.80814	-0.579158	0.513593	1.29143	-1.21444	1.3714	0.683467	-0.325342	-0.175337	-0.372032
-164	-0.370542	-0.785291	-1.22339	-0.325839	-0.232955	-0.103811	1.18415	0.700355	1.17322	0.702341	-0.657141	-0.409782	2.17507	-1.69277	0.342727	2.23269	-0.437597	-0.968079	0.404318	-0.821054	-0.161429	0.370542	-1.42356	-2.03947	-0.59555	0.656645	2.38468	-0.327826	0.991921	0.576178	0.0784794	0.182291	0.116229
-162	-1.21345	-1.36892	-2.44031	-1.60386	-1.2368	-1.65403	0.143051	-1.37488	0.338753	-0.185768	-1.39376	-1.88748	1.28051	-1.17918	-0.266234	1.28051	-1.59194	-2.00321	-0.827014	-1.90139	-1.22239	-0.549356	-2.86698	-3.26981	-1.79907	-0.438591	2.1711	-0.210106	0.156462	-0.905991	-0.21855	0.326832	0.0293056
-160	-1.72158	-1.18315	-2.41647	-2.14974	-1.47671	-1.67042	-0.195205	-1.31528	0.0854333	-0.00645717	-1.01179	-2.43882	-0.689427	-2.16315	-0.222027	0.329812	-1.71115	-2.10305	-0.940263	-2.08865	-1.24772	-0.873705	-1.61827	-3.38753	-2.0206	-1.48763	-0.501672	-1.05053	0.0591079	-0.871718	-1.99924	-0.0834465	-0.615418
-158	-1.69476	-0.473857	-1.24425	-1.81446	-0.570714	-1.02619	0.0203649	-0.804166	0.252823	0.617902	-0.81112	-1.432	-1.89096	-3.20971	0.318388	0.378489	-1.07586	-1.42455	-0.521044	-1.4325	-0.693897	-0.37998	-0.269214	-1.54922	-1.50055	-1.16875	-2.8039	-1.23928	0.432134	-0.809133	-3.08355	-0.463923	-0.94523
-156	-1.06245	0.0819564	0.104308	-0.799696	0.434121	-0.382463	0.0710289	-0.254313	0.804663	1.00633	-0.428657	0.188251	-0.970066	-2.19941	0.892083	0.42667	-0.353158	-0.515083	-0.0740091	-0.591576	-0.0988444	0.143548	0.800192	0.374516	-0.798206	0.561774	-2.78155	-0.769397	0.930826	-0.80963	-2.21531	-0.617902	-0.399848
-154	-0.404318	0.0884136	1.12851	0.791748	1.24474	0.748038	0.5126	0.665088	1.38332	1.21544	0.573695	1.38928	0.705322	0.156959	1.00782	0.446041	0.447035	0.433624	0.634293	0.311931	0.650684	0.72668	1.66694	1.48018	0.714759	2.11547	-1.36942	-0.666579	1.31031	0.0610948	-0.392894	-0.575185	0.646214
-152	-0.321368	-0.34223	1.08729	1.15633	1.18762	1.2666	0.877678	0.908474	0.880659	0.50962	0.331799	1.18862	0.491242	2.6236	0.0283122	-0.0392397	0.532468	0.535945	0.72072	0.479817	0.729163	0.889599	1.12802	1.82589	1.56462	1.38531	-0.0526508	-0.849863	0.72668	0.268718	1.09027	-0.301997	1.10418
-150	-0.0208616	-0.228484	0.614425	0.456472	0.819564	1.40915	0.804663	1.35551	0.278652	-0.273685	-0.282625	0.0620882	-1.05302	3.4074	-0.962118	-0.792742	0.339746	0.224014	0.512103	0.321865	0.502169	0.721713	0.755986	1.60933	1.5229	-0.543892	0.865758	-0.488261	0.0516574	-0.0432134	1.15087	-0.12666	0.605484
-148	0.224511	-0.0834465	0.836452	-0.258287	0.881652	1.22835	0.460446	2.01513	0.499686	-0.138581	-0.579655	-1.11908	-1.83334	1.96944	-0.921885	-0.697374	0.322362	0.113746	0.437101	0.318885	0.381966	0.590583	0.727177	1.52787	0.992417	-1.09971	1.48912	-0.25183	0.157952	-0.361105	0.321368	0.00198682	0.311931
-146	0.372032	0.0516574	1.15534	-0.548363	0.708302	1.09226	-0.0312924	1.64062	0.573198	0.0789762	-0.558793	-1.17024	-1.01576	1.07884	-0.737607	-0.543396	0.110269	0.105302	0.105798	0.21855	0.118713	0.29554	0.270208	1.07884	0.0695387	-0.506639	1.77175	0.00496705	0.254313	-0.582139	0.507136	0.230968	0.599523
-144	1.51247	1.41462	0.842909	-0.0332793	0.0452002	0.59704	-0.445545	0.568728	-0.0452002	-0.103811	0.51111	0.333289	1.33912	1.47323	-1.16775	-0.675023	-0.204146	0.243882	-0.42518	0.0844399	-0.252326	-0.146031	-0.121196	0.0129143	-0.0104308	0.258783	1.94212	1.10318	-0.186265	0.142554	1.24623	0.254313	0.226001
-142	2.34594	2.65737	0.0332793	0.223021	-0.891089	-1.55419	-0.929832	-0.837445	-0.826021	-0.433127	0.974039	1.48416	3.20474	0.730654	-1.86513	-0.279148	-0.787775	0.0889103	-1.25617	-0.389417	-0.975033	-0.885626	-0.609457	-0.917912	0.0546376	0.849863	1.81695	1.77771	-0.825524	0.887613	0.755489	0.211596	-0.807146
-140	1.4027	1.75784	-1.13199	-0.216564	-1.90934	-3.55343	-1.76777	-2.62857	-1.24623	-0.905494	0.221034	1.04556	2.95738	-1.07139	-2.10851	-0.525018	-1.7489	-0.69042	-2.36531	-1.27554	-2.05636	-1.98086	-1.74294	-2.18153	-0.909468	0.579655	0.607471	1.37538	-1.31677	0.966589	-0.644724	0.443558	-0.872215
-138	0.63628	0.365078	-1.39823	-0.261764	-2.4125	-2.63701	-2.75274	-3.82612	-1.18961	-1.4782	0.0953674	0.389914	1.67886	-2.34942	-1.30981	-1.73499	-2.18401	-0.933806	-3.07361	-1.55518	-2.61217	-2.76268	-2.64645	-2.74926	-1.61777	-0.277658	-1.5378	1.49608	-1.57257	1.08878	-1.26908	0.479817	-0.419219
-136	0.661115	-0.142554	-0.573198	-0.0953674	-2.43783	-0.185768	-3.33438	-3.85245	-1.06841	-1.80801	1.08977	0.261764	0.50962	-3.11633	-0.357131	-2.66135	-1.88003	-0.47187	-3.0448	-1.16924	-2.44776	-2.93752	-2.34594	-1.97937	-1.59393	-1.16924	-3.32296	1.23978	-1.63962	0.954171	-0.802676	0.200669	-0.34372
-134	0.139077	-0.482301	0.173847	-0.1659	-2.11746	0.761449	-2.82029	-3.14961	-1.06742	-1.67042	1.72108	0.00198682	-0.447532	-2.97676	0.0139078	-2.7587	-1.37538	-0.156959	-2.50638	-0.742078	-1.96298	-2.53469	-1.72704	-1.15087	-1.19309	-1.63664	-3.69449	-0.392397	-1.47919	0.483294	0.0144045	0.0347694	0.268221
-132	-0.351171	-0.336766	0.849366	-0.0794729	-1.04855	0.177324	-1.67191	-2.3663	-0.77337	-1.15484	1.22587	-0.112752	-0.706812	-0.891089	0.536938	-1.97937	-0.728667	0.200172	-1.74095	-0.211596	-1.25517	-1.55717	-1.74393	-0.077486	-0.388424	-1.05898	-2.70059	-0.750025	-1.01378	0.183284	0.662605	-0.112752	1.09921
-130	-0.454982	0.0288089	1.33564	-0.0933806	0.0745058	-0.340243	-1.10219	-1.93318	-0.315905	-0.727673	0.174344	0.383457	0.0928839	1.39574	0.7237	-0.987947	-0.249843	0.472367	-1.09822	0.125666	-0.636776	-0.701845	-1.17968	0.957648	-0.0571211	0.189741	-1.53879	0.51409	-0.546376	-0.564257	0.522534	-0.374019	1.2358
-128	-0.785291	-0.376503	0.799696	-0.423193	0.033776	-0.970066	-0.970562	-2.12093	-0.73264	-1.10169	-0.614425	0.514587	0.811617	1.37538	-0.218054	-0.582635	-0.486771	0.0139078	-0.98447	-0.272691	-0.655154	-0.606477	-0.375013	0.791252	-0.796715	0.772377	-0.995398	0.879665	-0.898043	-1.87308	-0.47634	-0.358125	1.08878
-126	-1.01825	-1.19855	-0.502169	-0.769893	-0.814597	-2.42442	-0.77039	-2.62459	-1.9898	-2.20189	-0.924865	-0.558297	0.476837	-0.175337	-1.21792	-0.94672	-1.27802	-0.944237	-1.44144	-1.21892	-1.3262	-0.97851	-1.13199	-0.1659	-1.99229	-0.0794729	-0.458956	-0.325342	-1.9908	-2.25604	-1.73152	-0.0551343	0.77486
-124	-0.853837	-1.59045	-1.25219	-0.680983	-1.19656	-3.02891	-0.464916	-2.3375	-2.23021	-2.34048	-1.00682	-1.70519	-0.431637	-0.973543	-0.925859	-0.839432	-1.60486	-1.44243	-1.47919	-1.67092	-1.55667	-0.944734	-2.00123	-1.13994	-2.28882	-1.04358	0.34074	-1.63168	-2.1552	-0.76443	-1.94311	0.121196	0.2111
-122	-1.04457	-1.82738	-1.11808	-0.119209	-0.591576	-1.48316	-0.0442068	-0.863274	-0.967085	-0.929336	-0.749032	-2.00669	-1.43647	-1.12901	0.250836	0.180801	-0.788768	-0.936786	-0.531971	-0.927846	-0.626842	-0.312428	-0.941753	-1.06096	-0.801186	-0.906984	0.926852	-2.0812	-0.922879	0.708799	-1.30435	0.0913938	0.244876
-120	-1.62919	-2.12938	-0.778834	-0.0139078	-0.0178814	0.0283122	-0.210106	0.590086	-0.2111	0.0521541	-0.701845	-2.08666	-2.93752	-1.02917	0.426173	0.533462	-0.0461936	-0.375509	0.228484	-0.162423	0.180304	-0.130137	0.169377	-0.352164	1.08033	-1.33564	1.14391	-2.26845	-0.132124	0.314911	-1.22488	0.182291	0.487765
-118	-0.835458	-1.02222	-0.269214	-0.523031	-0.101825	0.00645717	-0.834465	0.710289	-0.630319	-0.387927	-0.322362	-1.48763	-3.9195	-0.259777	-0.585616	0.285606	-0.189245	-0.273685	0.147025	-0.180304	0.0536442	-0.469883	-0.312428	-0.304977	1.35054	-2.29776	0.814597	-1.56363	-0.534455	-0.00149012	-0.751019	0.191232	-0.458459
-116	1.50055	1.62472	0.81261	-0.655651	0.34223	-0.322362	-0.522037	-0.108778	-0.632803	-0.623862	0.89854	-0.0382463	-2.76317	-0.461439	-1.00831	0.453492	-0.0918905	0.112255	0.238915	-0.0546376	0.12964	0.0561277	-0.89705	0.159939	0.576675	-1.44094	0.161429	0.877182	-0.682473	0.782311	0.402828	-0.146031	-1.89791
-114	3.12179	3.77198	1.76132	0.0849366	1.7345	-0.283619	0.917912	-0.185271	0.00645717	0.231961	1.59393	1.23382	-0.42965	-1.03364	-0.300507	0.670056	0.657141	0.761946	1.07835	0.576675	0.947714	1.50502	-0.579158	1.72754	0.191232	0.791252	-0.0615915	3.11881	0.0456969	0.728667	1.3123	-0.239909	-2.36432
-112	2.65588	4.01338	2.03649	1.10567	2.65936	0.154475	2.17855	0.98596	0.0735124	0.611941	1.1454	2.12739	1.77224	0.524521	0.237425	0.737607	1.31478	1.27355	1.96298	1.15037	1.8095	2.40207	0.674526	3.24448	0.12666	2.57889	0.358125	3.3473	0.344714	-0.0293056	2.35389	0.180304	-1.39376
-110	1.40866	2.52376	1.53929	1.67241	2.25455	0.93629	2.14825	1.98931	-0.488261	-0.374019	0.660121	1.56264	3.24895	1.77224	0.00844399	0.486771	1.44343	1.28051	2.18799	1.28647	2.08815	2.05288	2.25355	2.78105	0.707805	2.89033	0.756979	2.17408	-0.359615	0.371039	2.25256	0.382463	-0.0278155
-108	1.54426	1.28349	0.619392	2.07871	1.50253	2.01563	1.49459	2.30124	-0.544886	-1.00583	1.18812	0.390907	3.2256	0.665089	-0.055631	-0.127653	1.44094	1.00384	2.06977	1.31677	2.01613	1.51793	3.07908	1.08133	2.04643	1.95801	0.448525	1.65651	-0.746548	1.36495	0.505646	-0.038743	-0.13113
-106	1.76728	0.64224	0.021855	1.69277	1.12106	2.53717	1.1464	2.16315	-0.186761	-0.587106	1.57009	0.683963	2.09361	-0.402828	0.047187	-0.692407	1.28398	0.654161	1.8393	1.10318	1.70718	1.41511	2.64843	0.383457	1.88698	1.12951	-0.107785	1.65353	-0.441571	1.2815	0.0129143	-0.264744	-0.616411
-104	0.484784	-0.527998	-0.592073	0.334283	0.409285	2.19891	0.599523	1.24673	-0.308454	-0.622372	1.11063	1.04358	0.881155	-0.702341	-0.298023	-0.692904	0.614425	0.038743	1.09722	0.406305	0.994901	0.864764	1.81347	0.128647	0.442068	0.355641	0.235935	0.64522	-0.393391	0.593066	0.847876	0.104805	0.228981
-102	-0.876188	-1.57207	-1.43051	-0.906487	-0.81261	1.24723	-0.571708	-0.264247	-0.704825	-1.28299	0.38296	0.523527	-0.503163	-0.846883	-1.01477	0.08593	-0.380973	-0.689924	-0.094374	-0.415246	-0.0730157	-0.532965	0.584126	-0.519057	-0.538925	-1.39922	1.27753	-0.409782	-0.778337	-0.226001	0.493725	0.499686	1.22686
-100	-1.27802	-1.97987	-1.72059	-1.68135	-1.73996	-1.30385	-1.56711	-1.86116	-0.98149	-1.59939	-0.51707	0.123183	-1.85917	-0.0203649	-1.52191	0.699858	-1.38382	-1.3123	-1.27057	-1.21742	-1.33018	-1.78665	-2.02507	-1.38233	-1.55866	-3.0761	1.72208	-0.651181	-1.16626	-0.908474	-0.344217	0.486275	1.44144
-98	-0.818074	-1.81049	-0.726183	-1.11014	-1.26461	-2.95639	-1.23729	-2.24163	-0.620385	-0.980496	-0.914435	0.477334	-2.03302	1.4017	-1.01924	0.296533	-1.30783	-0.858307	-1.37041	-0.987947	-1.55469	-1.49707	-3.43273	-0.959635	-1.3868	-2.5938	0.893573	-0.679493	-0.796219	-0.677506	-0.226498	0.166893	1.63267
-96	-0.656645	-1.52787	0.550846	0.198682	-0.0799696	-1.67787	-0.356634	-1.09722	0.248849	0.104308	-0.736614	1.06792	-1.34359	1.74741	-0.491242	-0.669559	-0.438094	0.072519	-0.599027	-0.0998378	-0.73115	-0.399351	-1.75188	0.182291	-0.584622	-0.663598	-0.914931	-1.29938	0.0988444	0.0501672	0.623365	0.221531	2.08616
-94	-1.50005	-1.45286	0.282625	0.110765	-0.273685	-0.565251	-0.370542	-0.695388	0.0586112	0.17633	-0.47336	0.893573	-1.56959	0.941257	-1.50998	-0.999371	-0.593563	-0.222524	-0.710785	-0.338256	-0.781318	-0.415742	-0.432134	-0.195702	-1.24971	-0.108778	-2.18749	-2.68271	0.0203649	0.320375	1.3113	0.652174	1.96447
-92	-2.17855	-1.24176	-0.615915	-0.623365	-1.08878	-0.115236	-0.635286	-0.930826	-0.742575	-0.402828	-0.441571	0.221531	-2.66532	0.316401	-2.22921	-0.520051	-1.13597	-0.849366	-1.19408	-0.883639	-1.27057	-0.921885	-0.677009	-0.691414	-0.956655	-1.02669	-1.36147	-3.50326	-0.580152	0.0874201	1.27902	0.69042	1.32571
-90	-2.10504	-1.25766	-0.964105	-0.701348	-1.4469	0.666082	-0.796219	0.329812	-0.350177	-0.197192	-0.465413	-0.813603	-2.65688	0.526011	-0.752509	-0.246366	-1.04209	-0.834962	-0.85483	-0.790258	-1.03662	-1.13895	-0.0357628	-0.59406	0.85781	-1.68135	1.02123	-2.83569	-0.192722	-0.150502	0.60449	0.188251	1.04258
-88	-1.75287	-1.86662	-1.58846	-0.831981	-2.22872	0.0854333	-1.55419	1.508	0.298023	0.025332	-0.664095	-2.60373	-1.66645	0.389417	0.708799	-0.351667	-1.37786	-1.03166	-0.714262	-1.12106	-1.18365	-1.89841	0.539919	-1.42256	1.4777	-1.98384	2.45571	-1.51346	0.263254	-0.500679	-1.12901	-0.143548	0.884632
-86	-1.23084	-1.96894	-1.9148	-0.85334	-2.66135	-0.835955	-1.86513	0.642737	0.137091	-0.368555	-1.15434	-3.19233	-0.538429	-0.706315	0.587106	-0.25332	-1.91977	-1.26958	-1.09375	-1.55965	-1.659	-2.31713	-0.0293056	-2.12193	1.43498	-1.55171	1.70618	-0.430644	-0.0342727	-0.971059	-2.39362	0.110765	0.291566
-84	-0.660618	-0.81112	-1.04606	-0.450015	-1.91629	-0.302494	-0.843902	-0.326335	0.144541	-0.0794729	-1.24971	-1.5681	0.860294	-0.950694	0.386437	0.0486771	-1.65304	-1.08431	-0.970066	-1.32521	-1.36743	-1.51893	0.055631	-1.60883	1.2666	-0.525018	-0.254313	0.268718	-0.00198682	-1.09375	-1.88698	0.280639	-0.462433
-82	-0.501176	0.736117	-0.584622	-0.901024	-1.4027	3.17891e-08	0.208616	0.198185	0.655154	1.10616	-1.17272	0.0298023	1.13646	0.209113	1.04407	0.170867	-1.37885	-1.21842	-0.445545	-1.35551	-0.934303	-0.882645	0.853837	-1.43697	-0.890096	-0.409285	-1.77026	0.470877	0.745555	-1.08679	-1.14093	-0.0208616	-1.02719
-80	-1.09673	0.796219	-1.5681	-2.04494	-2.01414	-0.98149	0.0198682	0.815093	0.947217	1.75933	-1.18862	-0.0591079	-0.323355	0.997881	1.46677	-0.00695388	-1.88748	-1.9903	-0.55333	-2.14527	-1.19358	-1.39028	0.809133	-2.18451	-3.80526	-1.36644	-1.84526	-0.29554	1.30435	-1.80056	-1.05898	-0.0581145	-0.926852
-78	-1.00583	0.442564	-1.9744	-1.75635	-2.2307	-1.45386	-0.507633	0.779827	0.944237	1.62671	-0.902017	-0.164409	-0.85334	1.01775	1.19656	-0.0268221	-2.05487	-2.10454	-0.782311	-2.40107	-1.29392	-1.74046	0.435114	-2.26448	-4.12812	-1.56661	-1.11759	-0.51409	1.34408	-2.16415	-0.329812	0.263751	-0.98745
-76	1.08083	2.11944	-0.609954	0.278155	-0.80963	0.274678	-0.0427167	0.852346	1.41114	1.86016	-0.328819	1.05898	0.810126	0.507633	1.19259	0.989437	-0.892083	-0.698368	-0.0521541	-1.13646	-0.362098	-0.662108	0.72221	-0.841419	-1.41859	0.12517	0.443061	1.22587	1.63118	-0.828008	1.14292	0.139574	-2.52922
-74	2.98818	3.58721	0.303984	1.33117	0.327826	1.24673	0.447035	0.558793	2.05487	2.14775	0.251333	1.76231	2.05537	-0.0938773	1.44392	2.12689	-0.0372529	0.337263	0.484784	-0.0705322	0.223517	0.392894	0.139574	0.363588	0.918905	1.70122	2.46267	2.57095	2.03351	0.425676	1.41909	-0.329812	-3.80774
-72	2.08865	1.98682	-0.811617	-0.0516574	-0.094374	-1.67886	0.0551343	-0.521044	1.7633	1.35203	0.709295	1.31577	1.40021	0.756979	1.14888	1.73499	-0.821551	-0.564257	-0.143051	-0.804166	-0.572205	0.172357	-1.90437	0.17335	-0.266234	1.5383	2.84612	1.26958	1.56065	-0.512103	1.36991	-0.222027	-2.18848
-70	-0.632306	-1.10815	-1.74542	-1.89543	-0.709792	-4.42068	-0.328322	-1.28845	0.829498	0.231465	-0.158946	0.260274	0.646214	1.8398	0.449518	0.398358	-1.70022	-1.77821	-0.850856	-1.76579	-1.37488	-0.398854	-3.091	-0.077486	-2.41051	0.798206	1.75238	-1.12355	0.653664	-1.96795	1.281	0.463426	1.06742
-68	-1.65155	-2.49048	-1.30286	-2.31167	-1.03513	-3.20971	-0.435611	-1.38581	0.260274	-0.0933806	-1.5974	-0.870724	0.751515	0.555813	0.194709	-0.603994	-1.59244	-1.90735	-1.01129	-1.66794	-1.36942	-0.744561	-2.38617	-0.846386	-2.07076	0.364085	0.477831	-1.76877	0.228484	-0.959635	-0.293056	0.439584	2.02407
-66	-0.47187	-2.05785	-0.780324	-1.40915	-1.12007	-0.56078	-0.542402	-1.08133	0.198185	0.154972	-1.3863	-1.04358	0.673036	-2.33948	0.471373	-1.18365	-1.00434	-1.39227	-0.800192	-1.07189	-0.894566	-0.85483	-0.437597	-1.99179	-0.566244	0.328322	-0.782808	-0.961125	0.238915	0.775854	-2.18401	-0.25183	0.660121
-64	0.278652	-1.47372	-0.325839	-0.462929	-0.522037	0.373522	-0.55482	-0.891586	0.0670552	-0.0799696	-0.367562	-0.742078	0.0362595	-4.07447	0.571708	-1.21742	-0.433624	-0.716746	-0.595053	-0.521044	-0.435114	-0.491738	0.845889	-1.41064	0.0799696	0.279148	-1.66694	-0.47038	0.0506639	0.858804	-3.17295	-0.447035	-0.262757
-62	-0.319382	-1.13497	-0.610451	-0.955661	-0.331799	-0.731647	-0.838439	-1.84973	-0.42816	-0.94374	-0.0089407	-1.22885	-1.01974	-3.71784	0.265737	-0.736614	-0.668565	-0.744561	-1.01775	-0.722706	-0.789762	-0.484288	-0.619888	-0.68148	-0.975529	-0.383457	-2.87145	-0.649194	-0.485778	0.376999	-3.15557	-0.452995	-0.478327
-60	-0.674526	-0.567238	-1.69029	-2.32607	-0.900527	-1.7484	-1.0555	-2.88735	-0.505646	-1.08133	-0.154972	-1.74691	-2.34346	-3.38753	-0.12219	-0.0486771	-1.20451	-1.28001	-1.46528	-1.29143	-1.35452	-0.923375	-2.71797	-1.17024	-2.51979	-0.776847	-3.88424	-0.701845	-0.560284	0.0382463	-1.98533	-0.726183	-0.683467
-58	0.130634	0.354648	-1.47372	-2.12987	-0.60151	-1.24276	-0.240405	-2.31167	0.038743	-0.305474	-0.0839432	-0.993907	-2.63502	-3.45409	-0.188251	1.07735	-0.637273	-0.828505	-0.971059	-0.768403	-0.81261	-0.403821	-2.80142	-1.11212	-1.5825	0.0645717	-2.46614	-0.326335	-0.00794729	0.0735124	-0.408292	-0.77039	-0.876188
-56	0.351171	0.099341	0.142058	-0.791748	0.408789	-0.278652	0.560284	-1.09424	0.255803	0.143051	-0.307461	-0.438591	-2.13534	-1.93069	-0.368555	1.76281	0.328819	0.0958641	-0.318388	0.182291	0.0789762	0.399351	-1.65552	-0.178317	0.155965	0.599027	-0.116229	-0.877182	0.267724	0.419716	0.0829498	-0.188251	-0.372529
-54	-0.935296	-2.07474	0.743071	-0.650684	0.727673	0.451505	0.0670552	-0.561774	-0.151495	-0.261267	-1.42554	-1.34756	-2.67724	0.0665586	-1.31081	0.974536	0.404318	-0.000993411	-0.465413	0.0839432	0.114739	0.234942	-0.64671	0.155965	-0.64522	-0.43263	0.175337	-2.57095	-0.0764926	-0.289083	-0.780821	0.527998	1.15037
-52	-1.52687	-3.02196	0.0536442	-0.670552	0.452002	0.80814	-0.209113	-0.016888	-0.599523	-0.851353	-1.46876	-1.74493	-2.75175	0.533958	-1.77672	-0.169873	0.270208	-0.301003	-0.569721	-0.124176	0.0248353	0.0869234	-0.00447035	-0.197192	-1.15683	-1.01974	-0.711779	-2.76019	-0.496705	-0.93778	-1.25517	0.491738	1.66992
-50	-0.671546	-0.882149	0.387927	0.758966	0.556807	0.385443	0.759959	0.932316	-0.353654	-0.352164	0.0153979	-0.232458	-0.557303	0.832975	-0.77188	0.0511607	0.879169	0.503163	0.0983477	0.682473	0.649194	0.821551	0.557303	0.377993	0.783304	0.00993411	-0.848373	-0.555317	-0.162919	-0.112752	-0.0521541	0.0342727	0.429153
-48	-0.172357	1.21792	1.75784	1.96397	1.06146	-0.0163913	1.27355	1.34756	0.475347	0.859797	0.558793	1.01477	2.0658	2.18252	0.12219	0.995894	1.6282	1.53631	0.81112	1.60933	1.30832	1.44442	0.98745	1.97043	2.12391	0.956655	0.0307957	1.19309	0.705818	0.406305	1.43548	0.0968575	-0.350674
-46	0.08593	1.74542	2.40157	1.85966	1.28945	0.656148	0.796219	1.64807	0.776847	1.056	0.00794729	1.07388	3.20772	3.22213	0.0754992	0.576178	1.86761	1.80751	1.11957	1.84625	1.54426	1.28547	1.60734	3.03189	1.77373	0.975529	1.08282	1.82738	0.949204	-0.106792	1.92076	0.326832	-0.440578
-44	0.118216	1.38879	1.59194	1.05053	0.905991	1.32173	0.0948707	1.71363	0.250836	0.375013	-0.686944	0.599027	2.66333	2.74579	0.0486771	-1.12007	1.40766	1.10169	0.789762	1.30783	1.2065	0.540912	2.08914	2.38568	1.24276	0.171363	0.64373	2.02109	0.355641	-0.865758	1.45932	0.30448	-0.441571
-42	-0.0879169	0.909468	-0.016888	0.491242	0.12368	1.35154	-0.662605	1.18464	-0.021855	0.189741	-0.546376	-0.13411	1.40369	1.03315	0.327826	-2.18252	0.663102	0.0248353	0.153979	0.485778	0.528991	-0.407298	2.1711	0.634293	1.23829	-0.809133	-1.23829	1.56661	0.00347694	-0.962118	0.610451	0.198682	-0.0864267
-40	0.222027	1.31379	-0.920395	0.636776	-0.494719	1.85569	-0.972052	0.999868	0.323355	0.587602	0.114739	0.338256	1.06047	-0.575185	0.216067	-1.38978	0.389914	-0.329812	0.110269	0.165403	0.317395	-0.804166	2.34842	-0.568231	1.14987	-0.917912	-2.15024	1.37587	0.333289	-0.373026	0.89705	0.134607	0.187258
-38	-0.136097	0.890096	-1.16924	0.332296	-0.856817	2.09759	-0.803173	0.376999	0.12219	0.134607	-0.511607	0.927349	1.29888	-0.716746	-0.500679	-0.260274	0.115236	-0.47038	0.0442068	-0.0968575	0.163416	-0.687937	1.38481	-1.60734	0.395377	-0.918905	-1.33961	0.602007	0.136594	0.13411	1.14689	0.374516	0.43114
-36	-1.29888	-1.05103	-1.60784	-0.763436	-0.985463	1.34309	-0.586609	-0.410279	-0.690917	-0.910461	-0.949204	0.0476837	0.659625	0.20961	-1.22637	-0.400345	-0.364085	-1.03712	-0.293056	-0.677506	-0.210603	-0.548363	-0.118216	-2.57989	-0.710785	-1.13845	-0.799696	-1.12206	-0.646214	0.766913	0.0367562	0.523031	0.820061
-34	-1.78814	-1.97192	-1.43945	-0.991424	-0.373026	0.997881	-0.150005	-0.169377	-0.921388	-0.772874	-0.353158	-0.509123	-0.797212	0.628829	-1.4931	-0.330309	-0.158946	-1.05202	-0.0869234	-0.565747	-0.0288089	-0.189741	0.105302	-1.65701	-1.07984	-0.336766	-0.747542	-1.61529	-0.721713	0.781814	-0.231465	0.16739	1.08083
-32	-1.31329	-1.00136	-0.307461	0.1659	0.389914	1.12504	0.378986	0.118216	-0.583132	-0.0586112	-0.0874201	0.513593	-2.08219	0.249346	-1.16577	0.686944	0.533958	-0.182291	0.400345	0.330806	0.510116	0.2111	0.776847	-0.252823	0.0819564	0.466406	0.453492	-0.537435	-0.226498	-0.270208	0.695884	-0.188748	0.870724
-30	-0.20961	0.380476	0.699858	1.33713	0.400841	0.734131	0.555317	0.33925	-0.319878	0.0844399	0.580152	1.47422	-1.67986	-0.504156	-0.498692	1.06593	1.02073	0.794729	0.784298	1.03464	0.847876	0.349184	1.17968	-0.20812	1.29243	0.244379	1.33564	0.154475	0.0884136	-0.682473	0.903507	-0.277162	0.174344
-28	0.50813	0.680983	0.868738	1.02619	0.0397364	-0.334779	0.271201	0.50962	-0.132124	0.0149012	1.40369	0.886619	0.490248	-0.0963609	0.256797	0.329812	1.02669	1.09424	0.828008	1.02818	0.81708	0.293056	1.6436	-0.0362595	0.406305	-0.0317891	0.219047	-0.51111	0.0968575	-0.248849	0.63628	-0.236432	-0.12666
-26	0.361602	0.0655651	0.482301	-0.105798	0.219047	-0.691911	0.0854333	0.451008	0.352661	0.25928	1.06047	0.164906	2.36283	1.57704	1.24971	-0.148018	0.923872	0.783304	0.795722	0.840425	0.822047	0.3467	1.56114	1.02967	-0.936786	0.3015	-0.269214	-0.910461	0.242392	0.277162	0.582635	-0.156462	0.378489
-24	0.824034	0.498195	0.710785	0.0804663	1.51445	0.506143	1.04457	1.12851	1.14739	1.02917	0.741581	1.03513	3.40342	2.08318	2.10653	0.581642	1.60535	1.18216	1.6133	1.46528	1.67141	1.28994	1.52489	2.61168	-0.262757	1.47124	0.977019	0.662108	0.98596	1.22537	1.12057	-0.313421	0.537435
-22	1.83086	1.6426	1.40617	1.21345	2.63552	1.22637	2.36978	1.62721	1.26908	1.34359	1.79708	2.0802	3.75907	1.66843	1.90536	1.75883	2.31614	2.02109	2.3524	2.21878	2.39611	2.3673	1.05252	2.95788	1.16875	2.65191	2.36332	2.55307	1.37289	2.18848	2.11398	-0.42369	0.0417233
-20	1.36097	1.11361	1.34955	1.25567	1.96397	0.224511	2.02705	0.331799	0.182291	0.194709	2.23865	1.16527	2.50787	1.44442	0.449518	1.98086	1.61131	1.72456	1.52091	1.75585	1.52737	2.00818	-0.787775	1.51992	1.55618	2.04146	3.4829	1.72456	0.338753	1.47621	1.57754	-0.148515	-0.357131
-18	-0.0213583	-0.421703	0.912448	0.169873	0.568728	-1.14689	0.38445	-1.56313	-1.14689	-1.34557	0.781814	-0.418226	0.167886	1.4479	-0.772874	0.733137	0.216067	0.744065	-0.0660618	0.589589	-0.0332793	0.745555	-2.60919	0.25332	0.855327	0.0233452	3.35127	-0.801682	-1.19905	-0.204643	-0.0804663	0.072519	-0.574688
-16	-0.190735	-0.785788	0.881652	-0.281135	0.080963	-1.04308	-0.42369	-1.58946	-1.51793	-1.57356	-0.563761	-0.744065	-1.67042	1.42604	-0.362595	-1.22488	-0.176827	0.491738	-0.488261	0.196199	-0.47187	0.0278155	-2.00371	-0.21408	0.579158	-1.39177	1.26461	-1.64459	-1.60386	-0.457466	-1.131	-0.0412265	-0.620882
-14	0.610451	0.127157	0.813603	0.47634	0.244379	0.699858	-0.097851	0.233452	-1.00086	-0.680486	-0.64671	-0.554323	-2.64347	0.511607	0.470877	-2.63949	0.439088	0.94374	0.316401	0.694891	0.229478	0.0670552	0.659128	-0.0695387	1.72158	-1.91828	-1.3123	-0.235438	-0.90003	-0.26077	-1.51793	-0.219047	-0.614921
-12	1.33018	1.2214	0.839929	1.35501	0.366072	2.07673	0.34074	1.35253	-0.410279	0.147025	0.0938773	-0.397861	-2.41448	-1.11759	0.207126	-2.35836	0.90152	1.42107	0.858804	1.19209	0.801186	0.396371	1.76529	0.301997	3.27329	-1.6138	-2.25604	1.57158	-0.271201	0.00645717	-1.28299	-0.234942	-0.856817
-10	1.26064	1.28001	1.08232	1.69575	0.599027	1.48416	0.567238	0.858804	-0.204146	0.295043	0.436604	0.102818	-0.920892	-1.67191	-0.38594	-0.736117	0.839929	1.49409	0.6785	1.21444	0.673532	0.76443	0.354151	0.572205	3.31104	0.0432134	-1.43697	1.89245	-0.251333	0.978013	-0.420709	-0.0819564	-0.510613
-8	0.238419	0.224014	0.482301	1.16825	0.770887	-0.308951	0.425676	0.225504	-0.200172	0.055631	0.279645	0.561774	0.446538	-0.254313	-0.245372	0.500182	0.327329	0.755986	0.239412	0.526011	0.135104	0.755986	-0.8141	0.51111	0.584622	1.75287	-0.335276	0.915925	-0.412265	1.11262	0.529985	0.12517	0.569721
-6	-0.427663	-0.493228	-0.38743	0.168383	0.51856	-0.946224	0.159939	0.144045	-0.094374	0.00794729	0.637273	0.643233	0.525017	0.34521	0.175337	0.641743	-0.168383	-0.123183	-0.0591079	-0.271201	-0.239909	0.334779	-0.450015	0.1659	-2.35538	1.8537	0.171363	-0.0759959	-0.317891	0.366072	0.549356	0.158946	0.800192
-4	0.153482	0.101825	0.069042	0.178814	0.673532	0.105302	0.47336	0.610451	0.340243	0.34819	0.761449	0.51856	0.067552	-1.38829	0.481308	0.50962	0.17186	0.170867	0.243386	0.021855	0.12368	0.440081	0.60151	0.822047	-1.86066	1.20004	0.317891	-0.223517	0.162919	-0.150998	-0.0273188	-0.117222	-0.0193715
-2	1.09126	1.055	0.832478	0.6785	0.947217	0.689924	0.641247	0.94225	0.960628	0.887613	0.0586112	-0.271698	0	-2.11895	0.872711	0.868241	0.50962	0.69042	0.486275	0.555317	0.388424	0.689924	0.586609	1.45336	0.166396	0.969072	0.864764	0.567238	0.779827	-0.0680486	-0.224014	-0.43114	-0.727177
0	0.896553	0.56078	0.603	0.216564	0.370542	0.507633	0.178814	0.757476	1.20948	1.11163	-0.208616	-1.19656	0.000993411	-0.34074	1.25716	1.14292	-0.0144045	0.0412265	0.0958641	0.0824531	-0.112752	0.308951	-0.17037	0.565251	0.506143	0.605981	0.874698	0.603497	1.01477	0.613928	-0.326335	-0.341733	-0.185271
2	-0.469883	-1.25368	-0.234445	-1.13199	-0.266731	0.00248353	0.125666	0.896056	0.939767	0.84887	0.73115	-1.5676	-0.451505	1.30435	1.34359	0.871221	-0.77188	-1.03017	-0.245869	-0.836452	-0.655154	0.064075	-0.0889102	-0.692904	-0.435611	-0.038743	-0.0884136	-0.507136	0.752509	1.14292	-1.21047	0	1.27057
4	-2.19196	-2.98669	-1.13795	-2.63403	-0.631313	-1.72009	0.237425	0.853837	0.279645	0.0392397	0.376503	-2.24014	-1.15037	1.37836	1.02321	-0.0670552	-1.64757	-1.85718	-0.671546	-1.7946	-1.2363	-0.117222	-0.166893	-1.30137	-2.1254	-0.303984	-1.07338	-1.46131	0.0814597	0.332296	-2.20339	0.150502	2.035
6	-3.2117	-3.0006	-1.36197	-3.13669	-1.00036	-3.46253	-0.169377	-0.0918905	-0.151992	-0.564257	-1.74592	-2.21431	-1.06295	1.25219	0.787775	-1.30087	-2.39859	-2.21332	-1.42753	-2.45869	-1.95503	-0.730654	-1.04805	-0.823041	-3.74814	-0.188251	-1.35601	-1.5686	-0.323355	-1.4027	-1.29094	0.190238	1.10616
8	-2.47508	-0.876188	-0.576675	-1.9605	-0.692904	-2.41746	-0.203152	-0.497699	0.361602	0.216067	-2.43733	-0.653168	0.195205	0.409782	1.10368	-1.35551	-1.95156	-1.63019	-1.42852	-1.93417	-1.73499	-0.800689	-0.626345	0.554323	-2.90275	0.489255	-0.616411	-0.489255	0.329316	-1.60635	0.0874201	0.165403	-1.15385
10	-0.635286	1.17421	0.206629	-0.443061	-0.0402331	0.266234	0.16888	0.190735	1.20103	1.56661	-1.62323	0.85185	1.5234	-1.8989	1.54624	-0.574191	-0.895063	-0.736117	-0.605484	-0.894566	-0.753502	-0.20812	1.1608	1.20848	-0.586609	1.24425	-0.315408	1.0103	1.20302	-0.273685	-0.0114242	-0.0352661	-2.88785
12	0.64075	1.30484	-0.0715256	-0.38892	-0.328819	0.474354	-0.0998378	0.403325	1.33167	2.01315	-0.380973	0.756482	1.41859	-2.714	1.02868	-0.373522	-0.951688	-0.717243	-0.386437	-0.941753	-0.676513	-0.291566	1.18862	0.236432	0.0953674	0.386437	-1.28547	1.25815	1.27057	0.200172	-0.968575	-0.278155	-2.66383
14	0.424683	-0.397364	-0.993411	-1.43399	-0.953178	-1.40816	-0.59257	0.0347694	0.692904	1.31627	0.0625849	-0.954668	0.169377	-1.35154	-0.377993	-0.399848	-1.76231	-1.36048	-0.941753	-1.78069	-1.34408	-0.779331	-0.488758	-0.511607	-0.631809	-1.13746	-2.26299	-0.265241	0.591576	-0.569224	-2.0355	-0.3015	-1.04755
16	-0.205139	-2.15123	-1.80552	-1.97043	-0.766416	-2.13186	-0.356138	0.0958641	0.134607	0.401835	-0.199676	-2.49644	0.0322859	0.387927	-1.05947	-0.5578	-2.0206	-1.84526	-1.09226	-2.24511	-1.52737	-0.582635	-1.41909	-0.416736	-1.56015	-0.773867	-1.89443	-1.87258	-0.0730157	-0.927349	-2.21034	-0.274678	0.338753
18	-0.207623	-2.30968	-1.92672	-1.57207	-0.344217	-1.27604	0.156959	0.643233	0.0844399	0.16739	0.0437101	-2.54959	1.23282	1.49061	-0.542402	-0.950694	-1.64757	-1.86314	-0.669062	-2.04096	-1.11858	-0.030299	-0.474354	-0.447532	-1.64012	0.829498	-0.942747	-1.83682	-0.0889103	-0.551343	-1.80999	-0.528991	0.194709
20	-0.284612	-1.33514	-1.48267	-1.15434	-0.579655	-0.100831	-0.0357628	0.653664	-0.135104	-0.116726	-0.00347694	-1.59889	1.75784	0.689924	-0.375509	-0.774364	-1.31081	-1.57754	-0.576675	-1.64906	-0.771383	-0.0650684	1.35601	-0.801682	-0.872711	1.36097	-1.01278	-0.855327	-0.199676	-0.225504	-1.47671	-0.711282	-0.969072
22	-0.677506	-1.01328	-0.932316	-1.56065	-0.957648	0.504653	-0.55333	-0.156462	-0.241896	-0.30001	-0.497699	-1.15385	1.12951	-1.66396	-0.974039	-0.0541409	-1.31279	-1.31975	-0.801186	-1.57207	-0.846386	-0.376503	1.46876	-1.34806	-0.643233	0.866751	-0.973543	-0.667572	-0.402828	0.134607	-1.1762	-0.514587	-1.2209
24	-0.797709	-1.29392	0.101328	-2.09461	-0.378986	0.526011	-0.219544	-0.089407	0.395377	0.432134	-0.949701	-1.10368	0.069042	-2.47161	-0.810126	0.402828	-1.02073	-0.972549	-0.505149	-1.33415	-0.608464	-0.0273188	0.113249	-0.758469	-0.521044	0.513593	0.744561	-1.11659	0.137091	0.706315	-0.993907	-0.257293	-0.5578
26	-0.232955	-0.828008	0.792245	-1.47174	0.479817	0.352661	0.416736	0.561774	0.842412	0.907481	-0.973046	-0.413756	-1.03662	-0.964105	-0.0581145	0.572205	-0.481804	-0.559787	0.0283122	-0.885626	-0.112752	0.483791	-0.513593	0.42667	0.478327	-0.00596046	2.07772	-0.769893	0.644227	1.04358	-0.281135	-0.279645	-0.613928
28	-0.0198682	-0.617902	-0.0173847	-0.433127	0.568231	0.0745058	0.533462	0.13262	0.619888	0.626842	-0.290573	-0.0576178	-1.66943	0.0849366	0.121196	1.26759	-0.421206	-0.601013	0.0899037	-0.902017	-0.109275	0.612934	-0.206629	0.571708	1.03166	-0.275671	0.976523	-0.485778	0.483791	0.498195	0.705322	-0.571708	-0.785788
30	-0.938773	-1.48614	-1.20203	-0.356138	0.246863	-0.127157	0.383457	-0.98745	0.478327	0.403821	0.365078	-0.890096	-1.15832	-0.160436	0.33627	2.40902	-0.751515	-1.11808	-0.142554	-1.33465	-0.38892	0.669062	-0.402828	-0.150502	0.50962	0.879169	-0.400345	-1.48515	0.201166	-0.234445	0.376503	-0.733137	-0.13262
32	-1.32173	-1.67092	-1.82539	-1.07239	-0.56078	-0.418723	-0.222524	-2.21084	0.341733	0.2111	0.376503	-1.809	0.0129143	-1.06593	0.580649	2.35885	-1.41809	-1.84278	-0.706812	-2.04444	-0.995894	0.0293056	-1.84973	-1.67191	-0.582635	1.76181	-0.0889103	-2.11	-0.077486	-0.0153979	-1.58846	-0.597537	-0.558297
34	-0.182291	-0.535448	-1.50949	-1.6426	-1.34557	-1.29243	-0.869731	-2.36928	-0.0804663	0.0496705	0.373522	-1.09871	0.229478	-1.2368	-0.00248353	0.722706	-1.97838	-2.19047	-1.16179	-2.58088	-1.53532	-0.889103	-2.61118	-2.32607	-2.08815	0.731647	0.873208	-0.85781	-0.341733	0.366569	-2.49445	-0.299017	-2.08418
36	0.757972	-0.0566244	-0.572205	-1.77175	-1.26014	-1.78218	-0.877678	-1.03066	-0.367562	-0.00695388	0.683963	0.247856	-0.283122	-0.439088	-0.631313	-1.04209	-1.8398	-2.03451	-0.959635	-2.37077	-1.29193	-0.997881	-1.47074	-1.22885	-2.69512	-0.25332	0.965595	0.610451	-0.487765	0.0566244	-0.891089	-0.100831	-2.09411
38	0.50813	-0.68893	0.0149012	-1.71115	-0.813107	-1.15732	-0.484288	-0.17484	-0.291566	-0.398358	0.118216	-0.275671	0.191232	-0.767906	-0.179807	-1.60386	-1.42306	-1.83334	-0.666579	-1.89741	-0.805656	-0.541906	-0.210106	-0.0854333	-1.93467	-0.149012	0.159442	0.889103	-0.663102	-0.206133	0.100831	-0.121196	-0.85334
40	0.242889	-0.221531	0.390907	-1.16875	-0.323355	-0.413756	-0.0412265	-0.587602	0.227988	-0.493725	-1.00484	-1.30385	1.65751	-1.29491	1.13199	-0.686944	-1.07487	-1.40766	-0.555317	-1.46081	-0.587106	-0.0461936	-0.331302	0.370046	-0.970066	-0.2563	0.169873	1.17123	-0.455479	-0.169377	-0.280142	-0.25779	-0.294546
42	0.38743	0.981986	0.206133	-0.676016	-0.234445	-0.25779	0.0442068	-1.19259	1.2661	0.270704	-1.10765	-0.721713	2.94	-0.198682	2.52326	-0.00198682	-0.936786	-1.05649	-0.406802	-1.21792	-0.613928	0.0158946	-1.0848	-0.376503	-0.403325	-0.393391	1.42703	1.82937	0.43263	-0.064075	0.504156	-0.416239	-0.386437
44	-0.0447035	0.503659	-0.813107	-1.21941	-0.709295	-0.649194	-0.225008	-1.14342	1.59542	0.784795	-0.448525	0.0442068	2.94944	0.904997	2.70903	-1.20004	-1.13348	-1.39972	-0.364582	-1.4921	-0.802179	-0.283122	-1.06891	-1.75834	-0.149012	-0.228981	1.18415	0.926356	0.954668	-0.125666	1.09176	-0.434617	0.0620881
46	-1.00434	-0.713766	-1.62572	-1.98235	-0.968575	-0.909468	-0.288586	-0.816584	0.494222	0.465413	0.0754992	0.211596	1.48217	1.37885	1.44939	-2.93106	-1.33365	-1.83086	-0.497699	-1.84278	-0.929336	-0.453492	-0.13113	-1.78814	-0.520547	-0.29852	-1.37289	-1.36296	0.396868	-0.785788	0.315408	-0.193715	0.485778
48	-1.5825	-0.373522	-1.31577	-1.64211	-0.51558	-0.38147	0.00248353	-0.458956	-0.17037	0.211596	-0.246366	0.60002	0.138581	2.40554	0.517567	-2.7587	-1.04705	-1.62323	-0.419219	-1.60237	-0.669559	-0.255307	1.22786	-0.59555	-1.20252	0.102321	-3.24845	-2.22971	-0.0536442	-1.09971	0.436107	0.0591079	-0.364582
50	-1.07239	1.15782	-0.484784	-0.664095	0.0908971	0.702341	0.146528	0.0601013	0.535448	0.608464	-0.699361	0.714759	-0.6785	2.14328	0.349184	-0.84887	-0.516077	-1.06245	-0.0983477	-1.02868	-0.20961	0.00844399	2.14775	0.0511607	-0.663598	0.6482	-3.16153	-1.21892	0.372529	0.0392397	0.821551	-0.130634	-1.85519
52	-0.0596046	1.95404	-0.0710289	-0.113249	0.553827	1.33167	0.275175	0.269214	1.33514	1.25617	0.0243386	0.42369	-1.16179	-0.0521541	0.121693	1.0252	-0.222524	-0.691414	0.187258	-0.609458	0.0536442	0.352164	1.25468	0.358125	0.887116	0.692407	-1.68085	-0.316401	1.08927	1.12355	0.0496705	-0.506639	-2.31862
54	0.150998	1.16676	-0.115732	-0.258783	0.68446	0.698865	0.484784	-0.112752	1.00334	1.09325	0.722706	0.350674	-0.519057	-1.09871	-0.325839	1.94957	-0.435114	-0.701348	0.0988444	-0.647704	-0.20961	0.607967	-1.357	0.77486	1.44939	0.576178	-0.327329	-0.329812	0.913938	0.855823	-1.04358	-0.539422	-1.58946
56	0.38147	0.231961	-0.0819564	-0.51707	0.314911	0.072519	0.578662	-0.215073	-0.0526508	0.233948	0.497699	0.450512	0.527501	-0.620882	-0.604987	1.7941	-0.759959	-0.630816	-0.219544	-0.864764	-0.64075	0.493228	-2.67973	0.887613	0.758966	0.268718	0.0158946	0.109772	-0.0913938	0.574191	-1.20252	-0.653664	-1.08331
58	1.31379	0.34819	0.205636	-0.629326	0.0839432	-0.0089407	0.607471	0.819067	-0.358621	-0.0541409	0.0412265	0.25034	0.650684	-0.723203	-0.233452	1.07785	-0.838439	-0.458956	-0.228484	-0.993411	-0.621875	0.415742	-1.2219	0.407795	-0.269214	0.29852	0.792245	1.65006	-0.51856	0.598033	-0.38445	-1.24325	-1.33216
60	1.41859	0.341733	0.0849366	-1.02967	-0.127653	-0.904997	0.133117	1.68681	-0.163913	0.0874201	-0.0799696	-0.586112	-0.140071	-1.51296	-0.0268221	0.672539	-1.2219	-0.883639	-0.356138	-1.45982	-0.785291	0.187258	0.0248353	-0.754992	-0.825028	0.76443	1.7946	2.4274	-0.448525	0.287592	-0.0705322	-1.75536	-1.47174
62	0.884632	-0.127157	-0.408292	-1.30435	-0.553827	-1.73201	-0.618398	1.00831	-0.601013	-0.202656	0.435611	-1.34856	-1.18713	-1.40816	-0.846386	0.574191	-1.7484	-1.40617	-0.883639	-1.91381	-1.33614	-0.406305	-0.565251	-1.34408	-0.309944	0.609458	1.9441	1.87556	-0.863274	0.0948707	-0.772874	-1.46677	-1.38531
64	1.31627	0.46889	-0.55929	-1.19706	-0.495215	-1.51694	-0.457962	0.330309	-1.27107	-0.516574	0.81559	-0.897547	-2.39611	-0.100334	-1.60336	0.415742	-1.67539	-1.25915	-0.965595	-1.73648	-1.31826	-0.360608	-0.291566	-0.544886	-0.226994	-0.499189	1.78566	1.83582	-1.39922	0.0874201	-0.781814	-0.573695	-2.21133
66	2.0355	1.61678	-0.290076	-0.891586	-0.0377496	-1.32471	0.215073	1.09027	-1.39078	-0.369052	0.742575	0.110269	-3.03735	1.4176	-1.32521	0.16888	-1.20103	-0.799199	-0.413756	-1.27455	-0.753005	0.233948	1.43647	0.452002	-0.928839	-1.37389	1.34557	2.2317	-1.41809	0.307957	0.235935	-0.117719	-3.46651
68	1.98334	1.53184	-0.141064	-0.332296	-0.00844399	-1.24077	0.17186	1.65304	-1.41015	-0.390907	0.796219	-0.124673	-1.87755	1.95553	-0.947714	-0.25034	-1.00285	-0.532468	-0.207623	-1.07338	-0.543892	0.246863	2.13931	0.651181	-0.816584	-0.641743	0.0228484	1.75138	-1.42852	0.886122	0.0486771	-0.352661	-3.55989
70	1.31925	0.21557	-0.603497	-0.0839432	-0.539422	-0.614921	-0.482798	1.10616	-1.89294	-0.769893	0.911951	-0.939767	0.238419	0.546873	-1.18067	-0.819564	-1.2661	-0.667075	-0.59555	-1.2214	-0.763933	-0.265737	1.73946	0.21706	-0.391901	1.01676	-1.24723	0.522534	-1.86364	1.04258	-1.33018	-0.565747	-2.16911
72	0.0973543	-1.71512	-1.54823	-0.753005	-1.43299	-0.410775	-1.43945	0.506639	-2.31514	-0.750025	0.828008	-1.2358	1.2358	-1.10914	-1.47571	-0.64671	-1.93765	-1.37637	-1.18911	-1.83582	-1.33564	-1.0108	0.707805	-0.489255	-1.09176	1.07338	-1.01229	-1.1757	-2.16812	0.329316	-2.17656	-0.300507	0.0908971
74	-1.03861	-2.93901	-1.92324	-1.73201	-1.71363	-1.42604	-1.81993	0.29554	-2.0047	-0.0491738	0.142058	-1.62323	0.356635	-0.735124	-0.834465	1.0103	-2.41697	-2.03898	-1.55568	-2.3365	-1.81049	-1.35948	-1.25716	-0.278155	-2.1716	-0.521044	0.658135	-2.45422	-1.74046	-0.51707	-2.02556	-0.0591079	1.28448
76	-1.29243	-2.43237	-1.37587	-1.94957	-1.01229	-2.21978	-1.16577	0.226994	-1.52489	0.100334	-0.918408	-2.0658	-0.744065	-0.146528	0.456969	2.29726	-2.18948	-1.95801	-1.48465	-2.1254	-1.73549	-0.845393	-2.43535	0.500679	-1.97242	-1.2055	2.21878	-2.3822	-1.31478	-0.793238	-1.206	-0.203152	0.398854
78	-1.40319	-1.49806	-0.580152	-1.4926	-0.589589	-2.19991	-0.609458	0.657638	-1.61976	-0.554323	-1.357	-2.00222	-0.259777	-0.998378	1.07636	1.46776	-1.86662	-1.5532	-1.18663	-1.85718	-1.48664	-0.378986	-1.40717	-0.0456969	-1.05699	-0.430147	1.76479	-1.45982	-1.51048	-0.189245	-0.630319	-0.403821	-0.392894
80	-1.89443	-0.964105	-0.0620882	-0.893076	-0.787775	-1.45088	-0.634293	1.43101	-1.85122	-0.829995	-0.766416	-1.49955	1.71065	-2.01911	1.14292	0.0913938	-1.74642	-1.28746	-0.93778	-1.73748	-1.24623	-0.317891	0.703335	-1.35551	-0.38445	0.607471	-0.386437	-0.228484	-1.83086	1.35054	-0.836949	-0.558297	-0.245372
82	-1.885	-0.102321	-0.283619	-0.33776	-0.881155	-0.382463	-0.707805	1.39326	-1.56413	-0.545382	0.348687	-0.12666	3.83208	-1.18464	1.60038	0.219544	-1.61578	-1.10865	-0.930329	-1.49906	-1.11808	-0.299513	1.1767	-1.75685	-0.13113	1.44641	-0.512103	0.484784	-1.72406	2.25753	-0.25779	-0.630816	-0.847379
84	-1.20699	0.505646	-0.502169	-0.206629	-0.42816	0.225008	-0.154475	1.21246	-0.593066	0.570714	1.22041	1.50204	5.1558	1.32372	2.34693	1.29193	-1.20103	-0.901024	-0.691911	-1.12454	-0.894566	0.17037	-0.135104	-0.664095	-0.131627	2.34743	2.25107	-0.0238419	-0.788768	2.0355	1.43945	-0.463426	-1.7032
86	-0.516077	-0.21706	-0.301003	-0.810623	0.310441	0.696381	0.952681	1.90636	0.201662	1.59045	1.02073	1.31875	4.9	2.14626	2.76764	1.76877	-0.501176	-0.707805	0.00347694	-0.678003	-0.255307	1.03315	-0.246863	0.558297	-0.0332793	3.07361	3.95328	-0.678003	0.147025	1.81198	1.30186	-0.0829498	-1.51495
88	-0.205139	-1.40071	-0.352661	-1.72108	0.941257	0.621378	1.73897	2.82377	0.0263254	1.01825	-0.366569	-0.169873	2.32806	1.49459	2.40306	1.13795	-0.121693	-0.881652	0.591576	-0.579655	0.356138	1.65403	1.40667	0.820061	-0.606477	2.5933	3.03437	-0.472367	-0.0615915	1.18564	-0.480811	0.355144	-0.767906
90	-0.410775	-1.86612	-0.238419	-1.76628	2.04543	0.984967	2.23865	4.00494	0.013411	0.666579	-0.964602	-1.15434	-0.591079	1.72506	1.35948	0.331799	0.536938	-0.909964	1.36197	-0.262757	1.18266	2.46962	4.12613	1.52389	-1.03116	1.23779	0.782808	-0.0973543	-0.160933	0.340243	-0.887116	0.305971	0.0208616
92	-0.844399	-1.65651	0.297527	-0.548363	3.11087	2.95738	2.6683	4.94868	0.733634	1.5984	0.0874201	-0.948707	-1.41462	0.590583	0.606974	0.59257	1.77771	-0.274678	2.29081	0.758966	2.20537	3.35276	5.91328	2.40753	1.01179	0.716746	-1.32124	-0.183284	0.658631	0.679493	-0.494719	-0.39041	0.295043
94	-1.10815	-1.39574	-0.00347694	0.247856	2.33948	3.41932	2.14775	3.48836	0.847379	1.66148	0.731647	-0.522037	-1.12404	-2.2466	0.451505	1.60734	1.69277	-0.0447035	1.82688	0.930329	1.70072	2.67973	3.42826	1.36395	3.34928	1.14789	-1.61429	-0.567238	0.830988	1.16875	-0.930826	-0.917415	-0.548859
96	-1.06394	-1.51396	-0.912944	-0.0581145	0.60449	1.32322	1.27405	0.732144	0.110765	0.463426	0.181794	-0.827014	-1.08133	-2.37674	0.481804	1.98881	0.328819	-0.575185	0.379483	-0.0486771	0.142058	1.14044	-0.68893	-0.533958	3.03835	1.37836	-0.274678	-0.938276	0.000993411	0.135601	-1.28696	-0.89705	-1.70469
98	-0.567734	-1.47621	-0.109772	-0.160436	0.389914	0.288089	1.60486	0.0124176	-0.0561277	-0.151992	-0.25928	-0.626345	-0.596046	0.642737	1.20004	1.01179	-0.0546376	-0.641743	0.137091	-0.301997	-0.0933806	0.980496	-1.08927	-0.257293	1.46727	1.32918	0.832975	-0.727177	-0.232955	-1.16974	-0.567238	-0.63926	-2.06083
100	0.130137	-0.754992	1.85966	0.0586112	1.33912	1.28746	2.19742	1.40667	0.669559	0.236928	0.281135	0.286599	0.229478	2.32706	2.27094	-0.745058	0.551343	-0.144541	0.98596	0.271698	0.775357	1.72853	1.9297	1.64459	0.193218	0.624359	0.421206	-0.000993411	0.371039	-1.14143	0.846386	-0.534952	-1.76082
102	0.434121	0.16739	2.41796	0.0650684	1.91778	2.36382	2.07722	2.61714	1.10269	0.632803	0.820557	0.307461	0.579158	1.51644	2.34892	-1.59293	0.953178	0.303487	1.44442	0.68595	1.22041	2.13236	3.99103	2.68122	0.339746	0.158449	-0.798702	0.417233	0.749032	-0.147521	1.32322	-0.923375	-1.38382
104	0.543892	0.644227	1.51396	0.417729	1.86513	2.92261	1.82043	2.73138	0.90301	0.619392	0.929832	-0.328322	1.3411	0.668069	1.63217	-1.01328	1.06692	0.672042	1.27653	0.940263	1.12553	2.13136	3.01848	2.44329	2.13236	1.53581	-1.39326	0.601013	0.647207	0.997384	0.369549	-1.39475	-1.09772
106	0.913441	0.892083	0.672539	1.1608	1.37736	2.93752	1.2219	2.31564	0.611941	0.396371	0.80963	-0.452002	2.32706	0.532965	1.05848	-0.141561	0.991921	0.870724	0.90301	1.04606	0.819067	1.64807	1.46627	2.15073	3.32693	2.62062	-1.09673	1.1464	0.353654	1.47174	-0.536938	-1.18166	-1.3123
108	1.85221	1.4623	0.664095	1.40617	1.13646	2.37624	0.68297	2.00967	0.718733	0.596046	0.366072	-0.316401	2.31216	0.842412	1.15633	0.537932	0.922382	0.868241	0.886122	0.986954	0.773867	1.35154	1.4931	1.86513	2.73486	2.54611	-0.0158946	1.94808	0.415742	1.65602	-0.324349	-0.493228	-2.23666
110	2.95788	1.89493	0.892579	0.693897	1.27951	1.8239	0.488758	1.47223	0.744065	0.769893	0.582139	-0.0362595	1.3863	1.50204	1.51843	0.268718	1.02023	0.706812	0.996888	0.918905	0.98149	1.50998	2.36978	1.03166	1.23133	2.43088	1.42256	2.21779	0.502666	2.37823	0.549356	-0.157952	-2.82923
112	2.26845	1.08778	0.774364	-0.530481	1.37587	1.19656	-0.155469	0.139574	-0.0283122	-0.390907	1.09971	0.089407	-0.205139	1.90089	1.15285	-1.21991	0.977019	0.3015	0.557303	0.783304	0.829498	1.37736	2.45969	0.829995	0.0163913	1.63813	1.21395	1.24425	-0.377993	2.01911	0.957648	-0.103811	-1.9456
114	0.119706	-0.311931	0.678996	-0.94076	1.53879	1.16775	-0.410775	-0.8593	-0.966589	-1.47223	1.40866	-0.493725	-1.29441	0.743071	0.183781	-1.84129	1.22637	0.182291	0.347694	1.03464	0.848373	1.30733	2.25107	1.4176	0.302494	0.564257	-1.24723	0.307957	-1.206	0.94225	0.454982	-0.187755	-0.504653
116	-1.18564	-0.677506	1.08629	-0.164906	1.86463	1.69476	0.180304	-1.21693	-1.44641	-1.39376	1.25964	-0.611941	-0.703335	-0.748535	-0.407298	-0.748535	1.91679	0.77486	0.544389	1.81347	1.23282	1.63813	1.60535	2.40207	1.70867	0.12219	-2.29528	0.622868	-1.27008	0.792245	0.0754992	-0.467896	0.0432134
118	-1.0709	0.0501672	1.49657	0.25332	1.77771	1.59641	-0.185768	-2.00868	-1.70469	-1.65353	0.46442	0.0904004	0.665585	0.0372529	-0.245869	-0.0685453	2.08666	1.2219	0.08593	2.21928	0.997881	1.39078	-0.406305	2.91864	2.06778	-0.376999	-0.0933806	1.19905	-1.49608	1.1002	1.13746	-0.749528	-0.191728
120	-0.401835	0.64671	1.61876	0.282625	1.36793	1.44243	-1.72903	-2.45621	-1.79211	-2.70903	0.753999	0.378489	1.30186	0.795722	0.316898	-0.776351	1.97738	1.39674	-0.543396	2.3519	0.527998	0.555317	-1.11411	2.50389	1.98682	-1.40021	1.80155	1.01924	-2.06729	1.87457	1.71562	-0.80814	-0.261267
122	-0.163416	0.188748	1.91579	0.899037	1.47869	1.27504	-2.72443	-2.4721	-1.93268	-3.77844	1.63664	0.383457	0.785291	0.305971	0.588596	-1.54922	2.2312	1.8393	-0.801186	2.73039	0.496209	0.229975	0.0317891	2.58138	2.38816	-1.85718	1.55667	0.0342727	-2.59876	2.57641	0.341733	-0.492235	0.453492
124	0.325839	-0.0650684	1.81546	1.41362	1.62969	1.12007	-2.61764	-2.89629	-2.20686	-4.20163	2.05139	0.954171	0.521044	1.68284	0.365575	-2.04941	2.41796	2.1413	-0.953178	3.0001	0.612934	0.38743	0.742575	2.33352	2.19693	-0.989437	0.929336	-0.309447	-2.85705	3.38008	-0.0248353	-0.595053	0.968575
126	1.5835	0.903507	1.11709	1.53134	1.5378	1.80999	-1.9908	-2.53121	-2.45621	-4.02182	2.91566	1.59194	1.39425	3.81271	-0.26077	-3.32942	2.64794	2.24213	-0.749528	3.20822	0.920395	0.621875	1.5835	1.45187	1.87804	0.219047	0.435114	1.0709	-2.8789	4.38094	1.11858	-1.42207	0.77486
128	2.14726	1.73102	1.64459	1.72257	2.0653	2.86003	-1.48267	-1.21047	-2.639	-3.82215	3.29465	1.58499	2.70307	3.90063	-1.20252	-4.13011	3.31302	2.75423	-0.301997	3.76999	1.4623	1.1002	2.47657	2.20339	2.05537	0.961125	-0.169873	2.36531	-2.91715	3.91652	2.02109	-1.67141	1.23332
130	1.8701	1.88202	3.36915	1.72704	2.58436	2.49197	-1.62075	-1.66843	-2.79943	-4.01984	2.83122	1.5681	3.90311	3.71685	-2.19941	-3.40044	3.60062	3.32644	-0.497699	4.22845	1.34508	1.33167	0.90152	3.44266	2.18302	1.19408	-0.285606	2.44627	-3.13173	2.93404	3.08802	-0.761946	2.01513
132	2.33203	2.0802	4.69585	1.76082	2.58535	1.59542	-2.11149	-3.69896	-3.03735	-4.49071	2.67178	2.18451	4.28706	4.05411	-2.94944	-3.30309	3.50773	3.67165	-1.17173	4.48773	0.717243	1.09375	-1.51594	3.78887	2.5774	0.841419	-0.238915	2.57095	-3.40144	3.30855	3.83655	-0.144541	1.3724
134	3.39647	2.44776	5.23428	2.15967	2.82129	1.884	-2.42889	-4.52101	-2.94298	-4.43061	2.95987	2.91616	3.71238	2.98768	-3.24994	-4.09037	3.90063	4.15544	-1.30534	4.9899	0.753502	1.00036	-1.57257	4.70082	3.4228	0.320872	-0.887116	3.09149	-3.27627	4.34568	3.36617	-0.588596	0.00447035
136	3.34432	2.28683	4.72913	2.22524	2.94844	2.03351	-3.05573	-4.81308	-2.75224	-3.81321	2.82377	2.72195	2.2764	0.42965	-3.41336	-3.8301	4.11669	4.3124	-1.46925	5.13196	0.864267	0.806153	-1.05302	5.7886	3.6026	-0.328322	-1.69575	3.15557	-2.93205	4.3427	2.19742	-1.06047	-0.321368
138	2.38866	1.91579	3.58969	2.23766	2.48998	1.56264	-4.11222	-5.41061	-3.1357	-3.86735	2.16514	2.17358	0.814597	-0.855823	-3.65774	-3.08454	3.65923	3.96123	-2.18501	4.63575	0.310441	0.191232	-1.2517	5.28196	2.82427	-1.03613	-0.889103	2.73188	-3.29862	3.33885	1.64409	-0.877182	-0.322362
140	2.34594	2.82774	3.28024	2.93503	1.94559	1.61479	-4.58658	-4.90447	-3.72529	-4.77036	2.37276	2.55654	0.704825	0.372529	-3.60906	-3.3473	3.3627	3.91354	-2.58684	4.42117	-0.0779827	-0.372529	-0.732144	3.84748	2.28286	-0.959635	1.00484	2.95589	-4.10279	2.86053	2.22822	-0.394881	-1.33912
142	3.35574	4.66655	4.45048	4.03275	2.13931	2.79893	-3.86735	-3.53108	-3.72579	-4.84536	3.24498	3.36369	0.571708	1.2959	-3.33687	-3.66519	3.94235	4.72566	-2.16464	5.27104	0.435611	-0.0740091	0.676016	4.21703	3.63042	-0.604987	0.894566	3.7243	-4.07	2.92063	2.90672	-0.50813	-2.57492
[truncated: 429 more rows]

## Sheet: 25
	FP1	FP2	F3	F4	C3	C4	P3	P4	O1	O2	F7	F8	T3	T4	T5	T6	CZ	FZ	PZ	FCZ	CPZ	CP3	CP4	FC3	FC4	TP7	TP8	FPZ	OZ	FT7	FT8	A1	BP1
[truncated: 601 more rows]

## Sheet: 26
	FP1	FP2	F3	F4	C3	C4	P3	P4	O1	O2	F7	F8	T3	T4	T5	T6	CZ	FZ	PZ	FCZ	CPZ	CP3	CP4	FC3	FC4	TP7	TP8	FPZ	OZ	FT7	FT8	A1	BP1
[truncated: 601 more rows]

## Sheet: 30
	FP1	FP2	F3	F4	C3	C4	P3	P4	O1	O2	F7	F8	T3	T4	T5	T6	CZ	FZ	PZ	FCZ	CPZ	CP3	CP4	FC3	FC4	TP7	TP8	FPZ	OZ	FT7	FT8	A1	BP1
[truncated: 601 more rows]

[truncated: 4 more sheets: 31, 33, 35, 36]
